# Supplementary material for: Metabolically Active Microbial Communities in Oilfields: A Systematic Review and Synthesis of RNA Preservation, Extraction, and Sequencing Methods
Source: MDPI journal article supplement (doi:10.3390/applmicrobiol3040079), 2023-10-06
Supplement: s1 [file s1]

**Supplementary Table S7. Description of the groups of corrosion-influencing microorganisms.**

|    | Reference                      | Sample | *Description of MIC microbial groups                                                                                                                                                                                                  |
|----|--------------------------------|--------|---------------------------------------------------------------------------------------------------------------------------------------------------------------------------------------------------------------------------------------|
| 13 | Salgar-Chaparro et al. (2020a) | PW.MIC | sulphate-reducing bacteria (SRB), thiosulphate-reducing bacteria (TRB), methanogenic archaea (MET), acid-producing bacteria (APB), iron-reducing bacteria (IRB), iron-oxidising bacteria (IOB), and general anaerobic bacteria (GANB) |
| 14 | Salgar-Chaparro et al. (2020b) | PW.MIC | sulphate-reducing bacteria (SRB), thiosulphate-reducing bacteria (TRB), methanogenic archaea, acid-producing bacteria (APB), iron-reducing bacteria (IRB), and iron-oxidising bacteria (IOB)                                          |
| 17 | Albahri et al. (2021)          | PW.MIC | methanogenic archaea, fermenting and sulphidogenic microorganisms                                                                                                                                                                     |

corrosion-influencing microorganisms (CIM)

\* Description of the microbial groups was copied from the methodology section of the articles.
