# Supplementary material for: Metabolically Active Microbial Communities in Oilfields: A Systematic Review and Synthesis of RNA Preservation, Extraction, and Sequencing Methods
Source: MDPI journal article supplement (doi:10.3390/applmicrobiol3040079), 2023-10-06
Supplement: s1 [file s1]

Archive with 12 entries (12 files):
- Table S1 - PRISMA-S checklist.pdf
- Table S1. MEDLINE.PubMed (Search in Title or abstract)_154 record_20.01.2023.csv
- Table S1. script format_input_pubmed.xlsx
- Table S2. script format_input_pmc.xlsx
- Table S2_Search terms.pdf
- Table S3. Scopus ((title or abstract or keyword)_1650 records_20.01.2023.csv
- Table S3. script format_input_scopus.xlsx
- Table S4. script format_input_web of science.xlsx
- Table S4. Web of Science (Search in title or abstract or keyword)_697 records _20.01.2023.xls
- Table S5 - Included studies.pdf
- Table S6. Composition of the metabolically active microorganisms.xlsx
- Table S7. Description of the CIM groups.pdf
