# Supplementary material for: Metabolically Active Microbial Communities in Oilfields: A Systematic Review and Synthesis of RNA Preservation, Extraction, and Sequencing Methods
Source: MDPI journal article supplement (doi:10.3390/applmicrobiol3040079), 2023-10-06
Supplement: s1 [file s1 › Table S1 - PRISMA-S checklist.pdf]

**Supplementary Table S1. PRISMA-S checklist**

| INFORMATION SOURCES AND METHODS |    |                                                                                                                                                                                                                                                                    |  |
|---------------------------------|----|--------------------------------------------------------------------------------------------------------------------------------------------------------------------------------------------------------------------------------------------------------------------|--|
| Database name                   | 1  | Name each individual database searched, stating the platform for each.                                                                                                                                                                                             |  |
| Interface                       | 2  | State the platform for each database searched.                                                                                                                                                                                                                     |  |
| Multi-database searching        | 3  | If databases were searched simultaneously on a single platform, state the name of the platform, listing all of the databases searched.                                                                                                                             |  |
| Study registries                | 4  | List any study registries searched.                                                                                                                                                                                                                                |  |
| Online resources                | 5  | List web search engines, specific web sites, conference proceedings, or other resource searched.                                                                                                                                                                   |  |
| Online resources and browsing   | 6  | Describe any online or print source purposefully searched or browsed (e.g., tables of contents, print conference proceedings, web sites), and how this was done.                                                                                                   |  |
| Citation searching              | 7  | Indicate whether cited references or citing references were examined, and describe any methods used for locating cited/citing references (e.g., browsing reference lists, using a citation index, setting up email alerts for references citing included studies). |  |
| Contacts                        | 8  | Indicate whether additional studies or data were sought by contacting authors, experts, manufacturers, or others.                                                                                                                                                  |  |
| Other methods                   | 9  | Describe any additional information sources or search methods used.                                                                                                                                                                                                |  |
| SEARCH STRATEGIES               |    |                                                                                                                                                                                                                                                                    |  |
| Full search strategies          | 8  | Include the search strategies for each database and information source, copied and pasted exactly as run.                                                                                                                                                          |  |
| Limits and restrictions         | 9  | Specify that no limits were used, or describe any limits or restrictions applied to a search (e.g., date or time period, language, study design) and provide justification for their use.                                                                          |  |
| Search filters                  | 10 | Indicate whether published search filters were used (as originally designed or modified), and if so, cite the filter(s) used.                                                                                                                                      |  |
| Prior work                      | 11 | Indicate when search strategies from other literature reviews were adapted or reused for a substantive part or all of the search, citing the previous review(s).                                                                                                   |  |
| Updates                         | 12 | Report the methods used to update the search(es) (e.g., rerunning searches, email alerts).                                                                                                                                                                         |  |
| Dates of searches               | 13 | For each search strategy, provide the date when the last search occurred.                                                                                                                                                                                          |  |
| PEER REVIEW                     |    |                                                                                                                                                                                                                                                                    |  |
| Peer review                     | 14 | Describe any search peer review process.                                                                                                                                                                                                                           |  |
| MANAGING RECORDS                |    |                                                                                                                                                                                                                                                                    |  |
| Total Records                   | 15 | Document the total number of records identified from each database and other information sources.                                                                                                                                                                  |  |
| Deduplication                   | 16 | Describe the processes and any software used to deduplicate records from multiple database searches and other information sources.                                                                                                                                 |  |

PRISMA-S: An Extension to the PRISMA Statement for Reporting Literature Searches in Systematic Reviews  
 Rethlefsen ML, Kirtley S, Waffenschmidt S, Ayala AP, Moher D, Page MJ, Koffel JB, PRISMA-S Group.  
 Last updated February 27, 2020.
