# Supplementary material for: Metabolically Active Microbial Communities in Oilfields: A Systematic Review and Synthesis of RNA Preservation, Extraction, and Sequencing Methods
Source: MDPI journal article supplement (doi:10.3390/applmicrobiol3040079), 2023-10-06
Supplement: s1 [file s1 › Table S1. MEDLINE.PubMed (Search in Title or abstract)_154 record_20.01.2023.csv]

PMID	Title	Authors	Citation	First Author	Journal/Book	Publication Year	Create Date	PMCID	NIHMS ID	DOI
31901447	Lipid Droplet-Derived Monounsaturated Fatty Acids Traffic via PLIN5 to Allosterically Activate SIRT1	Najt CP, Khan SA, Heden TD, Witthuhn BA, Perez M, Heier JL, Mead LE, Franklin MP, Karanja KK, Graham MJ, Mashek MT, Bernlohr DA, Parker L, Chow LS, Mashek DG.	Mol Cell. 2020 Feb 20;77(4):810-824.e8. doi: 10.1016/j.molcel.2019.12.003. Epub 2019 Dec 31.	Najt CP	Mol Cell	2020	2020/01/06	PMC7036014	NIHMS1546209	10.1016/j.molcel.2019.12.003
27553510	Transport and transcriptional regulation of oil production in plants	Manan S, Chen B, She G, Wan X, Zhao J.	Crit Rev Biotechnol. 2017 Aug;37(5):641-655. doi: 10.1080/07388551.2016.1212185. Epub 2016 Aug 23.	Manan S	Crit Rev Biotechnol	2017	2016/08/25			10.1080/07388551.2016.1212185
33410029	Bacterial and archaeal diversity in oil fields and reservoirs and their potential role in hydrocarbon recovery and bioprospecting	Singh NK, Choudhary S.	Environ Sci Pollut Res Int. 2021 Nov;28(42):58819-58836. doi: 10.1007/s11356-020-11705-z. Epub 2021 Jan 6.	Singh NK	Environ Sci Pollut Res Int	2021	2021/01/07			10.1007/s11356-020-11705-z
34349773	Isoprenoid Metabolism and Engineering in Glandular Trichomes of Lamiaceae	Mahmoud SS, Maddock S, Adal AM.	Front Plant Sci. 2021 Jul 19;12:699157. doi: 10.3389/fpls.2021.699157. eCollection 2021.	Mahmoud SS	Front Plant Sci	2021	2021/08/05	PMC8326662		10.3389/fpls.2021.699157
29304850	Metabolic capability and in situ activity of microorganisms in an oil reservoir	Liu YF, Galzerani DD, Mbadinga SM, Zaramela LS, Gu JD, Mu BZ, Zengler K.	Microbiome. 2018 Jan 5;6(1):5. doi: 10.1186/s40168-017-0392-1.	Liu YF	Microbiome	2018	2018/01/07	PMC5756336		10.1186/s40168-017-0392-1
32166983	Potential applications of microbial enhanced oil recovery to heavy oil	Zhang J, Gao H, Xue Q.	Crit Rev Biotechnol. 2020 Jun;40(4):459-474. doi: 10.1080/07388551.2020.1739618. Epub 2020 Mar 13.	Zhang J	Crit Rev Biotechnol	2020	2020/03/14			10.1080/07388551.2020.1739618
35703501	Bathiapeptides: Polythiazole-Containing Peptides from a Marine Biofilm-Derived Bacillus sp	Wu C, Tang J, Limlingan Malit JJ, Wang R, Sung HH, Williams ID, Qian PY.	J Nat Prod. 2022 Jul 22;85(7):1751-1762. doi: 10.1021/acs.jnatprod.2c00290. Epub 2022 Jun 15.	Wu C	J Nat Prod	2022	2022/06/15			10.1021/acs.jnatprod.2c00290
33322274	The Diverse Roles of the Global Transcriptional Regulator PhoP in the Lifecycle of Yersinia pestis	Fukuto HS, Viboud GI, Vadyvaloo V.	Pathogens. 2020 Dec 11;9(12):1039. doi: 10.3390/pathogens9121039.	Fukuto HS	Pathogens	2020	2020/12/16	PMC7764729		10.3390/pathogens9121039
28524866	Succession in the petroleum reservoir microbiome through an oil field production lifecycle	Vigneron A, Alsop EB, Lomans BP, Kyrpides NC, Head IM, Tsesmetzis N.	ISME J. 2017 Sep;11(9):2141-2154. doi: 10.1038/ismej.2017.78. Epub 2017 May 19.	Vigneron A	ISME J	2017	2017/05/20	PMC5563965		10.1038/ismej.2017.78
30759613	Characterizing the microbiome in petroleum reservoir flooded by different water sources	Wang X, Li X, Yu L, Huang L, Xiu J, Lin W, Zhang Y.	Sci Total Environ. 2019 Feb 25;653:872-885. doi: 10.1016/j.scitotenv.2018.10.410. Epub 2018 Oct 31.	Wang X	Sci Total Environ	2019	2019/02/15			10.1016/j.scitotenv.2018.10.410
28487680	Diversity of Metabolically Active Bacteria in Water-Flooded High-Temperature Heavy Oil Reservoir	Nazina TN, Shestakova NM, Semenova EM, Korshunova AV, Kostrukova NK, Tourova TP, Min L, Feng Q, Poltaraus AB.	Front Microbiol. 2017 Apr 25;8:707. doi: 10.3389/fmicb.2017.00707. eCollection 2017.	Nazina TN	Front Microbiol	2017	2017/05/11	PMC5403907		10.3389/fmicb.2017.00707
26959375	Methanogenic Hydrocarbon Degradation: Evidence from Field and Laboratory Studies	Jiménez N, Richnow HH, Vogt C, Treude T, Krüger M.	J Mol Microbiol Biotechnol. 2016;26(1-3):227-42. doi: 10.1159/000441679. Epub 2016 Mar 10.	Jiménez N	J Mol Microbiol Biotechnol	2016	2016/03/10			10.1159/000441679
19203651	Microbial processes in oil fields: culprits, problems, and opportunities	Youssef N, Elshahed MS, McInerney MJ.	Adv Appl Microbiol. 2009;66:141-251. doi: 10.1016/S0065-2164(08)00806-X.	Youssef N	Adv Appl Microbiol	2009	2009/02/11			10.1016/S0065-2164(08)00806-X
24730445	Microbial abundance and community composition influence production performance in a low-temperature petroleum reservoir	Li G, Gao P, Wu Y, Tian H, Dai X, Wang Y, Cui Q, Zhang H, Pan X, Dong H, Ma T.	Environ Sci Technol. 2014 May 6;48(9):5336-44. doi: 10.1021/es500239w. Epub 2014 Apr 22.	Li G	Environ Sci Technol	2014	2014/04/16			10.1021/es500239w
34835392	Metagenomic Investigation of a Low Diversity, High Salinity Offshore Oil Reservoir	Scheffer G, Hubert CRJ, Enning DR, Lahme S, Mand J, de Rezende JR.	Microorganisms. 2021 Oct 31;9(11):2266. doi: 10.3390/microorganisms9112266.	Scheffer G	Microorganisms	2021	2021/11/27	PMC8621343		10.3390/microorganisms9112266
25216580	Crude oil degradation by bacterial consortia under four different redox and temperature conditions	Xiong S, Li X, Chen J, Zhao L, Zhang H, Zhang X.	Appl Microbiol Biotechnol. 2015 Feb;99(3):1451-61. doi: 10.1007/s00253-014-6042-7. Epub 2014 Sep 13.	Xiong S	Appl Microbiol Biotechnol	2015	2014/09/14			10.1007/s00253-014-6042-7
29186812	Biotechnological Applications of Microbial (Per)chlorate Reduction	Wang O, Coates JD.	Microorganisms. 2017 Nov 24;5(4):76. doi: 10.3390/microorganisms5040076.	Wang O	Microorganisms	2017	2017/12/01	PMC5748585		10.3390/microorganisms5040076
24920265	Phylogenetic analysis of the microbial community in hypersaline petroleum produced water from the Campos Basin	Piubeli F, Grossman MJ, Fantinatti-Garboggini F, Durrant LR.	Environ Sci Pollut Res Int. 2014 Oct;21(20):12006-16. doi: 10.1007/s11356-014-3155-6. Epub 2014 Jun 13.	Piubeli F	Environ Sci Pollut Res Int	2014	2014/06/13			10.1007/s11356-014-3155-6
31980429	Nutrient Level Determines Biofilm Characteristics and Subsequent Impact on Microbial Corrosion and Biocide Effectiveness	Salgar-Chaparro SJ, Lepkova K, Pojtanabuntoeng T, Darwin A, Machuca LL.	Appl Environ Microbiol. 2020 Mar 18;86(7):e02885-19. doi: 10.1128/AEM.02885-19. Print 2020 Mar 18.	Salgar-Chaparro SJ	Appl Environ Microbiol	2020	2020/01/26	PMC7082584		10.1128/AEM.02885-19
26896143	Complementary Microorganisms in Highly Corrosive Biofilms from an Offshore Oil Production Facility	Vigneron A, Alsop EB, Chambers B, Lomans BP, Head IM, Tsesmetzis N.	Appl Environ Microbiol. 2016 Apr 4;82(8):2545-2554. doi: 10.1128/AEM.03842-15. Print 2016 Apr.	Vigneron A	Appl Environ Microbiol	2016	2016/02/21	PMC4959487		10.1128/AEM.03842-15
14665675	Recent advances in petroleum microbiology	Van Hamme JD, Singh A, Ward OP.	Microbiol Mol Biol Rev. 2003 Dec;67(4):503-49. doi: 10.1128/MMBR.67.4.503-549.2003.	Van Hamme JD	Microbiol Mol Biol Rev	2003	2003/12/11	PMC309048		10.1128/MMBR.67.4.503-549.2003
25641701	Microbial diversity and abundance in the Xinjiang Luliang long-term water-flooding petroleum reservoir	Gao P, Tian H, Li G, Sun H, Ma T.	Microbiologyopen. 2015 Apr;4(2):332-342. doi: 10.1002/mbo3.241. Epub 2015 Feb 2.	Gao P	Microbiologyopen	2015	2015/02/03	PMC4398513		10.1002/mbo3.241
35660401	Metabolomics reveals primary response of wheat (Triticum aestivum) to irrigation with oilfield produced water	Sedlacko EM, Heuberger AL, Chaparro JM, Cath TY, Higgins CP.	Environ Res. 2022 Sep;212(Pt D):113547. doi: 10.1016/j.envres.2022.113547. Epub 2022 Jun 1.	Sedlacko EM	Environ Res	2022	2022/06/06			10.1016/j.envres.2022.113547
35695567	The Microbial Community and Functional Potential in the Midland Basin Reveal a Community Dominated by Both Thiosulfate and Sulfate-Reducing Microorganisms	Tinker K, Lipus D, Gardiner J, Stuckman M, Gulliver D.	Microbiol Spectr. 2022 Aug 31;10(4):e0004922. doi: 10.1128/spectrum.00049-22. Epub 2022 Jun 13.	Tinker K	Microbiol Spectr	2022	2022/06/13	PMC9430316		10.1128/spectrum.00049-22
30975332	Vertical response of microbial community and degrading genes to petroleum hydrocarbon contamination in saline alkaline soil	Liu Q, Tang J, Liu X, Song B, Zhen M, Ashbolt NJ.	J Environ Sci (China). 2019 Jul;81:80-92. doi: 10.1016/j.jes.2019.02.001. Epub 2019 Feb 14.	Liu Q	J Environ Sci (China)	2019	2019/04/13			10.1016/j.jes.2019.02.001
35688243	Culture-dependent and culture-independent methods reveal microbe-clay mineral interactions by dissimilatory iron-reducing bacteria in an integral oilfield	Dong H, Zhang F, Xu T, Liu Y, Du Y, Wang C, Liu T, Gao J, He Y, Wang X, Sun S, She Y.	Sci Total Environ. 2022 Sep 20;840:156577. doi: 10.1016/j.scitotenv.2022.156577. Epub 2022 Jun 7.	Dong H	Sci Total Environ	2022	2022/06/10			10.1016/j.scitotenv.2022.156577
30800590	Role of thermophilic bacteria (Bacillus and Geobacillus) on crude oil degradation and biocorrosion in oil reservoir environment	Elumalai P, Parthipan P, Narenkumar J, Anandakumar B, Madhavan J, Oh BT, Rajasekar A.	3 Biotech. 2019 Mar;9(3):79. doi: 10.1007/s13205-019-1604-0. Epub 2019 Feb 12.	Elumalai P	3 Biotech	2019	2019/02/26	PMC6372418		10.1007/s13205-019-1604-0
34498042	Extensive Horizontal Gene Transfer within and between Species of Coagulase-Negative Staphylococcus	Smith JT, Andam CP.	Genome Biol Evol. 2021 Sep 1;13(9):evab206. doi: 10.1093/gbe/evab206.	Smith JT	Genome Biol Evol	2021	2021/09/09	PMC8462280		10.1093/gbe/evab206
33042080	Fungal Community, Metabolic Diversity, and Glomalin-Related Soil Proteins (GRSP) Content in Soil Contaminated With Crude Oil After Long-Term Natural Bioremediation	Gałązka A, Grządziel J, Gałązka R, Gawryjołek K, Ukalska-Jaruga A, Smreczak B.	Front Microbiol. 2020 Sep 17;11:572314. doi: 10.3389/fmicb.2020.572314. eCollection 2020.	Gałązka A	Front Microbiol	2020	2020/10/12	PMC7528562		10.3389/fmicb.2020.572314
33042074	Methanogens Within a High Salinity Oil Reservoir From the Gulf of Mexico	Christman GD, León-Zayas RI, Summers ZM, Biddle JF.	Front Microbiol. 2020 Sep 18;11:570714. doi: 10.3389/fmicb.2020.570714. eCollection 2020.	Christman GD	Front Microbiol	2020	2020/10/12	PMC7530209		10.3389/fmicb.2020.570714
36113659	Assessment of bioremediation potential of petroleum-contaminated soils from the shanbei oilfield of China revealed by qPCR and high throughput sequencing	Wu M, Liu Z, Gao H, Gao J, Xu Y, Ou Y.	Chemosphere. 2022 Dec;308(Pt 3):136446. doi: 10.1016/j.chemosphere.2022.136446. Epub 2022 Sep 13.	Wu M	Chemosphere	2022	2022/09/16			10.1016/j.chemosphere.2022.136446
31645605	A cost-effective and environmentally sustainable process for phycoremediation of oil field formation water for its safe disposal and reuse	Das B, Deka S.	Sci Rep. 2019 Oct 23;9(1):15232. doi: 10.1038/s41598-019-51806-5.	Das B	Sci Rep	2019	2019/10/25	PMC6811566		10.1038/s41598-019-51806-5
33899251	Dental biofilm of symptomatic COVID-19 patients harbours SARS-CoV-2	Gomes SC, Fachin S, da Fonseca JG, Angst PDM, Lamers ML, da Silva ISB, Nunes LN.	J Clin Periodontol. 2021 Jul;48(7):880-885. doi: 10.1111/jcpe.13471. Epub 2021 May 4.	Gomes SC	J Clin Periodontol	2021	2021/04/26	PMC8251434		10.1111/jcpe.13471
33871774	Characterization of microbial response to petroleum hydrocarbon contamination in a lacustrine ecosystem	D'Ugo E, Bruno M, Mukherjee A, Chattopadhyay D, Giuseppetti R, De Pace R, Magurano F.	Environ Sci Pollut Res Int. 2021 May;28(20):26187-26196. doi: 10.1007/s11356-021-13885-8. Epub 2021 Apr 19.	D'Ugo E	Environ Sci Pollut Res Int	2021	2021/04/19	PMC8154760		10.1007/s11356-021-13885-8
34734348	Genomics and simulated laboratory studies reveal Thermococcus sp. 101C5 as a novel hyperthermophilic archaeon possessing a specialized metabolic arsenal for enhanced oil recovery	Kapse NG, Paliwal V, Dagar SS, Rana DP, Dhakephalkar PK.	Antonie Van Leeuwenhoek. 2022 Jan;115(1):19-31. doi: 10.1007/s10482-021-01667-8. Epub 2021 Nov 3.	Kapse NG	Antonie Van Leeuwenhoek	2022	2021/11/04			10.1007/s10482-021-01667-8
24084200	Study on bioadsorption and biodegradation of petroleum hydrocarbons by a microbial consortium	Xu N, Bao M, Sun P, Li Y.	Bioresour Technol. 2013 Dec;149:22-30. doi: 10.1016/j.biortech.2013.09.024. Epub 2013 Sep 13.	Xu N	Bioresour Technol	2013	2013/10/03			10.1016/j.biortech.2013.09.024
27812803	Ammonium removal from high-salinity oilfield-produced water: assessing the microbial community dynamics at increasing salt concentrations	Quartaroli L, Silva LC, Silva CM, Lima HS, de Paula SO, de Oliveira VM, de Cássia S da Silva M, Kasuya MC, de Sousa MP, Torres AP, Souza RS, Bassin JP, da Silva CC.	Appl Microbiol Biotechnol. 2017 Jan;101(2):859-870. doi: 10.1007/s00253-016-7902-0. Epub 2016 Nov 4.	Quartaroli L	Appl Microbiol Biotechnol	2017	2016/11/05			10.1007/s00253-016-7902-0
32266503	Long-chain n-alkane biodegradation coupling to methane production in an enriched culture from production water of a high-temperature oil reservoir	Chen J, Liu YF, Zhou L, Irfan M, Hou ZW, Li W, Mbadinga SM, Liu JF, Yang SZ, Wu XL, Gu JD, Mu BZ.	AMB Express. 2020 Apr 7;10(1):63. doi: 10.1186/s13568-020-00998-5.	Chen J	AMB Express	2020	2020/04/09	PMC7138878		10.1186/s13568-020-00998-5
19447963	Metabolic versatility and indigenous origin of the archaeon Thermococcus sibiricus, isolated from a siberian oil reservoir, as revealed by genome analysis	Mardanov AV, Ravin NV, Svetlitchnyi VA, Beletsky AV, Miroshnichenko ML, Bonch-Osmolovskaya EA, Skryabin KG.	Appl Environ Microbiol. 2009 Jul;75(13):4580-8. doi: 10.1128/AEM.00718-09. Epub 2009 May 15.	Mardanov AV	Appl Environ Microbiol	2009	2009/05/19	PMC2704819		10.1128/AEM.00718-09
32745846	Simultaneous detection of transcribed functional assA gene and the corresponding metabolites of linear alkanes (C(4), C(5), and C(7)) in production water of a low-temperature oil reservoir	Liu JF, Lu YW, Zhou L, Li W, Hou ZW, Yang SZ, Wu XL, Gu JD, Mu BZ.	Sci Total Environ. 2020 Dec 1;746:141290. doi: 10.1016/j.scitotenv.2020.141290. Epub 2020 Jul 27.	Liu JF	Sci Total Environ	2020	2020/08/04			10.1016/j.scitotenv.2020.141290
31787960	Complementary DNA/RNA-Based Profiling: Characterization of Corrosive Microbial Communities and Their Functional Profiles in an Oil Production Facility	Salgar-Chaparro SJ, Machuca LL.	Front Microbiol. 2019 Nov 7;10:2587. doi: 10.3389/fmicb.2019.02587. eCollection 2019.	Salgar-Chaparro SJ	Front Microbiol	2019	2019/12/03	PMC6853844		10.3389/fmicb.2019.02587
32014760	In depth metagenomic analysis in contrasting oil wells reveals syntrophic bacterial and archaeal associations for oil biodegradation in petroleum reservoirs	Sierra-Garcia IN, Belgini DRB, Torres-Ballesteros A, Paez-Espino D, Capilla R, Santos Neto EV, Gray N, de Oliveira VM.	Sci Total Environ. 2020 May 1;715:136646. doi: 10.1016/j.scitotenv.2020.136646. Epub 2020 Jan 15.	Sierra-Garcia IN	Sci Total Environ	2020	2020/02/05			10.1016/j.scitotenv.2020.136646
32184369	Genomic and Transcriptomic Evidence Supports Methane Metabolism in Archaeoglobi	Liu YF, Chen J, Zaramela LS, Wang LY, Mbadinga SM, Hou ZW, Wu XL, Gu JD, Zengler K, Mu BZ.	mSystems. 2020 Mar 17;5(2):e00651-19. doi: 10.1128/mSystems.00651-19.	Liu YF	mSystems	2020	2020/03/19	PMC7380581		10.1128/mSystems.00651-19
30446554	Metabolites of an Oil Field Sulfide-Oxidizing, Nitrate-Reducing Sulfurimonas sp. Cause Severe Corrosion	Lahme S, Enning D, Callbeck CM, Menendez Vega D, Curtis TP, Head IM, Hubert CRJ.	Appl Environ Microbiol. 2019 Jan 23;85(3):e01891-18. doi: 10.1128/AEM.01891-18. Print 2019 Feb 1.	Lahme S	Appl Environ Microbiol	2019	2018/11/18	PMC6344618		10.1128/AEM.01891-18
28763134	Response of microbial community and catabolic genes to simulated petroleum hydrocarbon spills in soils/sediments from different geographic locations	Liu Q, Tang J, Liu X, Song B, Zhen M, Ashbolt NJ.	J Appl Microbiol. 2017 Oct;123(4):875-885. doi: 10.1111/jam.13549. Epub 2017 Sep 11.	Liu Q	J Appl Microbiol	2017	2017/08/02			10.1111/jam.13549
32795799	Halomonas plays a central role in the syntrophic community of an alkaline oil reservoir with alkali-surfactant-polymer (ASP) flooding	Chen Y, Pan J, Yun Y, Zhi B, Li G, Li M, Ma T.	Sci Total Environ. 2020 Dec 10;747:141333. doi: 10.1016/j.scitotenv.2020.141333. Epub 2020 Jul 29.	Chen Y	Sci Total Environ	2020	2020/08/16			10.1016/j.scitotenv.2020.141333
35891956	Experimental Study on Microbial Induced Calcium Carbonate Precipitation to Enhance Reservoir Recovery	Zhong M, Liu B, Zhang L, Wang J, Chen J, Li J, Liu Y, Ming L.	Iran J Biotechnol. 2022 Jan 1;20(1):e3024. doi: 10.30498/ijb.2021.279942.3024. eCollection 2022 Jan.	Zhong M	Iran J Biotechnol	2022	2022/07/27	PMC9284243		10.30498/ijb.2021.279942.3024
31171858	Anaerobic hydrocarbon degradation in candidate phylum 'Atribacteria' (JS1) inferred from genomics	Liu YF, Qi ZZ, Shou LB, Liu JF, Yang SZ, Gu JD, Mu BZ.	ISME J. 2019 Sep;13(9):2377-2390. doi: 10.1038/s41396-019-0448-2. Epub 2019 Jun 6.	Liu YF	ISME J	2019	2019/06/08	PMC6776118		10.1038/s41396-019-0448-2
29630745	Toxicological and chemical studies of wastewater from hydraulic fracture and conventional shale gas wells	Crosby LM, Tatu CA, Varonka M, Charles KM, Orem WH.	Environ Toxicol Chem. 2018 Aug;37(8):2098-2111. doi: 10.1002/etc.4146. Epub 2018 Jun 11.	Crosby LM	Environ Toxicol Chem	2018	2018/04/10			10.1002/etc.4146
26835451	Carbonate Precipitation through Microbial Activities in Natural Environment, and Their Potential in Biotechnology: A Review	Zhu T, Dittrich M.	Front Bioeng Biotechnol. 2016 Jan 20;4:4. doi: 10.3389/fbioe.2016.00004. eCollection 2016.	Zhu T	Front Bioeng Biotechnol	2016	2016/02/03	PMC4718973		10.3389/fbioe.2016.00004
34898610	Investigating the role of the carbon storage regulator A (CsrA) in Leptospira spp	Phoka T, Fule L, Da Fonseca JP, Cokelaer T, Picardeau M, Patarakul K.	PLoS One. 2021 Dec 13;16(12):e0260981. doi: 10.1371/journal.pone.0260981. eCollection 2021.	Phoka T	PLoS One	2021	2021/12/13	PMC8668096		10.1371/journal.pone.0260981
29143260	Combining stable carbon isotope analysis and petroleum-fingerprinting to evaluate petroleum contamination in the Yanchang oilfield located on loess plateau in China	Wang Y, Liang J, Wang J, Gao S.	Environ Sci Pollut Res Int. 2018 Jan;25(3):2830-2841. doi: 10.1007/s11356-017-0500-6. Epub 2017 Nov 15.	Wang Y	Environ Sci Pollut Res Int	2018	2017/11/17			10.1007/s11356-017-0500-6
30337913	Mitigating Sulfidogenesis With Simultaneous Perchlorate and Nitrate Treatments	Engelbrektson A, Briseno V, Liu Y, Figueroa I, Yee M, Shao GL, Carlson H, Coates JD.	Front Microbiol. 2018 Oct 4;9:2305. doi: 10.3389/fmicb.2018.02305. eCollection 2018.	Engelbrektson A	Front Microbiol	2018	2018/10/20	PMC6180152		10.3389/fmicb.2018.02305
32629440	Reliable inkjet printing of chondrocytes and MSCs using reservoir agitation	Dudman JPR, Ferreira AM, Gentile P, Wang X, Ribeiro RDC, Benning M, Dalgarno KW.	Biofabrication. 2020 Aug 12;12(4):045024. doi: 10.1088/1758-5090/aba2f8.	Dudman JPR	Biofabrication	2020	2020/07/07			10.1088/1758-5090/aba2f8
35056515	Genetic and Comparative Genome Analysis of Exiguobacterium aurantiacum SW-20, a Petroleum-Degrading Bacteria with Salt Tolerance and Heavy Metal-Tolerance Isolated from Produced Water of Changqing Oilfield, China	Su Z, Wang S, Yang S, Yin Y, Cao Y, Li G, Ma T.	Microorganisms. 2021 Dec 29;10(1):66. doi: 10.3390/microorganisms10010066.	Su Z	Microorganisms	2021	2022/01/21	PMC8779447		10.3390/microorganisms10010066
33343524	Understanding Microbial Community Dynamics in Up-Flow Bioreactors to Improve Mitigation Strategies for Oil Souring	Dutta A, Smith B, Goldman T, Walker L, Streets M, Eden B, Dirmeier R, Bowman JS.	Front Microbiol. 2020 Dec 3;11:585943. doi: 10.3389/fmicb.2020.585943. eCollection 2020.	Dutta A	Front Microbiol	2020	2020/12/21	PMC7744764		10.3389/fmicb.2020.585943
33897673	Rock-Hosted Subsurface Biofilms: Mineral Selectivity Drives Hotspots for Intraterrestrial Life	Casar CP, Kruger BR, Osburn MR.	Front Microbiol. 2021 Apr 9;12:658988. doi: 10.3389/fmicb.2021.658988. eCollection 2021.	Casar CP	Front Microbiol	2021	2021/04/26	PMC8062869		10.3389/fmicb.2021.658988
28638372	Diversity and Composition of Sulfate-Reducing Microbial Communities Based on Genomic DNA and RNA Transcription in Production Water of High Temperature and Corrosive Oil Reservoir	Li XX, Liu JF, Zhou L, Mbadinga SM, Yang SZ, Gu JD, Mu BZ.	Front Microbiol. 2017 Jun 7;8:1011. doi: 10.3389/fmicb.2017.01011. eCollection 2017.	Li XX	Front Microbiol	2017	2017/06/23	PMC5461352		10.3389/fmicb.2017.01011
25194923	Genome sequence of Brevibacillus agri strain 5-2, isolated from the formation water of petroleum reservoir	She Y, Wu W, Hang C, Jiang X, Chai L, Yu G, Shu F, Wang Z, Su S, Xiang T, Zhang Z, Hou D, Zhang F, Zheng B.	Mar Genomics. 2014 Dec;18 Pt B:123-5. doi: 10.1016/j.margen.2014.08.006. Epub 2014 Sep 4.	She Y	Mar Genomics	2014	2014/09/08			10.1016/j.margen.2014.08.006
27367677	Subinhibitory Concentrations of Allicin Decrease Uropathogenic Escherichia coli (UPEC) Biofilm Formation, Adhesion Ability, and Swimming Motility	Yang X, Sha K, Xu G, Tian H, Wang X, Chen S, Wang Y, Li J, Chen J, Huang N.	Int J Mol Sci. 2016 Jun 29;17(7):979. doi: 10.3390/ijms17070979.	Yang X	Int J Mol Sci	2016	2016/07/02	PMC4964365		10.3390/ijms17070979
23532754	Candida albicans and non-C. albicans Candida species: comparison of biofilm production and metabolic activity in biofilms, and putative virulence properties of isolates from hospital environments and infections	Ferreira AV, Prado CG, Carvalho RR, Dias KS, Dias AL.	Mycopathologia. 2013 Apr;175(3-4):265-72. doi: 10.1007/s11046-013-9638-z. Epub 2013 Mar 27.	Ferreira AV	Mycopathologia	2013	2013/03/28			10.1007/s11046-013-9638-z
25894951	Profiling of Indigenous Microbial Community Dynamics and Metabolic Activity During Enrichment in Molasses-Supplemented Crude Oil-Brine Mixtures for Improved Understanding of Microbial Enhanced Oil Recovery	Halim AY, Pedersen DS, Nielsen SM, Lantz AE.	Appl Biochem Biotechnol. 2015 Jun;176(4):1012-28. doi: 10.1007/s12010-015-1626-y. Epub 2015 Apr 18.	Halim AY	Appl Biochem Biotechnol	2015	2015/04/21			10.1007/s12010-015-1626-y
27408680	High quality genome sequence and description of Enterobacter mori strain 5-4, isolated from a mixture of formation water and crude-oil	Zhang F, Su S, Yu G, Zheng B, Shu F, Wang Z, Xiang T, Dong H, Zhang Z, Hou D, She Y.	Stand Genomic Sci. 2015 Feb 27;10:9. doi: 10.1186/1944-3277-10-9. eCollection 2015.	Zhang F	Stand Genomic Sci	2015	2016/07/14	PMC4940761		10.1186/1944-3277-10-9
29939498	Transcriptome analysis of Porphyromonas gingivalis and Acinetobacter baumannii in polymicrobial communities	Miller DP, Wang Q, Weinberg A, Lamont RJ.	Mol Oral Microbiol. 2018 Oct;33(5):364-377. doi: 10.1111/omi.12238. Epub 2018 Aug 3.	Miller DP	Mol Oral Microbiol	2018	2018/06/26	PMC6158049	NIHMS977828	10.1111/omi.12238
32882535	The microbial community of a biofilm lining the wall of a pristine cave in Western New Guinea	Turrini P, Tescari M, Visaggio D, Pirolo M, Lugli GA, Ventura M, Frangipani E, Visca P.	Microbiol Res. 2020 Dec;241:126584. doi: 10.1016/j.micres.2020.126584. Epub 2020 Aug 22.	Turrini P	Microbiol Res	2020	2020/09/04			10.1016/j.micres.2020.126584
21866693	[Microbial metabolic characteristics and ecological controlling in petroleum reservoir--a review]	Gao P, Ma T, Liu R.	Wei Sheng Wu Xue Bao. 2011 Jun;51(6):711-7.	Gao P	Wei Sheng Wu Xue Bao	2011	2011/08/27
28942530	Propionate metabolism and diversity of relevant functional genes by in silico analysis and detection in subsurface petroleum reservoirs	Yang T, Mbadinga SM, Zhou L, Yang SZ, Liu JF, Gu JD, Mu BZ.	World J Microbiol Biotechnol. 2017 Sep 23;33(10):182. doi: 10.1007/s11274-017-2350-2.	Yang T	World J Microbiol Biotechnol	2017	2017/09/25			10.1007/s11274-017-2350-2
30851416	Deepwater Horizon crude oil exposure alters cholesterol biosynthesis with implications for developmental cardiotoxicity in larval mahi-mahi (Coryphaena hippurus)	McGruer V, Pasparakis C, Grosell M, Stieglitz JD, Benetti DD, Greer JB, Schlenk D.	Comp Biochem Physiol C Toxicol Pharmacol. 2019 Jun;220:31-35. doi: 10.1016/j.cbpc.2019.03.001. Epub 2019 Mar 6.	McGruer V	Comp Biochem Physiol C Toxicol Pharmacol	2019	2019/03/10			10.1016/j.cbpc.2019.03.001
26230048	Diverse, rare microbial taxa responded to the Deepwater Horizon deep-sea hydrocarbon plume	Kleindienst S, Grim S, Sogin M, Bracco A, Crespo-Medina M, Joye SB.	ISME J. 2016 Feb;10(2):400-15. doi: 10.1038/ismej.2015.121. Epub 2015 Jul 31.	Kleindienst S	ISME J	2016	2015/08/01	PMC4737931		10.1038/ismej.2015.121
30131358	Candida albicans Dispersed Cells Are Developmentally Distinct from Biofilm and Planktonic Cells	Uppuluri P, Acosta Zaldívar M, Anderson MZ, Dunn MJ, Berman J, Lopez Ribot JL, Köhler JR.	mBio. 2018 Aug 21;9(4):e01338-18. doi: 10.1128/mBio.01338-18.	Uppuluri P	mBio	2018	2018/08/23	PMC6106089		10.1128/mBio.01338-18
25007395	Beta- lactam antibiotics stimulate biofilm formation in non-typeable haemophilus influenzae by up-regulating carbohydrate metabolism	Wu S, Li X, Gunawardana M, Maguire K, Guerrero-Given D, Schaudinn C, Wang C, Baum MM, Webster P.	PLoS One. 2014 Jul 9;9(7):e99204. doi: 10.1371/journal.pone.0099204. eCollection 2014.	Wu S	PLoS One	2014	2014/07/10	PMC4090067		10.1371/journal.pone.0099204
26787827	Genome-Resolved Metagenomic Analysis Reveals Roles for Candidate Phyla and Other Microbial Community Members in Biogeochemical Transformations in Oil Reservoirs	Hu P, Tom L, Singh A, Thomas BC, Baker BJ, Piceno YM, Andersen GL, Banfield JF.	mBio. 2016 Jan 19;7(1):e01669-15. doi: 10.1128/mBio.01669-15.	Hu P	mBio	2016	2016/01/21	PMC4725000		10.1128/mBio.01669-15
29424055	Characterization of Swedish Campylobacter coli clade 2 and clade 3 water isolates	Nilsson A, Skarp A, Johansson C, Kaden R, Engstrand L, Rautelin H.	Microbiologyopen. 2018 Aug;7(4):e00583. doi: 10.1002/mbo3.583. Epub 2018 Feb 9.	Nilsson A	Microbiologyopen	2018	2018/02/10	PMC6079167		10.1002/mbo3.583
24238218	Halomonas sulfidaeris-dominated microbial community inhabits a 1.8 km-deep subsurface Cambrian Sandstone reservoir	Dong Y, Kumar CG, Chia N, Kim PJ, Miller PA, Price ND, Cann IK, Flynn TM, Sanford RA, Krapac IG, Locke RA 2nd, Hong PY, Tamaki H, Liu WT, Mackie RI, Hernandez AG, Wright CL, Mikel MA, Walker JL, Sivaguru M, Fried G, Yannarell AC, Fouke BW.	Environ Microbiol. 2014 Jun;16(6):1695-708. doi: 10.1111/1462-2920.12325. Epub 2013 Dec 12.	Dong Y	Environ Microbiol	2014	2013/11/19			10.1111/1462-2920.12325
32580365	Metabolic Traits of Bovine Shiga Toxin-Producing Escherichia Coli (STEC) Strains with Different Colonization Properties	Barth SA, Weber M, Schaufler K, Berens C, Geue L, Menge C.	Toxins (Basel). 2020 Jun 22;12(6):414. doi: 10.3390/toxins12060414.	Barth SA	Toxins (Basel)	2020	2020/06/26	PMC7354573		10.3390/toxins12060414
24040219	Shifts in the microbial community composition of Gulf Coast beaches following beach oiling	Newton RJ, Huse SM, Morrison HG, Peake CS, Sogin ML, McLellan SL.	PLoS One. 2013 Sep 10;8(9):e74265. doi: 10.1371/journal.pone.0074265. eCollection 2013.	Newton RJ	PLoS One	2013	2013/09/17	PMC3769389		10.1371/journal.pone.0074265
30113858	Use of Some Additives for Improving Mesenchymal Stem Cell Isolation Outcomes in Non-Mobilized Peripheral Blood	Pouryazdanpanah N, Vahidi R, Dabiri S, Derakhshani A, Farsinezhad A.	Arch Iran Med. 2018 Aug 1;21(8):362-367.	Pouryazdanpanah N	Arch Iran Med	2018	2018/08/17
34997847	Food-grade D-limonene enhanced a green biocide in the mitigation of carbon steel biocorrosion by a mixed-culture biofilm consortium	Unsal T, Wang D, Kijkla P, Kumseranee S, Punpruk S, Mohamed ME, Saleh MA, Gu T.	Bioprocess Biosyst Eng. 2022 Apr;45(4):669-678. doi: 10.1007/s00449-021-02685-6. Epub 2022 Jan 8.	Unsal T	Bioprocess Biosyst Eng	2022	2022/01/08			10.1007/s00449-021-02685-6
33647404	Co-delivery of ciprofloxacin and colistin using microcontainers for bacterial biofilm treatment	Birk SE, Mazzoni C, Mobasharah Javed M, Borre Hansen M, Krogh Johansen H, Anders Juul Haagensen J, Molin S, Hagner Nielsen L, Boisen A.	Int J Pharm. 2021 Apr 15;599:120420. doi: 10.1016/j.ijpharm.2021.120420. Epub 2021 Feb 27.	Birk SE	Int J Pharm	2021	2021/03/01			10.1016/j.ijpharm.2021.120420
30229628	[A Thermotolerant and Halotolerant Sulfate-reducing Bacterium in Produced Water from an Offshore High-temperature Oilfield in Bohai Bay, China: Isolation, Phenotypic Characterization, and Inhibition]	Yang CL, Yuan MY, Shi RJ, Yan PJ, Zhao F, Han SQ, Zhang Y.	Huan Jing Ke Xue. 2018 Oct 8;39(10):4783-4792. doi: 10.13227/j.hjkx.201802103.	Yang CL	Huan Jing Ke Xue	2018	2018/09/20			10.13227/j.hjkx.201802103
28361040	Different Phenotypes of Mature Biofilm in Flavobacterium psychrophilum Share a Potential for Virulence That Differs from Planktonic State	Levipan HA, Avendaño-Herrera R.	Front Cell Infect Microbiol. 2017 Mar 15;7:76. doi: 10.3389/fcimb.2017.00076. eCollection 2017.	Levipan HA	Front Cell Infect Microbiol	2017	2017/04/01	PMC5350093		10.3389/fcimb.2017.00076
20003355	The transcriptional programme of Salmonella enterica serovar Typhimurium reveals a key role for tryptophan metabolism in biofilms	Hamilton S, Bongaerts RJ, Mulholland F, Cochrane B, Porter J, Lucchini S, Lappin-Scott HM, Hinton JC.	BMC Genomics. 2009 Dec 11;10:599. doi: 10.1186/1471-2164-10-599.	Hamilton S	BMC Genomics	2009	2009/12/17	PMC2805695		10.1186/1471-2164-10-599
29935766	Novel magnetic nanoparticle-containing adhesive with greater dentin bond strength and antibacterial and remineralizing capabilities	Li Y, Hu X, Xia Y, Ji Y, Ruan J, Weir MD, Lin X, Nie Z, Gu N, Masri R, Chang X, Xu HHK.	Dent Mater. 2018 Sep;34(9):1310-1322. doi: 10.1016/j.dental.2018.06.001. Epub 2018 Jun 21.	Li Y	Dent Mater	2018	2018/06/25	PMC6103821	NIHMS976905	10.1016/j.dental.2018.06.001
31117935	Identification of key genes and molecular mechanisms associated with low egg production of broiler breeder hens in ad libitum	Wei Z, Li P, Huang S, Lkhagvagarav P, Zhu M, Liang C, Jia C.	BMC Genomics. 2019 May 22;20(1):408. doi: 10.1186/s12864-019-5801-3.	Wei Z	BMC Genomics	2019	2019/05/24	PMC6532148		10.1186/s12864-019-5801-3
31555903	Colombian Andean thermal springs: reservoir of thermophilic anaerobic bacteria producing hydrolytic enzymes	Rubiano-Labrador C, Díaz-Cárdenas C, López G, Gómez J, Baena S.	Extremophiles. 2019 Nov;23(6):793-808. doi: 10.1007/s00792-019-01132-5. Epub 2019 Sep 25.	Rubiano-Labrador C	Extremophiles	2019	2019/09/27			10.1007/s00792-019-01132-5
33552450	Ecological distribution and potential roles of Woesearchaeota in anaerobic biogeochemical cycling unveiled by genomic analysis	Liu X, Wang Y, Gu JD.	Comput Struct Biotechnol J. 2021 Jan 16;19:794-800. doi: 10.1016/j.csbj.2021.01.013. eCollection 2021.	Liu X	Comput Struct Biotechnol J	2021	2021/02/08	PMC7844129		10.1016/j.csbj.2021.01.013
31740197	Different metabolism of EPA, DPA and DHA in humans: A double-blind cross-over study	Guo XF, Tong WF, Ruan Y, Sinclair AJ, Li D.	Prostaglandins Leukot Essent Fatty Acids. 2020 Jul;158:102033. doi: 10.1016/j.plefa.2019.102033. Epub 2019 Nov 12.	Guo XF	Prostaglandins Leukot Essent Fatty Acids	2020	2019/11/20			10.1016/j.plefa.2019.102033
29381708	RNA-seq transcriptome analysis of the immature seeds of two Brassica napus lines with extremely different thousand-seed weight to identify the candidate genes related to seed weight	Geng X, Dong N, Wang Y, Li G, Wang L, Guo X, Li J, Wen Z, Wei W.	PLoS One. 2018 Jan 30;13(1):e0191297. doi: 10.1371/journal.pone.0191297. eCollection 2018.	Geng X	PLoS One	2018	2018/01/31	PMC5790231		10.1371/journal.pone.0191297
24847314	Natural oil slicks fuel surface water microbial activities in the northern Gulf of Mexico	Ziervogel K, D'Souza N, Sweet J, Yan B, Passow U.	Front Microbiol. 2014 May 8;5:188. doi: 10.3389/fmicb.2014.00188. eCollection 2014.	Ziervogel K	Front Microbiol	2014	2014/05/22	PMC4021148		10.3389/fmicb.2014.00188
24587220	New hydrocarbon degradation pathways in the microbial metagenome from Brazilian petroleum reservoirs	Sierra-García IN, Correa Alvarez J, de Vasconcellos SP, Pereira de Souza A, dos Santos Neto EV, de Oliveira VM.	PLoS One. 2014 Feb 26;9(2):e90087. doi: 10.1371/journal.pone.0090087. eCollection 2014.	Sierra-García IN	PLoS One	2014	2014/03/04	PMC3935994		10.1371/journal.pone.0090087
35870609	The metabolism of pyrene by a novel Altererythrobacter sp. with in-situ co-substrates: A mechanistic analysis based on pathway, genomics, and enzyme activity	Fan K, Feng Q, Li K, Lin J, Wang W, Cao Y, Gai H, Song H, Huang T, Zhu Q, Xiao M.	Chemosphere. 2022 Nov;307(Pt 1):135784. doi: 10.1016/j.chemosphere.2022.135784. Epub 2022 Jul 20.	Fan K	Chemosphere	2022	2022/07/23			10.1016/j.chemosphere.2022.135784
29981021	Novel Bacillus cereus strain from electrokinetically remediated saline soil towards the remediation of crude oil	Gao YC, Guo SH, Wang JN, Zhang W, Chen GH, Wang H, Du J, Liu Y, Naidu R.	Environ Sci Pollut Res Int. 2018 Sep;25(26):26351-26360. doi: 10.1007/s11356-018-2495-z. Epub 2018 Jul 6.	Gao YC	Environ Sci Pollut Res Int	2018	2018/07/08			10.1007/s11356-018-2495-z
22966776	Metagenomic and geochemical characterization of pockmarked sediments overlaying the Troll petroleum reservoir in the North Sea	Håvelsrud OE, Haverkamp TH, Kristensen T, Jakobsen KS, Rike AG.	BMC Microbiol. 2012 Sep 11;12:203. doi: 10.1186/1471-2180-12-203.	Håvelsrud OE	BMC Microbiol	2012	2012/09/13	PMC3478177		10.1186/1471-2180-12-203
26620082	High potential of adhesion to biotic and abiotic surfaces by opportunistic Staphylococcus aureus strains isolated from orthodontic appliances	Merghni A, Ben Nejma M, Dallel I, Tobji S, Ben Amor A, Janel S, Lafont F, Aouni M, Mastouri M.	Microb Pathog. 2016 Feb;91:61-7. doi: 10.1016/j.micpath.2015.11.009. Epub 2015 Nov 24.	Merghni A	Microb Pathog	2016	2015/12/02			10.1016/j.micpath.2015.11.009
28066376	Hydrocarbonoclastic Alcanivorax Isolates Exhibit Different Physiological and Expression Responses to n-dodecane	Barbato M, Scoma A, Mapelli F, De Smet R, Banat IM, Daffonchio D, Boon N, Borin S.	Front Microbiol. 2016 Dec 21;7:2056. doi: 10.3389/fmicb.2016.02056. eCollection 2016.	Barbato M	Front Microbiol	2016	2017/01/10	PMC5174103		10.3389/fmicb.2016.02056
22100410	Proteomics analysis of aromatic catabolic pathways in thermophilic Geobacillus thermodenitrificans NG80-2	Li Y, Wu J, Wang W, Ding P, Feng L.	J Proteomics. 2012 Feb 2;75(4):1201-10. doi: 10.1016/j.jprot.2011.10.035. Epub 2011 Nov 7.	Li Y	J Proteomics	2012	2011/11/22			10.1016/j.jprot.2011.10.035
20652442	Investigation of biosurfactant-producing indigenous microorganisms that enhance residue oil recovery in an oil reservoir after polymer flooding	She YH, Zhang F, Xia JJ, Kong SQ, Wang ZL, Shu FC, Hu JM.	Appl Biochem Biotechnol. 2011 Jan;163(2):223-34. doi: 10.1007/s12010-010-9032-y. Epub 2010 Jul 22.	She YH	Appl Biochem Biotechnol	2011	2010/07/24			10.1007/s12010-010-9032-y
16874371	Automated MEMS-based Drosophila embryo injection system for high-throughput RNAi screens	Zappe S, Fish M, Scott MP, Solgaard O.	Lab Chip. 2006 Aug;6(8):1012-9. doi: 10.1039/b600238b. Epub 2006 Jun 8.	Zappe S	Lab Chip	2006	2006/07/29			10.1039/b600238b
28356216	Novel dental adhesive with triple benefits of calcium phosphate recharge, protein-repellent and antibacterial functions	Xie X, Wang L, Xing D, Zhang K, Weir MD, Liu H, Bai Y, Xu HHK.	Dent Mater. 2017 May;33(5):553-563. doi: 10.1016/j.dental.2017.03.002. Epub 2017 Mar 27.	Xie X	Dent Mater	2017	2017/03/31			10.1016/j.dental.2017.03.002
9868623	Cross-contamination potential of saliva ejectors used in dentistry	Barbeau J, ten Bokum L, Gauthier C, Prévost AP.	J Hosp Infect. 1998 Dec;40(4):303-11. doi: 10.1016/s0195-6701(98)90308-5.	Barbeau J	J Hosp Infect	1998	1998/12/30			10.1016/s0195-6701(98)90308-5
28571861	High-throughput metagenomic analysis of petroleum-contaminated soil microbiome reveals the versatility in xenobiotic aromatics metabolism	Bao YJ, Xu Z, Li Y, Yao Z, Sun J, Song H.	J Environ Sci (China). 2017 Jun;56:25-35. doi: 10.1016/j.jes.2016.08.022. Epub 2016 Oct 1.	Bao YJ	J Environ Sci (China)	2017	2017/06/03			10.1016/j.jes.2016.08.022
33843741	Bioremediation of various aromatic and emerging pollutants by Bacillus cereus sp. isolated from petroleum sludge	Alhefeiti MA, Athamneh K, Vijayan R, Ashraf SS.	Water Sci Technol. 2021 Apr;83(7):1535-1547. doi: 10.2166/wst.2021.065.	Alhefeiti MA	Water Sci Technol	2021	2021/04/12			10.2166/wst.2021.065
24720222	[Inhibition of the activity of sulfate-reducing bacteria in produced water from oil reservoir by nitrate]	Yang DY, Zhang Y, Shi RJ, Han SQ, Li GZ, Li GQ, Zhao JY.	Huan Jing Ke Xue. 2014 Jan;35(1):319-26.	Yang DY	Huan Jing Ke Xue	2014	2014/04/12
28994006	Isolation and complete genome sequence of Halorientalis hydrocarbonoclasticus sp. nov., a hydrocarbon-degrading haloarchaeon	Zhao D, Kumar S, Zhou J, Wang R, Li M, Xiang H.	Extremophiles. 2017 Nov;21(6):1081-1090. doi: 10.1007/s00792-017-0968-5. Epub 2017 Oct 9.	Zhao D	Extremophiles	2017	2017/10/11			10.1007/s00792-017-0968-5
20593026	Can preening contribute to influenza A virus infection in wild waterbirds?	Delogu M, De Marco MA, Di Trani L, Raffini E, Cotti C, Puzelli S, Ostanello F, Webster RG, Cassone A, Donatelli I.	PLoS One. 2010 Jun 25;5(6):e11315. doi: 10.1371/journal.pone.0011315.	Delogu M	PLoS One	2010	2010/07/02	PMC2892510		10.1371/journal.pone.0011315
22701624	Proteomic analysis of Neisseria gonorrhoeae biofilms shows shift to anaerobic respiration and changes in nutrient transport and outermembrane proteins	Phillips NJ, Steichen CT, Schilling B, Post DM, Niles RK, Bair TB, Falsetta ML, Apicella MA, Gibson BW.	PLoS One. 2012;7(6):e38303. doi: 10.1371/journal.pone.0038303. Epub 2012 Jun 6.	Phillips NJ	PLoS One	2012	2012/06/16	PMC3368942		10.1371/journal.pone.0038303
36311368	Evidencing the role of carbonic anhydrase in the formation of carbonate minerals by bacterial strains isolated from extreme environments in Qatar	Abdelsamad R, Al Disi Z, Abu-Dieyeh M, Al-Ghouti MA, Zouari N.	Heliyon. 2022 Oct 20;8(10):e11151. doi: 10.1016/j.heliyon.2022.e11151. eCollection 2022 Oct.	Abdelsamad R	Heliyon	2022	2022/10/31	PMC9614864		10.1016/j.heliyon.2022.e11151
30205236	Effects of dietary lipid sources on hepatic nutritive contents, fatty acid composition and proteome of Nile tilapia (Oreochromis niloticus)	Boonanuntanasarn S, Nakharuthai C, Schrama D, Duangkaew R, Rodrigues PM.	J Proteomics. 2019 Feb 10;192:208-222. doi: 10.1016/j.jprot.2018.09.003. Epub 2018 Sep 8.	Boonanuntanasarn S	J Proteomics	2019	2018/09/12			10.1016/j.jprot.2018.09.003
32912577	Molecular interaction between methicillin-resistant Staphylococcus aureus (MRSA) and chicken breast reveals enhancement of pathogenesis and toxicity for food-borne outbreak	Chung HY, Kim YT, Kwon JG, Im HH, Ko D, Lee JH, Choi SH.	Food Microbiol. 2021 Feb;93:103602. doi: 10.1016/j.fm.2020.103602. Epub 2020 Jul 24.	Chung HY	Food Microbiol	2021	2020/09/11			10.1016/j.fm.2020.103602
28102347	Low-level predation by lytic phage phiIPLA-RODI promotes biofilm formation and triggers the stringent response in Staphylococcus aureus	Fernández L, González S, Campelo AB, Martínez B, Rodríguez A, García P.	Sci Rep. 2017 Jan 19;7:40965. doi: 10.1038/srep40965.	Fernández L	Sci Rep	2017	2017/01/20	PMC5244418		10.1038/srep40965
27548979	[Phytoremediation of Petroleum Contaminated Soils with Iris pseudacorus L. and the Metabolic Analysis in Roots]	Wang YN, Cheng LJ, Zhou QX.	Huan Jing Ke Xue. 2016 Apr 15;37(4):1531-8.	Wang YN	Huan Jing Ke Xue	2016	2016/08/24
23761789	In situ detection of anaerobic alkane metabolites in subsurface environments	Agrawal A, Gieg LM.	Front Microbiol. 2013 Jun 4;4:140. doi: 10.3389/fmicb.2013.00140. eCollection 2013.	Agrawal A	Front Microbiol	2013	2013/06/14	PMC3671572		10.3389/fmicb.2013.00140
31987701	Candidatus Mcinerneyibacterium aminivorans gen. nov., sp. nov., the first representative of the candidate phylum Mcinerneyibacteriota phyl. nov. recovered from a high temperature, high salinity tertiary oil reservoir in north central Oklahoma, USA	Yadav A, Vilcáez J, Farag IF, Johnson B, Mueller K, Youssef NH, Elshahed MS.	Syst Appl Microbiol. 2020 Mar;43(2):126057. doi: 10.1016/j.syapm.2020.126057. Epub 2020 Jan 22.	Yadav A	Syst Appl Microbiol	2020	2020/01/29			10.1016/j.syapm.2020.126057
30515178	Transcriptome Analysis of Oleoresin-Producing Tree Sindora Glabra and Characterization of Sesquiterpene Synthases	Yu N, Yang JC, Yin GT, Li RS, Zou WT.	Front Plant Sci. 2018 Nov 20;9:1619. doi: 10.3389/fpls.2018.01619. eCollection 2018.	Yu N	Front Plant Sci	2018	2018/12/06	PMC6256070		10.3389/fpls.2018.01619
22799216	[A new method of microbial prospecting for oil and gas based on BIOLOG metabolic fingerprinting analysis]	Liao X, Zhang T, Zeng J, Sun J, Hu W, Lou K.	Wei Sheng Wu Xue Bao. 2012 Apr 4;52(4):505-11.	Liao X	Wei Sheng Wu Xue Bao	2012	2012/07/18
8868233	Characterization of sulfate-reducing bacteria isolated from oil-field waters	Tardy-Jacquenod C, Caumette P, Matheron R, Lanau C, Arnauld O, Magot M.	Can J Microbiol. 1996 Mar;42(3):259-66. doi: 10.1139/m96-038.	Tardy-Jacquenod C	Can J Microbiol	1996	1996/03/01			10.1139/m96-038
31877868	Grease Waste as a Reservoir of Lipase-Producing Yeast and Description of Limtongella siamensis gen. nov., sp. nov	Sakpuntoon V, Angchuan J, Boontham W, Khunnamwong P, Boonmak C, Srisuk N.	Microorganisms. 2019 Dec 22;8(1):27. doi: 10.3390/microorganisms8010027.	Sakpuntoon V	Microorganisms	2019	2019/12/28	PMC7023220		10.3390/microorganisms8010027
28070486	Genome sequencing and annotation of Geobacillus sp. 1017, a hydrocarbon-oxidizing thermophilic bacterium isolated from a heavy oil reservoir (China)	Kadnikov VV, Mardanov AV, Poltaraus AB, Sokolova DS, Semenova EM, Ravin NV, Tourova TP, Nazina TN.	Genom Data. 2016 Dec 29;11:95-97. doi: 10.1016/j.gdata.2016.12.011. eCollection 2017 Mar.	Kadnikov VV	Genom Data	2016	2017/01/11	PMC5219642		10.1016/j.gdata.2016.12.011
17720845	Detection of Escherichia coli in biofilms from pipe samples and coupons in drinking water distribution networks	Juhna T, Birzniece D, Larsson S, Zulenkovs D, Sharipo A, Azevedo NF, Ménard-Szczebara F, Castagnet S, Féliers C, Keevil CW.	Appl Environ Microbiol. 2007 Nov;73(22):7456-64. doi: 10.1128/AEM.00845-07. Epub 2007 Aug 24.	Juhna T	Appl Environ Microbiol	2007	2007/08/28	PMC2168204		10.1128/AEM.00845-07
30416532	N-Acetylcysteine (NAC) Ameliorates Lipid-Related Metabolic Dysfunction in Bone Marrow Stromal Cells-Derived Adipocytes	Raffaele M, Barbagallo I, Licari M, Carota G, Sferrazzo G, Spampinato M, Sorrenti V, Vanella L.	Evid Based Complement Alternat Med. 2018 Oct 17;2018:5310961. doi: 10.1155/2018/5310961. eCollection 2018.	Raffaele M	Evid Based Complement Alternat Med	2018	2018/11/13	PMC6207898		10.1155/2018/5310961
20831274	Polyelectrolyte multilayers fabricated from antifungal β-peptides: design of surfaces that exhibit antifungal activity against Candida albicans	Karlsson AJ, Flessner RM, Gellman SH, Lynn DM, Palecek SP.	Biomacromolecules. 2010 Sep 13;11(9):2321-8. doi: 10.1021/bm100424s.	Karlsson AJ	Biomacromolecules	2010	2010/09/14	PMC2939741	NIHMS225486	10.1021/bm100424s
25701713	Dorsomedial hindbrain catecholamine regulation of hypothalamic astrocyte glycogen metabolic enzyme protein expression: Impact of estradiol	Tamrakar P, Shrestha PK, Briski KP.	Neuroscience. 2015 Apr 30;292:34-45. doi: 10.1016/j.neuroscience.2015.02.019. Epub 2015 Feb 18.	Tamrakar P	Neuroscience	2015	2015/02/22			10.1016/j.neuroscience.2015.02.019
15023962	Isolation from oil reservoirs of novel thermophilic anaerobes phylogenetically related to Thermoanaerobacter subterraneus: reassignment of T. subterraneus, Thermoanaerobacter yonseiensis, Thermoanaerobacter tengcongensis and Carboxydibrachium pacificum to Caldanaerobacter subterraneus gen. nov., sp. nov., comb. nov. as four novel subspecies	Fardeau ML, Salinas MB, L'Haridon S, Jeanthon C, Verhé F, Cayol JL, Patel BKC, Garcia JL, Ollivier B.	Int J Syst Evol Microbiol. 2004 Mar;54(Pt 2):467-474. doi: 10.1099/ijs.0.02711-0.	Fardeau ML	Int J Syst Evol Microbiol	2004	2004/03/17			10.1099/ijs.0.02711-0
26819653	Draft genome sequence of Paenibacillus sp. strain A2	Zheng B, Zhang F, Dong H, Chai L, Shu F, Yi S, Wang Z, Cui Q, Dong H, Zhang Z, Hou D, Yang J, She Y.	Stand Genomic Sci. 2016 Jan 26;11:9. doi: 10.1186/s40793-015-0125-7. eCollection 2016.	Zheng B	Stand Genomic Sci	2016	2016/01/29	PMC4728784		10.1186/s40793-015-0125-7
19762643	A constant flux of diverse thermophilic bacteria into the cold Arctic seabed	Hubert C, Loy A, Nickel M, Arnosti C, Baranyi C, Brüchert V, Ferdelman T, Finster K, Christensen FM, Rosa de Rezende J, Vandieken V, Jørgensen BB.	Science. 2009 Sep 18;325(5947):1541-4. doi: 10.1126/science.1174012.	Hubert C	Science	2009	2009/09/19			10.1126/science.1174012
3571958	Rat uterine microbiochemistry: metabolic enzyme activities stimulated by 17-beta-estradiol are localized in epithelial cells	Holt JP Jr, Rhe E.	J Histochem Cytochem. 1987 Jun;35(6):657-62. doi: 10.1177/35.6.3571958.	Holt JP Jr	J Histochem Cytochem	1987	1987/06/01			10.1177/35.6.3571958
28076651	Controlled release of chlorhexidine from a mesoporous silica-containing macroporous titanium dental implant prevents microbial biofilm formation	De Cremer K, Braem A, Gerits E, De Brucker K, Vandamme K, Martens JA, Michiels J, Vleugels J, Cammue BP, Thevissen K.	Eur Cell Mater. 2017 Jan 11;33:13-27. doi: 10.22203/eCM.v033a02.	De Cremer K	Eur Cell Mater	2017	2017/01/12			10.22203/eCM.v033a02
17452220	Effect of fish oil supplementation on fatty acid status, coordination, and fine motor skills in children with phenylketonuria	Beblo S, Reinhardt H, Demmelmair H, Muntau AC, Koletzko B.	J Pediatr. 2007 May;150(5):479-84. doi: 10.1016/j.jpeds.2006.12.011.	Beblo S	J Pediatr	2007	2007/04/25			10.1016/j.jpeds.2006.12.011
31320436	Draft Genome Sequence of Geotoga petraea Strain HO-Geo1, Isolated from a Petroleum Reservoir in Russia	Grouzdev DS, Semenova EM, Sokolova DS, Tourova TP, Poltaraus AB, Nazina TN.	Microbiol Resour Announc. 2019 Jul 18;8(29):e00706-19. doi: 10.1128/MRA.00706-19.	Grouzdev DS	Microbiol Resour Announc	2019	2019/07/20	PMC6639626		10.1128/MRA.00706-19
22768366	Genome sequence of the moderately thermophilic, amino-acid-degrading and sulfur-reducing bacterium Thermovirga lienii type strain (Cas60314(T))	Göker M, Saunders E, Lapidus A, Nolan M, Lucas S, Hammon N, Deshpande S, Cheng JF, Han C, Tapia R, Goodwin LA, Pitluck S, Liolios K, Mavromatis K, Pagani I, Ivanova N, Mikhailova N, Pati A, Chen A, Palaniappan K, Land M, Chang YJ, Jeffries CD, Brambilla EM, Rohde M, Spring S, Detter JC, Woyke T, Bristow J, Eisen JA, Markowitz V, Hugenholtz P, Kyrpides NC, Klenk HP.	Stand Genomic Sci. 2012 May 25;6(2):230-9. doi: 10.4056/sigs.2726028. Epub 2012 May 4.	Göker M	Stand Genomic Sci	2012	2012/07/07	PMC3387794		10.4056/sigs.2726028
33919946	Structural Insights into the Methane-Generating Enzyme from a Methoxydotrophic Methanogen Reveal a Restrained Gallery of Post-Translational Modifications	Kurth JM, Müller MC, Welte CU, Wagner T.	Microorganisms. 2021 Apr 14;9(4):837. doi: 10.3390/microorganisms9040837.	Kurth JM	Microorganisms	2021	2021/04/30	PMC8070964		10.3390/microorganisms9040837
24373916	Modification of rock/fluid and fluid/fluid interfaces during MEOR processes, using two biosurfactant producing strains of Bacillus stearothermophilus SUCPM#14 and Enterobacter cloacae: a mechanistic study	Sarafzadeh P, Zeinolabedini Hezave A, Mohammadi S, Niazi A, Ayatollahi S.	Colloids Surf B Biointerfaces. 2014 May 1;117:457-65. doi: 10.1016/j.colsurfb.2013.12.002. Epub 2013 Dec 7.	Sarafzadeh P	Colloids Surf B Biointerfaces	2014	2013/12/31			10.1016/j.colsurfb.2013.12.002
22384595	[Carbon source utilization characteristics of microbial communities in a petroleum-contaminated soil in Daqing Oil Field, Northeast China]	Yue BB, Li X, Ren FF, Meng FJ, Yin PD, Zhang HH, Sun GY.	Ying Yong Sheng Tai Xue Bao. 2011 Dec;22(12):3259-64.	Yue BB	Ying Yong Sheng Tai Xue Bao	2011	2012/03/06
24225588	Isolation and characterization of a novel phenanthrene (PHE) degrading strain Psuedomonas sp. USTB-RU from petroleum contaminated soil	Masakorala K, Yao J, Cai M, Chandankere R, Yuan H, Chen H.	J Hazard Mater. 2013 Dec 15;263 Pt 2:493-500. doi: 10.1016/j.jhazmat.2013.10.007. Epub 2013 Oct 12.	Masakorala K	J Hazard Mater	2013	2013/11/15			10.1016/j.jhazmat.2013.10.007
31951842	Enhanced removal of veterinary antibiotic from wastewater by photoelectroactive biofilm of purple anoxygenic phototroph through photosynthetic electron uptake	Sun J, Yang P, Huang S, Li N, Zhang Y, Yuan Y, Lu X.	Sci Total Environ. 2020 Apr 15;713:136605. doi: 10.1016/j.scitotenv.2020.136605. Epub 2020 Jan 9.	Sun J	Sci Total Environ	2020	2020/01/18			10.1016/j.scitotenv.2020.136605
16579447	[Phylogenetic diversity and activity of anaerobic microorganisms of high-temperature horizons of the Dagang Oilfield (China)]	Nazina TN, Shestakova NM, Grigor'ian AA, Mikhaĭlova EM, Turova TP, Poltaraus AB, Feng C, Ni F, Beliaev SS.	Mikrobiologiia. 2006 Jan-Feb;75(1):70-81.	Nazina TN	Mikrobiologiia	2006	2006/04/04
19560152	Stability of binary and ternary model oil-field particle suspensions: a multivariate analysis approach	Dudásová D, Rune Flåten G, Sjöblom J, Øye G.	J Colloid Interface Sci. 2009 Sep 15;337(2):464-71. doi: 10.1016/j.jcis.2009.05.068. Epub 2009 Jun 3.	Dudásová D	J Colloid Interface Sci	2009	2009/06/30			10.1016/j.jcis.2009.05.068
33239468	Draft Genome Sequence of Halomonas titanicae Strain TAT1, a Hydrocarbon-Oxidizing Halophilic Bacterium Isolated from a Petroleum Reservoir in Russia	Grouzdev DS, Sokolova DS, Poltaraus AB, Nazina TN.	Microbiol Resour Announc. 2020 Nov 25;9(48):e01255-20. doi: 10.1128/MRA.01255-20.	Grouzdev DS	Microbiol Resour Announc	2020	2020/11/26	PMC7686426		10.1128/MRA.01255-20
32389295	Insight into a highly polymorphic endophyte isolated from the roots of the halophytic seepweed Suaeda salsa: Laburnicola rhizohalophila sp. nov. (Didymosphaeriaceae, Pleosporales)	Yuan Z, Druzhinina IS, Wang X, Zhang X, Peng L, Labbé J.	Fungal Biol. 2020 May;124(5):327-337. doi: 10.1016/j.funbio.2019.10.001. Epub 2019 Oct 16.	Yuan Z	Fungal Biol	2020	2020/05/12			10.1016/j.funbio.2019.10.001
29281371	Energetics of the Ventilatory Piston Pump of the Lugworm, a Deposit-feeding Polychaete Living in a Burrow	Toulmond A, Dejours P.	Biol Bull. 1994 Apr;186(2):213-220. doi: 10.2307/1542055.	Toulmond A	Biol Bull	1994	2017/12/28			10.2307/1542055
18516485	Assessing the potential risk of oil-field produced waters using a battery of bioassays/biomarkers	Li J, Ma M, Cui Q, Wang Z.	Bull Environ Contam Toxicol. 2008 Jun;80(6):492-6. doi: 10.1007/s00128-008-9465-y. Epub 2008 May 31.	Li J	Bull Environ Contam Toxicol	2008	2008/06/03			10.1007/s00128-008-9465-y
28973729	Inexpensive metagenomic DNA extraction protocol with high quality from marine sediments contaminated by petroleum hydrocarbons	García-Bautista I, Toledano-Thompson T, Dantán-González E, González-Montilla J, Valdez-Ojeda R.	Genet Mol Res. 2017 Sep 21;16(3). doi: 10.4238/gmr16039743.	García-Bautista I	Genet Mol Res	2017	2017/10/04			10.4238/gmr16039743
35630363	Genomic Analysis of Endophytic Bacillus-Related Strains Isolated from the Medicinal Plant Origanum vulgare L. Revealed the Presence of Metabolic Pathways Involved in the Biosynthesis of Bioactive Compounds	Semenzato G, Alonso-Vásquez T, Del Duca S, Vassallo A, Riccardi C, Zaccaroni M, Mucci N, Padula A, Emiliani G, Palumbo Piccionello A, Puglia AM, Fani R.	Microorganisms. 2022 Apr 27;10(5):919. doi: 10.3390/microorganisms10050919.	Semenzato G	Microorganisms	2022	2022/05/28	PMC9145963		10.3390/microorganisms10050919
18546419	Improved reactor performance and operability in the biotransformation of carveol to carvone using a solid-liquid two-phase partitioning bioreactor	Morrish JL, Daugulis AJ.	Biotechnol Bioeng. 2008 Dec 1;101(5):946-56. doi: 10.1002/bit.21957.	Morrish JL	Biotechnol Bioeng	2008	2008/06/12			10.1002/bit.21957
30722456	Fevillea trilobata as a Natural Host of Zucchini yellow mosaic virus in Brazil	Boiteux LS, Spadotti DMA, Rezende JAM, Kitajima EW.	Plant Dis. 2013 Sep;97(9):1261. doi: 10.1094/PDIS-04-13-0351-PDN.	Boiteux LS	Plant Dis	2013	2019/02/07			10.1094/PDIS-04-13-0351-PDN
11379893	Antifungal resistance of candidal biofilms formed on denture acrylic in vitro	Chandra J, Mukherjee PK, Leidich SD, Faddoul FF, Hoyer LL, Douglas LJ, Ghannoum MA.	J Dent Res. 2001 Mar;80(3):903-8. doi: 10.1177/00220345010800031101.	Chandra J	J Dent Res	2001	2001/05/31			10.1177/00220345010800031101
27506056	[Rhizospheric Mechanisms of Hemerocallis middendorfii Trautv. et Mey. Remediating Petroleum-contaminated Soil and Metabonomic Analyses of the Root Systems]	Wang YN, Cheng LJ, Zhou QX.	Huan Jing Ke Xue. 2016 May 15;37(5):1978-85.	Wang YN	Huan Jing Ke Xue	2016	2016/08/11
2138861	Are the n-3 fatty acids from dietary fish oil deposited in the triglyceride stores of adipose tissue?	Lin DS, Conner WE.	Am J Clin Nutr. 1990 Apr;51(4):535-9. doi: 10.1093/ajcn/51.4.535.	Lin DS	Am J Clin Nutr	1990	1990/04/01			10.1093/ajcn/51.4.535
21304695	Permanent draft genome sequence of Dethiosulfovibrio peptidovorans type strain (SEBR 4207)	Labutti K, Mayilraj S, Clum A, Lucas S, Glavina Del Rio T, Nolan M, Tice H, Cheng JF, Pitluck S, Liolios K, Ivanova N, Mavromatis K, Mikhailova N, Pati A, Goodwin L, Chen A, Palaniappan K, Land M, Hauser L, Chang YJ, Jeffries CD, Rohde M, Spring S, Göker M, Woyke T, Bristow J, Eisen JA, Markowitz V, Hugenholtz P, Kyrpides NC, Klenk HP, Lapidus A.	Stand Genomic Sci. 2010 Aug 20;3(1):85-92. doi: 10.4056/sigs.1092865.	Labutti K	Stand Genomic Sci	2010	2011/02/10	PMC3035263		10.4056/sigs.1092865
31289702	Evaluation of extracellular polymeric substances extracted from waste activated sludge as a renewable corrosion inhibitor	Go LC, Holmes W, Depan D, Hernandez R.	PeerJ. 2019 Jun 26;7:e7193. doi: 10.7717/peerj.7193. eCollection 2019.	Go LC	PeerJ	2019	2019/07/11	PMC6599447		10.7717/peerj.7193
31320421	Draft Genome Sequence of a Fermenting Bacterium, Soehngenia sp. Strain 1933P, Isolated from a Petroleum Reservoir in Azerbaijan	Grouzdev DS, Bidzhieva SK, Sokolova DS, Tourova TP, Poltaraus AB, Nazina TN.	Microbiol Resour Announc. 2019 Jul 18;8(29):e00689-19. doi: 10.1128/MRA.00689-19.	Grouzdev DS	Microbiol Resour Announc	2019	2019/07/20	PMC6639623		10.1128/MRA.00689-19
11115876	A new set of Arabidopsis expressed sequence tags from developing seeds. The metabolic pathway from carbohydrates to seed oil	White JA, Todd J, Newman T, Focks N, Girke T, de Ilárduya OM, Jaworski JG, Ohlrogge JB, Benning C.	Plant Physiol. 2000 Dec;124(4):1582-94. doi: 10.1104/pp.124.4.1582.	White JA	Plant Physiol	2000	2000/12/15	PMC59857		10.1104/pp.124.4.1582
580293	Measurement of metabolites in single preimplantation embryos; a new means to study metabolic control in early embryos	Barbehenn EK, Wales RG, Lowry OH.	J Embryol Exp Morphol. 1978 Feb;43:29-46.	Barbehenn EK	J Embryol Exp Morphol	1978	1978/02/01
12587015	NTP Toxicology and Carcinogenesis Studies of Nitromethane (CAS No. 75-52-5) in F344/N Rats and B6C3F1 Mice (Inhalation Studies)	National Toxicology Program.	Natl Toxicol Program Tech Rep Ser. 1997 Feb;461:1-289.	National Toxicology Program	Natl Toxicol Program Tech Rep Ser	1997	1997/02/01
