# Supplementary material for: Metabolically Active Microbial Communities in Oilfields: A Systematic Review and Synthesis of RNA Preservation, Extraction, and Sequencing Methods
Source: MDPI journal article supplement (doi:10.3390/applmicrobiol3040079), 2023-10-06
Supplement: s1 [file s1 › Table S1. script format_input_pubmed.xlsx]

## Sheet: Detail
Item	Title	Year	DOI	Document Type	Language	Cited By	Author(s)
1	Lipid Droplet-Derived Monounsaturated Fatty Acids Traffic via PLIN5 to Allosterically Activate SIRT1	2020	10.1016/j.molcel.2019.12.003				Najt CP, Khan SA, Heden TD, Witthuhn BA, Perez M, Heier JL, Mead LE, Franklin MP, Karanja KK, Graham MJ, Mashek MT, Bernlohr DA, Parker L, Chow LS, Mashek DG.
2	Transport and transcriptional regulation of oil production in plants	2017	10.1080/07388551.2016.1212185				Manan S, Chen B, She G, Wan X, Zhao J.
3	Bacterial and archaeal diversity in oil fields and reservoirs and their potential role in hydrocarbon recovery and bioprospecting	2021	10.1007/s11356-020-11705-z				Singh NK, Choudhary S.
4	Isoprenoid Metabolism and Engineering in Glandular Trichomes of Lamiaceae	2021	10.3389/fpls.2021.699157				Mahmoud SS, Maddock S, Adal AM.
5	Metabolic capability and in situ activity of microorganisms in an oil reservoir	2018	10.1186/s40168-017-0392-1				Liu YF, Galzerani DD, Mbadinga SM, Zaramela LS, Gu JD, Mu BZ, Zengler K.
6	Potential applications of microbial enhanced oil recovery to heavy oil	2020	10.1080/07388551.2020.1739618				Zhang J, Gao H, Xue Q.
7	Bathiapeptides: Polythiazole-Containing Peptides from a Marine Biofilm-Derived Bacillus sp	2022	10.1021/acs.jnatprod.2c00290				Wu C, Tang J, Limlingan Malit JJ, Wang R, Sung HH, Williams ID, Qian PY.
8	The Diverse Roles of the Global Transcriptional Regulator PhoP in the Lifecycle of Yersinia pestis	2020	10.3390/pathogens9121039				Fukuto HS, Viboud GI, Vadyvaloo V.
9	Succession in the petroleum reservoir microbiome through an oil field production lifecycle	2017	10.1038/ismej.2017.78				Vigneron A, Alsop EB, Lomans BP, Kyrpides NC, Head IM, Tsesmetzis N.
10	Characterizing the microbiome in petroleum reservoir flooded by different water sources	2019	10.1016/j.scitotenv.2018.10.410				Wang X, Li X, Yu L, Huang L, Xiu J, Lin W, Zhang Y.
11	Diversity of Metabolically Active Bacteria in Water-Flooded High-Temperature Heavy Oil Reservoir	2017	10.3389/fmicb.2017.00707				Nazina TN, Shestakova NM, Semenova EM, Korshunova AV, Kostrukova NK, Tourova TP, Min L, Feng Q, Poltaraus AB.
12	Methanogenic Hydrocarbon Degradation: Evidence from Field and Laboratory Studies	2016	10.1159/000441679				Jiménez N, Richnow HH, Vogt C, Treude T, Krüger M.
13	Microbial processes in oil fields: culprits, problems, and opportunities	2009	10.1016/s0065-2164(08)00806-x				Youssef N, Elshahed MS, McInerney MJ.
14	Microbial abundance and community composition influence production performance in a low-temperature petroleum reservoir	2014	10.1021/es500239w				Li G, Gao P, Wu Y, Tian H, Dai X, Wang Y, Cui Q, Zhang H, Pan X, Dong H, Ma T.
15	Metagenomic Investigation of a Low Diversity, High Salinity Offshore Oil Reservoir	2021	10.3390/microorganisms9112266				Scheffer G, Hubert CRJ, Enning DR, Lahme S, Mand J, de Rezende JR.
16	Crude oil degradation by bacterial consortia under four different redox and temperature conditions	2015	10.1007/s00253-014-6042-7				Xiong S, Li X, Chen J, Zhao L, Zhang H, Zhang X.
17	Biotechnological Applications of Microbial (Per)chlorate Reduction	2017	10.3390/microorganisms5040076				Wang O, Coates JD.
18	Phylogenetic analysis of the microbial community in hypersaline petroleum produced water from the Campos Basin	2014	10.1007/s11356-014-3155-6				Piubeli F, Grossman MJ, Fantinatti-Garboggini F, Durrant LR.
19	Nutrient Level Determines Biofilm Characteristics and Subsequent Impact on Microbial Corrosion and Biocide Effectiveness	2020	10.1128/aem.02885-19				Salgar-Chaparro SJ, Lepkova K, Pojtanabuntoeng T, Darwin A, Machuca LL.
20	Complementary Microorganisms in Highly Corrosive Biofilms from an Offshore Oil Production Facility	2016	10.1128/aem.03842-15				Vigneron A, Alsop EB, Chambers B, Lomans BP, Head IM, Tsesmetzis N.
21	Recent advances in petroleum microbiology	2003	10.1128/mmbr.67.4.503-549.2003				Van Hamme JD, Singh A, Ward OP.
22	Microbial diversity and abundance in the Xinjiang Luliang long-term water-flooding petroleum reservoir	2015	10.1002/mbo3.241				Gao P, Tian H, Li G, Sun H, Ma T.
23	Metabolomics reveals primary response of wheat (Triticum aestivum) to irrigation with oilfield produced water	2022	10.1016/j.envres.2022.113547				Sedlacko EM, Heuberger AL, Chaparro JM, Cath TY, Higgins CP.
24	The Microbial Community and Functional Potential in the Midland Basin Reveal a Community Dominated by Both Thiosulfate and Sulfate-Reducing Microorganisms	2022	10.1128/spectrum.00049-22				Tinker K, Lipus D, Gardiner J, Stuckman M, Gulliver D.
25	Vertical response of microbial community and degrading genes to petroleum hydrocarbon contamination in saline alkaline soil	2019	10.1016/j.jes.2019.02.001				Liu Q, Tang J, Liu X, Song B, Zhen M, Ashbolt NJ.
26	Culture-dependent and culture-independent methods reveal microbe-clay mineral interactions by dissimilatory iron-reducing bacteria in an integral oilfield	2022	10.1016/j.scitotenv.2022.156577				Dong H, Zhang F, Xu T, Liu Y, Du Y, Wang C, Liu T, Gao J, He Y, Wang X, Sun S, She Y.
27	Role of thermophilic bacteria (Bacillus and Geobacillus) on crude oil degradation and biocorrosion in oil reservoir environment	2019	10.1007/s13205-019-1604-0				Elumalai P, Parthipan P, Narenkumar J, Anandakumar B, Madhavan J, Oh BT, Rajasekar A.
28	Extensive Horizontal Gene Transfer within and between Species of Coagulase-Negative Staphylococcus	2021	10.1093/gbe/evab206				Smith JT, Andam CP.
29	Fungal Community, Metabolic Diversity, and Glomalin-Related Soil Proteins (GRSP) Content in Soil Contaminated With Crude Oil After Long-Term Natural Bioremediation	2020	10.3389/fmicb.2020.572314				Gałązka A, Grządziel J, Gałązka R, Gawryjołek K, Ukalska-Jaruga A, Smreczak B.
30	Methanogens Within a High Salinity Oil Reservoir From the Gulf of Mexico	2020	10.3389/fmicb.2020.570714				Christman GD, León-Zayas RI, Summers ZM, Biddle JF.
31	Assessment of bioremediation potential of petroleum-contaminated soils from the shanbei oilfield of China revealed by qPCR and high throughput sequencing	2022	10.1016/j.chemosphere.2022.136446				Wu M, Liu Z, Gao H, Gao J, Xu Y, Ou Y.
32	A cost-effective and environmentally sustainable process for phycoremediation of oil field formation water for its safe disposal and reuse	2019	10.1038/s41598-019-51806-5				Das B, Deka S.
33	Dental biofilm of symptomatic COVID-19 patients harbours SARS-CoV-2	2021	10.1111/jcpe.13471				Gomes SC, Fachin S, da Fonseca JG, Angst PDM, Lamers ML, da Silva ISB, Nunes LN.
34	Characterization of microbial response to petroleum hydrocarbon contamination in a lacustrine ecosystem	2021	10.1007/s11356-021-13885-8				D'Ugo E, Bruno M, Mukherjee A, Chattopadhyay D, Giuseppetti R, De Pace R, Magurano F.
35	Genomics and simulated laboratory studies reveal Thermococcus sp. 101C5 as a novel hyperthermophilic archaeon possessing a specialized metabolic arsenal for enhanced oil recovery	2022	10.1007/s10482-021-01667-8				Kapse NG, Paliwal V, Dagar SS, Rana DP, Dhakephalkar PK.
36	Study on bioadsorption and biodegradation of petroleum hydrocarbons by a microbial consortium	2013	10.1016/j.biortech.2013.09.024				Xu N, Bao M, Sun P, Li Y.
37	Ammonium removal from high-salinity oilfield-produced water: assessing the microbial community dynamics at increasing salt concentrations	2017	10.1007/s00253-016-7902-0				Quartaroli L, Silva LC, Silva CM, Lima HS, de Paula SO, de Oliveira VM, de Cássia S da Silva M, Kasuya MC, de Sousa MP, Torres AP, Souza RS, Bassin JP, da Silva CC.
38	Long-chain n-alkane biodegradation coupling to methane production in an enriched culture from production water of a high-temperature oil reservoir	2020	10.1186/s13568-020-00998-5				Chen J, Liu YF, Zhou L, Irfan M, Hou ZW, Li W, Mbadinga SM, Liu JF, Yang SZ, Wu XL, Gu JD, Mu BZ.
39	Metabolic versatility and indigenous origin of the archaeon Thermococcus sibiricus, isolated from a siberian oil reservoir, as revealed by genome analysis	2009	10.1128/aem.00718-09				Mardanov AV, Ravin NV, Svetlitchnyi VA, Beletsky AV, Miroshnichenko ML, Bonch-Osmolovskaya EA, Skryabin KG.
40	Simultaneous detection of transcribed functional assA gene and the corresponding metabolites of linear alkanes (C(4), C(5), and C(7)) in production water of a low-temperature oil reservoir	2020	10.1016/j.scitotenv.2020.141290				Liu JF, Lu YW, Zhou L, Li W, Hou ZW, Yang SZ, Wu XL, Gu JD, Mu BZ.
41	Complementary DNA/RNA-Based Profiling: Characterization of Corrosive Microbial Communities and Their Functional Profiles in an Oil Production Facility	2019	10.3389/fmicb.2019.02587				Salgar-Chaparro SJ, Machuca LL.
42	In depth metagenomic analysis in contrasting oil wells reveals syntrophic bacterial and archaeal associations for oil biodegradation in petroleum reservoirs	2020	10.1016/j.scitotenv.2020.136646				Sierra-Garcia IN, Belgini DRB, Torres-Ballesteros A, Paez-Espino D, Capilla R, Santos Neto EV, Gray N, de Oliveira VM.
43	Genomic and Transcriptomic Evidence Supports Methane Metabolism in Archaeoglobi	2020	10.1128/msystems.00651-19				Liu YF, Chen J, Zaramela LS, Wang LY, Mbadinga SM, Hou ZW, Wu XL, Gu JD, Zengler K, Mu BZ.
44	Metabolites of an Oil Field Sulfide-Oxidizing, Nitrate-Reducing Sulfurimonas sp. Cause Severe Corrosion	2019	10.1128/aem.01891-18				Lahme S, Enning D, Callbeck CM, Menendez Vega D, Curtis TP, Head IM, Hubert CRJ.
45	Response of microbial community and catabolic genes to simulated petroleum hydrocarbon spills in soils/sediments from different geographic locations	2017	10.1111/jam.13549				Liu Q, Tang J, Liu X, Song B, Zhen M, Ashbolt NJ.
46	Halomonas plays a central role in the syntrophic community of an alkaline oil reservoir with alkali-surfactant-polymer (ASP) flooding	2020	10.1016/j.scitotenv.2020.141333				Chen Y, Pan J, Yun Y, Zhi B, Li G, Li M, Ma T.
47	Experimental Study on Microbial Induced Calcium Carbonate Precipitation to Enhance Reservoir Recovery	2022	10.30498/ijb.2021.279942.3024				Zhong M, Liu B, Zhang L, Wang J, Chen J, Li J, Liu Y, Ming L.
48	Anaerobic hydrocarbon degradation in candidate phylum 'Atribacteria' (JS1) inferred from genomics	2019	10.1038/s41396-019-0448-2				Liu YF, Qi ZZ, Shou LB, Liu JF, Yang SZ, Gu JD, Mu BZ.
49	Toxicological and chemical studies of wastewater from hydraulic fracture and conventional shale gas wells	2018	10.1002/etc.4146				Crosby LM, Tatu CA, Varonka M, Charles KM, Orem WH.
50	Carbonate Precipitation through Microbial Activities in Natural Environment, and Their Potential in Biotechnology: A Review	2016	10.3389/fbioe.2016.00004				Zhu T, Dittrich M.
51	Investigating the role of the carbon storage regulator A (CsrA) in Leptospira spp	2021	10.1371/journal.pone.0260981				Phoka T, Fule L, Da Fonseca JP, Cokelaer T, Picardeau M, Patarakul K.
52	Combining stable carbon isotope analysis and petroleum-fingerprinting to evaluate petroleum contamination in the Yanchang oilfield located on loess plateau in China	2018	10.1007/s11356-017-0500-6				Wang Y, Liang J, Wang J, Gao S.
53	Mitigating Sulfidogenesis With Simultaneous Perchlorate and Nitrate Treatments	2018	10.3389/fmicb.2018.02305				Engelbrektson A, Briseno V, Liu Y, Figueroa I, Yee M, Shao GL, Carlson H, Coates JD.
54	Reliable inkjet printing of chondrocytes and MSCs using reservoir agitation	2020	10.1088/1758-5090/aba2f8				Dudman JPR, Ferreira AM, Gentile P, Wang X, Ribeiro RDC, Benning M, Dalgarno KW.
55	Genetic and Comparative Genome Analysis of Exiguobacterium aurantiacum SW-20, a Petroleum-Degrading Bacteria with Salt Tolerance and Heavy Metal-Tolerance Isolated from Produced Water of Changqing Oilfield, China	2021	10.3390/microorganisms10010066				Su Z, Wang S, Yang S, Yin Y, Cao Y, Li G, Ma T.
56	Understanding Microbial Community Dynamics in Up-Flow Bioreactors to Improve Mitigation Strategies for Oil Souring	2020	10.3389/fmicb.2020.585943				Dutta A, Smith B, Goldman T, Walker L, Streets M, Eden B, Dirmeier R, Bowman JS.
57	Rock-Hosted Subsurface Biofilms: Mineral Selectivity Drives Hotspots for Intraterrestrial Life	2021	10.3389/fmicb.2021.658988				Casar CP, Kruger BR, Osburn MR.
58	Diversity and Composition of Sulfate-Reducing Microbial Communities Based on Genomic DNA and RNA Transcription in Production Water of High Temperature and Corrosive Oil Reservoir	2017	10.3389/fmicb.2017.01011				Li XX, Liu JF, Zhou L, Mbadinga SM, Yang SZ, Gu JD, Mu BZ.
59	Genome sequence of Brevibacillus agri strain 5-2, isolated from the formation water of petroleum reservoir	2014	10.1016/j.margen.2014.08.006				She Y, Wu W, Hang C, Jiang X, Chai L, Yu G, Shu F, Wang Z, Su S, Xiang T, Zhang Z, Hou D, Zhang F, Zheng B.
60	Subinhibitory Concentrations of Allicin Decrease Uropathogenic Escherichia coli (UPEC) Biofilm Formation, Adhesion Ability, and Swimming Motility	2016	10.3390/ijms17070979				Yang X, Sha K, Xu G, Tian H, Wang X, Chen S, Wang Y, Li J, Chen J, Huang N.
61	Candida albicans and non-C. albicans Candida species: comparison of biofilm production and metabolic activity in biofilms, and putative virulence properties of isolates from hospital environments and infections	2013	10.1007/s11046-013-9638-z				Ferreira AV, Prado CG, Carvalho RR, Dias KS, Dias AL.
62	Profiling of Indigenous Microbial Community Dynamics and Metabolic Activity During Enrichment in Molasses-Supplemented Crude Oil-Brine Mixtures for Improved Understanding of Microbial Enhanced Oil Recovery	2015	10.1007/s12010-015-1626-y				Halim AY, Pedersen DS, Nielsen SM, Lantz AE.
63	High quality genome sequence and description of Enterobacter mori strain 5-4, isolated from a mixture of formation water and crude-oil	2015	10.1186/1944-3277-10-9				Zhang F, Su S, Yu G, Zheng B, Shu F, Wang Z, Xiang T, Dong H, Zhang Z, Hou D, She Y.
64	Transcriptome analysis of Porphyromonas gingivalis and Acinetobacter baumannii in polymicrobial communities	2018	10.1111/omi.12238				Miller DP, Wang Q, Weinberg A, Lamont RJ.
65	The microbial community of a biofilm lining the wall of a pristine cave in Western New Guinea	2020	10.1016/j.micres.2020.126584				Turrini P, Tescari M, Visaggio D, Pirolo M, Lugli GA, Ventura M, Frangipani E, Visca P.
66	Propionate metabolism and diversity of relevant functional genes by in silico analysis and detection in subsurface petroleum reservoirs	2017	10.1007/s11274-017-2350-2				Yang T, Mbadinga SM, Zhou L, Yang SZ, Liu JF, Gu JD, Mu BZ.
67	Deepwater Horizon crude oil exposure alters cholesterol biosynthesis with implications for developmental cardiotoxicity in larval mahi-mahi (Coryphaena hippurus)	2019	10.1016/j.cbpc.2019.03.001				McGruer V, Pasparakis C, Grosell M, Stieglitz JD, Benetti DD, Greer JB, Schlenk D.
68	Diverse, rare microbial taxa responded to the Deepwater Horizon deep-sea hydrocarbon plume	2016	10.1038/ismej.2015.121				Kleindienst S, Grim S, Sogin M, Bracco A, Crespo-Medina M, Joye SB.
69	Candida albicans Dispersed Cells Are Developmentally Distinct from Biofilm and Planktonic Cells	2018	10.1128/mbio.01338-18				Uppuluri P, Acosta Zaldívar M, Anderson MZ, Dunn MJ, Berman J, Lopez Ribot JL, Köhler JR.
70	Beta- lactam antibiotics stimulate biofilm formation in non-typeable haemophilus influenzae by up-regulating carbohydrate metabolism	2014	10.1371/journal.pone.0099204				Wu S, Li X, Gunawardana M, Maguire K, Guerrero-Given D, Schaudinn C, Wang C, Baum MM, Webster P.
71	Genome-Resolved Metagenomic Analysis Reveals Roles for Candidate Phyla and Other Microbial Community Members in Biogeochemical Transformations in Oil Reservoirs	2016	10.1128/mbio.01669-15				Hu P, Tom L, Singh A, Thomas BC, Baker BJ, Piceno YM, Andersen GL, Banfield JF.
72	Characterization of Swedish Campylobacter coli clade 2 and clade 3 water isolates	2018	10.1002/mbo3.583				Nilsson A, Skarp A, Johansson C, Kaden R, Engstrand L, Rautelin H.
73	Halomonas sulfidaeris-dominated microbial community inhabits a 1.8 km-deep subsurface Cambrian Sandstone reservoir	2014	10.1111/1462-2920.12325				Dong Y, Kumar CG, Chia N, Kim PJ, Miller PA, Price ND, Cann IK, Flynn TM, Sanford RA, Krapac IG, Locke RA 2nd, Hong PY, Tamaki H, Liu WT, Mackie RI, Hernandez AG, Wright CL, Mikel MA, Walker JL, Sivaguru M, Fried G, Yannarell AC, Fouke BW.
74	Metabolic Traits of Bovine Shiga Toxin-Producing Escherichia Coli (STEC) Strains with Different Colonization Properties	2020	10.3390/toxins12060414				Barth SA, Weber M, Schaufler K, Berens C, Geue L, Menge C.
75	Shifts in the microbial community composition of Gulf Coast beaches following beach oiling	2013	10.1371/journal.pone.0074265				Newton RJ, Huse SM, Morrison HG, Peake CS, Sogin ML, McLellan SL.
76	Food-grade D-limonene enhanced a green biocide in the mitigation of carbon steel biocorrosion by a mixed-culture biofilm consortium	2022	10.1007/s00449-021-02685-6				Unsal T, Wang D, Kijkla P, Kumseranee S, Punpruk S, Mohamed ME, Saleh MA, Gu T.
77	Co-delivery of ciprofloxacin and colistin using microcontainers for bacterial biofilm treatment	2021	10.1016/j.ijpharm.2021.120420				Birk SE, Mazzoni C, Mobasharah Javed M, Borre Hansen M, Krogh Johansen H, Anders Juul Haagensen J, Molin S, Hagner Nielsen L, Boisen A.
78	[A Thermotolerant and Halotolerant Sulfate-reducing Bacterium in Produced Water from an Offshore High-temperature Oilfield in Bohai Bay, China: Isolation, Phenotypic Characterization, and Inhibition]	2018	10.13227/j.hjkx.201802103				Yang CL, Yuan MY, Shi RJ, Yan PJ, Zhao F, Han SQ, Zhang Y.
79	Different Phenotypes of Mature Biofilm in Flavobacterium psychrophilum Share a Potential for Virulence That Differs from Planktonic State	2017	10.3389/fcimb.2017.00076				Levipan HA, Avendaño-Herrera R.
80	The transcriptional programme of Salmonella enterica serovar Typhimurium reveals a key role for tryptophan metabolism in biofilms	2009	10.1186/1471-2164-10-599				Hamilton S, Bongaerts RJ, Mulholland F, Cochrane B, Porter J, Lucchini S, Lappin-Scott HM, Hinton JC.
81	Novel magnetic nanoparticle-containing adhesive with greater dentin bond strength and antibacterial and remineralizing capabilities	2018	10.1016/j.dental.2018.06.001				Li Y, Hu X, Xia Y, Ji Y, Ruan J, Weir MD, Lin X, Nie Z, Gu N, Masri R, Chang X, Xu HHK.
82	Identification of key genes and molecular mechanisms associated with low egg production of broiler breeder hens in ad libitum	2019	10.1186/s12864-019-5801-3				Wei Z, Li P, Huang S, Lkhagvagarav P, Zhu M, Liang C, Jia C.
83	Colombian Andean thermal springs: reservoir of thermophilic anaerobic bacteria producing hydrolytic enzymes	2019	10.1007/s00792-019-01132-5				Rubiano-Labrador C, Díaz-Cárdenas C, López G, Gómez J, Baena S.
84	Ecological distribution and potential roles of Woesearchaeota in anaerobic biogeochemical cycling unveiled by genomic analysis	2021	10.1016/j.csbj.2021.01.013				Liu X, Wang Y, Gu JD.
85	Different metabolism of EPA, DPA and DHA in humans: A double-blind cross-over study	2020	10.1016/j.plefa.2019.102033				Guo XF, Tong WF, Ruan Y, Sinclair AJ, Li D.
86	RNA-seq transcriptome analysis of the immature seeds of two Brassica napus lines with extremely different thousand-seed weight to identify the candidate genes related to seed weight	2018	10.1371/journal.pone.0191297				Geng X, Dong N, Wang Y, Li G, Wang L, Guo X, Li J, Wen Z, Wei W.
87	Natural oil slicks fuel surface water microbial activities in the northern Gulf of Mexico	2014	10.3389/fmicb.2014.00188				Ziervogel K, D'Souza N, Sweet J, Yan B, Passow U.
88	New hydrocarbon degradation pathways in the microbial metagenome from Brazilian petroleum reservoirs	2014	10.1371/journal.pone.0090087				Sierra-García IN, Correa Alvarez J, de Vasconcellos SP, Pereira de Souza A, dos Santos Neto EV, de Oliveira VM.
89	The metabolism of pyrene by a novel Altererythrobacter sp. with in-situ co-substrates: A mechanistic analysis based on pathway, genomics, and enzyme activity	2022	10.1016/j.chemosphere.2022.135784				Fan K, Feng Q, Li K, Lin J, Wang W, Cao Y, Gai H, Song H, Huang T, Zhu Q, Xiao M.
90	Novel Bacillus cereus strain from electrokinetically remediated saline soil towards the remediation of crude oil	2018	10.1007/s11356-018-2495-z				Gao YC, Guo SH, Wang JN, Zhang W, Chen GH, Wang H, Du J, Liu Y, Naidu R.
91	Metagenomic and geochemical characterization of pockmarked sediments overlaying the Troll petroleum reservoir in the North Sea	2012	10.1186/1471-2180-12-203				Håvelsrud OE, Haverkamp TH, Kristensen T, Jakobsen KS, Rike AG.
92	High potential of adhesion to biotic and abiotic surfaces by opportunistic Staphylococcus aureus strains isolated from orthodontic appliances	2016	10.1016/j.micpath.2015.11.009				Merghni A, Ben Nejma M, Dallel I, Tobji S, Ben Amor A, Janel S, Lafont F, Aouni M, Mastouri M.
93	Hydrocarbonoclastic Alcanivorax Isolates Exhibit Different Physiological and Expression Responses to n-dodecane	2016	10.3389/fmicb.2016.02056				Barbato M, Scoma A, Mapelli F, De Smet R, Banat IM, Daffonchio D, Boon N, Borin S.
94	Proteomics analysis of aromatic catabolic pathways in thermophilic Geobacillus thermodenitrificans NG80-2	2012	10.1016/j.jprot.2011.10.035				Li Y, Wu J, Wang W, Ding P, Feng L.
95	Investigation of biosurfactant-producing indigenous microorganisms that enhance residue oil recovery in an oil reservoir after polymer flooding	2011	10.1007/s12010-010-9032-y				She YH, Zhang F, Xia JJ, Kong SQ, Wang ZL, Shu FC, Hu JM.
96	Automated MEMS-based Drosophila embryo injection system for high-throughput RNAi screens	2006	10.1039/b600238b				Zappe S, Fish M, Scott MP, Solgaard O.
97	Novel dental adhesive with triple benefits of calcium phosphate recharge, protein-repellent and antibacterial functions	2017	10.1016/j.dental.2017.03.002				Xie X, Wang L, Xing D, Zhang K, Weir MD, Liu H, Bai Y, Xu HHK.
98	Cross-contamination potential of saliva ejectors used in dentistry	1998	10.1016/s0195-6701(98)90308-5				Barbeau J, ten Bokum L, Gauthier C, Prévost AP.
99	High-throughput metagenomic analysis of petroleum-contaminated soil microbiome reveals the versatility in xenobiotic aromatics metabolism	2017	10.1016/j.jes.2016.08.022				Bao YJ, Xu Z, Li Y, Yao Z, Sun J, Song H.
100	Bioremediation of various aromatic and emerging pollutants by Bacillus cereus sp. isolated from petroleum sludge	2021	10.2166/wst.2021.065				Alhefeiti MA, Athamneh K, Vijayan R, Ashraf SS.
101	Isolation and complete genome sequence of Halorientalis hydrocarbonoclasticus sp. nov., a hydrocarbon-degrading haloarchaeon	2017	10.1007/s00792-017-0968-5				Zhao D, Kumar S, Zhou J, Wang R, Li M, Xiang H.
102	Can preening contribute to influenza A virus infection in wild waterbirds?	2010	10.1371/journal.pone.0011315				Delogu M, De Marco MA, Di Trani L, Raffini E, Cotti C, Puzelli S, Ostanello F, Webster RG, Cassone A, Donatelli I.
103	Proteomic analysis of Neisseria gonorrhoeae biofilms shows shift to anaerobic respiration and changes in nutrient transport and outermembrane proteins	2012	10.1371/journal.pone.0038303				Phillips NJ, Steichen CT, Schilling B, Post DM, Niles RK, Bair TB, Falsetta ML, Apicella MA, Gibson BW.
104	Evidencing the role of carbonic anhydrase in the formation of carbonate minerals by bacterial strains isolated from extreme environments in Qatar	2022	10.1016/j.heliyon.2022.e11151				Abdelsamad R, Al Disi Z, Abu-Dieyeh M, Al-Ghouti MA, Zouari N.
105	Effects of dietary lipid sources on hepatic nutritive contents, fatty acid composition and proteome of Nile tilapia (Oreochromis niloticus)	2019	10.1016/j.jprot.2018.09.003				Boonanuntanasarn S, Nakharuthai C, Schrama D, Duangkaew R, Rodrigues PM.
106	Molecular interaction between methicillin-resistant Staphylococcus aureus (MRSA) and chicken breast reveals enhancement of pathogenesis and toxicity for food-borne outbreak	2021	10.1016/j.fm.2020.103602				Chung HY, Kim YT, Kwon JG, Im HH, Ko D, Lee JH, Choi SH.
107	Low-level predation by lytic phage phiIPLA-RODI promotes biofilm formation and triggers the stringent response in Staphylococcus aureus	2017	10.1038/srep40965				Fernández L, González S, Campelo AB, Martínez B, Rodríguez A, García P.
108	In situ detection of anaerobic alkane metabolites in subsurface environments	2013	10.3389/fmicb.2013.00140				Agrawal A, Gieg LM.
109	Candidatus Mcinerneyibacterium aminivorans gen. nov., sp. nov., the first representative of the candidate phylum Mcinerneyibacteriota phyl. nov. recovered from a high temperature, high salinity tertiary oil reservoir in north central Oklahoma, USA	2020	10.1016/j.syapm.2020.126057				Yadav A, Vilcáez J, Farag IF, Johnson B, Mueller K, Youssef NH, Elshahed MS.
110	Transcriptome Analysis of Oleoresin-Producing Tree Sindora Glabra and Characterization of Sesquiterpene Synthases	2018	10.3389/fpls.2018.01619				Yu N, Yang JC, Yin GT, Li RS, Zou WT.
111	Characterization of sulfate-reducing bacteria isolated from oil-field waters	1996	10.1139/m96-038				Tardy-Jacquenod C, Caumette P, Matheron R, Lanau C, Arnauld O, Magot M.
112	Grease Waste as a Reservoir of Lipase-Producing Yeast and Description of Limtongella siamensis gen. nov., sp. nov	2019	10.3390/microorganisms8010027				Sakpuntoon V, Angchuan J, Boontham W, Khunnamwong P, Boonmak C, Srisuk N.
113	Genome sequencing and annotation of Geobacillus sp. 1017, a hydrocarbon-oxidizing thermophilic bacterium isolated from a heavy oil reservoir (China)	2016	10.1016/j.gdata.2016.12.011				Kadnikov VV, Mardanov AV, Poltaraus AB, Sokolova DS, Semenova EM, Ravin NV, Tourova TP, Nazina TN.
114	Detection of Escherichia coli in biofilms from pipe samples and coupons in drinking water distribution networks	2007	10.1128/aem.00845-07				Juhna T, Birzniece D, Larsson S, Zulenkovs D, Sharipo A, Azevedo NF, Ménard-Szczebara F, Castagnet S, Féliers C, Keevil CW.
115	N-Acetylcysteine (NAC) Ameliorates Lipid-Related Metabolic Dysfunction in Bone Marrow Stromal Cells-Derived Adipocytes	2018	10.1155/2018/5310961				Raffaele M, Barbagallo I, Licari M, Carota G, Sferrazzo G, Spampinato M, Sorrenti V, Vanella L.
116	Polyelectrolyte multilayers fabricated from antifungal β-peptides: design of surfaces that exhibit antifungal activity against Candida albicans	2010	10.1021/bm100424s				Karlsson AJ, Flessner RM, Gellman SH, Lynn DM, Palecek SP.
117	Dorsomedial hindbrain catecholamine regulation of hypothalamic astrocyte glycogen metabolic enzyme protein expression: Impact of estradiol	2015	10.1016/j.neuroscience.2015.02.019				Tamrakar P, Shrestha PK, Briski KP.
118	Isolation from oil reservoirs of novel thermophilic anaerobes phylogenetically related to Thermoanaerobacter subterraneus: reassignment of T. subterraneus, Thermoanaerobacter yonseiensis, Thermoanaerobacter tengcongensis and Carboxydibrachium pacificum to Caldanaerobacter subterraneus gen. nov., sp. nov., comb. nov. as four novel subspecies	2004	10.1099/ijs.0.02711-0				Fardeau ML, Salinas MB, L'Haridon S, Jeanthon C, Verhé F, Cayol JL, Patel BKC, Garcia JL, Ollivier B.
119	Draft genome sequence of Paenibacillus sp. strain A2	2016	10.1186/s40793-015-0125-7				Zheng B, Zhang F, Dong H, Chai L, Shu F, Yi S, Wang Z, Cui Q, Dong H, Zhang Z, Hou D, Yang J, She Y.
120	A constant flux of diverse thermophilic bacteria into the cold Arctic seabed	2009	10.1126/science.1174012				Hubert C, Loy A, Nickel M, Arnosti C, Baranyi C, Brüchert V, Ferdelman T, Finster K, Christensen FM, Rosa de Rezende J, Vandieken V, Jørgensen BB.
121	Rat uterine microbiochemistry: metabolic enzyme activities stimulated by 17-beta-estradiol are localized in epithelial cells	1987	10.1177/35.6.3571958				Holt JP Jr, Rhe E.
122	Controlled release of chlorhexidine from a mesoporous silica-containing macroporous titanium dental implant prevents microbial biofilm formation	2017	10.22203/ecm.v033a02				De Cremer K, Braem A, Gerits E, De Brucker K, Vandamme K, Martens JA, Michiels J, Vleugels J, Cammue BP, Thevissen K.
123	Effect of fish oil supplementation on fatty acid status, coordination, and fine motor skills in children with phenylketonuria	2007	10.1016/j.jpeds.2006.12.011				Beblo S, Reinhardt H, Demmelmair H, Muntau AC, Koletzko B.
124	Draft Genome Sequence of Geotoga petraea Strain HO-Geo1, Isolated from a Petroleum Reservoir in Russia	2019	10.1128/mra.00706-19				Grouzdev DS, Semenova EM, Sokolova DS, Tourova TP, Poltaraus AB, Nazina TN.
125	Genome sequence of the moderately thermophilic, amino-acid-degrading and sulfur-reducing bacterium Thermovirga lienii type strain (Cas60314(T))	2012	10.4056/sigs.2726028				Göker M, Saunders E, Lapidus A, Nolan M, Lucas S, Hammon N, Deshpande S, Cheng JF, Han C, Tapia R, Goodwin LA, Pitluck S, Liolios K, Mavromatis K, Pagani I, Ivanova N, Mikhailova N, Pati A, Chen A, Palaniappan K, Land M, Chang YJ, Jeffries CD, Brambilla EM, Rohde M, Spring S, Detter JC, Woyke T, Bristow J, Eisen JA, Markowitz V, Hugenholtz P, Kyrpides NC, Klenk HP.
126	Structural Insights into the Methane-Generating Enzyme from a Methoxydotrophic Methanogen Reveal a Restrained Gallery of Post-Translational Modifications	2021	10.3390/microorganisms9040837				Kurth JM, Müller MC, Welte CU, Wagner T.
127	Modification of rock/fluid and fluid/fluid interfaces during MEOR processes, using two biosurfactant producing strains of Bacillus stearothermophilus SUCPM#14 and Enterobacter cloacae: a mechanistic study	2014	10.1016/j.colsurfb.2013.12.002				Sarafzadeh P, Zeinolabedini Hezave A, Mohammadi S, Niazi A, Ayatollahi S.
128	Isolation and characterization of a novel phenanthrene (PHE) degrading strain Psuedomonas sp. USTB-RU from petroleum contaminated soil	2013	10.1016/j.jhazmat.2013.10.007				Masakorala K, Yao J, Cai M, Chandankere R, Yuan H, Chen H.
129	Enhanced removal of veterinary antibiotic from wastewater by photoelectroactive biofilm of purple anoxygenic phototroph through photosynthetic electron uptake	2020	10.1016/j.scitotenv.2020.136605				Sun J, Yang P, Huang S, Li N, Zhang Y, Yuan Y, Lu X.
130	Stability of binary and ternary model oil-field particle suspensions: a multivariate analysis approach	2009	10.1016/j.jcis.2009.05.068				Dudásová D, Rune Flåten G, Sjöblom J, Øye G.
131	Draft Genome Sequence of Halomonas titanicae Strain TAT1, a Hydrocarbon-Oxidizing Halophilic Bacterium Isolated from a Petroleum Reservoir in Russia	2020	10.1128/mra.01255-20				Grouzdev DS, Sokolova DS, Poltaraus AB, Nazina TN.
132	Insight into a highly polymorphic endophyte isolated from the roots of the halophytic seepweed Suaeda salsa: Laburnicola rhizohalophila sp. nov. (Didymosphaeriaceae, Pleosporales)	2020	10.1016/j.funbio.2019.10.001				Yuan Z, Druzhinina IS, Wang X, Zhang X, Peng L, Labbé J.
133	Energetics of the Ventilatory Piston Pump of the Lugworm, a Deposit-feeding Polychaete Living in a Burrow	1994	10.2307/1542055				Toulmond A, Dejours P.
134	Assessing the potential risk of oil-field produced waters using a battery of bioassays/biomarkers	2008	10.1007/s00128-008-9465-y				Li J, Ma M, Cui Q, Wang Z.
135	Inexpensive metagenomic DNA extraction protocol with high quality from marine sediments contaminated by petroleum hydrocarbons	2017	10.4238/gmr16039743				García-Bautista I, Toledano-Thompson T, Dantán-González E, González-Montilla J, Valdez-Ojeda R.
136	Genomic Analysis of Endophytic Bacillus-Related Strains Isolated from the Medicinal Plant Origanum vulgare L. Revealed the Presence of Metabolic Pathways Involved in the Biosynthesis of Bioactive Compounds	2022	10.3390/microorganisms10050919				Semenzato G, Alonso-Vásquez T, Del Duca S, Vassallo A, Riccardi C, Zaccaroni M, Mucci N, Padula A, Emiliani G, Palumbo Piccionello A, Puglia AM, Fani R.
137	Improved reactor performance and operability in the biotransformation of carveol to carvone using a solid-liquid two-phase partitioning bioreactor	2008	10.1002/bit.21957				Morrish JL, Daugulis AJ.
138	Fevillea trilobata as a Natural Host of Zucchini yellow mosaic virus in Brazil	2013	10.1094/pdis-04-13-0351-pdn				Boiteux LS, Spadotti DMA, Rezende JAM, Kitajima EW.
139	Antifungal resistance of candidal biofilms formed on denture acrylic in vitro	2001	10.1177/00220345010800031101				Chandra J, Mukherjee PK, Leidich SD, Faddoul FF, Hoyer LL, Douglas LJ, Ghannoum MA.
140	Are the n-3 fatty acids from dietary fish oil deposited in the triglyceride stores of adipose tissue?	1990	10.1093/ajcn/51.4.535				Lin DS, Conner WE.
141	Permanent draft genome sequence of Dethiosulfovibrio peptidovorans type strain (SEBR 4207)	2010	10.4056/sigs.1092865				Labutti K, Mayilraj S, Clum A, Lucas S, Glavina Del Rio T, Nolan M, Tice H, Cheng JF, Pitluck S, Liolios K, Ivanova N, Mavromatis K, Mikhailova N, Pati A, Goodwin L, Chen A, Palaniappan K, Land M, Hauser L, Chang YJ, Jeffries CD, Rohde M, Spring S, Göker M, Woyke T, Bristow J, Eisen JA, Markowitz V, Hugenholtz P, Kyrpides NC, Klenk HP, Lapidus A.
142	Evaluation of extracellular polymeric substances extracted from waste activated sludge as a renewable corrosion inhibitor	2019	10.7717/peerj.7193				Go LC, Holmes W, Depan D, Hernandez R.
143	Draft Genome Sequence of a Fermenting Bacterium, Soehngenia sp. Strain 1933P, Isolated from a Petroleum Reservoir in Azerbaijan	2019	10.1128/mra.00689-19				Grouzdev DS, Bidzhieva SK, Sokolova DS, Tourova TP, Poltaraus AB, Nazina TN.
144	A new set of Arabidopsis expressed sequence tags from developing seeds. The metabolic pathway from carbohydrates to seed oil	2000	10.1104/pp.124.4.1582				White JA, Todd J, Newman T, Focks N, Girke T, de Ilárduya OM, Jaworski JG, Ohlrogge JB, Benning C.

## Sheet: Without DOI
Item	Title	Year	DOI	Document Type	Language	Cited By	Author(s)
66	[Microbial metabolic characteristics and ecological controlling in petroleum reservoir--a review]	2011					Gao P, Ma T, Liu R.
77	Use of Some Additives for Improving Mesenchymal Stem Cell Isolation Outcomes in Non-Mobilized Peripheral Blood	2018					Pouryazdanpanah N, Vahidi R, Dabiri S, Derakhshani A, Farsinezhad A.
103	[Inhibition of the activity of sulfate-reducing bacteria in produced water from oil reservoir by nitrate]	2014					Yang DY, Zhang Y, Shi RJ, Han SQ, Li GZ, Li GQ, Zhao JY.
111	[Phytoremediation of Petroleum Contaminated Soils with Iris pseudacorus L. and the Metabolic Analysis in Roots]	2016					Wang YN, Cheng LJ, Zhou QX.
115	[A new method of microbial prospecting for oil and gas based on BIOLOG metabolic fingerprinting analysis]	2012					Liao X, Zhang T, Zeng J, Sun J, Hu W, Lou K.
133	[Carbon source utilization characteristics of microbial communities in a petroleum-contaminated soil in Daqing Oil Field, Northeast China]	2011					Yue BB, Li X, Ren FF, Meng FJ, Yin PD, Zhang HH, Sun GY.
136	[Phylogenetic diversity and activity of anaerobic microorganisms of high-temperature horizons of the Dagang Oilfield (China)]	2006					Nazina TN, Shestakova NM, Grigor'ian AA, Mikhaĭlova EM, Turova TP, Poltaraus AB, Feng C, Ni F, Beliaev SS.
147	[Rhizospheric Mechanisms of Hemerocallis middendorfii Trautv. et Mey. Remediating Petroleum-contaminated Soil and Metabonomic Analyses of the Root Systems]	2016					Wang YN, Cheng LJ, Zhou QX.
153	Measurement of metabolites in single preimplantation embryos; a new means to study metabolic control in early embryos	1978					Barbehenn EK, Wales RG, Lowry OH.
154	NTP Toxicology and Carcinogenesis Studies of Nitromethane (CAS No. 75-52-5) in F344/N Rats and B6C3F1 Mice (Inhalation Studies)	1997					National Toxicology Program.

## Sheet: Duplicates
Item	Title	Year	DOI	Document Type	Language	Cited By	Author(s)	Duplicate Type
