# Supplementary material for: Metabolically Active Microbial Communities in Oilfields: A Systematic Review and Synthesis of RNA Preservation, Extraction, and Sequencing Methods
Source: MDPI journal article supplement (doi:10.3390/applmicrobiol3040079), 2023-10-06
Supplement: s1 [file s1 › Table S2. script format_input_pmc.xlsx]

## Sheet: Detail
Item	Title	Year	DOI	Document Type	Language	Cited By	Author(s)
1	Corrosion-influencing microorganisms in petroliferous regions on a global scale: systematic review, analysis, and scientific synthesis of 16S amplicon metagenomic studies.	2023	10.7717/peerj.14642	Article	English		Dutra, Joyce; Gomes, Rosimeire; Yupanqui García, Glen Jasper; Romero-Cale, Danitza Xiomara; Santos Cardoso, Mariana; Waldow, Vinicius; Groposo, Claudia; Akamine, Rubens N.; Sousa, Maira; Figueiredo, Henrique; Azevedo, Vasco; Góes-Neto, Aristóteles
2	Phenotypic Assessment of Clinical Escherichia coli Isolates as an Indicator for Uropathogenic Potential.		10.1128/msystems.00827-22	Article	English		Shea, A. E.; Frick-Cheng, A. E.; Smith, S. N.; Mobley, H. L. T.
3	Evidencing the role of carbonic anhydrase in the formation of carbonate minerals by bacterial strains isolated from extreme environments in Qatar.	2022	10.1016/j.heliyon.2022.e11151	Article	English		Abdelsamad, Rim; Al Disi, Zulfa; Abu-Dieyeh, Mohammed; Al-Ghouti, Mohammad A.; Zouari, Nabil
4	Well Performance Classification and Prediction: Deep Learning and Machine Learning Long Term Regression Experiments on Oil, Gas, and Water Production.	2022	10.3390/s22145326	Article	English		Ibrahim, Nehad M.; Alharbi, Ali A.; Alzahrani, Turki A.; Abdulkarim, Abdullah M.; Alessa, Ibrahim A.; Hameed, Abdullah M.; Albabtain, Abdullaziz S.; Alqahtani, Deemah A.; Alsawwaf, Mohammad K.; Almuqhim, Abdullah A.
5	Phenotypic and Genotypic Detection of Biofilm-Forming Staphylococcus aureus from Different Food Sources in Bangladesh.	2022	10.3390/biology11070949	Article	English		Ballah, Fatimah Muhammad; Islam, Md. Saiful; Rana, Md. Liton; Ferdous, Farhana Binte; Ahmed, Rokeya; Pramanik, Pritom Kumar; Karmoker, Jarna; Ievy, Samina; Sobur, Md. Abdus; Siddique, Mahbubul Pratik; Khatun, Mst. Minara; Rahman, Marzia; Rahman, Md. Tanvir
6	The Microbial Community and Functional Potential in the Midland Basin Reveal a Community Dominated by Both Thiosulfate and Sulfate-Reducing Microorganisms.		10.1128/spectrum.00049-22	Article	English		Tinker, Kara; Lipus, Daniel; Gardiner, James; Stuckman, Mengling; Gulliver, Djuna
7	Prevalence and Virulence Characteristics of Enterococcus faecalis and Enterococcus faecium in Bovine Mastitis Milk Compared to Bovine Normal Raw Milk in South Korea.	2022	10.3390/ani12111407	Article	English		Kim, Hyeon-Jin; Youn, Hye-Young; Kang, Hye-Jeong; Moon, Jin-San; Jang, Yong-Seok; Song, Kwang-Young; Seo, Kun-Ho
8	The car tank lid bacteriome: a reservoir of bacteria with potential in bioremediation of fuel.	2022	10.1038/s41522-022-00299-8	Article	English		Vidal-Verdú, Àngela; Gómez-Martínez, Daniela; Latorre-Pérez, Adriel; Peretó, Juli; Porcar, Manuel
9	Effects of Oil Types and Fat Concentrations on Production Performance, Egg Quality, and Antioxidant Capacity of Laying Hens.	2022	10.3390/ani12030315	Article	English		Gao, Zhouyang; Duan, Zhongyi; Zhang, Junnan; Zheng, Jiangxia; Li, Fuwei; Xu, Guiyun
10	The Dark Side of Microbial Processes: Accumulation of Nitrate During Storage of Surface Water in the Dark and the Underlying Mechanism.		10.1128/spectrum.02232-21	Article	English		Kumar, Amit; Ng, Daphne H. P.; Bairoliya, Sakcham; Cao, Bin
11	High-resolution association mapping with libraries of immortalized lines from ancestral landraces.	2021	10.1007/s00122-021-03963-3	Article	English		Würschum, Tobias; Weiß, Thea M.; Renner, Juliane; Friedrich Utz, H.; Gierl, Alfons; Jonczyk, Rafal; Römisch-Margl, Lilla; Schipprack, Wolfgang; Schön, Chris-Carolin; Schrag, Tobias A.; Leiser, Willmar L.; Melchinger, Albrecht E.
12	Pomacea canaliculata Ampullar Proteome: A Nematode-Based Bio-Pesticide Induces Changes in Metabolic and Stress-Related Pathways.	2021	10.3390/biology10101049	Article	English		Boraldi, Federica; Lofaro, Francesco Demetrio; Bergamini, Giulia; Ferrari, Agnese; Malagoli, Davide
13	Enterococcus faecalis colonizes and forms persistent biofilm microcolonies on undamaged endothelial surfaces in a rabbit endovascular infection model.	2021	10.1093/femsmc/xtab014	Article	English		Barnes, Aaron M T; Frank, Kristi L; Dale, Jennifer L; Manias, Dawn A; Powers, Jennifer L; Dunny, Gary M
14	Extensive Horizontal Gene Transfer within and between Species of Coagulase-Negative Staphylococcus.	2021	10.1093/gbe/evab206	Article	English		Smith, Joshua T; Andam, Cheryl P
15	Evolutionary innovations driving abiotic stress tolerance in C4 grasses and cereals.	2021	10.1093/plcell/koab205	Article	English		Pardo, Jeremy; VanBuren, Robert
16	Feeding Crude Glycerin to Finishing Iberian Crossbred Pigs: Effects on Growth Performance, Nutrient Digestibility, and Blood Parameters.	2021	10.3390/ani11082181	Article	English		Martínez-Miró, Silvia; Madrid, Josefa; López, Miguel José; Orengo, Juan; Sánchez, Cristian Jesús; Hernández, Fuensanta
17	Role played by the environment in the emergence and spread of antimicrobial resistance (AMR) through the food chain.	2021	10.2903/j.efsa.2021.6651	Article	English		Koutsoumanis, Konstantinos; Allende, Ana; Álvarez‐Ordóñez, Avelino; Bolton, Declan; Bover‐Cid, Sara; Chemaly, Marianne; Davies, Robert; De Cesare, Alessandra; Herman, Lieve; Hilbert, Friederike; Lindqvist, Roland; Nauta, Maarten; Ru, Giuseppe; Simmons, Marion; Skandamis, Panagiotis; Suffredini, Elisabetta; Argüello, Héctor; Berendonk, Thomas; Cavaco, Lina Maria; Gaze, William; Schmitt, Heike; Top…
18	Correlation of Key Physiological Properties of Methanosarcina Isolates with Environment of Origin.		10.1128/aem.00731-21	Article	English		Zhou, Jinjie; Holmes, Dawn E.; Tang, Hai-Yan; Lovley, Derek R.
19	Dental biofilm of symptomatic COVID‐19 patients harbours SARS‐CoV‐2.	2021	10.1111/jcpe.13471	Article	English		Gomes, Sabrina Carvalho; Fachin, Sabrina; da Fonseca, Juliane Gonçalves; Angst, Patrícia Daniela Melchiors; Lamers, Marcelo Lazzaron; da Silva, Ilma Simoni Brum; Nunes, Luciana Neves
20	Long-Term Exposure to Octenidine in a Simulated Sink Trap Environment Results in Selection of Pseudomonas aeruginosa, Citrobacter, and Enterobacter Isolates with Mutations in Efflux Pump Regulators.	2021	10.1128/aem.00210-21	Article	English		Garratt, Isobel; Aranega-Bou, Paz; Sutton, J. Mark; Moore, Ginny; Wand, Matthew E.
21	Construction, petro-collecting/dispersing capacities, antimicrobial activity, and molecular docking study of new cationic surfactant-sulfonamide conjugates.	2021	10.1016/j.molliq.2021.116068	Article	English		Tantawy, Ahmed H.; Shaban, Mahmoud M.; Jiang, Hong; Wang, Man-Qun; Mohamed, Hany I.
22	Bovine Immune Response to Vaccination and Infection with Leptospira borgpetersenii Serovar Hardjo.		10.1128/msphere.00988-20	Article	English		Wilson-Welder, Jennifer H.; Alt, David P.; Nally, Jarlath E.; Olsen, Steven C.
23	Ecological distribution and potential roles of Woesearchaeota in anaerobic biogeochemical cycling unveiled by genomic analysis.	2021	10.1016/j.csbj.2021.01.013	Article	English		Liu, Xiaobo; Wang, Yali; Gu, Ji-Dong
24	Draft Genome Sequence of Halomonas titanicae Strain TAT1, a Hydrocarbon-Oxidizing Halophilic Bacterium Isolated from a Petroleum Reservoir in Russia.	2020	10.1128/mra.01255-20	Article	English		Grouzdev, Denis S.; Sokolova, Diyana S.; Poltaraus, Andrey B.; Nazina, Tamara N.
25	Bibenzyls and bisbybenzyls of bryophytic origin as promising source of novel therapeutics: pharmacology, synthesis and structure-activity.	2020	10.1007/s40199-020-00341-0	Review	English		Nandy, Samapika; Dey, Abhijit
26	Evolutionary responses of marine organisms to urbanized seascapes.	2020	10.1111/eva.13048	Article	English		Elizabeth Alter, S.; Tariq, Laraib; Creed, James Keanu; Megafu, Emmanuel
27	Nutrient Level Determines Biofilm Characteristics and Subsequent Impact on Microbial Corrosion and Biocide Effectiveness.	2020	10.1128/aem.02885-19	Article	English		Salgar-Chaparro, Silvia J.; Lepkova, Katerina; Pojtanabuntoeng, Thunyaluk; Darwin, Adam; Machuca, Laura L.
28	Genomic and Transcriptomic Evidence Supports Methane Metabolism in Archaeoglobi.	2020	10.1128/msystems.00651-19	Article	English		Liu, Yi-Fan; Chen, Jing; Zaramela, Livia S.; Wang, Li-Ying; Mbadinga, Serge Maurice; Hou, Zhao-Wei; Wu, Xiao-Lin; Gu, Ji-Dong; Zengler, Karsten; Mu, Bo-Zhong
29	2407. Overexpression of Virulence Factors in Biofilm from Recurrent Clostridium (Clostridioides) difficile Infection Isolates.	2019	10.1093/ofid/ofz360.2085	Article	English		Tijerina, Laura; Villarreal-Treviño, Licet; Morfin-Otero, Rayo; Camacho-Ortiz, Adrian; Baines, Simon D; Rodríguez-Noriega, Eduardo; Garza-González, Elvira
30	Cyclic di-GMP Increases Catalase Production and Hydrogen Peroxide Tolerance in Vibrio cholerae.	2019	10.1128/aem.01043-19	Article	English		Fernandez, Nicolas L.; Waters, Christopher M.
31	Human Bile-Mediated Regulation of Salmonella Curli Fimbriae.	2019	10.1128/jb.00055-19	Article	English		González, Juan F.; Tucker, Lauren; Fitch, James; Wetzel, Amy; White, Peter; Gunn, John S.
32	Methanogenic Degradation of Long n-Alkanes Requires Fumarate-Dependent Activation.	2019	10.1128/aem.00985-19	Article	English		Ji, Jia-Heng; Liu, Yi-Fan; Zhou, Lei; Mbadinga, Serge Maurice; Pan, Pan; Chen, Jing; Liu, Jin-Feng; Yang, Shi-Zhong; Sand, Wolfgang; Gu, Ji-Dong; Mu, Bo-Zhong
33	Detection and expression analysis of tet(B) in Streptococcus oralis.	2019	10.1080/20002297.2019.1643204	Article	English		Arredondo, Alexandre; Àlvarez, Gerard; Nart, José; Mor, Carolina; Blanc, Vanessa; León, Rubén
34	Hydrocarbon-Degrading Microbial Communities Are Site Specific, and Their Activity Is Limited by Synergies in Temperature and Nutrient Availability in Surface Ocean Waters.	2019	10.1128/aem.00443-19	Article	English		Sun, Xiaoxu; Kostka, Joel E.
35	Draft Genome Sequence of Geotoga petraea Strain HO-Geo1, Isolated from a Petroleum Reservoir in Russia.	2019	10.1128/mra.00706-19	Article	English		Grouzdev, Denis S.; Semenova, Ekaterina M.; Sokolova, Diyana S.; Tourova, Tatiyana P.; Poltaraus, Andrey B.; Nazina, Tamara N.
36	Draft Genome Sequence of a Fermenting Bacterium, Soehngenia sp. Strain 1933P, Isolated from a Petroleum Reservoir in Azerbaijan.	2019	10.1128/mra.00689-19	Article	English		Grouzdev, Denis S.; Bidzhieva, Salimat K.; Sokolova, Diyana S.; Tourova, Tatiyana P.; Poltaraus, Andrey B.; Nazina, Tamara N.
37	Metabolites of an Oil Field Sulfide-Oxidizing, Nitrate-Reducing Sulfurimonas sp. Cause Severe Corrosion.	2019	10.1128/aem.01891-18	Article	English		Lahme, Sven; Enning, Dennis; Callbeck, Cameron M.; Menendez Vega, Demelza; Curtis, Thomas P.; Head, Ian M.; Hubert, Casey R. J.
38	502. Enhanced Sporulation and Vancomycin Resistance Associated With Clostridium difficile From Recurrent Infections.	2018	10.1093/ofid/ofy210.511	Article	English		Tijerina-Rodriguez, Laura E; Martínez-Meléndez, Adrián; Villarreal-Treviño, Licet; Morfín-Otero, Rayo; Camacho-Ortiz, Adrian; Baines, Simon D; Rodríguez-Noriega, Eduardo; Garza-González, Elvira
39	Pressure and temperature effects on deep‐sea hydrocarbon‐degrading microbial communities in subarctic sediments.	2018	10.1002/mbo3.768	Article	English		Perez Calderon, Luis J.; Gontikaki, Evangelia; Potts, Lloyd D.; Shaw, Sophie; Gallego, Alejandro; Anderson, James A.; Witte, Ursula
40	Candida albicans Dispersed Cells Are Developmentally Distinct from Biofilm and Planktonic Cells.	2018	10.1128/mbio.01338-18	Article	English		Uppuluri, Priya; Acosta Zaldívar, Maikel; Anderson, Matthew Z.; Dunn, Matthew J.; Berman, Judith; Lopez Ribot, Jose Luis; Köhler, Julia R.
41	Unconventional oil and gas chemicals and wastewater-impacted water samples promote adipogenesis via PPARγ-dependent and independent mechanisms in 3T3–L1 cells.	2018	10.1016/j.scitotenv.2018.05.030	Article	English		Kassotis, Christopher D.; Nagel, Susan C.; Stapleton, Heather M.
42	PCB126 Inhibits the Activation of AMPK-CREB Signal Transduction Required for Energy Sensing in Liver.	2018	10.1093/toxsci/kfy041	Article	English		Gadupudi, Gopi S; Elser, Benjamin A; Sandgruber, Fabian A; Li, Xueshu; Gibson-Corley, Katherine N; Robertson, Larry W
43	Characterization of Swedish Campylobacter coli clade 2 and clade 3 water isolates.	2018	10.1002/mbo3.583	Article	English		Nilsson, Anna; Skarp, Astrid; Johansson, Cecilia; Kaden, René; Engstrand, Lars; Rautelin, Hilpi
44	Potential Metabolic Activation of Representative Alkylated Polycyclic Aromatic Hydrocarbons 1-Methylphenanthrene and 9-Ethylphenanthrene Associated with the Deepwater Horizon Oil Spill in Human Hepatoma (HepG2) Cells.	2017	10.1021/acs.chemrestox.7b00232	Article	English		Huang, Meng; Mesaros, Clementina; Hackfeld, Linda C.; Hodge, Richard P.; Blair, Ian A.; Penning, Trevor M.
45	Quantum Bayesian perspective for intelligence reservoir characterization, monitoring and management.	2017	10.1098/rsta.2016.0398	Article	English		Lozada Aguilar, Miguel Ángel; Khrennikov, Andrei; Oleschko, Klaudia; de Jesús Correa, María
46	Salt Marsh Bacterial Communities before and after the Deepwater Horizon Oil Spill.	2017	10.1128/aem.00784-17	Article	English		Engel, Annette Summers; Liu, Chang; Paterson, Audrey T.; Anderson, Laurie C.; Turner, R. Eugene; Overton, Edward B.
47	Chemical dispersants enhance the activity of oil- and gas condensate-degrading marine bacteria.	2017	10.1038/ismej.2017.129	Article	English		Tremblay, Julien; Yergeau, Etienne; Fortin, Nathalie; Cobanli, Susan; Elias, Miria; King, Thomas L; Lee, Kenneth; Greer, Charles W
48	Five Fatty Aldehyde Dehydrogenase Enzymes from Marinobacter and Acinetobacter spp. and Structural Insights into the Aldehyde Binding Pocket.	2017	10.1128/aem.00018-17	Article	English		Bertram, Jonathan H.; Mulliner, Kalene M.; Shi, Ke; Plunkett, Mary H.; Nixon, Peter; Serratore, Nicholas A.; Douglas, Christopher J.; Aihara, Hideki; Barney, Brett M.
49	Potential Metabolic Activation of a Representative C4-Alkylated Polycyclic Aromatic Hydrocarbon Retene (1-Methyl-7-isopropyl-phenanthrene) Associated with the Deepwater Horizon Oil Spill in Human Hepatoma (HepG2) Cells.	2017	10.1021/acs.chemrestox.6b00457	Article	English		Huang, Meng; Mesaros, Clementina; Hackfeld, Linda C.; Hodge, Richard P.; Zang, Tianzhu; Blair, Ian A.; Penning, Trevor M.
50	Quorum Sensing Influences Burkholderia thailandensis Biofilm Development and Matrix Production.	2016	10.1128/jb.00047-16	Article	English		Tseng, Boo Shan; Majerczyk, Charlotte D.; Passos da Silva, Daniel; Chandler, Josephine R.; Greenberg, E. Peter; Parsek, Matthew R.
51	Implications of Limited Thermophilicity of Nitrite Reduction for Control of Sulfide Production in Oil Reservoirs.	2016	10.1128/aem.00599-16	Article	English		Fida, Tekle Tafese; Chen, Chuan; Okpala, Gloria; Voordouw, Gerrit
52	Genome-Resolved Metagenomic Analysis Reveals Roles for Candidate Phyla and Other Microbial Community Members in Biogeochemical Transformations in Oil Reservoirs.	2016	10.1128/mbio.01669-15	Article	English		Hu, Ping; Tom, Lauren; Singh, Andrea; Thomas, Brian C.; Baker, Brett J.; Piceno, Yvette M.; Andersen, Gary L.; Banfield, Jillian F.
53	Ethical Issues in Environmental Health Research Related to Public Health Emergencies: Reflections on the GuLF STUDY.	2015	10.1289/ehp.1509889	Article	English		Resnik, David B.; Miller, Aubrey K.; Kwok, Richard K.; Engel, Lawrence S.; Sandler, Dale P.
54	Viral Source-Independent High Susceptibility of Dendritic Cells to Human T-Cell Leukemia Virus Type 1 Infection Compared to That of T Lymphocytes.	2015	10.1128/jvi.01799-15	Article	English		Alais, Sandrine; Mahieux, Renaud; Dutartre, Hélène
55	Clostridium clariflavum: Key Cellulosome Players Are Revealed by Proteomic Analysis.	2015	10.1128/mbio.00411-15	Article	English		Artzi, Lior; Morag, Ely; Barak, Yoav; Lamed, Raphael; Bayer, Edward A.
56	Microbial transformation of the Deepwater Horizon oil spill—past, present, and future perspectives.	2014	10.3389/fmicb.2014.00603	Review	English		Kimes, Nikole E.; Callaghan, Amy V.; Suflita, Joseph M.; Morris, Pamela J.
57	Single-cell genomics reveals features of a Colwellia species that was dominant during the Deepwater Horizon oil spill.	2014	10.3389/fmicb.2014.00332	Article	English		Mason, Olivia U.; Han, James; Woyke, Tanja; Jansson, Janet K.
58	Functional Genomics with a Comprehensive Library of Transposon Mutants for the Sulfate-Reducing Bacterium Desulfovibrio alaskensis G20.	2014	10.1128/mbio.01041-14	Article	English		Kuehl, Jennifer V.; Price, Morgan N.; Ray, Jayashree; Wetmore, Kelly M.; Esquivel, Zuelma; Kazakov, Alexey E.; Nguyen, Michelle; Kuehn, Raquel; Davis, Ronald W.; Hazen, Terry C.; Arkin, Adam P.; Deutschbauer, Adam
59	Genetic basis for nitrate resistance in Desulfovibrio strains.	2014	10.3389/fmicb.2014.00153	Article	English		Korte, Hannah L.; Fels, Samuel R.; Christensen, Geoff A.; Price, Morgan N.; Kuehl, Jennifer V.; Zane, Grant M.; Deutschbauer, Adam M.; Arkin, Adam P.; Wall, Judy D.
60	Health and exposures of United Kingdom Gulf war veterans. Part II: The relation of health to exposure.		10.1136/oem.58.5.299	Article	English		Cherry, N; Creed, F; Silman, A; Dunn, G; Baxter, D; Smedley, J; Taylor, S; Macfarlane, G

## Sheet: Without DOI
Item	Title	Year	DOI	Document Type	Language	Cited By	Author(s)

## Sheet: Duplicates
Item	Title	Year	DOI	Document Type	Language	Cited By	Author(s)	Duplicate Type
