# Supplementary material for: Metabolically Active Microbial Communities in Oilfields: A Systematic Review and Synthesis of RNA Preservation, Extraction, and Sequencing Methods
Source: MDPI journal article supplement (doi:10.3390/applmicrobiol3040079), 2023-10-06
Supplement: s1 [file s1 › Table S2_Search terms.pdf]

**Supplementary Table S2. Terms used in the search for records in databases, and selection of documents by automation tools.**

|                                                                                           | Search terms                                                                                                                                                                                                                                                                                                                                                                                                                                                                                                                                                                                                                |
|-------------------------------------------------------------------------------------------|-----------------------------------------------------------------------------------------------------------------------------------------------------------------------------------------------------------------------------------------------------------------------------------------------------------------------------------------------------------------------------------------------------------------------------------------------------------------------------------------------------------------------------------------------------------------------------------------------------------------------------|
| Identifying records in databases (MEDLINE/PubMed; PubMed Central; Scopus; Web of Science) | ((petroleum OR (“crude oil”) OR oil OR deposit OR biofilm OR (“production water”) OR (“produced water”) OR (“injection water”) OR (“injected water”) OR (“fossil water”) OR (“interstitial water”) OR (“formation water”) OR (“connate water”)) AND (reservoir OR oilfield OR (“oil well”) OR (“production well”) OR (“injection well”) OR (“production facility”) OR (“offshore platform”) OR (“onshore platform”)) AND (RNA OR metabolic* OR (“active microorganism”) OR (“active bacteria”) OR (“active community”) OR (“active microbiota”) OR (“gene expression”) OR transcriptom* OR metatranscriptom* OR transcri*)) |
| Document selection by automation tools <sup>1</sup> (screening in methodology section)    | RNA and petroleum OR crude oil OR oil OR deposit OR biofilm OR sediment OR production water OR produced water OR injection water OR injected water OR fossil water OR interstitial water OR formation water OR connate water                                                                                                                                                                                                                                                                                                                                                                                                |

Terms were combined using boolean operators “OR” and “AND”.

The database identifies the variation of terms using an asterisk (\*). metabolic\* (1) metabolic or (2) metabolically; transcri\*: (1) transcribed; (2) transcripts; (3) transcription; transcriptom\*: (1) transcriptome; (2) transcriptomes; (3) transcriptomics; (4) transcriptomics; metatranscriptom\*: (1) metatranscriptome; (2) metatranscriptomes; (3) metatranscriptomics; (4) metatranscriptomics

<sup>1</sup> script search\_keywords.py (<https://github.com/lbmcf/search-keywords>)
