# Supplementary material for: Metabolically Active Microbial Communities in Oilfields: A Systematic Review and Synthesis of RNA Preservation, Extraction, and Sequencing Methods
Source: MDPI journal article supplement (doi:10.3390/applmicrobiol3040079), 2023-10-06
Supplement: s1 [file s1 › Table S3. Scopus ((title or abstract or keyword)_1650 records_20.01.2023.csv]

Authors	Author(s) ID	Title	Year	Source title	Cited by	DOI	Link	Author Keywords	Language of Original Document	Document Type	Publication Stage	Open Access	Source	EID
Bian Z., Chen Y., Zhi Z., Wei L., Wu H., Wu Y.	57225010084;58024856200;58024856300;58024856400;7405579933;57277222300;	Comparison of microbial community structures between oil and water phases in a low-permeability reservoir after water flooding	2023	Energy Reports		10.1016/j.egyr.2022.12.026	https://www.scopus.com/inward/record.uri?eid=2-s2.0-85144338331&doi=10.1016%2fj.egyr.2022.12.026&partnerID=40&md5=5d66efdab68b9c71bb0873c108a64901	Low-permeability reservoir; Microbial community; Microbial enhanced oil recovery; Water flooding	English	Article	Final	All Open Access, Gold	Scopus	2-s2.0-85144338331
Li S., Gao H., Zhang H., Wei G., Shu Q., Li R., Jin S., Na G., Shi Y.	57205372554;55781711500;57390683000;58010669400;57417415400;57056678600;57201339713;22951183900;8972781600;	The fate of antibiotic resistance genes in the coastal lagoon with multiple functional zones	2023	Journal of Environmental Sciences (China)		10.1016/j.jes.2022.07.021	https://www.scopus.com/inward/record.uri?eid=2-s2.0-85143976780&doi=10.1016%2fj.jes.2022.07.021&partnerID=40&md5=357c15e56aa2fc76dd2796adaedf1026	Antibiotic resistance genes; Coastal lagoon; High-throughput qPCR; Influence factors; Multifunctional zones	English	Article	Final		Scopus	2-s2.0-85143976780
Prajapat G., Jain S., Lal B., Lavania M., Agrawal A.	57194216129;57194284773;57999228700;12808889500;42860991800;	Control of reservoir souring by incomplete nitrate reduction in Indian oil fields	2023	Bioresource Technology Reports		10.1016/j.biteb.2022.101302	https://www.scopus.com/inward/record.uri?eid=2-s2.0-85143658444&doi=10.1016%2fj.biteb.2022.101302&partnerID=40&md5=8c3ec081a5bde0438b347ee0a9e54908	Nitrate-reducing bacteria; Nitrite reductase; Souring; Sulfate-reducing bacteria; Tepidiphilus	English	Article	Final		Scopus	2-s2.0-85143658444
Nguyen N.H.A., Marlita M., El-Temsah Y.S., Hrabak P., Riha J., Sevcu A.	57812810900;57491618100;54580888300;56562848200;57355008700;54581657600;	Early stage biofilm formation on bio-based microplastics in a freshwater reservoir	2023	Science of the Total Environment		10.1016/j.scitotenv.2022.159569	https://www.scopus.com/inward/record.uri?eid=2-s2.0-85141295095&doi=10.1016%2fj.scitotenv.2022.159569&partnerID=40&md5=9cf5091b10551f667452538c7a30aa61	Abundant bacteria; HDPE; In-situ; Low-abundance bacteria; PHBV; PLA	English	Article	Final		Scopus	2-s2.0-85141295095
Sathiyamoorthi E., Faleye O.S., Lee J.-H., Lee J.	56543750100;57226794027;57927977500;13102945300;	Hydroquinone derivatives attenuate biofilm formation and virulence factor production in Vibrio spp	2023	International Journal of Food Microbiology		10.1016/j.ijfoodmicro.2022.109954	https://www.scopus.com/inward/record.uri?eid=2-s2.0-85139836359&doi=10.1016%2fj.ijfoodmicro.2022.109954&partnerID=40&md5=292179919a6cd8bcd4b4fba0e8d4962d	Antibacterial; Antibiofilm; Hydroquinone derivatives; Vibrio harveyi; Vibrio parahaemolyticus; Virulence factors	English	Article	Final		Scopus	2-s2.0-85139836359
Chifflet S., Briant N., Tesán-Onrubia J.A., Zaaboub N., Amri S., Radakovitch O., Bǎnaru D., Tedetti M.	22978463100;55616701500;57217056412;11239558500;57213194880;6603451872;21733403200;23989371700;	Distribution and accumulation of metals and metalloids in planktonic food webs of the Mediterranean Sea (MERITE-HIPPOCAMPE campaign)	2023	Marine Pollution Bulletin		10.1016/j.marpolbul.2022.114384	https://www.scopus.com/inward/record.uri?eid=2-s2.0-85145492104&doi=10.1016%2fj.marpolbul.2022.114384&partnerID=40&md5=805074825d090ede5fe6c920e7cf92a2	Biomagnification; Contamination; Mediterranean Sea; Metals and metalloids; Planktonic food webs	English	Article	Final	All Open Access, Bronze	Scopus	2-s2.0-85145492104
Lázaro-Mass S., Gómez-Cornelio S., Castillo-Vidal M., Alvarez-Villagomez C.S., Quintana P., De la Rosa-García S.	57489730100;55342931000;57970617900;57894191200;7004521997;56002691100;	Biodegradation of hydrocarbons from contaminated soils by microbial consortia: A laboratory microcosm study	2023	Electronic Journal of Biotechnology		10.1016/j.ejbt.2022.10.002	https://www.scopus.com/inward/record.uri?eid=2-s2.0-85142129595&doi=10.1016%2fj.ejbt.2022.10.002&partnerID=40&md5=5cbc84eb6c32a9883b03bc1c8d27cace	Biofilms; Bioremediation; Contaminated soils; Emulsifiers; Environmental impact; Hydrocarbons; Microbial consortium; Petrochemical industry; Pollution; Pseudomonas	English	Article	Final	All Open Access, Gold	Scopus	2-s2.0-85142129595
Fu H., Li Y., Su X., Yan D., Yang S., Wang G., Wang X., Zhao W.	56816151400;57430830100;7402181848;8357575000;37051665000;56541937300;56048939800;57203835158;	Environmental conditions and mechanisms restricting microbial methanogenesis in the Miquan region of the southern Junggar Basin, NW China	2023	Bulletin of the Geological Society of America	2	10.1130/B36272.1	https://www.scopus.com/inward/record.uri?eid=2-s2.0-85136513427&doi=10.1130%2fB36272.1&partnerID=40&md5=b1bf5f445e211414b75bbb17e72ec211		English	Article	Final		Scopus	2-s2.0-85136513427
Stemple B., Gulliver D., Tinker K., Sarkar P., Miller J., Bibby K.	57190839707;56119246600;57191956909;57218531045;57744904700;36087076200;	Evaluation of the Microbial Community and Geochemistry in Produced Waters Collected from CO2EOR in the Niagaran Pinnacle Reef	2022	ACS Earth and Space Chemistry		10.1021/acsearthspacechem.2c00247	https://www.scopus.com/inward/record.uri?eid=2-s2.0-85143056693&doi=10.1021%2facsearthspacechem.2c00247&partnerID=40&md5=4b48c53806aef6f6b061f20b37005243	biogeochemistry; carbon sequestration; CO2capture and storage; CO2EOR; produced water microbiology; subsurface microbiome	English	Article	Final		Scopus	2-s2.0-85143056693
Yun Y., Su T., Gui Z., Tian X., Chen Y., Cao Y., Yang S., Xie J., Anwar N., Li M., Li G., Ma T.	56956317600;57436302200;57224173289;57195411851;57210909133;57386519300;57387267200;57109613800;57181782800;57213423336;55711209100;55728800200;	Stress-responses of microbes in oil reservoir under high tetracycline exposure and their environmental risks	2022	Environmental Pollution		10.1016/j.envpol.2022.120355	https://www.scopus.com/inward/record.uri?eid=2-s2.0-85139829117&doi=10.1016%2fj.envpol.2022.120355&partnerID=40&md5=0cc452362e27687f824d581a3f69b9a4	Antibiotic resistance genes; Antibiotics; Ecosystem functioning; HGT; Microbial community; Oil reservoir	English	Article	Final		Scopus	2-s2.0-85139829117
Salomone-González D., Curto-Risso P.L., Calvo Hernández A., Medina A., Roco J.M.M., Gonzalez-Ayala J.	57219434562;25822058600;57210411550;7202723574;6603722308;55662726500;	Pumped heat energy storage with liquid media: Thermodynamic assessment by a transcritical Rankine-like model	2022	Journal of Energy Storage	1	10.1016/j.est.2022.105966	https://www.scopus.com/inward/record.uri?eid=2-s2.0-85141332043&doi=10.1016%2fj.est.2022.105966&partnerID=40&md5=8f3f9cef0ebf2288e1f90a3d982bd0a3	Coupled transcritical Rankine model; Energy storage; Heat leak; Internal and external irreversibilities; Round trip efficiency; Water storage	English	Article	Final	All Open Access, Hybrid Gold, Green	Scopus	2-s2.0-85141332043
Levipan H.A., Irgang R., Opazo L.F., Araya-León H., Avendaño-Herrera R.	6503996315;56780088100;24466804600;57971599600;6603103236;	Collective behavior and virulence arsenal of the fish pathogen Piscirickettsia salmonis in the biofilm realm	2022	Frontiers in Cellular and Infection Microbiology		10.3389/fcimb.2022.1067514	https://www.scopus.com/inward/record.uri?eid=2-s2.0-85144204277&doi=10.3389%2ffcimb.2022.1067514&partnerID=40&md5=37353bfbfa54b9a7d76f3f7962e6357f	aquaculture; biofilm cell viability; cytotoxicity; exopolymeric matrix; piscirickettsiosis; RNA sequencing; virulence	English	Article	Final	All Open Access, Gold, Green	Scopus	2-s2.0-85144204277
Lin Q., Huang J., Liu Z., Chen Q., Wang X., Yu G., Cheng P., Zhang L.-H., Xu Z.	57217218008;57217216792;57217219893;57773860500;58027392400;57773962800;57773912200;8599921900;57192108781;	tRNA modification enzyme MiaB connects environmental cues to activation of Pseudomonas aeruginosa type III secretion system	2022	PLoS Pathogens		10.1371/journal.ppat.1011027	https://www.scopus.com/inward/record.uri?eid=2-s2.0-85144585082&doi=10.1371%2fjournal.ppat.1011027&partnerID=40&md5=6ad115527f43fceac3b9e6d2746c3792		English	Article	Final	All Open Access, Gold, Green	Scopus	2-s2.0-85144585082
Wu M., Liu Z., Gao H., Gao J., Xu Y., Ou Y.	55490921500;57275493500;57213813512;57912062900;57239309300;57912063000;	Assessment of bioremediation potential of petroleum-contaminated soils from the shanbei oilfield of China revealed by qPCR and high throughput sequencing	2022	Chemosphere		10.1016/j.chemosphere.2022.136446	https://www.scopus.com/inward/record.uri?eid=2-s2.0-85139030658&doi=10.1016%2fj.chemosphere.2022.136446&partnerID=40&md5=3b176938327aa88c3118fe0c435cd72a	Bioremediation potential; Crude oil spills; High throughput sequencing; qPCR; Soil pollution	English	Article	Final		Scopus	2-s2.0-85139030658
Zhao R., Wang B., Li D., Chen Y., Zhang Q.	57890255900;57316214800;57891387700;57324817900;57200517953;	Effect of sulfate-reducing bacteria from salt scale of water flooding pipeline on corrosion behavior of X80 steel	2022	Engineering Failure Analysis		10.1016/j.engfailanal.2022.106788	https://www.scopus.com/inward/record.uri?eid=2-s2.0-85138026147&doi=10.1016%2fj.engfailanal.2022.106788&partnerID=40&md5=5f81062d470a7ba630f0fe78dd6cabd7	CaCO3 scale layer; Combined effect; Microbial corrosion; Sulfate-reducing bacteria (SRB); X80 steel pipeline	English	Article	Final		Scopus	2-s2.0-85138026147
Al-Momani H., Perry A., Nelson A., Stewart C.J., Jones R., Krishnan A., Robertson A., Bourke S., Doe S., Cummings S., Anderson A., Forrest T., Forrest I., Griffin M., Wilcox M., Brodlie M., Pearson J., Ward C.	57189596723;55488864900;57276149400;56124077800;57148981200;57192107891;57201926438;7006826656;8918633000;7201936559;57189592801;57189587963;7005086199;55959376100;35590886000;6508166409;35513319800;57196516302;	Exposure to bile and gastric juice can impact the aerodigestive microbiome in people with cystic fibrosis	2022	Scientific Reports		10.1038/s41598-022-15375-4	https://www.scopus.com/inward/record.uri?eid=2-s2.0-85133247499&doi=10.1038%2fs41598-022-15375-4&partnerID=40&md5=47616df34c1b7b535504a6b5fd1da52f		English	Article	Final	All Open Access, Gold, Green	Scopus	2-s2.0-85133247499
Álvarez-Marín M.T., Zarzuela L., Camacho E.M., Santero E., Flores A.	57771740300;57863371600;7005738803;7004271045;21034170000;	Detection by metagenomic functional analysis and improvement by experimental evolution of β-lactams resistance genes present in oil contaminated soils	2022	Scientific Reports		10.1038/s41598-022-13883-x	https://www.scopus.com/inward/record.uri?eid=2-s2.0-85133135662&doi=10.1038%2fs41598-022-13883-x&partnerID=40&md5=52c41c8b069e28e68f31d76be46c2261		English	Article	Final	All Open Access, Gold, Green	Scopus	2-s2.0-85133135662
Vidal-Verdú À., Gómez-Martínez D., Latorre-Pérez A., Peretó J., Porcar M.	57211354221;57484121000;57202210517;6602308417;6602754631;	The car tank lid bacteriome: a reservoir of bacteria with potential in bioremediation of fuel	2022	npj Biofilms and Microbiomes	1	10.1038/s41522-022-00299-8	https://www.scopus.com/inward/record.uri?eid=2-s2.0-85128929440&doi=10.1038%2fs41522-022-00299-8&partnerID=40&md5=58a099e7f99a6078e71176319dee1cdf		English	Article	Final	All Open Access, Gold, Green	Scopus	2-s2.0-85128929440
El Joumaa M.M., Borjac J.M.	57210553195;57194390006;	Matricaria chamomilla: A valuable insight into recent advances in medicinal uses and pharmacological activities	2022	Phytochemistry Reviews	2	10.1007/s11101-022-09817-0	https://www.scopus.com/inward/record.uri?eid=2-s2.0-85127584070&doi=10.1007%2fs11101-022-09817-0&partnerID=40&md5=6f259153d7699a4d9a253d2bd65b30a9	Bioactive compounds; Matricaria chamomilla; Pharmacological activities; Phytochemical constituents; Traditional medicine	English	Review	Final		Scopus	2-s2.0-85127584070
Kar J., Ramrao D.P., Zomuansangi R., Lalbiaktluangi C., Singh S.M., Joshi N.C., Kumar A., Kaushalendra, Mehta S., Yadav M.K., Singh P.K.	57993594600;57222086299;57221380108;57993759900;24523775100;55948005900;57219037070;55214025900;57993107500;7102892913;57275979600;	Revisiting the role of cyanobacteria-derived metabolites as antimicrobial agent: A 21st century perspective	2022	Frontiers in Microbiology		10.3389/fmicb.2022.1034471	https://www.scopus.com/inward/record.uri?eid=2-s2.0-85143328392&doi=10.3389%2ffmicb.2022.1034471&partnerID=40&md5=ee4b9616e2bff0dba54da02096cadb91	antimicrobial; bioactivity; cyanobacteria; metabolites; signaling	English	Review	Final	All Open Access, Gold, Green	Scopus	2-s2.0-85143328392
Huang Z., Huang Y., Chen J., Tang Z., Chen Y., Liu H., Huang M., Qing L., Li L., Wang Q., Jia B.	57907929200;57318550300;57777706900;57362445700;57362239400;57362445800;57362239500;57760455100;57780989000;57211996023;57191749682;	The role and therapeutic potential of gut microbiome in severe burn	2022	Frontiers in Cellular and Infection Microbiology		10.3389/fcimb.2022.974259	https://www.scopus.com/inward/record.uri?eid=2-s2.0-85143309310&doi=10.3389%2ffcimb.2022.974259&partnerID=40&md5=4508a65462c5181c2d23ae45aedc0a5d	dysbiosis; gut microbiome; intestinal mucosal barrier; microbial therapy; severe burn	English	Review	Final	All Open Access, Gold, Green	Scopus	2-s2.0-85143309310
Wilson A., Fegan N., Turner M.S.	57205989290;6603831788;7403215473;	Co-culture with Acinetobacter johnsonii enhances benzalkonium chloride resistance in Salmonella enterica via triggering lipid A modifications	2022	International Journal of Food Microbiology		10.1016/j.ijfoodmicro.2022.109905	https://www.scopus.com/inward/record.uri?eid=2-s2.0-85138822176&doi=10.1016%2fj.ijfoodmicro.2022.109905&partnerID=40&md5=afa9e00e279b594bded67efb745b3fc7	Biofilm; Disinfectant resistance; Egg production; Food safety; Lipid A; Salmonella enterica	English	Article	Final		Scopus	2-s2.0-85138822176
Liu K., Xie S., Li Z., Sun B.	57609071800;57222467689;57608010600;56412330800;	Effects of Salt Concentration on the Microbial Diversity and Quality of Red Cabbage during Natural Fermentation [盐度对紫甘蓝自然发酵过程中细菌多样性及品质的影响]	2022	Journal of Chinese Institute of Food Science and Technology		10.16429/j.1009-7848.2022.11.039	https://www.scopus.com/inward/record.uri?eid=2-s2.0-85145007023&doi=10.16429%2fj.1009-7848.2022.11.039&partnerID=40&md5=b27b9f5f31fc0b44d65bceca22a1adfe	microbial diversity; natural fermentation; quality; red cabbage sauerkraut; salt concentration	Chinese	Article	Final		Scopus	2-s2.0-85145007023
Bai J.-L., Li C.-H., Gong Y.-A., Wang Y.-H.	36086091200;57902467600;57902678200;55697621200;	DYNAMIC RESPONSE ANALYSIS OF OFFSHORE WIND TURBINE CONSIDERING ROTOR-NACELLE ASSEMBLY (RNA) OPERATION [考虑 RNA 运行作用的近海风电结构动力响应分析]	2022	Gongcheng Lixue/Engineering Mechanics		10.6052/j.issn.1000-4750.2021.06.0453	https://www.scopus.com/inward/record.uri?eid=2-s2.0-85142368112&doi=10.6052%2fj.issn.1000-4750.2021.06.0453&partnerID=40&md5=2aa8859da5682e144deec8ab9c1bc982	aerodynamic load; dynamic response; offshore wind turbine; RNA operation effect; wave load; wind-wave correlation	Chinese	Article	Final		Scopus	2-s2.0-85142368112
Ren L., Wang Z., Zhao J., Wu J., Lin R., Wu J., Fu Y., Tang D.	35194598100;57408058100;8720831200;57270931900;56415557900;55704981300;55507329400;57907614300;	Shale gas load recovery modeling and analysis after hydraulic fracturing based on genetic expression programming: A case study of southern Sichuan Basin shale	2022	Journal of Natural Gas Science and Engineering	1	10.1016/j.jngse.2022.104778	https://www.scopus.com/inward/record.uri?eid=2-s2.0-85138771746&doi=10.1016%2fj.jngse.2022.104778&partnerID=40&md5=0860c9bb2fead05f135aff13b9e543c1	Data analysis; Gene expression programming (GEP); Hydraulic fracturing; Load recovery model; Main controlling factor; Shale gas	English	Article	Final		Scopus	2-s2.0-85138771746
Fan K., Feng Q., Li K., Lin J., Wang W., Cao Y., Gai H., Song H., Huang T., Zhu Q., Xiao M.	57221228757;57206934970;56988117900;56331723200;56969961600;27171578500;15839534500;57040192200;57192365631;56342278800;35772667500;	The metabolism of pyrene by a novel Altererythrobacter sp. with in-situ co-substrates: A mechanistic analysis based on pathway, genomics, and enzyme activity	2022	Chemosphere		10.1016/j.chemosphere.2022.135784	https://www.scopus.com/inward/record.uri?eid=2-s2.0-85135419781&doi=10.1016%2fj.chemosphere.2022.135784&partnerID=40&md5=960fea3ec47dd5cc295ea45f2d772407	Altererythrobacter sp.; Co-substrate; Degradation pathways; High molecular weight polycyclic aromatic hydrocarbons; Whole genome	English	Article	Final		Scopus	2-s2.0-85135419781
Al-Ghamdi A., Haq B., Al-Shehri D., Muhammed N.S., Mahmoud M.	57759280300;37054005300;6506755203;57219573052;35792348900;	Surfactant formulation for Green Enhanced Oil Recovery	2022	Energy Reports	1	10.1016/j.egyr.2022.05.293	https://www.scopus.com/inward/record.uri?eid=2-s2.0-85132526141&doi=10.1016%2fj.egyr.2022.05.293&partnerID=40&md5=15164960cb91764621b9793acb8139db	Bio-surfactants; Green Enhanced Oil Recovery; Green surfactants; Rhamnolipids	English	Article	Final	All Open Access, Gold	Scopus	2-s2.0-85132526141
Buda J., Poniecka E.A., Rozwalak P., Ambrosini R., Bagshaw E.A., Franzetti A., Klimaszyk P., Nawrot A., Pietryka M., Richter D., Zawierucha K.	57195292228;57204185968;57310937100;57188996262;23670027500;57216729351;11141931000;57172669800;14047203100;14047418000;54894373600;	Is Oxygenation Related to the Decomposition of Organic Matter in Cryoconite Holes?	2022	Ecosystems	1	10.1007/s10021-021-00729-2	https://www.scopus.com/inward/record.uri?eid=2-s2.0-85121396595&doi=10.1007%2fs10021-021-00729-2&partnerID=40&md5=c60cf5e01d1dfad15652be031a0ab754	aerobic; anaerobic; decay; glacier; photoautotrophs; supraglacial	English	Article	Final	All Open Access, Hybrid Gold, Green	Scopus	2-s2.0-85121396595
Gao P., Li Y., Tian H., Li G., Zhao F., Xia W., Pan X., Gu J.-D., Le J., Jia C., Ma T.	45960926300;57211257237;56000719700;55711209100;57201304059;36660199100;57356213300;7403129601;25225817600;57676565500;55728800200;	Bacterial and Archaeal Community Distribution in Oilfield Water Re-injection Facilities and the Influences from Microorganisms in Injected Water	2022	Microbial Ecology	1	10.1007/s00248-021-01933-2	https://www.scopus.com/inward/record.uri?eid=2-s2.0-85120052555&doi=10.1007%2fs00248-021-01933-2&partnerID=40&md5=b0bb46854e46a2cceb74a8e441d37660	Microbial community; Microbial transfer; Microbial-enhanced oil recovery; Petroleum reservoir; Water re-injection facilities	English	Article	Final		Scopus	2-s2.0-85120052555
Guzman-Otazo J., Joffré E., Agramont J., Mamani N., Jutkina J., Boulund F., Hu Y.O.O., Jumilla-Lorenz D., Farewell A., Larsson D.G.J., Flach C.-F., Iñiguez V., Sjöling A.	57205421959;55891293600;57208008972;23477393800;36164152500;55513403700;57961796800;57960507500;6603731728;57219084623;8599173200;26531390200;6602400256;	Conjugative transfer of multi-drug resistance IncN plasmids from environmental waterborne bacteria to Escherichia coli	2022	Frontiers in Microbiology		10.3389/fmicb.2022.997849	https://www.scopus.com/inward/record.uri?eid=2-s2.0-85141687568&doi=10.3389%2ffmicb.2022.997849&partnerID=40&md5=0358b3931ff0c161b10aba7da7749d2c	conjugative plasmid transfer; copper sulfate; Escherichia coli; horizontal gene transfer; IncN plasmid; multi-drug resistance; waterborne bacteria; zinc sulfate	English	Article	Final	All Open Access, Gold, Green	Scopus	2-s2.0-85141687568
Lemieux A., Colby G.A., Poulain A.J., Aris-Brosou S.	57272884300;57189978188;7801331739;14046700900;	Viral spillover risk increases with climate change in High Arctic lake sediments	2022	Proceedings of the Royal Society B: Biological Sciences		10.1098/rspb.2022.1073	https://www.scopus.com/inward/record.uri?eid=2-s2.0-85140156830&doi=10.1098%2frspb.2022.1073&partnerID=40&md5=bb4690ceb29e5d21ce1bda3642ca3cb5	cophylogeny; High Arctic; host restrictions; spillovers; viral metagenomics	English	Article	Final	All Open Access, Hybrid Gold, Green	Scopus	2-s2.0-85140156830
Chen Z., Fei Y.-H., Liu W.-S., Ding K., Lu J., Cai X., Cui T., Tang Y.-T., Wang S., Chao Y., Qiu R.	57204769595;43061079900;55994021500;57191480312;57911180800;57910981000;57911777000;9232620500;38663557700;57201260816;53871754900;	Untangling microbial diversity and assembly patterns in rare earth element mine drainage in South China	2022	Water Research		10.1016/j.watres.2022.119172	https://www.scopus.com/inward/record.uri?eid=2-s2.0-85139027874&doi=10.1016%2fj.watres.2022.119172&partnerID=40&md5=4b7b4f118ea0c5a23fbdd567635e22f5	Assembly pattern; Co-occurrence network; Fungal community; Mine microbiome; Prokaryotic community; Rare earth element (REE)	English	Article	Final		Scopus	2-s2.0-85139027874
Liu X., He L., Zhang X., Kong D., Chen Z., Lin J., Wang C.	40461899100;57851156800;42662564100;57202130763;57851575800;57851575900;39763136700;	Bioremediation of petroleum-contaminated saline soil by Acinetobacter baumannii and Talaromyces sp. and functional potential analysis using metagenomic sequencing	2022	Environmental Pollution		10.1016/j.envpol.2022.119970	https://www.scopus.com/inward/record.uri?eid=2-s2.0-85136310278&doi=10.1016%2fj.envpol.2022.119970&partnerID=40&md5=1309351941861043e14d1c664a30d9a2	Biodegradation; Co-culture of bacteria-fungi; Functional genes; Metagenomic analysis; Microbial community	English	Article	Final		Scopus	2-s2.0-85136310278
Abdelsamad R., Al Disi Z., Abu-Dieyeh M., Al-Ghouti M.A., Zouari N.	57964020300;57191291292;12042468400;23048725500;57206755405;	Evidencing the role of carbonic anhydrase in the formation of carbonate minerals by bacterial strains isolated from extreme environments in Qatar	2022	Heliyon		10.1016/j.heliyon.2022.e11151	https://www.scopus.com/inward/record.uri?eid=2-s2.0-85141857023&doi=10.1016%2fj.heliyon.2022.e11151&partnerID=40&md5=e93fc8f5a982c799719408da6bd31863	Carbonate formation; Carbonic anhydrase; Extreme environments; Marine sediments; Sabkha; Virgibacillus	English	Article	Final	All Open Access, Gold, Green	Scopus	2-s2.0-85141857023
Sheik C.S., Natwora K.E., Alexson E.E., Callaghan J.D., Sailer A., Schreiner K.M., Steinman B.A., Finkenbinder M.S., Filstrup C.T., Bramburger A.J.	24765192700;57226292495;57199714371;57857427800;57858852800;36710729100;36651650500;56024010900;14828725000;13410390200;	Dolichospermum blooms in Lake Superior: DNA-based approach provides insight to the past, present and future of blooms	2022	Journal of Great Lakes Research	1	10.1016/j.jglr.2022.08.002	https://www.scopus.com/inward/record.uri?eid=2-s2.0-85136543264&doi=10.1016%2fj.jglr.2022.08.002&partnerID=40&md5=d6a07bc230b1950715285df24ba0c249	Cyanobacteria blooms; Dolichospermum; Lake Superior; Laurentian Great Lakes; Metagenomics; Pangenome	English	Article	Final	All Open Access, Hybrid Gold	Scopus	2-s2.0-85136543264
Nammoura Neto G.M., Almeida R.N.A., Schneider R.P.	41262319500;57844008900;35596420200;	Improved rRNA extraction from biofouling and bioreactor samples	2022	International Biodeterioration and Biodegradation		10.1016/j.ibiod.2022.105481	https://www.scopus.com/inward/record.uri?eid=2-s2.0-85135901197&doi=10.1016%2fj.ibiod.2022.105481&partnerID=40&md5=3cd00693eae2feb755cdb8e324d4d1ad	Activated sludge; Biofouling; Environmental microbial community analysis; rRNA extraction; RT-PCR	English	Article	Final		Scopus	2-s2.0-85135901197
Mahdaviara M., Sharifi M., Ahmadi M.	57214839505;55441652200;57202593124;	Toward evaluation and screening of the enhanced oil recovery scenarios for low permeability reservoirs using statistical and machine learning techniques	2022	Fuel	1	10.1016/j.fuel.2022.124795	https://www.scopus.com/inward/record.uri?eid=2-s2.0-85132763515&doi=10.1016%2fj.fuel.2022.124795&partnerID=40&md5=0777751f1eac238e03b80f0cb726aa8a	Analogous study; Enhanced oil recovery (EOR); EOR screening; Low permeability reservoirs	English	Article	Final		Scopus	2-s2.0-85132763515
Yao X., Zhao Z., Wang J., Ding Q., Ren M., Kimirei I.A., Zhang L.	56004194600;55726124900;57202341403;57221923534;57188653367;23088611000;55810552400;	Sediment organic matter properties facilitate understanding nitrogen transformation potentials in East African lakes	2022	Science of the Total Environment		10.1016/j.scitotenv.2022.156607	https://www.scopus.com/inward/record.uri?eid=2-s2.0-85132753440&doi=10.1016%2fj.scitotenv.2022.156607&partnerID=40&md5=9812738b63fb671f6389f5e67cf4c9e6	Denitrification; Dissimilatory nitrate reduction to ammonium (DNRA); East Africa; Lakes; Nitrogen mineralization; Sediment	English	Article	Final		Scopus	2-s2.0-85132753440
Dong H., Zhang F., Xu T., Liu Y., Du Y., Wang C., Liu T., Gao J., He Y., Wang X., Sun S., She Y.	56810032600;57226025167;57749637800;57225001169;57749774100;57749637900;57749360700;57749907400;55499054700;57829193400;23111564700;7006618632;	Culture-dependent and culture-independent methods reveal microbe-clay mineral interactions by dissimilatory iron-reducing bacteria in an integral oilfield	2022	Science of the Total Environment	2	10.1016/j.scitotenv.2022.156577	https://www.scopus.com/inward/record.uri?eid=2-s2.0-85132220959&doi=10.1016%2fj.scitotenv.2022.156577&partnerID=40&md5=3ee5d71a02b1d48df66fb5ee4a0e2043	Culture-dependent; Culture-independent; Flaviflexus; Iron reduction; MEOR; Tessaracoccus	English	Article	Final		Scopus	2-s2.0-85132220959
Li Y., Zhang Y., Xue S.	56434363200;57908668600;57747064100;	pH mediated assemblage of carbon, nitrogen, and sulfur related microbial communities in petroleum reservoirs	2022	Frontiers in Microbiology		10.3389/fmicb.2022.952285	https://www.scopus.com/inward/record.uri?eid=2-s2.0-85138876989&doi=10.3389%2ffmicb.2022.952285&partnerID=40&md5=305bdc102683e11d0d159350f25a4d93	co-occurrence network; degradation; functional communities; keystone taxa; petroleum acidification	English	Article	Final	All Open Access, Gold, Green	Scopus	2-s2.0-85138876989
Zhao F., Wang Y., Hu X., Huang X.	57201304059;57904361800;57904556900;57904144800;	How to simply and efficiently screen microbial strains capable of anaerobic biosynthesis of biosurfactants: Method establishment, influencing factors and application example evaluation	2022	Frontiers in Microbiology		10.3389/fmicb.2022.989998	https://www.scopus.com/inward/record.uri?eid=2-s2.0-85138707770&doi=10.3389%2ffmicb.2022.989998&partnerID=40&md5=6a1571b130c5d25156cedc0453cd4f4f	anoxic conditions; biosurfactants; environment; microplate assays; oil displacement circle; surface tension	English	Article	Final	All Open Access, Gold, Green	Scopus	2-s2.0-85138707770
Yang Y., Kong Q., Lim A.R.Q., Lu S., Zhao H., Guo L., Yuan L., Ma W.	57215012683;55805553200;57438829300;55537050000;56510458100;55264194900;35235813800;56302098400;	Transcriptional regulation of oil biosynthesis in seed plants: Current understanding, applications, and perspectives	2022	Plant Communications	7	10.1016/j.xplc.2022.100328	https://www.scopus.com/inward/record.uri?eid=2-s2.0-85130348772&doi=10.1016%2fj.xplc.2022.100328&partnerID=40&md5=dcc268ece782ca4e4c4c729759a64e7b	environmental and developmental signals; oil accumulation; plant oil biosynthesis; seed development; transcription factor; transcriptional regulation	English	Review	Final	All Open Access, Gold, Green	Scopus	2-s2.0-85130348772
Wu Y., Qi D., Yao H., Ren J., Hu J., Lyu Y., Yang S., Sun W.	57481435800;57355731100;35276518200;57481466600;57195994862;57254198300;57481370700;57314063400;	Antibiotic resistome and its driving factors in an urban river in northern China	2022	Science of the Total Environment	3	10.1016/j.scitotenv.2022.156536	https://www.scopus.com/inward/record.uri?eid=2-s2.0-85132115912&doi=10.1016%2fj.scitotenv.2022.156536&partnerID=40&md5=0768319fdfe505b38122fa20bb0c4465	Antibiotic resistance genes; Driving factors; Mobile genetic elements; Urban river	English	Article	Final		Scopus	2-s2.0-85132115912
Zhou L., Michelson K., Fried G., Sanford R.A., Sivaguru M., Bhattacharjee A.S., Deng J., Fouke B.W., Valocchi A.J., Werth C.J.	57936416400;56584207500;7102886839;35994346600;6602705709;56662767300;57206902065;6603830440;7003835248;7003984563;	Rates of Sulfate Reduction by Microbial Biofilms That Form on Shale Fracture Walls within a Microfluidic Testbed	2022	ACS ES and T Engineering		10.1021/acsestengg.2c00048	https://www.scopus.com/inward/record.uri?eid=2-s2.0-85140313279&doi=10.1021%2facsestengg.2c00048&partnerID=40&md5=2fb2431def2dcbe47c9cb7f3f660066c	biofilm; hydraulic fracturing; shale; sulfate reduction rate; sulfate-reducing bacteria	English	Article	Final		Scopus	2-s2.0-85140313279
Bai J., Li C., Gong Y., Wang Y., Zhu R.	36086091200;57902467600;57902678200;55697621200;57772870000;	Dynamic response analysis of offshore wind turbine under the coupling effects of wind, wave, current and RNA operation [风-浪-流-RNA 运行耦合作用下近海风电结构动态响应分析]	2022	Tumu Gongcheng Xuebao/China Civil Engineering Journal		10.15951/j.tmgcxb.21080804	https://www.scopus.com/inward/record.uri?eid=2-s2.0-85138611537&doi=10.15951%2fj.tmgcxb.21080804&partnerID=40&md5=087c9389fa27398e95ba81ad50fa9ffb	aerodynamic load; dynamic response; offshore wind turbine; RNA; wave load; wind-wave-current coupling	Chinese	Article	Final		Scopus	2-s2.0-85138611537
Hu M., Zhang F., Li G., Ruan H., Li X., Zhong L., Chen G., Rui Y.	57896563800;57896327500;57236478400;57896563900;57897757700;57198519500;57732296000;57896803300;	Falsochrobactrum tianjinense sp. nov., a New Petroleum-Degrading Bacteria Isolated from Oily Soils	2022	International Journal of Environmental Research and Public Health	1	10.3390/ijerph191811833	https://www.scopus.com/inward/record.uri?eid=2-s2.0-85138387349&doi=10.3390%2fijerph191811833&partnerID=40&md5=8a38d89db4c2bcbe471eb6dd9ab36867	bacteria; Falsochbactrum; hydrocarbon-degrading; oily soil	English	Article	Final	All Open Access, Gold, Green	Scopus	2-s2.0-85138387349
Chen J.-Y., Su Z.-G., Yao P.-C., Huang B., Zhang Y.-M., Wen D.-H.	57206859151;57206831927;57211947047;57191331585;55739889900;12241548400;	Effects of Wastewater Discharge on Antibiotic Resistance Genes and Microbial Community in a Coastal Area [废水排放对近海环境中抗生素抗性基因和微生物群落的影响]	2022	Huanjing Kexue/Environmental Science		10.13227/j.hjkx.202112272	https://www.scopus.com/inward/record.uri?eid=2-s2.0-85137729198&doi=10.13227%2fj.hjkx.202112272&partnerID=40&md5=4f6928c4401f54c7e5ec953451af16ed	antibiotic resistance genes (ARGs); coastal area; microbial community; mobile genetic elements (MGEs); wastewater discharge	Chinese	Article	Final		Scopus	2-s2.0-85137729198
Dengler L., Meier J., Grünberger F., Bellack A., Rachel R., Grohmann D., Huber H.	57196216440;57845548400;57210104670;35223017600;7003812119;24315024100;7202337056;	Methanofollis propanolicus sp. nov., a novel archaeal isolate from a Costa Rican oil well that uses propanol for methane production	2022	Archives of Microbiology	1	10.1007/s00203-022-03152-w	https://www.scopus.com/inward/record.uri?eid=2-s2.0-85136072802&doi=10.1007%2fs00203-022-03152-w&partnerID=40&md5=03cb70e22fb14d2dc3935a011c3757cd	Costa Rica; Methanogenesis; Methanomicrobiaceae; Oil well; Propanol	English	Article	Final	All Open Access, Hybrid Gold, Green	Scopus	2-s2.0-85136072802
Shi S., Zhai E., Xu C., Iqbal K., Sun Y., Wang S.	57208922416;57225208341;7404181752;57218214785;57193453645;57818836000;	Influence of Pile-Soil Interaction on Dynamic Properties and Response of Offshore Wind Turbine with Monopile Foundation in Sand Site	2022	Applied Ocean Research		10.1016/j.apor.2022.103279	https://www.scopus.com/inward/record.uri?eid=2-s2.0-85134880372&doi=10.1016%2fj.apor.2022.103279&partnerID=40&md5=4319d47df200cc96b50a808154aacdf0	Dynamic response; Natural frequency; Offshore wind turbine (OWT); Pile-soil interaction (PSI); Seismic response	English	Article	Final		Scopus	2-s2.0-85134880372
Sedlacko E.M., Heuberger A.L., Chaparro J.M., Cath T.Y., Higgins C.P.	56275564100;36099965000;55210060200;8629664900;8629429300;	Metabolomics reveals primary response of wheat (Triticum aestivum) to irrigation with oilfield produced water	2022	Environmental Research	1	10.1016/j.envres.2022.113547	https://www.scopus.com/inward/record.uri?eid=2-s2.0-85131382239&doi=10.1016%2fj.envres.2022.113547&partnerID=40&md5=08e1f045d456d039c60268382eff4a4f	Irrigation; Oil and gas; Plant metabolomics; Produced water; Water reuse; Wheat	English	Article	Final		Scopus	2-s2.0-85131382239
Usuda D., Tanaka R., Suzuki M., Shimozawa S., Takano H., Hotchi Y., Tokunaga S., Osugi I., Katou R., Ito S., Mishima K., Kondo A., Mizuno K., Takami H., Komatsu T., Oba J., Nomura T., Sugita M.	55883709000;57226679912;57226668723;57226679880;57847578900;57226674816;57226656907;57226670978;57226663238;57226675035;57848485300;57848034100;57191380676;57191380488;57847579000;57226661849;57848935800;57582133900;	Obligate aerobic, gram-positive, weak acid-fast, nonmotile bacilli, Tsukamurella tyrosinosolvens: Minireview of a rare opportunistic pathogen	2022	World Journal of Clinical Cases		10.12998/wjcc.v10.i24.8443	https://www.scopus.com/inward/record.uri?eid=2-s2.0-85136105046&doi=10.12998%2fwjcc.v10.i24.8443&partnerID=40&md5=d073a28a415d60595754d46c8bfc0c17	Combination antibiotic therapy; Gram-positive bacilli; Matrix-assisted laser desorption ionization time-of-flight mass spectrometry; Opportunistic infection; Sequence-based identification; Tsukamurella tyrosinosolvens	English	Article	Final	All Open Access, Gold, Green	Scopus	2-s2.0-85136105046
Williams N.L.R., Siboni N., McLellan S.L., Potts J., Scanes P., Johnson C., James M., McCann V., Seymour J.R.	57209099230;8851700200;7004044571;55036799900;6603532648;57672807100;57755423500;57755088800;7202401306;	Rainfall leads to elevated levels of antibiotic resistance genes within seawater at an Australian beach	2022	Environmental Pollution		10.1016/j.envpol.2022.119456	https://www.scopus.com/inward/record.uri?eid=2-s2.0-85132410733&doi=10.1016%2fj.envpol.2022.119456&partnerID=40&md5=18954ac9b3bf1986dd7c0d2cd4283437	Antimicrobial resistance; Sewage contamination; Water Quality; Water Safety	English	Article	Final		Scopus	2-s2.0-85132410733
Amiri N.A., Amiri F.A., Faravardeh L., Eslami A., Ghasemi A., Rafiee M.	57694503300;57695722700;14040076500;36023594300;57694993200;12774072800;	Enhancement of MBBR reactor efficiency using effective microorganism for treatment of wastewater containing diazinon by engineered Pseudomonas putida KT2440 with manganese peroxidase 2 gene	2022	Journal of Environmental Management	2	10.1016/j.jenvman.2022.115293	https://www.scopus.com/inward/record.uri?eid=2-s2.0-85130136494&doi=10.1016%2fj.jenvman.2022.115293&partnerID=40&md5=45eace69bb2bc756e66bc5ac11e49df3	Diazinon; Gene cloning; LC/MS; Manganese peroxidase 2; MBBR; Transgenic Pseudomonas putida KT2440	English	Article	Final		Scopus	2-s2.0-85130136494
Tinker K., Lipus D., Gardiner J., Stuckman M., Gulliver D.	57191956909;56403233800;57213962117;42862623100;56119246600;	The Microbial Community and Functional Potential in the Midland Basin Reveal a Community Dominated by Both Thiosulfate and Sulfate-Reducing Microorganisms	2022	Microbiology Spectrum		10.1128/spectrum.00049-22	https://www.scopus.com/inward/record.uri?eid=2-s2.0-85137137707&doi=10.1128%2fspectrum.00049-22&partnerID=40&md5=e126a4eb61197238540c0700a709e646	16S RNA; environmental microbiology; geomicrobiology; hydraulic fracturing; hydrocarbons; metagenomics; Permian Basin	English	Article	Final	All Open Access, Green	Scopus	2-s2.0-85137137707
Vodrážková S., Kumpan T., Vodrážka R., Frýda J., Čopjaková R., Koubová M., Munnecke A., Kalvoda J., Holá M.	54397682300;55802022600;14017091900;57220772598;8405411700;6506998707;6701641642;7004459447;8630195300;	Ferruginous coated grains of microbial origin from the Lower Devonian (Pragian) of the Prague Basin (Czech Republic) – Petrological and geochemical perspective	2022	Sedimentary Geology		10.1016/j.sedgeo.2022.106194	https://www.scopus.com/inward/record.uri?eid=2-s2.0-85133831284&doi=10.1016%2fj.sedgeo.2022.106194&partnerID=40&md5=72bd7aa01f3f4da51b2b6ec5960baaac	Ironstones; Microbialites; Oncoids; REE geochemistry; Trace elements geochemistry	English	Article	Final		Scopus	2-s2.0-85133831284
Li D., Van De Werfhorst L.C., Steets B., Ervin J., Murray J.L.S., Smith J., Holden P.A.	56199068600;6505586043;36186173700;55791661500;37561839600;57765658600;7006622240;	Assessing multiple fecal sources to surf zone waters of two recreational beaches by bacterial community analysis	2022	Water Research	1	10.1016/j.watres.2022.118781	https://www.scopus.com/inward/record.uri?eid=2-s2.0-85132945260&doi=10.1016%2fj.watres.2022.118781&partnerID=40&md5=f2d87f84f2f9c7eb6e4d9c3fb9f2ecc5	Bacterial community; Beach water quality; Fecal contamination; Human fecal marker; Microbial source tracking	English	Article	Final	All Open Access, Hybrid Gold	Scopus	2-s2.0-85132945260
Wei Y.-F., Wang L., Xia Z.-Y., Gou M., Sun Z.-Y., Lv W.-F., Tang Y.-Q.	57761009100;57196333712;57189053629;56850114700;57760892100;37117358500;8956229300;	Microbial communities in crude oil phase and filter-graded aqueous phase from a Daqing oilfield after polymer flooding	2022	Journal of Applied Microbiology		10.1111/jam.15603	https://www.scopus.com/inward/record.uri?eid=2-s2.0-85132599166&doi=10.1111%2fjam.15603&partnerID=40&md5=46851473809da0a032d21da9f39198a5	16S rRNA gene sequencing; IMEOR; oil reservoir; polymer flooding; ultra-small bacteria	English	Article	Final		Scopus	2-s2.0-85132599166
Stechele B., van der Zande D., Alvera-Azcárate A., Delbare D., Lacroix G., Nevejan N.	57216982817;56110002700;13007677000;15821890000;7006788239;6507421102;	Biological site suitability for exposed self-regulating cultivation of blue mussel (Mytilus edulis): A Belgian case study	2022	Aquacultural Engineering	2	10.1016/j.aquaeng.2022.102264	https://www.scopus.com/inward/record.uri?eid=2-s2.0-85130822283&doi=10.1016%2fj.aquaeng.2022.102264&partnerID=40&md5=4ae7aef44b591c8be139d26090dacb56	Dynamic Energy Budget; Larval dispersal; Mytilus edulis; Offshore blue mussel; Remote sensing; Self-regulated cultivation	English	Article	Final		Scopus	2-s2.0-85130822283
Sun S., Xiao N., Sha Z.	57848779200;56681781800;14057020900;	Complete mitochondrial genomes of four deep-sea echinoids: conserved mitogenome organization and new insights into the phylogeny and evolution of Echinoidea	2022	PeerJ		10.7717/peerj.13730	https://www.scopus.com/inward/record.uri?eid=2-s2.0-85136114655&doi=10.7717%2fpeerj.13730&partnerID=40&md5=10def470d5d3b6fd9cc0ae7ccffee782	Deep-sea; Echinoidea; Evolution; Mitochondrial genome; Phylogenetic relationship	English	Article	Final	All Open Access, Gold, Green	Scopus	2-s2.0-85136114655
Su Z., Yang S., Li M., Chen Y., Wang S., Yun Y., Li G., Ma T.	57387267100;57387267200;57213423336;57210909133;48661509600;57749643300;55711209100;55728800200;	Complete Genome Sequences of One Salt-Tolerant and Petroleum Hydrocarbon-Emulsifying Terribacillus saccharophilus Strain ZY-1	2022	Frontiers in Microbiology		10.3389/fmicb.2022.932269	https://www.scopus.com/inward/record.uri?eid=2-s2.0-85135812721&doi=10.3389%2ffmicb.2022.932269&partnerID=40&md5=6710a40442116f7b8d89e6d61b0e9073	comparative genomics; complete genome; salt-tolerant; strain ZY-1; Terribacillus saccharophilus	English	Article	Final	All Open Access, Gold, Green	Scopus	2-s2.0-85135812721
Wu C., Tang J., Limlingan Malit J.J., Wang R., Sung H.H.-Y., Williams I.D., Qian P.-Y.	57214937496;57219552609;57812518400;57205332479;57818408900;7201818926;35240648600;	Bathiapeptides: Polythiazole-Containing Peptides from a Marine Biofilm-Derived Bacillus sp.	2022	Journal of Natural Products		10.1021/acs.jnatprod.2c00290	https://www.scopus.com/inward/record.uri?eid=2-s2.0-85134855319&doi=10.1021%2facs.jnatprod.2c00290&partnerID=40&md5=dc7db4a5359e3f7fcfe7770c73f2ec75		English	Article	Final		Scopus	2-s2.0-85134855319
Alam M., Bano N., Ahmad T., Sharangi A.B., Upadhyay T.K., Alraey Y., Alabdallah N.M., Rauf M.A., Saeed M.	57213805376;57779251900;57356963900;15758076900;57193549427;57208601176;57218564046;57190130290;56943568800;	Synergistic Role of Plant Extracts and Essential Oils against Multidrug Resistance and Gram-Negative Bacterial Strains Producing Extended-Spectrum β-Lactamases	2022	Antibiotics	1	10.3390/antibiotics11070855	https://www.scopus.com/inward/record.uri?eid=2-s2.0-85133354294&doi=10.3390%2fantibiotics11070855&partnerID=40&md5=e42fd55a3c86e249081cb9e7292e7a88	antimicrobial resistance; antioxidant; extended-spectrum β-lactamases; pathogenic microbes; plant extract and essential oil; synergistic effect	English	Review	Final	All Open Access, Gold, Green	Scopus	2-s2.0-85133354294
Lauricella M., Maggio A., Badalamenti N., Bruno M., D'Angelo G.D., D'Anneo A.	7003672299;7007089128;57215577834;57982255300;57722982100;57555430900;	Essential oil of Foeniculum vulgare subsp. piperitum fruits exerts an anti‑tumor effect in triple‑negative breast cancer cells	2022	Molecular medicine reports	4	10.3892/mmr.2022.12759	https://www.scopus.com/inward/record.uri?eid=2-s2.0-85131177867&doi=10.3892%2fmmr.2022.12759&partnerID=40&md5=87a0ddca8ef6a7af412a14005d47aa82	antitumor effect; apoptotic cell death; breast cancer; essential oil; phytochemicals	English	Article	Final		Scopus	2-s2.0-85131177867
Liu Y.-F., Yang L., Liu Z.-L., Chen J., Fang B., Zhou L., Liu J.-F., Yang S.-Z., Gu J.-D., Mu B.-Z.	57285027300;57396684600;57218528408;57208251789;57718803700;55710625100;36096880500;8719114200;7403129601;55509556000;	Discovery of the non-cosmopolitan lineages in Candidatus Thermoprofundales	2022	Environmental Microbiology	1	10.1111/1462-2920.15965	https://www.scopus.com/inward/record.uri?eid=2-s2.0-85131007995&doi=10.1111%2f1462-2920.15965&partnerID=40&md5=be0ad20d0bdaea142357703b778e2ff9		English	Article	Final		Scopus	2-s2.0-85131007995
Holz O., van Vorstenbosch R., Guenther F., Schuchardt S., Trinkmann F., van Schooten F.-J., Smolinska A., Hohlfeld J.M.	7004039457;57218163999;57675372900;23092162000;23977076400;7006507494;37027100700;7006477184;	Changes of breath volatile organic compounds in healthy volunteers following segmental and inhalation endotoxin challenge	2022	Journal of Breath Research		10.1088/1752-7163/ac6359	https://www.scopus.com/inward/record.uri?eid=2-s2.0-85129780605&doi=10.1088%2f1752-7163%2fac6359&partnerID=40&md5=cf43a1388d0175d47638c42a46c3d549	airway inflammation; aldehydes; breath analysis; non-invasive monitoring; oxidative stress	English	Article	Final		Scopus	2-s2.0-85129780605
Qi P., Sun D., Zhang G., Li D., Wu T., Li Y.	57188826090;57208122409;57416182200;57669040600;57188696748;24438381700;	Bio-augmentation with dissimilatory nitrate reduction to ammonium (DNRA) driven sulfide-oxidizing bacteria enhances the durability of nitrate-mediated souring control	2022	Water Research	3	10.1016/j.watres.2022.118556	https://www.scopus.com/inward/record.uri?eid=2-s2.0-85129554245&doi=10.1016%2fj.watres.2022.118556&partnerID=40&md5=cc25ff80fd96ee4226a98da938f581e3	Bio-augmentation; Bio-demulsification; Denitrification; DNRA; Souring control	English	Article	Final		Scopus	2-s2.0-85129554245
Lin D.-D., Liu Y.-F., Zhou L., Yang S.-Z., Gu J.-D., Mu B.-Z.	57218529862;57285027300;55710625100;8719114200;7403129601;55509556000;	Stimulation of Bathyarchaeota in enrichment cultures by syringaldehyde, 4-hydroxybenzaldehyde and vanillin under anaerobic conditions	2022	International Biodeterioration and Biodegradation		10.1016/j.ibiod.2022.105409	https://www.scopus.com/inward/record.uri?eid=2-s2.0-85127770684&doi=10.1016%2fj.ibiod.2022.105409&partnerID=40&md5=29eeda2f547f96a7fe4c25395875bb3d	Aldehyde compound; Bathyarchaeota; Biodegradation; Soil sediment	English	Article	Final		Scopus	2-s2.0-85127770684
Pattis I., Weaver L., Burgess S., Ussher J.E., Dyet K.	57195221137;23398959600;32867576200;35199301700;55928138900;	Antimicrobial Resistance in New Zealand—A One Health Perspective	2022	Antibiotics		10.3390/antibiotics11060778	https://www.scopus.com/inward/record.uri?eid=2-s2.0-85132162888&doi=10.3390%2fantibiotics11060778&partnerID=40&md5=7a341be52b19b8efd55d8a276abc490a	AMR; antimicrobial; environmental AMR; impacts; New Zealand; One Health; resistance	English	Review	Final	All Open Access, Gold, Green	Scopus	2-s2.0-85132162888
Kim H.-J., Youn H.-Y., Kang H.-J., Moon J.-S., Jang Y.-S., Song K.-Y., Seo K.-H.	57418631300;57417674700;57208791752;7403231051;57218294764;37027306400;55480614100;	Prevalence and Virulence Characteristics of Enterococcus faecalis and Enterococcus faecium in Bovine Mastitis Milk Compared to Bovine Normal Raw Milk in South Korea	2022	Animals	3	10.3390/ani12111407	https://www.scopus.com/inward/record.uri?eid=2-s2.0-85131689061&doi=10.3390%2fani12111407&partnerID=40&md5=32a7ea280e6511461e24751ccba1784d	antimicrobial resistance; bovine mastitis milk; bovine normal raw milk; Enterococcus spp.; virulence factors	English	Article	Final	All Open Access, Gold, Green	Scopus	2-s2.0-85131689061
Schwab L., Popp D., Nowack G., Bombach P., Vogt C., Richnow H.H.	57210147067;56967832300;57699668100;14043190000;7102423319;7003652661;	Structural analysis of microbiomes from salt caverns used for underground gas storage	2022	International Journal of Hydrogen Energy	1	10.1016/j.ijhydene.2022.04.170	https://www.scopus.com/inward/record.uri?eid=2-s2.0-85130382117&doi=10.1016%2fj.ijhydene.2022.04.170&partnerID=40&md5=ed80c569402377fc8046e8e36b3072ea	Halophiles; Hydrogen; Microbial diversity; Salt cavern; Sulfate reduction; Underground gas storage	English	Article	Final		Scopus	2-s2.0-85130382117
Orlandi V.T., Martegani E., Giaroni C., Baj A., Bolognese F.	8060938500;57200308364;56431031700;55982137100;6603084947;	Bacterial pigments: A colorful palette reservoir for biotechnological applications	2022	Biotechnology and Applied Biochemistry	3	10.1002/bab.2170	https://www.scopus.com/inward/record.uri?eid=2-s2.0-85104972332&doi=10.1002%2fbab.2170&partnerID=40&md5=9f95a879aec8fc9b58bb583600a2e8f6	bioactive compound; biotechnology; E. coli; enzyme; expression systems; gene expression; melanin; microbial metabolism; pigments	English	Review	Final	All Open Access, Hybrid Gold, Green	Scopus	2-s2.0-85104972332
Wu X., Liu Z., Li M., Bartlam M., Wang Y.	57210567195;55823353000;57199160246;6701775559;55734108800;	Integrated metagenomic and metatranscriptomic analysis reveals actively expressed antibiotic resistomes in the plastisphere	2022	Journal of Hazardous Materials	6	10.1016/j.jhazmat.2022.128418	https://www.scopus.com/inward/record.uri?eid=2-s2.0-85124322173&doi=10.1016%2fj.jhazmat.2022.128418&partnerID=40&md5=8211e8d4d31e0c41de715b390198b264	Antibiotic resistance genes (ARGs); Antibiotic resistome; Haihe River; Microplastic; Plastisphere	English	Article	Final		Scopus	2-s2.0-85124322173
Yun Y., Gui Z., Su T., Tian X., Wang S., Chen Y., Su Z., Fan H., Xie J., Li G., Xia W., Ma T.	56956317600;57224173289;57436302200;57195411851;48661509600;57210909133;57387267100;57215419651;57109613800;55711209100;36660199100;55728800200;	Deep mining decreases the microbial taxonomic and functional diversity of subsurface oil reservoirs	2022	Science of the Total Environment	3	10.1016/j.scitotenv.2022.153564	https://www.scopus.com/inward/record.uri?eid=2-s2.0-85123888347&doi=10.1016%2fj.scitotenv.2022.153564&partnerID=40&md5=f145a8f8476e64a0b7c30c583f5cb604	Co-occurrence pattern; Community assembly; Deep biosphere; Environmental change; Oil production; Oil reservoir	English	Article	Final		Scopus	2-s2.0-85123888347
de Lima V.M., Batista B.B., da Silva Neto J.F.	57216402388;57206693176;6603897432;	The Regulatory Protein ChuP Connects Heme and Siderophore-Mediated Iron Acquisition Systems Required for Chromobacterium violaceum Virulence	2022	Frontiers in Cellular and Infection Microbiology		10.3389/fcimb.2022.873536	https://www.scopus.com/inward/record.uri?eid=2-s2.0-85130998378&doi=10.3389%2ffcimb.2022.873536&partnerID=40&md5=b8089eef662b419dab888bd79779c123	bacterial physiology; bacterial virulence; Chromobacterium violaceum; heme transporter; heme uptake; iron homeostasis; siderophores	English	Article	Final	All Open Access, Gold, Green	Scopus	2-s2.0-85130998378
Schultz J., Argentino I.C.V., Kallies R., Nunes da Rocha U., Rosado A.S.	57149885000;57200079660;16432563700;24781191100;7102720385;	Polyphasic Analysis Reveals Potential Petroleum Hydrocarbon Degradation and Biosurfactant Production by Rare Biosphere Thermophilic Bacteria From Deception Island, an Active Antarctic Volcano	2022	Frontiers in Microbiology	2	10.3389/fmicb.2022.885557	https://www.scopus.com/inward/record.uri?eid=2-s2.0-85130555855&doi=10.3389%2ffmicb.2022.885557&partnerID=40&md5=8f65d3171e7ca8d9323b99da67f3d03a	Antarctica; bacterial isolation; biosurfactants; extremophiles; oil degradation; polar volcano; thermophiles	English	Article	Final	All Open Access, Gold, Green	Scopus	2-s2.0-85130555855
Mahmoud S.F., Fayez M., Swelum A.A., Alswat A.S., Alkafafy M., Alzahrani O.M., Alsunaini S.J., Almuslem A., Amer A.S.A., Yusuf S.	55681698200;57201602518;57192975672;57546406200;35091029800;56231199200;57381663400;57546796100;57709735700;57547558600;	Genetic Diversity, Biofilm Formation, and Antibiotic Resistance of Pseudomonas aeruginosa Isolated from Cow, Camel, and Mare with Clinical Endometritis	2022	Veterinary Sciences		10.3390/vetsci9050239	https://www.scopus.com/inward/record.uri?eid=2-s2.0-85130750759&doi=10.3390%2fvetsci9050239&partnerID=40&md5=25f1b1bd75dd1bb4da1c47e3d9977bce	antimicrobial resistance; antimicrobial-resistance genes; carbapenem resistance; MLST; multidrug resistance; Pseudomonas aeruginosa; virulence genes	English	Article	Final	All Open Access, Gold, Green	Scopus	2-s2.0-85130750759
Wang S., Sen K., He Y., Bai M., Wang G.	57409330800;57209006972;57195262559;57225707710;55738702500;	Riverine Inputs Impact the Diversity and Population Structure of Heterotrophic Fungus-like Protists and Bacterioplankton in the Coastal Waters of the South China Sea	2022	Water (Switzerland)		10.3390/w14101580	https://www.scopus.com/inward/record.uri?eid=2-s2.0-85130642221&doi=10.3390%2fw14101580&partnerID=40&md5=dff280765493c14819458fae87013447	diversity; DNA sequencing; salinity gradient; thraustochytrids	English	Article	Final	All Open Access, Gold	Scopus	2-s2.0-85130642221
Semenzato G., Alonso-Vásquez T., Duca S.D., Vassallo A., Riccardi C., Zaccaroni M., Mucci N., Padula A., Emiliani G., Piccionello A.P., Puglia A.M., Fani R.	57640387700;57639377000;57216898848;57217415406;57226306110;22942682700;55925708600;57324487400;24172960900;8356986600;6701322267;7003704509;	Genomic Analysis of Endophytic Bacillus-Related Strains Isolated from the Medicinal Plant Origanum vulgare L. Revealed the Presence of Metabolic Pathways Involved in the Biosynthesis of Bioactive Compounds	2022	Microorganisms	2	10.3390/microorganisms10050919	https://www.scopus.com/inward/record.uri?eid=2-s2.0-85128862562&doi=10.3390%2fmicroorganisms10050919&partnerID=40&md5=7663f787b1e0da32bc66fd8ea63e53e4	antimicrobial resistance; bacterial endophytes; essential oil; microbiome; plant growth-promoting bacteria	English	Article	Final	All Open Access, Gold, Green	Scopus	2-s2.0-85128862562
Xiang W., Liang Y., Hong S., Wang G., You J., Xue Y., Ma Y.	57574505400;57574763700;57203936468;57218079323;57196002762;7402270781;7404700526;	Degradation of long-chain n-alkanes by a novel thermal-tolerant Rhodococcus strain	2022	Archives of Microbiology	2	10.1007/s00203-022-02872-3	https://www.scopus.com/inward/record.uri?eid=2-s2.0-85128159652&doi=10.1007%2fs00203-022-02872-3&partnerID=40&md5=c2575da42ab3ec20bfb78aecca63c38c	alkB gene; Hydrocarbon degradation; Long-chain n-alkane; Rhodococcus	English	Article	Final		Scopus	2-s2.0-85128159652
Gendron A., Allen K.D.	57669119200;54390792800;	Overview of Diverse Methyl/Alkyl-Coenzyme M Reductases and Considerations for Their Potential Heterologous Expression	2022	Frontiers in Microbiology	3	10.3389/fmicb.2022.867342	https://www.scopus.com/inward/record.uri?eid=2-s2.0-85129507329&doi=10.3389%2ffmicb.2022.867342&partnerID=40&md5=01341679c78bd050a00e5c62742299f9	anaerobic methanotrophic archaea; ANME; MCR; methanogens; methyl-coenzyme M reductase	English	Review	Final	All Open Access, Gold, Green	Scopus	2-s2.0-85129507329
Zhang P., Zhu Y., Li Z., Zhang W., Mu W.	57244381400;57190424589;57243830800;55207304700;20433897700;	Recent Advances on Lacto- N-neotetraose, a Commercially Added Human Milk Oligosaccharide in Infant Formula	2022	Journal of Agricultural and Food Chemistry	2	10.1021/acs.jafc.2c01101	https://www.scopus.com/inward/record.uri?eid=2-s2.0-85128394029&doi=10.1021%2facs.jafc.2c01101&partnerID=40&md5=79448d363414c9944583789fbf035ac7	biosynthesis; human milk oligosaccharides; infant formula; lacto- N-neotetraose; physiological effects	English	Review	Final		Scopus	2-s2.0-85128394029
Yin X., Wang W., Wang A., He M., Lin C., Ouyang W., Liu X.	57220154062;57218355097;57195547114;7402608940;8703465200;8945084300;24399193700;	Microbial community structure and metabolic potential in the coastal sediments around the Yellow River Estuary	2022	Science of the Total Environment	2	10.1016/j.scitotenv.2021.151582	https://www.scopus.com/inward/record.uri?eid=2-s2.0-85119272593&doi=10.1016%2fj.scitotenv.2021.151582&partnerID=40&md5=3098c246b9d4ddcde4436d08c5923ea1	Amplicon sequencing; GeoChip technology; Microbial community; Sediments; Yellow River Estuary	English	Article	Final		Scopus	2-s2.0-85119272593
Cui Z., Luan X., Li S., Li Y., Bian X., Li G., Wei Q., Ran X., Bao M., Valentine D.L.	26435103800;56905215800;57220053295;57226341177;57394418600;57394223400;36538367600;24479090000;8257443900;34972181800;	Occurrence and distribution of cyclic-alkane-consuming psychrophilic bacteria in the Yellow Sea and East China Sea	2022	Journal of Hazardous Materials		10.1016/j.jhazmat.2021.128129	https://www.scopus.com/inward/record.uri?eid=2-s2.0-85122133519&doi=10.1016%2fj.jhazmat.2021.128129&partnerID=40&md5=cbdfec589df2a06d49edde0f79096c20	Condensate; Cycloalkanes; Methylcyclohexane; Oligotrophic marine gammaproteobacteria; Yellow Sea Cold Water Mass	English	Article	Final	All Open Access, Hybrid Gold	Scopus	2-s2.0-85122133519
Andrés-Lasheras S., Jelinski M., Zaheer R., McAllister T.A.	57192643300;7003410470;57028058900;7102068695;	Bovine Respiratory Disease: Conventional to Culture-Independent Approaches to Studying Antimicrobial Resistance in North America	2022	Antibiotics	2	10.3390/antibiotics11040487	https://www.scopus.com/inward/record.uri?eid=2-s2.0-85128469614&doi=10.3390%2fantibiotics11040487&partnerID=40&md5=c921e3a054a9a2c84e2a2abea46e7a7b	antimicrobial resistance; bovine respiratory disease; diagnostics; Histophilus somni; integrative and conjugative elements; Mannheimia haemolytica; microbiome; Mycoplasma bovis; Pasteurella multocida	English	Review	Final	All Open Access, Gold, Green	Scopus	2-s2.0-85128469614
Ou M.-Y., Zhang H., Tan P.-C., Zhou S.-B., Li Q.-F.	57560190500;57207483307;57203975629;54996829400;55576693200;	Adipose tissue aging: mechanisms and therapeutic implications	2022	Cell Death and Disease	7	10.1038/s41419-022-04752-6	https://www.scopus.com/inward/record.uri?eid=2-s2.0-85127536128&doi=10.1038%2fs41419-022-04752-6&partnerID=40&md5=3b63d63376122e58a090c189d16aaeb2		English	Review	Final	All Open Access, Gold, Green	Scopus	2-s2.0-85127536128
Zavarzina D.G., Prokofeva M.I., Pikhtereva V.A., Klyukina A.A., Maslov A.A., Merkel A.Y., Gavrilov S.N.	55396821300;6508272553;57558943800;57282449600;57225681204;55216485500;7102677216;	Deferrivibrio essentukiensis sp. nov., gen. nov., a Representative of Deferrivibrionaceae fam. nov., Isolated from the Subsurface Aquifer of Caucasian Mineral Drinking Waters	2022	Microbiology (Russian Federation)	2	10.1134/S0026261722020114	https://www.scopus.com/inward/record.uri?eid=2-s2.0-85127428755&doi=10.1134%2fS0026261722020114&partnerID=40&md5=81450c11ff5e4dec72feba4e71087bbc	Deferribacterales; iron reduction; mineral water aquifers; subsurface biosphere; thermophiles	English	Article	Final	All Open Access, Hybrid Gold	Scopus	2-s2.0-85127428755
Kotzamanidis C., Malousi A., Dushku E., Dobly A., De Keersmaecker S.C.J., Roosens N.H., Karathodorou A., Staikou A., Zdragas A., Yiangou M.	6701430708;22433723600;57209718989;6506013670;8564781800;6603148446;57556234500;7801336250;6508061218;6601947508;	Listeria monocytogenes isolates from Cornu aspersum snails: Whole genome-based characterization and host-pathogen interactions in a snail infection model	2022	Fish and Shellfish Immunology		10.1016/j.fsi.2022.03.028	https://www.scopus.com/inward/record.uri?eid=2-s2.0-85127341716&doi=10.1016%2fj.fsi.2022.03.028&partnerID=40&md5=fac91b066baed969ba88acd1bbd0c356	Apoptosis; Host-pathogen interactions; Hypervirulent strains; Listeria monocytogenes; mogR; snails; Whole genome analysis	English	Article	Final		Scopus	2-s2.0-85127341716
Nevers M.B., Buszka P.M., Byappanahalli M.N., Cole T., Corsi S.R., Ryan Jackson P., Kinzelman J.L., Nakatsu C.H., Phanikumar M.S.	6602883991;7801584802;6602901110;57474798200;7004634396;57205538238;6506127160;7004257294;6603564308;	Microbial source tracking and evaluation of best management practices for restoring degraded beaches of Lake Michigan	2022	Journal of Great Lakes Research		10.1016/j.jglr.2022.01.009	https://www.scopus.com/inward/record.uri?eid=2-s2.0-85125624353&doi=10.1016%2fj.jglr.2022.01.009&partnerID=40&md5=5e745e91cf9d10290cfd08ccc0ff48ec	Hydrodynamics; Laurentian Great Lakes; Microbial communities; Microbial source tracking; Molecular markers	English	Review	Final		Scopus	2-s2.0-85125624353
Zhang J., Feng W., Xue Q.	56518589500;57454804800;7201986356;	Biosurfactant production and oil degradation by Bacillus siamensis and its potential applications in enhanced heavy oil recovery	2022	International Biodeterioration and Biodegradation	3	10.1016/j.ibiod.2022.105388	https://www.scopus.com/inward/record.uri?eid=2-s2.0-85124701772&doi=10.1016%2fj.ibiod.2022.105388&partnerID=40&md5=f8459634d6bd21ff4b844cb912298306	Bacillus siamensis; Biodegradation; Biosurfactants; Heavy oil exploitation; Microbial enhanced oil recovery	English	Article	Final		Scopus	2-s2.0-85124701772
Unsal T., Wang D., Kijkla P., Kumseranee S., Punpruk S., Mohamed M.E., Saleh M.A., Gu T.	56178265500;57205888437;57220777106;57201378509;26325734800;7201586226;24398647200;7102898905;	Food-grade D-limonene enhanced a green biocide in the mitigation of carbon steel biocorrosion by a mixed-culture biofilm consortium	2022	Bioprocess and Biosystems Engineering	2	10.1007/s00449-021-02685-6	https://www.scopus.com/inward/record.uri?eid=2-s2.0-85122648970&doi=10.1007%2fs00449-021-02685-6&partnerID=40&md5=00057e8b462e909faa87551c3936dbce	Biocide; Biofilm; D-Limonene; Green chemical; Microbiologically influenced corrosion	English	Article	Final		Scopus	2-s2.0-85122648970
Šimečková P., Pěnčíková K., Kováč O., Slavík J., Pařenicová M., Vondráček J., Machala M.	24478925800;13006365200;57204493422;42962663200;57227491700;7007139345;7005791265;	In vitro profiling of toxic effects of environmental polycyclic aromatic hydrocarbons on nuclear receptor signaling, disruption of endogenous metabolism and induction of cellular stress	2022	Science of the Total Environment	9	10.1016/j.scitotenv.2021.151967	https://www.scopus.com/inward/record.uri?eid=2-s2.0-85120787323&doi=10.1016%2fj.scitotenv.2021.151967&partnerID=40&md5=eb05543a788bdd783cd2c4319ac4b12a	Cellular stress response; Energy metabolism; Nuclear receptors; Polycyclic aromatic hydrocarbons; Sphingolipids	English	Article	Final		Scopus	2-s2.0-85120787323
Zarzecka U., Zadernowska A., Chajęcka-Wierzchowska W.	57205467193;36020797000;56193123500;	Effects of osmotic and high pressure stress on expression of virulence factors among Enterococcus spp. isolated from food of animal origin	2022	Food Microbiology	6	10.1016/j.fm.2021.103900	https://www.scopus.com/inward/record.uri?eid=2-s2.0-85115078971&doi=10.1016%2fj.fm.2021.103900&partnerID=40&md5=ae470726eb922577e17dbebaa761b1fa	Enterococcus spp.; Food; Gene expression; Osmotic stress; Virulence factors; Virulence-related genes	English	Article	Final	All Open Access, Hybrid Gold	Scopus	2-s2.0-85115078971
da Fonsêca M.M.B., Freitas J.F., Silva-Portela R.D.C.B., Minnicelli C.F., da Silva-Barbalho K.K., Agnez-Lima L.F.	57204001433;57220486817;57078975300;36245468900;57372155100;6602865106;	First insights into bacterial communities in pre-salt oil reveal a far-from-sterile environment	2022	Fuel		10.1016/j.fuel.2021.122860	https://www.scopus.com/inward/record.uri?eid=2-s2.0-85121098714&doi=10.1016%2fj.fuel.2021.122860&partnerID=40&md5=c8de36ec82910c64cbb93b8e59573ca1	16S rRNA gene; Microbial diversity; Microbiome; Oil reservoir; Petroleum; Pre-salt oil	English	Article	Final		Scopus	2-s2.0-85121098714
Scheffer G., Rachel N.M., Ng K.K.S., Sen A., Gieg L.M.	57197864653;56971396600;7403178437;8574524000;6601913918;	Preparation and identification of carboxymethyl cellulose-degrading enzyme candidates for oilfield applications	2022	Journal of Biotechnology	2	10.1016/j.jbiotec.2022.02.001	https://www.scopus.com/inward/record.uri?eid=2-s2.0-85125746209&doi=10.1016%2fj.jbiotec.2022.02.001&partnerID=40&md5=251311c8841a537a4dd5039ccbb36abf	Biodegradation; Carboxymethyl cellulose; Cellulase; Filter cake; Hydraulic fracturing; Xylanase	English	Article	Final		Scopus	2-s2.0-85125746209
Boucherabine S., Nassar R., Zaher S., Mohamed L., Olsen M., Alqutami F., Hachim M., Alkhaja A., Campos M., Jones P., McKirdy S., Alghafri R., Tajouri L., Senok A.	57557190400;57210947977;57190740516;57556807100;57216728367;57328714200;55503841000;57219833826;57217335726;14522476000;7004116714;55897448700;7801525005;6507331569;	Metagenomic Sequencing and Reverse Transcriptase PCR Reveal That Mobile Phones and Environmental Surfaces Are Reservoirs of Multidrug-Resistant Superbugs and SARS-CoV-2	2022	Frontiers in Cellular and Infection Microbiology	3	10.3389/fcimb.2022.806077	https://www.scopus.com/inward/record.uri?eid=2-s2.0-85127306665&doi=10.3389%2ffcimb.2022.806077&partnerID=40&md5=f0354e5020bdcd6989a50f554b39a0ba	fomites; mobile phones; Pseudomonas; SARS-CoV-2; shotgun metagenomics; Staphylococcus	English	Article	Final	All Open Access, Gold, Green	Scopus	2-s2.0-85127306665
Su X., Wang L., Zhao W., Xia D., Zhou Y., Wang Q.	7402181848;57563200600;57203835158;36562902900;57425094600;55762120300;	Physical simulation of in-situ microbial methanation in coal reservoirs with the participation of supercritical CO2 [超临界 CO2 参与下煤储层原位微生物甲烷化物理模拟研究]	2022	Meitiandizhi Yu Kantan/Coal Geology and Exploration		10.12363/issn.1001-1986.21.11.0684	https://www.scopus.com/inward/record.uri?eid=2-s2.0-85130488552&doi=10.12363%2fissn.1001-1986.21.11.0684&partnerID=40&md5=ce3bdebfd5f4b57dd6883d782ae27204	anaerobic fermentation; carbon emission reduction; coalbed gas bioengineering; in-situ conditions of coal reservoir; microbial methanation; physical simulation; supercritical carbon dioxide	Chinese	Article	Final		Scopus	2-s2.0-85130488552
Nwobodo D.C., Eze P.M., Okezie U.M., Okafoanyali J.O., Okoye F.B.C., Esimone C.O.	57193210741;57193708087;57211340112;57612235000;23968084100;6701661871;	Bioactive Compounds Characterization and Antimicrobial Potentials of Crude Extract of Curvularia lunata, a Fungal Endophyte from Elaeis guineensis.	2022	Tropical Journal of Natural Product Research	4	10.26538/tjnpr/v6i3.16	https://www.scopus.com/inward/record.uri?eid=2-s2.0-85128741753&doi=10.26538%2ftjnpr%2fv6i3.16&partnerID=40&md5=7c525b85a6b93e99c936b00eb7851d88	Antimicrobial activity; Bioactive metabolites; Curvularia lunata; Elaeis guineensis; GC-MS analysis	English	Article	Final		Scopus	2-s2.0-85128741753
Alzahrani O.M., Fayez M., Alswat A.S., Alkafafy M., Mahmoud S.F., Al-Marri T., Almuslem A., Ashfaq H., Yusuf S.	56231199200;57201602518;57546406200;35091029800;55681698200;57213594780;57546796100;57845389700;57547558600;	Antimicrobial Resistance, Biofilm Formation, and Virulence Genes in Enterococcus Species from Small Backyard Chicken Flocks	2022	Antibiotics	3	10.3390/antibiotics11030380	https://www.scopus.com/inward/record.uri?eid=2-s2.0-85126975842&doi=10.3390%2fantibiotics11030380&partnerID=40&md5=218f3b8d026f27b99cc02d9334326395	antimicrobial resistance; antimicrobial-resistance genes; backyard chickens; Enterococcus; multidrug resistance; virulence genes	English	Article	Final	All Open Access, Gold, Green	Scopus	2-s2.0-85126975842
Hu H., Clothier N., Jacombs A., McKay K., Deva A.K., Vickery K.	55674776100;57545827300;6508212299;35584906000;6603905890;56283850500;	Biofilm on Toothbrushes of Children with Cystic Fibrosis: A Potential Source of Lung Re-Infection after Antibiotic Treatment?	2022	Materials		10.3390/ma15062139	https://www.scopus.com/inward/record.uri?eid=2-s2.0-85126972660&doi=10.3390%2fma15062139&partnerID=40&md5=d444f6e6b313bd39604467ff7c4485b5	Antibiotic treatment; Biofilm; Cystic fibrosis; Recurrent lung infection; Toothbrush	English	Article	Final	All Open Access, Gold, Green	Scopus	2-s2.0-85126972660
Gambino D., Savoca D., Sucato A., Gargano V., Gentile A., Pantano L., Vicari D., Alduina R.	57215675690;57198522217;57215653159;54079519300;57193747299;37004634800;23486899100;7801600940;	Occurrence of Antibiotic Resistance in the Mediterranean Sea	2022	Antibiotics		10.3390/antibiotics11030332	https://www.scopus.com/inward/record.uri?eid=2-s2.0-85126529270&doi=10.3390%2fantibiotics11030332&partnerID=40&md5=1a55bcc0b615e0cf7f7b8f87dc1b1cf0	Antibiotic resistance genes; Antibiotic-resistant bacteria; BlaTEM; Heavy metal resistance genes; Int1; SulII	English	Article	Final	All Open Access, Gold, Green	Scopus	2-s2.0-85126529270
Cascarina S.M., Ross E.D.	55980589700;7202436864;	Phase separation by the SARS-CoV-2 nucleocapsid protein: Consensus and open questions	2022	Journal of Biological Chemistry	6	10.1016/j.jbc.2022.101677	https://www.scopus.com/inward/record.uri?eid=2-s2.0-85125728116&doi=10.1016%2fj.jbc.2022.101677&partnerID=40&md5=8cb44a85c95b0cff827228e1c137e7f6		English	Review	Final	All Open Access, Gold, Green	Scopus	2-s2.0-85125728116
Serville-Tertullien M., Charlemagne K., Eristhee N., McDermott K., Majury A., Schirmer T., Sultana T., Metcalfe C.D.	57471979300;57471799000;6504158522;57208595429;6507266116;57471921900;25636348600;7005470541;	Sources of microbial contamination in the watershed and coastal zone of Soufriere, St. Lucia	2022	Environmental Monitoring and Assessment		10.1007/s10661-022-09862-4	https://www.scopus.com/inward/record.uri?eid=2-s2.0-85125524596&doi=10.1007%2fs10661-022-09862-4&partnerID=40&md5=452cee4eafaa6a7f7208ea56384aac95	Bacteroidales; Caffeine; E. coli; Sucralose; Total coliforms; Wastewater	English	Article	Final	All Open Access, Bronze, Green	Scopus	2-s2.0-85125524596
Xu G., Zhang N., Zhao X., Chen C., Zhang C., He J.	57201476258;57193064058;57222611941;56112525600;55703967300;55671919600;	Offshore Marine Sediment Microbiota Respire Structurally Distinct Organohalide Pollutants	2022	Environmental Science and Technology	8	10.1021/acs.est.1c06680	https://www.scopus.com/inward/record.uri?eid=2-s2.0-85125266276&doi=10.1021%2facs.est.1c06680&partnerID=40&md5=165835b023b0bdca8a2c4942896ea01a	marine sediments; microbial reductive dehalogenation; organohalide-respiring bacteria; organohalides; reductive dehalogenase	English	Article	Final		Scopus	2-s2.0-85125266276
Kim S.H., Kim J.H., Lee S.J., Jung M.S., Jeong D.H., Lee K.H.	57196226374;57223088673;57409169500;57408311700;7102257209;57215720940;	Minimally invasive skin sampling and transcriptome analysis using microneedles for skin type biomarker research	2022	Skin Research and Technology	1	10.1111/srt.13135	https://www.scopus.com/inward/record.uri?eid=2-s2.0-85122709533&doi=10.1111%2fsrt.13135&partnerID=40&md5=143ea5c2e0f9d2cca7b7e8d9f9fe4c7f	biomarker; microneedle; RNA; skin sampling; skin type; transcriptomics	English	Article	Final	All Open Access, Hybrid Gold	Scopus	2-s2.0-85122709533
Paul S., Datta B.K., Ratnaparkhe M.B., Dholakia B.B.	57290396000;24343651000;6506640153;6508136079;	Turning Waste into Beneficial Resource: Implication of Ageratum conyzoides L. in Sustainable Agriculture, Environment and Biopharma Sectors	2022	Molecular Biotechnology	3	10.1007/s12033-021-00409-5	https://www.scopus.com/inward/record.uri?eid=2-s2.0-85116809480&doi=10.1007%2fs12033-021-00409-5&partnerID=40&md5=6a113df81de79c128845f7f6f4e6e6e4	Ageratum conyzoides; Agri-biotechnology; Biopharma; Clean environment; Crop protection; Genome editing; Multi-omics; NGS; RNAi; Secondary metabolites	English	Review	Final	All Open Access, Bronze, Green	Scopus	2-s2.0-85116809480
Zare M., Zendehboudi S., Abdi M.A.	57213939011;37014087800;57194438498;	Deterministic tools to estimate induction time for methane hydrate formation in the presence of Luvicap 55 W solutions	2022	Journal of Molecular Liquids	2	10.1016/j.molliq.2021.118374	https://www.scopus.com/inward/record.uri?eid=2-s2.0-85122583494&doi=10.1016%2fj.molliq.2021.118374&partnerID=40&md5=d6e3d208bf9cf62fbc6c8bc09954f797	Gas hydrates; Induction time; Luvicap 55W; Smart tools; Statistical analysis	English	Article	Final		Scopus	2-s2.0-85122583494
Pérez-Umphrey A.A., Jonsson C.B., Bonisoli-Alquati A., Snider A.M., Stouffer P.C., Taylor S.S.	56079282900;7102791844;23567867200;57226062310;6701351109;8646012800;	Sex and habitat drive hantavirus prevalence in marsh rice rat populations impacted by the Deepwater Horizon oil spill	2022	Ecosphere		10.1002/ecs2.3929	https://www.scopus.com/inward/record.uri?eid=2-s2.0-85125133588&doi=10.1002%2fecs2.3929&partnerID=40&md5=89c63e8a6a07f81e9ccf69cc538508e6	Bayou virus; coastal saltmarsh; Deepwater Horizon oil spill; demographics; hantavirus; Louisiana; marsh rice rat; prevalence	English	Article	Final		Scopus	2-s2.0-85125133588
Naeem M., Khalil A.B., Tariq Z., Mahmoud M.	57219415031;56027813400;56636800800;35792348900;	A Review of Advanced Molecular Engineering Approaches to Enhance the Thermostability of Enzyme Breakers: From Prospective of Upstream Oil and Gas Industry	2022	International Journal of Molecular Sciences	1	10.3390/ijms23031597	https://www.scopus.com/inward/record.uri?eid=2-s2.0-85123609923&doi=10.3390%2fijms23031597&partnerID=40&md5=77b02707016f356b9e92c65a294a5dd0	Direct evolution; Enzyme breakers; Enzyme engineering; Rational design; Thermostability	English	Review	Final	All Open Access, Gold, Green	Scopus	2-s2.0-85123609923
Carvalho P.H.A., Al-Maawi S., Dohle E., Sader R.A., Pereira-Filho V.A., Ghanaati S.	57245538900;57193677158;24070468700;7003666504;6507368717;26658310300;	Cellular Response of Human Osteoblasts to Different Presentations of Deproteinized Bovine Bone	2022	Materials	1	10.3390/ma15030999	https://www.scopus.com/inward/record.uri?eid=2-s2.0-85123456950&doi=10.3390%2fma15030999&partnerID=40&md5=c44ba98834caecd1096cee94b83697a1	Cellular inflammatory response; Deproteinized bovine bone matrix (DBBM); Guided bone regeneration; Purification	English	Article	Final	All Open Access, Gold, Green	Scopus	2-s2.0-85123456950
Gao Y., Yuan L., Du J., Wang H., Yang X., Duan L., Zheng L., Bahar M.M., Zhao Q., Zhang W., Liu Y., Fu Z., Wang W., Naidu R.	55881692600;57366123100;27067521900;57218524524;57881815700;55922288300;57201461210;55332983400;55544876100;56146226000;56202307600;57218645492;57784676800;7102091779;	Bacterial community profile of the crude oil-contaminated saline soil in the Yellow River Delta Natural Reserve, China	2022	Chemosphere	7	10.1016/j.chemosphere.2021.133207	https://www.scopus.com/inward/record.uri?eid=2-s2.0-85120793233&doi=10.1016%2fj.chemosphere.2021.133207&partnerID=40&md5=5a542f7c347f6774d23d7872eb3c10fe	16S rRNA; Bacterial community; Crude oil contamination; Hydrocarbon degradation; Saline soil	English	Article	Final		Scopus	2-s2.0-85120793233
Avona A., Capodici M., Di Trapani D., Giustra M.G., Greco Lucchina P., Lumia L., Di Bella G., Viviani G.	57200788426;36616832500;55627877897;56830493900;57283269200;57215574715;16401218500;16403583100;	Preliminary insights about the treatment of contaminated marine sediments by means of bioslurry reactor: Process evaluation and microbiological characterization	2022	Science of the Total Environment	4	10.1016/j.scitotenv.2021.150708	https://www.scopus.com/inward/record.uri?eid=2-s2.0-85116264513&doi=10.1016%2fj.scitotenv.2021.150708&partnerID=40&md5=5bc52ce5718b76d00f095910b19ec68e	Bioaugmentation; Bioremediation; Contaminated marine sediments; Hydrocarbon pollution; Microbial community	English	Article	Final		Scopus	2-s2.0-85116264513
Zhou Z., Zhang C.-J., Liu P.-F., Fu L., Laso-Pérez R., Yang L., Bai L.-P., Li J., Yang M., Lin J.-Z., Wang W.-D., Wegener G., Li M., Cheng L.	57223300654;57217247345;57193449874;57382226500;57192009611;57189220632;57224782325;56034093400;57212156524;56331723200;56969961600;23768265000;57199160246;57118601200;	Non-syntrophic methanogenic hydrocarbon degradation by an archaeal species	2022	Nature	24	10.1038/s41586-021-04235-2	https://www.scopus.com/inward/record.uri?eid=2-s2.0-85121523132&doi=10.1038%2fs41586-021-04235-2&partnerID=40&md5=a176878845490f77b7a1f5ddb39d4d40		English	Article	Final	All Open Access, Green	Scopus	2-s2.0-85121523132
Gao Z., Zhou W., Lv X., Wang X.	57653529900;57652973100;57654080300;57655177300;	Metabolomics as a Critical Tool for Studying Clinical Surgery	2022	Critical Reviews in Analytical Chemistry		10.1080/10408347.2022.2162810	https://www.scopus.com/inward/record.uri?eid=2-s2.0-85145452954&doi=10.1080%2f10408347.2022.2162810&partnerID=40&md5=433ae4e1a5a3f2e9d9949727c398538c	biomarkers; clinical surgery; metabolomics; organ transplantation; precision medicine; screening and diagnosis	English	Review	Article in Press		Scopus	2-s2.0-85145452954
Brzeszcz J., Skalski T., Jankowski L., Kapusta P.	36679629700;15122397200;23469606000;7005918752;	How do microbial communities deal with chronic hydrocarbon presence in oil seep soils? Data from historical hand-dug oil wells	2022	Land Degradation and Development		10.1002/ldr.4531	https://www.scopus.com/inward/record.uri?eid=2-s2.0-85143388864&doi=10.1002%2fldr.4531&partnerID=40&md5=329ceacb14b3be86a916dea1c11a64bc	bacterial community structure; historical hand-dug oil wells; hydrocarbon degraders diversity; natural oil seep; soil environments	English	Article	Article in Press		Scopus	2-s2.0-85143388864
Lahme S., Mand J., Oparaodu K., Enning D.	54901378900;55838460000;57987893700;37664756300;	Detection and Monitoring of Corrosive Oilfield Microorganisms via Novel Biomarker Technologies	2022	Society of Petroleum Engineers - ADIPEC 2022		10.2118/211238-MS	https://www.scopus.com/inward/record.uri?eid=2-s2.0-85143064725&doi=10.2118%2f211238-MS&partnerID=40&md5=a0a9b96b0ea10b8340593d421347f8d1		English	Conference Paper	Final		Scopus	2-s2.0-85143064725
Yuchen J., Shuguang L., Sha L., Dorzhievna R.L., Elena N., Nikolavich M.A., Tavares A.J.	57963754900;57132755600;57964300700;57223901402;57964667700;57963393400;57963755000;	Vertical transport of antibiotic resistance genes in soil affected by rainfall and physical-chemical factors based on one-dimensional soil column experiments	2022	Proceedings of the International Offshore and Polar Engineering Conference			https://www.scopus.com/inward/record.uri?eid=2-s2.0-85141830681&partnerID=40&md5=e606f472ca63ae3d302abceba937adbb	antibiotic resistance genes; one-dimensional soil column experiments; rainfall; vertical transport	English	Conference Paper	Final		Scopus	2-s2.0-85141830681
Li Y., Lu D., Wang W., Li X.	55633281500;57836386100;55713954000;55718335400;	Experimental Study of Dynamic Characteristics of an Ultra-Large Jacket Offshore Wind Turbine Under Wind Loads Using Joint Aero-Hydro-Elastic Similarities	2022	Proceedings of the International Offshore and Polar Engineering Conference			https://www.scopus.com/inward/record.uri?eid=2-s2.0-85141818418&partnerID=40&md5=61f12f41c485b3f03dbde9f92b509052	aerodynamic similarity; coupling mechanisms; dynamic model test; Froude similarity; offshore wind turbine	English	Conference Paper	Final		Scopus	2-s2.0-85141818418
Ladeira I., Le Sourne H., Moran J., Salazar P.	57698602000;6508201473;57944860500;57943400900;	A SEMI-ANALYTICAL METHODOLOGY TO ASSESS THE DYNAMIC ELASTIC RESPONSE OF A MONOPILE OFFSHORE WIND TURBINE SUBJECTED TO LOW-ENERGY SHIP IMPACTS	2022	Proceedings of the International Conference on Offshore Mechanics and Arctic Engineering - OMAE		10.1115/OMAE2022-79672	https://www.scopus.com/inward/record.uri?eid=2-s2.0-85140803260&doi=10.1115%2fOMAE2022-79672&partnerID=40&md5=da9c5aaa07768530d1e5cb19cdd5f8f1	dynamic response; low-energy impact; offshore wind turbine; Ship collision; simplified method	English	Conference Paper	Final		Scopus	2-s2.0-85140803260
Bakhshi F., Firoozeh F., Badmasti F., Dadashi M., Zibaei M., Khaledi A.	57863335600;26655485400;35742872800;57188273700;22939275500;55933434700;	Molecular Detection of OXA-type Carbapenemases among Acinetobacter baumannii Isolated from Burn Patients and Hospital Environments	2022	Open Microbiology Journal	1	10.2174/18742858-V16-E2206101	https://www.scopus.com/inward/record.uri?eid=2-s2.0-85136778571&doi=10.2174%2f18742858-V16-E2206101&partnerID=40&md5=78764082b8afaa421a3397fe9a46ca10	Acinetobacter baumannii; Burn units; Burns centers; Hospital environment; Molecular detection; OXA-type carbapenemases	English	Article	Final		Scopus	2-s2.0-85136778571
Lawrence G.W., McCarthy N., Walsh C.J., Kunyoshi T.M., Lawton E.M., O’Connor P.M., Begley M., Cotter P.D., Guinane C.M.	57214721310;57819480000;56090858400;57820348300;10340404400;7402622563;7006699818;7006716039;6507317709;	Effect of a bacteriocin-producing Streptococcus salivarius on the pathogen Fusobacterium nucleatum in a model of the human distal colon	2022	Gut Microbes		10.1080/19490976.2022.2100203	https://www.scopus.com/inward/record.uri?eid=2-s2.0-85134927605&doi=10.1080%2f19490976.2022.2100203&partnerID=40&md5=fc65d0084edc421fb95f2c0c8b7864f1	bacteriocins; biotherapeutics; colon model; colorectal cancer; Fusobacterium nucleatum; probiotics; Streptococcus salivarius	English	Article	Final	All Open Access, Gold, Green	Scopus	2-s2.0-85134927605
Hu S.	57206723605;	Analysis and Research on Oil Production in Ultra High Water Cut Stage Based on Iots	2022	Lecture Notes on Data Engineering and Communications Technologies		10.1007/978-3-031-05484-6_135	https://www.scopus.com/inward/record.uri?eid=2-s2.0-85132802641&doi=10.1007%2f978-3-031-05484-6_135&partnerID=40&md5=8b50d948f61bfce066d46191b463ac61	Artificial intelligence; Long-term and short-term memory neural network; Machine learning	English	Conference Paper	Final		Scopus	2-s2.0-85132802641
Xiong Y., Hou Z., Xie H., Zhao J., Tan X., Luo J.	57209786963;57698630000;57202217427;8720831200;57681989800;57218645520;	Microbial-mediated CO2 methanation and renewable natural gas storage in depleted petroleum reservoirs: A review of biogeochemical mechanism and perspective	2022	Gondwana Research	4	10.1016/j.gr.2022.04.017	https://www.scopus.com/inward/record.uri?eid=2-s2.0-85130313906&doi=10.1016%2fj.gr.2022.04.017&partnerID=40&md5=bea7711ab3a2c59c5c27bc606117b473	Bio-methanation; CO2 utilization; Depleted reservoir; Methanogenic archaea; Renewable natural gas	English	Article	Article in Press		Scopus	2-s2.0-85130313906
Zubiaga I., Justo R.	57680165600;23473007300;	Multimodal Feature Evaluation and Fusion for Emotional Well-Being Monitorization	2022	Lecture Notes in Computer Science (including subseries Lecture Notes in Artificial Intelligence and Lecture Notes in Bioinformatics)		10.1007/978-3-031-04881-4_20	https://www.scopus.com/inward/record.uri?eid=2-s2.0-85129882229&doi=10.1007%2f978-3-031-04881-4_20&partnerID=40&md5=cbea12a9824e13f2f39110bf45994535	Feature selection; Machine learning; Mental health	English	Conference Paper	Final		Scopus	2-s2.0-85129882229
Zhong M., Liu B., Zhang L., Wang J., Chen J., Li J., Liu Y., Ming L.	57487794100;46661867700;57487303300;57487303400;57487632000;57487632100;57218353996;57487794200;	Experimental Study on Microbial Induced Calcium Carbonate Precipitation to Enhance Reservoir Recovery	2022	Iranian Journal of Biotechnology	2	10.30498/ijb.2021.279942.3024	https://www.scopus.com/inward/record.uri?eid=2-s2.0-85126337152&doi=10.30498%2fijb.2021.279942.3024&partnerID=40&md5=23fd9fd63843a58d8da9919d0cbcb0b3	Environmental protection; MICP; Microorganism; Petroleum engineering	English	Article	Final		Scopus	2-s2.0-85126337152
Karve S., Wagner A.	56603956700;57203495887;	Multiple Novel Traits without Immediate Benefits Originate in Bacteria Evolving on Single Antibiotics	2022	Molecular Biology and Evolution	1	10.1093/molbev/msab341	https://www.scopus.com/inward/record.uri?eid=2-s2.0-85125118740&doi=10.1093%2fmolbev%2fmsab341&partnerID=40&md5=3c83cc4200b2dc5afe3a4f0f3a74cb68	antimicrobials; experimental evolution; novel traits; pleiotropy	English	Article	Final	All Open Access, Gold, Green	Scopus	2-s2.0-85125118740
Hamidian M., Maharjan R.P., Farrugia D.N., Delgado N.N., Dinh H., Short F.L., Kostoulias X., Peleg A.Y., Paulsen I.T., Cain A.K.	23667445400;8610070200;55585796500;57217359275;57206769782;37093966800;14628587700;57202571877;7006799662;26646196000;	Genomic and phenotypic analyses of diverse non-clinical Acinetobacter baumannii strains reveals strain-specific virulence and resistance capacity	2022	Microbial Genomics		10.1099/mgen.0.000765	https://www.scopus.com/inward/record.uri?eid=2-s2.0-85124636484&doi=10.1099%2fmgen.0.000765&partnerID=40&md5=684a491d00595553d541dc839a9cb11d	Acinetobacter baumannii; environmental; Galleria mellonella; genome sequence; MLST; niche adaptation; resistance; virulence	English	Article	Final	All Open Access, Gold, Green	Scopus	2-s2.0-85124636484
Butler J., Kelly S.D., Muddiman K.J., Besinis A., Upton M.	57438510000;57438435700;57223973338;55251683100;35593933700;	Hospital sink traps as a potential source of the emerging multidrug-resistant pathogen Cupriavidus pauculus: Characterization and draft genome sequence of strain MF1	2022	Journal of Medical Microbiology		10.1099/jmm.0.001501	https://www.scopus.com/inward/record.uri?eid=2-s2.0-85123973171&doi=10.1099%2fjmm.0.001501&partnerID=40&md5=ed567227a4a62b7c85ba6b8378bd7036	Biofilm; Cupriavidus pauculus; Galleria mellonella; MF1; Sink trap; Whole genome sequencing	English	Article	Final	All Open Access, Green	Scopus	2-s2.0-85123973171
Barbour A., Elebyary O., Fine N., Oveisi M., Glogauer M.	55888660700;57433915900;57215079197;57190306090;6701857784;	Metabolites of the oral microbiome: Important mediators of multikingdom interactions	2022	FEMS Microbiology Reviews	2	10.1093/femsre/fuab039	https://www.scopus.com/inward/record.uri?eid=2-s2.0-85123807019&doi=10.1093%2ffemsre%2ffuab039&partnerID=40&md5=ab4044189c9ff709fd6a3b5ea30c0979	bacteriocins; host-microbe interactions; microbial metabolites; RiPPs; the oral microbiome	English	Review	Final		Scopus	2-s2.0-85123807019
Lee-Lopez C., Yukl E.	57424702400;12791632600;	H-NOX proteins in the virulence of pathogenic bacteria	2022	Bioscience Reports		10.1042/BSR20212014	https://www.scopus.com/inward/record.uri?eid=2-s2.0-85123389417&doi=10.1042%2fBSR20212014&partnerID=40&md5=eda845a47e58145fcb4111201169d7e9		English	Review	Final	All Open Access, Gold, Green	Scopus	2-s2.0-85123389417
Deng S., Wang B., Su S., Zeng H., Chen R., Ma H., Hu Y., Zheng A., Shu C., Zou J., Li Y., Zhu H., Sun S., She Y., Zhang F.	57226811410;57226814662;56399955100;57408454900;57408799500;57408970100;57875879200;57358214800;57408455000;57409137000;57408276600;57408622200;23111564700;7006618632;57296812600;	Microbial community diversity and potential bioremediation of drill cuttings in two oil reservoirs	2022	Petroleum Science and Technology		10.1080/10916466.2021.2024228	https://www.scopus.com/inward/record.uri?eid=2-s2.0-85122668566&doi=10.1080%2f10916466.2021.2024228&partnerID=40&md5=65c4e294f33a5c65707bd9c88b4980f1	bioremediation; biosurfactant; degrade; drill cuttings (DCs); microbial community	English	Article	Final		Scopus	2-s2.0-85122668566
Su Z., Wang S., Yang S., Yin Y., Cao Y., Li G., Ma T.	57387267100;48661509600;57387267200;57387267300;57386519300;55711209100;55728800200;	Genetic and comparative genome analysis of Exiguobacterium aurantiacum SW‐20, a petroleum‐degrading bacteria with salt tolerance and heavy metal‐tolerance isolated from produced water of Changqing oilfield, China	2022	Microorganisms	4	10.3390/microorganisms10010066	https://www.scopus.com/inward/record.uri?eid=2-s2.0-85121765821&doi=10.3390%2fmicroorganisms10010066&partnerID=40&md5=d8b919e7d471c557926a096971b285c4	Alkane degradation; Comparative genomics; E. aurantiacum SW‐20; Heavy metal tolerance; Salt‐tolerance	English	Article	Final	All Open Access, Gold, Green	Scopus	2-s2.0-85121765821
Shahabi-Ghahfarokhy A., Nakhaei-Kohani R., Nait Amar M., Hemmati-Sarapardeh A.	57328006400;57327577300;57203039467;55556311300;	Modelling density of pure and binary mixtures of normal alkanes: Comparison of hybrid soft computing techniques, gene expression programming, and equations of state	2022	Journal of Petroleum Science and Engineering	4	10.1016/j.petrol.2021.109737	https://www.scopus.com/inward/record.uri?eid=2-s2.0-85118751362&doi=10.1016%2fj.petrol.2021.109737&partnerID=40&md5=801a021fe66904005a5da9b477fee92b	Density; EOS; Hydrocarbons; LSSVM; Machine learning; Normal alkane; RBFNN	English	Article	Final		Scopus	2-s2.0-85118751362
Kapse N.G., Paliwal V., Dagar S.S., Rana D.P., Dhakephalkar P.K.	56512195200;54788153400;35229129200;57209091610;6506605166;	Genomics and simulated laboratory studies reveal Thermococcus sp. 101C5 as a novel hyperthermophilic archaeon possessing a specialized metabolic arsenal for enhanced oil recovery	2022	Antonie van Leeuwenhoek, International Journal of General and Molecular Microbiology		10.1007/s10482-021-01667-8	https://www.scopus.com/inward/record.uri?eid=2-s2.0-85118545014&doi=10.1007%2fs10482-021-01667-8&partnerID=40&md5=207e54e958a9fe2deafa1f78b2fe76d3	Genome; Hyperthermophile; Microbial enhanced oil recovery; Simulated reservoir conditions; Thermococcus	English	Article	Final		Scopus	2-s2.0-85118545014
Datta P., Tiwari P., Pandey L.	57193064762;56539415700;36984082800;	Screening of Extremophiles for Microbial Enhanced Oil Recovery Based on Surface Active Properties	2022	Green Energy and Technology		10.1007/978-981-16-5465-7_5	https://www.scopus.com/inward/record.uri?eid=2-s2.0-85118120216&doi=10.1007%2f978-981-16-5465-7_5&partnerID=40&md5=22fb73cdaea069b10b420fbe3f257466	Extremophiles; Genetic Engineering; Halophiles; Microbial enhanced oil recovery; Screening; Thermophiles	English	Book Chapter	Final		Scopus	2-s2.0-85118120216
Mahdaviara M., Larestani A., Nait Amar M., Hemmati-Sarapardeh A.	57214839505;57226119296;57203039467;55556311300;	On the evaluation of permeability of heterogeneous carbonate reservoirs using rigorous data-driven techniques	2022	Journal of Petroleum Science and Engineering	5	10.1016/j.petrol.2021.109685	https://www.scopus.com/inward/record.uri?eid=2-s2.0-85117946823&doi=10.1016%2fj.petrol.2021.109685&partnerID=40&md5=4d6b702418e4db5f02b9563cd0f2dc91	Absolute permeability; Artificial intelligence; Carbonate reservoir; Neural network; Smart models	English	Article	Final		Scopus	2-s2.0-85117946823
Astuti D.I., Purwasena I.A., Priharto N., Ariadji T., Afifah L.N., Saputro R.B., Aditiawati P., Persada G.P., Ananggadipa A.A., Abqory M.H., Amaniyah M., Dewi U.R.	36136584000;36093273900;55001825400;6504190568;57297624100;57298032800;24779568900;57201117806;57201119338;57201122140;57206479989;57201117128;	Bacterial community dynamics during MEOR biostimulation of an oil reservoir in sumatera Indonesia	2022	Journal of Petroleum Science and Engineering	1	10.1016/j.petrol.2021.109558	https://www.scopus.com/inward/record.uri?eid=2-s2.0-85117188333&doi=10.1016%2fj.petrol.2021.109558&partnerID=40&md5=a20be1a82e89796100d56dd0c38e0e52	Bacterial community; Ilumina miseq; MEOR; Nutrient optimization; Response surface method	English	Article	Final		Scopus	2-s2.0-85117188333
Bhadra T., Mallik S., Sohel A., Zhao Z.	55332565700;56213777000;57219118788;57211415623;	Unsupervised Feature Selection Using an Integrated Strategy of Hierarchical Clustering With Singular Value Decomposition: An Integrative Biomarker Discovery Method With Application to Acute Myeloid Leukemia	2022	IEEE/ACM Transactions on Computational Biology and Bioinformatics	2	10.1109/TCBB.2021.3110989	https://www.scopus.com/inward/record.uri?eid=2-s2.0-85114724754&doi=10.1109%2fTCBB.2021.3110989&partnerID=40&md5=18a0836bc5f3cae3e51b20d469d77bec	mutual information; normalized mutual information; Pattern recognition; unsupervised feature selection	English	Article	Final		Scopus	2-s2.0-85114724754
Rojas-Gätjens D., Fuentes-Schweizer P., Rojas-Jiménez K., Pérez-Pantoja D., Avendaño R., Alpízar R., Coronado-Ruíz C., Chavarría M.	57221351972;57206253410;8961501600;6507816775;57189027750;57222439748;57202047568;36658997300;	Methylotrophs and Hydrocarbon-Degrading Bacteria Are Key Players in the Microbial Community of an Abandoned Century-Old Oil Exploration Well	2022	Microbial Ecology	3	10.1007/s00248-021-01748-1	https://www.scopus.com/inward/record.uri?eid=2-s2.0-85104843688&doi=10.1007%2fs00248-021-01748-1&partnerID=40&md5=208d2b3b4b0bdc4a7a3e068d8cbee6aa	Cahuita National Park; Hydrocarbons; Methylobacillus; Methylococcus; Methylorubrum; Methylotrophic bacteria; Oil well; Paracoccus; Pseudomonas	English	Article	Final	All Open Access, Green	Scopus	2-s2.0-85104843688
Badi S., Salah Abbassi M., Snoussi M., Werheni R., Hammami S., Maal-Bared R., Hassen A.	57191038021;57217058195;23981274000;57210347581;57210989728;12762191200;7005631805;	High rates of antibiotic resistance and biofilm production in Escherichia coli isolates from food products of animal and vegetable origins in Tunisia: a real threat to human health	2022	International Journal of Environmental Health Research	5	10.1080/09603123.2020.1769039	https://www.scopus.com/inward/record.uri?eid=2-s2.0-85085962684&doi=10.1080%2f09603123.2020.1769039&partnerID=40&md5=420d6c3c2dc285c62cb78f58e6c046b1	Antibiotic resistance; biofilm production; escherichia coli; foods of animal origin; Tunisia; vegetables	English	Article	Final		Scopus	2-s2.0-85085962684
Voskoboinikov G., Pugovkin D., Metelkova L.	7004206680;57192870214;57202266490;	The experimental research of sorption and destruction of diesel fuel by fucus algae of the Barents sea	2021	IOP Conference Series: Earth and Environmental Science		10.1088/1755-1315/937/2/022058	https://www.scopus.com/inward/record.uri?eid=2-s2.0-85122398702&doi=10.1088%2f1755-1315%2f937%2f2%2f022058&partnerID=40&md5=adc3284d6576099f937ce7e8b9d231ad		English	Conference Paper	Final	All Open Access, Gold	Scopus	2-s2.0-85122398702
Flores-Vargas G., Bergsveinson J., Lawrence J.R., Korber D.R.	57391169900;55062333100;55251931700;7004492601;	Environmental Biofilms as Reservoirs for Antimicrobial Resistance	2021	Frontiers in Microbiology	12	10.3389/fmicb.2021.766242	https://www.scopus.com/inward/record.uri?eid=2-s2.0-85121984975&doi=10.3389%2ffmicb.2021.766242&partnerID=40&md5=4c74013e11c9153862906ad9330fbed5	antibiotic resistance; bacteriophage; biofilms; environmental resistome; reservoirs; sub-minimum inhibitory concentration	English	Review	Final	All Open Access, Gold, Green	Scopus	2-s2.0-85121984975
Voskuhl L., Akbari A., Müller H., Pannekens M., Brusilova D., Dyksma S., Haque S., Graupner N., Dunthorn M., Meckenstock R.U., Brauer V.S.	57216912303;35955695900;57188873374;57204874465;57436631300;56048286000;14035388800;57192910599;15757155200;7005916698;16041675600;	Indigenous microbial communities in heavy oil show a threshold response to salinity	2021	FEMS Microbiology Ecology	5	10.1093/femsec/fiab157	https://www.scopus.com/inward/record.uri?eid=2-s2.0-85123901398&doi=10.1093%2ffemsec%2ffiab157&partnerID=40&md5=2447389ba51a6487675ffd95531a8400	diversity; microbial community assembly; microbiome; microhabitat; Pitch Lake; salt	English	Article	Final	All Open Access, Hybrid Gold, Green	Scopus	2-s2.0-85123901398
Grassmann A.A., Zavala-Alvarado C., Bettin E.B., Picardeau M., Benaroudj N., Caimano M.J.	24553927300;55933274500;57206889814;6701694004;6602217879;6701551795;	The FUR-like regulators PerRA and PerRB integrate a complex regulatory network that promotes mammalian host-adaptation and virulence of Leptospira interrogans	2021	PLoS Pathogens	1	10.1371/journal.ppat.1009078	https://www.scopus.com/inward/record.uri?eid=2-s2.0-85121320782&doi=10.1371%2fjournal.ppat.1009078&partnerID=40&md5=a217d14d8472c1db09517c905a868c67		English	Article	Final	All Open Access, Gold, Green	Scopus	2-s2.0-85121320782
Phoka T., Fule L., da Fonseca J.P., Cokelaer T., Picardeau M., Patarakul K.	57253208400;57321287400;57195398094;35227101900;6701694004;21035558800;	Investigating the role of the carbon storage regulator A (CsrA) in Leptospira spp.	2021	PLoS ONE	2	10.1371/journal.pone.0260981	https://www.scopus.com/inward/record.uri?eid=2-s2.0-85121317653&doi=10.1371%2fjournal.pone.0260981&partnerID=40&md5=99353349e9efcd6c9bf36ebddf0e8c31		English	Article	Final	All Open Access, Gold, Green	Scopus	2-s2.0-85121317653
Pereira G.F., Pilz-Junior H.L., Corção G.	56763485500;57200421769;16318599600;	The impact of bacterial diversity on resistance to biocides in oilfields	2021	Scientific Reports	2	10.1038/s41598-021-02494-7	https://www.scopus.com/inward/record.uri?eid=2-s2.0-85120062361&doi=10.1038%2fs41598-021-02494-7&partnerID=40&md5=a6ef3557ba9a9e1c19d613b656642a7d		English	Article	Final	All Open Access, Gold, Green	Scopus	2-s2.0-85120062361
Tiburcio S.R.G., Macrae A., Peixoto R.S., da Costa Rachid C.T.C., Mansoldo F.R.P., Alviano D.S., Alviano C.S., Ferreira D.F., de Queiroz Venâncio F., Ferreira D.F., Vermelho A.B.	57191481860;7005453570;6701414754;57217987126;57209513554;6603411792;7005838352;57200671335;57300875000;57301013900;6701599601;	Sulphate-reducing bacterial community structure from produced water of the Periquito and Galo de Campina onshore oilfields in Brazil	2021	Scientific Reports	4	10.1038/s41598-021-99196-x	https://www.scopus.com/inward/record.uri?eid=2-s2.0-85117393986&doi=10.1038%2fs41598-021-99196-x&partnerID=40&md5=a6ad4e8a9bf1e5177eef33926a67b4ff		English	Article	Final	All Open Access, Gold, Green	Scopus	2-s2.0-85117393986
Strittmatter T., Argast P., Buchman P., Krawczyk K., Fussenegger M.	57220634350;56285732500;57189664003;57214425259;7005958681;	Control of gene expression in engineered mammalian cells with a programmable shear-stress inducer	2021	Biotechnology and Bioengineering	1	10.1002/bit.27939	https://www.scopus.com/inward/record.uri?eid=2-s2.0-85115116683&doi=10.1002%2fbit.27939&partnerID=40&md5=70bfe24a4a04ac879c24e52a99b7bb22	mechanoperception; MscL; NFAT; Piezo1	English	Article	Final	All Open Access, Hybrid Gold, Green	Scopus	2-s2.0-85115116683
Huang L., Ye J., Jiang K., Wang Y., Li Y.	57196236934;15830437100;57242735600;57213624459;57003808200;	Oil contamination drives the transformation of soil microbial communities: Co-occurrence pattern, metabolic enzymes and culturable hydrocarbon-degrading bacteria	2021	Ecotoxicology and Environmental Safety	14	10.1016/j.ecoenv.2021.112740	https://www.scopus.com/inward/record.uri?eid=2-s2.0-85114099760&doi=10.1016%2fj.ecoenv.2021.112740&partnerID=40&md5=8b5167846fc74f91b847048f89317dd8	Biomarker; Culturable bacteria; k-core decomposition; Metabolism enzyme; Oil pollution	English	Article	Final	All Open Access, Gold	Scopus	2-s2.0-85114099760
Zhuang P., Greenberg Z., He M.	57196461265;57210011594;56844213200;	Biologically Enhanced Starch Bio-Ink for Promoting 3D Cell Growth	2021	Advanced Materials Technologies	12	10.1002/admt.202100551	https://www.scopus.com/inward/record.uri?eid=2-s2.0-85112641526&doi=10.1002%2fadmt.202100551&partnerID=40&md5=cca1362dac54c20eedec6d6bf7aaa71b	3D bioprinting; collagen; nanoparticles; starch; tissue engineering	English	Article	Final	All Open Access, Green	Scopus	2-s2.0-85112641526
Zhang Q., Xu S., Li Y., Ding P., Zhang Y., Zhao P.	18938056800;57223013882;56122753500;57214072322;57223007441;57226480421;	Green-synthesized nickel oxide nanoparticles enhances biohydrogen production of Klebsiella sp. WL1316 using lignocellulosic hydrolysate and its regulatory mechanism	2021	Fuel	14	10.1016/j.fuel.2021.121585	https://www.scopus.com/inward/record.uri?eid=2-s2.0-85111690188&doi=10.1016%2fj.fuel.2021.121585&partnerID=40&md5=85f2b1f1837fba86833d7f376f4cb498	Fermentative hydrogen production; Green synthesis; Hydrogenase activity; Klebsiella sp. WL1316; Lignocellulosic hydrolysate; Nickel oxide nanoparticles	English	Article	Final		Scopus	2-s2.0-85111690188
Schwarz E.L., Kelly J.M., Blum K.M., Hor K.N., Yates A.R., Zbinden J.C., Verma A., Lindsey S.E., Ramachandra A.B., Szafron J.M., Humphrey J.D., Shin’oka T., Marsden A.L., Breuer C.K.	57226324610;57205589894;57188583513;25724362600;36946997900;57202535278;57192365519;56335850800;56050243100;55893309900;55437364800;7004193531;7006851741;35596532800;	Hemodynamic performance of tissue-engineered vascular grafts in Fontan patients	2021	npj Regenerative Medicine	12	10.1038/s41536-021-00148-w	https://www.scopus.com/inward/record.uri?eid=2-s2.0-85111164783&doi=10.1038%2fs41536-021-00148-w&partnerID=40&md5=ee878f9e407a4700b211057fce25d138		English	Article	Final	All Open Access, Gold, Green	Scopus	2-s2.0-85111164783
Jagielski J., Przysiecka Ł., Flak D., Diak M., Pietralik-Molińska Z., Kozak M., Jurga S., Nowaczyk G.	57222402010;55914173200;55339244000;56094650400;35771382900;7102680957;7004205616;8115308900;	Comprehensive and comparative studies on nanocytotoxicity of glyceryl monooleate- and phytantriol-based lipid liquid crystalline nanoparticles	2021	Journal of Nanobiotechnology	3	10.1186/s12951-021-00913-5	https://www.scopus.com/inward/record.uri?eid=2-s2.0-85107153951&doi=10.1186%2fs12951-021-00913-5&partnerID=40&md5=188cecaa8c4bff1bc8a49ff7afaa2e56	Cellular internalization; Cubosomes; Cytoskeleton integrity; Cytotoxicity; Genotoxicity; Reactive oxygen species generation	English	Article	Final	All Open Access, Gold, Green	Scopus	2-s2.0-85107153951
Zhao F., Wang Q., Zhang Y., Lei L.	57201304059;57223992225;57196210679;57214898354;	Anaerobic biosynthesis of rhamnolipids by Pseudomonas aeruginosa: performance, mechanism and its application potential for enhanced oil recovery	2021	Microbial Cell Factories	6	10.1186/s12934-021-01593-4	https://www.scopus.com/inward/record.uri?eid=2-s2.0-85106590139&doi=10.1186%2fs12934-021-01593-4&partnerID=40&md5=dbd97e309d15359161f2188e2a4cbbf9	Anaerobic biosynthesis; Glycerol; Microbial enhanced oil recovery; Pseudomonas aeruginosa; Rhamnolipids; RmlBDAC	English	Article	Final	All Open Access, Gold, Green	Scopus	2-s2.0-85106590139
Buberg M.L., Mo S.S., Sekse C., Sunde M., Wasteson Y., Witsø I.L.	57218255930;56059142600;8730262400;8894492700;7003286085;38863575600;	Population structure and uropathogenic potential of extended-spectrum cephalosporin-resistant Escherichia coli from retail chicken meat	2021	BMC Microbiology	3	10.1186/s12866-021-02160-y	https://www.scopus.com/inward/record.uri?eid=2-s2.0-85103564906&doi=10.1186%2fs12866-021-02160-y&partnerID=40&md5=90650f7788a6365e98959e97ee6e8f19	AMR; Antimicrobial resistance; E. coli; Foodborne; Norway; Phenotype; Poultry; Urinary tract infection; UTI; Virulence	English	Article	Final	All Open Access, Gold, Green	Scopus	2-s2.0-85103564906
Ovens K., Maleki F., Eames B.F., McQuillan I.	55458998800;57190584699;6602761639;57203046065;	Juxtapose: a gene-embedding approach for comparing co-expression networks	2021	BMC Bioinformatics	4	10.1186/s12859-021-04055-1	https://www.scopus.com/inward/record.uri?eid=2-s2.0-85102658522&doi=10.1186%2fs12859-021-04055-1&partnerID=40&md5=2f5e7c0a69c41c148c4fa661ba219950	Embedding; Evolution; Gene co-expression networks; Machine learning; Transcriptomics; Word2vec	English	Article	Final	All Open Access, Gold, Green	Scopus	2-s2.0-85102658522
Bai X., Liu D., Xu L., Tenguria S., Drolia R., Gallina N.L.F., Cox A.D., Koo O.-K., Bhunia A.K.	56459390600;57202806046;57220207807;55973107100;56857437000;57222045435;57209822576;26531368100;35415398700;	Biofilm-isolated Listeria monocytogenes exhibits reduced systemic dissemination at the early (12–24 h) stage of infection in a mouse model	2021	npj Biofilms and Microbiomes	10	10.1038/s41522-021-00189-5	https://www.scopus.com/inward/record.uri?eid=2-s2.0-85101135613&doi=10.1038%2fs41522-021-00189-5&partnerID=40&md5=d24c157cbdbed54d8cbc7d40b35b48e1		English	Article	Final	All Open Access, Gold, Green	Scopus	2-s2.0-85101135613
Owino B.O., Mwangi J.M., Kiplagat S., Mwangi H.N., Ingonga J.M., Chebet A., Ngumbi P.M., Villinger J., Masiga D.K., Matoke-Muhia D.	57211526784;57211527194;57221347104;57221354290;26435864400;57221351541;6602360910;24833730000;6602245060;57170814600;	Molecular detection of Leishmania donovani, Leishmania major, and Trypanosoma species in Sergentomyia squamipleuris sand flies from a visceral leishmaniasis focus in Merti sub-County, eastern Kenya	2021	Parasites and Vectors	1	10.1186/s13071-020-04517-0	https://www.scopus.com/inward/record.uri?eid=2-s2.0-85100126963&doi=10.1186%2fs13071-020-04517-0&partnerID=40&md5=1eed47bb723c14dac4ca4167d0293e28	Kenya; Leishmania; Leishmaniasis; Phlebotomus; Sand fly; Sergentomyia; Trypanosoma; Visceral leishmaniasis; Zoonotic cutaneous leishmaniasis	English	Article	Final	All Open Access, Gold, Green	Scopus	2-s2.0-85100126963
Shou L.-B., Liu Y.-F., Zhou J., Liu Z.-L., Zhou L., Liu J.-F., Yang S.-Z., Gu J.-D., Mu B.-Z.	57209295757;57285027300;57189605723;57218528408;55710625100;36096880500;8719114200;7403129601;55509556000;	New evidence for a hydroxylation pathway for anaerobic alkane degradation supported by analyses of functional genes and signature metabolites in oil reservoirs	2021	AMB Express	3	10.1186/s13568-020-01174-5	https://www.scopus.com/inward/record.uri?eid=2-s2.0-85099388365&doi=10.1186%2fs13568-020-01174-5&partnerID=40&md5=61e37b0beeb23aa50f111a474b989276	Alkane hydroxylation; Biodegradation; PCR detection; Primer design; Signature biomarker	English	Article	Final	All Open Access, Gold, Green	Scopus	2-s2.0-85099388365
Zhang R., Sun M., Zhang H., Zhao Z.	57199381065;57300530400;57219803581;7404148282;	Spatial separation of microbial communities reflects gradients of salinity and temperature in offshore sediments from Shenzhen, south China	2021	Ocean and Coastal Management		10.1016/j.ocecoaman.2021.105904	https://www.scopus.com/inward/record.uri?eid=2-s2.0-85117377812&doi=10.1016%2fj.ocecoaman.2021.105904&partnerID=40&md5=90418590ea1007fa5f1ca29a40231118	16S rRNA sequencing; Coastal diversity; Microbial communities; Offshore sediments; Shenzhen	English	Article	Final		Scopus	2-s2.0-85117377812
Huang Shaohua, Mingkuan Q., Zhangyue L., Fuli D., Xiao H., Qiang G., Licheng J.	57446442700;56809333400;57446442800;57446803100;57446533400;57446898400;57446712100;	Characteristics and Genesis of Organic Matter within the Lower Member of Yaojia Formation and its Implications for Tabular-type Uranium Deposits in the Southwest of Songliao Basin	2021	Geology of Ore Deposits		10.1134/S1075701521310019	https://www.scopus.com/inward/record.uri?eid=2-s2.0-85124370705&doi=10.1134%2fS1075701521310019&partnerID=40&md5=a46f6c90771e48fb3cafe3b5d4ee94f7	Lower member of the Yaojia Formation; ore-forming model; organic matter; sandstone-hosted uranium deposit; Songliao Basin	English	Article	Final		Scopus	2-s2.0-85124370705
Dutta A., Valle F., Goldman T., Keating J., Burke E., Williamson N., Dirmeier R., Bowman J.S.	57191752767;57356131000;57220873463;57355139200;57355139300;57355139400;57445142800;7401849722;	Detection of sulfate-reducing bacteria as an indicator for successful mitigation of sulfide production	2021	Applied and Environmental Microbiology	2	10.1128/AEM.01748-21	https://www.scopus.com/inward/record.uri?eid=2-s2.0-85120037961&doi=10.1128%2fAEM.01748-21&partnerID=40&md5=32384e03f4e989a5cf928713aaa1204a	Biofilms; Mitigation; Potential indicator; Sulfate-reducing bacteria	English	Article	Final	All Open Access, Green	Scopus	2-s2.0-85120037961
Bedoya K., Niño J., Acero J., Jaimes-Prada R., Cabarcas F., Alzate J.F.	25951362300;57344045500;7005040144;55620680700;6508131849;35514157100;	Metagenomic Analysis of Biocide-Treated Neotropical Oil Reservoir Water Unveils Microdiversity of Thermophile Tepidiphilus	2021	Frontiers in Microbiology	1	10.3389/fmicb.2021.741555	https://www.scopus.com/inward/record.uri?eid=2-s2.0-85119262399&doi=10.3389%2ffmicb.2021.741555&partnerID=40&md5=a09916c6340609b443dc6075979af7a9	biocide resistance; comparative genomics; extremophile; metagenomics; Tepidiphilus; thermophile	English	Article	Final	All Open Access, Gold, Green	Scopus	2-s2.0-85119262399
Zhao W., Guo Q., Dong L., Wang P., Su Z., Zhang X., Lu X., Li S., Ma P.	56547711400;55460040600;57220885549;55974569600;57220976942;55844854900;56137238300;36483167600;36161919900;	Transcriptome and proteome analysis of Bacillus subtilis NCD-2 response to l-proline from cotton root exudates [枯草芽孢杆菌 NCD-2 对棉花根系分泌物 L-脯氨酸响应的转录-蛋白质组学联合分析]	2021	Scientia Agricultura Sinica		10.3864/j.issn.0578-1752.2021.21.009	https://www.scopus.com/inward/record.uri?eid=2-s2.0-85119145760&doi=10.3864%2fj.issn.0578-1752.2021.21.009&partnerID=40&md5=3de9944ee28519986f9cbffe55acf911	Bacillus subtilis; Interaction relationship; L-proline; Proteome; Transcriptome	Chinese	Article	Final		Scopus	2-s2.0-85119145760
Al-Marri T., Al-Marri A., Al-Zanbaqi R., Ajmi A.A., Fayez M.	57213594780;57338011200;57338457200;57337565000;57201602518;	Multidrug resistance, biofilm formation, and virulence genes of Escherichia coli from backyard poultry farms	2021	Veterinary World	2	10.14202/vetworld.2021.2869-2877	https://www.scopus.com/inward/record.uri?eid=2-s2.0-85119050185&doi=10.14202%2fvetworld.2021.2869-2877&partnerID=40&md5=4c0bc46f4179e439f696fa828490ae6f	Backyard broilers; Escherichia coli; Multidrug resistance; Virulence genes	English	Article	Final	All Open Access, Gold, Green	Scopus	2-s2.0-85119050185
Afzali S., Mohamadi-Baghmolaei M., Zendehboudi S.	57194651662;57191267384;37014087800;	Application of gene expression programming (Gep) in modeling hydrocarbon recovery in wag injection process	2021	Energies	3	10.3390/en14217131	https://www.scopus.com/inward/record.uri?eid=2-s2.0-85118574904&doi=10.3390%2fen14217131&partnerID=40&md5=7955fb2658eee5627559b40428816d62	Empirical correlation; Gene expression programing; Oil recovery; Statistical analysis; WAG injection	English	Article	Final	All Open Access, Gold	Scopus	2-s2.0-85118574904
Scheffer G., Hubert C.R.J., Enning D.R., Lahme S., Mand J., de Rezende J.R.	57197864653;7005155531;37664756300;54901378900;55838460000;57202693291;	Metagenomic investigation of a low diversity, high salinity offshore oil reservoir	2021	Microorganisms	3	10.3390/microorganisms9112266	https://www.scopus.com/inward/record.uri?eid=2-s2.0-85118204094&doi=10.3390%2fmicroorganisms9112266&partnerID=40&md5=913685c674b13d967f5170b34faae9e7	Formation water; Gulf of Mexico; Halophiles; Marine subsurface; Metagenomics; Metal acquisition; Microbial adaptation; Microbial persistence; Polyextremophiles; Radionuclide resistance	English	Article	Final	All Open Access, Gold, Green	Scopus	2-s2.0-85118204094
Wang H., Kuang S., Lang Q., Wang L.	57189446233;7006330384;55170628200;55870817259;	Bacterial community structure of aged oil sludge contaminated soil revealed by illumina high-throughput sequencing in East China	2021	World Journal of Microbiology and Biotechnology	1	10.1007/s11274-021-03059-6	https://www.scopus.com/inward/record.uri?eid=2-s2.0-85115762670&doi=10.1007%2fs11274-021-03059-6&partnerID=40&md5=d6b9b412d6ea695a0ea2fda325b444c4	Aged oil sludge; Bacterial diversity; High throughput sequencing; Soil	English	Article	Final		Scopus	2-s2.0-85115762670
Song Z., Zhu P., Wu X., Xu P., Li H., Du C., He X., Yang L., Zhu W.	12144293400;56942856800;55850643800;57220932992;57204854345;13408313500;57224533679;55546858300;11640142300;	Vertical distribution of biofilm communities along an injection wellbore in a deep petroleum reservoir	2021	Journal of Petroleum Science and Engineering	1	10.1016/j.petrol.2021.109024	https://www.scopus.com/inward/record.uri?eid=2-s2.0-85107842888&doi=10.1016%2fj.petrol.2021.109024&partnerID=40&md5=e9b15f9ee1854c0cf1eff3e62cd341eb	Depth-dependent distribution; High-throughput sequencing; Microbial community; Oil reservoir; Wellbore biofilm	English	Article	Final	All Open Access, Bronze	Scopus	2-s2.0-85107842888
Reboul G., Moreira D., Annenkova N.V., Bertolino P., Vershinin K.E., López-García P.	57208528534;7005854171;35067764300;15130725800;8370184700;7003921637;	Marine signature taxa and core microbial community stability along latitudinal and vertical gradients in sediments of the deepest freshwater lake	2021	ISME Journal	3	10.1038/s41396-021-01011-y	https://www.scopus.com/inward/record.uri?eid=2-s2.0-85106287564&doi=10.1038%2fs41396-021-01011-y&partnerID=40&md5=2afce4bd944237651c8e8799dd4a1b28		English	Article	Final	All Open Access, Bronze, Green	Scopus	2-s2.0-85106287564
Singh N.K., Choudhary S.	57221394759;36636877300;	Bacterial and archaeal diversity in oil fields and reservoirs and their potential role in hydrocarbon recovery and bioprospecting	2021	Environmental Science and Pollution Research	6	10.1007/s11356-020-11705-z	https://www.scopus.com/inward/record.uri?eid=2-s2.0-85099047137&doi=10.1007%2fs11356-020-11705-z&partnerID=40&md5=f7682f270fdf9794681e737b6e4315df	Bacterial diversity; Degradation; Geomicrobial prospecting; Hydrocarbon; Oil reservoirs; Petroleum	English	Review	Final		Scopus	2-s2.0-85099047137
Tripathi A.K., Thakur P., Saxena P., Rauniyar S., Gopalakrishnan V., Singh R.N., Gadhamshetty V., Gnimpieba E.Z., Jasthi B.K., Sani R.K.	57201991167;57337576100;57217116818;57193766711;57209779822;57338615100;57203474187;43061216100;8342944000;7005555107;	Gene Sets and Mechanisms of Sulfate-Reducing Bacteria Biofilm Formation and Quorum Sensing With Impact on Corrosion	2021	Frontiers in Microbiology	11	10.3389/fmicb.2021.754140	https://www.scopus.com/inward/record.uri?eid=2-s2.0-85119074335&doi=10.3389%2ffmicb.2021.754140&partnerID=40&md5=2fc2017e2a397c3903935fcb6341b767	2D-materials; biocides; biocorrosion mechanism; biofilm; comparative genomics; microbiologically influenced corrosion; quorum sensing; sulfate reducing bacteria	English	Review	Final	All Open Access, Gold, Green	Scopus	2-s2.0-85119074335
Correa Velez K.E., Norman R.S.	57205483296;23973241600;	Transcriptomic Analysis Reveals That Municipal Wastewater Effluent Enhances Vibrio vulnificus Growth and Virulence Potential	2021	Frontiers in Microbiology		10.3389/fmicb.2021.754683	https://www.scopus.com/inward/record.uri?eid=2-s2.0-85118746600&doi=10.3389%2ffmicb.2021.754683&partnerID=40&md5=35d65de0fbe943e0cf4e736cb7eb22af	climate change; stress response; transcriptomic; Vibrio vulnificus; wastewater	English	Article	Final	All Open Access, Gold, Green	Scopus	2-s2.0-85118746600
Enany S., Piccirillo A., Elhadidy M., Tryjanowski P.	23972375400;15042747100;37060642600;35606442700;	Editorial: The Role of Environmental Reservoirs in Campylobacter-Mediated Infection	2021	Frontiers in Cellular and Infection Microbiology	1	10.3389/fcimb.2021.773436	https://www.scopus.com/inward/record.uri?eid=2-s2.0-85119048356&doi=10.3389%2ffcimb.2021.773436&partnerID=40&md5=36fd71d85195e75dd5041955bbb1a441	biofilm formation; Campylobacter ecology; campylobacteriosis; infection; whole genome sequencing	English	Editorial	Final	All Open Access, Gold, Green	Scopus	2-s2.0-85119048356
Lu Y., Zhang Y., Zhong C., Martin J.W., Alessi D.S., Goss G.G., Ren Y., He Y.	57218254863;55553708400;57203780314;9270827400;7006548150;7007032058;57224806468;16241582000;	Suspended solids-associated toxicity of hydraulic fracturing flowback and produced water on early life stages of zebrafish (Danio rerio)	2021	Environmental Pollution	4	10.1016/j.envpol.2021.117614	https://www.scopus.com/inward/record.uri?eid=2-s2.0-85108321275&doi=10.1016%2fj.envpol.2021.117614&partnerID=40&md5=029f04fb0c86a1272ef98cf57cc3b8fa	Flowback and produced water (FPW); Hydraulic fracturing (HF); Polycyclic aromatic hydrocarbons (PAHs); Suspended solids (SS); Toxicity; Zebrafish embryo	English	Article	Final		Scopus	2-s2.0-85108321275
Yun Y., Gui Z., Xie J., Chen Y., Tian X., Li G., Gu J.-D., Ma T.	56956317600;57224173289;57109613800;57210909133;57195411851;55711209100;7403129601;55728800200;	Stochastic assembly process dominates bacterial succession during a long-term microbial enhanced oil recovery	2021	Science of the Total Environment	7	10.1016/j.scitotenv.2021.148203	https://www.scopus.com/inward/record.uri?eid=2-s2.0-85107595158&doi=10.1016%2fj.scitotenv.2021.148203&partnerID=40&md5=f62134f9648163d9583278e4f0ec2733	Co-occurrence network; Community assembly; Hydrocarbon degrading bacteria; Microbial enhanced oil recovery; Oil reservoir	English	Article	Final	All Open Access, Hybrid Gold	Scopus	2-s2.0-85107595158
Li J.-Y., Wang L., Liu Y.-F., Zhou L., Gang H.-Z., Liu J.-F., Yang S.-Z., Mu B.-Z.	57272331400;57273563100;57285027300;55710625100;23466831600;36096880500;8719114200;55509556000;	Microbial lipopeptide-producing strains and their metabolic roles under anaerobic conditions	2021	Microorganisms	5	10.3390/microorganisms9102030	https://www.scopus.com/inward/record.uri?eid=2-s2.0-85115811548&doi=10.3390%2fmicroorganisms9102030&partnerID=40&md5=2a70b5e1ac4f265a9a1bd70627671f34	Anaerobic bacteria; Biosurfactant; Nitrate respiration; Non-ribosomal peptide synthetase (NRPSs)	English	Review	Final	All Open Access, Gold, Green	Scopus	2-s2.0-85115811548
Mahdaviara M., Rostami A., Shahbazi K.	57214839505;57188924492;14061246600;	Smart learning strategy for predicting viscoelastic surfactant (VES) viscosity in oil well matrix acidizing process using a rigorous mathematical approach	2021	SN Applied Sciences	4	10.1007/s42452-021-04799-8	https://www.scopus.com/inward/record.uri?eid=2-s2.0-85115750693&doi=10.1007%2fs42452-021-04799-8&partnerID=40&md5=7653c47d5598a2b751a09ee656c7480f	Artificial intelligence; Carbonate rock; Gene expression programming; Matrix acidizing; Viscoelastic surfactant	English	Article	Final	All Open Access, Gold	Scopus	2-s2.0-85115750693
Ouyang J., Sun L., Pan J., Zeng Z., Zeng C., Zeng F., Tian M., Wu S.	57191409849;57191822129;57219413688;57212214222;57201631776;7202911280;7202800259;7407181724;	A Targeted Nanosystem for Detection of Inflammatory Diseases via Fluorescent/Optoacoustic Imaging and Therapy via Modulating Nrf2/NF-κB Pathways	2021	Small	10	10.1002/smll.202102598	https://www.scopus.com/inward/record.uri?eid=2-s2.0-85114898056&doi=10.1002%2fsmll.202102598&partnerID=40&md5=ecf457d62e5928680f0081e76487b492	active targeting; near-infrared fluorescent imaging; NF-κB; Nrf2; on-site drug release; optoacoustic imaging; reactive oxygen species-activatable	English	Article	Final		Scopus	2-s2.0-85114898056
Han Z., Lu J., An W., Zhang Y., Yang M.	57200093357;57200881542;53864640800;57211360019;57226848031;	Removal efficacy of opportunistic pathogen gene markers in drinking water supply systems: an in situ and large-scale molecular investigation	2021	Environmental Science and Pollution Research		10.1007/s11356-021-15744-y	https://www.scopus.com/inward/record.uri?eid=2-s2.0-85112443835&doi=10.1007%2fs11356-021-15744-y&partnerID=40&md5=24e1282fd7bb20a1b0c488121e7ee208	Biogeography; Drinking water treatment; Healthy risk; Tap water; Water safety; Waterborne diseases	English	Article	Final		Scopus	2-s2.0-85112443835
Jathar S., Shinde D., Dakhni S., Fernandes A., Jha P., Desai N., Jobby R.	57226608352;57226602066;57226609770;57226612296;55542246200;7102029059;55542081200;	Identification and characterization of chlorine-resistant bacteria from water distribution sites of Mumbai	2021	Archives of Microbiology	1	10.1007/s00203-021-02503-3	https://www.scopus.com/inward/record.uri?eid=2-s2.0-85112057423&doi=10.1007%2fs00203-021-02503-3&partnerID=40&md5=f7d9d1d30582221e2bb9bdefd36b2ccf	Antibiotic resistance; Biofilm production; Chlorination; Chlorine-resistant bacteria	English	Article	Final		Scopus	2-s2.0-85112057423
Oliveira V.H., Sousa M.C., Picado A., Mendes R., Ribeiro A.S., Morgado F., Dias J.M.	55393382400;25923978100;57001018600;57206896530;57191167295;7003704328;55947194400;	Coupled modelling of the interaction between dissolved substances emitted by Minho and Lima estuarine outflows (Portugal)	2021	Journal of Marine Systems	2	10.1016/j.jmarsys.2021.103601	https://www.scopus.com/inward/record.uri?eid=2-s2.0-85107814416&doi=10.1016%2fj.jmarsys.2021.103601&partnerID=40&md5=a1fb2df26bb4239eeacb2d54f681cddc	Coupled modelling; Delft3D; Estuarine outflows; Lima river; Minho river; Passive tracers	English	Article	Final		Scopus	2-s2.0-85107814416
Wang X., Lv Z., Han B., Li S., Yang Q., Wu P., Li J., Han B., Deng N., Zhang Z.	23096017700;57190843659;57208106733;57194446425;57211039425;57211039475;57202550990;57223322662;57209394059;55613238975;	The aggravation of allergic airway inflammation with dibutyl phthalate involved in Nrf2-mediated activation of the mast cells	2021	Science of the Total Environment	8	10.1016/j.scitotenv.2021.148029	https://www.scopus.com/inward/record.uri?eid=2-s2.0-85107148999&doi=10.1016%2fj.scitotenv.2021.148029&partnerID=40&md5=4aef4d38a0e5b3517e033f263c3cf018	Allergic airway inflammation; Dibutyl phthalate; Mast cells; Nrf2; Oxidative stress; Sulforaphane	English	Article	Final		Scopus	2-s2.0-85107148999
Zárate A., Dorador C., Valdés J., Molina V., Icaza G., Pacheco A.S., Castillo A.	55498620900;23666723800;7103076508;8215374700;57201989422;14070686100;54893614300;	Benthic microbial diversity trends in response to heavy metals in an oxygen-deficient eutrophic bay of the Humboldt current system offshore the Atacama Desert	2021	Environmental Pollution	6	10.1016/j.envpol.2021.117281	https://www.scopus.com/inward/record.uri?eid=2-s2.0-85105754215&doi=10.1016%2fj.envpol.2021.117281&partnerID=40&md5=fb2264def79b45e7704a7a9d6d2a2aef	Heavy metals; Marine sediment; Microbial network assemblages; Semi-enclosed bay	English	Article	Final		Scopus	2-s2.0-85105754215
Wu D., Zhao Y., Cheng L., Zhou Z., Wu Q., Wang Q., Yuan Q.	57223281228;57211496983;57118601200;57223300654;57223305077;57189988502;55169428500;	Activity and structure of methanogenic microbial communities in sediments of cascade hydropower reservoirs, Southwest China	2021	Science of the Total Environment	3	10.1016/j.scitotenv.2021.147515	https://www.scopus.com/inward/record.uri?eid=2-s2.0-85105488263&doi=10.1016%2fj.scitotenv.2021.147515&partnerID=40&md5=5a5ced197b9de882cba520320ccebd2a	Archaea; Metagenomic sequencing; Methane production; Reservoirs; Sediment organic carbon	English	Article	Final		Scopus	2-s2.0-85105488263
Smith J.T., Andam C.P.	57217060959;17345331200;	Extensive Horizontal Gene Transfer within and between Species of Coagulase-Negative Staphylococcus	2021	Genome Biology and Evolution	5	10.1093/gbe/evab206	https://www.scopus.com/inward/record.uri?eid=2-s2.0-85117535567&doi=10.1093%2fgbe%2fevab206&partnerID=40&md5=390c007421620cd2ace6469482ab5b80	coagulase-negative; genome; horizontal gene transfer; recombination; Staphylococcus	English	Article	Final	All Open Access, Gold, Green	Scopus	2-s2.0-85117535567
Babich T.L., Semenova E.M., Sokolova D.S., Tourova T.P., Bidzhieva S.K., Loiko N.G., Avdonin G.I., Lutsenko N.I., Nazina T.N.	8538220000;57214910623;6602552612;6701637195;25947284600;7006188688;6508222733;57509759800;6603798988;	Phylogenetic Diversity and Potential Activity of Bacteria and Fungi in the Deep Subsurface Horizons of an Uranium Deposit	2021	Microbiology (Russian Federation)	2	10.1134/S0026261721040032	https://www.scopus.com/inward/record.uri?eid=2-s2.0-85116333840&doi=10.1134%2fS0026261721040032&partnerID=40&md5=4c9fdd54d31e07402b9fdc6a9537f5c1	16S rRNA gene; bacteria; deep subsurface horizons; functional diversity; fungi; high-throughput sequencing; ITS; iVikodak; uranium deposit	English	Article	Final		Scopus	2-s2.0-85116333840
Hidalgo K.J., Sierra-Garcia I.N., Zafra G., de Oliveira V.M.	57210707090;56070997300;14628083100;35611272000;	Genome-resolved meta-analysis of the microbiome in oil reservoirs worldwide	2021	Microorganisms	1	10.3390/microorganisms9091812	https://www.scopus.com/inward/record.uri?eid=2-s2.0-85113582589&doi=10.3390%2fmicroorganisms9091812&partnerID=40&md5=46561f55526371e6531c3c6d1d9e388a	Core microbiota; Functional potential; Metagenomics; Oil fields; Petroleum	English	Article	Final	All Open Access, Gold, Green	Scopus	2-s2.0-85113582589
Wu H., Bertilsson S., Zhang W., Li Y., Hui C., Wang H., Li J., Niu L.	57193554541;6603932886;55063813600;55881885600;57211924549;57208342951;57190841793;55928980500;	Integrating experiments with system-level biogeochemical modeling to understand nitrogen cycling of reservoir sediments at elevated hydrostatic pressure	2021	Environmental Research	3	10.1016/j.envres.2021.111671	https://www.scopus.com/inward/record.uri?eid=2-s2.0-85111055398&doi=10.1016%2fj.envres.2021.111671&partnerID=40&md5=075565ac85ddfe07ac8262ec7993454b	Bacterial communities; Biogeochemical model; Denitrification; Hydrostatic pressure; Nitrogen; Reservoir sediment	English	Article	Final		Scopus	2-s2.0-85111055398
Sunday K., Brennan F.	57188712036;7102156948;	A review of offshore wind monopiles structural design achievements and challenges	2021	Ocean Engineering	15	10.1016/j.oceaneng.2021.109409	https://www.scopus.com/inward/record.uri?eid=2-s2.0-85109450622&doi=10.1016%2fj.oceaneng.2021.109409&partnerID=40&md5=63b00045886566863c17b91efe57c252	Corrosion; Damping; Monopile; Offshore wind; Soil-structure interaction; Transition piece	English	Article	Final	All Open Access, Green	Scopus	2-s2.0-85109450622
Garlapati D., Kumar B.C., Muthukumar C., Madeswaran P., Ramu K., Murthy M.V.R.	55596759200;56195817100;57224483780;35237659600;9245241600;36981070800;	Assessing the in situ bacterial diversity and composition at anthropogenically active sites using the environmental DNA (eDNA)	2021	Marine Pollution Bulletin	3	10.1016/j.marpolbul.2021.112593	https://www.scopus.com/inward/record.uri?eid=2-s2.0-85107621700&doi=10.1016%2fj.marpolbul.2021.112593&partnerID=40&md5=637aa2e63be4f2e7b00045038ceb40e9	Bacteria; eDNA; High-throughput sequencing; Metagenomics; Sediment and seawater; V3, V4; Vibrio	English	Article	Final		Scopus	2-s2.0-85107621700
Robinson M.T.A., Wang Z.	57072323700;56627117600;	The effect of the TMD on the vibration of an offshore wind turbine considering three soil-pile-interaction models	2021	Advances in Structural Engineering	1	10.1177/13694332211008316	https://www.scopus.com/inward/record.uri?eid=2-s2.0-85104486080&doi=10.1177%2f13694332211008316&partnerID=40&md5=fdd454a2a1a278724e5fbf44ec1a5066	Monopile; Newmark-Beta algorithm; offshore wind turbine; power series method; tuned mass damper	English	Article	Final		Scopus	2-s2.0-85104486080
Bian K., Wang C., Jia S., Shi P., Zhang H., Ye L., Zhou Q., Li A.	57215937442;57225121012;55388402800;53264777400;57204882223;55166482200;56454597500;24577638500;	Spatial dynamics of bacterial community in chlorinated drinking water distribution systems supplied with two treatment plants: An integral study of free-living and particle-associated bacteria	2021	Environment International	5	10.1016/j.envint.2021.106552	https://www.scopus.com/inward/record.uri?eid=2-s2.0-85104102655&doi=10.1016%2fj.envint.2021.106552&partnerID=40&md5=4eb755292a174fdef6d8b25bb964e84c	Bacterial community; Drinking water distribution system; High-throughput sequencing; Intersection region; Spatial dynamics	English	Article	Final	All Open Access, Gold	Scopus	2-s2.0-85104102655
Yao C., Meng X., Qu X., Zhan G., Li L., Lei G.	55842415600;57252882000;57252760100;57218363738;57259599700;8609490200;	Reaction kinetics model and numerical simulation method of microbial flooding in oil reservoirs [油藏微生物驱反应动力学模型及数值模拟方法]	2021	Zhongguo Shiyou Daxue Xuebao (Ziran Kexue Ban)/Journal of China University of Petroleum (Edition of Natural Science)		10.3969/j.issn.1673-5005.2021.04.010	https://www.scopus.com/inward/record.uri?eid=2-s2.0-85114650508&doi=10.3969%2fj.issn.1673-5005.2021.04.010&partnerID=40&md5=034840b7579a8796a909d5d477b71133	Enhanced oil recovery; Microbial flooding; Numerical simulation; Reaction kinetic model; Sensitivity analysis	Chinese	Article	Final		Scopus	2-s2.0-85114650508
Zhao J., Li L., Wan Y., Li Z., Luo N., Mu H., Li W., Zhang Y.	36769992900;57205201315;8638301900;57213157472;57253258400;57211441803;57826948400;55428920000;	Interaction between in-situ oil reservoir microorganisms and minerals [油藏原位微生物与储层矿物的相互作用]	2021	Zhongguo Shiyou Daxue Xuebao (Ziran Kexue Ban)/Journal of China University of Petroleum (Edition of Natural Science)		10.3969/j.issn.1673-5005.2021.04.015	https://www.scopus.com/inward/record.uri?eid=2-s2.0-85114645073&doi=10.3969%2fj.issn.1673-5005.2021.04.015&partnerID=40&md5=dd61e61479ff02329039cce402ee8aa0	Bacillus sp.; Calcite; Dolomite; Mica; Microorganisms; Minerals; Size effect	Chinese	Article	Final		Scopus	2-s2.0-85114645073
Zhao J.-Y., Hu B., Dolfing J., Li Y., Tang Y.-Q., Jiang Y., Chi C.-Q., Xing J., Nie Y., Wu X.-L.	35785492300;57199663548;7004307624;56835836300;8956229300;56969939600;16642194600;7202559170;56526086500;55714869100;	Thermodynamically favorable reactions shape the archaeal community affecting bacterial community assembly in oil reservoirs	2021	Science of the Total Environment	9	10.1016/j.scitotenv.2021.146506	https://www.scopus.com/inward/record.uri?eid=2-s2.0-85103378347&doi=10.1016%2fj.scitotenv.2021.146506&partnerID=40&md5=da849e42b7148227f1f60376a767be85	Core archaea; Microbial community assembly; Microbiome; Oil reservoirs; Thermodynamic constraint	English	Article	Final	All Open Access, Hybrid Gold, Green	Scopus	2-s2.0-85103378347
Novikov D.А., Chernykh А.V., Konstantinova L.N., Dultsev F.F., Yurchik I.I.	35318389700;7005156647;56122511500;57198442950;57212003989;	Vendian hydrogeochemistry of the siberian platform	2021	Russian Geology and Geophysics		10.2113/RGG20194074	https://www.scopus.com/inward/record.uri?eid=2-s2.0-85115388461&doi=10.2113%2fRGG20194074&partnerID=40&md5=841a01071337eb8bbd7f3201166d7e68	Cambrian; Degree of metamorphism; Extrastrong brines; Genetic type; Hydrogeochemistry; Siberian Platform; Trap magmatism; Vendian	English	Article	Final		Scopus	2-s2.0-85115388461
Faria M.J., Lopes C.M., Das Neves J., Lúcio M.	57211280368;26649517700;57208073193;24070869000;	Lipid nanocarriers for anti-HIV therapeutics: A focus on physicochemical properties and biotechnological advances	2021	Pharmaceutics	7	10.3390/pharmaceutics13081294	https://www.scopus.com/inward/record.uri?eid=2-s2.0-85113441975&doi=10.3390%2fpharmaceutics13081294&partnerID=40&md5=37f3149954acb92b35fefa291bd7daff	ARV delivery; Biological barriers; Biotechnology in ARV; Lipid emulsions; Lipid nanoparticles; Liposomes; RNAi and ARV codelivery	English	Review	Final	All Open Access, Gold, Green	Scopus	2-s2.0-85113441975
Quraishi M., Bhatia S.K., Pandit S., Gupta P.K., Rangarajan V., Lahiri D., Varjani S., Mehariya S., Yang Y.-H.	57219324017;55347197200;15060348700;57220905930;55210395700;57192250734;56641777600;56035147600;9334560800;	Exploiting microbes in the petroleum field: Analyzing the credibility of microbial enhanced oil recovery (MEOR)	2021	Energies	15	10.3390/en14154684	https://www.scopus.com/inward/record.uri?eid=2-s2.0-85112590107&doi=10.3390%2fen14154684&partnerID=40&md5=c962d5abd48e443efd1986f3d3a0c72b	Biosurfactants; Crude oil; Field trials; Microbial enhanced oil recovery (MEOR); Microbial metabolic by-products; Microbial metabolic pathways; Numerical simulation and modelling; Petroleum biotechnology; Reservoir dynamics; Species properties	English	Review	Final	All Open Access, Gold, Green	Scopus	2-s2.0-85112590107
Haslun J.A., Hauff-Salas B., Strychar K.B., Cervino J.M., Ostrom N.E.	53979920600;57203982166;6602269160;19033589800;7003458582;	Variation in immune-related gene expression provides evidence of local adaptation in porites astreoides (Lamarck, 1816) between inshore and offshore meta-populations inhabiting the lower florida reef tract, USA	2021	Water (Switzerland)	1	10.3390/w13152107	https://www.scopus.com/inward/record.uri?eid=2-s2.0-85112031548&doi=10.3390%2fw13152107&partnerID=40&md5=bfc5149979a67dd2a1a9a86d38f66e0f	ACAP3; Coral bleaching; EIF3H; Immunity; Patch reefs; Porites astreoides; TRAF3	English	Article	Final	All Open Access, Gold, Green	Scopus	2-s2.0-85112031548
Kalami R., Pourbabaee A.-A.	57226350454;12778167700;	Investigating the potential of bioremediation in aged oil-polluted hypersaline soils in the south oilfields of Iran	2021	Environmental Monitoring and Assessment	2	10.1007/s10661-021-09304-7	https://www.scopus.com/inward/record.uri?eid=2-s2.0-85111314702&doi=10.1007%2fs10661-021-09304-7&partnerID=40&md5=d344cce814913c8eaa78ff01b0c0e643	Bacterial diversity; Bioremediation traits; Extreme soils; Oil pollution	English	Article	Final		Scopus	2-s2.0-85111314702
Chukwuma K., Tsikos H., Wagner N.	57201402954;6603390435;8708692900;	Control of variability of primary grain assemblages on the stratigraphic differences in diagenetic processes and products in organic-rich sediments	2021	Sedimentary Geology	3	10.1016/j.sedgeo.2021.105966	https://www.scopus.com/inward/record.uri?eid=2-s2.0-85111266030&doi=10.1016%2fj.sedgeo.2021.105966&partnerID=40&md5=2dba3536eb85bf22883e63b55143f95f	Bacterial sulfate reduction; Biogenic silica; Karoo Basin; Organic oxidation reaction; Primary grain assemblage; Shale diagenesis	English	Article	Final		Scopus	2-s2.0-85111266030
Albahri M.B., Barifcani A., Iglauer S., Lebedev M., O’Neil C., Salgar-Chaparro S.J., Machuca L.L.	57211713375;36545019600;7801631384;7102152042;57223296494;57090962300;43861654600;	Investigating the mechanism of microbiologically influenced corrosion of carbon steel using X-ray micro-computed tomography	2021	Journal of Materials Science	3	10.1007/s10853-021-06112-9	https://www.scopus.com/inward/record.uri?eid=2-s2.0-85105481294&doi=10.1007%2fs10853-021-06112-9&partnerID=40&md5=69503fa331e9014fad3f30e74bf5ced7		English	Article	Final		Scopus	2-s2.0-85105481294
Zhao Z., Zhao Z.	57195808486;57217189236;	Sulphate supergene minerals: An intuitive indicator for deep deposit in plateau regions	2021	Geological Journal		10.1002/gj.4143	https://www.scopus.com/inward/record.uri?eid=2-s2.0-85104856623&doi=10.1002%2fgj.4143&partnerID=40&md5=3a0625064158aea1bd7a30f8f946d513	environment significance; resource significance; Rongna Cu–Au deposit; sulphate minerals	English	Article	Final		Scopus	2-s2.0-85104856623
Amarasiri M., Vo Y., Gardiner M.G., Poh P., Soo P., Pavy M., Hein N., Ferreira R., Hannan K.M., Hannan R.D., Banwell M.G.	57210429681;55916256200;7006521789;57216275280;57217609334;36011970300;23984505600;57199948926;6701806258;7006328373;7005590641;	The Synthesis and Biological Evaluation of Some C-9 and C-10 Substituted Derivatives of the RNA Polymerase i Transcription Inhibitor CX-5461	2021	Australian Journal of Chemistry		10.1071/CH21049	https://www.scopus.com/inward/record.uri?eid=2-s2.0-85104371257&doi=10.1071%2fCH21049&partnerID=40&md5=7fc9124734617c0dfe22fa0776a231cc	alkyne; azide; biotin; cancer; click chemistry; fluorescent; ribosomal RNA; RNA Polymerase 1 inhibitor; synthesis; tagging	English	Article	Final		Scopus	2-s2.0-85104371257
Mahmoud S.S., Maddock S., Adal A.M.	7202300427;57226552264;56462863900;	Isoprenoid Metabolism and Engineering in Glandular Trichomes of Lamiaceae	2021	Frontiers in Plant Science	4	10.3389/fpls.2021.699157	https://www.scopus.com/inward/record.uri?eid=2-s2.0-85111939055&doi=10.3389%2ffpls.2021.699157&partnerID=40&md5=482452e542f5cec810d3661b695c2025	glandular trichomes; isoprenoids; lavender; metabolic engineering; mint	English	Review	Final	All Open Access, Gold, Green	Scopus	2-s2.0-85111939055
Shuai Y., Xie H., Zhang S., Zhang Y., Eiler J.M.	9743683500;57201391430;8963298700;57223356553;7003352180;	Recognizing the pathways of microbial methanogenesis through methane isotopologues in the subsurface biosphere	2021	Earth and Planetary Science Letters	3	10.1016/j.epsl.2021.116960	https://www.scopus.com/inward/record.uri?eid=2-s2.0-85105693088&doi=10.1016%2fj.epsl.2021.116960&partnerID=40&md5=5c3a21f57b9deb4669711e43e7103fe2	biogenic methane; clumped isotopologue; hydrogenotrophic methanogenesis; metabolism pathway; Δ13CH3D proxy	English	Article	Final		Scopus	2-s2.0-85105693088
Wang C., Masoudi A., Wang M., Yang J., Yu Z., Liu J.	57217293600;57197867787;57216411354;57218299846;15521604500;12789725700;	Land-use types shape soil microbial compositions under rapid urbanization in the Xiong'an New Area, China	2021	Science of the Total Environment	9	10.1016/j.scitotenv.2021.145976	https://www.scopus.com/inward/record.uri?eid=2-s2.0-85101896942&doi=10.1016%2fj.scitotenv.2021.145976&partnerID=40&md5=d3aebed5a099a94896b1f80a88ca3fa3	High-throughput sequencing; Land-use type; Soil microbiome; Xiong'an New Area	English	Article	Final		Scopus	2-s2.0-85101896942
Pannekens M., Voskuhl L., Mohammadian S., Köster D., Meier A., Köhne J.M., Kulbatzki M., Akbari A., Haque S., Meckenstock R.U.	57204874465;57216912303;56179169800;57200937070;57216912574;6701710622;57226066029;35955695900;14035388800;7005916698;	Microbial Degradation Rates of Natural Bitumen	2021	Environmental Science and Technology	2	10.1021/acs.est.1c00596	https://www.scopus.com/inward/record.uri?eid=2-s2.0-85110275966&doi=10.1021%2facs.est.1c00596&partnerID=40&md5=3d696fd4f5c8fadeff1768848f30ec08	anaerobic biodegradation; asphalt; biofilm formation; isotope dilution; micro habitats; oil reservoirs; petroleum mineralization; water droplets	English	Article	Final	All Open Access, Green	Scopus	2-s2.0-85110275966
Guo X., Zhu L., Zhong H., Li P., Zhang C., Wei D.	57189867636;57222090512;57207050610;57193538857;55703917700;55647193300;	Response of antibiotic and heavy metal resistance genes to tetracyclines and copper in substrate-free hydroponic microcosms with Myriophyllum aquaticum	2021	Journal of Hazardous Materials	22	10.1016/j.jhazmat.2021.125444	https://www.scopus.com/inward/record.uri?eid=2-s2.0-85101325850&doi=10.1016%2fj.jhazmat.2021.125444&partnerID=40&md5=ba7536a01c774f8c3bc051c13208af74	Antibiotic resistance genes; Constructed wetland; Functional prediction; Phytoremediation; Submerged macrophyte	English	Article	Final		Scopus	2-s2.0-85101325850
Stejskal V., Vendl T., Aulicky R., Athanassiou C.	7004851035;55561306100;6506502565;7003773692;	Synthetic and natural insecticides: Gas, liquid, gel and solid formulations for stored‐product and food‐industry pest control	2021	Insects	33	10.3390/insects12070590	https://www.scopus.com/inward/record.uri?eid=2-s2.0-85109355500&doi=10.3390%2finsects12070590&partnerID=40&md5=e86321fcb9e14c30b85a64322e0a668c	Aerosol; Baits; Di-atomaceous earth; Essential oils; Fumigation; Impregnated nets; Insecticides; IPM; Nanoparticles; Spray	English	Review	Final	All Open Access, Gold, Green	Scopus	2-s2.0-85109355500
WU T., FENG S.-Y., YANG Q.-H., BHETARIYA P.J., GONG K., CUI C.-L., SONG J., PING X.-R., PEI Q.-Y., YU T., SONG X.-M.	57199057417;57201974627;57201977278;37460894100;57215481578;57214750484;57221101931;57224167734;57214751270;57214758602;55764008900;	Integration of the metabolome and transcriptome reveals the metabolites and genes related to nutritional and medicinal value in Coriandrum sativum	2021	Journal of Integrative Agriculture	8	10.1016/S2095-3119(20)63358-5	https://www.scopus.com/inward/record.uri?eid=2-s2.0-85107154058&doi=10.1016%2fS2095-3119%2820%2963358-5&partnerID=40&md5=1c607f802866c86cbad8f01d74fec6be	Coriander; metabolomics; phenolic compounds; regulatory network; transcriptome	English	Article	Final	All Open Access, Gold, Green	Scopus	2-s2.0-85107154058
Bansal S., Sardar S., Sinha K., Bhunia R.K., Katoch M., Sonah H., Deshmukh R., Ram H.	57222813951;57222068192;57206239779;56324327900;56559963400;35726327500;35765186600;25930579000;	Identification and molecular characterization of rice bran-specific lipases	2021	Plant Cell Reports	3	10.1007/s00299-021-02714-4	https://www.scopus.com/inward/record.uri?eid=2-s2.0-85106451796&doi=10.1007%2fs00299-021-02714-4&partnerID=40&md5=c4950e5beb673bc53e48067896f8c548	Bran; Gene expression; Lipases; q-PCR; Rice; Seed	English	Article	Final		Scopus	2-s2.0-85106451796
Gomes S.C., Fachin S., da Fonseca J.G., Angst P.D.M., Lamers M.L., da Silva I.S.B., Nunes L.N.	7101662630;57223330001;57223327141;37050573500;23667943300;6507423347;21834883400;	Dental biofilm of symptomatic COVID-19 patients harbours SARS-CoV-2	2021	Journal of Clinical Periodontology	18	10.1111/jcpe.13471	https://www.scopus.com/inward/record.uri?eid=2-s2.0-85105571344&doi=10.1111%2fjcpe.13471&partnerID=40&md5=79746c0ee2b889b4be96d9ea78c46e81	COVID-19; dental plaque; observational study; pandemics; SARS-CoV-2	English	Article	Final	All Open Access, Green	Scopus	2-s2.0-85105571344
Labella A., Molero R., Leiva-Rebollo R., Pérez-Recuerda R., Borrego J.J.	19639016200;57222048491;57205370330;6505560718;7103195132;	Identification, resistance to antibiotics and biofilm formation of bacterial strains isolated from a reverse osmosis system of a drinking water treatment plant	2021	Science of the Total Environment	9	10.1016/j.scitotenv.2021.145718	https://www.scopus.com/inward/record.uri?eid=2-s2.0-85101067040&doi=10.1016%2fj.scitotenv.2021.145718&partnerID=40&md5=6209de1e01e7197331bfc25bc671e368	Antibiotic resistance; Bacterial identification; Biofilm formation; Drinking water purification; Reverse osmosis	English	Article	Final		Scopus	2-s2.0-85101067040
Sharma K., Mudgal A., Khan B., Kaushik R., Sharma G.	57199714690;57271409100;57271127700;8777896100;57653136600;	Pharmacological virtue of punica granatum	2021	Punica granatum: Cultivation, Properties and Health Benefits			https://www.scopus.com/inward/record.uri?eid=2-s2.0-85115684388&partnerID=40&md5=ac919cfdd00df9b9148c87a74a7c5085	Cardiovascular disorders; Chemoprotective action; Metabolic diseases; Periodontal diseases; Punica granatum	English	Book Chapter	Final		Scopus	2-s2.0-85115684388
Artasensi A., Mazzotta S., Fumagalli L.	57204212785;57208648244;8061867300;	Back to basics: Choosing the appropriate surface disinfectant	2021	Antibiotics	4	10.3390/antibiotics10060613	https://www.scopus.com/inward/record.uri?eid=2-s2.0-85107174612&doi=10.3390%2fantibiotics10060613&partnerID=40&md5=a7d083342b6a0b9aff019e0d90a95288	Antimicrobial; Disinfectant; Fomite; Microorganisms; Surface contamination; Surface disinfection	English	Review	Final	All Open Access, Gold, Green	Scopus	2-s2.0-85107174612
Yamada K., Masuda K., Ida S., Tada H., Bando M., Abe K., Tatematsu K.-I., Sezutsu H., Oyama T., Chikamatsu K., Takeda S.	57223857970;57223863444;56976019600;57205104571;57223850965;57223873936;35873398300;14919672700;35432985900;6603841687;7403066767;	In vitro assessment of antitumor immune responses using tumor antigen proteins produced by transgenic silkworms	2021	Journal of Materials Science: Materials in Medicine	2	10.1007/s10856-021-06526-6	https://www.scopus.com/inward/record.uri?eid=2-s2.0-85106208194&doi=10.1007%2fs10856-021-06526-6&partnerID=40&md5=da0a7464fda0ee918d7c907ffcf267d9		English	Article	Final	All Open Access, Gold, Green	Scopus	2-s2.0-85106208194
Camacho-Montealegre C.M., Rodrigues E.M., Morais D.K., Tótola M.R.	57206191370;56549532300;55901139400;8663984300;	Prokaryotic community diversity during bioremediation of crude oil contaminated oilfield soil: effects of hydrocarbon concentration and salinity	2021	Brazilian Journal of Microbiology	3	10.1007/s42770-021-00476-5	https://www.scopus.com/inward/record.uri?eid=2-s2.0-85103672109&doi=10.1007%2fs42770-021-00476-5&partnerID=40&md5=9b1b4e8e8d3f3011eeebbc58f698d480	Biodegradation; Community structure; Hydrocarbon mineralization; Hydrocarbonoclastic prokaryotes; Microbial ecology	English	Article	Final	All Open Access, Green	Scopus	2-s2.0-85103672109
Prajapat G., Jain S., Rellegadla S., Tailor P., Agrawal A.	57194216129;57194284773;56487927000;57222084278;42860991800;	Synergistic approach to control reservoir souring in the moderately thermophilic oil fields of western India	2021	Bioresource Technology Reports	4	10.1016/j.biteb.2021.100649	https://www.scopus.com/inward/record.uri?eid=2-s2.0-85101384275&doi=10.1016%2fj.biteb.2021.100649&partnerID=40&md5=615333ca656834393ab691f47f14ba15	Biocides; Nitrate reducing bacteria; Oil reservoir; Souring; Sulfate reducing bacteria	English	Article	Final		Scopus	2-s2.0-85101384275
Mafiana M.O., Kang X.-H., Leng Y., He L.-F., Li S.-W.	57219906299;57202393675;55774512000;57220804275;16549994800;	Petroleum contamination significantly changes soil microbial communities in three oilfield locations in Delta State, Nigeria	2021	Environmental Science and Pollution Research	10	10.1007/s11356-021-12955-1	https://www.scopus.com/inward/record.uri?eid=2-s2.0-85101206151&doi=10.1007%2fs11356-021-12955-1&partnerID=40&md5=1aa98f2e23c13fc477c0a227765aef3e	Bioremediation; Microbial characterization; Oil-contaminated soil; Species richness and diversity	English	Article	Final		Scopus	2-s2.0-85101206151
Pan L., Cai C., Liu C., Liu D., Li G., Linhardt R.J., Yu G.	57202118490;56406844900;57147654000;57223301747;57211737944;35461639700;57211738067;	Recent progress and advanced technology in carbohydrate-based drug development	2021	Current Opinion in Biotechnology	15	10.1016/j.copbio.2020.12.023	https://www.scopus.com/inward/record.uri?eid=2-s2.0-85099980671&doi=10.1016%2fj.copbio.2020.12.023&partnerID=40&md5=7cdb87c2606cd35f237b7faf61e1659b		English	Review	Final		Scopus	2-s2.0-85099980671
Scales B.S., Cable R.N., Duhaime M.B., Gerdts G., Fischer F., Fischer D., Mothes S., Hintzki L., Moldaenke L., Ruwe M., Kalinowski J., Kreikemeyer B., Pedrotti M.-L., Gorsky G., Elineau A., Labrenz M., Oberbeckmann S.	55522351800;35101565500;24073064000;6602157966;57209500187;14041614900;57195467262;57226518907;57226518008;57195427182;7101959761;35517765100;56005007500;57226518326;55351530900;6602148601;36669095700;	Cross-Hemisphere Study Reveals Geographically Ubiquitous, Plastic-Specific Bacteria Emerging from the Rare and Unexplored Biosphere	2021	mSphere	10	10.1128/mSphere.00851-20	https://www.scopus.com/inward/record.uri?eid=2-s2.0-85111789397&doi=10.1128%2fmSphere.00851-20&partnerID=40&md5=b537a0f578b89c2d921adc1d709f179f	Bacterial communities; Biofilms; Marine microbiology; Microbiome; Microplastics; Rhodobacteraceae	English	Article	Final	All Open Access, Gold, Green	Scopus	2-s2.0-85111789397
D’Ugo E., Bruno M., Mukherjee A., Chattopadhyay D., Giuseppetti R., De Pace R., Magurano F.	6602664377;7202870287;57209049593;57203196019;6603492990;55372460800;23389581300;	Characterization of microbial response to petroleum hydrocarbon contamination in a lacustrine ecosystem	2021	Environmental Science and Pollution Research	6	10.1007/s11356-021-13885-8	https://www.scopus.com/inward/record.uri?eid=2-s2.0-85106668014&doi=10.1007%2fs11356-021-13885-8&partnerID=40&md5=61520443687dfc7e8a026a9bc2e24819	Aromatic hydrocarbon degradation; Bioinformatics; Freshwater ecosystem; Lake microbiome; Lake Pertusillo; Metabolic reconstruction; Metagenomics; Oil spill; Petroleum hydrocarbon; Sustainable use of waters	English	Article	Final	All Open Access, Hybrid Gold, Green	Scopus	2-s2.0-85106668014
Nischitha R., Shivanna M.B.	57216993911;7801557128;	Metabolite fingerprinting, in vitro antimicrobial and antioxidant activities and in-silico docking in Alloteropsis cimicina and its endophytic fungus Penicillium pinophilum	2021	Molecular Biology Reports	3	10.1007/s11033-021-06410-0	https://www.scopus.com/inward/record.uri?eid=2-s2.0-85106450924&doi=10.1007%2fs11033-021-06410-0&partnerID=40&md5=a03a864269c28d0eb7d898dad94fc05e	Cyclic voltammetry; Drug likeness prediction; Mass spectroscopy; Molecular docking; Radical scavenging assays; Well diffusion assay	English	Article	Final		Scopus	2-s2.0-85106450924
de Sousa Pires A., Dias G.M., Chagas de Oliveira Mariano D., Akamine R.N., Cruz de Albuquerque A.C., Groposo C., Soares Ribeiro C.M., de Figueiredo Vilela L., Neves B.C.	57207252990;37055379700;57223015233;57201426717;57223006089;8650918800;57223005342;57216613736;7007056906;	Molecular diversity and abundance of the microbial community associated to an offshore oil field on the southeast of Brazil	2021	International Biodeterioration and Biodegradation	7	10.1016/j.ibiod.2021.105215	https://www.scopus.com/inward/record.uri?eid=2-s2.0-85104455305&doi=10.1016%2fj.ibiod.2021.105215&partnerID=40&md5=43a6b7fc21253024ea1d9905cb204cca	16S rRNA gene; Campos basin; Desulfobacterota; DPANN superphylum Archaea; Sulfate-reducing microorganisms	English	Article	Final		Scopus	2-s2.0-85104455305
Kochunni S.K., Chowdhury K.	57156669000;55162426700;	Effect of precooling with transcritical CO2 cycle on two types of LNG boil-off gas reliquefaction systems	2021	Journal of Natural Gas Science and Engineering	4	10.1016/j.jngse.2021.103876	https://www.scopus.com/inward/record.uri?eid=2-s2.0-85102391353&doi=10.1016%2fj.jngse.2021.103876&partnerID=40&md5=a9290fee703453e4435e944a053d46b0	Boil-off gas reliquefaction; Claude cycle; Exergy; Precooling; Reverse brayton cycle; Transcritical CO2 cycle	English	Article	Final		Scopus	2-s2.0-85102391353
Torelli M., Kowalewski I., Gervais V., Wendebourg J., Dupré S., Wolf S., Gout C., Deville E.	57217046608;6505955987;13407833100;6507117368;56218639400;48961500700;35731217200;6603342680;	Quantification of natural microbial methane from generation to emission in the offshore Aquitaine: A basin modelling approach	2021	Marine and Petroleum Geology	2	10.1016/j.marpetgeo.2021.104949	https://www.scopus.com/inward/record.uri?eid=2-s2.0-85101135435&doi=10.1016%2fj.marpetgeo.2021.104949&partnerID=40&md5=1e4f04bfc41d4ed70640a96a97cbd77b	Anaerobic oxidation of methane (AOM); Aquitaine shelf; Basin modelling; Biogenic methane; Methane-derived authigenic carbonates (MDAC); Sedimentary organic matter (SOM); Sensitivity analysis	English	Article	Final	All Open Access, Bronze, Green	Scopus	2-s2.0-85101135435
Birk S.E., Mazzoni C., Mobasharah Javed M., Borre Hansen M., Krogh Johansen H., Anders Juul Haagensen J., Molin S., Hagner Nielsen L., Boisen A.	57216545228;56770977600;57222270980;55432321000;6507341698;57222268784;57197278680;57216911884;7004114136;	Co-delivery of ciprofloxacin and colistin using microcontainers for bacterial biofilm treatment	2021	International Journal of Pharmaceutics	3	10.1016/j.ijpharm.2021.120420	https://www.scopus.com/inward/record.uri?eid=2-s2.0-85102129281&doi=10.1016%2fj.ijpharm.2021.120420&partnerID=40&md5=a30f9ff9dd0ea9a3212b0d0ba74650e9		English	Article	Final	All Open Access, Green	Scopus	2-s2.0-85102129281
Kögler F., Dopffel N., Mahler E., Hartmann F.S.F., Schulze-Makuch D., Visser F., Frommherz B., Herold A., Alkan H.	56317088000;57191409518;57190072906;57220835502;7003451292;55735408600;57221286691;56146381300;6603313166;	Influence of surface mineralogy on the activity of Halanaerobium sp. during microbial enhanced oil recovery (MEOR)	2021	Fuel	7	10.1016/j.fuel.2020.119973	https://www.scopus.com/inward/record.uri?eid=2-s2.0-85098717313&doi=10.1016%2fj.fuel.2020.119973&partnerID=40&md5=38b745ce4ee00bb1163f8d51dd4f2b7b	Carbonate dissolution; Dynamic experiment; Halanaerobium; High salinity; Microbial enhanced oil recovery; Reservoir microbiology	English	Article	Final		Scopus	2-s2.0-85098717313
Casar C.P., Kruger B.R., Osburn M.R.	57200640610;57201194372;36572358600;	Rock-Hosted Subsurface Biofilms: Mineral Selectivity Drives Hotspots for Intraterrestrial Life	2021	Frontiers in Microbiology	11	10.3389/fmicb.2021.658988	https://www.scopus.com/inward/record.uri?eid=2-s2.0-85104610602&doi=10.3389%2ffmicb.2021.658988&partnerID=40&md5=51dd4305f0cabb5c2a7f4dead14de4ba	biofilm; biomass; continental subsurface; deep subsurface; mineral selectivity	English	Article	Final	All Open Access, Gold, Green	Scopus	2-s2.0-85104610602
Hou N., Wang Q., Sun Y., Li X., Song Q., Jiang X., Li B., Zhao X., Zang H., Li D., Li C.	57206436052;57043623300;57203093946;57217870944;57217873115;7404627770;57220864909;55911543600;44361725800;57226876829;36480355800;	A novel biodemulsifier of Bacillus mojavensis XH1 – Oxalate decarboxylase with the potential for demulsification of oilfield emulsion	2021	Journal of Hazardous Materials	18	10.1016/j.jhazmat.2020.124737	https://www.scopus.com/inward/record.uri?eid=2-s2.0-85097787489&doi=10.1016%2fj.jhazmat.2020.124737&partnerID=40&md5=ad5b9a5b75bea65748244db83ebc5f83	Bacillus mojavensis; Biodemulsifiers; Demulsifying genes; Hydrophobic amino acids; Oxalate decarboxylase	English	Article	Final		Scopus	2-s2.0-85097787489
Sharma A., Yazdani S.S.	57212538893;7006610710;	Microbial engineering to produce fatty alcohols and alkanes	2021	Journal of Industrial Microbiology and Biotechnology	5	10.1093/jimb/kuab011	https://www.scopus.com/inward/record.uri?eid=2-s2.0-85105894425&doi=10.1093%2fjimb%2fkuab011&partnerID=40&md5=e399fab05dc53eee0ef3919ab0355d82	Alkane; Fatty alcohol; Microbial engineering; Microbial production	English	Review	Final	All Open Access, Gold, Green	Scopus	2-s2.0-85105894425
Alhefeiti M.A., Athamneh K., Vijayan R., Ashraf S.S.	57222955487;56780358100;24512369600;8707159000;	Bioremediation of various aromatic and emerging pollutants by Bacillus cereus sp. isolated from petroleum sludge	2021	Water Science and Technology	5	10.2166/wst.2021.065	https://www.scopus.com/inward/record.uri?eid=2-s2.0-85104214031&doi=10.2166%2fwst.2021.065&partnerID=40&md5=266f6698f323fa9d5c9780c4cb1dc132	Aromatic dyes; Bacillus cereus; Bioremediation; Emerging pollutants; Pseudomonas guariconensis	English	Article	Final	All Open Access, Gold	Scopus	2-s2.0-85104214031
Kurth J.M., Müller M.-C., Welte C.U., Wagner T.	56924968700;57210788822;26424142700;45161835500;	Structural insights into the methane-generating enzyme from a methoxydotrophic methanogen reveal a restrained gallery of post-translational modifications	2021	Microorganisms	4	10.3390/microorganisms9040837	https://www.scopus.com/inward/record.uri?eid=2-s2.0-85104014476&doi=10.3390%2fmicroorganisms9040837&partnerID=40&md5=13e3cc2d21e9160e0d980548e86c24c0	F430-cofactor; Methoxydotrophic methanogenesis; Methyl-coenzyme M reductase; Post-translational modifications; Thermophilic archaeon; X-ray crystallography	English	Article	Final	All Open Access, Gold, Green	Scopus	2-s2.0-85104014476
Rowe S.E., Beam J.E., Conlon B.P.	35223936100;57212316737;56029336400;	Recalcitrant Staphylococcus aureus infections: Obstacles and solutions	2021	Infection and Immunity	7	10.1128/IAI.00694-20	https://www.scopus.com/inward/record.uri?eid=2-s2.0-85103228645&doi=10.1128%2fIAI.00694-20&partnerID=40&md5=a7ae4fe0420546aaaeeee6a1301daead	Antibiotic tolerance; Persisters; Staphylococcus aureus	English	Article	Final	All Open Access, Green	Scopus	2-s2.0-85103228645
Li F.-L., Zhang Y.-X., Zhang Y.-K., Chen W.-F., Li W.-J., Wang L.	57216855021;57216870710;57221921134;57202839526;57203747945;57196333135;	Siccirubricoccus phaeus sp. nov., isolated from oil reservoir water and emended description of the genus Siccirubricoccus	2021	Antonie van Leeuwenhoek, International Journal of General and Molecular Microbiology	3	10.1007/s10482-021-01516-8	https://www.scopus.com/inward/record.uri?eid=2-s2.0-85100599379&doi=10.1007%2fs10482-021-01516-8&partnerID=40&md5=c2561000d3241db2a3574f6eb8b21d82	Nitrogen-limiting condition; Oil reservoir water; Siccirubricoccus phaeus sp. nov	English	Article	Final		Scopus	2-s2.0-85100599379
Hoefemann M., Döring A., Fichtner N.D., Kreis R.	57210451008;57193846649;55999407000;7004885824;	Combining chemical exchange saturation transfer and 1H magnetic resonance spectroscopy for simultaneous determination of metabolite concentrations and effects of magnetization exchange	2021	Magnetic Resonance in Medicine	6	10.1002/mrm.28574	https://www.scopus.com/inward/record.uri?eid=2-s2.0-85096779201&doi=10.1002%2fmrm.28574&partnerID=40&md5=265c350f62ad5aab82d9f40f2eb6d49a	chemical exchange; macromolecules; magnetization transfer; metabolites; modeling; saturation	English	Article	Final	All Open Access, Hybrid Gold, Green	Scopus	2-s2.0-85096779201
Jurelevicius D., Ramos L., Abreu F., Lins U., de Sousa M.P., dos Santos V.V.C.M., Penna M., Seldin L.	23100487900;57220167095;6701742697;6701851869;56012324700;57220160905;24448599400;13605426000;	Long-term souring treatment using nitrate and biocides in high-temperature oil reservoirs	2021	Fuel	10	10.1016/j.fuel.2020.119731	https://www.scopus.com/inward/record.uri?eid=2-s2.0-85097084147&doi=10.1016%2fj.fuel.2020.119731&partnerID=40&md5=2af0eafced8b34dca66ebbb7a14f493d	Biocide; Nitrate; Secondary oil recovery; Sulfate-reducing bacteria; Sulfide production; Water injection	English	Article	Final		Scopus	2-s2.0-85097084147
Liu L., Sun F., Zhao H., Mi H., He S., Chen Y., Liu Y., Lan H., Zhang M., Wang Z.	57212122650;57219466353;57211586867;57219466210;57219466680;55807438100;57857466500;57219902793;57212669812;55998831200;	Compositional changes of sedimentary microbes in the Yangtze River Estuary and their roles in the biochemical cycle	2021	Science of the Total Environment	11	10.1016/j.scitotenv.2020.143383	https://www.scopus.com/inward/record.uri?eid=2-s2.0-85096011165&doi=10.1016%2fj.scitotenv.2020.143383&partnerID=40&md5=ba0914b4fe6b810c82acda77d2e5f7c5	Bacterial diversity; Community structure; High-throughput sequencing; Yangze River Estuary	English	Article	Final		Scopus	2-s2.0-85096011165
Rasool F.N., Saavedra M.A., Pamba S., Perold V., Mmochi A.J., Maalim M., Simonsen L., Buur L., Pedersen R.H., Syberg K., Jelsbak L.	57220183944;57220190617;57218529658;57188804898;7801327859;57220176442;7005506864;8896490600;55072867300;23669047800;6505944552;	Isolation and characterization of human pathogenic multidrug resistant bacteria associated with plastic litter collected in Zanzibar	2021	Journal of Hazardous Materials	14	10.1016/j.jhazmat.2020.124591	https://www.scopus.com/inward/record.uri?eid=2-s2.0-85097203396&doi=10.1016%2fj.jhazmat.2020.124591&partnerID=40&md5=6cbd354d3bf3f20272c36e7d8c2b181e	Environmental risk; Human pathogens; Plastic pollution; Plastisphere	English	Article	Final	All Open Access, Green	Scopus	2-s2.0-85097203396
Knobloch S., Philip J., Ferrari S., Benhaïm D., Bertrand M., Poirier I.	56549043400;57221740641;56044142100;6506887905;7202308679;8983703100;	The effect of ultrasonic antifouling control on the growth and microbiota of farmed European sea bass (Dicentrarchus labrax)	2021	Marine Pollution Bulletin	7	10.1016/j.marpolbul.2021.112072	https://www.scopus.com/inward/record.uri?eid=2-s2.0-85100019976&doi=10.1016%2fj.marpolbul.2021.112072&partnerID=40&md5=2ab852eec1e6c3c791d9ee8379413244	Antifouling; Aquaculture; Microbiome; Sea bass; Ultrasound; Vibrio	English	Article	Final	All Open Access, Bronze	Scopus	2-s2.0-85100019976
Mezzina M.P., Manoli M.T., Prieto M.A., Nikel P.I.	56015841300;57189031733;57218626389;11840034200;	Engineering Native and Synthetic Pathways in Pseudomonas putida for the Production of Tailored Polyhydroxyalkanoates	2021	Biotechnology Journal	33	10.1002/biot.202000165	https://www.scopus.com/inward/record.uri?eid=2-s2.0-85096747093&doi=10.1002%2fbiot.202000165&partnerID=40&md5=2a2374fd55d651724b0cf2257d7fbcb1	biopolymer; metabolic engineering; pathway engineering; PHA; Pseudomonas putida; synthetic biology	English	Review	Final	All Open Access, Hybrid Gold, Green	Scopus	2-s2.0-85096747093
Mao G., Liang J., Wang Q., Zhao C., Bai Y., Liu R., Liu H., Qu J.	55322036100;55646639400;57211516287;57201659161;26649334500;55739657300;36067405700;55427866900;	Epilithic biofilm as a reservoir for functional virulence factors in wastewater-dominant rivers after WWTP upgrade	2021	Journal of Environmental Sciences (China)	5	10.1016/j.jes.2020.05.014	https://www.scopus.com/inward/record.uri?eid=2-s2.0-85090222481&doi=10.1016%2fj.jes.2020.05.014&partnerID=40&md5=9843340eea5dbd9bb6bbaf79cb3a0409	Epilithic biofilm; Health risk; Pathogens; Virulence factors; Wastewater treatment plant upgrade	English	Article	Final		Scopus	2-s2.0-85090222481
Gong M., Ma Y., Wang R., Chi Y., Chi Y.	57218365063;57205725383;57221058938;24485401600;15757256900;	Isolation and Identification of Typical Bacterial Strains from Eggshell Surface and Evaluation of Their Spoilage Potential in Liquid Whole Egg [鸡蛋壳表面典型菌株的分离鉴定及其对全蛋液致腐能力分析]	2021	Shipin Kexue/Food Science		10.7506/spkx1002-6630-20191214-159	https://www.scopus.com/inward/record.uri?eid=2-s2.0-85103048557&doi=10.7506%2fspkx1002-6630-20191214-159&partnerID=40&md5=8555fbdf1c849f241f313fd605171ca2	Isolation and identification; Liquid whole egg; Total number of bacterial colonies; Typical strains	Chinese	Article	Final		Scopus	2-s2.0-85103048557
Gimza B.D., Cassat J.E.	57208530217;8737466400;	Mechanisms of Antibiotic Failure During Staphylococcus aureus Osteomyelitis	2021	Frontiers in Immunology	23	10.3389/fimmu.2021.638085	https://www.scopus.com/inward/record.uri?eid=2-s2.0-85101919423&doi=10.3389%2ffimmu.2021.638085&partnerID=40&md5=c2dbdf81cab5da7980a3ca023c1a1c3f	antibiotic failure; antibiotic tolerance; biofilm; intracellular survival; osteomyelitis; persisters; SCVs; Staphylococcus aureus	English	Review	Final	All Open Access, Gold, Green	Scopus	2-s2.0-85101919423
Zhu P., Song Z., Wu X., Xu P., Zhang X., Zhu W.	56942856800;12144293400;55850643800;57220932992;57190028004;11640142300;	Community Distribution of Biofilms along a Vertical Wellbore in a Deep Injection Well during Petroleum Production	2021	Energy and Fuels	2	10.1021/acs.energyfuels.0c02963	https://www.scopus.com/inward/record.uri?eid=2-s2.0-85100350640&doi=10.1021%2facs.energyfuels.0c02963&partnerID=40&md5=359f1ff5ed3d722a71b7dd9d38bbf7be		English	Article	Final		Scopus	2-s2.0-85100350640
Peng F., Cheng S., Zhang R., Li M., Zhou J., Wang D., Zhang Y.	57191276537;57218419838;57217668744;57026528200;57218111818;56378300900;57468237400;	Zn-contained mussel-inspired film on Mg alloy for inhibiting bacterial infection and promoting bone regeneration	2021	Regenerative Biomaterials	16	10.1093/rb/rbaa044	https://www.scopus.com/inward/record.uri?eid=2-s2.0-85119175168&doi=10.1093%2frb%2frbaa044&partnerID=40&md5=74726b499762ab89147bda83f4421920	anti-inflammation; antibacterial; magnesium alloy; osteointegration; polydopamine; zinc	English	Article	Final	All Open Access, Gold, Green	Scopus	2-s2.0-85119175168
Wang S., Zhang D., Jiang C., He H., Cui C., Duan W., Hu S., Wang J., Cai X.	49864746000;56687861200;39861477900;57222037187;57222130320;57213160075;55293834100;56640133800;8593095000;	Strain characterization of streptococcus suis serotypes 28 and 31, which harbor the resistance genes optra and ant(6)-ia	2021	Pathogens	2	10.3390/pathogens10020213	https://www.scopus.com/inward/record.uri?eid=2-s2.0-85101514940&doi=10.3390%2fpathogens10020213&partnerID=40&md5=f8ba09db6e5fc1936e0029c5dc9406a2	Antibiotic resistance; Characterization; Genome; Streptococcus suis serotype 28; Streptococcus suis serotype 31	English	Article	Final	All Open Access, Gold, Green	Scopus	2-s2.0-85101514940
Nagkirti P.D., Engineer A.S., Dhakephalkar P.K.	57201739602;54789639100;6506605166;	Xylanimonas oleitrophica sp. nov., a novel petroleum hydrocarbon degrading bacterium isolated from an Indian oil reservoir	2021	Antonie van Leeuwenhoek, International Journal of General and Molecular Microbiology	1	10.1007/s10482-020-01506-2	https://www.scopus.com/inward/record.uri?eid=2-s2.0-85098982281&doi=10.1007%2fs10482-020-01506-2&partnerID=40&md5=b1802b72cf78711c5282d25464144bc5	Genome sequence; Novel species; Oil-degrading bacterium; Xylanimonas	English	Article	Final		Scopus	2-s2.0-85098982281
Ali A., De Risi R., Sextos A.	57210589333;23026567500;6506967924;	Seismic assessment of wind turbines: How crucial is rotor-nacelle-assembly numerical modeling?	2021	Soil Dynamics and Earthquake Engineering	9	10.1016/j.soildyn.2020.106483	https://www.scopus.com/inward/record.uri?eid=2-s2.0-85098492212&doi=10.1016%2fj.soildyn.2020.106483&partnerID=40&md5=8c28e9f5218f3d72ca9a90cb19bf80a6	Blade deformability; Offshore wind turbines; Renewable energy; Seismic vulnerability; Tower failure zones	English	Article	Final	All Open Access, Green	Scopus	2-s2.0-85098492212
Bedoya K., Niño J., Acero J., Cabarcas F., Alzate J.F.	25951362300;57220421528;7005040144;6508131849;35514157100;	Assessment of the microbial community and biocide resistance profile in production and injection waters from an Andean oil reservoir in Colombia	2021	International Biodeterioration and Biodegradation	3	10.1016/j.ibiod.2020.105137	https://www.scopus.com/inward/record.uri?eid=2-s2.0-85097051157&doi=10.1016%2fj.ibiod.2020.105137&partnerID=40&md5=fae51f0c8985eb1697cc522e1a205c44	16S rDNA; Biocide resistance; Illumina; Metagenomic; Metataxonomic; Oil field microbiota	English	Article	Final		Scopus	2-s2.0-85097051157
Nowrotek M., Jałowiecki L., Płaza G.	56979248300;57090655700;7005785053;	Fluoroquinolone Resistance and Virulence Properties among Wastewater Aeromonas caviae Isolates	2021	Microbial Drug Resistance	3	10.1089/mdr.2019.0287	https://www.scopus.com/inward/record.uri?eid=2-s2.0-85094681730&doi=10.1089%2fmdr.2019.0287&partnerID=40&md5=6c9e4cf11dbe90c5c2cb2db2af300071	Aeromonas caviae; antibiotic and metal resistance; fluoroquinolones; virulence properties; wastewater	English	Article	Final		Scopus	2-s2.0-85094681730
Elumalai P., AlSalhi M.S., Mehariya S., Karthikeyan O.P., Devanesan S., Parthipan P., Rajasekar A.	57193158004;10440259800;56035147600;23004982300;55279721800;57193152696;55928874800;	Bacterial community analysis of biofilm on API 5LX carbon steel in an oil reservoir environment	2021	Bioprocess and Biosystems Engineering	8	10.1007/s00449-020-02447-w	https://www.scopus.com/inward/record.uri?eid=2-s2.0-85091155363&doi=10.1007%2fs00449-020-02447-w&partnerID=40&md5=ece91ce16d41ec0065109183eedb787c	Biocorrosion; Biotic system; MiSeq analysis; Proteobacteria; Weight loss	English	Article	Final		Scopus	2-s2.0-85091155363
Chung H.Y., Kim Y.-T., Kwon J.-G., Im H.H., Ko D., Lee J.-H., Choi S.H.	56949584300;56031078700;57211131752;57216474574;57218543781;54975259000;26427927600;	Molecular interaction between methicillin-resistant Staphylococcus aureus (MRSA) and chicken breast reveals enhancement of pathogenesis and toxicity for food-borne outbreak	2021	Food Microbiology	9	10.1016/j.fm.2020.103602	https://www.scopus.com/inward/record.uri?eid=2-s2.0-85089533219&doi=10.1016%2fj.fm.2020.103602&partnerID=40&md5=dae6b9918de4addc6600e41a3c36d969	Food application; Microbial genomics; MRSA; Staphylococcus aureus; Transcriptomics; Virulence factor	English	Article	Final		Scopus	2-s2.0-85089533219
Popko W., Robertson A., Jonkman J., Wendt F., Thomas P., Müller K., Kretschmer M., Hagen T.R., Galinos C., Le Dreff J.-B., Gilbert P., Auriac B., Oh S., Qvist J., Sørum S.Hø., Suja-Thauvin L., Shin H., Molins C., Trubat P., Bonnet P., Bergua R., Wang K., Fu P., Cai J., Cai Z., Alexandre A., Harries R.	55355419200;7403044186;19934004300;56732685900;57191205333;57191272255;56912028600;52063270600;57191953991;57215529678;57198010845;57204395632;57198898898;56421885100;57200218474;57191196012;7404012326;6701525912;56971453300;57206565880;56578541700;57221120705;57204391434;57204394173;57212092190;57002803500;56912095500;	Validation of Numerical Models of the Offshore Wind Turbine from the Alpha Ventus Wind Farm against Full-Scale Measurements within OC5 Phase III	2021	Journal of Offshore Mechanics and Arctic Engineering	3	10.1115/1.4047378	https://www.scopus.com/inward/record.uri?eid=2-s2.0-85088230762&doi=10.1115%2f1.4047378&partnerID=40&md5=1f71fbe0ec38ec5b873f75caac1b5b3f	computational mechanics and design; design of offshore structures; dynamics of structures; ocean energy technology; structural mechanics and foundation; system integrity assessment	English	Article	Final	All Open Access, Green	Scopus	2-s2.0-85088230762
Devaraj A., González J.F., Eichar B., Thilliez G., Kingsley R.A., Baker S., Allard M.W., Bakaletz L.O., Gunn J.S., Goodman S.D.	25958952600;56237625500;57221227601;55747815300;7005305429;57203188765;7102381156;7006952617;7201609041;35405468900;	Enhanced biofilm and extracellular matrix production by chronic carriage versus acute isolates of Salmonella Typhi	2021	PLoS Pathogens	3	10.1371/journal.ppat.1009209	https://www.scopus.com/inward/record.uri?eid=2-s2.0-85099978967&doi=10.1371%2fjournal.ppat.1009209&partnerID=40&md5=47f10d40beda3757b02178f3e29cc4d6		English	Article	Final	All Open Access, Gold, Green	Scopus	2-s2.0-85099978967
Menendez-Gil P., Toledo-Arana A.	57003742600;56009612600;	Bacterial 3′UTRs: A Useful Resource in Post-transcriptional Regulation	2021	Frontiers in Molecular Biosciences	6	10.3389/fmolb.2020.617633	https://www.scopus.com/inward/record.uri?eid=2-s2.0-85099754446&doi=10.3389%2ffmolb.2020.617633&partnerID=40&md5=eae24f39a800e934d8e9eb96effd48c5	3′UTR; bacteria; gene expression regulation; ncRNAs (non-coding RNAs); post-transcription regulation; regulatory small RNAs (sRNAs); RNA-binding proteins (RBPs)	English	Review	Final	All Open Access, Gold, Green	Scopus	2-s2.0-85099754446
Bhardwaj D.K., Taneja N.K., DP S., Chakotiya A., Patel P., Taneja P., Sachdev D., Gupta S., Sanal M.G.	57219774095;18538297400;57219776511;56960479100;57219775550;22636343400;23019815700;57219780368;13806606300;	Phenotypic and genotypic characterization of biofilm forming, antimicrobial resistant, pathogenic Escherichia coli isolated from Indian dairy and meat products	2021	International Journal of Food Microbiology	23	10.1016/j.ijfoodmicro.2020.108899	https://www.scopus.com/inward/record.uri?eid=2-s2.0-85092078566&doi=10.1016%2fj.ijfoodmicro.2020.108899&partnerID=40&md5=2146d4ec40dfa7be26ab6e3822e00d8c	Antimicrobial resistance (AMR); Biofilms; E. coli; Food safety	English	Article	Final		Scopus	2-s2.0-85092078566
Arya R., Shinde S.	57924599700;57923800400;	Legal protection of microbial biodiversity	2021	Microbial Diversity and Ecology in Hotspots		10.1016/B978-0-323-90148-2.00004-3	https://www.scopus.com/inward/record.uri?eid=2-s2.0-85139609494&doi=10.1016%2fB978-0-323-90148-2.00004-3&partnerID=40&md5=63b0498972f9490fb7e631457e4c8378	Biopiracy; Budapest Treaty; Convention of Biological Diversity; Microbial biodiversity; National Biodiversity Authority; Patent; Protection	English	Book Chapter	Final		Scopus	2-s2.0-85139609494
Roelofsen F., Esselink L., Mende-Gillings S., de Meulder M., Sijm N., Smeijers A.	8834152700;57664887100;57666160800;55604023800;57666160900;56993653700;	Online Evaluation of Text-to-sign Translation by Deaf End Users: Some Methodological Recommendations	2021	Proceedings of the 1st International Workshop on Automatic Translation for Signed and Spoken Languages, AT4SSL 2021	1		https://www.scopus.com/inward/record.uri?eid=2-s2.0-85129349217&partnerID=40&md5=08649cb556cf3f8fb11fc4d5fff2582d		English	Conference Paper	Final		Scopus	2-s2.0-85129349217
Tripathi M., Gaur R.	37068119100;15022395700;	Bioactivity of soil microorganisms for agriculture development	2021	Microbes in Land Use Change Management	3	10.1016/B978-0-12-824448-7.00012-7	https://www.scopus.com/inward/record.uri?eid=2-s2.0-85128061732&doi=10.1016%2fB978-0-12-824448-7.00012-7&partnerID=40&md5=837565fe900f2dc526ae3c1d808f8a96	Biogeochemical cycles; Endophytes; Microbial associates; Rhizosphere; Soil health	English	Book Chapter	Final		Scopus	2-s2.0-85128061732
Naseem S.	57537241600;	PAT-PseAAC: Prediction of acetyl threonine in protein sites with statistical moments and chou's 5 step rule	2021	4th International Conference on Innovative Computing, ICIC 2021		10.1109/ICIC53490.2021.9692968	https://www.scopus.com/inward/record.uri?eid=2-s2.0-85126716287&doi=10.1109%2fICIC53490.2021.9692968&partnerID=40&md5=2d15c7b0a1413a9ff8538b958ace6efa	Acetyl threonine; ANN; CNN; Statistical moments	English	Conference Paper	Final		Scopus	2-s2.0-85126716287
Inbasekaran A., Gnanasekaran R.K., Marciano R.	57468372800;57195283297;6701821288;	Using Transfer Learning to contextually Optimize Optical Character Recognition (OCR) output and perform new Feature Extraction on a digitized cultural and historical dataset	2021	Proceedings - 2021 IEEE International Conference on Big Data, Big Data 2021		10.1109/BigData52589.2021.9671586	https://www.scopus.com/inward/record.uri?eid=2-s2.0-85125347124&doi=10.1109%2fBigData52589.2021.9671586&partnerID=40&md5=9fe82d996f7e4b2186d0599bc392e5cd	BERT; entity recognition; natural language processing; RoBERTa; spelling correction; transfer learning	English	Conference Paper	Final		Scopus	2-s2.0-85125347124
Shi M., Zheng Y., Wang X., Wang Z., Yang M.	57191925260;57347289600;57347347400;57347317900;25928883700;	Two regulatory factors of Vibrio cholerae activating the mannose-sensitive haemagglutinin pilus expression is important for biofilm formation and colonization in mice	2021	Microbiology (United Kingdom)	2	10.1099/mic.0.001098	https://www.scopus.com/inward/record.uri?eid=2-s2.0-85119458306&doi=10.1099%2fmic.0.001098&partnerID=40&md5=673fd8d0be27000e08aa25fb6e62d6c6	MSHA; RfaH; Transcriptional regulation; Vibrio cholerae; Virulence	English	Article	Final		Scopus	2-s2.0-85119458306
Mateju L., Kynych F., Cerva P., Zdansky J., Malek J.	57151352700;57265049300;13008752200;24345845900;24778343700;	Using X-vectors for speech activity detection in broadcast streams	2021	Proceedings of the Annual Conference of the International Speech Communication Association, INTERSPEECH	1	10.21437/Interspeech.2021-192	https://www.scopus.com/inward/record.uri?eid=2-s2.0-85119190569&doi=10.21437%2fInterspeech.2021-192&partnerID=40&md5=f26b70b854466e616f6b13bd394268c6	Deep neural networks; Speech activity detection; Streamed data processing; X-vectors	English	Conference Paper	Final		Scopus	2-s2.0-85119190569
Posdyshev A.S., Shelyakin P.V., Shaikhutdinov N.M., Popov A.A., Logacheva M.D., Tutukina M.N., Gelfand M.S.	57321953400;55921977000;57190743207;57673138300;11940720000;22939290200;7201803297;	Using DNA-logging to determine inflow profile in horizontal wells	2021	Society of Petroleum Engineers - SPE Russian Petroleum Technology Conference 2021, RPTC 2021		10.2118/SPE-206515-MS	https://www.scopus.com/inward/record.uri?eid=2-s2.0-85118446244&doi=10.2118%2fSPE-206515-MS&partnerID=40&md5=60ef0991c81513d8bfc27c1edf8cbd5f		English	Conference Paper	Final		Scopus	2-s2.0-85118446244
Wu D., Liu H., Zhou Y., Wu X., Nie Y., Cai M.	57221046570;12776427300;7405364058;55714869100;56526086500;24922456800;	Roseomonas oleicola sp. Nov., isolated from an oil production mixture in yumen oilfield, and emended description of roseomonas frigidaquae	2021	International Journal of Systematic and Evolutionary Microbiology	1	10.1099/ijsem.0.005064	https://www.scopus.com/inward/record.uri?eid=2-s2.0-85117936161&doi=10.1099%2fijsem.0.005064&partnerID=40&md5=5841c51fadd9fd2622870def613d3e62	Genome; Oil production mixture; Polyphasic taxonomy; Roseomonas oleicola sp. nov.	English	Article	Final		Scopus	2-s2.0-85117936161
Al-Sayegh A., Al-Wahaibi Y., Joshi S.J., Al-Bahry S., Elshafie A., Al-Bemani A.	56845419200;8616760600;56269886500;6602312734;55398194100;57545947700;	Bacterial diversity of heavy crude oil based mud samples near Omani oil wells	2021	Petroleum Science and Technology	1	10.1080/10916466.2021.1980011	https://www.scopus.com/inward/record.uri?eid=2-s2.0-85117564882&doi=10.1080%2f10916466.2021.1980011&partnerID=40&md5=d73951bf31e92219873706303c1de864	bacterial diversity; bioremediation; heavy crude oil; oil based mud; soil contamination	English	Article	Final		Scopus	2-s2.0-85117564882
Thys M., Souza C., Sauder T., Fonseca N., Berthelsen P.A., Engebretsen E., Haslum H.	56419752200;57208244291;6508089638;7006829371;8417997300;56422131400;6506363422;	Experimental investigation of the coupling between aero- And hydrodynamical loads on a 12 MW semi-submersible floating wind turbine	2021	Proceedings of the International Conference on Offshore Mechanics and Arctic Engineering - OMAE	3	10.1115/OMAE2021-62980	https://www.scopus.com/inward/record.uri?eid=2-s2.0-85117124815&doi=10.1115%2fOMAE2021-62980&partnerID=40&md5=acdce22c4336577f08ec988368b14107	Floating offshore wind turbine; Hardware-in-the-loop; Model tests; Real-Time Hybrid Model testing	English	Conference Paper	Final		Scopus	2-s2.0-85117124815
Yang M., Li J., Lv X.-M., Dai L.-R., Wu K.-J., Tu B., Lawson P.A., Tang Y.-Q., Cheng L.	57212156524;56034093400;57212155345;48761048200;57215543420;57220475457;7103001310;8956229300;57118601200;	Thermosynergistes pyruvativorans gen. Nov., sp. nov., an anaerobic, pyruvate-degrading bacterium from shengli oilfield, and proposal of thermosynergistaceae fam. nov. in the phylum synergistetes	2021	International Journal of Systematic and Evolutionary Microbiology	1	10.1099/ijsem.0.005031	https://www.scopus.com/inward/record.uri?eid=2-s2.0-85115878735&doi=10.1099%2fijsem.0.005031&partnerID=40&md5=26d16f71b584dd4ef4225100a9bb37b5	Thermosynergistaceae fam. nov; Thermosynergistes pyruvativorans	English	Article	Final		Scopus	2-s2.0-85115878735
Li D., Te I., Arivazhagan N., Cherry C., Padfield D.	57261668100;57197718679;57192674087;55074594800;57275326900;	Sentence boundary augmentation for neural machine translation robustness	2021	ICASSP, IEEE International Conference on Acoustics, Speech and Signal Processing - Proceedings	2	10.1109/ICASSP39728.2021.9413492	https://www.scopus.com/inward/record.uri?eid=2-s2.0-85115099180&doi=10.1109%2fICASSP39728.2021.9413492&partnerID=40&md5=3743873af56b1e9ff01adf349f0c926f	Automatic Speech Recognition; Neural Machine Translation; Robustness; Segmentation; Sentence Boundaries	English	Conference Paper	Final	All Open Access, Green	Scopus	2-s2.0-85115099180
Ustalov D., Pavlichenko N., Stelmakh I., Kuznetsov D.	55968856600;57221089620;57218718921;57236178300;	VLDB 2021 crowd science challenge on aggregating crowdsourced audio transcriptions	2021	CEUR Workshop Proceedings			https://www.scopus.com/inward/record.uri?eid=2-s2.0-85113818775&partnerID=40&md5=0add187ff7f87ed330c70f35939e917f	Aggregation; Audio transcription; Crowdsourcing; Speech generation	English	Conference Paper	Final		Scopus	2-s2.0-85113818775
Wang B., Zhao H., Ni S., Ding B.	57836563500;57224616595;26645094000;57199261669;	Integrated Analysis of the Roles of RNA Binding Proteins and Their Prognostic Value in Clear Cell Renal Cell Carcinoma	2021	Journal of Healthcare Engineering	2	10.1155/2021/5568411	https://www.scopus.com/inward/record.uri?eid=2-s2.0-85110454966&doi=10.1155%2f2021%2f5568411&partnerID=40&md5=707293deb1b823f26452ab6b8a85f678		English	Article	Final	All Open Access, Gold, Green	Scopus	2-s2.0-85110454966
Lenchi N., Kebbouche-Gana S., Servais P., Gana M.L., Llirós M.	55771612500;56527412100;7005849675;26039122200;12645566200;	Identification and Phylogenetic Analyses of Anaerobic Sulfidogenic Bacteria in Two Algerian Oilfield Water Injection Samples	2021	Geomicrobiology Journal	1	10.1080/01490451.2021.1939814	https://www.scopus.com/inward/record.uri?eid=2-s2.0-85108609581&doi=10.1080%2f01490451.2021.1939814&partnerID=40&md5=9a834077c3d64650e3d4f48a2f867e29	16S rRNA; clone library; injection water; Sulfidogenic bacteria	English	Article	Final		Scopus	2-s2.0-85108609581
Fischer S.	57209262002;	Mouth as virus reservoir: Protection against infection by reducing the biofilm? [Virusreservoir Mund: Infektionsschutz durch Reduktion des Biofilms?]	2021	Deutsche Apotheker Zeitung			https://www.scopus.com/inward/record.uri?eid=2-s2.0-85106219188&partnerID=40&md5=dd0f34c210ee32a2015b1a3ed3e87e63		German	Article	Final		Scopus	2-s2.0-85106219188
Collier W., Alblas L., Wu J.H.	57191596972;56455335700;54411742100;	A comparison of time domain seismic analysis methods for offshore wind turbine structures: Superelement approach versus integrated approach	2021	Proceedings of the ASME 2021 3rd International Offshore Wind Technical Conference, IOWTC 2021		10.1115/IOWTC2021-3552	https://www.scopus.com/inward/record.uri?eid=2-s2.0-85104953708&doi=10.1115%2fIOWTC2021-3552&partnerID=40&md5=b2dad04f18d9ea2799afc4439f09f9cf	Earthquake.; Foundation; Integrated approach; Offshore wind; Seismic; Structural analysis; Superelement	English	Conference Paper	Final		Scopus	2-s2.0-85104953708
Alexandre A., Antonutti R., Gentils T., Mutricy L., Weyne P.	57002803500;56380441100;57194036433;57223136259;57223127545;	Simplified aerodynamic loading model for non-production conditions for floating wind systems design	2021	Proceedings of the ASME 2021 3rd International Offshore Wind Technical Conference, IOWTC 2021		10.1115/IOWTC2021-3516	https://www.scopus.com/inward/record.uri?eid=2-s2.0-85104948825&doi=10.1115%2fIOWTC2021-3516&partnerID=40&md5=01b00dee99ec889357e16acdd4d98f41	Coupled simulation; Floating wind; Idling; Parked; Reduced model; Simplified	English	Conference Paper	Final		Scopus	2-s2.0-85104948825
Srivastava N., Sarethy I.P.	57189316141;37029055100;	Metabolite fingerprinting of novel streptomyces uk-238 from the hima-layan forest	2021	Current Pharmaceutical Analysis		10.2174/1573412916666200206160836	https://www.scopus.com/inward/record.uri?eid=2-s2.0-85104244466&doi=10.2174%2f1573412916666200206160836&partnerID=40&md5=4ec8e1db6a3e688ff898ae46bd9f0da7	Antimicrobial; Forest; Metabolite fingerprinting; Multidrug resistant; Natural products; Streptomyces	English	Article	Final		Scopus	2-s2.0-85104244466
Gibbon M.J., Couto N., David S., Barden R., Standerwick R., Jagadeesan K., Birkwood H., Dulyayangkul P., Avison M.B., Kannan A., Kibbey D., Craft T., Habib S., Thorpe H.A., Corander J., Kasprzyk-Hordern B., Feil E.J.	57219295296;36614104700;56818495700;56533557600;57221197753;55242353000;57222663108;57191915395;7005876020;57196214589;57222663153;57222662487;57222664387;56888545700;6603490546;6506056329;7004147107;	A high prevalence of blaOXA-48 in Klebsiella (Raoultella) ornithinolytica and related species in hospital wastewater in South West England	2021	Microbial Genomics	6	10.1099/mgen.0.000509	https://www.scopus.com/inward/record.uri?eid=2-s2.0-85103682575&doi=10.1099%2fmgen.0.000509&partnerID=40&md5=9117bc9bacac17720f59310880efee89	Carbapenemase-producing Enterobacteriaceae (CPE); One health; Raoultella ornithinolytica; Wastewater	English	Article	Final	All Open Access, Gold, Green	Scopus	2-s2.0-85103682575
Polak-Witka K., Constantinou A., Schwarzer R., Helmuth J., Wiessner A., Hadam S., Kanti V., Rancan F., Andruck A., Richter C., Moter A., Edelmann A., Rudnicka L., Blume-Peytavi U., Vogt A.	57194784696;57209687722;24467067200;57190843725;55903413400;14026703300;56049631600;6506657109;56664477900;56464706500;6602865163;56417553400;7004034328;7005360175;16949676600;	Identification of anti-microbial peptides and traces of microbial DNA in infrainfundibular compartments of human scalp terminal hair follicles	2021	European Journal of Dermatology	3	10.1684/ejd.2020.3948	https://www.scopus.com/inward/record.uri?eid=2-s2.0-85103015573&doi=10.1684%2fejd.2020.3948&partnerID=40&md5=4da622fe5042314c502afd82654bb0f9	antimicrobial peptides; beta defensins; hair follicle; interleukin-17A; microbiome	English	Article	Final		Scopus	2-s2.0-85103015573
Plescia C.B., David E.A., Patra D., Sengupta R., Amiar S., Su Y., Stahelin R.V.	57119876900;57222502707;37071146300;54796911200;55800687900;57218525765;6602098191;	SARS-CoV-2 viral budding and entry can be modeled using BSL-2 level virus-like particles	2021	Journal of Biological Chemistry	39	10.1074/jbc.RA120.016148	https://www.scopus.com/inward/record.uri?eid=2-s2.0-85102940122&doi=10.1074%2fjbc.RA120.016148&partnerID=40&md5=ea3fe754e34c9df422fd3afe8b9296e5		English	Review	Final	All Open Access, Gold, Green	Scopus	2-s2.0-85102940122
Otwell A.E., Carr A.V., Majumder E.L.W., Ruiz M.K., Wilpiszeski R.L., Hoang L.T., Webb B., Turkarslan S., Gibbons S.M., Elias D.A., Stahl D.A., Siuzdak G., Baliga N.S.	56495557500;57202759140;56374182800;57222322429;23491014300;56003702900;37017894100;6503921720;32867609000;7202565193;56876607300;7006170515;36016046800;	Sulfur metabolites play key system-level roles in modulating denitrification	2021	mSystems	6	10.1128/MSYSTEMS.01025-20	https://www.scopus.com/inward/record.uri?eid=2-s2.0-85102306856&doi=10.1128%2fMSYSTEMS.01025-20&partnerID=40&md5=a0bff32d33d861409b08b454b045ff5a	Cysteine; Denitrification; Environmental microbiology; Hydrogen sulfide; Metabolomics; Microbial ecology; Nitrate-reducing bacteria; Systems biology; Transcriptomics	English	Article	Final	All Open Access, Gold, Green	Scopus	2-s2.0-85102306856
Wan Y.Y., Luo N., Liu X.-L., Lai Q.-L., Goodfellow M.	8638301900;57222120495;57211525455;25624819200;7102073615;	Cupidesulfovibrio liaohensis gen. Nov., sp. nov., a novel sulphate-reducing bacterium isolated from an oil reservoir and reclassification of desulfovibrio oxamicus and desulfovibrio termitidis as cupidesulfovibrio oxamicus comb. nov. and cupidesulfovibrio termitidis comb. nov.	2021	International Journal of Systematic and Evolutionary Microbiology	5	10.1099/ijsem.0.004618	https://www.scopus.com/inward/record.uri?eid=2-s2.0-85101564724&doi=10.1099%2fijsem.0.004618&partnerID=40&md5=33b64b7f64fb4d17f1ed2293f9f6e424	Cupidesulfovibrio; Hydrogen Sulfide; Novel genus; Novel species; Oilfield; Polyphasic taxonomy; Sulfate-reducing bacteria	English	Article	Final		Scopus	2-s2.0-85101564724
Wang L., Shao M., Kou G., Wang M., Zhang R., Wei Z., Sun X.	7409188827;57221808395;57208524153;57221809958;57221190563;57221802249;57226025415;	Time Series Analysis of Production Decline in Carbonate Reservoirs with Machine Learning	2021	Geofluids	3	10.1155/2021/6638135	https://www.scopus.com/inward/record.uri?eid=2-s2.0-85100251394&doi=10.1155%2f2021%2f6638135&partnerID=40&md5=e20e597b18ea18b71e0fa666704cdaba		English	Article	Final	All Open Access, Gold	Scopus	2-s2.0-85100251394
Álvarez-Rivera O.O., Estrada-Medina H., Jiménez-Osornio J.J.	56906964200;57204370691;56000782900;	Inorganic carbon sequestration: The oxalate-carbonate pathway in calcareous karstic environments [Secuestro inorgánico de carbono: La ruta oxalatocarbonato en ambientes kársticos calcáreos]	2021	Tropical and Subtropical Agroecosystems	1		https://www.scopus.com/inward/record.uri?eid=2-s2.0-85100246731&partnerID=40&md5=e23687cb1f7aac2b5640a36a7d4f7fb8	Calcium carbonate; Calcium oxalate; Carbon sequestration; Inorganic soil carbon; Karst	Spanish	Review	Final		Scopus	2-s2.0-85100246731
Ali N.M., Al-Saadi A.G.M.	57221729239;57204422102;	Molecular, biochemical, and phenotypic identification of phenol and cresol degrading acinetobacter baumanni strain selected from al-rumaila oil well	2021	Indian Journal of Forensic Medicine and Toxicology		10.37506/ijfmt.v15i1.13773	https://www.scopus.com/inward/record.uri?eid=2-s2.0-85099921346&doi=10.37506%2fijfmt.v15i1.13773&partnerID=40&md5=442cd09be260dbb89f4e01d77a55319e	16S rRNA; Acinetobacter baumanni; Biodegradation; Cresol; Phenol	English	Article	Final		Scopus	2-s2.0-85099921346
Buommino E., Vollaro A., Nocera F.P., Lembo F., Dellagreca M., De Martino L., Catania M.R.	6601921096;57219219598;56496591000;6603280227;7003392334;6701449014;7004369035;	Synergistic effect of abietic acid with oxacillin against methicillin-resistant staphylococcus pseudintermedius	2021	Antibiotics	9	10.3390/antibiotics10010080	https://www.scopus.com/inward/record.uri?eid=2-s2.0-85099795876&doi=10.3390%2fantibiotics10010080&partnerID=40&md5=8059d2f881beb5cd1baf391799f6b9e2	Abietic acid; Antimicrobial activity; Methicillin-resistant Staphylococcus pseud-intermedius; Methicillin-susceptible Staphylococcus pseudintermedius; Staphylococcus pseudintermedius; Synergistic interaction	English	Article	Final	All Open Access, Gold, Green	Scopus	2-s2.0-85099795876
Liu X., Wang Y., Gu J.-D.	55542030800;57202471652;7403129601;	Ecological distribution and potential roles of Woesearchaeota in anaerobic biogeochemical cycling unveiled by genomic analysis	2021	Computational and Structural Biotechnology Journal	12	10.1016/j.csbj.2021.01.013	https://www.scopus.com/inward/record.uri?eid=2-s2.0-85099778268&doi=10.1016%2fj.csbj.2021.01.013&partnerID=40&md5=2ec0a398eae135bcdeb88dc64850edcb	Anaerobic carbon cycling; Ecological patterns; Nitrogen cycling; Sulfur cycling; Woesearchaeota	English	Article	Final	All Open Access, Gold, Green	Scopus	2-s2.0-85099778268
Wu D., Zhang X.-J., Liu H.-C., Zhou Y.-G., Wu X.-L., Nie Y., Kang Y.-Q., Cai M.	57221046570;57216566226;12776427300;7405364058;55714869100;56526086500;15020597700;24922456800;	Azospirillum oleiclasticum sp. nov, a nitrogen-fixing and heavy oil degrading bacterium isolated from an oil production mixture of Yumen Oilfield	2021	Systematic and Applied Microbiology	5	10.1016/j.syapm.2020.126171	https://www.scopus.com/inward/record.uri?eid=2-s2.0-85098062035&doi=10.1016%2fj.syapm.2020.126171&partnerID=40&md5=3f7a76f97c7622632496f54ff6a89826	Azospirillum oleiclasticumsp. nov.; genome; heavy oil degradation; nitrogen-fixing; polyphasic taxonomy; whole-cell protein	English	Article	Final		Scopus	2-s2.0-85098062035
Reis I.N.R., do Amaral G.C.L.S., Mendoza A.A.H., das Graças Y.T., Mendes-Correa M.C., Romito G.A., Pannuti C.M.	57220602011;57206891141;57220602717;57218844824;6508242628;6603098624;7006754400;	Can preprocedural mouthrinses reduce SARS-CoV-2 load in dental aerosols?	2021	Medical Hypotheses	13	10.1016/j.mehy.2020.110436	https://www.scopus.com/inward/record.uri?eid=2-s2.0-85097463735&doi=10.1016%2fj.mehy.2020.110436&partnerID=40&md5=7fe3d0c510bf5e9ed73589247b381334	Aerosol; Coronavirus; Covid-19; Mouthrinses; Mouthwashes; SARS-CoV-2	English	Article	Final	All Open Access, Bronze, Green	Scopus	2-s2.0-85097463735
Jones A.A., Pilloni G., Claypool J.T., Paiva A.R., Summers Z.M.	56022223100;36086530500;55368314100;57542780800;36698477800;	Evidence of sporulation capability of the ubiquitous oil reservoir microbe Halanaerobium congolense	2021	Geomicrobiology Journal	2	10.1080/01490451.2020.1842944	https://www.scopus.com/inward/record.uri?eid=2-s2.0-85096128672&doi=10.1080%2f01490451.2020.1842944&partnerID=40&md5=93eaff804365ae8a0e477e1e8605a90e	Halanaerobium; hydrocarbon reservoir microbiology; Sporulation; subsurface; transcriptomics	English	Article	Final	All Open Access, Hybrid Gold	Scopus	2-s2.0-85096128672
Patra S.K., Haldar S.	57392125300;23667484800;	Fore-aft and the side-to-side response of monopile supported offshore wind turbine in liquefiable soil	2021	Marine Georesources and Geotechnology	6	10.1080/1064119X.2020.1843570	https://www.scopus.com/inward/record.uri?eid=2-s2.0-85095742242&doi=10.1080%2f1064119X.2020.1843570&partnerID=40&md5=b64fb7c5ccf22b168d450f29fa6be9b9	fore-aft direction; Liquefaction; monopile; offshore wind turbine; side-to-side direction; soil-structure-interaction	English	Article	Final		Scopus	2-s2.0-85095742242
Zhou L., Hu Q.-Q., Lu Y.-W., Mbadinga S.M., Liu Y.-F., Li X.-X., Wang B., Lv H., Liu J.-F., Yang S.-Z., Gu J.-D., Mu B.-Z.	55710625100;57209219197;57209731742;36802004800;57285027300;56166231200;57218901965;57219344890;36096880500;8719114200;7403129601;55509556000;	Dominant and Active Methanogens in the Production Waters From a High-Temperature Petroleum Reservoir by DNA- and RNA-Based Analysis	2021	Geomicrobiology Journal	1	10.1080/01490451.2020.1822958	https://www.scopus.com/inward/record.uri?eid=2-s2.0-85092272111&doi=10.1080%2f01490451.2020.1822958&partnerID=40&md5=6084288e586eb9a36d87ba331874529c	mcrA; Methanogen; methanogenesis; petroleum reservoir; RNA	English	Article	Final		Scopus	2-s2.0-85092272111
Capriotti M., Cocci P., Bracchetti L., Cottone E., Scandiffio R., Caprioli G., Sagratini G., Mosconi G., Bovolin P., Palermo F.A.	57191995344;48760972800;53879431200;6602715759;57211806755;24175928800;56962738100;7006571292;6602115345;9634229200;	Microplastics and their associated organic pollutants from the coastal waters of the central Adriatic Sea (Italy): Investigation of adipogenic effects in vitro	2021	Chemosphere	13	10.1016/j.chemosphere.2020.128090	https://www.scopus.com/inward/record.uri?eid=2-s2.0-85090046044&doi=10.1016%2fj.chemosphere.2020.128090&partnerID=40&md5=796a3e1c60a7ecd7dbbb7af8fa0029a3	Adipocytes; Adriatic sea; Biomonitoring; Endocrine disruptors; Metabolic disruptors; Microplastic	English	Article	Final	All Open Access, Green	Scopus	2-s2.0-85090046044
Díaz-Puente F.J., Schmid T., Pelayo M., Rodríguez-Rastrero M., Herraiz M.J.S., O'Neill T., López-Martínez J.	57218657388;57202665192;35579345300;37023317400;57218659375;55362081100;7006900423;	Abiotic factors influencing soil microbial activity in the northern Antarctic Peninsula region	2021	Science of the Total Environment	2	10.1016/j.scitotenv.2020.141602	https://www.scopus.com/inward/record.uri?eid=2-s2.0-85089945721&doi=10.1016%2fj.scitotenv.2020.141602&partnerID=40&md5=a36ee55c4d2830ac8ba4cdac4de8c505	Microbial activity; Mineralization; Organic matter; Soils; South Shetland Islands	English	Article	Final	All Open Access, Green	Scopus	2-s2.0-85089945721
Abe K., Nomura N., Suzuki S.	55464456300;7102171584;55553739019;	Biofilms: Hot spots of horizontal gene transfer (HGT) in aquatic environments, with a focus on a new HGT mechanism	2021	FEMS Microbiology Ecology	103	10.1093/FEMSEC/FIAA031	https://www.scopus.com/inward/record.uri?eid=2-s2.0-85084183609&doi=10.1093%2fFEMSEC%2fFIAA031&partnerID=40&md5=57206973ae463543fc4d2da06f9cb33a	Antibiotic resistance gene; Biofilm; Horizontal gene transfer; Membrane vesicle; Water environment	English	Review	Final	All Open Access, Hybrid Gold, Green	Scopus	2-s2.0-85084183609
Wang H., Kuang S., Lang Q., Yu W.	57189446233;7006330384;55170628200;55941190200;	Effects of aged oil sludge on soil physicochemical properties and fungal diversity revealed by high-throughput sequencing analysis	2021	Archaea	9	10.1155/2018/9264259	https://www.scopus.com/inward/record.uri?eid=2-s2.0-85054088426&doi=10.1155%2f2018%2f9264259&partnerID=40&md5=61a6e1c05262081b72a86d8bd1dfff88		English	Article	Final	All Open Access, Gold, Green	Scopus	2-s2.0-85054088426
Litsa E.E., Das P., Kavraki L.E.	57221329819;57204560772;7004243865;	Prediction of drug metabolites using neural machine translation	2020	Chemical Science	10	10.1039/d0sc02639e	https://www.scopus.com/inward/record.uri?eid=2-s2.0-85097906218&doi=10.1039%2fd0sc02639e&partnerID=40&md5=7041a02ab43243742bc572ddab5852a5		English	Article	Final	All Open Access, Gold, Green	Scopus	2-s2.0-85097906218
Parra R., Bukkens S.G.F., Giampietro M.	57209756553;6603560703;7004081868;	Exploration of the environmental implications of ageing conventional oil reserves with relational analysis	2020	Science of the Total Environment	4	10.1016/j.scitotenv.2020.142371	https://www.scopus.com/inward/record.uri?eid=2-s2.0-85091337424&doi=10.1016%2fj.scitotenv.2020.142371&partnerID=40&md5=05085de4f53c8312b67579aa21409fb9	Ageing; Conventional oil; Ecuador; Energy-water nexus; Produced water; Relational analysis; Resource quality	English	Article	Final	All Open Access, Hybrid Gold, Green	Scopus	2-s2.0-85091337424
Mirzaie M., Tatar A.	57219388060;55839820500;	Modeling of interfacial tension in binary mixtures of CH4, CO2, and N2 - alkanes using gene expression programming and equation of state	2020	Journal of Molecular Liquids	15	10.1016/j.molliq.2020.114454	https://www.scopus.com/inward/record.uri?eid=2-s2.0-85092471853&doi=10.1016%2fj.molliq.2020.114454&partnerID=40&md5=5206673a10ae28faa58a270368ee52b4	Alkanes; EOR; Equation of state (EoS); Genetic expression programming (GEP); Interfacial tension	English	Article	Final		Scopus	2-s2.0-85092471853
Chen Y., Pan J., Yun Y., Zhi B., Li G., Li M., Ma T.	57210909133;56326260500;56956317600;57204058360;55711209100;57199160246;55728800200;	Halomonas plays a central role in the syntrophic community of an alkaline oil reservoir with alkali-surfactant-polymer (ASP) flooding	2020	Science of the Total Environment	8	10.1016/j.scitotenv.2020.141333	https://www.scopus.com/inward/record.uri?eid=2-s2.0-85089266133&doi=10.1016%2fj.scitotenv.2020.141333&partnerID=40&md5=0bb593bed8fd9602f15642378cdae278	Alkane stress; Metabolic potential; Metagenomic sequencing; Microbial syntrophic network; Survival mechanism	English	Article	Final		Scopus	2-s2.0-85089266133
Roumagnac M., Pradel N., Bartoli M., Garel M., Jones A.A., Armougom F., Fenouil R., Tamburini C., Ollivier B., Summers Z.M., Dolla A.	55605219700;6603608517;55753667700;25926396800;56022223100;14218907900;57496231400;6701843170;7005143327;36698477800;7004243115;	Responses to the Hydrostatic Pressure of Surface and Subsurface Strains of Pseudothermotoga elfii Revealing the Piezophilic Nature of the Strain Originating From an Oil-Producing Well	2020	Frontiers in Microbiology	4	10.3389/fmicb.2020.588771	https://www.scopus.com/inward/record.uri?eid=2-s2.0-85097817096&doi=10.3389%2ffmicb.2020.588771&partnerID=40&md5=19ae6e6f0d004206b773db90e69525a7	chained cells; hydrostatic pressure; oil-reservoir; piezophile; Pseudothermotoga; thermophilic anaerobes	English	Article	Final	All Open Access, Gold, Green	Scopus	2-s2.0-85097817096
Dutta A., Smith B., Goldman T., Walker L., Streets M., Eden B., Dirmeier R., Bowman J.S.	57191752767;55476102000;57220873463;57194042496;57194031943;56379897300;57445142800;7401849722;	Understanding Microbial Community Dynamics in Up-Flow Bioreactors to Improve Mitigation Strategies for Oil Souring	2020	Frontiers in Microbiology	5	10.3389/fmicb.2020.585943	https://www.scopus.com/inward/record.uri?eid=2-s2.0-85097772105&doi=10.3389%2ffmicb.2020.585943&partnerID=40&md5=88b6978e8d511234f7b6e8b610437334	biosouring; marine microbes; microbial community; mitigation; volatile fatty acids	English	Article	Final	All Open Access, Gold, Green	Scopus	2-s2.0-85097772105
Chakraborty S., Govindarajan S.K., Gummadi S.N.	57218584648;57217596517;6603099886;	Numerical modeling on the influence of effective porosity, microbial kinetics, and operational parameters on enhanced oil recovery by microbial flooding within a sandstone formation	2020	SPE Journal	5	10.2118/200639-PA	https://www.scopus.com/inward/record.uri?eid=2-s2.0-85100204535&doi=10.2118%2f200639-PA&partnerID=40&md5=17b053f65019df004d6e3d65d65730fe		English	Article	Final		Scopus	2-s2.0-85100204535
Fukuto H.S., Viboud G.I., Vadyvaloo V.	6508044597;6601914970;57203111073;	The diverse roles of the global transcriptional regulator phop in the lifecycle of yersinia pestis	2020	Pathogens	2	10.3390/pathogens9121039	https://www.scopus.com/inward/record.uri?eid=2-s2.0-85097679371&doi=10.3390%2fpathogens9121039&partnerID=40&md5=039b75e0b30f8111dde075e5359011ca	Flea; Insect vectors; Phagocytes; PhoP; Plague; Transcription; Yersinia pestis	English	Review	Final	All Open Access, Gold, Green	Scopus	2-s2.0-85097679371
Ren G., Wang J., Qu L., Li W., Hu M., Bian L., Zhang Y., Le J., Dou X., Chen X., Bai L., Li Y.	24399980500;57196747443;55777622200;57211198844;57220814465;57220810887;57220816774;25225817600;25225407700;57220812380;55595503300;57197730295;	Compositions and Co-occurrence Patterns of Bacterial Communities Associated With Polymer- and ASP-Flooded Petroleum Reservoir Blocks	2020	Frontiers in Microbiology	4	10.3389/fmicb.2020.580363	https://www.scopus.com/inward/record.uri?eid=2-s2.0-85097670599&doi=10.3389%2ffmicb.2020.580363&partnerID=40&md5=2bab0069a5d649714b1938f11c42504f	ASP-flooding; bacterial community composition; Illumina MiSeq sequencing; network analysis; polymer-flooding	English	Article	Final	All Open Access, Gold, Green	Scopus	2-s2.0-85097670599
Azam M., Kumar V., Siddiqui K., Jan A.T., Sabir J.S.M., Rather I.A., Rehman S., Haq Q.M.R.	55171206800;57212901361;57002680700;35229587600;25825595300;55221798800;23994437200;8663274800;	Pharmaceutical disposal facilitates the mobilization of resistance determinants among microbiota of polluted environment	2020	Saudi Pharmaceutical Journal	1	10.1016/j.jsps.2020.10.009	https://www.scopus.com/inward/record.uri?eid=2-s2.0-85095830784&doi=10.1016%2fj.jsps.2020.10.009&partnerID=40&md5=e401a9098fa102112bd10381e46ab295	Conjugation frequency; Dissemination; E. coli; ESBLs; Multidrug resistance; Resistance prevalence	English	Article	Final	All Open Access, Gold, Green	Scopus	2-s2.0-85095830784
Rostami A., Raef A., Kamari A., Totten M.W., Abdelwahhab M., Panacharoensawad E.	57188924492;6503876823;56532174100;7003664221;57192363911;23493463600;	Rigorous framework determining residual gas saturations during spontaneous and forced imbibition using gene expression programming	2020	Journal of Natural Gas Science and Engineering	6	10.1016/j.jngse.2020.103644	https://www.scopus.com/inward/record.uri?eid=2-s2.0-85092673065&doi=10.1016%2fj.jngse.2020.103644&partnerID=40&md5=bc45b8a572ac9d0d6a127d925eb5e8f2	Aquifer drive gas reservoir; Correlation; Error analysis; Gene expression programming; Residual gas saturation; Sensitivity analysis	English	Article	Final		Scopus	2-s2.0-85092673065
Pirzadian J., Harteveld S.P., Ramdutt S.N., van Wamel W.J.B., Klaassen C.H.W., Vos M.C., Severin J.A.	57219396333;57219388793;57219389778;6603571521;56035012300;35475664100;8700385500;	Novel use of culturomics to identify the microbiota in hospital sink drains with and without persistent VIM-positive Pseudomonas aeruginosa	2020	Scientific Reports	7	10.1038/s41598-020-73650-8	https://www.scopus.com/inward/record.uri?eid=2-s2.0-85092506301&doi=10.1038%2fs41598-020-73650-8&partnerID=40&md5=0612f66b488ff3d79f84c987de06266e		English	Article	Final	All Open Access, Gold, Green	Scopus	2-s2.0-85092506301
Wen B., Li Z., Jiang Z., Peng Z., Dong X., Tian X.	57194166483;57188971685;57214596164;7401790868;8598180400;55265504600;	Experimental study on the tower loading characteristics of a floating wind turbine based on wave basin model tests	2020	Journal of Wind Engineering and Industrial Aerodynamics	6	10.1016/j.jweia.2020.104390	https://www.scopus.com/inward/record.uri?eid=2-s2.0-85091909809&doi=10.1016%2fj.jweia.2020.104390&partnerID=40&md5=d2f101a6ae41c8af899fbedf5cb2c927	Floating wind turbine; Model test; Resonance vibration; Tower load; Vibration isolation	English	Article	Final		Scopus	2-s2.0-85091909809
Bhattacharya S.P., Bhattacharya A., Sen A.	57219030719;23033070700;57215799732;	A comprehensive and comparative study on the action of pentacyclic triterpenoids on Vibrio cholerae biofilms	2020	Microbial Pathogenesis	4	10.1016/j.micpath.2020.104493	https://www.scopus.com/inward/record.uri?eid=2-s2.0-85091087869&doi=10.1016%2fj.micpath.2020.104493&partnerID=40&md5=ec2d21ce10bd16be2b4cccf7a6064b71	Antibiotics; Biofilm; Pentacyclic triterpenoids; Quorum sensing; Vibrio	English	Article	Final	All Open Access, Green	Scopus	2-s2.0-85091087869
Platz M.C., Takeshita Y., Bartels E., Arias M.E.	57195588672;54783486400;24831967800;23011471800;	Evaluating the potential for autonomous measurements of net community production and calcification as a tool for monitoring coral restoration	2020	Ecological Engineering	6	10.1016/j.ecoleng.2020.106042	https://www.scopus.com/inward/record.uri?eid=2-s2.0-85090596310&doi=10.1016%2fj.ecoleng.2020.106042&partnerID=40&md5=10e2f654b839a59416ae6ca24098088a	Acropora cervicornis; Benthic ecosystem and acidification measurement system; Ecosystem metabolism; Florida Reef Tract	English	Article	Final	All Open Access, Bronze	Scopus	2-s2.0-85090596310
Turrini P., Tescari M., Visaggio D., Pirolo M., Lugli G.A., Ventura M., Frangipani E., Visca P.	57218660708;57201457417;53864413400;57204283115;55785683900;7201760345;6504790804;57209139390;	The microbial community of a biofilm lining the wall of a pristine cave in Western New Guinea	2020	Microbiological Research	11	10.1016/j.micres.2020.126584	https://www.scopus.com/inward/record.uri?eid=2-s2.0-85089938064&doi=10.1016%2fj.micres.2020.126584&partnerID=40&md5=881e7d29816bf73da87aa7605edebc19	16S rRNA; Antibiotics; Culturomics; Karst caves; MLSA; Shotgun sequencing	English	Article	Final	All Open Access, Bronze	Scopus	2-s2.0-85089938064
Liu J.-F., Lu Y.-W., Zhou L., Li W., Hou Z.-W., Yang S.-Z., Wu X.-L., Gu J.-D., Mu B.-Z.	36096880500;57209731742;55710625100;57211198844;7201896697;8719114200;55714809900;7403129601;55509556000;	Simultaneous detection of transcribed functional assA gene and the corresponding metabolites of linear alkanes (C4, C5, and C7) in production water of a low-temperature oil reservoir	2020	Science of the Total Environment	3	10.1016/j.scitotenv.2020.141290	https://www.scopus.com/inward/record.uri?eid=2-s2.0-85088870097&doi=10.1016%2fj.scitotenv.2020.141290&partnerID=40&md5=442db9215f84a17553f839e1ebbeaa4a	Alkanes; Biodegradation; Fumarate addition; Methanogenesis; Oil reservoir; Transcripts	English	Article	Final		Scopus	2-s2.0-85088870097
Salgar-Chaparro S.J., Darwin A., Kaksonen A.H., Machuca L.L.	57090962300;36174873500;6603145161;43861654600;	Carbon steel corrosion by bacteria from failed seal rings at an offshore facility	2020	Scientific Reports	24	10.1038/s41598-020-69292-5	https://www.scopus.com/inward/record.uri?eid=2-s2.0-85088390404&doi=10.1038%2fs41598-020-69292-5&partnerID=40&md5=72e14d448f36067d29f2913a7ac29c52		English	Article	Final	All Open Access, Gold, Green	Scopus	2-s2.0-85088390404
Christman G.D., León-Zayas R.I., Zhao R., Summers Z.M., Biddle J.F.	14046718600;57000430800;57189629315;36698477800;12775385800;	Novel clostridial lineages recovered from metagenomes of a hot oil reservoir	2020	Scientific Reports	6	10.1038/s41598-020-64904-6	https://www.scopus.com/inward/record.uri?eid=2-s2.0-85084787934&doi=10.1038%2fs41598-020-64904-6&partnerID=40&md5=3a70441b371e02fc6552f98564b09035		English	Article	Final	All Open Access, Gold, Green	Scopus	2-s2.0-85084787934
Tram G., Klare W.P., Cain J.A., Mourad B., Cordwell S.J., Day C.J., Korolik V.	55265908900;57189465112;56012619600;57213625394;6701490362;7201846761;6601925371;	Assigning a role for chemosensory signal transduction in Campylobacter jejuni biofilms using a combined omics approach	2020	Scientific Reports	5	10.1038/s41598-020-63569-5	https://www.scopus.com/inward/record.uri?eid=2-s2.0-85083781860&doi=10.1038%2fs41598-020-63569-5&partnerID=40&md5=cb2d41367f26a3efe2d8f6163e4db1c2		English	Article	Final	All Open Access, Gold, Green	Scopus	2-s2.0-85083781860
Chen J., Liu Y.-F., Zhou L., Irfan M., Hou Z.-W., Li W., Mbadinga S.M., Liu J.-F., Yang S.-Z., Wu X.-L., Gu J.-D., Mu B.-Z.	57208251789;57285027300;55710625100;57224793869;7201896697;57211198844;36802004800;36096880500;8719114200;55714809900;7403129601;55509556000;	Long-chain n-alkane biodegradation coupling to methane production in an enriched culture from production water of a high-temperature oil reservoir	2020	AMB Express	10	10.1186/s13568-020-00998-5	https://www.scopus.com/inward/record.uri?eid=2-s2.0-85083256075&doi=10.1186%2fs13568-020-00998-5&partnerID=40&md5=0613e190321ae8c2f6c16c1fb3067c5f	Anaerobic biodegradation; High-temperature oil/petroleum reservoir; Long-chain n-alkanes; Metabolic pathway; Methanogenesis	English	Article	Final	All Open Access, Gold, Green	Scopus	2-s2.0-85083256075
Ji J.-H., Zhou L., Mbadinga S.M., Irfan M., Liu Y.-F., Pan P., Qi Z.-Z., Chen J., Liu J.-F., Yang S.-Z., Gu J.-D., Mu B.-Z.	57210590513;55710625100;36802004800;57224793869;57285027300;57200706811;57209293288;57208251789;36096880500;8719114200;7403129601;55509556000;	Methanogenic biodegradation of C9 to C12 n-alkanes initiated by Smithella via fumarate addition mechanism	2020	AMB Express	19	10.1186/s13568-020-0956-5	https://www.scopus.com/inward/record.uri?eid=2-s2.0-85078858094&doi=10.1186%2fs13568-020-0956-5&partnerID=40&md5=e9a54b3dbf52a9e65c371d2a7c54aa5a	Alkanes; Alkylsuccinates; Fumarate addition; Methanogenesis; Oil reservoirs	English	Article	Final	All Open Access, Gold, Green	Scopus	2-s2.0-85078858094
Cui Y., Schmid B.V., Cao H., Dai X., Du Z., Ryan Easterday W., Fang H., Guo C., Huang S., Liu W., Qi Z., Song Y., Tian H., Wang M., Wu Y., Xu B., Yang C., Yang J., Yang X., Zhang Q., Jakobsen K.S., Zhang Y., Stenseth N.C., Yang R.	24480809600;25641976900;23987614400;24576732900;8636025800;36341227800;56580989100;56048104600;56333817500;57216333828;9278826700;8542368300;57603675900;57818442800;57208357119;57205434882;57200256764;57213671927;55278100500;55699330600;7005413513;15830663300;16040160500;55547041600;	Evolutionary selection of biofilm-mediated extended phenotypes in Yersinia pestis in response to a fluctuating environment	2020	Nature Communications	13	10.1038/s41467-019-14099-w	https://www.scopus.com/inward/record.uri?eid=2-s2.0-85077940857&doi=10.1038%2fs41467-019-14099-w&partnerID=40&md5=548d23aa7ff5d64e116420144c850c8e		English	Article	Final	All Open Access, Gold, Green	Scopus	2-s2.0-85077940857
Göschlberger B., Dopler F., Brandstetter C.	57191271399;57221831175;57215564398;	Managing Learning Resource Metadata for Secondary Education	2020	ACM International Conference Proceeding Series	1	10.1145/3428757.3429148	https://www.scopus.com/inward/record.uri?eid=2-s2.0-85100343446&doi=10.1145%2f3428757.3429148&partnerID=40&md5=d63c22ee42d7f9df5cca3c2c4d51cd9c	json schema; learning resource metadata; metadata management; transcriptivity	English	Conference Paper	Final		Scopus	2-s2.0-85100343446
Grouzdev D.S., Sokolova D.S., Poltaraus A.B., Nazina T.N.	55683461500;6602552612;56269272700;6603798988;	Draft genome sequence of halomonas titanicae strain TAT1, a hydrocarbon-oxidizing halophilic bacterium isolated from a petroleum reservoir in Russia	2020	Microbiology Resource Announcements	3	10.1128/MRA.01255-20	https://www.scopus.com/inward/record.uri?eid=2-s2.0-85097265903&doi=10.1128%2fMRA.01255-20&partnerID=40&md5=25afc6f0c1ad0be80f0b2c28a15a2b7a		English	Article	Final	All Open Access, Green	Scopus	2-s2.0-85097265903
Mullin S.W., Wanger G., Kruger B.R., Sackett J.D., Hamilton-Brehm S.D., Bhartia R., Amend J.P., Moser D.P., Orphan V.J.	56060624900;10040990600;57201194372;57196086187;8978094600;12760022900;7005407525;7101785507;6603895850;	Patterns of in situ Mineral Colonization by Microorganisms in a ~60°C Deep Continental Subsurface Aquifer	2020	Frontiers in Microbiology	3	10.3389/fmicb.2020.536535	https://www.scopus.com/inward/record.uri?eid=2-s2.0-85097243642&doi=10.3389%2ffmicb.2020.536535&partnerID=40&md5=d7ad4a603a84f0323b94364e14fb2654	carbonate; deep biosphere; fractured rock; methanogenesis; microbial ecology; microbial succession; mineral colonization; pyrite	English	Article	Final	All Open Access, Gold, Green	Scopus	2-s2.0-85097243642
Vavourakis C.D., Heijnen L., Peters M.C.F.M., Marang L., Ketelaars H.A.M., Hijnen W.A.M.	56335487500;7004331664;57219969090;36630803600;6701690057;6701466614;	Spatial and Temporal Dynamics in Attached and Suspended Bacterial Communities in Three Drinking Water Distribution Systems with Variable Biological Stability	2020	Environmental Science and Technology	12	10.1021/acs.est.0c04532	https://www.scopus.com/inward/record.uri?eid=2-s2.0-85096347941&doi=10.1021%2facs.est.0c04532&partnerID=40&md5=ad1d6143e3ecb4c85f5a61a230500665		English	Article	Final		Scopus	2-s2.0-85096347941
Elgamoudi B.A., Taha T., Korolik V.	57197831973;57220026514;6601925371;	Inhibition of campylobacter jejuni biofilm formation by d-amino acids	2020	Antibiotics	9	10.3390/antibiotics9110836	https://www.scopus.com/inward/record.uri?eid=2-s2.0-85096611219&doi=10.3390%2fantibiotics9110836&partnerID=40&md5=f6ef019e3136423277527b45f7382bf3	Alanine racemase; Biofilm; Campylobacter jejuni; Confocal laser scanning microscopy; D-amino acids	English	Article	Final	All Open Access, Gold, Green	Scopus	2-s2.0-85096611219
Zhuang D., Guo Y., Chen S.	57191252043;57219286005;37062846900;	Comparative study on thermodynamic and geochemical characteristics between cemented and clotted parts of thrombolite	2020	Crystals		10.3390/cryst10111017	https://www.scopus.com/inward/record.uri?eid=2-s2.0-85096017338&doi=10.3390%2fcryst10111017&partnerID=40&md5=b3311dfd0db051a8a8e7f457b90b9592	Activation energy; Carbon isotope; Crystallinity; Thermochemical technique; Thrombolite	English	Article	Final	All Open Access, Gold	Scopus	2-s2.0-85096017338
Barbato M., Scoma A.	55774103400;36154780600;	Mild hydrostatic-pressure (15 MPa) affects the assembly, but not the growth, of oil-degrading coastal microbial communities tested under limiting conditions (5°C, no added nutrients)	2020	FEMS Microbiology Ecology	3	10.1093/femsec/fiaa160	https://www.scopus.com/inward/record.uri?eid=2-s2.0-85095666113&doi=10.1093%2ffemsec%2ffiaa160&partnerID=40&md5=c986fadc96af1fbc3e4f35d3adb19d49	Amplicon sequencing; Bioremediation; Flow cytometry; Hydrostatic pressure; Oil degradation; Petroleum hydrocarbon	English	Article	Final		Scopus	2-s2.0-85095666113
Higgins M.A., Robbins G.A., Maas K.R., Binkhorst G.K.	57218511224;7006745862;57196962330;6701821729;	Use of bacteria community analysis to distinguish groundwater recharge sources to shallow wells	2020	Journal of Environmental Quality	3	10.1002/jeq2.20150	https://www.scopus.com/inward/record.uri?eid=2-s2.0-85092319686&doi=10.1002%2fjeq2.20150&partnerID=40&md5=dbff34c6c53c222f2138fa8e3df6a264		English	Article	Final		Scopus	2-s2.0-85092319686
Phulpoto I.A., Jakhrani B.A., Phulpoto A.H., Panhyar A.A., Kanhar N.A., Ahmed S., Qazi M.A.	57212592575;57218799978;57028449000;57218802874;25960990300;7402715588;56190097800;	Enhanced Oil Recovery by Potential Biosurfactant-Producing Halo-thermotolerant Bacteria Using Soil Washing and Sand-Packed Glass Column Techniques	2020	Current Microbiology	5	10.1007/s00284-020-02172-3	https://www.scopus.com/inward/record.uri?eid=2-s2.0-85090311795&doi=10.1007%2fs00284-020-02172-3&partnerID=40&md5=35d0041df937e7e344493a49f4378860		English	Article	Final		Scopus	2-s2.0-85090311795
Amaral-Silva L., Tazawa H., Bícego K.C., Burggren W.W.	57193572755;56609914800;8068376800;7005365106;	Metabolic and Hematological Responses to Endotoxin-Induced Inflammation in Chicks Experiencing Embryonic 2,3,7,8-Tetrachlorodibenzodioxin Exposure	2020	Environmental Toxicology and Chemistry	4	10.1002/etc.4832	https://www.scopus.com/inward/record.uri?eid=2-s2.0-85090058982&doi=10.1002%2fetc.4832&partnerID=40&md5=4076553da17c805a462993ab8cedb00c	Avian toxicity; Dioxins; Embryos; Immunotoxicity; Inflammation; Metabolism	English	Article	Final		Scopus	2-s2.0-85090058982
Desbois A.P., Cook K.J., Buba E.	24390725600;57218650528;57218652038;	Antibiotics modulate biofilm formation in fish pathogenic isolates of atypical Aeromonas salmonicida	2020	Journal of Fish Diseases	6	10.1111/jfd.13232	https://www.scopus.com/inward/record.uri?eid=2-s2.0-85089920822&doi=10.1111%2fjfd.13232&partnerID=40&md5=7fbc3db7037d8e7a84e79cab61969449	antimicrobial; aquaculture; ballan wrasse; cleaner fish; florfenicol; oxytetracycline	English	Article	Final	All Open Access, Green	Scopus	2-s2.0-85089920822
Zhou A., Li X.-S., Ren X.-D., Gu C.-W.	57200114506;57192394504;36024283000;7202186503;	Improvement design and analysis of a supercritical CO2/transcritical CO2 combined cycle for offshore gas turbine waste heat recovery	2020	Energy	21	10.1016/j.energy.2020.118562	https://www.scopus.com/inward/record.uri?eid=2-s2.0-85089810206&doi=10.1016%2fj.energy.2020.118562&partnerID=40&md5=d04192d094ac30f26261885f649723fc	Multi-objective optimization; S-CO2 cycle; T-CO2 cycle; Thermodynamic and economic performances; Waste heat recovery	English	Article	Final		Scopus	2-s2.0-85089810206
Zhang M., Liu W., Qu Q., Ke M., Zhang Z., Zhou Z., Lu T., Qian H.	57217048696;57204393949;57201316108;57195547740;57194409451;7406098824;57224080283;35235046800;	Metabolomic modulations in a freshwater microbial community exposed to the fungicide azoxystrobin	2020	Journal of Environmental Sciences (China)	6	10.1016/j.jes.2020.04.013	https://www.scopus.com/inward/record.uri?eid=2-s2.0-85085918519&doi=10.1016%2fj.jes.2020.04.013&partnerID=40&md5=bcb02b1dc887f7b6c7b25c085395055e	Aquatic microbial community metabolomics analyses; Azoxystrobin; Cyanobacterial bloom; Microalgae	English	Article	Final		Scopus	2-s2.0-85085918519
Tian Y., Xue S., Ma Y.	57207127763;57201337223;56051679500;	Comparative analysis of bacterial community and functional species in oil reservoirs with different in situ temperatures	2020	International Microbiology	2	10.1007/s10123-020-00125-1	https://www.scopus.com/inward/record.uri?eid=2-s2.0-85084156567&doi=10.1007%2fs10123-020-00125-1&partnerID=40&md5=81f6d9a6fbd192ee746f2ffb670e61cc	16S rRNA gene sequencing; Bacterial community; Functional species; In situ temperature; Oil reservoirs	English	Article	Final		Scopus	2-s2.0-85084156567
Rachel N.M., Gieg L.M.	56971396600;6601913918;	Preserving Microbial Community Integrity in Oilfield Produced Water	2020	Frontiers in Microbiology	2	10.3389/fmicb.2020.581387	https://www.scopus.com/inward/record.uri?eid=2-s2.0-85094895358&doi=10.3389%2ffmicb.2020.581387&partnerID=40&md5=aed88a70874b39640ead0da2cb557c32	16S rRNA gene; microbial community composition; oilfield microbiology; oilfield produced water; sample preservation	English	Article	Final	All Open Access, Gold, Green	Scopus	2-s2.0-85094895358
Sidhu J.P.S., Gupta V.V.S.R., Stange C., Ho J., Harris N., Barry K., Gonzalez D., Van Nostrand J.D., Zhou J., Page D., Tiehm A., Toze S.	24281893900;7403420844;57516200600;57190396625;57218500342;7006260935;56028490400;35312783600;35235999300;7401724583;6602872302;6603541239;	Prevalence of antibiotic resistance and virulence genes in the biofilms from an aquifer recharged with stormwater	2020	Water Research	12	10.1016/j.watres.2020.116269	https://www.scopus.com/inward/record.uri?eid=2-s2.0-85089348347&doi=10.1016%2fj.watres.2020.116269&partnerID=40&md5=36247f3ad46be32f4932290b8c1a13e1	Antibiotic resistance genes; Groundwater biofilms; Managed aquifer recharge; Pathogens; Stormwater; Virulence genes	English	Article	Final		Scopus	2-s2.0-85089348347
Tüccar T., Ilhan-Sungur E., Muyzer G.	57208927154;15080713500;7004888229;	Bacterial community composition in produced water of Diyarbakır oil fields in Turkey Bacterial communities in produced waters of south-eastern Turkey reported in detail for the first time	2020	Johnson Matthey Technology Review	1	10.1595/205651320X15911723486216	https://www.scopus.com/inward/record.uri?eid=2-s2.0-85095916675&doi=10.1595%2f205651320X15911723486216&partnerID=40&md5=148ca951476c9b4ea13383f4905ffd3b		English	Article	Final	All Open Access, Gold, Green	Scopus	2-s2.0-85095916675
Yucel Z.P.K., Silbereisen A., Emingil G., Tokgoz Y., Kose T., Sorsa T., Tsilingaridis G., Bostanci N.	57219024826;57208499273;35609889700;16242290400;6701658370;56341644100;24473810600;14059543900;	Salivary biomarkers in the context of gingival inflammation in children with cystic fibrosis	2020	Journal of Periodontology	5	10.1002/JPER.19-0415	https://www.scopus.com/inward/record.uri?eid=2-s2.0-85093112959&doi=10.1002%2fJPER.19-0415&partnerID=40&md5=708174f7ed82c22c124818e28def2c12	biomarkers; calprotectin; cystic fibrosis; gingivitis; saliva; TREM-1 protein	English	Article	Final	All Open Access, Green	Scopus	2-s2.0-85093112959
Dudman J.P.R., Ferreira A.M., Gentile P., Wang X., Ribeiro R.D.C., Benning M., Dalgarno K.W.	57218530391;16068361700;24478479500;57218532581;57194054715;55661111500;6701480433;	Reliable inkjet printing of chondrocytes and MSCs using reservoir agitation	2020	Biofabrication	5	10.1088/1758-5090/aba2f8	https://www.scopus.com/inward/record.uri?eid=2-s2.0-85089422762&doi=10.1088%2f1758-5090%2faba2f8&partnerID=40&md5=10cf25076e5ab2ec99d113c4c0ad7de0	bioprinting; chondrocyte; drop-on-demand; inkjet; liquid handling; mesenchymal stromal cell	English	Article	Final	All Open Access, Hybrid Gold, Green	Scopus	2-s2.0-85089422762
Zhou L., Wang D.-W., Zhang S.-L., Tang E.-G., Lu Y.-W., Jing Y.-F., Lin D.-D., Liu Z.-L., Liu J.-F., Yang S.-Z., Zhang J., Gu J.-D., Mu B.-Z.	55710625100;55713362400;57212232829;24340130600;57209731742;57218531250;57218529862;57218528408;36096880500;8719114200;55918001900;7403129601;55509556000;	Functional microorganisms involved in the sulfur and nitrogen metabolism in production water from a high-temperature offshore petroleum reservoir	2020	International Biodeterioration and Biodegradation	4	10.1016/j.ibiod.2020.105057	https://www.scopus.com/inward/record.uri?eid=2-s2.0-85089417472&doi=10.1016%2fj.ibiod.2020.105057&partnerID=40&md5=fd8c3949fd6f942979ca54408e8d6166	Denitrifier; Functional gene; Nitrate-reducing bacteria; Offshore petroleum reservoir; Sulfate-reducing prokaryote; Sulfur-oxidizing prokaryote	English	Article	Final		Scopus	2-s2.0-85089417472
Andalib N., Kehtari M., Seyedjafari E., Motamed N., Matin M.M.	57217009039;57151279300;25936739700;24335673900;7006284926;	Improved efficacy of bio-mineralization of human mesenchymal stem cells on modified PLLA nanofibers coated with bioactive materials via enhanced expression of integrin α2β1	2020	Polymers for Advanced Technologies	3	10.1002/pat.4952	https://www.scopus.com/inward/record.uri?eid=2-s2.0-85085704405&doi=10.1002%2fpat.4952&partnerID=40&md5=85aed7aafd97383d5c9bf4a21c703b68	bone tissue engineering; human bone marrow mesenchymal stem cells; integrin α2β1; nanofibrous scaffold; osteogenic differentiation; topography	English	Article	Final		Scopus	2-s2.0-85085704405
Pringault O., Bouvy M., Carre C., Fouilland E., Meddeb M., Mejri K., Leboulanger C., Sakka Hlaili A.	6603444852;7005167275;35745447800;6602597131;57211040724;57208485045;6701742650;13409805000;	Impacts of chemical contamination on bacterio-phytoplankton coupling	2020	Chemosphere	8	10.1016/j.chemosphere.2020.127165	https://www.scopus.com/inward/record.uri?eid=2-s2.0-85085325174&doi=10.1016%2fj.chemosphere.2020.127165&partnerID=40&md5=b9ae578719490a7a46da0c3fd5e4475a	Bacterial carbon demand; Carbon cycle; Pesticides; Primary production; Trace metallic elements	English	Article	Final	All Open Access, Bronze, Green	Scopus	2-s2.0-85085325174
Bowden S.A., Mohamed A.Y., Edilbi A.N.F., Lin Y.-S., Morono Y., Hinrichs K.-U., Inagaki F.	24735610700;7402739278;56595168900;8568648700;6506644061;56219344300;7103270976;	Modelling the Shimokita deep coalbed biosphere over deep geological time: Starvation, stimulation, material balance and population models	2020	Basin Research	1	10.1111/bre.12399	https://www.scopus.com/inward/record.uri?eid=2-s2.0-85071774857&doi=10.1111%2fbre.12399&partnerID=40&md5=d53a0b66816002e3bdcff850d508ba8a	basin modelling; biodegredation; deep biosphere; Integrated Ocean Drilling Program; IODP 337; Shimokita coal; subduction related basin	English	Article	Final	All Open Access, Green	Scopus	2-s2.0-85071774857
Niu J.-J., Liu Q., Peng B.	57216615756;56118049500;57189223479;	Research status of technology for obtaining methane by biotransformation of CO2 geologically stored in oil reservoirs [油藏地质封存中CO2生物转化CH4的资源化利用技术研究现状]	2020	Xiandai Huagong/Modern Chemical Industry		10.16606/j.cnki.issn0253-4320.2020.09.007	https://www.scopus.com/inward/record.uri?eid=2-s2.0-85091038811&doi=10.16606%2fj.cnki.issn0253-4320.2020.09.007&partnerID=40&md5=4a9df187f7283d33b22782b4a6b462f3	Bioconversion and biotransformation of CO2; CO2 sequestration; Methanation; Methanogens; Oil reservoir	Chinese	Article	Final		Scopus	2-s2.0-85091038811
Morón-López J., Nieto-Reyes L., Molina S., Lezcano M.Á.	55887121500;57194399846;37112705000;55889145900;	Exploring microcystin-degrading bacteria thriving on recycled membranes during a cyanobacterial bloom	2020	Science of the Total Environment	9	10.1016/j.scitotenv.2020.139672	https://www.scopus.com/inward/record.uri?eid=2-s2.0-85085735218&doi=10.1016%2fj.scitotenv.2020.139672&partnerID=40&md5=260380953eed231797eed8b0d02972f8	Bacterial community composition; Biofilm; Discarded membranes; High-throughput sequencing; Microcystin; mlr genes	English	Article	Final		Scopus	2-s2.0-85085735218
Krolicka A., Gomiero A., Baussant T.	56441392500;9737647600;35232389300;	qPCR-based assessment of microfaunal indicators of oil for monitoring benthos around oil and gas platforms	2020	Science of the Total Environment	5	10.1016/j.scitotenv.2020.139527	https://www.scopus.com/inward/record.uri?eid=2-s2.0-85085649942&doi=10.1016%2fj.scitotenv.2020.139527&partnerID=40&md5=02ddc1be6a8911f873360bd25974bcb4	Biological indicators; Metabarcoding; Oil pollution; qPCR; Sediments	English	Article	Final		Scopus	2-s2.0-85085649942
Christman G.D., León-Zayas R.I., Summers Z.M., Biddle J.F.	14046718600;57000430800;36698477800;12775385800;	Methanogens Within a High Salinity Oil Reservoir From the Gulf of Mexico	2020	Frontiers in Microbiology	2	10.3389/fmicb.2020.570714	https://www.scopus.com/inward/record.uri?eid=2-s2.0-85091930323&doi=10.3389%2ffmicb.2020.570714&partnerID=40&md5=9d9e13d4b8ff9cf14a4b280deb49878a	Archaea; metagenomics; methanogen; methanol; oil reservoir	English	Article	Final	All Open Access, Gold, Green	Scopus	2-s2.0-85091930323
Hidalgo K.J., Sierra-Garcia I.N., Dellagnezze B.M., de Oliveira V.M.	57210707090;56070997300;36542157500;35611272000;	Metagenomic Insights Into the Mechanisms for Biodegradation of Polycyclic Aromatic Hydrocarbons in the Oil Supply Chain	2020	Frontiers in Microbiology	25	10.3389/fmicb.2020.561506	https://www.scopus.com/inward/record.uri?eid=2-s2.0-85091923026&doi=10.3389%2ffmicb.2020.561506&partnerID=40&md5=23468c10f32eb91ed8c996fd9da5496a	bioremediation; groundwater; oils reservoirs; PAH; sea water	English	Review	Final	All Open Access, Gold, Green	Scopus	2-s2.0-85091923026
Gałązka A., Grządziel J., Gałązka R., Gawryjołek K., Ukalska-Jaruga A., Smreczak B.	55226306800;56376993900;54947148100;57188683782;57188750195;56026917800;	Fungal Community, Metabolic Diversity, and Glomalin-Related Soil Proteins (GRSP) Content in Soil Contaminated With Crude Oil After Long-Term Natural Bioremediation	2020	Frontiers in Microbiology	13	10.3389/fmicb.2020.572314	https://www.scopus.com/inward/record.uri?eid=2-s2.0-85091903422&doi=10.3389%2ffmicb.2020.572314&partnerID=40&md5=7fbfedc66ef1ade81d214f30a2f553b3	Biolog FFPlates; fungal community; genetic diversity; glomalin-related soil proteins; ITS gene region; metabolic profiles; NGS	English	Article	Final	All Open Access, Gold, Green	Scopus	2-s2.0-85091903422
Zhu T., Li R., Sun J., Cui Y., Wu B.	57214727307;57207203201;57216892420;55546092900;55468145100;	Characterization and efficient production of a thermostable, halostable and organic solvent-stable cellulase from an oil reservoir	2020	International Journal of Biological Macromolecules	10	10.1016/j.ijbiomac.2020.05.021	https://www.scopus.com/inward/record.uri?eid=2-s2.0-85085193326&doi=10.1016%2fj.ijbiomac.2020.05.021&partnerID=40&md5=b239a5d42bbdd834acbd4db2c0f2ce2f	Cellulase; Extremophiles; Halostable; Organic solvent-stable; Thermostable	English	Article	Final		Scopus	2-s2.0-85085193326
Mahmood B.S.	56111974000;	Silver nanoparticles and their role in gene expression of motility gene motB and repression of AI-2-controlled gene	2020	Baghdad Science Journal		10.21123/BSJ.2020.17.3(SUPPL.).0916	https://www.scopus.com/inward/record.uri?eid=2-s2.0-85092003714&doi=10.21123%2fBSJ.2020.17.3%28SUPPL.%29.0916&partnerID=40&md5=3a07c2c951269846d6baf26ce1b2880c	AI2; Motility genes; Nanoparticles; SAM assay; UPEC	English	Article	Final	All Open Access, Gold	Scopus	2-s2.0-85092003714
Adlan N.A., Sabri S., Masomian M., Ali M.S.M., Rahman R.N.Z.R.A.	57219147414;35389513200;34168157000;36631442700;57196001267;	Microbial Biodegradation of Paraffin Wax in Malaysian Crude Oil Mediated by Degradative Enzymes	2020	Frontiers in Microbiology	15	10.3389/fmicb.2020.565608	https://www.scopus.com/inward/record.uri?eid=2-s2.0-85091404185&doi=10.3389%2ffmicb.2020.565608&partnerID=40&md5=df66866306dc32e9e3a35ac636360392	alcohol dehydrogenase; alkane monooxygenase; biodegradation; crude oil; esterase; lipase; paraffin wax; thermophilic bacteria	English	Article	Final	All Open Access, Gold, Green	Scopus	2-s2.0-85091404185
Hu J., Guo L., Sun G., Wu X., Song Y., Lin J., Wang W., Cao Y., Wang Z.	57161319000;27667677700;56599511100;55850643800;7404920033;56331723200;56969961600;27171578500;55356815600;	Relationship between the growth and metabolism of indigenous microorganisms and oil displacement efficiency during dynamic displacement [动态驱替内源微生物生长代谢与驱油效率关系]	2020	Shiyou Xuebao/Acta Petrolei Sinica		10.7623/syxb202009009	https://www.scopus.com/inward/record.uri?eid=2-s2.0-85094135101&doi=10.7623%2fsyxb202009009&partnerID=40&md5=e641d5edae8acd4983066a138269061e	Growth and metabolism laws; Indigenous microbial community; Indigenous microbial flooding; Oil displacement efficiency; Three-dimensional physical simulation	Chinese	Article	Final		Scopus	2-s2.0-85094135101
Liu Y.-F., Chen J., Liu Z.-L., Shou L.-B., Lin D.-D., Zhou L., Yang S.-Z., Liu J.-F., Li W., Gu J.-D., Mu B.-Z.	57285027300;57208251789;57218528408;57209295757;57218529862;55710625100;8719114200;36096880500;57211198844;7403129601;55509556000;	Anaerobic Degradation of Paraffins by Thermophilic Actinobacteria under Methanogenic Conditions	2020	Environmental Science and Technology	24	10.1021/acs.est.0c02071	https://www.scopus.com/inward/record.uri?eid=2-s2.0-85090177169&doi=10.1021%2facs.est.0c02071&partnerID=40&md5=3c6860f4c8354fafb5972ccd28c41ed4		English	Article	Final		Scopus	2-s2.0-85090177169
Liu J.-F., Lu Y.-W., Liu X.-B., Li B.-G., Sun Y.-F., Zhou L., Liu Y.-F., Yang S.-Z., Gu J.-D., Mu B.-Z.	36096880500;57209731742;55717368400;15837060900;57217480007;55710625100;57285027300;8719114200;7403129601;55509556000;	Dominance of Pseudomonas in bacterial community and inhibition of fumarate addition pathway by injection of nutrients in oil reservoir revealed by functional gene and their transcript analyses	2020	International Biodeterioration and Biodegradation	6	10.1016/j.ibiod.2020.105039	https://www.scopus.com/inward/record.uri?eid=2-s2.0-85087284993&doi=10.1016%2fj.ibiod.2020.105039&partnerID=40&md5=9de94a2dadccb73a1ac9526c4729d7a3	Evolution; Functional gene; Microbial composition; Nutrient injection; Oil reservoir; Transcripts	English	Article	Final		Scopus	2-s2.0-85087284993
Dong J., Zhao D., Zhang C., Cao Q., Fang J., Yang R., Ji S., Li C., Zhao R., Liu J.	57216151399;57210196223;57189373973;56653178100;57200639438;57194507289;57210196833;57210191412;57210195702;55141596200;	Factors controlling organic carbon distributions in a riverine wetland	2020	Environmental Science and Pollution Research	8	10.1007/s11356-020-09685-1	https://www.scopus.com/inward/record.uri?eid=2-s2.0-85086705041&doi=10.1007%2fs11356-020-09685-1&partnerID=40&md5=75b7d560d72de74a3f5ff2bf2bff267c	Controlling factors; Dissolved organic carbon; Heavy fraction organic carbon; Light fraction organic carbon; Riverine wetland; Weighted abundance of related microbes	English	Article	Final		Scopus	2-s2.0-85086705041
Song J., Huo Z., Fu G., Hu M., Sun T., Liu Z., Wang W., Liu L.	36086684900;55588452300;55611874400;57705640800;54684983800;56004098000;57784685200;8059514800;	Petroleum migration and accumulation in the Liuchu area of Raoyang Sag, Bohai Bay Basin, China	2020	Journal of Petroleum Science and Engineering	6	10.1016/j.petrol.2020.107276	https://www.scopus.com/inward/record.uri?eid=2-s2.0-85083715104&doi=10.1016%2fj.petrol.2020.107276&partnerID=40&md5=22d6c348c12c8ada42931a7ef266a19c	Biomarkers; Migration and accumulation modeling; Migration direction; Physical characteristics of crude oil; Vertical migration	English	Article	Final		Scopus	2-s2.0-85083715104
Santos Oliveira C., Tenório C.C.A., Prudêncio R.B.C.	57219553473;57219230009;6602721735;	Item response theory to estimate the latent ability of speech synthesizers	2020	Frontiers in Artificial Intelligence and Applications	1	10.3233/FAIA200304	https://www.scopus.com/inward/record.uri?eid=2-s2.0-85091770587&doi=10.3233%2fFAIA200304&partnerID=40&md5=46c89652293cea9eb93da40652c59051		English	Conference Paper	Final		Scopus	2-s2.0-85091770587
Rathour R., Gupta J., Mishra A., Rajeev A.C., Dupont C.L., Thakur I.S.	57195643693;57213890062;57199851409;57201215999;7201415188;6603753283;	A comparative metagenomic study reveals microbial diversity and their role in the biogeochemical cycling of Pangong lake	2020	Science of the Total Environment	40	10.1016/j.scitotenv.2020.139074	https://www.scopus.com/inward/record.uri?eid=2-s2.0-85084539587&doi=10.1016%2fj.scitotenv.2020.139074&partnerID=40&md5=2fcd3121fc717f541894b832fe75a6d4	Extremophiles; Metagenomics; Methane metabolism; Pangong lake; Proteobacteria; Xenobiotic degradation	English	Article	Final		Scopus	2-s2.0-85084539587
Huang W., Du Y., Ren H., Guo J., Wang R., Wang Z., Zhao L., Hao Z.	57207277930;57216671870;57216671318;57191228115;57216674404;57216673394;57216673201;57684449200;	Application of modified GMDH network for CO2-oil minimum miscibility pressure prediction	2020	Energy Sources, Part A: Recovery, Utilization and Environmental Effects	2	10.1080/15567036.2019.1604908	https://www.scopus.com/inward/record.uri?eid=2-s2.0-85084253575&doi=10.1080%2f15567036.2019.1604908&partnerID=40&md5=4193e675855ac141ac5970688f041704	CO2 flooding; forecasting; minimum miscibility pressure; modified group method of data handling; Self-organization	English	Review	Final		Scopus	2-s2.0-85084253575
Schilcher K., Horswill A.R.	39062009000;57212852659;	Staphylococcal Biofilm Development: Structure, Regulation, and Treatment Strategies	2020	Microbiology and Molecular Biology Reviews	129	10.1128/MMBR.00026-19	https://www.scopus.com/inward/record.uri?eid=2-s2.0-85089536228&doi=10.1128%2fMMBR.00026-19&partnerID=40&md5=0b085a110fdbbabdbe9e7bcb8d5548c5	Biofilms; Extracellular matrix; Microbial communities; Quorum sensing; Staphylococcus aureus; Staphylococcus epidermidis	English	Review	Final	All Open Access, Green	Scopus	2-s2.0-85089536228
Zhang X.-J., Liu H.-C., Zhou Y.-G., Wu X.-L., Nie Y., Li Q.-R., Wang M.-Z., Zhao L., Cai M., Kang Y.-Q.	57216566226;12776427300;7405364058;55714869100;56526086500;56142986200;57198453799;55622309100;24922456800;15020597700;	Pseudomonas Saliphila sp. nov., a Bacterium Isolated from Oil-Well Production Water in Qinghai Oilfield of China	2020	Current Microbiology	7	10.1007/s00284-020-01986-5	https://www.scopus.com/inward/record.uri?eid=2-s2.0-85083875600&doi=10.1007%2fs00284-020-01986-5&partnerID=40&md5=7e17b59d08a46b9b62f2e5c93608a90e		English	Article	Final		Scopus	2-s2.0-85083875600
Zhang X., Wang G., Ma X., Yu J., You J., Xue Y., Ma Y.	57216511546;57218079323;57205739138;57203943322;57196002762;7402270781;7404700526;	Tepidiphilus baoligensis sp. nov., a Novel Bacterium of the Family Hydrogenophilaceae Isolated from an Oil Reservoir	2020	Current Microbiology	3	10.1007/s00284-020-01983-8	https://www.scopus.com/inward/record.uri?eid=2-s2.0-85083716452&doi=10.1007%2fs00284-020-01983-8&partnerID=40&md5=6effd3defd34afd048713974c657df69		English	Article	Final		Scopus	2-s2.0-85083716452
Tinker K., Gardiner J., Lipus D., Sarkar P., Stuckman M., Gulliver D.	57191956909;57213962117;56403233800;57218531045;42862623100;56119246600;	Geochemistry and Microbiology Predict Environmental Niches With Conditions Favoring Potential Microbial Activity in the Bakken Shale	2020	Frontiers in Microbiology	9	10.3389/fmicb.2020.01781	https://www.scopus.com/inward/record.uri?eid=2-s2.0-85089418034&doi=10.3389%2ffmicb.2020.01781&partnerID=40&md5=fc8249e40d6aea5a601a076624a40356	16S rRNA gene amplicon sequencing; Bakken Shale; hydraulic fracturing; hydrocarbon; microbiome; produced water; qPCR; unconventional	English	Article	Final	All Open Access, Gold, Green	Scopus	2-s2.0-85089418034
Repizo G.D., Espariz M., Seravalle J.L., Miloslavich J.I.D., Steimbrüch B.A., Shuman H.A., Viale A.M.	14027372900;6506737994;57211927527;57218544398;57218336365;35459274900;7006429498;	Acinetobacter baumannii NCIMB8209: A rare environmental strain displaying extensive insertion sequence-mediated genome remodeling resulting in the loss of exposed cell structures and defensive mechanisms	2020	mSphere	5	10.1128/MSPHERE.00404-20	https://www.scopus.com/inward/record.uri?eid=2-s2.0-85088851957&doi=10.1128%2fMSPHERE.00404-20&partnerID=40&md5=04cebd5828f8fa52e3de8d5a295a80a5	Comparative genomics; Environmental acinetobacter baumannii; Environmental reservoirs; Insertion sequences; Preantibiotic-era acinetobacter baumannii; Virulence factors	English	Article	Final	All Open Access, Green	Scopus	2-s2.0-85088851957
Gamage C.D., Sato Y., Kimura R., Yamashiro T., Toma C.	35867068300;23393502000;7201883169;7005921426;57210368337;	Understanding leptospirosis ecoepidemiology by environmental dna metabarcoding of irrigation water from two agro-ecological regions of Sri Lanka	2020	PLoS Neglected Tropical Diseases	9	10.1371/journal.pntd.0008437	https://www.scopus.com/inward/record.uri?eid=2-s2.0-85088520248&doi=10.1371%2fjournal.pntd.0008437&partnerID=40&md5=515640e7f7aaa394b320c2c009e39743		English	Article	Final	All Open Access, Gold, Green	Scopus	2-s2.0-85088520248
Shlimon A.G., Mansurbeg H., Othman R.S., Gittel A., Aitken C.M., Head I.M., Finster K.W., Kjeldsen K.U.	6504705563;13004152000;7003407403;23484769100;7004998526;7004835395;7003459101;8979785400;	Microbial Community Composition in Crude Oils and Asphalts from the Kurdistan Region of Iraq	2020	Geomicrobiology Journal	11	10.1080/01490451.2020.1753131	https://www.scopus.com/inward/record.uri?eid=2-s2.0-85084368869&doi=10.1080%2f01490451.2020.1753131&partnerID=40&md5=67dd67f4dff0fba77328261b1383097d	16S rRNA; Asphalt; bacteria; biodegradation; bssA; crude oil	English	Article	Final	All Open Access, Green	Scopus	2-s2.0-85084368869
Zhou L., Lu Y.-W., Wang D.-W., Zhang S.-L., Tang E.-G., Qi Z.-Z., Xie S.-N., Wu J., Liang B., Liu J.-F., Yang S.-Z., Zhang J., Gu J.-D., Mu B.-Z.	55710625100;57209731742;55713362400;57212232829;24340130600;57209293288;57216500637;57216502441;56708020300;36096880500;8719114200;55918001900;7403129601;55509556000;	Microbial community composition and diversity in production water of a high-temperature offshore oil reservoir assessed by DNA- and RNA-based analyses	2020	International Biodeterioration and Biodegradation	17	10.1016/j.ibiod.2020.104970	https://www.scopus.com/inward/record.uri?eid=2-s2.0-85083714092&doi=10.1016%2fj.ibiod.2020.104970&partnerID=40&md5=a93f9afcfef4d6b76889d033f2f789e0	16S rRNA sequencing; Active community; DNA- and RNA-Based; Microbial community; Offshore petroleum reservoir	English	Article	Final		Scopus	2-s2.0-85083714092
Santos J.C.D., Lopes D.R.G., Da Silva J.D., De Oliveira M.D., Dias R.S., Lima H.S., De Sousa M.P., De Paula S.O., Silva C.C.D.	57210527839;57191845881;57208154117;55446690200;55324737500;57191866363;56012324700;6603011411;55324027700;	Diversity of sulfate-reducing prokaryotes in petroleum production water and oil samples	2020	International Biodeterioration and Biodegradation	11	10.1016/j.ibiod.2020.104966	https://www.scopus.com/inward/record.uri?eid=2-s2.0-85083419446&doi=10.1016%2fj.ibiod.2020.104966&partnerID=40&md5=d53dc73f97f0d66e7839e0b5ee07846d	16S rRNA; Biocorrosion; Biosourcing; Functional prediction; Petroleum reservoir	English	Article	Final		Scopus	2-s2.0-85083419446
Watanabe M., Kojima H., Fukui M.	55601950900;7402684286;7402501816;	Aerosticca soli gen. nov., sp. nov., an aerobic gammaproteobacterium isolated from crude oil-contaminated soil	2020	Archives of Microbiology	3	10.1007/s00203-020-01819-w	https://www.scopus.com/inward/record.uri?eid=2-s2.0-85079050128&doi=10.1007%2fs00203-020-01819-w&partnerID=40&md5=4b5edcc1de9ef33a32ba3a2d683c706c	Gammaproteobacteria; Moderate thermophile; Novel genus; Oilfield soil; Rhodanobacteraceae; Thermotolerance	English	Article	Final		Scopus	2-s2.0-85079050128
Guo X.-F., Tong W.-F., Ruan Y., Sinclair A.J., Li D.	57077291200;57211913893;57211192119;7202756400;36682605000;	Different metabolism of EPA, DPA and DHA in humans: A double-blind cross-over study	2020	Prostaglandins Leukotrienes and Essential Fatty Acids	20	10.1016/j.plefa.2019.102033	https://www.scopus.com/inward/record.uri?eid=2-s2.0-85075369514&doi=10.1016%2fj.plefa.2019.102033&partnerID=40&md5=3d446e9c3020f651e99bb536cff4ddbb	Blood lipid fraction; Docosahexaenoic acid; Docosapentaenoic acid; Eicosapentaenoic acid; Metabolomics	English	Article	Final		Scopus	2-s2.0-85075369514
Yan L., Ji M., Jia B., Chen X., Gao P.	57192078915;57217345999;57196216237;57217346001;57217344560;	Microbial characteristics of Shunbei faulted-karst reservoirs and prediction of play fairways, Tarim Basin [塔里木盆地顺北断溶体油气藏微生物特征及有利区预测]	2020	Oil and Gas Geology	3	10.11743/ogg20200313	https://www.scopus.com/inward/record.uri?eid=2-s2.0-85087103431&doi=10.11743%2fogg20200313&partnerID=40&md5=25d5eb6f6c803726053593bd530a1584	Butane-oxidizing bacteria; Methane-oxidizing bacteria; Microbial prospecting of oil and gas; Plate culture counting method; Shunbei faulted karst; Tarim Basin	Chinese	Article	Final		Scopus	2-s2.0-85087103431
Ferguson D.K., Li C., Jiang C., Chakraborty A., Grasby S.E., Hubert C.R.J.	57215698082;55857469000;7403665254;57201381582;6603882582;7005155531;	Natural attenuation of spilled crude oil by cold-adapted soil bacterial communities at a decommissioned High Arctic oil well site	2020	Science of the Total Environment	17	10.1016/j.scitotenv.2020.137258	https://www.scopus.com/inward/record.uri?eid=2-s2.0-85081666477&doi=10.1016%2fj.scitotenv.2020.137258&partnerID=40&md5=cf3a9efae12ba31bb4f7da1378e52665	Contaminated soil; DNA sequencing; High Arctic; Natural attenuation; Oil geochemistry; Oil spill	English	Article	Final		Scopus	2-s2.0-85081666477
Barth S.A., Weber M., Schaufler K., Berens C., Geue L., Menge C.	7006165580;56587429100;55653094200;6603683529;26643318300;7003305420;	Metabolic traits of bovine shiga toxin-producing escherichia coli (STEC) strains with different colonization properties	2020	Toxins	2	10.3390/toxins12060414	https://www.scopus.com/inward/record.uri?eid=2-s2.0-85087099025&doi=10.3390%2ftoxins12060414&partnerID=40&md5=98839a7980b7ff3aef183f402a343f5d	Acid resistance; Biofilm; Bovine; Colonization type; Metabolic activity; Omnilog; Reservoir; Shiga toxin-producing Escherichia coli; STEC	English	Article	Final	All Open Access, Gold, Green	Scopus	2-s2.0-85087099025
Ślęzak P., Śmiga M., Smalley J.W., Siemińska K., Olczak T.	57214362011;56418613900;7006867931;57214362814;6603802243;	Porphyromonas gingivalis hmuy and streptococcus gordonii gapdh—novel heme acquisition strategy in the oral microbiome	2020	International Journal of Molecular Sciences	3	10.3390/ijms21114150	https://www.scopus.com/inward/record.uri?eid=2-s2.0-85086371120&doi=10.3390%2fijms21114150&partnerID=40&md5=028d1578308133f4035b8ec179faad22	GAPDH; Heme; HmuY; Microbiome; Periodontitis; Porphyromonas gingivalis; Streptococcus gordonii	English	Article	Final	All Open Access, Gold, Green	Scopus	2-s2.0-85086371120
Minich J.J., Poore G.D., Jantawongsri K., Johnston C., Bowie K., Bowman J., Knight R., Nowak B., Allen E.E.	55889086300;56270667400;56509556000;57217786267;57190670026;7401849908;57211119310;7102813995;7202717583;	Microbial ecology of atlantic salmon (Salmo salar) hatcheries: Impacts of the built environment on fish mucosal microbiota	2020	Applied and Environmental Microbiology	30	10.1128/AEM.00411-20	https://www.scopus.com/inward/record.uri?eid=2-s2.0-85085905151&doi=10.1128%2fAEM.00411-20&partnerID=40&md5=3a78256a88c003f93c14e7c9b22760b4	16S; Aquaculture; Built environment; Environmental microbiology; Microbial ecology; Microbiome	English	Article	Final	All Open Access, Green	Scopus	2-s2.0-85085905151
Pannekens M., Voskuhl L., Meier A., Müller H., Haque S., Frösler J., Brauer V.S., Meckenstock R.U.	57204874465;57216912303;57216912574;57188873374;14035388800;39461302700;16041675600;7005916698;	Densely populated water droplets in heavy-oil seeps	2020	Applied and Environmental Microbiology	7	10.1128/AEM.00164-20	https://www.scopus.com/inward/record.uri?eid=2-s2.0-85085264588&doi=10.1128%2fAEM.00164-20&partnerID=40&md5=659c5b2839c8691c427fc53ba95423ed	16S rRNA sequencing; Active degradation; Bitumen; Core community; Life in oil; Microhabitat; Oil degradation; Oil reservoir	English	Article	Final	All Open Access, Hybrid Gold, Green	Scopus	2-s2.0-85085264588
Hassani Mokarram N., Mosaffa A.H.	57216362550;36625820300;	Investigation of the thermoeconomic improvement of integrating enhanced geothermal single flash with transcritical organic Rankine cycle	2020	Energy Conversion and Management	23	10.1016/j.enconman.2020.112831	https://www.scopus.com/inward/record.uri?eid=2-s2.0-85083302324&doi=10.1016%2fj.enconman.2020.112831&partnerID=40&md5=eac29def2a5a79a489ea04cec44891d9	Enhanced geothermal flash cycle; Heat transfer area; Thermoeconomic analysis; Transcritical organic Rankine cycle	English	Article	Final		Scopus	2-s2.0-85083302324
Salgar-Chaparro S.J., Lepkova K., Pojtanabuntoeng T., Darwin A., Machuca L.L.	57090962300;8582682700;42262609500;36174873500;43861654600;	Microbiologically influenced corrosion as a function of environmental conditions: A laboratory study using oilfield multispecies biofilms	2020	Corrosion Science	12	10.1016/j.corsci.2020.108595	https://www.scopus.com/inward/record.uri?eid=2-s2.0-85082409916&doi=10.1016%2fj.corsci.2020.108595&partnerID=40&md5=1cba0c8cd356baf006159bf6ae750e40	A. Carbon steel; B. 16S rRNA gene sequencing; B. SEM; C. Localised corrosion; C. Microbiological corrosion	English	Article	Final		Scopus	2-s2.0-85082409916
Mahdaviara M., Menad N.A., Ghazanfari M.H., Hemmati-Sarapardeh A.	57214839505;57203039467;17343673900;55556311300;	Modeling relative permeability of gas condensate reservoirs: Advanced computational frameworks	2020	Journal of Petroleum Science and Engineering	19	10.1016/j.petrol.2020.106929	https://www.scopus.com/inward/record.uri?eid=2-s2.0-85079281169&doi=10.1016%2fj.petrol.2020.106929&partnerID=40&md5=bba6f74dc99c35428125ccab37bcae4c	Artificial intelligence; Comprehensive modeling; Empirical correlation; Gas condensate; Relative permeability	English	Article	Final		Scopus	2-s2.0-85079281169
Li Y., Tang S., Zhang S., Xi Z.	57192531176;23006693800;35108658100;57193616328;	In Situ Analysis of Methanogenic Pathways and Biogeochemical Features of CBM Co-produced Water from the Shizhuangnan Block in the Southern Qinshui Basin, China	2020	Energy and Fuels	9	10.1021/acs.energyfuels.9b04351	https://www.scopus.com/inward/record.uri?eid=2-s2.0-85090714261&doi=10.1021%2facs.energyfuels.9b04351&partnerID=40&md5=5e8bd36e697a70c15297df2da76c85e4		English	Article	Final		Scopus	2-s2.0-85090714261
Li C.-C., Wang L.-S., Tang H.-J., Zhang H.-B.	57217868048;36173423100;23020367200;57193433663;	Seasonal variation and reserves estimation of particulate organic carbon (POC) in the central Bohai Sea [渤海中部海域颗粒有机碳季节性变化及碳库估算]	2020	Zhongguo Huanjing Kexue/China Environmental Science	1		https://www.scopus.com/inward/record.uri?eid=2-s2.0-85087760379&partnerID=40&md5=32149ee4829ffdc2da9a251886b0a447	Bohai Sea; Carbon pool; Different seasons; Distribution; POC	Chinese	Article	Final		Scopus	2-s2.0-85087760379
Zhang J., Gao H., Xue Q.	56518589500;56518668200;7201986356;	Potential applications of microbial enhanced oil recovery to heavy oil	2020	Critical Reviews in Biotechnology	25	10.1080/07388551.2020.1739618	https://www.scopus.com/inward/record.uri?eid=2-s2.0-85081730966&doi=10.1080%2f07388551.2020.1739618&partnerID=40&md5=c816020324353fc6259e6bef9f155264	field trials; Heavy oil; laboratory experiments; microbial enhanced oil recovery; novel biotechnological process; oil recovery mechanism	English	Review	Final		Scopus	2-s2.0-85081730966
Mahdaviara M., Rostami A., Shahbazi K.	57214839505;57188924492;14061246600;	State-of-the-art modeling permeability of the heterogeneous carbonate oil reservoirs using robust computational approaches	2020	Fuel	20	10.1016/j.fuel.2020.117389	https://www.scopus.com/inward/record.uri?eid=2-s2.0-85079890157&doi=10.1016%2fj.fuel.2020.117389&partnerID=40&md5=9b43901c54771f65ada604fe24aeb480	Empirically derived models; Gene Expression Programming (GEP); Group Method of Data Handling (GMDH); Heterogeneous carbonate reservoirs; Outliers detection; Permeability	English	Article	Final		Scopus	2-s2.0-85079890157
Li H., Lai R., Jin Y., Fang X., Cui K., Sun S., Gong Y., Li H., Zhang Z., Zhang G., Zhang Z.	57213976230;57202548856;57214093700;57214092724;57202945206;23111564700;57201000605;57214093297;55721716800;55738987500;56342911700;	Directional culture of petroleum hydrocarbon degrading bacteria for enhancing crude oil recovery	2020	Journal of Hazardous Materials	10	10.1016/j.jhazmat.2020.122160	https://www.scopus.com/inward/record.uri?eid=2-s2.0-85078214986&doi=10.1016%2fj.jhazmat.2020.122160&partnerID=40&md5=7f6e1ffbecc35d3f3f075687d1131d95	Arcobacter; Bacillus; Microbial community; Microbial enhanced oil recovery; Nutrients	English	Article	Final		Scopus	2-s2.0-85078214986
Ageorges V., Monteiro R., Leroy S., Burgess C.M., Pizza M., Chaucheyras-Durand F., Desvaux M.	57212093748;54944739600;8544545100;9237531400;57074968900;6508016812;6701860653;	Molecular determinants of surface colonisation in diarrhoeagenic Escherichia coli (DEC): From bacterial adhesion to biofilm formation	2020	FEMS Microbiology Reviews	22	10.1093/femsre/fuaa008	https://www.scopus.com/inward/record.uri?eid=2-s2.0-85087467047&doi=10.1093%2ffemsre%2ffuaa008&partnerID=40&md5=b03a4f10c23975ea67b86596e58d3b4a	Bacterial adhesion; Biofilm formation; Exopolymers; Pathogenic Escherichia coli; Surface colonisation; Surface proteins	English	Review	Final	All Open Access, Green	Scopus	2-s2.0-85087467047
de Paulo Ferreira L., Surmas R., Tonietto S.N., da Silva M.A.P., Peçanha R.P.	57215818663;6507610018;52364955700;57125367700;6603137799;	Modeling reactive flow on carbonates with realistic porosity and permeability fields	2020	Advances in Water Resources	6	10.1016/j.advwatres.2020.103564	https://www.scopus.com/inward/record.uri?eid=2-s2.0-85081949061&doi=10.1016%2fj.advwatres.2020.103564&partnerID=40&md5=91d0818f559201f46ff5b622aa702929	Carbonates; Digital rock physics; OpenFOAM; Reactive flow modeling; Two-scale continuum model	English	Article	Final		Scopus	2-s2.0-85081949061
Suárez P., Gutiérrez A.V., Salazar V., Puche M.L., Serrano Y., Martínez S., González G., Fernández-Delgado M.	7006063795;57215809190;7003371102;57215597869;57215602795;57216142913;7202571211;23134364000;	Virulence properties and antimicrobial resistance of Pseudomonas aeruginosa isolated from cave waters at Roraima Tepui, Guayana Highlands	2020	Letters in Applied Microbiology	3	10.1111/lam.13283	https://www.scopus.com/inward/record.uri?eid=2-s2.0-85081291466&doi=10.1111%2flam.13283&partnerID=40&md5=d0d3ee341fd32d7d4d07a7dd41d21794	biofilms; Pseudomonads; resistance; virulence; water	English	Article	Final		Scopus	2-s2.0-85081291466
Sierra-Garcia I.N., Belgini D.R.B., Torres-Ballesteros A., Paez-Espino D., Capilla R., Santos Neto E.V., Gray N., de Oliveira V.M.	56070997300;36994478600;57192299693;25932136900;37016183100;6506610148;7201699211;35611272000;	In depth metagenomic analysis in contrasting oil wells reveals syntrophic bacterial and archaeal associations for oil biodegradation in petroleum reservoirs	2020	Science of the Total Environment	15	10.1016/j.scitotenv.2020.136646	https://www.scopus.com/inward/record.uri?eid=2-s2.0-85078664693&doi=10.1016%2fj.scitotenv.2020.136646&partnerID=40&md5=03853ba5fd94ab630c5b172a78cf73bd	Biodegradation; Hydrocarbons; Metagenomics; Microbiome; Syntrophism	English	Article	Final		Scopus	2-s2.0-85078664693
Lahme S., Callbeck C.M., Eland L.E., Wipat A., Enning D., Head I.M., Hubert C.R.J.	54901378900;47160948600;55320563000;6602761323;37664756300;7004835395;7005155531;	Comparison of sulfide-oxidizing Sulfurimonas strains reveals a new mode of thiosulfate formation in subsurface environments	2020	Environmental Microbiology	14	10.1111/1462-2920.14894	https://www.scopus.com/inward/record.uri?eid=2-s2.0-85078594029&doi=10.1111%2f1462-2920.14894&partnerID=40&md5=3f3280903a63a9dc3f622dfcfc3699dd		English	Article	Final		Scopus	2-s2.0-85078594029
Artal M.C., Pereira K.D., Luchessi A.D., Okura V.K., Henry T.B., Marques-Souza H., de Aragão Umbuzeiro G.	55601629800;57190069418;57190022161;6506734831;7102043557;14056688500;6506130489;	Transcriptome analysis in Parhyale hawaiensis reveal sex-specific responses to AgNP and AgCl exposure	2020	Environmental Pollution	10	10.1016/j.envpol.2020.113963	https://www.scopus.com/inward/record.uri?eid=2-s2.0-85078234454&doi=10.1016%2fj.envpol.2020.113963&partnerID=40&md5=9ecb7c40b81e918ffaf191baa56a9514	Amphipod; Gene expression; Glutathione-S-Transferase; RNA-Seq; RT-qPCR	English	Article	Final		Scopus	2-s2.0-85078234454
Samelo R.R., da Cunha de Medeiros P., de Carvalho Cavalcante D.N., Aranha M.L.G., Duarte F.A., de Castro Í.B., Ribeiro D.A., Perobelli J.E.	57192832941;57204103615;57212478026;57212464076;21739086900;57194114978;7004340880;36239029900;	Low concentrations of sodium arsenite induce hepatotoxicity in prepubertal male rats	2020	Environmental Toxicology	6	10.1002/tox.22890	https://www.scopus.com/inward/record.uri?eid=2-s2.0-85076765987&doi=10.1002%2ftox.22890&partnerID=40&md5=9bfab65740a1613347072a6c9679ed06	DNA damage; kidneys; liver; rats; sodium arsenite	English	Article	Final		Scopus	2-s2.0-85076765987
Yuan Z., Druzhinina I.S., Wang X., Zhang X., Peng L., Labbé J.	44261771600;6603711142;57211558609;57205617057;57189094046;55125234500;	Insight into a highly polymorphic endophyte isolated from the roots of the halophytic seepweed Suaeda salsa: Laburnicola rhizohalophila sp. nov. (Didymosphaeriaceae, Pleosporales)	2020	Fungal Biology	10	10.1016/j.funbio.2019.10.001	https://www.scopus.com/inward/record.uri?eid=2-s2.0-85074399284&doi=10.1016%2fj.funbio.2019.10.001&partnerID=40&md5=cc9eafdffb34c9fbb0cee63834221660	Carbon utilization; Dark septate endophytes; Intraspecific polymorphism; Root-fungal mutualism	English	Article	Final	All Open Access, Green	Scopus	2-s2.0-85074399284
Medico L.D., Cerletti D., Schächle P., Christen M., Christen B.	57208279949;57090893000;57208284308;24485246900;8917621800;	The type IV pilin PilA couples surface attachment and cell-cycle initiation in Caulobacter crescentus	2020	Proceedings of the National Academy of Sciences of the United States of America	18	10.1073/pnas.1920143117	https://www.scopus.com/inward/record.uri?eid=2-s2.0-85083892073&doi=10.1073%2fpnas.1920143117&partnerID=40&md5=4eb511b3b36d8b0ac0c5f30fdf8728d7	C-di-GMP; Caulobacter crescentus; FRET microscopy; TnSeq; Type IV pilin	English	Article	Final	All Open Access, Hybrid Gold, Green	Scopus	2-s2.0-85083892073
Elufisan T.O., Luna I.C.R., Oyedara O.O., Varela A.S., García V.B., Oluyide B.O., Treviño S.F., López M.A.V., Guo X.	57190123038;57216920873;39962127000;57216926986;57216922794;57216931684;55915642100;55388331100;7404330685;	Antimicrobial susceptibility pattern of stenotrophomonas species isolated from Mexico	2020	African Health Sciences	6	10.4314/ahs.v20i1.22	https://www.scopus.com/inward/record.uri?eid=2-s2.0-85085346272&doi=10.4314%2fahs.v20i1.22&partnerID=40&md5=b53b8d0dede5a9cec3f74d032e78ed47	Anti-microbial susceptibility; Biochemical characterization; Clonal diversity; Environmental; Stenotrophomonas	English	Article	Final	All Open Access, Gold, Green	Scopus	2-s2.0-85085346272
Sun J., Yang P., Huang S., Li N., Zhang Y., Yuan Y., Lu X.	57420124800;57204942324;57213266187;57223946314;56637950300;55139390300;34168040600;	Enhanced removal of veterinary antibiotic from wastewater by photoelectroactive biofilm of purple anoxygenic phototroph through photosynthetic electron uptake	2020	Science of the Total Environment	8	10.1016/j.scitotenv.2020.136605	https://www.scopus.com/inward/record.uri?eid=2-s2.0-85077732862&doi=10.1016%2fj.scitotenv.2020.136605&partnerID=40&md5=03e99fdf4ad3ca3a711b5f2b7e5e3dc9	Antibiotic resistance gene; Degradation; Florfenicol; Photoelectroactive biofilm; Photosynthetic electron uptake; Purple anoxygenic phototroph	English	Article	Final		Scopus	2-s2.0-85077732862
Lenchi N., Kebbouche-Gana S., Servais P., Gana M.L., Llirós M.	55771612500;56527412100;7005849675;26039122200;12645566200;	Diesel Biodegradation Capacities and Biosurfactant Production in Saline-Alkaline Conditions by Delftia sp NL1, Isolated from an Algerian Oilfield	2020	Geomicrobiology Journal	3	10.1080/01490451.2020.1722769	https://www.scopus.com/inward/record.uri?eid=2-s2.0-85079127697&doi=10.1080%2f01490451.2020.1722769&partnerID=40&md5=aa5192d318fd76ede46f32af144d3a11	Biosurfactant; Delftia sp NL1; diesel; oilfield; pH; salinity	English	Article	Final		Scopus	2-s2.0-85079127697
Ertl V.M., Höring M., Schött H.-F., Blücher C., Kjølbæk L., Astrup A., Burkhardt R., Liebisch G.	57216222712;57206891028;56365060800;55308410500;56955666900;57215554218;12773987000;6701516942;	Quantification of diacylglycerol and triacylglycerol species in human fecal samples by flow injection Fourier transform mass spectrometry	2020	Analytical and Bioanalytical Chemistry	3	10.1007/s00216-020-02416-y	https://www.scopus.com/inward/record.uri?eid=2-s2.0-85082873276&doi=10.1007%2fs00216-020-02416-y&partnerID=40&md5=c6fc5a2fc043971c91fd433d25fbbdd5	Diglyceride; Feces; High-resolution mass spectrometry; Lipidomics; Microbiome; Triglyceride	English	Article	Final	All Open Access, Hybrid Gold, Green	Scopus	2-s2.0-85082873276
Monteiro F., Lemos L.S., de Moura J.F., Rocha R.C.C., Moreira I., Di Beneditto A.P.M., Kehrig H.A., Bordon I.C., Siciliano S., Saint'Pierre T.D., Hauser-Davis R.A.	57209535242;55831961200;37661243600;55241257500;7004354736;7801315373;6603181078;53163239200;35301053500;6602901601;36489568800;	Total and subcellular Ti distribution and detoxification processes in Pontoporia blainvillei and Steno bredanensis dolphins from Southeastern Brazil	2020	Marine Pollution Bulletin	4	10.1016/j.marpolbul.2020.110975	https://www.scopus.com/inward/record.uri?eid=2-s2.0-85079683999&doi=10.1016%2fj.marpolbul.2020.110975&partnerID=40&md5=ba26ac7e97cc9fd49b2b070c7a92b002	Bioavailability; Delphinids; Detoxification; Metalloproteins; TiO2 nanoparticles; Titanium	English	Article	Final		Scopus	2-s2.0-85079683999
Wang J.-W., Cai M., Nie Y., Hu B., Yang Y., Wu X.-L.	56608225200;24922456800;56526086500;57199663548;57191373014;55714869100;	Pseudomonas jilinensis sp. nov., Isolated from Oil Production Water of Jilin Oilfield in China	2020	Current Microbiology	4	10.1007/s00284-019-01798-2	https://www.scopus.com/inward/record.uri?eid=2-s2.0-85075009079&doi=10.1007%2fs00284-019-01798-2&partnerID=40&md5=6d628205296e6976f09a23ac39a02b20		English	Review	Final		Scopus	2-s2.0-85075009079
Shu W., Wang Y., Liu C., Li R., Pei C., Lou W., Lin S., Di W., Wan J.	57210597407;47761591000;57205690192;57210596382;57210604905;56519254300;57723960400;25622158800;50162885100;	Construction of a Plasmonic Chip for Metabolic Analysis in Cervical Cancer Screening and Evaluation	2020	Small Methods	47	10.1002/smtd.201900469	https://www.scopus.com/inward/record.uri?eid=2-s2.0-85071097549&doi=10.1002%2fsmtd.201900469&partnerID=40&md5=4ec2123e225003128a316d69b310938e	cancer screening; mass spectrometry; metabolites; plasmonic materials	English	Article	Final		Scopus	2-s2.0-85071097549
Kashyap D., Baral B., Verma T.P., Sonkar C., Chatterji D., Jain A.K., Jha H.C.	57215590115;57215575418;57215593715;57203501195;57215588976;57680303300;35487831000;	Oral rinses in growth inhibition and treatment of Helicobacter pylori infection	2020	BMC Microbiology	6	10.1186/s12866-020-01728-4	https://www.scopus.com/inward/record.uri?eid=2-s2.0-85081236697&doi=10.1186%2fs12866-020-01728-4&partnerID=40&md5=e6f72bf6d98c2e1455d4dff2df64866e	Apoptotic pathway; CagA; Gastric cancer; Gastritis; Growth curve; H. pylori; Oral rinses	English	Article	Final	All Open Access, Gold, Green	Scopus	2-s2.0-85081236697
Rostami A., Daneshi A., Miri R.	57188924492;57194060020;55416216100;	Proposing a rigorous empirical model for estimating the bubble point pressure in heterogeneous carbonate reservoirs	2020	Advances in Geo-Energy Research	2	10.26804/ager.2020.02.02	https://www.scopus.com/inward/record.uri?eid=2-s2.0-85091064851&doi=10.26804%2fager.2020.02.02&partnerID=40&md5=5f39b7690d1b95bb8580c8f0ee23ec04	Bubble point pressure; Comprehensive error analysis; Correlation; Gene expression programming; Sensitivity analysis	English	Article	Final	All Open Access, Gold	Scopus	2-s2.0-85091064851
Salgar-Chaparro S.J., Lepkova K., Pojtanabuntoeng T., Darwin A., Machuca L.L.	57090962300;8582682700;42262609500;36174873500;43861654600;	Nutrient level determines biofilm characteristics and subsequent impact on microbial corrosion and biocide effectiveness	2020	Applied and Environmental Microbiology	32	10.1128/AEM.02885-19	https://www.scopus.com/inward/record.uri?eid=2-s2.0-85082094458&doi=10.1128%2fAEM.02885-19&partnerID=40&md5=dea9432f457b0829ef5ed88179d1876e	16S rRNA; Biocide; Biofilms; Carbon steel; Microbial activity; Microbiologically influenced corrosion; Nutrient level	English	Article	Final	All Open Access, Hybrid Gold, Green	Scopus	2-s2.0-85082094458
Esene C., Zendehboudi S., Shiri H., Aborig A.	57202470198;37014087800;53881892500;57202470453;	Deterministic tools to predict recovery performance of carbonated water injection	2020	Journal of Molecular Liquids	16	10.1016/j.molliq.2019.111911	https://www.scopus.com/inward/record.uri?eid=2-s2.0-85078888957&doi=10.1016%2fj.molliq.2019.111911&partnerID=40&md5=a8407a595cbcb42483a35a8cf112e3d7	Carbonated water injection; Optimization; Prediction tools; Recovery factor; Sensitivity analysis	English	Article	Final		Scopus	2-s2.0-85078888957
Perry A.M., Hernday A.D., Nobile C.J.	57203035212;6507663811;8664518700;	Unraveling how candida albicans forms sexual biofilms	2020	Journal of Fungi	8	10.3390/jof6010014	https://www.scopus.com/inward/record.uri?eid=2-s2.0-85078499182&doi=10.3390%2fjof6010014&partnerID=40&md5=9b0f5b865777a8bff3857f748fe7e7f9	Biofilm development; Biofilm formation; Biofilms; Candida albicans; Mating type-like (MTL) locus; Opaque cell; Phenotypic states; Pheromone signaling; Pheromone-induced biofilms; Sexual biofilms; White cell	English	Review	Final	All Open Access, Gold, Green	Scopus	2-s2.0-85078499182
Yadav A., Vilcáez J., Farag I.F., Johnson B., Mueller K., Youssef N.H., Elshahed M.S.	57214121677;16305969800;56114387500;57204472131;57200420086;10044729100;55907765000;	Candidatus Mcinerneyibacterium aminivorans gen. nov., sp. nov., the first representative of the candidate phylum Mcinerneyibacteriota phyl. nov. recovered from a high temperature, high salinity tertiary oil reservoir in north central Oklahoma, USA	2020	Systematic and Applied Microbiology	1	10.1016/j.syapm.2020.126057	https://www.scopus.com/inward/record.uri?eid=2-s2.0-85078239306&doi=10.1016%2fj.syapm.2020.126057&partnerID=40&md5=588034f4e2bddf3eaa6651ad0d8e1c06	Genome-resolved metagenomics; Rare biosphere; Syntrophic metabolism	English	Article	Final		Scopus	2-s2.0-85078239306
Meena H., Mishra R., Ranganathan S., Sarma V.V., Ampasala D.R., Kalia V.C., Lee J.-K., Siddhardha B.	57197780025;57214083852;57201278623;57201216699;55398615600;7004361912;27172120200;21735405900;	Phomopsis tersa as Inhibitor of Quorum Sensing System and Biofilm Forming Ability of Pseudomonas aeruginosa	2020	Indian Journal of Microbiology	15	10.1007/s12088-019-00840-y	https://www.scopus.com/inward/record.uri?eid=2-s2.0-85075155253&doi=10.1007%2fs12088-019-00840-y&partnerID=40&md5=69fdd0f1dfe3fafb44c175a850e6531f	Biofilm formation; Phomopsis tersa; Pseudomonas aeruginosa; Quorum sensing; Secondary metabolites	English	Article	Final	All Open Access, Bronze	Scopus	2-s2.0-85075155253
Li G., Zhao X., Zhang L., Yang J., Cui W., Yang Y., Zhang H.	16203250900;55903151800;55619279400;56975568800;13805955800;56712187400;35176912600;	Anisotropic ridge/groove microstructure for regulating morphology and biological function of Schwann cells	2020	Applied Materials Today	18	10.1016/j.apmt.2019.100468	https://www.scopus.com/inward/record.uri?eid=2-s2.0-85074385202&doi=10.1016%2fj.apmt.2019.100468&partnerID=40&md5=1a3149ce60492850168256597b003ac0	Anisotropic microtopography; Chitosan; Peripheral nerve; Physiological function; Schwann cell	English	Article	Final		Scopus	2-s2.0-85074385202
Ahmad A.	57210677879;	Process Evaluation for Petroleum Wastewater Co-digestion with Rye Grass to Enhance Methane Production	2020	Waste and Biomass Valorization	9	10.1007/s12649-018-0473-9	https://www.scopus.com/inward/record.uri?eid=2-s2.0-85054567106&doi=10.1007%2fs12649-018-0473-9&partnerID=40&md5=f4bd3ae0199f305fa84f59ab5c2842fb	Co-digestion; Methane yield; Petroleum wastewater; Process analysis; Rye grass biomass	English	Article	Final		Scopus	2-s2.0-85054567106
Rani M., Weadge J.T., Jabaji S.	35840346000;8662415300;6603956702;	Isolation and Characterization of Biosurfactant-Producing Bacteria From Oil Well Batteries With Antimicrobial Activities Against Food-Borne and Plant Pathogens	2020	Frontiers in Microbiology	27	10.3389/fmicb.2020.00064	https://www.scopus.com/inward/record.uri?eid=2-s2.0-85082557243&doi=10.3389%2ffmicb.2020.00064&partnerID=40&md5=64a67c3592bf99c6d36a16e0a2ea5fe5	biological control; biosurfactant producing bacteria; human pathogens; oil wells; plants; Salmonella; Xanthomonas campestris	English	Article	Final	All Open Access, Gold, Green	Scopus	2-s2.0-85082557243
Najt C.P., Khan S.A., Heden T.D., Witthuhn B.A., Perez M., Heier J.L., Mead L.E., Franklin M.P., Karanja K.K., Graham M.J., Mashek M.T., Bernlohr D.A., Parker L., Chow L.S., Mashek D.G.	56510249300;8949942000;26534304100;7004732107;56100255100;57220367069;57214889426;56763428300;14627430800;26643114100;8528460400;7006404788;9243119700;9337651700;35248463800;	Lipid Droplet-Derived Monounsaturated Fatty Acids Traffic via PLIN5 to Allosterically Activate SIRT1	2020	Molecular Cell	57	10.1016/j.molcel.2019.12.003	https://www.scopus.com/inward/record.uri?eid=2-s2.0-85079374939&doi=10.1016%2fj.molcel.2019.12.003&partnerID=40&md5=b2bd85fc29122b6778dd1cb673939851	ATGL; fatty acids; lipid droplets; lipolysis; MUFA; olive oil; oxidative metabolism; PGC-1α; PLIN5; SIRT1	English	Article	Final	All Open Access, Bronze, Green	Scopus	2-s2.0-85079374939
Cao Y., Ma C., Chen H., Chen G., White J.C., Xing B.	57191692779;56699109400;57212407488;11440165600;7405246727;7005212004;	Copper stress in flooded soil: Impact on enzyme activities, microbial community composition and diversity in the rhizosphere of Salix integra	2020	Science of the Total Environment	23	10.1016/j.scitotenv.2019.135350	https://www.scopus.com/inward/record.uri?eid=2-s2.0-85076611981&doi=10.1016%2fj.scitotenv.2019.135350&partnerID=40&md5=0e0a69f72d23c1f50f353dc76f4dcd29	Enzyme activity; Flooding; Heavy metal; Microflora; Rhizosphere	English	Article	Final	All Open Access, Bronze	Scopus	2-s2.0-85076611981
Deng Z., Jiang Y., Chen K., Li J., Zheng C., Gao F., Liu X.	37060505500;57213465032;57211517281;56125434500;57215579520;57220641717;57211525527;	One Biosurfactant-Producing Bacteria Achromobacter sp. A-8 and Its Potential Use in Microbial Enhanced Oil Recovery and Bioremediation	2020	Frontiers in Microbiology	16	10.3389/fmicb.2020.00247	https://www.scopus.com/inward/record.uri?eid=2-s2.0-85081223104&doi=10.3389%2ffmicb.2020.00247&partnerID=40&md5=753cbe5a1a11b6b84370eb931aec37c1	Achromobacter; biosurfactant; crude oil bioremediation; microbial enhanced oil recovery; oil viscosity	English	Article	Final	All Open Access, Gold, Green	Scopus	2-s2.0-85081223104
Peng X., Wang D., Wang G., Yang Y., Xiang S.	56553541200;7407070241;57205123961;57210635521;7101805949;	Numerical investigation on the heating performance of a transcritical CO2 vapor-injection heat pump system	2020	Applied Thermal Engineering	27	10.1016/j.applthermaleng.2019.114656	https://www.scopus.com/inward/record.uri?eid=2-s2.0-85075863276&doi=10.1016%2fj.applthermaleng.2019.114656&partnerID=40&md5=b59e16ec3ce4839abde664182b9c15d2	CO2; Electric vehicle; Heat pump; Injection; Simulation	English	Article	Final		Scopus	2-s2.0-85075863276
Reale M., Costantini E., D’angelo C., Coppeta L., Mangifesta R., Jagarlapoodi S., Di Nicola M., Di Giampaolo L.	57218147220;56255318800;57216851615;14323193900;50761097400;57213672545;57200842840;23472267300;	Network between cytokines, cortisol and occupational stress in gas and oilfield workers	2020	International Journal of Molecular Sciences	5	10.3390/ijms21031118	https://www.scopus.com/inward/record.uri?eid=2-s2.0-85079197501&doi=10.3390%2fijms21031118&partnerID=40&md5=314b673f5178fec8d7edf01699a432bb	Cortisol; Cytokines; Decision latitude (DL); Job stress; Oil and gas field worker; Psychological demands	English	Article	Final	All Open Access, Gold, Green	Scopus	2-s2.0-85079197501
Feng X., Liu Z., Jia X., Lu W.	57212461793;56925747200;8630703400;16313384300;	Distribution of Bacterial Communities in Petroleum-Contaminated Soils from the Dagang Oilfield, China	2020	Transactions of Tianjin University	10	10.1007/s12209-019-00226-7	https://www.scopus.com/inward/record.uri?eid=2-s2.0-85076774384&doi=10.1007%2fs12209-019-00226-7&partnerID=40&md5=7389da13cb799175af5ffa6a33aed84e	16s rRNA Illumina sequencing; Bacterial community diversity; Dagang Oilfield; Environmental factor correlation analysis; Petroleum-contaminated soil	English	Article	Final	All Open Access, Hybrid Gold	Scopus	2-s2.0-85076774384
Benamara C., Gharbi K., Nait Amar M., Hamada B.	57203506331;57196279883;57203039467;56469529500;	Prediction of Wax Appearance Temperature Using Artificial Intelligent Techniques	2020	Arabian Journal for Science and Engineering	21	10.1007/s13369-019-04290-y	https://www.scopus.com/inward/record.uri?eid=2-s2.0-85076722817&doi=10.1007%2fs13369-019-04290-y&partnerID=40&md5=f53b2d2c9e85967cb5a7d74990e0c950	Crude oil; GEP; MLP; Paraffin; Pour point tester; WAT	English	Article	Final		Scopus	2-s2.0-85076722817
Canada P., Pereira A., Nogueira N., Png-Gonzalez L., Andrade C., Xavier R.	25635564300;57215632903;11439064200;55747616800;14035132200;22235966000;	Analysis of bacterial microbiome associated with nylon and copper nets in an aquaculture context	2020	Aquaculture	6	10.1016/j.aquaculture.2019.734540	https://www.scopus.com/inward/record.uri?eid=2-s2.0-85073943372&doi=10.1016%2fj.aquaculture.2019.734540&partnerID=40&md5=4cb155c40fe263b7aff35cb16b57fab6	Biofilm; Copper; Metataxonomy; Nylon; Tenacibaculum	English	Article	Final		Scopus	2-s2.0-85073943372
Cyriaque V., Jacquiod S., Riber L., Abu Al-soud W., Gillan D.C., Sørensen S.J., Wattiez R.	57196088615;55897859400;15220785800;6506585530;7005481384;35592902600;7003755049;	Selection and propagation of IncP conjugative plasmids following long-term anthropogenic metal pollution in river sediments	2020	Journal of Hazardous Materials	6	10.1016/j.jhazmat.2019.121173	https://www.scopus.com/inward/record.uri?eid=2-s2.0-85072510356&doi=10.1016%2fj.jhazmat.2019.121173&partnerID=40&md5=28bfb8e097b24d14ffca9fa623557a81	Conjugative plasmid; FACS; Horizontal gene transfer; Metal pollution; River sediment; Sequencing	English	Article	Final		Scopus	2-s2.0-85072510356
Jones P.J.H., Lichtenstein A.H.	36078426500;7103110830;	Lipids	2020	Present Knowledge in Nutrition: Basic Nutrition and Metabolism	1	10.1016/B978-0-323-66162-1.00004-4	https://www.scopus.com/inward/record.uri?eid=2-s2.0-85131358174&doi=10.1016%2fB978-0-323-66162-1.00004-4&partnerID=40&md5=ec52b90bd5136f05ea54caf6942b4975	Catabolic and anabolic pathways; Cholesterol; Eicosanoids; Fatty acids; Lipids; Phospholipids; Sterols; Structural roles	English	Book Chapter	Final		Scopus	2-s2.0-85131358174
Zhou A., Ren X.	57200114506;36024283000;	Performance improvement of a supercritical CO2 and transcritical CO2 combined cycle for offshore gas turbine waste heat recovery	2020	Proceedings of the ASME Turbo Expo		10.1115/GT2020-14450	https://www.scopus.com/inward/record.uri?eid=2-s2.0-85099790007&doi=10.1115%2fGT2020-14450&partnerID=40&md5=4a8241bcb7b44d56fda7ec659940c8f9	Combined cycle; Multi-objective optimization; S-CO2 cycle; Thermodynamic and economic performances	English	Conference Paper	Final		Scopus	2-s2.0-85099790007
Ruan W., Nechaev Y., Chen L., Su C., Kiss I.	57219691871;57192938743;57221096449;57207861579;57216964937;	Towards an ASR error robust spoken language understanding system	2020	Proceedings of the Annual Conference of the International Speech Communication Association, INTERSPEECH	6	10.21437/Interspeech.2020-2844	https://www.scopus.com/inward/record.uri?eid=2-s2.0-85098143693&doi=10.21437%2fInterspeech.2020-2844&partnerID=40&md5=693de986ae9a0fb9b4974b8056d9b049	ASR error robustness; Marginalized CRF; Spoken language understanding	English	Conference Paper	Final		Scopus	2-s2.0-85098143693
Lenchi N., Anzil A., Servais P., Kebbouche-Gana S., Gana M.L., Llirós M.	55771612500;7006537370;7005849675;56527412100;26039122200;12645566200;	Microbacterium algeriense sp. Nov., a novel actinobacterium isolated from algerian oil production waters	2020	International Journal of Systematic and Evolutionary Microbiology		10.1099/ijsem.0.004434	https://www.scopus.com/inward/record.uri?eid=2-s2.0-85098009718&doi=10.1099%2fijsem.0.004434&partnerID=40&md5=0f8696082b9c888a45ca82e52c4e112b	Actinobacteria; Microbacterium algeriense sp. nov; Oilfield; Production water	English	Article	Final	All Open Access, Bronze	Scopus	2-s2.0-85098009718
Nimnoi P., Pongsilp N.	30067915700;6504083769;	Distribution and expression of virulence genes in potentially pathogenic bacteria isolated from seafood in Thailand [Distribución y expresión de genes de virulencia en bacterias potencialmente patógenas aisladas de mariscos y pescados en Tailandia]	2020	CYTA - Journal of Food	2	10.1080/19476337.2020.1842502	https://www.scopus.com/inward/record.uri?eid=2-s2.0-85096612832&doi=10.1080%2f19476337.2020.1842502&partnerID=40&md5=ed63724f63a4de5f2465fbf479aa5fb6	Pathogenic bacteria; seafood; Thailand; virulence gene	English	Article	Final	All Open Access, Gold	Scopus	2-s2.0-85096612832
Hassani M., Safi M., Rasti Ardakani R., Saedi Daryan A.	56814544600;7004636166;35249254400;24504105000;	Predicting fire resistance of SRC columns through gene expression programming	2020	Journal of Structural Fire Engineering	3	10.1108/JSFE-04-2020-0013	https://www.scopus.com/inward/record.uri?eid=2-s2.0-85095580744&doi=10.1108%2fJSFE-04-2020-0013&partnerID=40&md5=ee716419685e68009ccd1408d33625cd	Fire resistance; Gene expression programming; Predictive model; Steel-reinforced concrete columns	English	Article	Final		Scopus	2-s2.0-85095580744
Alsharid M., El-Bouri R., Sharma H., Drukker L., Papageorghiou A.T., Noble J.A.	57189700785;57219434838;56272987100;36241434600;6603569987;56185660000;	A Curriculum Learning Based Approach to Captioning Ultrasound Images	2020	Lecture Notes in Computer Science (including subseries Lecture Notes in Artificial Intelligence and Lecture Notes in Bioinformatics)	4	10.1007/978-3-030-60334-2_8	https://www.scopus.com/inward/record.uri?eid=2-s2.0-85092693368&doi=10.1007%2f978-3-030-60334-2_8&partnerID=40&md5=323af6b0e768b9735f65c0203e6832a2	Curriculum learning; Fetal ultrasound; Image captioning	English	Conference Paper	Final	All Open Access, Green	Scopus	2-s2.0-85092693368
Hameed S., Hans S., Singh S., Fatima Z.	24544441800;57195230860;57221223107;23476989200;	Harnessing metal homeostasis offers novel and promising targets against candida albicans	2020	Current Drug Discovery Technologies		10.2174/1570163816666190227231437	https://www.scopus.com/inward/record.uri?eid=2-s2.0-85090695343&doi=10.2174%2f1570163816666190227231437&partnerID=40&md5=319ba23c6996da581206747389ad1aef	Calcium; Copper; Iron; Magnesium and manganese; MDR; Micronutrient; Zinc	English	Review	Final		Scopus	2-s2.0-85090695343
Horve P.F., Dietz L.G., Ishaq S.L., Kline J., Fretz M., Van Den Wymelenberg K.G.	57210111377;57210115795;55612639200;9037066100;57204237136;15752016600;	Viable bacterial communities on hospital window components in patient rooms	2020	PeerJ		10.7717/peerj.9580	https://www.scopus.com/inward/record.uri?eid=2-s2.0-85090299098&doi=10.7717%2fpeerj.9580&partnerID=40&md5=35af5c10315143cd1b1affaed199f3f4	16S rRNA gene; Environmental microbiology; Hospital microbiome; Hospital-associated infections; Indoor microbial community	English	Article	Final	All Open Access, Gold, Green	Scopus	2-s2.0-85090299098
Bidzhieva S.K., Sokolova D.S., Grouzdev D.S., Kostrikina N.A., Poltaraus A.B., Tourova T.P., Shcherbakova V.A., Troshina O.Y., Nazina T.N.	25947284600;6602552612;55683461500;7004256762;56269272700;6701637195;57197731567;6603613251;6603798988;	Sphaerochaeta halotolerans sp. Nov., a novel spherical halotolerant spirochete from a russian heavy oil reservoir, emended description of the genus sphaerochaeta, reclassification of sphaerochaeta coccoides to a new genus parasphaerochaeta gen. nov. as parasphaerochaeta coccoides comb. nov. and proposal of sphaerochaetaceae fam. nov.	2020	International Journal of Systematic and Evolutionary Microbiology	4	10.1099/ijsem.0.004340	https://www.scopus.com/inward/record.uri?eid=2-s2.0-85090070179&doi=10.1099%2fijsem.0.004340&partnerID=40&md5=e4c3ef0a4e7c43a864f91c3ece60eec4	Oil field; Parasphaerochaeta gen. nov; Phylogenomic analysis; Polyphasic taxonomy; Sphaerochaeta halotolerans sp. nov; Sphaerochaetaceae fam. nov	English	Article	Final	All Open Access, Bronze	Scopus	2-s2.0-85090070179
Arceo-Vilas A., Fernandez-Lozano C., Pita S., Pértega-Díaz S., Pazos A.	57218551994;55062924200;6701568594;6602289723;7006526793;	Identification of predictive factors of the degree of adherence to the Mediterranean diet through machine-learning techniques	2020	PeerJ Computer Science	2	10.7717/PEERJ-CS.287	https://www.scopus.com/inward/record.uri?eid=2-s2.0-85089484955&doi=10.7717%2fPEERJ-CS.287&partnerID=40&md5=f044a89e8f0a0112bba2f6db70ab2505	Feature selection; Machine learning; Mediterranean diet; Nutrition disorders; Nutritional status; Support vector machines	English	Article	Final	All Open Access, Gold, Green	Scopus	2-s2.0-85089484955
Zhang Y.-X., Li F.-L., Ma S.-C., Zheng G.-D., Chen W.-F., Li W.-J., Wang L.	57216870710;57216855021;57216863295;7402224479;57202839526;57219824895;57196333135;	Frigidibacter oleivorans sp. nov., isolated from a deep well with oil reservoir water	2020	International Journal of Systematic and Evolutionary Microbiology	1	10.1099/ijsem.0.004294	https://www.scopus.com/inward/record.uri?eid=2-s2.0-85088880084&doi=10.1099%2fijsem.0.004294&partnerID=40&md5=25a4a127517304abef9110c561b00fd4	Frigidibacter oleivorans; Oil-contaminated water	English	Article	Final	All Open Access, Bronze	Scopus	2-s2.0-85088880084
Wang X.-T., Shan J.-J., Li X.-Z., Lin W., Xiu J.-L., Li D.-A., Zhang Y.-Z., Wang L.	57200762686;57216994887;24485445200;57217310739;36697485000;57205104123;56520481200;57196333135;	Tepidiphilus olei sp. nov., isolated from the production water of a water-flooded oil reservoir in PR China	2020	International Journal of Systematic and Evolutionary Microbiology	2	10.1099/ijsem.0.004297	https://www.scopus.com/inward/record.uri?eid=2-s2.0-85088879934&doi=10.1099%2fijsem.0.004297&partnerID=40&md5=6b8eb9682cccfffdeb9d601d9c88c133	16S rRNA gene; Genome; Oil reservoir; Polyphasic taxonomy; Tepidiphilus olei sp. nov	English	Article	Final	All Open Access, Bronze	Scopus	2-s2.0-85088879934
Habicht I., Mohsen G., Eichhorn L., Frede S., Weisheit C., Hilbert T., Treede H., Güresir E., Dewald O., Duerr G.D., Velten M.	57218119275;57218115301;55829492900;6603947579;25423363100;6701497450;6603390388;6508005611;6603468981;7801427055;23399272600;	DHA Supplementation Attenuates MI-Induced LV Matrix Remodeling and Dysfunction in Mice	2020	Oxidative Medicine and Cellular Longevity	3	10.1155/2020/7606938	https://www.scopus.com/inward/record.uri?eid=2-s2.0-85087991111&doi=10.1155%2f2020%2f7606938&partnerID=40&md5=7f958218dbd0fa4738fa744964fb80da		English	Article	Final	All Open Access, Gold, Green	Scopus	2-s2.0-85087991111
Udoh I.E., Zou J.	39362720200;57212626719;	Optimizing floating offshore multi-wind-turbine design: A parametricstudy on tower inclination and column spacing	2020	Proceedings of the Annual Offshore Technology Conference	1		https://www.scopus.com/inward/record.uri?eid=2-s2.0-85086247998&partnerID=40&md5=886c81426480fb7e4787b27f376e3729		English	Conference Paper	Final		Scopus	2-s2.0-85086247998
Batista J.H.G., Rebelo M., Soares-Souza G.	57217098963;7006671498;23971876300;	Decommissioning of subsea structures in Brazil: Impact of invasive species and genome sequence of the invasive azooxanthellate coral tubastraea sp.	2020	Proceedings of the Annual Offshore Technology Conference			https://www.scopus.com/inward/record.uri?eid=2-s2.0-85086230370&partnerID=40&md5=063651d934eaf0c80d37f3b392c54fbc		English	Conference Paper	Final		Scopus	2-s2.0-85086230370
Li F.-L., Wang X.-T., Shan J.-J., Li S., Zhang Y.-X., Li X.-Z., Li D.-A., Li W.-J., Wang L.	57216855021;57200762686;57216994887;55142602900;57216870710;24485445200;57205104123;57219824895;57196333135;	Oleiliquidispirillum nitrogeniifigens gen. Nov., sp. nov., a nemember of the family rhodospirillaceae isolated from oil reservoir water	2020	International Journal of Systematic and Evolutionary Microbiology	1	10.1099/ijsem.0.004200	https://www.scopus.com/inward/record.uri?eid=2-s2.0-85085664551&doi=10.1099%2fijsem.0.004200&partnerID=40&md5=8b8ca0f6815b7ac8200638e0b9bc9984	Oil reservoir water; Oleiliquidispirillum nitrogeniifigensgen. nov., sp. nov; Polyphasic taxonomy; Rhodospirillaceae	English	Article	Final	All Open Access, Bronze	Scopus	2-s2.0-85085664551
Lv X.-M., Yang M., Dai L.-R., Tu B., Chang C., Huang Y., Deng Y., Lawson P.A., Zhang H., Cheng L., Tang Y.-Q.	57212155345;57212156524;48761048200;57220475457;57216983501;57161195600;55261845800;7103001310;56909425200;57118601200;8956229300;	Zhaonella formicivorans gen. nov., sp. nov., an anaerobic formate-utilizing bacterium isolated from Shengli oilfield, and proposal of four novel families and Moorellales ord. nov. in the phylum Firmicutes	2020	International Journal of Systematic and Evolutionary Microbiology	3	10.1099/ijsem.0.004178	https://www.scopus.com/inward/record.uri?eid=2-s2.0-85085629756&doi=10.1099%2fijsem.0.004178&partnerID=40&md5=865714de178b58aec36e9aaa4bd4859c	Moorellalesorder nov.; Phylogenomics; Zhaonella formicivorans; Zhaonellaceae fam nov.	English	Article	Final	All Open Access, Bronze	Scopus	2-s2.0-85085629756
Zhang Y.-X., Li X., Li F.-L., Ma S.-C., Zheng G.-D., Chen W.-F., Li W.-J., Wang L.	57216870710;57214904129;57216855021;57216863295;7402224479;57202839526;57219824895;57196333135;	Paracoccus alkanivorans sp. nov., isolated from a deep well with oil reservoir water	2020	International Journal of Systematic and Evolutionary Microbiology	4	10.1099/ijsem.0.004036	https://www.scopus.com/inward/record.uri?eid=2-s2.0-85084971390&doi=10.1099%2fijsem.0.004036&partnerID=40&md5=545758e24ade18689c322665cb7efb81	Average nucleotide identity; Oil-contaminated water; Paracoccus alkanivorans sp. nov.; Polyphasic taxonomy	English	Article	Final	All Open Access, Bronze	Scopus	2-s2.0-85084971390
Bois R., Şimon A.-R., Sicre R., Gravier G., Sébillot P.	57073650400;56411479400;26423994800;6603275404;6505485382;	IrisA at TRECVID2015: Leveraging multimodal LDa for video hyperlinking	2020	2015 TREC Video Retrieval Evaluation, TRECVID 2015	2		https://www.scopus.com/inward/record.uri?eid=2-s2.0-85084727850&partnerID=40&md5=60e36477e8d2dc030bea5161abe41ad3		English	Conference Paper	Final		Scopus	2-s2.0-85084727850
Liu B., Yang X., Sheng M., Yang Z., Qiu J., Wang C., He J.	57197711437;57216189493;57205527024;57210738711;54789096600;51764652800;55714938600;	Sphingobacterium olei sp. Nov., isolated from oilcontaminated soil	2020	International Journal of Systematic and Evolutionary Microbiology	5	10.1099/ijsem.0.004000	https://www.scopus.com/inward/record.uri?eid=2-s2.0-85082779788&doi=10.1099%2fijsem.0.004000&partnerID=40&md5=ac33f11e8fd0c08eba79690745725770	16S rRNA gene; Gram-stain-negative; Oil-contaminated soil; Sphingobacterium olei sp.Nov; Taxonomy	English	Article	Final	All Open Access, Bronze	Scopus	2-s2.0-85082779788
Sohail R., Jamil N., Ali I., Munir S.	57214074202;22979792400;56648238400;56890793300;	Animal fat and glycerol bioconversion to polyhydroxyalkanoate by produced water bacteria	2020	E-Polymers	5	10.1515/epoly-2020-0011	https://www.scopus.com/inward/record.uri?eid=2-s2.0-85082126512&doi=10.1515%2fepoly-2020-0011&partnerID=40&md5=0baa6aca0840f045c2e154834b0e2566	16S rRNA sequencing; Bacillus tequilensis; Fourier transform infrared spectroscopy; polyhydroxyalkanoates (PHA); Pseudomonas aeruginosa	English	Article	Final	All Open Access, Gold	Scopus	2-s2.0-85082126512
Liu Y.-F., Chen J., Zaramela L.S., Wang L.-Y., Mbadinga S.M., Hou Z.-W., Wu X.-L., Gu J.-D., Zengler K., Mu B.-Z.	57285027300;57208251789;56364164100;36803082300;36802004800;7201896697;55714809900;7403129601;6603100087;55509556000;	Genomic and transcriptomic evidence supports methane metabolism in Archaeoglobi	2020	mSystems	10	10.1128/mSystems.00651-19	https://www.scopus.com/inward/record.uri?eid=2-s2.0-85082000837&doi=10.1128%2fmSystems.00651-19&partnerID=40&md5=6fc063954df5b6deaf9ebea17c945737	HGT; Horizontal gene transfer; MCR complex; Metatranscriptomics; Methanogens; Methyl-coenzyme M reductase complex; Oil reservoir	English	Article	Final	All Open Access, Gold, Green	Scopus	2-s2.0-85082000837
Wu K., Dai L., Tu B., Zhang X., Zhang H., Deng Y., Lawson P.A., Cheng L.	57215543420;48761048200;57220475457;57203327206;56909425200;55261845800;7103001310;57118601200;	Gudongella oleilytica gen. Nov., sp. nov., an aerotorelant bacterium isolated from Shengli oilfield and validation of family Tissierellaceae	2020	International Journal of Systematic and Evolutionary Microbiology	4	10.1099/ijsem.0.003854	https://www.scopus.com/inward/record.uri?eid=2-s2.0-85081121395&doi=10.1099%2fijsem.0.003854&partnerID=40&md5=b59ea0973e4ce2b3c1de2f3a65f877ac	Firmicutes; Gudongella; Tissierellaceae	English	Article	Final	All Open Access, Bronze	Scopus	2-s2.0-85081121395
Gu Y., Wu Z., Wang G., Zhi B., Yu J., Fan H., Guo S., Ma T., Li G.	57215196505;57215429400;57141096700;57204058360;57212749202;57215419651;57215425439;55728800200;55711209100;	Effects of Air Injection on the Metabolic Activity of Emulsifier-Producing Bacteria from Oil Reservoirs	2020	Geofluids		10.1155/2020/8987258	https://www.scopus.com/inward/record.uri?eid=2-s2.0-85080888189&doi=10.1155%2f2020%2f8987258&partnerID=40&md5=22c83df542d19d312fcf33c262f87b67		English	Article	Final	All Open Access, Gold, Green	Scopus	2-s2.0-85080888189
Li Y., Tang S., Zhang S., Xi Z., Wang P.	57192531176;23006693800;35108658100;57193616328;57214917376;	Biogeochemistry and water-rock interactions of coalbed methane co-produced water in the shizhuangnan block of the southern Qinshui Basin, China	2020	Water (Switzerland)	2	10.3390/w12010130	https://www.scopus.com/inward/record.uri?eid=2-s2.0-85079504054&doi=10.3390%2fw12010130&partnerID=40&md5=63b046a2caaf4e8751075568c12805ea	Biogeochemistry; Coal bed methane; HYdraulic head; Methanogens; Sulfate reducing bacteria	English	Article	Final	All Open Access, Gold, Green	Scopus	2-s2.0-85079504054
Khan M., Alkhathlan H.Z., Khan S.T.	56746742800;55958161300;12645181600;	Antibiotic and antibiofilm activities of Salvadora persica l. Essential oils against Streptococcus mutans: A detailed comparative study with chlorhexidine digluconate	2020	Pathogens	13	10.3390/pathogens9010066	https://www.scopus.com/inward/record.uri?eid=2-s2.0-85079129331&doi=10.3390%2fpathogens9010066&partnerID=40&md5=20f700b71dd1f6490a7b341cf99f9ae8	Antibiotic resistance; Chlorhexidine; Essential oils; Oral pathogens; S. mutans; Salvadora persica L	English	Article	Final	All Open Access, Gold, Green	Scopus	2-s2.0-85079129331
Lomakina A., Pogodaeva T., Kalmychkov G., Chernitsyna S., Zemskaya T.	35098875900;6506885655;56152982000;8702786300;6507096665;	Diversity of NC10 bacteria and ANME-2d archaea in sediments of fault zones at Lake Baikal	2020	Diversity	8	10.3390/d12010010	https://www.scopus.com/inward/record.uri?eid=2-s2.0-85078677743&doi=10.3390%2fd12010010&partnerID=40&md5=999aa63e89c181c9e9ba30ba24ddb457	Anaerobic oxidation of methane; Candidatus methanoperedens nitroreducens (ANME-2d); Candidatus methylomirabilis oxyfera (NC10); High-throughput sequencing of the 16S rRNA gene; Lake baikal; McrA gene; PmoA gene	English	Article	Final	All Open Access, Gold	Scopus	2-s2.0-85078677743
Umar A.A., Saaid I.M., Sulaimon A.A., Pilus R.M.	55802403400;7801463887;55601012800;37026967000;	Predicting the viscosity of petroleum emulsions using gene expression programming (GEP) and response surface methodology (RSM)	2020	Journal of Applied Mathematics	4	10.1155/2020/6215352	https://www.scopus.com/inward/record.uri?eid=2-s2.0-85078157475&doi=10.1155%2f2020%2f6215352&partnerID=40&md5=2baf9dee04d2911eb5e4647a8b21cee8		English	Article	Final	All Open Access, Gold	Scopus	2-s2.0-85078157475
Sakpuntoon V., Angchuan J., Boontham W., Khunnamwong P., Boonmak C., Srisuk N.	57204101505;57212755836;56316839200;56357967300;26535531400;8869534900;	Grease waste as a reservoir of lipase-producing yeast and description of limtongella siamensis gen. Nov., sp. nov	2020	Microorganisms	8	10.3390/microorganisms8010027	https://www.scopus.com/inward/record.uri?eid=2-s2.0-85077391637&doi=10.3390%2fmicroorganisms8010027&partnerID=40&md5=e116a9736741fb3e63f36dd523ca119a	Limtongella gen. Nov.; Limtongellasiamensis sp. Nov.; Lipase producing yeast; Oleaginous yeast	English	Article	Final	All Open Access, Gold, Green	Scopus	2-s2.0-85077391637
Fernandes C., Khandeparker R.D.S., Shenoy B.D.	57207313755;23980259700;8624353000;	High abundance of Vibrio in tarball-contaminated seawater from Vagator beach, Goa, India	2020	Marine Pollution Bulletin	2	10.1016/j.marpolbul.2019.110773	https://www.scopus.com/inward/record.uri?eid=2-s2.0-85075904068&doi=10.1016%2fj.marpolbul.2019.110773&partnerID=40&md5=a6eb45289ea2f1ddc5819598e9f0dd8e	Bacteria; Crude-oil; Culture-independent; Oil pollution; West Coast of India	English	Article	Final		Scopus	2-s2.0-85075904068
Hajri H., Abdallah H.	57210420657;56211685400;	Fluid flow and late diagenesis of fault-infill carbonates in the Aptian dolostones at Jabel Semmama, Kasserine area, western-central Tunisia	2020	Marine and Petroleum Geology	3	10.1016/j.marpetgeo.2019.07.051	https://www.scopus.com/inward/record.uri?eid=2-s2.0-85070603686&doi=10.1016%2fj.marpetgeo.2019.07.051&partnerID=40&md5=2b1a73303a399a38b11a00abd8b3940e	Aptian dolostones; Breccias; Calcite cements-microfacies; Fault-infills; Fluid flows; Late diagenesis; O/C isotopes	English	Article	Final		Scopus	2-s2.0-85070603686
Gassara O., Douarche F., Braconnier B., Bourbiaux B.	57196008943;8912176000;8327157000;6602829843;	Calibrating and Scaling Semi-empirical Foam Flow Models for the Assessment of Foam-Based EOR Processes (in Heterogeneous Reservoirs)	2020	Transport in Porous Media	9	10.1007/s11242-018-01223-5	https://www.scopus.com/inward/record.uri?eid=2-s2.0-85060258243&doi=10.1007%2fs11242-018-01223-5&partnerID=40&md5=965b717fc153971c95cada4c70d505da	Enhanced oil recovery; Foam; Heterogeneity; Models; Multi-phase flow; Porous media; Reservoir engineering; Reservoir simulation; Scaling laws	English	Article	Final	All Open Access, Green	Scopus	2-s2.0-85060258243
Blázquez-Pallí N., Rosell M., Varias J., Bosch M., Soler A., Vicent T., Marco-Urrea E.	57204567549;7003636155;57204558834;57204566281;7101994875;6603485456;15751111400;	Integrative isotopic and molecular approach for the diagnosis and implementation of an efficient in-situ enhanced biological reductive dechlorination of chlorinated ethenes	2019	Water Research	9	10.1016/j.watres.2019.115106	https://www.scopus.com/inward/record.uri?eid=2-s2.0-85072709911&doi=10.1016%2fj.watres.2019.115106&partnerID=40&md5=1ea1f0c3e5a32ea1abc4ed4b167270f0	Carbon isotopic mass balance; Chlorinated ethenes; Dehalococcoides; Enhanced reductive dechlorination; In-situ pilot test; Organohalide-respiring bacteria	English	Article	Final	All Open Access, Green	Scopus	2-s2.0-85072709911
Hu C., Wang L.-L., Lin Y.-Q., Liang H.-M., Zhou S.-Y., Zheng F., Feng X.-L., Rui Y.-Y., Shao L.-Q.	55560498000;53980505600;57211718432;57191752265;53980923400;55583825800;56122167600;35917080100;36175083700;	Nanoparticles for the Treatment of Oral Biofilms: Current State, Mechanisms, Influencing Factors, and Prospects	2019	Advanced Healthcare Materials	22	10.1002/adhm.201901301	https://www.scopus.com/inward/record.uri?eid=2-s2.0-85075474830&doi=10.1002%2fadhm.201901301&partnerID=40&md5=76f42924f992a8655658257ab6dc6dc9	antibacterial biomaterials; dental plaque; nanoparticles; oral biofilms	English	Review	Final		Scopus	2-s2.0-85075474830
Das B., Deka S.	57214094028;56365268900;	A cost-effective and environmentally sustainable process for phycoremediation of oil field formation water for its safe disposal and reuse	2019	Scientific Reports	13	10.1038/s41598-019-51806-5	https://www.scopus.com/inward/record.uri?eid=2-s2.0-85074091880&doi=10.1038%2fs41598-019-51806-5&partnerID=40&md5=8fafcfc6f3c4155feda1e48e8b917384		English	Article	Final	All Open Access, Gold, Green	Scopus	2-s2.0-85074091880
Cheng L., Shi S.-B., Yang L., Zhang Y., Dolfing J., Sun Y.-G., Liu L.-Y., Li Q., Tu B., Dai L.-R., Shi Q., Zhang H.	57118601200;55020855200;57189220632;35735739900;7004307624;7406426916;40361412800;57191695727;57220475457;48761048200;35280644500;56909425200;	Preferential degradation of long-chain alkyl substituted hydrocarbons in heavy oil under methanogenic conditions	2019	Organic Geochemistry	12	10.1016/j.orggeochem.2019.103927	https://www.scopus.com/inward/record.uri?eid=2-s2.0-85072738715&doi=10.1016%2fj.orggeochem.2019.103927&partnerID=40&md5=7cc61d181b355a29169dc4af263b185e	anaerobic biodegradation; Heavy oil; long-chain hydrocarbon; methane; oil reservoir	English	Article	Final		Scopus	2-s2.0-85072738715
Lu M., Luo X., Jiao J.J., Li H., Wang X., Gao J., Zhang X., Xiao K.	57218705872;55317484100;7102382963;35769216800;55354314300;57211013671;57200389043;57204063217;	Nutrients and heavy metals mediate the distribution of microbial community in the marine sediments of the Bohai Sea, China	2019	Environmental Pollution	21	10.1016/j.envpol.2019.113069	https://www.scopus.com/inward/record.uri?eid=2-s2.0-85072262301&doi=10.1016%2fj.envpol.2019.113069&partnerID=40&md5=458f2575ec571fc1b3210ea1b1c29592	Bohai sea; Heavy metals; Microbial community; Nutrients; Sediments	English	Article	Final		Scopus	2-s2.0-85072262301
Rani R., Gakkhar S., Moussaoui A.	57210917697;6602189155;25028296800;	Dynamics of a fishery system in a patchy environment with nonlinear harvesting	2019	Mathematical Methods in the Applied Sciences	6	10.1002/mma.5826	https://www.scopus.com/inward/record.uri?eid=2-s2.0-85071856323&doi=10.1002%2fmma.5826&partnerID=40&md5=86e6b4f8374beaf54499771f5b904d88	aggregation of variables; Hopf bifurcation; numerical simulations; stability; stock-effort dynamics	English	Article	Final		Scopus	2-s2.0-85071856323
Purwasena I.A., Astuti D.I., Syukron M., Amaniyah M., Sugai Y.	36093273900;36136584000;57484546400;57206479989;24831156300;	Stability test of biosurfactant produced by Bacillus licheniformis DS1 using experimental design and its application for MEOR	2019	Journal of Petroleum Science and Engineering	35	10.1016/j.petrol.2019.106383	https://www.scopus.com/inward/record.uri?eid=2-s2.0-85070899541&doi=10.1016%2fj.petrol.2019.106383&partnerID=40&md5=beacd14cabf7e44b0676958b2e70bb14	Bacillus licheniformis; Biosurfactant; Lipopeptide; MEOR; Stability	English	Article	Final	All Open Access, Hybrid Gold	Scopus	2-s2.0-85070899541
Berdugo-Clavijo C., Sen A., Seyyedi M., Quintero H., O’Neil B., Gieg L.M.	55070699300;8574524000;56386183800;55842730700;57208222228;6601913918;	High temperature utilization of PAM and HPAM by microbial communities enriched from oilfield produced water and activated sludge	2019	AMB Express	10	10.1186/s13568-019-0766-9	https://www.scopus.com/inward/record.uri?eid=2-s2.0-85064158986&doi=10.1186%2fs13568-019-0766-9&partnerID=40&md5=f9c83fa50d04953d2ae536a1a001db84	Biodegradation; HPAM; Hydraulic fracturing; PAM; Polyacrylamide; Wastewater sludge	English	Article	Final	All Open Access, Gold, Green	Scopus	2-s2.0-85064158986
Xia Q., Green B.D., Zhu Z., Li Y., Gharibzahedi S.M.T., Roohinejad S., Barba F.J.	55990874100;7401824687;55190640500;55876440700;57409586800;34880781000;36190434200;	Innovative processing techniques for altering the physicochemical properties of wholegrain brown rice (Oryza sativa L.)–opportunities for enhancing food quality and health attributes	2019	Critical Reviews in Food Science and Nutrition	39	10.1080/10408398.2018.1491829	https://www.scopus.com/inward/record.uri?eid=2-s2.0-85075093545&doi=10.1080%2f10408398.2018.1491829&partnerID=40&md5=a508dee247390b4d06af5c91aaba7251	cereal germination; Emerging nonthermal technologies; GABA; glycemic index; high hydrostatic pressure; low-pressure plasma	English	Review	Final	All Open Access, Green	Scopus	2-s2.0-85075093545
Miller H., Trivedi P., Qiu Y., Sedlacko E.M., Higgins C.P., Borch T.	57216105580;7103293519;57220823288;56275564100;8629429300;8963457000;	Food Crop Irrigation with Oilfield-Produced Water Suppresses Plant Immune Response	2019	Environmental Science and Technology Letters	19	10.1021/acs.estlett.9b00539	https://www.scopus.com/inward/record.uri?eid=2-s2.0-85073876519&doi=10.1021%2facs.estlett.9b00539&partnerID=40&md5=1dc5c0431c4c55fca9bac04b6edac175		English	Article	Final		Scopus	2-s2.0-85073876519
Salgar-Chaparro S.J., Machuca L.L.	57090962300;43861654600;	Complementary DNA/RNA-Based Profiling: Characterization of Corrosive Microbial Communities and Their Functional Profiles in an Oil Production Facility	2019	Frontiers in Microbiology	12	10.3389/fmicb.2019.02587	https://www.scopus.com/inward/record.uri?eid=2-s2.0-85075545689&doi=10.3389%2ffmicb.2019.02587&partnerID=40&md5=730104f2227f27e19e246c1f54b50150	16S rRNA gene; DNA; injection water; microbiologically influenced corrosion (MIC); oil production; produced water; RNA	English	Article	Final	All Open Access, Gold, Green	Scopus	2-s2.0-85075545689
Rubiano-Labrador C., Díaz-Cárdenas C., López G., Gómez J., Baena S.	55649334800;36100923400;51864091200;57211365521;6603442157;	Colombian Andean thermal springs: reservoir of thermophilic anaerobic bacteria producing hydrolytic enzymes	2019	Extremophiles	4	10.1007/s00792-019-01132-5	https://www.scopus.com/inward/record.uri?eid=2-s2.0-85073652266&doi=10.1007%2fs00792-019-01132-5&partnerID=40&md5=de73eafe639196279d6f7a0100118b5f	16S rRNA gene; Anaerobic thermophiles; Bacterial diversity; Colombian springs; Hydrolytic enzymes	English	Article	Final		Scopus	2-s2.0-85073652266
Adyasari D., Hassenrück C., Oehler T., Sabdaningsih A., Moosdorf N.	57200519051;55906447300;56740975700;57193738129;36508988300;	Microbial community structure associated with submarine groundwater discharge in northern Java (Indonesia)	2019	Science of the Total Environment	32	10.1016/j.scitotenv.2019.06.193	https://www.scopus.com/inward/record.uri?eid=2-s2.0-85068203487&doi=10.1016%2fj.scitotenv.2019.06.193&partnerID=40&md5=4832daa673a9806bd74ceb6dd17535c1	Fecal indicator; Indonesia; Microbial community composition; SGD; Submarine groundwater discharge; Subterranean estuary; Urban coasts	English	Article	Final		Scopus	2-s2.0-85068203487
Arramounet V., Winter C.E.D., Maljaars N., Girardin S., Robic H.	57211803365;57211799958;57211799490;57212007205;57205511415;	Development of coupling module between BHawC aeroelastic software and OrcaFlex for coupled dynamic analysis of floating wind turbines	2019	Journal of Physics: Conference Series	3	10.1088/1742-6596/1356/1/012007	https://www.scopus.com/inward/record.uri?eid=2-s2.0-85075036182&doi=10.1088%2f1742-6596%2f1356%2f1%2f012007&partnerID=40&md5=fc59b4a1c36da26ecf43a300c8d11074		English	Conference Paper	Final	All Open Access, Bronze	Scopus	2-s2.0-85075036182
Al-Madhagy S.A., Mostafa N.M., Youssef F.S., Awad G.E.A., Eldahshan O.A., Singab A.N.B.	57211285142;36603018400;55777940700;35271321700;6504494944;8706682500;	Metabolic profiling of a polyphenolic-rich fraction of: Coccinia grandis leaves using LC-ESI-MS/MS and in vivo validation of its antimicrobial and wound healing activities	2019	Food and Function	24	10.1039/c9fo01532a	https://www.scopus.com/inward/record.uri?eid=2-s2.0-85073310100&doi=10.1039%2fc9fo01532a&partnerID=40&md5=7dc5f4f786a14c9bd8833d1ecf583ac5		English	Article	Final		Scopus	2-s2.0-85073310100
Naser I.B., Mozammel Hoque M., Faruque S.N., Kamruzzaman M., Yamasaki S., Faruque S.M.	8513546900;57211146396;57211145484;57190726628;7202378579;7006250512;	Vibrio cholerae strains with inactivated cqsS gene overproduce autoinducer-2 which enhances resuscitation of dormant environmental V. Cholerae	2019	PLoS ONE	4	10.1371/journal.pone.0223226	https://www.scopus.com/inward/record.uri?eid=2-s2.0-85072799846&doi=10.1371%2fjournal.pone.0223226&partnerID=40&md5=8b9cab6004b98e14dcf4373d4017cc3b		English	Article	Final	All Open Access, Gold, Green	Scopus	2-s2.0-85072799846
Hemmati-Sarapardeh A., Ahmadi M., Ameli F., Dabir B., Mohammadi A.H., Husein M.M.	55556311300;57202593124;36170209700;56971743200;15127641000;6701490880;	Modeling asphaltene precipitation during natural depletion of reservoirs and evaluating screening criteria for stability of crude oils	2019	Journal of Petroleum Science and Engineering	10	10.1016/j.petrol.2019.05.078	https://www.scopus.com/inward/record.uri?eid=2-s2.0-85068091517&doi=10.1016%2fj.petrol.2019.05.078&partnerID=40&md5=cf329dd2c3cfa4247427ee26ef80ee40	Asphaltene precipitation; Flory-Huggins model; Intelligent techniques; Screening criteria; Stability	English	Article	Final		Scopus	2-s2.0-85068091517
Tao B., Chen M., Lin C., Lu L., Yuan Z., Liu J., Liao Q., Xia Z., Peng Z., Cai K.	57200962357;57205190435;57134090500;57199037439;57191418705;57202270093;55462854200;56803110200;48061488800;7102517545;	Zn-incorporation with graphene oxide on Ti substrates surface to improve osteogenic activity and inhibit bacterial adhesion	2019	Journal of Biomedical Materials Research - Part A	29	10.1002/jbm.a.36740	https://www.scopus.com/inward/record.uri?eid=2-s2.0-85067885781&doi=10.1002%2fjbm.a.36740&partnerID=40&md5=4756e98dec2f634f2097bc00104d135d	antibacterial coating; graphene oxide; osteogenesis; titanium; zinc	English	Article	Final		Scopus	2-s2.0-85067885781
Wu Y.-J., Liu P.-W.G., Hsu Y.-S., Whang L.-M., Lin T.-F., Hung W.-N., Cho K.-C.	37055106500;22035419600;57209302442;12243577400;50162047900;43661473200;41461019000;	Application of molecular biological tools for monitoring efficiency of trichloroethylene remediation	2019	Chemosphere	11	10.1016/j.chemosphere.2019.05.203	https://www.scopus.com/inward/record.uri?eid=2-s2.0-85067308355&doi=10.1016%2fj.chemosphere.2019.05.203&partnerID=40&md5=a22f8f4b41c351529a4e456ac6d8dfa0	Bioremediation; Dechlorination; Dehalococcoides sp.; Functional gene; qPCR; T-RFLP	English	Article	Final		Scopus	2-s2.0-85067308355
Zheng X., Lin X., Yan Y., Wen Y., Shi Y., Xie X., Hou A., Lai N.	37006183700;57210555782;57210557442;55883319300;57210555404;57210558299;57210551802;36600765300;	Effect of Reservoir Salinity between Bioacid and Carbonate Rock Based on Biometabolic Analysis	2019	Energy and Fuels	1	10.1021/acs.energyfuels.9b01522	https://www.scopus.com/inward/record.uri?eid=2-s2.0-85070920771&doi=10.1021%2facs.energyfuels.9b01522&partnerID=40&md5=9171463dd43640f9d5463f692f154d7a		English	Article	Final		Scopus	2-s2.0-85070920771
Hu Y.-H., Xuan L.-X., Qiu Q.-F.	56693144400;57201022154;24341595700;	Bacterial Community Composition in Channel Sediment in Response to Mariculture Wastewater Drainage [海水养殖尾水直排对河道沉积物细菌群落的影响]	2019	Huanjing Kexue/Environmental Science	2	10.13227/j.hjkx.201903166	https://www.scopus.com/inward/record.uri?eid=2-s2.0-85074347957&doi=10.13227%2fj.hjkx.201903166&partnerID=40&md5=cf2d6e69e6cdfbdc3490978bf3c9c735	Bacterial community; Diversity; High-throughput sequencing; Mariculture wastewater; Phospholipid fatty acid(PLFA)	Chinese	Article	Final		Scopus	2-s2.0-85074347957
Mao Y., Liu Y., Li H., He Q., Ai H., Gu W., Yang G.	56819597100;57859624100;57191868632;35227415600;26655199400;57202352300;57204643748;	Distinct responses of planktonic and sedimentary bacterial communities to anthropogenic activities: Case study of a tributary of the Three Gorges Reservoir, China	2019	Science of the Total Environment	16	10.1016/j.scitotenv.2019.05.172	https://www.scopus.com/inward/record.uri?eid=2-s2.0-85065853293&doi=10.1016%2fj.scitotenv.2019.05.172&partnerID=40&md5=3f6087cc5763ed74e375ad4eee0a9a3a	Bacterial diversity; Biogeographic pattern; Physicochemical parameters; Riverine; Variation partitioning analysis	English	Article	Final		Scopus	2-s2.0-85065853293
Bufe T., Hennig A., Klumpp J., Weiss A., Nieselt K., Schmidt H.	57210883498;57188562046;22835147900;57203560343;57207542352;7404731684;	Differential transcriptome analysis of enterohemorrhagic Escherichia coli strains reveals differences in response to plant-derived compounds	2019	BMC microbiology	2	10.1186/s12866-019-1578-4	https://www.scopus.com/inward/record.uri?eid=2-s2.0-85071738013&doi=10.1186%2fs12866-019-1578-4&partnerID=40&md5=18f1a88705a482cee48c55dbd6f43612	Biofilm; Differential gene expression; EHEC; Energy metabolism; Flagella; Lettuce medium; Motility; O104:H4 strain C227–11φcu; O157:H7 strain Sakai; O157:H− strain 3072/96; Plant extract; Transcriptome	English	Article	Final	All Open Access, Gold, Green	Scopus	2-s2.0-85071738013
Gao P., Li Y., Tan L., Guo F., Ma T.	45960926300;57211257237;57211256392;55659202300;55728800200;	Composition of bacterial and archaeal communities in an alkali-surfactant-polyacrylamide-flooded oil reservoir and the responses of microcosms to nutrients	2019	Frontiers in Microbiology	11	10.3389/fmicb.2019.02197	https://www.scopus.com/inward/record.uri?eid=2-s2.0-85073153424&doi=10.3389%2ffmicb.2019.02197&partnerID=40&md5=4bbdb8f5758a821689c18dee46c067a0	16S rRNA sequencing; Alkaline-surfactant-polyacrylamide; Halomonas; Microbial community; Oil reservoir	English	Article	Final	All Open Access, Gold, Green	Scopus	2-s2.0-85073153424
Belhart K., Gutierrez M.D.L.P., Zacca F., Ambrosis N., Gestal M.C., Taylor D., Dahlstrom K.M., Harvill E.T., O'Toole G.A., Sisti F., FeRNÁndez J.	57210737107;57210738315;57209008241;56074649300;56037430000;57197237696;57033858700;6701542885;7006620266;8863003300;7404574394;	Bordetella bronchiseptica diguanylate cyclase bdca regulates motility and is important for the establishment of respiratory infection in mice	2019	Journal of Bacteriology	4	10.1128/JB.00011-19	https://www.scopus.com/inward/record.uri?eid=2-s2.0-85071349489&doi=10.1128%2fJB.00011-19&partnerID=40&md5=91b9cf7b38fcb941993012100ae808df	Biofilm; Bordetella; C-di-gmp; Motility	English	Article	Final	All Open Access, Green	Scopus	2-s2.0-85071349489
Park J.P., Do M., Hong S.H., Ryu J., Kang D., Rho K., Ahn J.H., Lee H.	56484842200;55263470300;56542056700;56517456400;57210372951;57218704235;8055377100;11640444500;	BIOMOSAIC Film: Artificial Biofilms with Catalytic and Self-Sealing Properties	2019	Advanced Materials Interfaces	2	10.1002/admi.201900379	https://www.scopus.com/inward/record.uri?eid=2-s2.0-85070510207&doi=10.1002%2fadmi.201900379&partnerID=40&md5=c003a7fa91d3eb876fb4adec2b20b5b0	artificial biofilms; bacteria immobilization; biocatalysts; bioremediation; catecholamine chemistry	English	Article	Final		Scopus	2-s2.0-85070510207
González J.F., Tucker L., Fitch J., Wetzel A., White P., Gunn J.S.	56237625500;57210856265;56540947900;56541053200;57204282849;7201609041;	Human bile-mediated regulation of salmonella curli fimbriae	2019	Journal of Bacteriology	16	10.1128/JB.00055-19	https://www.scopus.com/inward/record.uri?eid=2-s2.0-85068581887&doi=10.1128%2fJB.00055-19&partnerID=40&md5=f224fbcea324f21ff02e3a2425571c44	Bile; Biofilm; Chronic carriage; Curli fimbriae; Salmonella	English	Conference Paper	Final	All Open Access, Green	Scopus	2-s2.0-85068581887
Petrik C.M., Stock C.A., Andersen K.H., van Denderen P.D., Watson J.R.	22980942300;9846295300;35598889400;57218466785;57209809196;	Bottom-up drivers of global patterns of demersal, forage, and pelagic fishes	2019	Progress in Oceanography	27	10.1016/j.pocean.2019.102124	https://www.scopus.com/inward/record.uri?eid=2-s2.0-85067609128&doi=10.1016%2fj.pocean.2019.102124&partnerID=40&md5=3dc829cf7a3b01e0a512659a2a6a7e1a	Allometry; Ecosystem; Fisheries oceanography; Mechanistic model; Trophodynamics	English	Article	Final	All Open Access, Green	Scopus	2-s2.0-85067609128
Liu Y.-F., Qi Z.-Z., Shou L.-B., Liu J.-F., Yang S.-Z., Gu J.-D., Mu B.-Z.	57285027300;57209293288;57209295757;36096880500;8719114200;7403129601;55509556000;	Anaerobic hydrocarbon degradation in candidate phylum ‘Atribacteria’ (JS1) inferred from genomics	2019	ISME Journal	30	10.1038/s41396-019-0448-2	https://www.scopus.com/inward/record.uri?eid=2-s2.0-85067255990&doi=10.1038%2fs41396-019-0448-2&partnerID=40&md5=e5345b56dfc86c5d07e7c93d8410b639		English	Article	Final	All Open Access, Hybrid Gold, Green	Scopus	2-s2.0-85067255990
Yildirim R.M., Arici M.	57190659939;7004571996;	Effect of the fermentation temperature on the degradation of phytic acid in whole-wheat sourdough bread	2019	LWT	24	10.1016/j.lwt.2019.05.122	https://www.scopus.com/inward/record.uri?eid=2-s2.0-85066937239&doi=10.1016%2fj.lwt.2019.05.122&partnerID=40&md5=b92fd41f53d07215515bdcd8c8b136c9	Lactic acid bacteria; Phytase activity; Phytic acid; Sourdough fermentation; Whole-wheat bread	English	Article	Final		Scopus	2-s2.0-85066937239
Hu Q.-Q., Zhou Z.-C., Liu Y.-F., Zhou L., Mbadinga S.M., Liu J.-F., Yang S.-Z., Gu J.-D., Mu B.-Z.	57209219197;56066595500;57285027300;55710625100;36802004800;36096880500;8719114200;7403129601;55509556000;	High microbial diversity of the nitric oxide dismutation reaction revealed by PCR amplification and analysis of the nod gene	2019	International Biodeterioration and Biodegradation	6	10.1016/j.ibiod.2019.05.025	https://www.scopus.com/inward/record.uri?eid=2-s2.0-85066839236&doi=10.1016%2fj.ibiod.2019.05.025&partnerID=40&md5=f73e0ff8fd15170e55fdb43d47710aa6	Distribution; Environmental samples; N-removal; Nitric oxide dismutase	English	Article	Final	All Open Access, Hybrid Gold	Scopus	2-s2.0-85066839236
Pu Y., Ngan W.Y., Yao Y., Habimana O.	57209025968;57209021413;57208787468;16315417300;	Could benthic biofilm analyses be used as a reliable proxy for freshwater environmental health?	2019	Environmental Pollution	16	10.1016/j.envpol.2019.05.111	https://www.scopus.com/inward/record.uri?eid=2-s2.0-85066339272&doi=10.1016%2fj.envpol.2019.05.111&partnerID=40&md5=1a772b5b914d810eeee039bcca4d79b2	16s rRNA sequencing; Biofilm; LC-MS/MS; SEM	English	Article	Final		Scopus	2-s2.0-85066339272
Ke C.-Y., Lu G.-M., Wei Y.-L., Sun W.-J., Hui J.-F., Zheng X.-Y., Zhang Q.-Z., Zhang X.-L.	23497054500;57200215150;57208644557;17347051800;26534477000;37035579100;24069565500;57194344351;	Biodegradation of crude oil by Chelatococcus daeguensis HB-4 and its potential for microbial enhanced oil recovery (MEOR)in heavy oil reservoirs	2019	Bioresource Technology	26	10.1016/j.biortech.2019.121442	https://www.scopus.com/inward/record.uri?eid=2-s2.0-85065418291&doi=10.1016%2fj.biortech.2019.121442&partnerID=40&md5=eea19a175f7d6955e18159588e7979f0	Biodegradation; Chelatococcus daeguensis; Core flooding test; Heavy oil reservoirs; Microbial enhanced oil recovery (MEOR)	English	Article	Final		Scopus	2-s2.0-85065418291
Tao K., Liu Y., Ke T., Zhang Y., Xiao L., Li S., Wei S., Chen L., Hu T.	57208316365;57208317911;57196943129;57203413432;55743418500;57208317499;57203411607;8909976900;15759762900;	Patterns of bacterial and archaeal communities in sediments in response to dam construction and sewage discharge in Lhasa River	2019	Ecotoxicology and Environmental Safety	18	10.1016/j.ecoenv.2019.03.107	https://www.scopus.com/inward/record.uri?eid=2-s2.0-85064460294&doi=10.1016%2fj.ecoenv.2019.03.107&partnerID=40&md5=3be2214cd05cded7e04a99530001e023	Anthropogenic activities; High-throughput sequencing; Lhasa river; Quantitative real-time polymerase chain reaction (qPCR); Sediment; Sedimentary bacterial communities	English	Article	Final		Scopus	2-s2.0-85064460294
Chen H., Bai X., Li Y., Jing L., Chen R., Teng Y.	37100919800;57204634246;57208672818;57196461655;57001736600;7102158782;	Characterization and source-tracking of antibiotic resistomes in the sediments of a peri-urban river	2019	Science of the Total Environment	30	10.1016/j.scitotenv.2019.05.063	https://www.scopus.com/inward/record.uri?eid=2-s2.0-85065467200&doi=10.1016%2fj.scitotenv.2019.05.063&partnerID=40&md5=c8ebbc6be87daec49c1dc5b13c75a975	Antibiotic resistance gene; Bacterial community; Chaobai River; CrAssphage; High-throughput sequencing; Microbial source tracking	English	Article	Final		Scopus	2-s2.0-85065467200
Rathi R., Lavania M., Singh N., Sarma P.M., Kishore P., Hajra P., Lal B.	56708320000;12808889500;57208276101;7203045865;57208275653;57208275222;7102603276;	Evaluating indigenous diversity and its potential for microbial methane generation from thermogenic coal bed methane reservoir	2019	Fuel	15	10.1016/j.fuel.2019.03.125	https://www.scopus.com/inward/record.uri?eid=2-s2.0-85064312741&doi=10.1016%2fj.fuel.2019.03.125&partnerID=40&md5=a91e78b805861a5c6f2c4daeeb8bed15	Biogenic methane; Coal bed methane; Jharia coal reserves; Methanogens; Thermogenic CBM reservoir	English	Article	Final	All Open Access, Bronze	Scopus	2-s2.0-85064312741
Rothman J.A., Andrikopoulos C., Cox-Foster D., McFrederick Q.S.	57195374574;57204591949;57203404936;12753792600;	Floral and Foliar Source Affect the Bee Nest Microbial Community	2019	Microbial Ecology	29	10.1007/s00248-018-1300-3	https://www.scopus.com/inward/record.uri?eid=2-s2.0-85058561173&doi=10.1007%2fs00248-018-1300-3&partnerID=40&md5=e989300e07a4e8bc1deb2109874016d8	16S rRNA gene sequencing; ITS sequencing; Microbial communities; Solitary bees	English	Article	Final	All Open Access, Green	Scopus	2-s2.0-85058561173
Ullah R., Yasir M., Bibi F., Abujamel T.S., Hashem A.M., Sohrab S.S., Al-Ansari A., Al-Sofyani A.A., Al-Ghamdi A.K., Al-sieni A., Azhar E.I.	57809826200;57212058563;35847390100;52563082100;57200589744;7003696284;36848569900;6507237745;35483194800;6505777507;23090055800;	Taxonomic diversity of antimicrobial-resistant bacteria and genes in the Red Sea coast	2019	Science of the Total Environment	15	10.1016/j.scitotenv.2019.04.283	https://www.scopus.com/inward/record.uri?eid=2-s2.0-85065105491&doi=10.1016%2fj.scitotenv.2019.04.283&partnerID=40&md5=954763bf1c2e7ca9988577c39ede4212	Antimicrobial resistance; Bacterial diversity; Culture-dependent; Red Sea	English	Article	Final		Scopus	2-s2.0-85065105491
Cutrona N., Gillard K., Ulrich R., Seemann M., Miller H.B., Blackledge M.S.	57209332393;57203212384;57546184900;57209329715;57199883604;55675029000;	From Antihistamine to Anti-infective: Loratadine Inhibition of Regulatory PASTA Kinases in Staphylococci Reduces Biofilm Formation and Potentiates β-Lactam Antibiotics and Vancomycin in Resistant Strains of Staphylococcus aureus	2019	ACS Infectious Diseases	14	10.1021/acsinfecdis.9b00096	https://www.scopus.com/inward/record.uri?eid=2-s2.0-85067394059&doi=10.1021%2facsinfecdis.9b00096&partnerID=40&md5=d6e2b5860dd9ae2722045c91b7c66665	antibiotic potentiation; biofilm inhibition; kinase inhibitor; MRSA; Staphylococcus epidermidis; Stk; Stk1	English	Article	Final		Scopus	2-s2.0-85067394059
Zhang Y., Koehler A.V., Wang T., Cunliffe D., Gasser R.B.	57200185365;25626764800;56416671600;57210362538;7202057246;	Enterocytozoon bieneusi genotypes in cats and dogs in Victoria, Australia	2019	BMC Microbiology	14	10.1186/s12866-019-1563-y	https://www.scopus.com/inward/record.uri?eid=2-s2.0-85070463942&doi=10.1186%2fs12866-019-1563-y&partnerID=40&md5=4facca22e1906ee2e28ceb70be2f1332	Australia; Cats; Dogs; Enterocytozoon bieneusi; Genotypes; Prevalence	English	Article	Final	All Open Access, Gold, Green	Scopus	2-s2.0-85070463942
Liu J., Wu J., Lin J., Zhao J., Xu T., Yang Q., Zhao J., Zhao Z., Song X.	56553531400;57195266337;57210412136;57191474319;57195945063;57203353500;57212296122;7404147874;14826087500;	Changes in the microbial community diversity of oil exploitation	2019	Genes	10	10.3390/genes10080556	https://www.scopus.com/inward/record.uri?eid=2-s2.0-85070652351&doi=10.3390%2fgenes10080556&partnerID=40&md5=46ad3c7bfc8db9c1de68efc6d1d4daa4	16S rRNA sequencing; Microbial community; Microbial enhanced oil recovery technology	English	Article	Final	All Open Access, Gold, Green	Scopus	2-s2.0-85070652351
Tsao H.-F., Scheikl U., Herbold C., Indra A., Walochnik J., Horn M.	57189294623;56289750900;56167741900;14045425400;6602193338;7202765864;	The cooling tower water microbiota: Seasonal dynamics and co-occurrence of bacterial and protist phylotypes	2019	Water Research	36	10.1016/j.watres.2019.04.028	https://www.scopus.com/inward/record.uri?eid=2-s2.0-85065879640&doi=10.1016%2fj.watres.2019.04.028&partnerID=40&md5=5f332b9c1108f57896ca7197a06fce19	Built environment; Chlamydia; Free-living amoeba; HVAC cooling tower; Legionella; Microbial diversity; Mycobacteria; Protists	English	Article	Final	All Open Access, Hybrid Gold, Green	Scopus	2-s2.0-85065879640
Purwasena I.A., Aditiawati P., Siwi I.K., Fauziyyah N.A.	36093273900;24779568900;57209849055;57210411507;	The effect of cymbopogon citratus essential oil on community dynamics of biofilm-forming bacteria isolated from brine water of oil reservoir in South Sumatra	2019	IOP Conference Series: Earth and Environmental Science	1	10.1088/1755-1315/299/1/012057	https://www.scopus.com/inward/record.uri?eid=2-s2.0-85070609892&doi=10.1088%2f1755-1315%2f299%2f1%2f012057&partnerID=40&md5=82735e136339437f4b49682305951bc4		English	Conference Paper	Final	All Open Access, Bronze	Scopus	2-s2.0-85070609892
Grouzdev D.S., Bidzhieva S.K., Sokolova D.S., Tourova T.P., Poltaraus A.B., Nazina T.N.	55683461500;25947284600;6602552612;6701637195;56269272700;6603798988;	Draft genome sequence of a fermenting bacterium, soehngenia sp. strain 1933p, isolated from a petroleum reservoir in Azerbaijan	2019	Microbiology Resource Announcements	3	10.1128/MRA.00689-19	https://www.scopus.com/inward/record.uri?eid=2-s2.0-85069742951&doi=10.1128%2fMRA.00689-19&partnerID=40&md5=5e9a5562c24c75dfb985a67f4d60625f		English	Article	Final	All Open Access, Gold, Green	Scopus	2-s2.0-85069742951
Grouzdev D.S., Semenova E.M., Sokolova D.S., Tourova T.P., Poltaraus A.B., Nazina T.N.	55683461500;57214910623;6602552612;6701637195;56269272700;6603798988;	Draft genome sequence of geotoga petraea strain HO-Geo1, isolated from a petroleum reservoir in Russia	2019	Microbiology Resource Announcements	3	10.1128/MRA.00706-19	https://www.scopus.com/inward/record.uri?eid=2-s2.0-85069701792&doi=10.1128%2fMRA.00706-19&partnerID=40&md5=79dd43a1bc2e8f8b34b6d2cdf2f1fab6		English	Article	Final	All Open Access, Gold, Green	Scopus	2-s2.0-85069701792
Fu Z., Shi H., Cheng D.	57207823574;12143152800;14009031600;	PET imaging agents targeting macrophage surface receptors [靶向巨噬细胞表面受体的PET显像剂]	2019	Kexue Tongbao/Chinese Science Bulletin		10.1360/N972018-01063	https://www.scopus.com/inward/record.uri?eid=2-s2.0-85071191491&doi=10.1360%2fN972018-01063&partnerID=40&md5=c8aaeaac4152d635663f642ddf918ab8	Inflammation; Macrophage; Microglia; Positron emission tomography; Radiotracer	Chinese	Review	Final		Scopus	2-s2.0-85071191491
Tahmasbi Rad A., Malik S., Yang L., Oberoi-Khanuja T.K., Nieh M.-P., Bahal R.	57207879927;57204913877;57105978200;55341396100;6701353226;34970682500;	A universal discoidal nanoplatform for the intracellular delivery of PNAs	2019	Nanoscale	18	10.1039/c9nr03667a	https://www.scopus.com/inward/record.uri?eid=2-s2.0-85068519830&doi=10.1039%2fc9nr03667a&partnerID=40&md5=1c8878bb9a031295fdade5a077933c9f		English	Article	Final	All Open Access, Green	Scopus	2-s2.0-85068519830
Tremblay N., Leiva L., Beermann J., Meunier C.L., Boersma M.	35197212700;57200731515;37661139600;35097632200;7005849520;	Effects of low-frequency noise and temperature on copepod and amphipod performance	2019	Proceedings of Meetings on Acoustics		10.1121/2.0001275	https://www.scopus.com/inward/record.uri?eid=2-s2.0-85139878797&doi=10.1121%2f2.0001275&partnerID=40&md5=a2838d5fbf10ee348e70e7a68ee93a55		English	Conference Paper	Final	All Open Access, Bronze, Green	Scopus	2-s2.0-85139878797
Toda K., Tamada H., Nakamura M., Matsumoto K.	55454267000;8863283000;57282443800;55378267900;	Characterizing Project Evolution on a Social Coding Platform	2019	Proceedings - 20th IEEE/ACIS International Conference on Software Engineering, Artificial Intelligence, Networking and Parallel/Distributed Computing, SNPD 2019		10.1109/SNPD.2019.8935866	https://www.scopus.com/inward/record.uri?eid=2-s2.0-85077964557&doi=10.1109%2fSNPD.2019.8935866&partnerID=40&md5=3008e086f76f059ec7cce5ec85e1a7cc	governance; project measurement; smart city; social coding; software evolution; software metrics	English	Conference Paper	Final		Scopus	2-s2.0-85077964557
Trabelsi M., Charpentier J.-F., Scuiller F., Franquet C., Nicolas E.	57220461896;7103343361;22434400400;57211524443;57211513673;	Energetic macroscopic representation and inversion-based control of a grid-connected MCT power generation system with super-capacitor based energy storage unit in Ushant Island	2019	2019 Offshore Energy and Storage Summit, OSES 2019	2	10.1109/OSES.2019.8867324	https://www.scopus.com/inward/record.uri?eid=2-s2.0-85074274953&doi=10.1109%2fOSES.2019.8867324&partnerID=40&md5=e04ab080ffa8f14170eee5b0356f031d	Energetic macroscopic representation; Energy storage system; Grid-connected; Inversion-based control; Tidal current turbine	English	Conference Paper	Final		Scopus	2-s2.0-85074274953
Koen A., Farres Antunez P., White A.	57211515161;57201986493;35588814900;	A study of working fluids for transcritical pumped thermal energy storage cycles	2019	2019 Offshore Energy and Storage Summit, OSES 2019	5	10.1109/OSES.2019.8867217	https://www.scopus.com/inward/record.uri?eid=2-s2.0-85074253359&doi=10.1109%2fOSES.2019.8867217&partnerID=40&md5=fcd5d1e317f8b7fade8a0af5a7fa198e	Pumped thermal energy storage; Transcritical cycle; Working fluid	English	Conference Paper	Final	All Open Access, Green	Scopus	2-s2.0-85074253359
Singhal N., Singh N.S., Maurya A.K., Virdi J.S.	17435528100;56404920000;57191413621;7003358184;	Virulence-associated traits and in vitro biofilm-forming ability of Escherichia coli isolated from a major river traversing Northern India	2019	Environmental Science and Pollution Research	2	10.1007/s11356-019-05389-3	https://www.scopus.com/inward/record.uri?eid=2-s2.0-85066292267&doi=10.1007%2fs11356-019-05389-3&partnerID=40&md5=c8af72088748ea9497d936978fbdb095	Antimicrobial resistance; Aquatic environment; Biofilms; Extra-intestinal pathogenic Escherichia coli (ExPEC); Virulence	English	Article	Final		Scopus	2-s2.0-85066292267
Godzien J., Kalaska B., Adamska-Patruno E., Siroka J., Ciborowski M., Kretowski A., Barbas C.	50261606600;55217611800;57219607067;6505651762;12042222900;7006552090;7101761748;	Oxidized glycerophosphatidylcholines in diabetes through non-targeted metabolomics: Their annotation and biological meaning	2019	Journal of Chromatography B: Analytical Technologies in the Biomedical and Life Sciences	10	10.1016/j.jchromb.2019.04.053	https://www.scopus.com/inward/record.uri?eid=2-s2.0-85065030133&doi=10.1016%2fj.jchromb.2019.04.053&partnerID=40&md5=5bbdb05cff0e8761527a27a4bd34cc41	Long chain oxidized glycerophosphatidylcholines; Metabolomics; oxGPCs; Oxidation; T2DM	English	Article	Final		Scopus	2-s2.0-85065030133
Bisoi S., Haldar S.	56096298500;23667484800;	3D Modeling of Long-Term Dynamic Behavior of Monopile-Supported Offshore Wind Turbine in Clay	2019	International Journal of Geomechanics	7	10.1061/(ASCE)GM.1943-5622.0001437	https://www.scopus.com/inward/record.uri?eid=2-s2.0-85064553145&doi=10.1061%2f%28ASCE%29GM.1943-5622.0001437&partnerID=40&md5=7ebfbba91cad9ca74ae9a28f5a32c0ea	Long-term behavior; Monopile; Numerical model; Offshore wind turbine; Three-dimensional (3D) analysis	English	Article	Final		Scopus	2-s2.0-85064553145
Liu Q., Tang J., Liu X., Song B., Zhen M., Ashbolt N.J.	55944936800;10140670300;57201523107;57195596897;56394160000;57222494960;	Vertical response of microbial community and degrading genes to petroleum hydrocarbon contamination in saline alkaline soil	2019	Journal of Environmental Sciences (China)	36	10.1016/j.jes.2019.02.001	https://www.scopus.com/inward/record.uri?eid=2-s2.0-85061965389&doi=10.1016%2fj.jes.2019.02.001&partnerID=40&md5=f6f97e2ad268d4f96b76ae9c41525451	Catabolic genes; Column microcosm; Microbial community; Molecular analyses; Petroleum hydrocarbons; Saline alkaline soil	English	Article	Final		Scopus	2-s2.0-85061965389
Zhang W., Hu X., Qiu X., Liu D., Feng L., Ma L., Hu J., Wang H.	57775760700;57202359032;49964505800;35746319900;57199898372;55790215800;57161319000;35088891700;	Microbiomes in Zhansan area, Shengli Oilfield, Shandong Province, China [山东胜利油田沾3油藏微生物组特征]	2019	Kexue Tongbao/Chinese Science Bulletin	1	10.1360/N972019-00135	https://www.scopus.com/inward/record.uri?eid=2-s2.0-85069645579&doi=10.1360%2fN972019-00135&partnerID=40&md5=11ec9b8015960b16bb0f571295a8ce74	High-throughput sequencing; Microbial diversity; Microbiomes; Oil reservoirs; Shengli Oilfield	Chinese	Article	Final	All Open Access, Bronze	Scopus	2-s2.0-85069645579
Murray M.K.R., Wallen B.M., Plante L., Quell K., Butkus M.A.	57214469124;57190009187;57196442101;56728816100;6601974494;	Beer brewing and the environmental engineer:”Tapping” into experiential learning	2019	ASEE Annual Conference and Exposition, Conference Proceedings			https://www.scopus.com/inward/record.uri?eid=2-s2.0-85078794157&partnerID=40&md5=b8b1019741a3946d05922c336b1305cf	Beer brewing; Engineering education; Environmental engineering education; Experiential learning; Fermentation; Laboratory experience	English	Conference Paper	Final		Scopus	2-s2.0-85078794157
Ahmadi M.A., Chen Z.	57218622761;57218619012;	Development of a robust correlation to determine an oil production rate through vapor extraction	2019	81st EAGE Conference and Exhibition 2019		10.3997/2214-4609.201901650	https://www.scopus.com/inward/record.uri?eid=2-s2.0-85084688364&doi=10.3997%2f2214-4609.201901650&partnerID=40&md5=e3e6cd5bffdcfe231afa69bf865363b9		English	Conference Paper	Final		Scopus	2-s2.0-85084688364
Jafari R., Javidi M.M., Kuchaki Rafsanjani M.	57221938714;54893872400;24528923500;	Using deep reinforcement learning approach for solving the multiple sequence alignment problem	2019	SN Applied Sciences	7	10.1007/s42452-019-0611-4	https://www.scopus.com/inward/record.uri?eid=2-s2.0-85100626512&doi=10.1007%2fs42452-019-0611-4&partnerID=40&md5=bfa0c6dbaa9c417f026fabc5fceda69d	Bioinformatics; Deep reinforcement learning; LSTM; Multiple sequence alignment	English	Article	Final	All Open Access, Bronze	Scopus	2-s2.0-85100626512
Rzewuska M., Kwiecień E., Chrobak-Chmiel D., Kizerwetter-Świda M., Stefańska I., Gieryńska M.	6701529388;57209338301;56646449800;55941879000;24482195000;6602453068;	Pathogenicity and virulence of trueperella pyogenes: A review	2019	International Journal of Molecular Sciences	66	10.3390/ijms20112737	https://www.scopus.com/inward/record.uri?eid=2-s2.0-85067512183&doi=10.3390%2fijms20112737&partnerID=40&md5=16169d225b49ed4cc2f6fb12c2c6cd17	Actinomycetales; Immune response; Infection; Pathogenicity; Pyolysin; Trueperella pyogenes; Virulence	English	Review	Final	All Open Access, Gold, Green	Scopus	2-s2.0-85067512183
He P., Fan B., Xu X., Ding J., Liang Y., Lou Y., Zhang Z., Chang X.	57199956128;57203792400;55706212600;57031050400;57189248952;57205223451;57205225529;57205218474;	Group K-SVD for the classification of gene expression data	2019	Computers and Electrical Engineering	6	10.1016/j.compeleceng.2019.03.009	https://www.scopus.com/inward/record.uri?eid=2-s2.0-85063375678&doi=10.1016%2fj.compeleceng.2019.03.009&partnerID=40&md5=8693ca7b4438cc372800aaca90c1befa	Classification; Dictionary learning; Gene expression data; K-SVD; Sparse representation	English	Article	Final		Scopus	2-s2.0-85063375678
Appolinario L.R., Tschoeke D., Paixão R.V.S., Venas T., Calegario G., Leomil L., Silva B.S., Thompson C.C., Thompson F.L.	56252374100;23478527200;57203061466;56252756600;56644845200;57193436784;56818595600;7404238407;7202217597;	Metagenomics sheds light on the metabolic repertoire of oil-biodegrading microbes of the South Atlantic Ocean	2019	Environmental Pollution	13	10.1016/j.envpol.2019.03.007	https://www.scopus.com/inward/record.uri?eid=2-s2.0-85063261827&doi=10.1016%2fj.envpol.2019.03.007&partnerID=40&md5=e810229dc713bfd24807466237be373e	Campos basin; Metagenomics; Microbial diversity; Oil biodegradation	English	Article	Final		Scopus	2-s2.0-85063261827
McGruer V., Pasparakis C., Grosell M., Stieglitz J.D., Benetti D.D., Greer J.B., Schlenk D.	57207695074;57074166600;7003437934;36706598800;7004057137;55332609000;7006018368;	Deepwater Horizon crude oil exposure alters cholesterol biosynthesis with implications for developmental cardiotoxicity in larval mahi-mahi (Coryphaena hippurus)	2019	Comparative Biochemistry and Physiology Part - C: Toxicology and Pharmacology	18	10.1016/j.cbpc.2019.03.001	https://www.scopus.com/inward/record.uri?eid=2-s2.0-85062729131&doi=10.1016%2fj.cbpc.2019.03.001&partnerID=40&md5=e68b73053c57179297941d275f0de0cf	3-Hydroxy-3-Methylglutaryl-CoA Reductase; Cardiotoxicity; Cholesterol; Farnesyl-diphosphate farnesyltransferase 1; Fish development; Mahi-mahi; Oil spill; Polycyclic aromatic hydrocarbons; SREBP cleavage-activating protein	English	Article	Final		Scopus	2-s2.0-85062729131
Wei Z., Li P., Huang S., Lkhagvagarav P., Zhu M., Liang C., Jia C.	56028162500;57188864569;57209102570;57209096450;57209105416;57209107522;8856866000;	Identification of key genes and molecular mechanisms associated with low egg production of broiler breeder hens in ad libitum	2019	BMC Genomics	9	10.1186/s12864-019-5801-3	https://www.scopus.com/inward/record.uri?eid=2-s2.0-85066492567&doi=10.1186%2fs12864-019-5801-3&partnerID=40&md5=17e832e00234ada3d96f28b4d7152c33	Ad libitum; Adipose; Gallus gallus; Liver; Ovary; Restricted feeding; Transcriptome	English	Article	Final	All Open Access, Gold, Green	Scopus	2-s2.0-85066492567
Reid T., Droppo I.G., Chaganti S.R., Weisener C.G.	56825224400;7003877587;38662201300;6602760377;	Microbial metabolic strategies for overcoming low-oxygen in naturalized freshwater reservoirs surrounding the Athabasca Oil Sands: A proxy for End-Pit Lakes?	2019	Science of the Total Environment	8	10.1016/j.scitotenv.2019.02.032	https://www.scopus.com/inward/record.uri?eid=2-s2.0-85061438627&doi=10.1016%2fj.scitotenv.2019.02.032&partnerID=40&md5=8604d58d86e64ae42bf98f4582086ebb	Bacteria; Bed sediment; Biodegradation; Gene expression; Hydrocarbon; Redox	English	Article	Final		Scopus	2-s2.0-85061438627
Xu X., Liu W., Wang W., Tian S., Jiang P., Qi Q., Li F., Li H., Wang Q., Li H., Yu H.	56525505400;57205740415;57205739296;57205741491;57205739899;57205745222;57205742647;57215369247;55544363900;55270770600;24342242100;	Potential biodegradation of phenanthrene by isolated halotolerant bacterial strains from petroleum oil polluted soil in Yellow River Delta	2019	Science of the Total Environment	28	10.1016/j.scitotenv.2019.02.080	https://www.scopus.com/inward/record.uri?eid=2-s2.0-85061406031&doi=10.1016%2fj.scitotenv.2019.02.080&partnerID=40&md5=6c27577bb1d2ced34b5eec941ea8b2ab	Achromobacter sp.; Delftia sp.; Halotolerant bacteria; Petroleum hydrocarbon-degrading bacteria; The Yellow River Delta	English	Article	Final		Scopus	2-s2.0-85061406031
Kadnikov V.V., Mardanov A.V., Beletsky A.V., Frank Y.A., Karnachuk O.V., Ravin N.V.	54881224000;6603650083;6603472192;7004442975;6602720731;6701534567;	Genome of a Member of the Candidate Archaeal Phylum Verstraetearchaeota from a Subsurface Thermal Aquifer Revealed Pathways of Methyl-Reducing Methanogenesis and Fermentative Metabolism	2019	Microbiology (Russian Federation)	1	10.1134/S0026261719030068	https://www.scopus.com/inward/record.uri?eid=2-s2.0-85067572443&doi=10.1134%2fS0026261719030068&partnerID=40&md5=342f631aec4a9d1af773da188f0f8ffc	Archaea; metagenome; methanogenesis; subsurface biosphere; Verstraetearchaeota	English	Article	Final		Scopus	2-s2.0-85067572443
König L., Wentrup C., Schulz F., Wascher F., Escola S., Swanson M.S., Buchrieser C., Horn M.	37034213100;49664523200;55575265700;56021177200;57209009496;7201598362;7003363257;7202765864;	Symbiont-mediated defense against Legionella pneumophila in amoebae	2019	mBio	26	10.1128/mBio.00333-19	https://www.scopus.com/inward/record.uri?eid=2-s2.0-85066288375&doi=10.1128%2fmBio.00333-19&partnerID=40&md5=ae13903b99fca8b9cbd46bb5a311c465	Amoeba; Antimicrobial defense; Coinfection; Endosymbionts; Legionella; Protists	English	Article	Final	All Open Access, Gold, Green	Scopus	2-s2.0-85066288375
Peng C., Zhang B., Wang W.	57205504560;57205502680;57192614951;	Genome sequence of aeribacillus pallidus W-12, a thermophilic bacterium containing possible biodesulfurization and biodenitrification pathways	2019	Microbiology Resource Announcements	1	10.1128/MRA.01570-18	https://www.scopus.com/inward/record.uri?eid=2-s2.0-85067946517&doi=10.1128%2fMRA.01570-18&partnerID=40&md5=9f1fe6b4822dd6defd0301450a65b180		English	Article	Final	All Open Access, Bronze, Green	Scopus	2-s2.0-85067946517
Schobben M., van de Schootbrugge B.	55844779600;9238980900;	Increased stability in carbon isotope records reflects emerging complexity of the biosphere	2019	Frontiers in Earth Science	4	10.3389/feart.2019.00087	https://www.scopus.com/inward/record.uri?eid=2-s2.0-85067410119&doi=10.3389%2ffeart.2019.00087&partnerID=40&md5=cf419bb88e5e322ffa1493a34c90ef84	Biofilms; Biomineralization; Biosignatures; Bioturbation; Carbon cycle; Diagenesis; Evolutionary innovation; Microbial carbonate	English	Article	Final	All Open Access, Gold, Green	Scopus	2-s2.0-85067410119
Ma T., Shi X., Yang Y., Xu B.	57208593866;57208593777;57208602830;57712084100;	Selection of a heat-resistant oil recovery bacteria	2019	IOP Conference Series: Materials Science and Engineering		10.1088/1757-899X/490/6/062019	https://www.scopus.com/inward/record.uri?eid=2-s2.0-85065243541&doi=10.1088%2f1757-899X%2f490%2f6%2f062019&partnerID=40&md5=e2521c4aa7d47dfcfff193afe18b6bde		English	Conference Paper	Final	All Open Access, Bronze	Scopus	2-s2.0-85065243541
Biswas S., Mukherjee P., Manna T., Dutta K., Guchhait K.C., Karmakar A., Karmakar M., Dua P., Panda A.K., Ghosh C.	55595475200;57203923498;57209034118;57196007378;57203930484;57189577836;57203928559;57189580562;57211727942;57202692853;	Quorum Sensing Autoinducer(s) and Flagellum Independently Mediate EPS Signaling in Vibrio cholerae Through LuxO-Independent Mechanism	2019	Microbial Ecology	7	10.1007/s00248-018-1262-5	https://www.scopus.com/inward/record.uri?eid=2-s2.0-85053620087&doi=10.1007%2fs00248-018-1262-5&partnerID=40&md5=da290d4e6cecf1dc2db2b97a706381b4	Autoinducer 2; Biofilm; Cholera autoinducer 1; Exopolysaccharide; Flagellum; Quorum sensing; Rugose colony; Vibrio cholerae	English	Article	Final		Scopus	2-s2.0-85053620087
Trego M.L., Hoh E., Whitehead A., Kellar N.M., Lauf M., Datuin D.O., Lewison R.L.	12142888400;16021785100;12800200000;12143859900;57191372395;57207962497;6603135119;	Contaminant Exposure Linked to Cellular and Endocrine Biomarkers in Southern California Bottlenose Dolphins	2019	Environmental Science and Technology	10	10.1021/acs.est.8b06487	https://www.scopus.com/inward/record.uri?eid=2-s2.0-85063387544&doi=10.1021%2facs.est.8b06487&partnerID=40&md5=0602bd3f46ce1178d5dcb2a78631aac8		English	Article	Final		Scopus	2-s2.0-85063387544
Convens B., Dong D., Furnemont R., Verstraten T., Cherelle P., Lefeber D., Vanderborght B.	57194597695;56957675700;56423631000;56743227400;26029745000;55161380600;57191490554;	Modeling, design and test-bench validation of a semi-active propulsive ankle prosthesis with a clutched series elastic actuator	2019	IEEE Robotics and Automation Letters	18	10.1109/LRA.2019.2897993	https://www.scopus.com/inward/record.uri?eid=2-s2.0-85065929802&doi=10.1109%2fLRA.2019.2897993&partnerID=40&md5=cc25b3d7159e1017cb7d1fabe873212f	compliant joint/mechanism; development and prototyping; product design; Prosthetics and exoskeletons	English	Article	Final		Scopus	2-s2.0-85065929802
You J., Li Y., Hong S., Wang J., Yu J., Mu B., Ma X., Xue Y.	57196002762;57205747823;57203936468;57208348813;57203943322;55509556000;57205739138;7402270781;	Tepidicella baoligensis sp. nov., A Novel Member of Betaproteobacterium Isolated from an Oil Reservoir	2019	Current Microbiology	3	10.1007/s00284-018-1604-z	https://www.scopus.com/inward/record.uri?eid=2-s2.0-85061405392&doi=10.1007%2fs00284-018-1604-z&partnerID=40&md5=7d30919dd33b5b5abcba30193bfbbbe7		English	Article	Final		Scopus	2-s2.0-85061405392
Gao S., Liang J., Teng T., Zhang M.	57197716040;7404541220;57205200986;57205203410;	Petroleum contamination evaluation and bacterial community distribution in a historic oilfield located in loess plateau in China	2019	Applied Soil Ecology	51	10.1016/j.apsoil.2018.12.012	https://www.scopus.com/inward/record.uri?eid=2-s2.0-85058993962&doi=10.1016%2fj.apsoil.2018.12.012&partnerID=40&md5=853f48e258936aa7d36dfc5b95749b6f	16Sr RNA sequencing; Bacterial community; Petroleum contamination; Petroleum fingerprinting	English	Article	Final		Scopus	2-s2.0-85058993962
Wang X., Li X., Yu L., Li Y., Huang L., Lin W., Li D.	57200762686;24485445200;26023967800;57132500100;56034986200;57217310739;57205104123;	Distinctive microbial communities imply the main mechanism in a MEOR trial in high pour-point reservoir	2019	Journal of Petroleum Science and Engineering	9	10.1016/j.petrol.2018.12.032	https://www.scopus.com/inward/record.uri?eid=2-s2.0-85058554093&doi=10.1016%2fj.petrol.2018.12.032&partnerID=40&md5=e44b2473b323cee05def45c4e7a69b04	Bio-emulsification; Biodegradation; ESPB(Exogenous surfactant-producing bacteria); High pour-point oil reservoir; MEOR (microbial enhanced oil recovery); NRB(Nitrate reducing bacteria)	English	Article	Final		Scopus	2-s2.0-85058554093
Liu T., Wang L., Hu J., Ba Y., Liu F., Cao Y.	56948399000;57207495003;57161319000;57162748400;57208550174;27171578500;	Effect of Gas Distribution on Flora Structure and Oil Displacement in MEOR [微生物驱油过程中配气对菌群结构及驱油效果的影响]	2019	Oilfield Chemistry		10.19346/j.cnki.1000-4092.2019.01.027	https://www.scopus.com/inward/record.uri?eid=2-s2.0-85065089872&doi=10.19346%2fj.cnki.1000-4092.2019.01.027&partnerID=40&md5=86ec233d8ebcb3afaee356d2b9839b22	Atmosphere; Microbial flooding; Microbial flora; Oil displacement effect; Small molecule acid	Chinese	Article	Final		Scopus	2-s2.0-85065089872
Liang Z.	57215288139;	Comparison of type I interferon expression in adult and neonatal mice during respiratory viral infection	2019	Proceedings of 11th International Conference on Bioinformatics and Computational Biology, BiCOB 2019			https://www.scopus.com/inward/record.uri?eid=2-s2.0-85078009857&partnerID=40&md5=11e32813ae7840e67c18e113f31b1f67		English	Conference Paper	Final		Scopus	2-s2.0-85078009857
Mehmetoğlu İ., Çelik M., Atalar M.N., Mehmetoğlu Z., Aygün A., Şen F.	10044706700;57208174805;57203682358;57208174949;57195693468;8449363400;	Investigation of Asymmetric Dimethylarginine, Adiponectin, Zn, and Cu Levels in Obese Subjects	2019	BioNanoScience	1	10.1007/s12668-018-0591-7	https://www.scopus.com/inward/record.uri?eid=2-s2.0-85064055992&doi=10.1007%2fs12668-018-0591-7&partnerID=40&md5=2cd2446b6622bb6724af0eb57b1d2b64	Adiponectin; Asymmetric dimethylarginine; Obesity	English	Article	Final		Scopus	2-s2.0-85064055992
Phetcharat T., Dawkrajai P., Chitov T., Mhuantong W., Champreda V., Bovonsombut S.	57204839810;12768514300;25228370700;33368154000;12242766400;57188803732;	Biosurfactant-Producing Capability and Prediction of Functional Genes Potentially Beneficial to Microbial Enhanced Oil Recovery in Indigenous Bacterial Communities of an Onshore Oil Reservoir	2019	Current Microbiology	7	10.1007/s00284-019-01641-8	https://www.scopus.com/inward/record.uri?eid=2-s2.0-85061228931&doi=10.1007%2fs00284-019-01641-8&partnerID=40&md5=1cc0b987e043a29fd0acc3dd894d4abf		English	Article	Final		Scopus	2-s2.0-85061228931
Jahanbani Veshareh M., Ganji Azad E., Deihimi T., Niazi A., Ayatollahi S.	57207202220;56411923400;35199602700;57201022224;7003679429;	Isolation and screening of Bacillus subtilis MJ01 for MEOR application: biosurfactant characterization, production optimization and wetting effect on carbonate surfaces	2019	Journal of Petroleum Exploration and Production Technology	25	10.1007/s13202-018-0457-0	https://www.scopus.com/inward/record.uri?eid=2-s2.0-85062151462&doi=10.1007%2fs13202-018-0457-0&partnerID=40&md5=9e9166f0516bafa4eea71c09291bf8f5	Box–Behnken design; Microbial enhanced oil recovery; Surfactin; Wettability alteration	English	Article	Final	All Open Access, Gold, Green	Scopus	2-s2.0-85062151462
Muraleedharan C., Talreja D., Kanwar M., Kumar A., Walia S.K.	56193982200;36962001900;16241390500;55574185802;7003364457;	Occurrence of extended-spectrum β-lactamase-producing bacteria in urban Clinton River habitat	2019	Journal of Global Antimicrobial Resistance	9	10.1016/j.jgar.2018.10.007	https://www.scopus.com/inward/record.uri?eid=2-s2.0-85061538798&doi=10.1016%2fj.jgar.2018.10.007&partnerID=40&md5=8896ad0e4ddf92a75fe7db6ce00494d6	Antimicrobial resistance; ESBL; Extended-spectrum β-lactamase; Reservoir; River water	English	Article	Final		Scopus	2-s2.0-85061538798
Elumalai P., Parthipan P., Narenkumar J., Anandakumar B., Madhavan J., Oh B.-T., Rajasekar A.	57193158004;57193152696;57194229197;57205747311;57951034800;7202848411;55928874800;	Role of thermophilic bacteria (Bacillus and Geobacillus) on crude oil degradation and biocorrosion in oil reservoir environment	2019	3 Biotech	30	10.1007/s13205-019-1604-0	https://www.scopus.com/inward/record.uri?eid=2-s2.0-85061399119&doi=10.1007%2fs13205-019-1604-0&partnerID=40&md5=3ef3daea6410b96a62b362e84f69322d	Biocorrosion; Biodegradation; Carbon steel; Oil reservoir; Thermophilic bacteria	English	Article	Final	All Open Access, Green	Scopus	2-s2.0-85061399119
Bhattacharya M., Guchhait S., Biswas D., Singh R.	56400287700;8907924700;7101770132;57225989189;	Evaluation of a microbial consortium for crude oil spill bioremediation and its potential uses in enhanced oil recovery	2019	Biocatalysis and Agricultural Biotechnology	11	10.1016/j.bcab.2019.101034	https://www.scopus.com/inward/record.uri?eid=2-s2.0-85061381761&doi=10.1016%2fj.bcab.2019.101034&partnerID=40&md5=ca7df5fd91a118a835cdd9c35031ba5d	Biodegradation; Bioemulsifier; Crude oil; Exopolysaccharide; Microbial enhanced oil recovery; Sand-pack flooding	English	Article	Final		Scopus	2-s2.0-85061381761
Liang C., Huang Y., Wang Y., Ye Q., Zhang Z., Wang H.	57203931286;56969976300;57200225975;57195631111;57200628451;55233528600;	Distribution of bacterial polycyclic aromatic hydrocarbon (PAH) ring-hydroxylating dioxygenases genes in oilfield soils and mangrove sediments explored by gene-targeted metagenomics	2019	Applied Microbiology and Biotechnology	24	10.1007/s00253-018-09613-x	https://www.scopus.com/inward/record.uri?eid=2-s2.0-85060330749&doi=10.1007%2fs00253-018-09613-x&partnerID=40&md5=6d4e4b3ddaa5a20d8c3af56cb59ffbd4	Biodegradation; Gene-targeted metagenomics; PAH ring-hydroxylating dioxygenases; PAH-degrading bacteria; Polycyclic aromatic hydrocarbons (PAHs)	English	Article	Final		Scopus	2-s2.0-85060330749
Chen J., Liu Y.-F., Zhou L., Mbadinga S.M., Yang T., Zhou J., Liu J.-F., Yang S.-Z., Gu J.-D., Mu B.-Z.	57208251789;57285027300;55710625100;36802004800;57197380111;57189605723;36096880500;8719114200;7403129601;55509556000;	Methanogenic degradation of branched alkanes in enrichment cultures of production water from a high-temperature petroleum reservoir	2019	Applied Microbiology and Biotechnology	14	10.1007/s00253-018-09574-1	https://www.scopus.com/inward/record.uri?eid=2-s2.0-85059692164&doi=10.1007%2fs00253-018-09574-1&partnerID=40&md5=90f0caf26d04a77e79a1ccd2fa3ac0e5	Alkylsuccinate; assA gene; High-temperature petroleum reservoir; iso-Alkanes or branched alkanes; Methanogenic degradation	English	Article	Final		Scopus	2-s2.0-85059692164
Dias C., Ribeiro M., Correia-Branco A., Domínguez-Perles R., Martel F., Saavedra M.J., Simões M.	36772701000;56004933300;55349034600;15834014400;7005164101;8405237300;57220607747;	Virulence, attachment and invasion of Caco-2 cells by multidrug-resistant bacteria isolated from wild animals	2019	Microbial Pathogenesis	4	10.1016/j.micpath.2019.01.011	https://www.scopus.com/inward/record.uri?eid=2-s2.0-85059691983&doi=10.1016%2fj.micpath.2019.01.011&partnerID=40&md5=01969a98c9b0a03e92d56ee47f38bced	Bacterial attachment; Caco-2 cell line; Host cells invasion; Virulence; Wild animals	English	Article	Final		Scopus	2-s2.0-85059691983
Osman K.M., Badr J., Orabi A., Elbehiry A., Saad A., Ibrahim M.D.S., Hanafy M.H.	25028406400;57192974755;57201889804;57192299011;56647605400;57197801205;57219857749;	Poultry as a vector for emerging multidrug resistant Enterococcus spp.: First report of vancomycin (van) and the chloramphenicol–florfenicol (cat-fex-cfr) resistance genes from pigeon and duck faeces	2019	Microbial Pathogenesis	25	10.1016/j.micpath.2019.01.006	https://www.scopus.com/inward/record.uri?eid=2-s2.0-85059633190&doi=10.1016%2fj.micpath.2019.01.006&partnerID=40&md5=2d82275dae75fb0b50c01465c42d912a	Biofilm formation; Chicken; Chloramphenicol–florfenicol resistance genes; Duck; Enterococcus species; Pigeon; Vancomycin resistance genes	English	Article	Final		Scopus	2-s2.0-85059633190
Sanyal S.K., Shuster J., Reith F.	56973399000;48661338100;55910145900;	Cycling of biogenic elements drives biogeochemical gold cycling	2019	Earth-Science Reviews	24	10.1016/j.earscirev.2018.12.010	https://www.scopus.com/inward/record.uri?eid=2-s2.0-85058501856&doi=10.1016%2fj.earscirev.2018.12.010&partnerID=40&md5=99f173fb8b1d16b198a8c9641c719227	Bacteria; Biogeochemistry; Carbon; Element cycles; Gold; Intercycle coupling; Microorganisms; Nitrogen; Sulfur	English	Review	Final	All Open Access, Green	Scopus	2-s2.0-85058501856
Chen H., Bai X., Jing L., Chen R., Teng Y.	37100919800;57204634246;57196461655;57001736600;7102158782;	Characterization of antibiotic resistance genes in the sediments of an urban river revealed by comparative metagenomics analysis	2019	Science of the Total Environment	36	10.1016/j.scitotenv.2018.11.052	https://www.scopus.com/inward/record.uri?eid=2-s2.0-85056450697&doi=10.1016%2fj.scitotenv.2018.11.052&partnerID=40&md5=98a3c379ca31922ad89afb865c1a9a0c	Antibiotic resistance genes; Chaobai River; Metagenomics; Network analysis; River sediments	English	Article	Final		Scopus	2-s2.0-85056450697
Nathani N.M., Mootapally C., Dave B.P.	55651501100;57034112200;36856376100;	Antibiotic resistance genes allied to the pelagic sediment microbiome in the Gulf of Khambhat and Arabian Sea	2019	Science of the Total Environment	15	10.1016/j.scitotenv.2018.10.409	https://www.scopus.com/inward/record.uri?eid=2-s2.0-85056207654&doi=10.1016%2fj.scitotenv.2018.10.409&partnerID=40&md5=3983b13360dfdad0ff785f40d9e661c4	Antibiotic resistome; Deep microbiome; Gulf; Marine bacteria; Sedimentomics; Shotgun metagenomics	English	Article	Final		Scopus	2-s2.0-85056207654
Wang X., Li X., Yu L., Huang L., Xiu J., Lin W., Zhang Y.	57200762686;24485445200;26023967800;56034986200;36697485000;57217310739;57204570194;	Characterizing the microbiome in petroleum reservoir flooded by different water sources	2019	Science of the Total Environment	21	10.1016/j.scitotenv.2018.10.410	https://www.scopus.com/inward/record.uri?eid=2-s2.0-85056192447&doi=10.1016%2fj.scitotenv.2018.10.410&partnerID=40&md5=64b9db8574d59d0ae5ab9182c01cee14	Metabolic potential; Metagenome; Microbial community; Microbiome; Water-flooded petroleum reservoir	English	Article	Final		Scopus	2-s2.0-85056192447
Tomlinson L., Hyndman L., Firman J.W., Bentley R., Kyffin J.A., Webb S.D., McGinty S., Sharma P.	57206659866;57210189679;57202072521;57206667490;57200501406;35585509500;35211570900;7403232038;	In vitro Liver Zonation of Primary Rat Hepatocytes	2019	Frontiers in Bioengineering and Biotechnology	14	10.3389/fbioe.2019.00017	https://www.scopus.com/inward/record.uri?eid=2-s2.0-85091851215&doi=10.3389%2ffbioe.2019.00017&partnerID=40&md5=009964e67cb0a1f506f747dabb13aa9f	drug-induced liver injury; flow system; in vitro model; liver zonation; mathematical modeling	English	Article	Final	All Open Access, Gold, Green	Scopus	2-s2.0-85091851215
Boonanuntanasarn S., Nakharuthai C., Schrama D., Duangkaew R., Rodrigues P.M.	6508321248;25722184600;55755583400;57204029286;55107531000;	Effects of dietary lipid sources on hepatic nutritive contents, fatty acid composition and proteome of Nile tilapia (Oreochromis niloticus)	2019	Journal of Proteomics	17	10.1016/j.jprot.2018.09.003	https://www.scopus.com/inward/record.uri?eid=2-s2.0-85054151075&doi=10.1016%2fj.jprot.2018.09.003&partnerID=40&md5=7d412a661ee3cb26e5ab6ebdd89e13ca	Gene expression; n-3 PUFA; n-6 PUFA; Nile tilapia; Proteomics; Saturated fatty acids	English	Article	Final		Scopus	2-s2.0-85054151075
Hu J., Shu Q., Sun G., Liu T., Song Y., Cao Y., Wang W.	57161319000;8549688300;56599511100;56948399000;7404920033;27171578500;56969961600;	Succession of indigenous microbe in reservoirs and its effect on displacement efficiency [油藏内源微生物演替规律及其对驱油效果的影响]	2019	Zhongguo Shiyou Daxue Xuebao (Ziran Kexue Ban)/Journal of China University of Petroleum (Edition of Natural Science)	3	10.3969/j.issn.1673-5005.2019.01.013	https://www.scopus.com/inward/record.uri?eid=2-s2.0-85063943144&doi=10.3969%2fj.issn.1673-5005.2019.01.013&partnerID=40&md5=39ca68c43c89729524a843032ad1ab1c	Displacement efficiency; Dynamic continuous displacement; Indigenous microbe oil displacement; Long core; Microbial characteristics	Chinese	Article	Final		Scopus	2-s2.0-85063943144
Yu W., Chen H., Song J., Zhao C., Du X., Guo C., Song Q.	57205638425;57191197926;56061793700;10244650200;35291766400;57205641924;56449994500;	Microbial community from arid desert oilfield in response to accurate bio-stimulation remediation	2019	Petroleum Science and Technology	1	10.1080/10916466.2018.1547752	https://www.scopus.com/inward/record.uri?eid=2-s2.0-85060922262&doi=10.1080%2f10916466.2018.1547752&partnerID=40&md5=2519e57df14f8b633db21b6048179cd7	dried oily wastewater reservoirs; enzyme; functional gene; illumina high-throughput sequencing; microbial community	English	Article	Final		Scopus	2-s2.0-85060922262
Bao X., Wang Y., Olsson P.A.	57189516139;36496273200;35509847500;	Arbuscular mycorrhiza under water — Carbon‒phosphorus exchange between rice and arbuscular mycorrhizal fungi under different flooding regimes	2019	Soil Biology and Biochemistry	27	10.1016/j.soilbio.2018.11.020	https://www.scopus.com/inward/record.uri?eid=2-s2.0-85059320040&doi=10.1016%2fj.soilbio.2018.11.020&partnerID=40&md5=aebd62582dc5fdffa97e12e930cb93ca	Arbuscular mycorrhizal fungi (AMF); Carbon‒; Flooding; Growth (development) stage; Phosphorus exchange; Rice (Oryza sativa L.); Wetland	English	Article	Final		Scopus	2-s2.0-85059320040
Qu Y., Zhao H., Nobrega D.B., Cobo E.R., Han B., Zhao Z., Li S., Li M., Barkema H.W., Gao J.	57205188401;57205189979;39262205200;7005793465;35310342500;57205191279;49861774500;57205191338;7005859347;57157839200;	Molecular epidemiology and distribution of antimicrobial resistance genes of Staphylococcus species isolated from Chinese dairy cows with clinical mastitis	2019	Journal of Dairy Science	27	10.3168/jds.2018-15136	https://www.scopus.com/inward/record.uri?eid=2-s2.0-85058929671&doi=10.3168%2fjds.2018-15136&partnerID=40&md5=0cacbb4d0853a85e49b977a91dfe60ab	antimicrobial resistance gene; bovine mastitis; non-aureus staphylococci; random amplification of polymorphic DNA; Staphylococcus aureus	English	Article	Final	All Open Access, Bronze	Scopus	2-s2.0-85058929671
Yang Y., Liu G., Song W., Ye C., Lin H., Li Z., Liu W.	36919727400;55706483500;55219959300;57203615561;55637780200;56604388900;35867247800;	Plastics in the marine environment are reservoirs for antibiotic and metal resistance genes	2019	Environment International	195	10.1016/j.envint.2018.11.061	https://www.scopus.com/inward/record.uri?eid=2-s2.0-85057214665&doi=10.1016%2fj.envint.2018.11.061&partnerID=40&md5=c5725781c0053c6840180b3f87d69666	Macroplastics; Metagenomic analysis; Microplastics; Pacific Ocean; Resistance genes	English	Article	Final	All Open Access, Gold, Green	Scopus	2-s2.0-85057214665
Huang X., Wang J., Ma C., Ma L., Qiao C.	57192396854;56470646500;57202090423;57204733321;57202090393;	Diversity analysis of microbial communities and biodegradation performance of two halotolerant and thermotolerant Bacillus licheniformis strains in oilfield-produced wastewater	2019	International Biodeterioration and Biodegradation	3	10.1016/j.ibiod.2018.11.004	https://www.scopus.com/inward/record.uri?eid=2-s2.0-85056830229&doi=10.1016%2fj.ibiod.2018.11.004&partnerID=40&md5=9cf087c4c0fd329fa3cca249395c1874	Bacillus licheniformis; Halotolerant and thermotolerant microbes; Microbiota structure; Oilfield-produced wastewater (OPW); Petroleum hydrocarbon	English	Article	Final		Scopus	2-s2.0-85056830229
Lee Y.-H., Tung K.-C., Cheng J.-F., Wu Z.-Y., Chen S.-Y., Hong Y.-K., Huang Y.-T., Liu P.-Y.	57201740180;7102202023;35247565000;56057784500;57202717817;57202713768;55778141133;26326421500;	Genomic characterization of carbapenem-resistant Shewanella algae isolated from Asian hard clam (Meretrix lusoria)	2019	Aquaculture	8	10.1016/j.aquaculture.2018.10.028	https://www.scopus.com/inward/record.uri?eid=2-s2.0-85055113606&doi=10.1016%2fj.aquaculture.2018.10.028&partnerID=40&md5=01e0dd993cbf74ea9af6f26384cfe175	Bivalvia; Carbapenem-resistance; Shewanella algae; Whole-genome sequencing	English	Article	Final		Scopus	2-s2.0-85055113606
Li B., Liu X., Dinesh K., Duan Z., Sharma G.	57191924185;57194876890;56252200200;24450312900;7202756906;	Creating a Multitrack Classical Music Performance Dataset for Multimodal Music Analysis: Challenges, Insights, and Applications	2019	IEEE Transactions on Multimedia	44	10.1109/TMM.2018.2856090	https://www.scopus.com/inward/record.uri?eid=2-s2.0-85049977051&doi=10.1109%2fTMM.2018.2856090&partnerID=40&md5=1b8208ce1cd5a09d827ffe3cebc10951	audio-visual analysis; Multimodal music dataset; music performance; synchronization	English	Article	Final	All Open Access, Bronze, Green	Scopus	2-s2.0-85049977051
Larik I.A., Qazi M.A., Phulpoto A.H., Haleem A., Ahmed S., Kanhar N.A.	57189442072;56190097800;57028449000;57201391046;7402715588;25960990300;	Stenotrophomonas maltophilia strain 5DMD: an efficient biosurfactant-producing bacterium for biodegradation of diesel oil and used engine oil	2019	International Journal of Environmental Science and Technology	21	10.1007/s13762-018-1666-2	https://www.scopus.com/inward/record.uri?eid=2-s2.0-85043697010&doi=10.1007%2fs13762-018-1666-2&partnerID=40&md5=5ae8a671500742ffce48aad0dadb006d	Bioremediation; Hydrocarbons; Lipases; Oil displacement; Petrochemicals; Surface tension	English	Article	Final		Scopus	2-s2.0-85043697010
Lee S., Karava P., Tzempelikos A., Bilionis I.	57193857533;15757478500;9039355700;54998002300;	Inference of thermal preference profiles for personalized thermal environments with actual building occupants	2019	Building and Environment	42	10.1016/j.buildenv.2018.10.027	https://www.scopus.com/inward/record.uri?eid=2-s2.0-85058028277&doi=10.1016%2fj.buildenv.2018.10.027&partnerID=40&md5=d4b30988596d97d386549e823a33f91d	Bayesian modeling; Model evaluation; Office buildings; Personalized thermal comfort; Thermal preference	English	Article	Final	All Open Access, Bronze	Scopus	2-s2.0-85058028277
Fauvel B., Cauchie H.-M., Gantzer C., Ogorzaly L.	57163531800;6603153840;7005755178;15064182700;	Influence of physico-chemical characteristics of sediment on the in situ spatial distribution of F-specific RNA phages in the riverbed	2019	FEMS Microbiology Ecology	7	10.1093/femsec/fiy240	https://www.scopus.com/inward/record.uri?eid=2-s2.0-85060007715&doi=10.1093%2ffemsec%2ffiy240&partnerID=40&md5=4b445fb54b27bc0a410618c0f22e21ea	F-specific RNA bacteriophages; In situ spatial distribution; mineralogical composition; riverbed sediment	English	Article	Final	All Open Access, Hybrid Gold, Green	Scopus	2-s2.0-85060007715
Savona M.T., Morrison H.G.	57206659019;7103158481;	Extraction and Analysis of DNA from Phytoplankton Samples Acquired Offshore the Outer Banks of North Carolina (2016-2018)	2019	OCEANS 2018 MTS/IEEE Charleston, OCEAN 2018		10.1109/OCEANS.2018.8604507	https://www.scopus.com/inward/record.uri?eid=2-s2.0-85061766941&doi=10.1109%2fOCEANS.2018.8604507&partnerID=40&md5=3eb9c29920a42e24b7afa2a133f4ae8b	Algal bloom; DNA sequencing; Marker gene; Phytoplankton; Vibrio	English	Conference Paper	Final		Scopus	2-s2.0-85061766941
Wang J., Lin W., Yin Z., Wang L., Dong S., An J., Lin Z., Yu H., Shi L., Lin S., Chen S.	55742729700;57205353774;55543202500;35270258400;56067615700;56478057900;57191665367;55094818900;36610914600;8308817800;55733371900;	Comprehensive evaluation of fuel properties and complex regulation of intracellular transporters for high oil production in developing seeds of Prunus sibirica for woody biodiesel 06 Biological Sciences 0607 Plant Biology	2019	Biotechnology for Biofuels	3	10.1186/s13068-018-1347-x	https://www.scopus.com/inward/record.uri?eid=2-s2.0-85059701923&doi=10.1186%2fs13068-018-1347-x&partnerID=40&md5=131b980785261d3e91c17497bd765468	Biodiesel fuel properties; Differential transcript profiles; Intracellular transporter; Oil synthesis; Prunus sibirica seeds; Transporter-mediated mechanism	English	Article	Final	All Open Access, Gold, Green	Scopus	2-s2.0-85059701923
Govil T., Rathinam N.K., Salem D.R., Sani R.K.	57204483872;57924648000;57195001991;7005555107;	Taxonomical Diversity of Extremophiles in the Deep Biosphere	2019	Microbial Diversity in the Genomic Era	1	10.1016/B978-0-12-814849-5.00035-6	https://www.scopus.com/inward/record.uri?eid=2-s2.0-85120055057&doi=10.1016%2fB978-0-12-814849-5.00035-6&partnerID=40&md5=9cf9fca6a8b6da3a29d5ff1529c60d12	deep biosphere; Limit of life; microbial activity; microorganisms activity; ongoing research activity; subsurface life	English	Book Chapter	Final		Scopus	2-s2.0-85120055057
Thirugnanasambandan T.	50162351800;	Nanomaterials in Microbial Fuel Cells and Related Applications	2019	Nanotechnology in the Life Sciences		10.1007/978-3-030-16383-9_13	https://www.scopus.com/inward/record.uri?eid=2-s2.0-85101629444&doi=10.1007%2f978-3-030-16383-9_13&partnerID=40&md5=2c37d440201059921ba01c8a7e5fe5a1	Biocatalysts; Biocathode; Biofilms; Biogenic inorganic nanoparticles; Microbial fuel cell; Microfabrication; Nanocomposites; Nanomaterials; Proton-exchange membranes; Wastewater treatment	English	Book Chapter	Final		Scopus	2-s2.0-85101629444
Aasi Al-Mehmdi M.D., Al-Rawi D.F.A.-Q.	57220575995;57224449152;	DETERMINATION OF OPTIMAL CONDITIONS FOR THE PRODUCTION OF SINGLE CELL PROTEIN (SCP) BY PSEUDOMONAS AERUGINOSA BACTERIA USING HYDROCARBON RESIDUES (USED MOTOR OIL)	2019	Biochemical and Cellular Archives		10.35124/bca.2019.19.2.4323	https://www.scopus.com/inward/record.uri?eid=2-s2.0-85097366697&doi=10.35124%2fbca.2019.19.2.4323&partnerID=40&md5=a8f40c1f4ec131696fcd5deef625060a	biodegradation; hydrocarbon residues; Pseudomonas aeruginosa; SCP; used motor oil	English	Article	Final		Scopus	2-s2.0-85097366697
Rostami A., Shokrollahi A., Shahbazi K., Ghazanfari M.H.	57188924492;6603854987;14061246600;17343673900;	Application of a new approach for modeling the oil field formation damage due to mineral scaling	2019	Oil and Gas Science and Technology	10	10.2516/ogst/2019032	https://www.scopus.com/inward/record.uri?eid=2-s2.0-85097350988&doi=10.2516%2fogst%2f2019032&partnerID=40&md5=0b08d6bce8ab966b23ebfcd859750e9a		English	Article	Final	All Open Access, Gold, Green	Scopus	2-s2.0-85097350988
Jiang J., Chen K., Li W., Xia G.	57217331141;57214859448;56209264100;57208212250;	Large-vocabulary chord transcription via chord structure decomposition	2019	Proceedings of the 20th International Society for Music Information Retrieval Conference, ISMIR 2019	8		https://www.scopus.com/inward/record.uri?eid=2-s2.0-85087096760&partnerID=40&md5=b35e745d612d917cf77160dee0519d8a		English	Conference Paper	Final		Scopus	2-s2.0-85087096760
Son D., Louazel P., Yu B.	56419383000;57215307682;56017605500;	Effect of nacelle drag on the performance of a floating wind turbine platform	2019	ASME 2019 2nd International Offshore Wind Technical Conference, IOWTC 2019		10.1115/IOWTC2019-7595	https://www.scopus.com/inward/record.uri?eid=2-s2.0-85084161136&doi=10.1115%2fIOWTC2019-7595&partnerID=40&md5=6b43df7fcb0e085e32ebf0e0bedf0a89		English	Conference Paper	Final		Scopus	2-s2.0-85084161136
Chang W., Lee A.H., Kim J.	36015067500;57190135372;56801247000;	Potential hybridization of bioremediation and desalination: A preliminary study for salt-tolerant bacteria	2019	Proceedings, Annual Conference - Canadian Society for Civil Engineering			https://www.scopus.com/inward/record.uri?eid=2-s2.0-85080883074&partnerID=40&md5=6fd0b0791d7cc3887cd04cd85415f9c5		English	Conference Paper	Final		Scopus	2-s2.0-85080883074
Tremblay J., Greer C.W.	57211528413;7103169832;	Metagenomic data mining in oil spill studies	2019	Comprehensive Biotechnology	3	10.1016/B978-0-444-64046-8.00480-8	https://www.scopus.com/inward/record.uri?eid=2-s2.0-85079550693&doi=10.1016%2fB978-0-444-64046-8.00480-8&partnerID=40&md5=e0b6694bbca47fcd6cf0d50bcc5673d1	Alkane; Alkb; Bioinformatics; Genome-resolved metagenomics; High-throughput sequencing; Metagenomic binning; Metagenomics; Metatranscriptomics; Oil spill	English	Book Chapter	Final		Scopus	2-s2.0-85079550693
Demeter M., Wornstaff V., Wiggins C., Maley D.	55947757300;56241859300;57526234500;37075037900;	A comprehensive microbial assessment of hydraulic fracturing stimulations using state-of-the-art molecular methods: Three western-Canadian case studies	2019	Proceedings - SPE Annual Technical Conference and Exhibition	1	10.2118/195995-ms	https://www.scopus.com/inward/record.uri?eid=2-s2.0-85079152537&doi=10.2118%2f195995-ms&partnerID=40&md5=bb2d6732b890e9eae3522820b83b4f81		English	Conference Paper	Final		Scopus	2-s2.0-85079152537
Tijerina-Rodríguez L., Villarreal-Treviño L., Morfín-Otero R., Camacho-Ortíz A., Garza-González E.	57204088629;6507741482;55989716200;22940240400;6603391592;	Virulence Factors of Clostridioides (Clostridium) difficile Linked to Recurrent Infections	2019	Canadian Journal of Infectious Diseases and Medical Microbiology	7	10.1155/2019/7127850	https://www.scopus.com/inward/record.uri?eid=2-s2.0-85077808632&doi=10.1155%2f2019%2f7127850&partnerID=40&md5=e8fb0a75ad6e400d7886501b1f8a258f		English	Review	Final	All Open Access, Gold, Green	Scopus	2-s2.0-85077808632
Khan H.Y., Tabassum S., Arjmand F.	57204896396;56187509800;6603631114;	Evaluation of cytotoxic potential of structurally well-characterized RNA targeted ionic non-steroidal anti-inflammatory (NSAID) Cu(ii) & Zn(ii) DACH-mefenamato drug conjugates against human cancer cell lines	2019	RSC Advances	20	10.1039/c9ra07464c	https://www.scopus.com/inward/record.uri?eid=2-s2.0-85077510627&doi=10.1039%2fc9ra07464c&partnerID=40&md5=af9f757bf998de443933a3a764799c66		English	Article	Final	All Open Access, Gold, Green	Scopus	2-s2.0-85077510627
Zhang X., Tu B., Lv X.-M., Lawson P.A., Yang M., Dai L.-R., Zhang H., Tang Y.-Q., Deng Y., Cheng L.	57203327206;57220475457;57212155345;7103001310;57212156524;48761048200;56909425200;8956229300;55261845800;57118601200;	Description of biomaibacter acetigenes gen. Nov., sp. Nov., and proposal of thermosediminibacterales ord. nov. containing two novel families of tepidanaerobacteraceae fam. Nov. And thermosediminibacteraceae fam. Nov.	2019	International Journal of Systematic and Evolutionary Microbiology	2	10.1099/ijsem.0.003701	https://www.scopus.com/inward/record.uri?eid=2-s2.0-85076066704&doi=10.1099%2fijsem.0.003701&partnerID=40&md5=df78386f67b6dd9e3bcc451b53b54599	Biomaibacter acetigenes; Phylogenomic analysis; Tepidanaerobacteraceae; Thermoanaerobacterales; Thermosediminibacteraceae; Thermosediminibacterales	English	Article	Final	All Open Access, Bronze	Scopus	2-s2.0-85076066704
Popko W., Robertson A., Jonkman J., Wendt F., Thomas P., Müller K., Kretschmer M., Hagen T.R., Galinos C., Le Dreff J.-B., Gilbert P., Auriac B., Oh S., Qvist J., Sørum S.H., Suja-Thauvin L., Shin H., Molins C., Trubat P., Bonnet P., Bergua R., Wang K., Fu P., Cai J., Cai Z., Alexandre A., Harries R.	55355419200;7403044186;19934004300;56732685900;57191205333;57191272255;56912028600;52063270600;57191953991;57215529678;57198010845;57204395632;57198898898;56421885100;57200218474;57191196012;7404012326;6701525912;56971453300;57206565880;56578541700;57221120705;57204391434;57204394173;57212092190;57002803500;56912095500;	Validation of numerical models of the offshore wind turbine from the Alpha ventus wind farm against full-scale measurements within OC5 phase III	2019	Proceedings of the International Conference on Offshore Mechanics and Arctic Engineering - OMAE	3	10.1115/OMAE2019-95429	https://www.scopus.com/inward/record.uri?eid=2-s2.0-85075879180&doi=10.1115%2fOMAE2019-95429&partnerID=40&md5=9a0f7ba562bbd858668a82f3dd36887a		English	Conference Paper	Final	All Open Access, Green	Scopus	2-s2.0-85075879180
Yoshimoto H., Kamizawa K.	57204359547;57203506273;	Validation of the motion analysis method of floating offshore wind turbines using observation data acquired by full scale demonstration project	2019	Proceedings of the International Conference on Offshore Mechanics and Arctic Engineering - OMAE	2	10.1115/OMAE2019-95828	https://www.scopus.com/inward/record.uri?eid=2-s2.0-85075837322&doi=10.1115%2fOMAE2019-95828&partnerID=40&md5=b4c2b40a927bdd5e389834e904849cc6	Coupling Analysis; Floating Offshore Wind Turbine; Motion; Observation Data; Verification	English	Conference Paper	Final		Scopus	2-s2.0-85075837322
Macfarlane G., Graham-Parker K., Connellan M.	14834108300;57203999742;57212048497;	The increase in wave wake characteristics of marine vessels when accelerating	2019	Proceedings of the International Conference on Offshore Mechanics and Arctic Engineering - OMAE		10.1115/OMAE2019-95337	https://www.scopus.com/inward/record.uri?eid=2-s2.0-85075810779&doi=10.1115%2fOMAE2019-95337&partnerID=40&md5=fff957087463d261317e3c84c8e9411e	Depth Froude number; ferry operations; monohull; catamaran; Experiments; Wave wake; wash; acceleration	English	Conference Paper	Final	All Open Access, Green	Scopus	2-s2.0-85075810779
Chang Y.-H., Tsai J.-N., Chen T.-L., Ho K.-T., Cheng H.-Y., Hsiao C.-W., Shiau M.-Y.	35368199100;36806365500;57212003134;16205282300;57212001245;57194052554;7004007206;	Interleukin-4 Promotes Myogenesis and Boosts Myocyte Insulin Efficacy	2019	Mediators of Inflammation	12	10.1155/2019/4182015	https://www.scopus.com/inward/record.uri?eid=2-s2.0-85075692580&doi=10.1155%2f2019%2f4182015&partnerID=40&md5=e3b26251f40e0a92e876b2ac780b9f9e		English	Article	Final	All Open Access, Gold, Green	Scopus	2-s2.0-85075692580
Bolaji T.A., Oti M.N., Abu G.O., Onyekonwu M.O.	57211575297;6602270990;8923175400;6602574344;	Biogenic sulfide production in offshore petroleum reservoirs undergoing waterflooding	2019	Petroleum and Coal	3		https://www.scopus.com/inward/record.uri?eid=2-s2.0-85074463092&partnerID=40&md5=7f5b074bd372bfb87fdb2b23c587d6a9	Biogenic sulfide; Oilfield; Reservoir; Souring; Sulfate-reducing Prokaryotes; Waterflooding	English	Review	Final		Scopus	2-s2.0-85074463092
Gao P., Wang H., Li G., Ma T.	45960926300;55711843000;57207568484;55728800200;	Low-Abundance Dietzia Inhabiting a Water-Flooding Oil Reservoir and the Application Potential for Oil Recovery	2019	BioMed Research International	3	10.1155/2019/2193453	https://www.scopus.com/inward/record.uri?eid=2-s2.0-85073635008&doi=10.1155%2f2019%2f2193453&partnerID=40&md5=f4fc063356c8ba3ee463d68838b88ac7		English	Article	Final	All Open Access, Gold, Green	Scopus	2-s2.0-85073635008
Go L.C., Holmes W., Depan D., Hernandez R.	57210206460;35810540800;9250226600;7201510535;	Evaluation of extracellular polymeric substances extracted from waste activated sludge as a renewable corrosion inhibitor	2019	PeerJ	10	10.7717/peerj.7193	https://www.scopus.com/inward/record.uri?eid=2-s2.0-85073195503&doi=10.7717%2fpeerj.7193&partnerID=40&md5=edfc97d27a3cbf84f56ae9fdb5483d47	Adsorption; Corrosion inhibitor; Extracellular polymeric substances; Waste activated sludge	English	Article	Final	All Open Access, Gold, Green	Scopus	2-s2.0-85073195503
Riaz A., Ellahi R., Bhatti M.M., Marin M.	36470866300;6507752011;56898628100;7202222146;	Study of heat and mass transfer in the eyring-powell model of fluid propagating peristaltically through a rectangular compliant channel	2019	Heat Transfer Research	109	10.1615/HeatTransRes.2019025622	https://www.scopus.com/inward/record.uri?eid=2-s2.0-85072769081&doi=10.1615%2fHeatTransRes.2019025622&partnerID=40&md5=3ffafebfc659125c5632fabecb835843	Analytical solutions; Compliant walls; Eyring-Powell fl uid; Heat transfer; Peristaltic fl ow; Rectangular channel	English	Article	Final		Scopus	2-s2.0-85072769081
Semenova E.M., Sokolova D.S., Grouzdev D.S., Poltaraus A.B., Vinokurova N.G., Tourova T.P., Nazina T.N.	57214910623;6602552612;55683461500;56269272700;7006256043;6701637195;6603798988;	Geobacillus proteiniphilus sp. Nov., a thermophilic bacterium isolated from a high-temperature heavy oil reservoir in China	2019	International Journal of Systematic and Evolutionary Microbiology	7	10.1099/ijsem.0.003486	https://www.scopus.com/inward/record.uri?eid=2-s2.0-85072746484&doi=10.1099%2fijsem.0.003486&partnerID=40&md5=372e9a128ac1f51d105540a8cda41561	Geobacillus proteiniphilus sp. nov; Oilfield; Phylogenomic analysis; Polyphasic taxonomy	English	Article	Final	All Open Access, Bronze	Scopus	2-s2.0-85072746484
Kamari A., Sattari M., Mohammadi A.H., Ramjugernath D.	56532174100;56757676600;15127641000;6701853255;	Improved methods for the determination of viscosities of dead, saturated, and under-saturated reservoir oils	2019	Petroleum and Coal			https://www.scopus.com/inward/record.uri?eid=2-s2.0-85072516895&partnerID=40&md5=52e140932f30d138d66a4dc837979ac2	Empirical correlation; Enhanced oil recovery (EOR); Gene expression programming (GEP); Pressure region; Viscosity	English	Article	Final		Scopus	2-s2.0-85072516895
Laso-Pérez R., Hahn C., Van Vliet D.M., Tegetmeyer H.E., Schubotz F., Smit N.T., Pape T., Sahling H., Bohrmann G., Boetius A., Knittel K., Wegenera G.	57192009611;57210817916;57205754929;23026261700;24074843600;57209703256;56260185500;6602708335;7004562648;6701454625;6506168750;23768265000;	Anaerobic degradation of non-methane alkanes by “candidatus methanoliparia” in hydrocarbon seeps of the gulf of Mexico	2019	mBio	36	10.1128/mBio.01814-19	https://www.scopus.com/inward/record.uri?eid=2-s2.0-85071570977&doi=10.1128%2fmBio.01814-19&partnerID=40&md5=f6709c540522c6fe5dc2bd77e7891465	Alkane degradation; Archaea; Methanogenesis; Methyl-coenzyme m reductase; Oil seeps	English	Article	Final	All Open Access, Gold, Green	Scopus	2-s2.0-85071570977
Kamari A., Sattari M., Mohammadi A.H., Ramjugernath D.	56532174100;56757676600;15127641000;6701853255;	Improved models for the estimation of PVT properties of crude oils	2019	Petroleum and Coal			https://www.scopus.com/inward/record.uri?eid=2-s2.0-85071387057&partnerID=40&md5=456ca00ce36ebf23aa6fe4aa963180a0	Accuracy; Bubble point pressure; Empirical correlation; Gene expression programming (GEP); Oil formation volume factor; PVT properties	English	Article	Final		Scopus	2-s2.0-85071387057
Salgar-Chaparro S.J., Machuca L.L., Lepkova K., Pojtanabuntoeng T., Darwin A.	57090962300;43861654600;8582682700;42262609500;36174873500;	Investigating the effect of temperature in the community structure of an oilfield microbial consortium, and its impact on corrosion of carbon steel	2019	NACE - International Corrosion Conference Series	1		https://www.scopus.com/inward/record.uri?eid=2-s2.0-85070064496&partnerID=40&md5=7d9521d79653552bb45ecb48fdc3df94	16S rRNA profiling; DNA; Mesophiles; Microbiologically Influenced Corrosion (MIC); RNA; Thermophile	English	Conference Paper	Final		Scopus	2-s2.0-85070064496
Manna K., Moore J., Wunch K., Massie-Schuh E., Daly R.A., Wrighton K., Wilkins M.	57191953922;56015928000;16235590800;56429661600;7103342093;25638073200;14017109200;	Relative performance of various 16S ITAG amplicon sequencing primer pairs in profiling microbial communities relevant to oil & gas operations	2019	NACE - International Corrosion Conference Series			https://www.scopus.com/inward/record.uri?eid=2-s2.0-85070060337&partnerID=40&md5=c65f15f04cbb61931fcdfa309d2bfa7b	16S rRNA; Bacteria; Community profiling; Metagenomics; Molecular techniques	English	Conference Paper	Final		Scopus	2-s2.0-85070060337
Arredondo A., Àlvarez G., Nart J., Mor C., Blanc V., León R.	56702410100;56090124200;18038044800;57205715763;42661035800;15741199000;	Detection and expression analysis of tet(B) in Streptococcus oralis	2019	Journal of Oral Microbiology	8	10.1080/20002297.2019.1643204	https://www.scopus.com/inward/record.uri?eid=2-s2.0-85069786569&doi=10.1080%2f20002297.2019.1643204&partnerID=40&md5=fa7c2380bff250729b6c8f5bf1893089	antibiotic resistance; gene expression; horizontal gene transfer; Streptococcus oralis; tet(B); Tetracycline	English	Article	Final	All Open Access, Gold, Green	Scopus	2-s2.0-85069786569
Roalkvam I., Drønen K., Dahle H., Wergeland H.I.	42862335600;6507077644;14044487500;6701692516;	Microbial communities in a flow-through fish farm for lumpfish (Cyclopterus lumpus L.) during healthy rearing conditions	2019	Frontiers in Microbiology	15	10.3389/fmicb.2019.01594	https://www.scopus.com/inward/record.uri?eid=2-s2.0-85069520812&doi=10.3389%2ffmicb.2019.01594&partnerID=40&md5=b5fac010137be9ef7b9f59de0177a778	Amplicon; Aquaculture; Cyclopterus lumpus; Fish farm; Fish pathogens; Flow-thorough; Lumpfish; Microbial community	English	Article	Final	All Open Access, Gold, Green	Scopus	2-s2.0-85069520812
Neiger M.R., González J.F., Gonzalez-Escobedo G., Kuck H., White P., Gunn J.S.	57209576181;56237625500;36154563400;55681881700;57204282849;7201609041;	Pathoadaptive alteration of Salmonella biofilm formation in response to the gallbladder environment	2019	Journal of Bacteriology	13	10.1128/JB.00774-18	https://www.scopus.com/inward/record.uri?eid=2-s2.0-85068154845&doi=10.1128%2fJB.00774-18&partnerID=40&md5=c34000e8ae5595c71b4ebd379bbd9700	Biofilms; Chronic carriage; Gallbladder; Salmonella	English	Conference Paper	Final	All Open Access, Green	Scopus	2-s2.0-85068154845
Su H., Mi S., Peng X., Han Y.	56808581800;56195725300;23968190100;18041679000;	The mutual influence between corrosion and the surrounding soil microbial communities of buried petroleum pipelines	2019	RSC Advances	14	10.1039/c9ra03386f	https://www.scopus.com/inward/record.uri?eid=2-s2.0-85068112436&doi=10.1039%2fc9ra03386f&partnerID=40&md5=2f4c1ea1484e09c1114f5056f241e43a		English	Article	Final	All Open Access, Gold, Green	Scopus	2-s2.0-85068112436
Hofmann A., van Strien W.J.	55818737400;57200380654;	Maintaining well & facility health – The application of DNA analysis to corrosion and bio-fouling prevention	2019	Offshore Mediterranean Conference and Exhibition 2019, OMC 2019	1		https://www.scopus.com/inward/record.uri?eid=2-s2.0-85066797000&partnerID=40&md5=b7a8a3e198362ce8f499c3b06df4c91b		English	Conference Paper	Final		Scopus	2-s2.0-85066797000
Udoh I.E., Zou J.	39362720200;57212626719;	Driving down cost: A case study of floating substructure for a 10MW wind turbine	2019	Proceedings of the Annual Offshore Technology Conference	2	10.4043/29344-ms	https://www.scopus.com/inward/record.uri?eid=2-s2.0-85066606328&doi=10.4043%2f29344-ms&partnerID=40&md5=28dea51ec6d705e4c2a92534cf3080ef		English	Conference Paper	Final		Scopus	2-s2.0-85066606328
Kato S., Wada K., Kitagawa W., Mayumi D., Ikarashi M., Sone T., Asano K., Kamagata Y.	26663576300;57208160714;7004162650;24169484400;35976203600;7103284541;55523429400;16211722800;	Conductive iron oxides promote methanogenic acetate degradation by microbial communities in a high-temperature petroleum reservoir	2019	Microbes and Environments	10	10.1264/jsme2.ME18140	https://www.scopus.com/inward/record.uri?eid=2-s2.0-85063997766&doi=10.1264%2fjsme2.ME18140&partnerID=40&md5=dc864208dd70c3bbfa36a1d4b2cb3a49	Electric syntrophy; Iron oxides; Methanogenesis; Microbial enhanced oil recovery; Petroleum reservoir	English	Article	Final	All Open Access, Bronze, Green	Scopus	2-s2.0-85063997766
Espinoza R., Thatcher J., Eldred M.	57127776900;57205435009;57205442891;	Turning an offshore analog field into digital using artificial intelligence	2019	SPE Middle East Oil and Gas Show and Conference, MEOS, Proceedings	1	10.2118/195027-ms	https://www.scopus.com/inward/record.uri?eid=2-s2.0-85063800462&doi=10.2118%2f195027-ms&partnerID=40&md5=b871e827671a70c5306eb627ecd4ab4c		English	Conference Paper	Final		Scopus	2-s2.0-85063800462
Noshi C.I., Schubert J.J.	57203913312;7201687845;	A novel microbially induced self-healing cement/concrete for underwater concrete offshore structures	2019	SPE/IADC Drilling Conference, Proceedings	2	10.2118/194173-ms	https://www.scopus.com/inward/record.uri?eid=2-s2.0-85063125923&doi=10.2118%2f194173-ms&partnerID=40&md5=00f7d4ef48f1c2d96e90e670e4d55fa2		English	Conference Paper	Final		Scopus	2-s2.0-85063125923
Hopkins T., Schuler A.	57205271419;7005367271;	Title: Growth of algae for biofuel production in highly saline oilfield fracking wastewater	2019	91st Annual Water Environment Federation Technical Exhibition and Conference, WEFTEC 2018			https://www.scopus.com/inward/record.uri?eid=2-s2.0-85060809153&partnerID=40&md5=bf0f18d088e64219a7062f51f897a877	Biofuel; Dunaliella tertiolecta; Lipids; Nutrients; Polyculture; Produced water; Salinity	English	Conference Paper	Final		Scopus	2-s2.0-85060809153
Farfán M., Lártiga N., Benavides M.B., Alegría-Morán R., Sáenz L., Salcedo C., Lapierre L.	6602174865;57205571254;57205587395;57190033262;7003750772;57205581489;24463380200;	Capacity to adhere to and invade human epithelial cells, as related to the presence of virulence genes in, motility of, and biofilm formation of campylobacter jejuni strains isolated from chicken and cattle	2019	Canadian Journal of Microbiology	5	10.1139/cjm-2018-0503	https://www.scopus.com/inward/record.uri?eid=2-s2.0-85060621353&doi=10.1139%2fcjm-2018-0503&partnerID=40&md5=2f3193e870ffd9ca8d593b4faf59879a	Adhesion; Campylobacter jejuni; Invasion; Virulence; Zoonoses	English	Article	Final		Scopus	2-s2.0-85060621353
Kocabiyikoglu A.C., Besacier L., Kraif O.	57204048798;6603620416;26631963900;	Augmenting Librispeech with French translations: A multimodal corpus for direct speech translation evaluation	2019	LREC 2018 - 11th International Conference on Language Resources and Evaluation	21		https://www.scopus.com/inward/record.uri?eid=2-s2.0-85059911485&partnerID=40&md5=8c76870df24395a468c82a8035a82233	Bilingual alignment; Direct speech translation; Librispeech corpus	English	Conference Paper	Final		Scopus	2-s2.0-85059911485
Farag E., Sikkema R.S., Vinks T., Mazharul Islam M., Nour M., Al-Romaihi H., Al Thani M., Atta M., Alhajri F.H., Al-Marri S., Alhajri M., Reusken C., Koopmans M.	55963332900;25923062900;57205310611;57131418200;57200036649;55963882100;36969541400;14012778400;55963851700;14520560900;55963202700;6602366009;7006736989;	Drivers of mers-cov emergence in Qatar	2019	Viruses	12	10.3390/v11010022	https://www.scopus.com/inward/record.uri?eid=2-s2.0-85059498963&doi=10.3390%2fv11010022&partnerID=40&md5=0b84417ee6adaa75f653fc1208008b94	Drivers; MERS-CoV; Qatar	English	Review	Final	All Open Access, Gold, Green	Scopus	2-s2.0-85059498963
Wang T., Hu C., Zhang R., Sun A., Li D., Shi X.	57204471811;56012456500;56438258400;36698482800;37091102300;56403676400;	Mechanism study of cyfluthrin biodegradation by Photobacterium ganghwense with comparative metabolomics	2019	Applied Microbiology and Biotechnology	16	10.1007/s00253-018-9458-7	https://www.scopus.com/inward/record.uri?eid=2-s2.0-85055683682&doi=10.1007%2fs00253-018-9458-7&partnerID=40&md5=e57cc491f9ea8cf6e4e19efb17f64aac	Biodegradation; Biotransformation; Cyfluthrin; Metabolomics; Microbiology	English	Article	Final		Scopus	2-s2.0-85055683682
Flores S.S., Nolan V., Perillo M.A., Sánchez J.M.	57204425696;8629415400;7003427647;7403997838;	Superactive β-galactosidase inclusion bodies	2019	Colloids and Surfaces B: Biointerfaces	9	10.1016/j.colsurfb.2018.10.049	https://www.scopus.com/inward/record.uri?eid=2-s2.0-85055540130&doi=10.1016%2fj.colsurfb.2018.10.049&partnerID=40&md5=1e289bf51b6afa3ff7e7094c2daeeafb	Catalytic activity; Inclusion bodies; Protein desorption process; β-Galactosidase	English	Article	Final		Scopus	2-s2.0-85055540130
Xu D., Zhang K., Li B.-G., Mbadinga S.M., Zhou L., Liu J.-F., Yang S.-Z., Gu J.-D., Mu B.-Z.	57206958973;57201773350;15837060900;36802004800;55710625100;36096880500;8719114200;7403129601;55509556000;	Simulation of in situ oil reservoir conditions in a laboratory bioreactor testing for methanogenic conversion of crude oil and analysis of the microbial community	2019	International Biodeterioration and Biodegradation	9	10.1016/j.ibiod.2018.10.007	https://www.scopus.com/inward/record.uri?eid=2-s2.0-85055180367&doi=10.1016%2fj.ibiod.2018.10.007&partnerID=40&md5=a641f0e288babf23230c4870c137711d	Bioreactor; Methanogenesis; Microbial community; Microbial enhanced energy recovery; Oil reservoir	English	Article	Final		Scopus	2-s2.0-85055180367
Katayama T., Yoshioka H., Yamanaka T., Takeuchi M., Muramoto Y., Usami J., Ikeda H., Sakata S.	16241333300;7401586504;35235854100;7402804627;56211394500;57191389003;57201876676;7202519042;	Microbial community structure in deep natural gas-bearing aquifers subjected to sulfate-containing fluid injection	2019	Journal of Bioscience and Bioengineering	1	10.1016/j.jbiosc.2018.06.013	https://www.scopus.com/inward/record.uri?eid=2-s2.0-85050873433&doi=10.1016%2fj.jbiosc.2018.06.013&partnerID=40&md5=d42d62baa57dd18fe5ea5d93c39314c5	Amplicon pyrosequencing; Deep biosphere; Microbial corrosion; Sedimentary saline aquifer; Sulfate reduction; Sulfur oxidation	English	Article	Final		Scopus	2-s2.0-85050873433
Lhotska L., Stechova K., Hlúbik J.	6603798512;6603038562;23469668500;	Improving prediction of glycaemia course after different meals—New individualized approach	2019	IFMBE Proceedings		10.1007/978-981-10-9023-3_137	https://www.scopus.com/inward/record.uri?eid=2-s2.0-85048305949&doi=10.1007%2f978-981-10-9023-3_137&partnerID=40&md5=38a2f45c4a54c331a98eee6719335027	Diabetes; Glycaemia course; Individualization; Metabolism	English	Conference Paper	Final		Scopus	2-s2.0-85048305949
Li Z., Lin J., Qian Q., Feng Y., Wang L., Wang W., Li X.	57205589339;56331723200;57205574263;57195439660;57205581613;56969961600;35302874400;	Study on anaerobic growth metabolism of a Bacillus licheniformis strain [一株采油用地衣芽孢杆菌厌氧生长代谢]	2018	Zhongguo Shiyou Daxue Xuebao (Ziran Kexue Ban)/Journal of China University of Petroleum (Edition of Natural Science)	1	10.3969/j.issn.1673-5005.2018.06.021	https://www.scopus.com/inward/record.uri?eid=2-s2.0-85060641180&doi=10.3969%2fj.issn.1673-5005.2018.06.021&partnerID=40&md5=9ba89306aca33d0e354d75962a836d8f	Anaerobic growth metabolism; Bacillus; Electron acceptor; MEOR	Chinese	Article	Final		Scopus	2-s2.0-85060641180
Shriram V., Khare T., Bhagwat R., Shukla R., Kumar V.	20436406900;56045300700;57204666688;9437484300;7404634888;	Inhibiting bacterial drug efflux pumps via phyto-therapeutics to combat threatening antimicrobial resistance	2018	Frontiers in Microbiology	73	10.3389/fmicb.2018.02990	https://www.scopus.com/inward/record.uri?eid=2-s2.0-85058145550&doi=10.3389%2ffmicb.2018.02990&partnerID=40&md5=e6fa07754ebfb3d2edcbee7f4e95f447	Antimicrobial resistance; Drug resistance reversal; Efflux pump inhibitors; Efflux pumps; Phyto-therapeutics	English	Article	Final	All Open Access, Gold, Green	Scopus	2-s2.0-85058145550
Niederländer B., Blümler P., Brotin T., Van Dusschoten D., Offenhäusser A., Krause H.-J., Heil W.	57204907805;55932414900;6602880945;6701410687;24491052600;36850162100;56256043700;	Optimized Continuous Application of Hyperpolarized Xenon to Liquids	2018	Journal of Physical Chemistry A	1	10.1021/acs.jpca.8b09479	https://www.scopus.com/inward/record.uri?eid=2-s2.0-85057778433&doi=10.1021%2facs.jpca.8b09479&partnerID=40&md5=69308654e45e8fe24bc1d3763d21b65a		English	Article	Final	All Open Access, Green	Scopus	2-s2.0-85057778433
Roscetto E., Contursi P., Vollaro A., Fusco S., Notomista E., Catania M.R.	25937446300;6506945202;57219219598;57222031604;6603172385;7004369035;	Antifungal and anti-biofilm activity of the first cryptic antimicrobial peptide from an archaeal protein against Candida spp. clinical isolates	2018	Scientific Reports	42	10.1038/s41598-018-35530-0	https://www.scopus.com/inward/record.uri?eid=2-s2.0-85057601243&doi=10.1038%2fs41598-018-35530-0&partnerID=40&md5=540b61efb6d9613949778ef20c83099f		English	Article	Final	All Open Access, Gold, Green	Scopus	2-s2.0-85057601243
Hossain S., De Silva B.C.J., Dahanayake P.S., Heo G.-J.	57192540727;57195722397;57202253401;7006264222;	Characterization of virulence properties and multi-drug resistance profiles in motile Aeromonas spp. isolated from zebrafish (Danio rerio)	2018	Letters in Applied Microbiology	19	10.1111/lam.13075	https://www.scopus.com/inward/record.uri?eid=2-s2.0-85056276563&doi=10.1111%2flam.13075&partnerID=40&md5=0c6c449909098a51acb0a8f817451ce0	Aeromonas spp.; multi-drug resistance; phylogenetic tree; virulence properties; zebrafish	English	Article	Final		Scopus	2-s2.0-85056276563
Wood T.L., Gong T., Zhu L., Miller J., Miller D.S., Yin B., Wood T.K.	57202566165;57200968055;57196470275;57214125772;57196473641;42862843300;7402252757;	Rhamnolipids from Pseudomonas aeruginosa disperse the biofilms of sulfate-reducing bacteria	2018	npj Biofilms and Microbiomes	38	10.1038/s41522-018-0066-1	https://www.scopus.com/inward/record.uri?eid=2-s2.0-85054293487&doi=10.1038%2fs41522-018-0066-1&partnerID=40&md5=a8a5387921e49be2fa82647247523174		English	Article	Final	All Open Access, Gold, Green	Scopus	2-s2.0-85054293487
You J., Hong S., Yu J., Duan L., Liu B., Mu B., Zhou C., Xue Y.	57196002762;57203936468;57203943322;57203936099;56763040700;55509556000;53879248900;7402270781;	Coralloluteibacterium thermophilus sp. nov., A Gammaproteobacterium Isolated from an Oil Reservoir	2018	Current Microbiology	1	10.1007/s00284-018-1564-3	https://www.scopus.com/inward/record.uri?eid=2-s2.0-85053689641&doi=10.1007%2fs00284-018-1564-3&partnerID=40&md5=f81091a57c8dcc7fafddc7cb6ac9d0ef		English	Article	Final		Scopus	2-s2.0-85053689641
Zhong Z., Liu S., Kazemi M., Carr T.R.	57190252243;57202576640;57200766190;7103305358;	Dew point pressure prediction based on mixed-kernels-function support vector machine in gas-condensate reservoir	2018	Fuel	25	10.1016/j.fuel.2018.05.168	https://www.scopus.com/inward/record.uri?eid=2-s2.0-85048832755&doi=10.1016%2fj.fuel.2018.05.168&partnerID=40&md5=86636d96b6dafb27a1abac9142ea8c8e	Dew point pressure; Mixed kernel function; Particle swarm optimization; Support vector machine	English	Article	Final	All Open Access, Bronze	Scopus	2-s2.0-85048832755
Reyes-Sosa M.B., Apodaca-Hernández J.E., Arena-Ortiz M.L.	57202579416;57200013555;6604036719;	Bioprospecting for microbes with potential hydrocarbon remediation activity on the northwest coast of the Yucatan Peninsula, Mexico, using DNA sequencing	2018	Science of the Total Environment	16	10.1016/j.scitotenv.2018.06.097	https://www.scopus.com/inward/record.uri?eid=2-s2.0-85048738792&doi=10.1016%2fj.scitotenv.2018.06.097&partnerID=40&md5=b4ffa6a88711a905ee1350820eecfc78	Bacteria; Bioremediation; Freshwater upwellings; Hydrocarbons; Ocean; Wetlands	English	Review	Final	All Open Access, Bronze	Scopus	2-s2.0-85048738792
Vilcáez J., York J., Youssef N., Elshahed M.	16305969800;57202507879;10044729100;55907765000;	Stimulation of methanogenic crude oil biodegradation in depleted oil reservoirs	2018	Fuel	16	10.1016/j.fuel.2018.06.018	https://www.scopus.com/inward/record.uri?eid=2-s2.0-85048583684&doi=10.1016%2fj.fuel.2018.06.018&partnerID=40&md5=5be83b9d7b19702b314cbd8b08e9e205	CO2; Crude oil biodegradation; Depleted oil reservoirs; Methanogenesis; Protein-rich matter	English	Article	Final		Scopus	2-s2.0-85048583684
Nag Dasgupta C., Nayaka S., Toppo K., Singh A.K., Deshpande U., Mohapatra A.	36518591000;13007843100;14036515900;57206367088;57190272395;57204688594;	Draft genome sequence and detailed characterization of biofuel production by oleaginous microalga Scenedesmus quadricauda LWG002611 06 Biological Sciences 0604 Genetics	2018	Biotechnology for Biofuels	14	10.1186/s13068-018-1308-4	https://www.scopus.com/inward/record.uri?eid=2-s2.0-85056707286&doi=10.1186%2fs13068-018-1308-4&partnerID=40&md5=0670a83ea7b385130cfc7ce7d2507110	Biofuel; Draft genome sequence; Lipid metabolism; Metabolic pathways; Oleaginous microalgae; Phylogenetic analysis; Scenedesmus quadricauda	English	Article	Final	All Open Access, Gold, Green	Scopus	2-s2.0-85056707286
Phetcharat T., Dawkrajai P., Chitov T., Wongpornchai P., Saenton S., Mhuantong W., Kanokratana P., Champreda V., Bovonsombut S.	57204839810;12768514300;25228370700;16240292900;6507411765;33368154000;14013025300;12242766400;57188803732;	Effect of inorganic nutrients on bacterial community composition in oil-bearing sandstones from the subsurface strata of an onshore oil reservoir and its potential use in Microbial Enhanced Oil Recovery	2018	PLoS ONE	9	10.1371/journal.pone.0198050	https://www.scopus.com/inward/record.uri?eid=2-s2.0-85057501050&doi=10.1371%2fjournal.pone.0198050&partnerID=40&md5=62aea97cb8fe8a2c99503d2b303a61ca		English	Article	Final	All Open Access, Gold, Green	Scopus	2-s2.0-85057501050
Kimbell L.K., Kappell A.D., McNamara P.J.	57201550445;15055902400;57210528110;	Effect of pyrolysis on the removal of antibiotic resistance genes and class I integrons from municipal wastewater biosolids	2018	Environmental Science: Water Research and Technology	27	10.1039/c8ew00141c	https://www.scopus.com/inward/record.uri?eid=2-s2.0-85055860511&doi=10.1039%2fc8ew00141c&partnerID=40&md5=f08c49da1a24b213ae1b76fc09aeb95f		English	Article	Final	All Open Access, Green	Scopus	2-s2.0-85055860511
Liu C., Zhang R., Yang H., Zhang J., Wang H., Chang L., Zhan Y., Xu Q.	36716449000;37062433500;24072342100;55988990600;57170987800;57195563683;57195562519;55222769300;	Investigating the performance of an anaerobic baffled bioreactor for the biodegradation of alkaline-surfactant-polymer in oilfield water	2018	Environmental Technology (United Kingdom)	5	10.1080/09593330.2017.1364304	https://www.scopus.com/inward/record.uri?eid=2-s2.0-85028821798&doi=10.1080%2f09593330.2017.1364304&partnerID=40&md5=63fe0f6c3b89865ba6e7e55bdd4f527b	Anaerobic baffled bioreactor; biodegradation; oil concentration; oilfield flooding wastewater; suspended solids	English	Article	Final		Scopus	2-s2.0-85028821798
Govil T., Rathinam N.K., Salem D.R., Sani R.K.	57204483872;57224881369;57195001991;7005555107;	Taxonomical Diversity of Extremophiles in the Deep Biosphere	2018	Microbial Diversity in the Genomic Era	5	10.1016/B978-0-12-814849-5.00035-6	https://www.scopus.com/inward/record.uri?eid=2-s2.0-85074704447&doi=10.1016%2fB978-0-12-814849-5.00035-6&partnerID=40&md5=4977fcaea55a1e03957f393c5a9f90d9	Deep biosphere; Limit of life; Microbial activity; Microorganisms activity; Ongoing research activity; Subsurface life	English	Book Chapter	Final		Scopus	2-s2.0-85074704447
Yang C.-L., Yuan M.-Y., Shi R.-J., Yan P.-J., Zhao F., Han S.-Q., Zhang Y.	56176032900;57205204550;22958669200;57205207478;57201304059;14037325600;57196210679;	A Thermotolerant and Halotolerant Sulfate-reducing Bacterium in Produced Water from an Offshore High-temperature Oilfield in Bohai Bay, China: Isolation, Phenotypic Characterization, and Inhibition [海域高温油田1株耐高温耐盐硫酸盐还原菌的筛选与生理特性及活性抑制]	2018	Huanjing Kexue/Environmental Science	1	10.13227/j.hjkx.201802103	https://www.scopus.com/inward/record.uri?eid=2-s2.0-85059099571&doi=10.13227%2fj.hjkx.201802103&partnerID=40&md5=36b82e05621770d3ee29bd343c29c2b9	Biocide; Desulfovibrio vulgaris; Offshore oilfield; Souring; Sulfate-reducing prokaryotes; Sulfide hydrogen	Chinese	Article	Final		Scopus	2-s2.0-85059099571
Engelbrektson A., Briseno V., Liu Y., Figueroa I., Yee M., Li Shao G., Carlson H., Coates J.D.	21734358900;56090219100;57225003179;36764109100;57204315424;57204324146;55432591600;26035255400;	Mitigating sulfidogenesis with simultaneous perchlorate and nitrate treatments	2018	Frontiers in Microbiology	3	10.3389/fmicb.2018.02305	https://www.scopus.com/inward/record.uri?eid=2-s2.0-85055214086&doi=10.3389%2ffmicb.2018.02305&partnerID=40&md5=2308e18ccd3a1bdfd8501498b71b9360	Oil production; Perchlorate; Perchlorate reducing bacteria; Souring; Sulfidogenesis	English	Article	Final	All Open Access, Gold, Green	Scopus	2-s2.0-85055214086
Aleshkin A.P., Arkhipova I.G., Myslivtsev T.O., Nikiforov S.V., Polienko V.N., Semenov A.A.	57212865985;57205399223;55632241100;57190492155;56395398300;57190492860;	Features of Network Navigation Systems Construction for Surface Consumers Using Offshore Reference Points	2018	Gyroscopy and Navigation		10.1134/S2075108718040144	https://www.scopus.com/inward/record.uri?eid=2-s2.0-85059902467&doi=10.1134%2fS2075108718040144&partnerID=40&md5=b8cc19623411990c733dfa27848efde6	consumer; medium waves; navigation reference points; position measurement; positioning; radio navigation systems	English	Article	Final		Scopus	2-s2.0-85059902467
Zhang X., Tu B., Dai L.-R., Lawson P.A., Zheng Z.-Z., Liu L.-Y., Deng Y., Zhang H., Cheng L.	57203327206;57220475457;48761048200;7103001310;56610478100;40361412800;55261845800;56909425200;57118601200;	Petroclostridium xylanilyticum gen. Nov., sp. nov., a xylan-degrading bacterium isolated from an oilfield, and reclassification of clostridial cluster iii members into four novel genera in a new hungateiclostridiaceae fam. nov.	2018	International Journal of Systematic and Evolutionary Microbiology	55	10.1099/ijsem.0.002966	https://www.scopus.com/inward/record.uri?eid=2-s2.0-85054364333&doi=10.1099%2fijsem.0.002966&partnerID=40&md5=637d20f1685b7efbccd98474c59486b8	Clostridial cluster iii; Clostridium; Hungateiclostridiaceae; Petroclostridium xylanilyticum; Phylogenomic analysis	English	Article	Final	All Open Access, Bronze	Scopus	2-s2.0-85054364333
Miller D.P., Wang Q., Weinberg A., Lamont R.J.	55494848200;56162112700;14039865100;7102454379;	Transcriptome analysis of Porphyromonas gingivalis and Acinetobacter baumannii in polymicrobial communities	2018	Molecular Oral Microbiology	15	10.1111/omi.12238	https://www.scopus.com/inward/record.uri?eid=2-s2.0-85052452205&doi=10.1111%2fomi.12238&partnerID=40&md5=4263b9032f46fa386c12868991d67734	Acinetobacter baumannii; heterotypic communities; Porphyromonas gingivalis; RNA-seq	English	Article	Final	All Open Access, Green	Scopus	2-s2.0-85052452205
Altinoz M.A., Bilir A., Elmaci İ.	6602275861;6701583897;6701909831;	Erucic acid, a component of Lorenzo's oil and PPAR-δ ligand modifies C6 glioma growth and toxicity of doxorubicin. Experimental data and a comprehensive literature analysis	2018	Chemico-Biological Interactions	11	10.1016/j.cbi.2018.08.024	https://www.scopus.com/inward/record.uri?eid=2-s2.0-85052313362&doi=10.1016%2fj.cbi.2018.08.024&partnerID=40&md5=4c388f282e56c8c78cf18a1499208d1d	Cardiotoxicity; Doxorubicin; Erucic acid; Glioma; Lorenzo's oil; PPAR-Delta	English	Article	Final		Scopus	2-s2.0-85052313362
Banuti D.T., Ma P.C., Hickey J.-P., Ihme M.	23026525400;55849247700;36137016600;8264647300;	Thermodynamic structure of supercritical LOX–GH2 diffusion flames	2018	Combustion and Flame	20	10.1016/j.combustflame.2018.06.016	https://www.scopus.com/inward/record.uri?eid=2-s2.0-85049759531&doi=10.1016%2fj.combustflame.2018.06.016&partnerID=40&md5=6f22ad792f0aa162313cd04c0c153d16	Counterflow diffusion flame; Flamelet; Injection; Rocket; Supercritical; Transcritical	English	Article	Final		Scopus	2-s2.0-85049759531
Rostami A., Kamari A., Panacharoensawad E., Hashemi A.	57188924492;56532174100;23493463600;8518707600;	New empirical correlations for determination of Minimum Miscibility Pressure (MMP) during N2-contaminated lean gas flooding	2018	Journal of the Taiwan Institute of Chemical Engineers	22	10.1016/j.jtice.2018.05.048	https://www.scopus.com/inward/record.uri?eid=2-s2.0-85049352780&doi=10.1016%2fj.jtice.2018.05.048&partnerID=40&md5=79b40fe5b4ab36e4b608f10ef5b34d81	Comprehensive error analysis; Gene Expression Programming (GEP); Group Method of Data Handling (GMDH); Minimum Miscibility Pressure (MMP); N2 injection; Sensitivity analysis	English	Article	Final		Scopus	2-s2.0-85049352780
Mohammed M.H., Abdulfatah A.Y.	57204435998;55905996800;	Biochemical Enhancement of Geotechnical Properties of Marginal Soils	2018	MATEC Web of Conferences		10.1051/matecconf/201820303010	https://www.scopus.com/inward/record.uri?eid=2-s2.0-85055539113&doi=10.1051%2fmatecconf%2f201820303010&partnerID=40&md5=89a686aa5333c501bd21a9f81edf6ce5		English	Conference Paper	Final	All Open Access, Gold, Green	Scopus	2-s2.0-85055539113
Zhang Q., Ogren R.M., Kong S.-C.	56321587000;57041055200;7203044901;	Thermo-economic analysis and multi-objective optimization of a novel waste heat recovery system with a transcritical CO2 cycle for offshore gas turbine application	2018	Energy Conversion and Management	57	10.1016/j.enconman.2018.07.019	https://www.scopus.com/inward/record.uri?eid=2-s2.0-85049728176&doi=10.1016%2fj.enconman.2018.07.019&partnerID=40&md5=bbbbdd12b60c9db0390abe9adb2f8ef7	Carbon dioxide cycle; Combined cycle; Gas turbine; Multi-objective optimization; Waste heat recovery	English	Article	Final		Scopus	2-s2.0-85049728176
Li Q., Chen G., Chen H., Zhang W., Ding Y., Yu P., Zhao T., Mao G., Feng W., Yang L., Wu X.	56460509600;7407501362;57190072948;57218451162;56799440800;56804197000;36669845900;45761351000;55261872300;55732912300;7407063569;	Se-enriched G. frondosa polysaccharide protects against immunosuppression in cyclophosphamide-induced mice via MAPKs signal transduction pathway	2018	Carbohydrate Polymers	58	10.1016/j.carbpol.2018.05.046	https://www.scopus.com/inward/record.uri?eid=2-s2.0-85047449279&doi=10.1016%2fj.carbpol.2018.05.046&partnerID=40&md5=9720dee9f198c465c9acff4cd4617f06	Antioxidant activity; Cyclophosphamide; Immunomodulatory activity; MAPKs; Se-enriched Grifola frondosa; Selenium polysaccharide	English	Article	Final		Scopus	2-s2.0-85047449279
Li Y., Chen Y., Liu M., Jing H., Zhi B., Li G., Ma T.	57109746900;57210909133;57210373644;57210375284;57204058360;55711209100;55728800200;	Stimulation of Reservoir Indigenous Microorganisms with Different Nutrients in the Oil Reservoir near Injection Wells [不同营养刺激下油藏注水井近井地带内源微生物激活规律]	2018	Diqiu Kexue - Zhongguo Dizhi Daxue Xuebao/Earth Science - Journal of China University of Geosciences	1	10.3799/dqkx.2018.561	https://www.scopus.com/inward/record.uri?eid=2-s2.0-85070521005&doi=10.3799%2fdqkx.2018.561&partnerID=40&md5=a4a947ef2fe73cc166d1f20a9e320277	Functional gene; Indigenous microorganisms; Injection wells zone; Microbial enhanced oil recovery (MEOR); Oil reservoir; Stimulation	Chinese	Article	Final		Scopus	2-s2.0-85070521005
[truncated: 1,018 more rows]
