# Supplementary material for: Metabolically Active Microbial Communities in Oilfields: A Systematic Review and Synthesis of RNA Preservation, Extraction, and Sequencing Methods
Source: MDPI journal article supplement (doi:10.3390/applmicrobiol3040079), 2023-10-06
Supplement: s1 [file s1 › Table S3. script format_input_scopus.xlsx]

## Sheet: Detail
Item	Title	Year	DOI	Document Type	Language	Cited By	Author(s)
1	Comparison of microbial community structures between oil and water phases in a low-permeability reservoir after water flooding	2023	10.1016/j.egyr.2022.12.026	Article	English	0	Bian Z., Chen Y., Zhi Z., Wei L., Wu H., Wu Y.
2	The fate of antibiotic resistance genes in the coastal lagoon with multiple functional zones	2023	10.1016/j.jes.2022.07.021	Article	English	0	Li S., Gao H., Zhang H., Wei G., Shu Q., Li R., Jin S., Na G., Shi Y.
3	Control of reservoir souring by incomplete nitrate reduction in Indian oil fields	2023	10.1016/j.biteb.2022.101302	Article	English	0	Prajapat G., Jain S., Lal B., Lavania M., Agrawal A.
4	Early stage biofilm formation on bio-based microplastics in a freshwater reservoir	2023	10.1016/j.scitotenv.2022.159569	Article	English	0	Nguyen N.H.A., Marlita M., El-Temsah Y.S., Hrabak P., Riha J., Sevcu A.
5	Hydroquinone derivatives attenuate biofilm formation and virulence factor production in Vibrio spp	2023	10.1016/j.ijfoodmicro.2022.109954	Article	English	0	Sathiyamoorthi E., Faleye O.S., Lee J.-H., Lee J.
6	Distribution and accumulation of metals and metalloids in planktonic food webs of the Mediterranean Sea (MERITE-HIPPOCAMPE campaign)	2023	10.1016/j.marpolbul.2022.114384	Article	English	0	Chifflet S., Briant N., Tesán-Onrubia J.A., Zaaboub N., Amri S., Radakovitch O., Bǎnaru D., Tedetti M.
7	Biodegradation of hydrocarbons from contaminated soils by microbial consortia: A laboratory microcosm study	2023	10.1016/j.ejbt.2022.10.002	Article	English	0	Lázaro-Mass S., Gómez-Cornelio S., Castillo-Vidal M., Alvarez-Villagomez C.S., Quintana P., De la Rosa-García S.
8	Environmental conditions and mechanisms restricting microbial methanogenesis in the Miquan region of the southern Junggar Basin, NW China	2023	10.1130/b36272.1	Article	English	2	Fu H., Li Y., Su X., Yan D., Yang S., Wang G., Wang X., Zhao W.
9	Evaluation of the Microbial Community and Geochemistry in Produced Waters Collected from CO2EOR in the Niagaran Pinnacle Reef	2022	10.1021/acsearthspacechem.2c00247	Article	English	0	Stemple B., Gulliver D., Tinker K., Sarkar P., Miller J., Bibby K.
10	Stress-responses of microbes in oil reservoir under high tetracycline exposure and their environmental risks	2022	10.1016/j.envpol.2022.120355	Article	English	0	Yun Y., Su T., Gui Z., Tian X., Chen Y., Cao Y., Yang S., Xie J., Anwar N., Li M., Li G., Ma T.
11	Pumped heat energy storage with liquid media: Thermodynamic assessment by a transcritical Rankine-like model	2022	10.1016/j.est.2022.105966	Article	English	1	Salomone-González D., Curto-Risso P.L., Calvo Hernández A., Medina A., Roco J.M.M., Gonzalez-Ayala J.
12	Collective behavior and virulence arsenal of the fish pathogen Piscirickettsia salmonis in the biofilm realm	2022	10.3389/fcimb.2022.1067514	Article	English	0	Levipan H.A., Irgang R., Opazo L.F., Araya-León H., Avendaño-Herrera R.
13	tRNA modification enzyme MiaB connects environmental cues to activation of Pseudomonas aeruginosa type III secretion system	2022	10.1371/journal.ppat.1011027	Article	English	0	Lin Q., Huang J., Liu Z., Chen Q., Wang X., Yu G., Cheng P., Zhang L.-H., Xu Z.
14	Assessment of bioremediation potential of petroleum-contaminated soils from the shanbei oilfield of China revealed by qPCR and high throughput sequencing	2022	10.1016/j.chemosphere.2022.136446	Article	English	0	Wu M., Liu Z., Gao H., Gao J., Xu Y., Ou Y.
15	Effect of sulfate-reducing bacteria from salt scale of water flooding pipeline on corrosion behavior of X80 steel	2022	10.1016/j.engfailanal.2022.106788	Article	English	0	Zhao R., Wang B., Li D., Chen Y., Zhang Q.
16	Exposure to bile and gastric juice can impact the aerodigestive microbiome in people with cystic fibrosis	2022	10.1038/s41598-022-15375-4	Article	English	0	Al-Momani H., Perry A., Nelson A., Stewart C.J., Jones R., Krishnan A., Robertson A., Bourke S., Doe S., Cummings S., Anderson A., Forrest T., Forrest I., Griffin M., Wilcox M., Brodlie M., Pearson J., Ward C.
17	Detection by metagenomic functional analysis and improvement by experimental evolution of β-lactams resistance genes present in oil contaminated soils	2022	10.1038/s41598-022-13883-x	Article	English	0	Álvarez-Marín M.T., Zarzuela L., Camacho E.M., Santero E., Flores A.
18	The car tank lid bacteriome: a reservoir of bacteria with potential in bioremediation of fuel	2022	10.1038/s41522-022-00299-8	Article	English	1	Vidal-Verdú À., Gómez-Martínez D., Latorre-Pérez A., Peretó J., Porcar M.
19	Matricaria chamomilla: A valuable insight into recent advances in medicinal uses and pharmacological activities	2022	10.1007/s11101-022-09817-0	Review	English	2	El Joumaa M.M., Borjac J.M.
20	Revisiting the role of cyanobacteria-derived metabolites as antimicrobial agent: A 21st century perspective	2022	10.3389/fmicb.2022.1034471	Review	English	0	Kar J., Ramrao D.P., Zomuansangi R., Lalbiaktluangi C., Singh S.M., Joshi N.C., Kumar A., Kaushalendra, Mehta S., Yadav M.K., Singh P.K.
21	The role and therapeutic potential of gut microbiome in severe burn	2022	10.3389/fcimb.2022.974259	Review	English	0	Huang Z., Huang Y., Chen J., Tang Z., Chen Y., Liu H., Huang M., Qing L., Li L., Wang Q., Jia B.
22	Co-culture with Acinetobacter johnsonii enhances benzalkonium chloride resistance in Salmonella enterica via triggering lipid A modifications	2022	10.1016/j.ijfoodmicro.2022.109905	Article	English	0	Wilson A., Fegan N., Turner M.S.
23	Effects of Salt Concentration on the Microbial Diversity and Quality of Red Cabbage during Natural Fermentation [盐度对紫甘蓝自然发酵过程中细菌多样性及品质的影响]	2022	10.16429/j.1009-7848.2022.11.039	Article	Chinese	0	Liu K., Xie S., Li Z., Sun B.
24	DYNAMIC RESPONSE ANALYSIS OF OFFSHORE WIND TURBINE CONSIDERING ROTOR-NACELLE ASSEMBLY (RNA) OPERATION [考虑 RNA 运行作用的近海风电结构动力响应分析]	2022	10.6052/j.issn.1000-4750.2021.06.0453	Article	Chinese	0	Bai J.-L., Li C.-H., Gong Y.-A., Wang Y.-H.
25	Shale gas load recovery modeling and analysis after hydraulic fracturing based on genetic expression programming: A case study of southern Sichuan Basin shale	2022	10.1016/j.jngse.2022.104778	Article	English	1	Ren L., Wang Z., Zhao J., Wu J., Lin R., Wu J., Fu Y., Tang D.
26	The metabolism of pyrene by a novel Altererythrobacter sp. with in-situ co-substrates: A mechanistic analysis based on pathway, genomics, and enzyme activity	2022	10.1016/j.chemosphere.2022.135784	Article	English	0	Fan K., Feng Q., Li K., Lin J., Wang W., Cao Y., Gai H., Song H., Huang T., Zhu Q., Xiao M.
27	Surfactant formulation for Green Enhanced Oil Recovery	2022	10.1016/j.egyr.2022.05.293	Article	English	1	Al-Ghamdi A., Haq B., Al-Shehri D., Muhammed N.S., Mahmoud M.
28	Is Oxygenation Related to the Decomposition of Organic Matter in Cryoconite Holes?	2022	10.1007/s10021-021-00729-2	Article	English	1	Buda J., Poniecka E.A., Rozwalak P., Ambrosini R., Bagshaw E.A., Franzetti A., Klimaszyk P., Nawrot A., Pietryka M., Richter D., Zawierucha K.
29	Bacterial and Archaeal Community Distribution in Oilfield Water Re-injection Facilities and the Influences from Microorganisms in Injected Water	2022	10.1007/s00248-021-01933-2	Article	English	1	Gao P., Li Y., Tian H., Li G., Zhao F., Xia W., Pan X., Gu J.-D., Le J., Jia C., Ma T.
30	Conjugative transfer of multi-drug resistance IncN plasmids from environmental waterborne bacteria to Escherichia coli	2022	10.3389/fmicb.2022.997849	Article	English	0	Guzman-Otazo J., Joffré E., Agramont J., Mamani N., Jutkina J., Boulund F., Hu Y.O.O., Jumilla-Lorenz D., Farewell A., Larsson D.G.J., Flach C.-F., Iñiguez V., Sjöling A.
31	Viral spillover risk increases with climate change in High Arctic lake sediments	2022	10.1098/rspb.2022.1073	Article	English	0	Lemieux A., Colby G.A., Poulain A.J., Aris-Brosou S.
32	Untangling microbial diversity and assembly patterns in rare earth element mine drainage in South China	2022	10.1016/j.watres.2022.119172	Article	English	0	Chen Z., Fei Y.-H., Liu W.-S., Ding K., Lu J., Cai X., Cui T., Tang Y.-T., Wang S., Chao Y., Qiu R.
33	Bioremediation of petroleum-contaminated saline soil by Acinetobacter baumannii and Talaromyces sp. and functional potential analysis using metagenomic sequencing	2022	10.1016/j.envpol.2022.119970	Article	English	0	Liu X., He L., Zhang X., Kong D., Chen Z., Lin J., Wang C.
34	Evidencing the role of carbonic anhydrase in the formation of carbonate minerals by bacterial strains isolated from extreme environments in Qatar	2022	10.1016/j.heliyon.2022.e11151	Article	English	0	Abdelsamad R., Al Disi Z., Abu-Dieyeh M., Al-Ghouti M.A., Zouari N.
35	Dolichospermum blooms in Lake Superior: DNA-based approach provides insight to the past, present and future of blooms	2022	10.1016/j.jglr.2022.08.002	Article	English	1	Sheik C.S., Natwora K.E., Alexson E.E., Callaghan J.D., Sailer A., Schreiner K.M., Steinman B.A., Finkenbinder M.S., Filstrup C.T., Bramburger A.J.
36	Improved rRNA extraction from biofouling and bioreactor samples	2022	10.1016/j.ibiod.2022.105481	Article	English	0	Nammoura Neto G.M., Almeida R.N.A., Schneider R.P.
37	Toward evaluation and screening of the enhanced oil recovery scenarios for low permeability reservoirs using statistical and machine learning techniques	2022	10.1016/j.fuel.2022.124795	Article	English	1	Mahdaviara M., Sharifi M., Ahmadi M.
38	Sediment organic matter properties facilitate understanding nitrogen transformation potentials in East African lakes	2022	10.1016/j.scitotenv.2022.156607	Article	English	0	Yao X., Zhao Z., Wang J., Ding Q., Ren M., Kimirei I.A., Zhang L.
39	Culture-dependent and culture-independent methods reveal microbe-clay mineral interactions by dissimilatory iron-reducing bacteria in an integral oilfield	2022	10.1016/j.scitotenv.2022.156577	Article	English	2	Dong H., Zhang F., Xu T., Liu Y., Du Y., Wang C., Liu T., Gao J., He Y., Wang X., Sun S., She Y.
40	pH mediated assemblage of carbon, nitrogen, and sulfur related microbial communities in petroleum reservoirs	2022	10.3389/fmicb.2022.952285	Article	English	0	Li Y., Zhang Y., Xue S.
41	How to simply and efficiently screen microbial strains capable of anaerobic biosynthesis of biosurfactants: Method establishment, influencing factors and application example evaluation	2022	10.3389/fmicb.2022.989998	Article	English	0	Zhao F., Wang Y., Hu X., Huang X.
42	Transcriptional regulation of oil biosynthesis in seed plants: Current understanding, applications, and perspectives	2022	10.1016/j.xplc.2022.100328	Review	English	7	Yang Y., Kong Q., Lim A.R.Q., Lu S., Zhao H., Guo L., Yuan L., Ma W.
43	Antibiotic resistome and its driving factors in an urban river in northern China	2022	10.1016/j.scitotenv.2022.156536	Article	English	3	Wu Y., Qi D., Yao H., Ren J., Hu J., Lyu Y., Yang S., Sun W.
44	Rates of Sulfate Reduction by Microbial Biofilms That Form on Shale Fracture Walls within a Microfluidic Testbed	2022	10.1021/acsestengg.2c00048	Article	English	0	Zhou L., Michelson K., Fried G., Sanford R.A., Sivaguru M., Bhattacharjee A.S., Deng J., Fouke B.W., Valocchi A.J., Werth C.J.
45	Dynamic response analysis of offshore wind turbine under the coupling effects of wind, wave, current and RNA operation [风-浪-流-RNA 运行耦合作用下近海风电结构动态响应分析]	2022	10.15951/j.tmgcxb.21080804	Article	Chinese	0	Bai J., Li C., Gong Y., Wang Y., Zhu R.
46	Falsochrobactrum tianjinense sp. nov., a New Petroleum-Degrading Bacteria Isolated from Oily Soils	2022	10.3390/ijerph191811833	Article	English	1	Hu M., Zhang F., Li G., Ruan H., Li X., Zhong L., Chen G., Rui Y.
47	Effects of Wastewater Discharge on Antibiotic Resistance Genes and Microbial Community in a Coastal Area [废水排放对近海环境中抗生素抗性基因和微生物群落的影响]	2022	10.13227/j.hjkx.202112272	Article	Chinese	0	Chen J.-Y., Su Z.-G., Yao P.-C., Huang B., Zhang Y.-M., Wen D.-H.
48	Methanofollis propanolicus sp. nov., a novel archaeal isolate from a Costa Rican oil well that uses propanol for methane production	2022	10.1007/s00203-022-03152-w	Article	English	1	Dengler L., Meier J., Grünberger F., Bellack A., Rachel R., Grohmann D., Huber H.
49	Influence of Pile-Soil Interaction on Dynamic Properties and Response of Offshore Wind Turbine with Monopile Foundation in Sand Site	2022	10.1016/j.apor.2022.103279	Article	English	0	Shi S., Zhai E., Xu C., Iqbal K., Sun Y., Wang S.
50	Metabolomics reveals primary response of wheat (Triticum aestivum) to irrigation with oilfield produced water	2022	10.1016/j.envres.2022.113547	Article	English	1	Sedlacko E.M., Heuberger A.L., Chaparro J.M., Cath T.Y., Higgins C.P.
51	Obligate aerobic, gram-positive, weak acid-fast, nonmotile bacilli, Tsukamurella tyrosinosolvens: Minireview of a rare opportunistic pathogen	2022	10.12998/wjcc.v10.i24.8443	Article	English	0	Usuda D., Tanaka R., Suzuki M., Shimozawa S., Takano H., Hotchi Y., Tokunaga S., Osugi I., Katou R., Ito S., Mishima K., Kondo A., Mizuno K., Takami H., Komatsu T., Oba J., Nomura T., Sugita M.
52	Rainfall leads to elevated levels of antibiotic resistance genes within seawater at an Australian beach	2022	10.1016/j.envpol.2022.119456	Article	English	0	Williams N.L.R., Siboni N., McLellan S.L., Potts J., Scanes P., Johnson C., James M., McCann V., Seymour J.R.
53	Enhancement of MBBR reactor efficiency using effective microorganism for treatment of wastewater containing diazinon by engineered Pseudomonas putida KT2440 with manganese peroxidase 2 gene	2022	10.1016/j.jenvman.2022.115293	Article	English	2	Amiri N.A., Amiri F.A., Faravardeh L., Eslami A., Ghasemi A., Rafiee M.
54	The Microbial Community and Functional Potential in the Midland Basin Reveal a Community Dominated by Both Thiosulfate and Sulfate-Reducing Microorganisms	2022	10.1128/spectrum.00049-22	Article	English	0	Tinker K., Lipus D., Gardiner J., Stuckman M., Gulliver D.
55	Ferruginous coated grains of microbial origin from the Lower Devonian (Pragian) of the Prague Basin (Czech Republic) – Petrological and geochemical perspective	2022	10.1016/j.sedgeo.2022.106194	Article	English	0	Vodrážková S., Kumpan T., Vodrážka R., Frýda J., Čopjaková R., Koubová M., Munnecke A., Kalvoda J., Holá M.
56	Assessing multiple fecal sources to surf zone waters of two recreational beaches by bacterial community analysis	2022	10.1016/j.watres.2022.118781	Article	English	1	Li D., Van De Werfhorst L.C., Steets B., Ervin J., Murray J.L.S., Smith J., Holden P.A.
57	Microbial communities in crude oil phase and filter-graded aqueous phase from a Daqing oilfield after polymer flooding	2022	10.1111/jam.15603	Article	English	0	Wei Y.-F., Wang L., Xia Z.-Y., Gou M., Sun Z.-Y., Lv W.-F., Tang Y.-Q.
58	Biological site suitability for exposed self-regulating cultivation of blue mussel (Mytilus edulis): A Belgian case study	2022	10.1016/j.aquaeng.2022.102264	Article	English	2	Stechele B., van der Zande D., Alvera-Azcárate A., Delbare D., Lacroix G., Nevejan N.
59	Complete mitochondrial genomes of four deep-sea echinoids: conserved mitogenome organization and new insights into the phylogeny and evolution of Echinoidea	2022	10.7717/peerj.13730	Article	English	0	Sun S., Xiao N., Sha Z.
60	Complete Genome Sequences of One Salt-Tolerant and Petroleum Hydrocarbon-Emulsifying Terribacillus saccharophilus Strain ZY-1	2022	10.3389/fmicb.2022.932269	Article	English	0	Su Z., Yang S., Li M., Chen Y., Wang S., Yun Y., Li G., Ma T.
61	Bathiapeptides: Polythiazole-Containing Peptides from a Marine Biofilm-Derived Bacillus sp.	2022	10.1021/acs.jnatprod.2c00290	Article	English	0	Wu C., Tang J., Limlingan Malit J.J., Wang R., Sung H.H.-Y., Williams I.D., Qian P.-Y.
62	Synergistic Role of Plant Extracts and Essential Oils against Multidrug Resistance and Gram-Negative Bacterial Strains Producing Extended-Spectrum β-Lactamases	2022	10.3390/antibiotics11070855	Review	English	1	Alam M., Bano N., Ahmad T., Sharangi A.B., Upadhyay T.K., Alraey Y., Alabdallah N.M., Rauf M.A., Saeed M.
63	Essential oil of Foeniculum vulgare subsp. piperitum fruits exerts an anti‑tumor effect in triple‑negative breast cancer cells	2022	10.3892/mmr.2022.12759	Article	English	4	Lauricella M., Maggio A., Badalamenti N., Bruno M., D'Angelo G.D., D'Anneo A.
64	Discovery of the non-cosmopolitan lineages in Candidatus Thermoprofundales	2022	10.1111/1462-2920.15965	Article	English	1	Liu Y.-F., Yang L., Liu Z.-L., Chen J., Fang B., Zhou L., Liu J.-F., Yang S.-Z., Gu J.-D., Mu B.-Z.
65	Changes of breath volatile organic compounds in healthy volunteers following segmental and inhalation endotoxin challenge	2022	10.1088/1752-7163/ac6359	Article	English	0	Holz O., van Vorstenbosch R., Guenther F., Schuchardt S., Trinkmann F., van Schooten F.-J., Smolinska A., Hohlfeld J.M.
66	Bio-augmentation with dissimilatory nitrate reduction to ammonium (DNRA) driven sulfide-oxidizing bacteria enhances the durability of nitrate-mediated souring control	2022	10.1016/j.watres.2022.118556	Article	English	3	Qi P., Sun D., Zhang G., Li D., Wu T., Li Y.
67	Stimulation of Bathyarchaeota in enrichment cultures by syringaldehyde, 4-hydroxybenzaldehyde and vanillin under anaerobic conditions	2022	10.1016/j.ibiod.2022.105409	Article	English	0	Lin D.-D., Liu Y.-F., Zhou L., Yang S.-Z., Gu J.-D., Mu B.-Z.
68	Antimicrobial Resistance in New Zealand—A One Health Perspective	2022	10.3390/antibiotics11060778	Review	English	0	Pattis I., Weaver L., Burgess S., Ussher J.E., Dyet K.
69	Prevalence and Virulence Characteristics of Enterococcus faecalis and Enterococcus faecium in Bovine Mastitis Milk Compared to Bovine Normal Raw Milk in South Korea	2022	10.3390/ani12111407	Article	English	3	Kim H.-J., Youn H.-Y., Kang H.-J., Moon J.-S., Jang Y.-S., Song K.-Y., Seo K.-H.
70	Structural analysis of microbiomes from salt caverns used for underground gas storage	2022	10.1016/j.ijhydene.2022.04.170	Article	English	1	Schwab L., Popp D., Nowack G., Bombach P., Vogt C., Richnow H.H.
71	Bacterial pigments: A colorful palette reservoir for biotechnological applications	2022	10.1002/bab.2170	Review	English	3	Orlandi V.T., Martegani E., Giaroni C., Baj A., Bolognese F.
72	Integrated metagenomic and metatranscriptomic analysis reveals actively expressed antibiotic resistomes in the plastisphere	2022	10.1016/j.jhazmat.2022.128418	Article	English	6	Wu X., Liu Z., Li M., Bartlam M., Wang Y.
73	Deep mining decreases the microbial taxonomic and functional diversity of subsurface oil reservoirs	2022	10.1016/j.scitotenv.2022.153564	Article	English	3	Yun Y., Gui Z., Su T., Tian X., Wang S., Chen Y., Su Z., Fan H., Xie J., Li G., Xia W., Ma T.
74	The Regulatory Protein ChuP Connects Heme and Siderophore-Mediated Iron Acquisition Systems Required for Chromobacterium violaceum Virulence	2022	10.3389/fcimb.2022.873536	Article	English	0	de Lima V.M., Batista B.B., da Silva Neto J.F.
75	Polyphasic Analysis Reveals Potential Petroleum Hydrocarbon Degradation and Biosurfactant Production by Rare Biosphere Thermophilic Bacteria From Deception Island, an Active Antarctic Volcano	2022	10.3389/fmicb.2022.885557	Article	English	2	Schultz J., Argentino I.C.V., Kallies R., Nunes da Rocha U., Rosado A.S.
76	Genetic Diversity, Biofilm Formation, and Antibiotic Resistance of Pseudomonas aeruginosa Isolated from Cow, Camel, and Mare with Clinical Endometritis	2022	10.3390/vetsci9050239	Article	English	0	Mahmoud S.F., Fayez M., Swelum A.A., Alswat A.S., Alkafafy M., Alzahrani O.M., Alsunaini S.J., Almuslem A., Amer A.S.A., Yusuf S.
77	Riverine Inputs Impact the Diversity and Population Structure of Heterotrophic Fungus-like Protists and Bacterioplankton in the Coastal Waters of the South China Sea	2022	10.3390/w14101580	Article	English	0	Wang S., Sen K., He Y., Bai M., Wang G.
78	Genomic Analysis of Endophytic Bacillus-Related Strains Isolated from the Medicinal Plant Origanum vulgare L. Revealed the Presence of Metabolic Pathways Involved in the Biosynthesis of Bioactive Compounds	2022	10.3390/microorganisms10050919	Article	English	2	Semenzato G., Alonso-Vásquez T., Duca S.D., Vassallo A., Riccardi C., Zaccaroni M., Mucci N., Padula A., Emiliani G., Piccionello A.P., Puglia A.M., Fani R.
79	Degradation of long-chain n-alkanes by a novel thermal-tolerant Rhodococcus strain	2022	10.1007/s00203-022-02872-3	Article	English	2	Xiang W., Liang Y., Hong S., Wang G., You J., Xue Y., Ma Y.
80	Overview of Diverse Methyl/Alkyl-Coenzyme M Reductases and Considerations for Their Potential Heterologous Expression	2022	10.3389/fmicb.2022.867342	Review	English	3	Gendron A., Allen K.D.
81	Recent Advances on Lacto- N-neotetraose, a Commercially Added Human Milk Oligosaccharide in Infant Formula	2022	10.1021/acs.jafc.2c01101	Review	English	2	Zhang P., Zhu Y., Li Z., Zhang W., Mu W.
82	Microbial community structure and metabolic potential in the coastal sediments around the Yellow River Estuary	2022	10.1016/j.scitotenv.2021.151582	Article	English	2	Yin X., Wang W., Wang A., He M., Lin C., Ouyang W., Liu X.
83	Occurrence and distribution of cyclic-alkane-consuming psychrophilic bacteria in the Yellow Sea and East China Sea	2022	10.1016/j.jhazmat.2021.128129	Article	English	0	Cui Z., Luan X., Li S., Li Y., Bian X., Li G., Wei Q., Ran X., Bao M., Valentine D.L.
84	Bovine Respiratory Disease: Conventional to Culture-Independent Approaches to Studying Antimicrobial Resistance in North America	2022	10.3390/antibiotics11040487	Review	English	2	Andrés-Lasheras S., Jelinski M., Zaheer R., McAllister T.A.
85	Adipose tissue aging: mechanisms and therapeutic implications	2022	10.1038/s41419-022-04752-6	Review	English	7	Ou M.-Y., Zhang H., Tan P.-C., Zhou S.-B., Li Q.-F.
86	Deferrivibrio essentukiensis sp. nov., gen. nov., a Representative of Deferrivibrionaceae fam. nov., Isolated from the Subsurface Aquifer of Caucasian Mineral Drinking Waters	2022	10.1134/s0026261722020114	Article	English	2	Zavarzina D.G., Prokofeva M.I., Pikhtereva V.A., Klyukina A.A., Maslov A.A., Merkel A.Y., Gavrilov S.N.
87	Listeria monocytogenes isolates from Cornu aspersum snails: Whole genome-based characterization and host-pathogen interactions in a snail infection model	2022	10.1016/j.fsi.2022.03.028	Article	English	0	Kotzamanidis C., Malousi A., Dushku E., Dobly A., De Keersmaecker S.C.J., Roosens N.H., Karathodorou A., Staikou A., Zdragas A., Yiangou M.
88	Microbial source tracking and evaluation of best management practices for restoring degraded beaches of Lake Michigan	2022	10.1016/j.jglr.2022.01.009	Review	English	0	Nevers M.B., Buszka P.M., Byappanahalli M.N., Cole T., Corsi S.R., Ryan Jackson P., Kinzelman J.L., Nakatsu C.H., Phanikumar M.S.
89	Biosurfactant production and oil degradation by Bacillus siamensis and its potential applications in enhanced heavy oil recovery	2022	10.1016/j.ibiod.2022.105388	Article	English	3	Zhang J., Feng W., Xue Q.
90	Food-grade D-limonene enhanced a green biocide in the mitigation of carbon steel biocorrosion by a mixed-culture biofilm consortium	2022	10.1007/s00449-021-02685-6	Article	English	2	Unsal T., Wang D., Kijkla P., Kumseranee S., Punpruk S., Mohamed M.E., Saleh M.A., Gu T.
91	In vitro profiling of toxic effects of environmental polycyclic aromatic hydrocarbons on nuclear receptor signaling, disruption of endogenous metabolism and induction of cellular stress	2022	10.1016/j.scitotenv.2021.151967	Article	English	9	Šimečková P., Pěnčíková K., Kováč O., Slavík J., Pařenicová M., Vondráček J., Machala M.
92	Effects of osmotic and high pressure stress on expression of virulence factors among Enterococcus spp. isolated from food of animal origin	2022	10.1016/j.fm.2021.103900	Article	English	6	Zarzecka U., Zadernowska A., Chajęcka-Wierzchowska W.
93	First insights into bacterial communities in pre-salt oil reveal a far-from-sterile environment	2022	10.1016/j.fuel.2021.122860	Article	English	0	da Fonsêca M.M.B., Freitas J.F., Silva-Portela R.D.C.B., Minnicelli C.F., da Silva-Barbalho K.K., Agnez-Lima L.F.
94	Preparation and identification of carboxymethyl cellulose-degrading enzyme candidates for oilfield applications	2022	10.1016/j.jbiotec.2022.02.001	Article	English	2	Scheffer G., Rachel N.M., Ng K.K.S., Sen A., Gieg L.M.
95	Metagenomic Sequencing and Reverse Transcriptase PCR Reveal That Mobile Phones and Environmental Surfaces Are Reservoirs of Multidrug-Resistant Superbugs and SARS-CoV-2	2022	10.3389/fcimb.2022.806077	Article	English	3	Boucherabine S., Nassar R., Zaher S., Mohamed L., Olsen M., Alqutami F., Hachim M., Alkhaja A., Campos M., Jones P., McKirdy S., Alghafri R., Tajouri L., Senok A.
96	Physical simulation of in-situ microbial methanation in coal reservoirs with the participation of supercritical CO2 [超临界 CO2 参与下煤储层原位微生物甲烷化物理模拟研究]	2022	10.12363/issn.1001-1986.21.11.0684	Article	Chinese	0	Su X., Wang L., Zhao W., Xia D., Zhou Y., Wang Q.
97	Bioactive Compounds Characterization and Antimicrobial Potentials of Crude Extract of Curvularia lunata, a Fungal Endophyte from Elaeis guineensis.	2022	10.26538/tjnpr/v6i3.16	Article	English	4	Nwobodo D.C., Eze P.M., Okezie U.M., Okafoanyali J.O., Okoye F.B.C., Esimone C.O.
98	Antimicrobial Resistance, Biofilm Formation, and Virulence Genes in Enterococcus Species from Small Backyard Chicken Flocks	2022	10.3390/antibiotics11030380	Article	English	3	Alzahrani O.M., Fayez M., Alswat A.S., Alkafafy M., Mahmoud S.F., Al-Marri T., Almuslem A., Ashfaq H., Yusuf S.
99	Biofilm on Toothbrushes of Children with Cystic Fibrosis: A Potential Source of Lung Re-Infection after Antibiotic Treatment?	2022	10.3390/ma15062139	Article	English	0	Hu H., Clothier N., Jacombs A., McKay K., Deva A.K., Vickery K.
100	Occurrence of Antibiotic Resistance in the Mediterranean Sea	2022	10.3390/antibiotics11030332	Article	English	0	Gambino D., Savoca D., Sucato A., Gargano V., Gentile A., Pantano L., Vicari D., Alduina R.
101	Phase separation by the SARS-CoV-2 nucleocapsid protein: Consensus and open questions	2022	10.1016/j.jbc.2022.101677	Review	English	6	Cascarina S.M., Ross E.D.
102	Sources of microbial contamination in the watershed and coastal zone of Soufriere, St. Lucia	2022	10.1007/s10661-022-09862-4	Article	English	0	Serville-Tertullien M., Charlemagne K., Eristhee N., McDermott K., Majury A., Schirmer T., Sultana T., Metcalfe C.D.
103	Offshore Marine Sediment Microbiota Respire Structurally Distinct Organohalide Pollutants	2022	10.1021/acs.est.1c06680	Article	English	8	Xu G., Zhang N., Zhao X., Chen C., Zhang C., He J.
104	Minimally invasive skin sampling and transcriptome analysis using microneedles for skin type biomarker research	2022	10.1111/srt.13135	Article	English	1	Kim S.H., Kim J.H., Lee S.J., Jung M.S., Jeong D.H., Lee K.H.
105	Turning Waste into Beneficial Resource: Implication of Ageratum conyzoides L. in Sustainable Agriculture, Environment and Biopharma Sectors	2022	10.1007/s12033-021-00409-5	Review	English	3	Paul S., Datta B.K., Ratnaparkhe M.B., Dholakia B.B.
106	Deterministic tools to estimate induction time for methane hydrate formation in the presence of Luvicap 55 W solutions	2022	10.1016/j.molliq.2021.118374	Article	English	2	Zare M., Zendehboudi S., Abdi M.A.
107	Sex and habitat drive hantavirus prevalence in marsh rice rat populations impacted by the Deepwater Horizon oil spill	2022	10.1002/ecs2.3929	Article	English	0	Pérez-Umphrey A.A., Jonsson C.B., Bonisoli-Alquati A., Snider A.M., Stouffer P.C., Taylor S.S.
108	A Review of Advanced Molecular Engineering Approaches to Enhance the Thermostability of Enzyme Breakers: From Prospective of Upstream Oil and Gas Industry	2022	10.3390/ijms23031597	Review	English	1	Naeem M., Khalil A.B., Tariq Z., Mahmoud M.
109	Cellular Response of Human Osteoblasts to Different Presentations of Deproteinized Bovine Bone	2022	10.3390/ma15030999	Article	English	1	Carvalho P.H.A., Al-Maawi S., Dohle E., Sader R.A., Pereira-Filho V.A., Ghanaati S.
110	Bacterial community profile of the crude oil-contaminated saline soil in the Yellow River Delta Natural Reserve, China	2022	10.1016/j.chemosphere.2021.133207	Article	English	7	Gao Y., Yuan L., Du J., Wang H., Yang X., Duan L., Zheng L., Bahar M.M., Zhao Q., Zhang W., Liu Y., Fu Z., Wang W., Naidu R.
111	Preliminary insights about the treatment of contaminated marine sediments by means of bioslurry reactor: Process evaluation and microbiological characterization	2022	10.1016/j.scitotenv.2021.150708	Article	English	4	Avona A., Capodici M., Di Trapani D., Giustra M.G., Greco Lucchina P., Lumia L., Di Bella G., Viviani G.
112	Non-syntrophic methanogenic hydrocarbon degradation by an archaeal species	2022	10.1038/s41586-021-04235-2	Article	English	24	Zhou Z., Zhang C.-J., Liu P.-F., Fu L., Laso-Pérez R., Yang L., Bai L.-P., Li J., Yang M., Lin J.-Z., Wang W.-D., Wegener G., Li M., Cheng L.
113	Metabolomics as a Critical Tool for Studying Clinical Surgery	2022	10.1080/10408347.2022.2162810	Review	English	0	Gao Z., Zhou W., Lv X., Wang X.
114	How do microbial communities deal with chronic hydrocarbon presence in oil seep soils? Data from historical hand-dug oil wells	2022	10.1002/ldr.4531	Article	English	0	Brzeszcz J., Skalski T., Jankowski L., Kapusta P.
115	Detection and Monitoring of Corrosive Oilfield Microorganisms via Novel Biomarker Technologies	2022	10.2118/211238-ms	Conference Paper	English	0	Lahme S., Mand J., Oparaodu K., Enning D.
116	A SEMI-ANALYTICAL METHODOLOGY TO ASSESS THE DYNAMIC ELASTIC RESPONSE OF A MONOPILE OFFSHORE WIND TURBINE SUBJECTED TO LOW-ENERGY SHIP IMPACTS	2022	10.1115/omae2022-79672	Conference Paper	English	0	Ladeira I., Le Sourne H., Moran J., Salazar P.
117	Molecular Detection of OXA-type Carbapenemases among Acinetobacter baumannii Isolated from Burn Patients and Hospital Environments	2022	10.2174/18742858-v16-e2206101	Article	English	1	Bakhshi F., Firoozeh F., Badmasti F., Dadashi M., Zibaei M., Khaledi A.
118	Effect of a bacteriocin-producing Streptococcus salivarius on the pathogen Fusobacterium nucleatum in a model of the human distal colon	2022	10.1080/19490976.2022.2100203	Article	English	0	Lawrence G.W., McCarthy N., Walsh C.J., Kunyoshi T.M., Lawton E.M., O’Connor P.M., Begley M., Cotter P.D., Guinane C.M.
119	Analysis and Research on Oil Production in Ultra High Water Cut Stage Based on Iots	2022	10.1007/978-3-031-05484-6_135	Conference Paper	English	0	Hu S.
120	Microbial-mediated CO2 methanation and renewable natural gas storage in depleted petroleum reservoirs: A review of biogeochemical mechanism and perspective	2022	10.1016/j.gr.2022.04.017	Article	English	4	Xiong Y., Hou Z., Xie H., Zhao J., Tan X., Luo J.
121	Multimodal Feature Evaluation and Fusion for Emotional Well-Being Monitorization	2022	10.1007/978-3-031-04881-4_20	Conference Paper	English	0	Zubiaga I., Justo R.
122	Experimental Study on Microbial Induced Calcium Carbonate Precipitation to Enhance Reservoir Recovery	2022	10.30498/ijb.2021.279942.3024	Article	English	2	Zhong M., Liu B., Zhang L., Wang J., Chen J., Li J., Liu Y., Ming L.
123	Multiple Novel Traits without Immediate Benefits Originate in Bacteria Evolving on Single Antibiotics	2022	10.1093/molbev/msab341	Article	English	1	Karve S., Wagner A.
124	Genomic and phenotypic analyses of diverse non-clinical Acinetobacter baumannii strains reveals strain-specific virulence and resistance capacity	2022	10.1099/mgen.0.000765	Article	English	0	Hamidian M., Maharjan R.P., Farrugia D.N., Delgado N.N., Dinh H., Short F.L., Kostoulias X., Peleg A.Y., Paulsen I.T., Cain A.K.
125	Hospital sink traps as a potential source of the emerging multidrug-resistant pathogen Cupriavidus pauculus: Characterization and draft genome sequence of strain MF1	2022	10.1099/jmm.0.001501	Article	English	0	Butler J., Kelly S.D., Muddiman K.J., Besinis A., Upton M.
126	Metabolites of the oral microbiome: Important mediators of multikingdom interactions	2022	10.1093/femsre/fuab039	Review	English	2	Barbour A., Elebyary O., Fine N., Oveisi M., Glogauer M.
127	H-NOX proteins in the virulence of pathogenic bacteria	2022	10.1042/bsr20212014	Review	English	0	Lee-Lopez C., Yukl E.
128	Microbial community diversity and potential bioremediation of drill cuttings in two oil reservoirs	2022	10.1080/10916466.2021.2024228	Article	English	0	Deng S., Wang B., Su S., Zeng H., Chen R., Ma H., Hu Y., Zheng A., Shu C., Zou J., Li Y., Zhu H., Sun S., She Y., Zhang F.
129	Genetic and comparative genome analysis of Exiguobacterium aurantiacum SW‐20, a petroleum‐degrading bacteria with salt tolerance and heavy metal‐tolerance isolated from produced water of Changqing oilfield, China	2022	10.3390/microorganisms10010066	Article	English	4	Su Z., Wang S., Yang S., Yin Y., Cao Y., Li G., Ma T.
130	Modelling density of pure and binary mixtures of normal alkanes: Comparison of hybrid soft computing techniques, gene expression programming, and equations of state	2022	10.1016/j.petrol.2021.109737	Article	English	4	Shahabi-Ghahfarokhy A., Nakhaei-Kohani R., Nait Amar M., Hemmati-Sarapardeh A.
131	Genomics and simulated laboratory studies reveal Thermococcus sp. 101C5 as a novel hyperthermophilic archaeon possessing a specialized metabolic arsenal for enhanced oil recovery	2022	10.1007/s10482-021-01667-8	Article	English	0	Kapse N.G., Paliwal V., Dagar S.S., Rana D.P., Dhakephalkar P.K.
132	Screening of Extremophiles for Microbial Enhanced Oil Recovery Based on Surface Active Properties	2022	10.1007/978-981-16-5465-7_5	Book Chapter	English	0	Datta P., Tiwari P., Pandey L.
133	On the evaluation of permeability of heterogeneous carbonate reservoirs using rigorous data-driven techniques	2022	10.1016/j.petrol.2021.109685	Article	English	5	Mahdaviara M., Larestani A., Nait Amar M., Hemmati-Sarapardeh A.
134	Bacterial community dynamics during MEOR biostimulation of an oil reservoir in sumatera Indonesia	2022	10.1016/j.petrol.2021.109558	Article	English	1	Astuti D.I., Purwasena I.A., Priharto N., Ariadji T., Afifah L.N., Saputro R.B., Aditiawati P., Persada G.P., Ananggadipa A.A., Abqory M.H., Amaniyah M., Dewi U.R.
135	Unsupervised Feature Selection Using an Integrated Strategy of Hierarchical Clustering With Singular Value Decomposition: An Integrative Biomarker Discovery Method With Application to Acute Myeloid Leukemia	2022	10.1109/tcbb.2021.3110989	Article	English	2	Bhadra T., Mallik S., Sohel A., Zhao Z.
136	Methylotrophs and Hydrocarbon-Degrading Bacteria Are Key Players in the Microbial Community of an Abandoned Century-Old Oil Exploration Well	2022	10.1007/s00248-021-01748-1	Article	English	3	Rojas-Gätjens D., Fuentes-Schweizer P., Rojas-Jiménez K., Pérez-Pantoja D., Avendaño R., Alpízar R., Coronado-Ruíz C., Chavarría M.
137	High rates of antibiotic resistance and biofilm production in Escherichia coli isolates from food products of animal and vegetable origins in Tunisia: a real threat to human health	2022	10.1080/09603123.2020.1769039	Article	English	5	Badi S., Salah Abbassi M., Snoussi M., Werheni R., Hammami S., Maal-Bared R., Hassen A.
138	The experimental research of sorption and destruction of diesel fuel by fucus algae of the Barents sea	2021	10.1088/1755-1315/937/2/022058	Conference Paper	English	0	Voskoboinikov G., Pugovkin D., Metelkova L.
139	Environmental Biofilms as Reservoirs for Antimicrobial Resistance	2021	10.3389/fmicb.2021.766242	Review	English	12	Flores-Vargas G., Bergsveinson J., Lawrence J.R., Korber D.R.
140	Indigenous microbial communities in heavy oil show a threshold response to salinity	2021	10.1093/femsec/fiab157	Article	English	5	Voskuhl L., Akbari A., Müller H., Pannekens M., Brusilova D., Dyksma S., Haque S., Graupner N., Dunthorn M., Meckenstock R.U., Brauer V.S.
141	The FUR-like regulators PerRA and PerRB integrate a complex regulatory network that promotes mammalian host-adaptation and virulence of Leptospira interrogans	2021	10.1371/journal.ppat.1009078	Article	English	1	Grassmann A.A., Zavala-Alvarado C., Bettin E.B., Picardeau M., Benaroudj N., Caimano M.J.
142	Investigating the role of the carbon storage regulator A (CsrA) in Leptospira spp.	2021	10.1371/journal.pone.0260981	Article	English	2	Phoka T., Fule L., da Fonseca J.P., Cokelaer T., Picardeau M., Patarakul K.
143	The impact of bacterial diversity on resistance to biocides in oilfields	2021	10.1038/s41598-021-02494-7	Article	English	2	Pereira G.F., Pilz-Junior H.L., Corção G.
144	Sulphate-reducing bacterial community structure from produced water of the Periquito and Galo de Campina onshore oilfields in Brazil	2021	10.1038/s41598-021-99196-x	Article	English	4	Tiburcio S.R.G., Macrae A., Peixoto R.S., da Costa Rachid C.T.C., Mansoldo F.R.P., Alviano D.S., Alviano C.S., Ferreira D.F., de Queiroz Venâncio F., Ferreira D.F., Vermelho A.B.
145	Control of gene expression in engineered mammalian cells with a programmable shear-stress inducer	2021	10.1002/bit.27939	Article	English	1	Strittmatter T., Argast P., Buchman P., Krawczyk K., Fussenegger M.
146	Oil contamination drives the transformation of soil microbial communities: Co-occurrence pattern, metabolic enzymes and culturable hydrocarbon-degrading bacteria	2021	10.1016/j.ecoenv.2021.112740	Article	English	14	Huang L., Ye J., Jiang K., Wang Y., Li Y.
147	Biologically Enhanced Starch Bio-Ink for Promoting 3D Cell Growth	2021	10.1002/admt.202100551	Article	English	12	Zhuang P., Greenberg Z., He M.
148	Green-synthesized nickel oxide nanoparticles enhances biohydrogen production of Klebsiella sp. WL1316 using lignocellulosic hydrolysate and its regulatory mechanism	2021	10.1016/j.fuel.2021.121585	Article	English	14	Zhang Q., Xu S., Li Y., Ding P., Zhang Y., Zhao P.
149	Hemodynamic performance of tissue-engineered vascular grafts in Fontan patients	2021	10.1038/s41536-021-00148-w	Article	English	12	Schwarz E.L., Kelly J.M., Blum K.M., Hor K.N., Yates A.R., Zbinden J.C., Verma A., Lindsey S.E., Ramachandra A.B., Szafron J.M., Humphrey J.D., Shin’oka T., Marsden A.L., Breuer C.K.
150	Comprehensive and comparative studies on nanocytotoxicity of glyceryl monooleate- and phytantriol-based lipid liquid crystalline nanoparticles	2021	10.1186/s12951-021-00913-5	Article	English	3	Jagielski J., Przysiecka Ł., Flak D., Diak M., Pietralik-Molińska Z., Kozak M., Jurga S., Nowaczyk G.
151	Anaerobic biosynthesis of rhamnolipids by Pseudomonas aeruginosa: performance, mechanism and its application potential for enhanced oil recovery	2021	10.1186/s12934-021-01593-4	Article	English	6	Zhao F., Wang Q., Zhang Y., Lei L.
152	Population structure and uropathogenic potential of extended-spectrum cephalosporin-resistant Escherichia coli from retail chicken meat	2021	10.1186/s12866-021-02160-y	Article	English	3	Buberg M.L., Mo S.S., Sekse C., Sunde M., Wasteson Y., Witsø I.L.
153	Juxtapose: a gene-embedding approach for comparing co-expression networks	2021	10.1186/s12859-021-04055-1	Article	English	4	Ovens K., Maleki F., Eames B.F., McQuillan I.
154	Biofilm-isolated Listeria monocytogenes exhibits reduced systemic dissemination at the early (12–24 h) stage of infection in a mouse model	2021	10.1038/s41522-021-00189-5	Article	English	10	Bai X., Liu D., Xu L., Tenguria S., Drolia R., Gallina N.L.F., Cox A.D., Koo O.-K., Bhunia A.K.
155	Molecular detection of Leishmania donovani, Leishmania major, and Trypanosoma species in Sergentomyia squamipleuris sand flies from a visceral leishmaniasis focus in Merti sub-County, eastern Kenya	2021	10.1186/s13071-020-04517-0	Article	English	1	Owino B.O., Mwangi J.M., Kiplagat S., Mwangi H.N., Ingonga J.M., Chebet A., Ngumbi P.M., Villinger J., Masiga D.K., Matoke-Muhia D.
156	New evidence for a hydroxylation pathway for anaerobic alkane degradation supported by analyses of functional genes and signature metabolites in oil reservoirs	2021	10.1186/s13568-020-01174-5	Article	English	3	Shou L.-B., Liu Y.-F., Zhou J., Liu Z.-L., Zhou L., Liu J.-F., Yang S.-Z., Gu J.-D., Mu B.-Z.
157	Spatial separation of microbial communities reflects gradients of salinity and temperature in offshore sediments from Shenzhen, south China	2021	10.1016/j.ocecoaman.2021.105904	Article	English	0	Zhang R., Sun M., Zhang H., Zhao Z.
158	Characteristics and Genesis of Organic Matter within the Lower Member of Yaojia Formation and its Implications for Tabular-type Uranium Deposits in the Southwest of Songliao Basin	2021	10.1134/s1075701521310019	Article	English	0	Huang Shaohua, Mingkuan Q., Zhangyue L., Fuli D., Xiao H., Qiang G., Licheng J.
159	Detection of sulfate-reducing bacteria as an indicator for successful mitigation of sulfide production	2021	10.1128/aem.01748-21	Article	English	2	Dutta A., Valle F., Goldman T., Keating J., Burke E., Williamson N., Dirmeier R., Bowman J.S.
160	Metagenomic Analysis of Biocide-Treated Neotropical Oil Reservoir Water Unveils Microdiversity of Thermophile Tepidiphilus	2021	10.3389/fmicb.2021.741555	Article	English	1	Bedoya K., Niño J., Acero J., Jaimes-Prada R., Cabarcas F., Alzate J.F.
161	Transcriptome and proteome analysis of Bacillus subtilis NCD-2 response to l-proline from cotton root exudates [枯草芽孢杆菌 NCD-2 对棉花根系分泌物 L-脯氨酸响应的转录-蛋白质组学联合分析]	2021	10.3864/j.issn.0578-1752.2021.21.009	Article	Chinese	0	Zhao W., Guo Q., Dong L., Wang P., Su Z., Zhang X., Lu X., Li S., Ma P.
162	Multidrug resistance, biofilm formation, and virulence genes of Escherichia coli from backyard poultry farms	2021	10.14202/vetworld.2021.2869-2877	Article	English	2	Al-Marri T., Al-Marri A., Al-Zanbaqi R., Ajmi A.A., Fayez M.
163	Application of gene expression programming (Gep) in modeling hydrocarbon recovery in wag injection process	2021	10.3390/en14217131	Article	English	3	Afzali S., Mohamadi-Baghmolaei M., Zendehboudi S.
164	Metagenomic investigation of a low diversity, high salinity offshore oil reservoir	2021	10.3390/microorganisms9112266	Article	English	3	Scheffer G., Hubert C.R.J., Enning D.R., Lahme S., Mand J., de Rezende J.R.
165	Bacterial community structure of aged oil sludge contaminated soil revealed by illumina high-throughput sequencing in East China	2021	10.1007/s11274-021-03059-6	Article	English	1	Wang H., Kuang S., Lang Q., Wang L.
166	Vertical distribution of biofilm communities along an injection wellbore in a deep petroleum reservoir	2021	10.1016/j.petrol.2021.109024	Article	English	1	Song Z., Zhu P., Wu X., Xu P., Li H., Du C., He X., Yang L., Zhu W.
167	Marine signature taxa and core microbial community stability along latitudinal and vertical gradients in sediments of the deepest freshwater lake	2021	10.1038/s41396-021-01011-y	Article	English	3	Reboul G., Moreira D., Annenkova N.V., Bertolino P., Vershinin K.E., López-García P.
168	Bacterial and archaeal diversity in oil fields and reservoirs and their potential role in hydrocarbon recovery and bioprospecting	2021	10.1007/s11356-020-11705-z	Review	English	6	Singh N.K., Choudhary S.
169	Gene Sets and Mechanisms of Sulfate-Reducing Bacteria Biofilm Formation and Quorum Sensing With Impact on Corrosion	2021	10.3389/fmicb.2021.754140	Review	English	11	Tripathi A.K., Thakur P., Saxena P., Rauniyar S., Gopalakrishnan V., Singh R.N., Gadhamshetty V., Gnimpieba E.Z., Jasthi B.K., Sani R.K.
170	Transcriptomic Analysis Reveals That Municipal Wastewater Effluent Enhances Vibrio vulnificus Growth and Virulence Potential	2021	10.3389/fmicb.2021.754683	Article	English	0	Correa Velez K.E., Norman R.S.
171	Editorial: The Role of Environmental Reservoirs in Campylobacter-Mediated Infection	2021	10.3389/fcimb.2021.773436	Editorial	English	1	Enany S., Piccirillo A., Elhadidy M., Tryjanowski P.
172	Suspended solids-associated toxicity of hydraulic fracturing flowback and produced water on early life stages of zebrafish (Danio rerio)	2021	10.1016/j.envpol.2021.117614	Article	English	4	Lu Y., Zhang Y., Zhong C., Martin J.W., Alessi D.S., Goss G.G., Ren Y., He Y.
173	Stochastic assembly process dominates bacterial succession during a long-term microbial enhanced oil recovery	2021	10.1016/j.scitotenv.2021.148203	Article	English	7	Yun Y., Gui Z., Xie J., Chen Y., Tian X., Li G., Gu J.-D., Ma T.
174	Microbial lipopeptide-producing strains and their metabolic roles under anaerobic conditions	2021	10.3390/microorganisms9102030	Review	English	5	Li J.-Y., Wang L., Liu Y.-F., Zhou L., Gang H.-Z., Liu J.-F., Yang S.-Z., Mu B.-Z.
175	Smart learning strategy for predicting viscoelastic surfactant (VES) viscosity in oil well matrix acidizing process using a rigorous mathematical approach	2021	10.1007/s42452-021-04799-8	Article	English	4	Mahdaviara M., Rostami A., Shahbazi K.
176	A Targeted Nanosystem for Detection of Inflammatory Diseases via Fluorescent/Optoacoustic Imaging and Therapy via Modulating Nrf2/NF-κB Pathways	2021	10.1002/smll.202102598	Article	English	10	Ouyang J., Sun L., Pan J., Zeng Z., Zeng C., Zeng F., Tian M., Wu S.
177	Removal efficacy of opportunistic pathogen gene markers in drinking water supply systems: an in situ and large-scale molecular investigation	2021	10.1007/s11356-021-15744-y	Article	English	0	Han Z., Lu J., An W., Zhang Y., Yang M.
178	Identification and characterization of chlorine-resistant bacteria from water distribution sites of Mumbai	2021	10.1007/s00203-021-02503-3	Article	English	1	Jathar S., Shinde D., Dakhni S., Fernandes A., Jha P., Desai N., Jobby R.
179	Coupled modelling of the interaction between dissolved substances emitted by Minho and Lima estuarine outflows (Portugal)	2021	10.1016/j.jmarsys.2021.103601	Article	English	2	Oliveira V.H., Sousa M.C., Picado A., Mendes R., Ribeiro A.S., Morgado F., Dias J.M.
180	The aggravation of allergic airway inflammation with dibutyl phthalate involved in Nrf2-mediated activation of the mast cells	2021	10.1016/j.scitotenv.2021.148029	Article	English	8	Wang X., Lv Z., Han B., Li S., Yang Q., Wu P., Li J., Han B., Deng N., Zhang Z.
181	Benthic microbial diversity trends in response to heavy metals in an oxygen-deficient eutrophic bay of the Humboldt current system offshore the Atacama Desert	2021	10.1016/j.envpol.2021.117281	Article	English	6	Zárate A., Dorador C., Valdés J., Molina V., Icaza G., Pacheco A.S., Castillo A.
182	Activity and structure of methanogenic microbial communities in sediments of cascade hydropower reservoirs, Southwest China	2021	10.1016/j.scitotenv.2021.147515	Article	English	3	Wu D., Zhao Y., Cheng L., Zhou Z., Wu Q., Wang Q., Yuan Q.
183	Extensive Horizontal Gene Transfer within and between Species of Coagulase-Negative Staphylococcus	2021	10.1093/gbe/evab206	Article	English	5	Smith J.T., Andam C.P.
184	Phylogenetic Diversity and Potential Activity of Bacteria and Fungi in the Deep Subsurface Horizons of an Uranium Deposit	2021	10.1134/s0026261721040032	Article	English	2	Babich T.L., Semenova E.M., Sokolova D.S., Tourova T.P., Bidzhieva S.K., Loiko N.G., Avdonin G.I., Lutsenko N.I., Nazina T.N.
185	Genome-resolved meta-analysis of the microbiome in oil reservoirs worldwide	2021	10.3390/microorganisms9091812	Article	English	1	Hidalgo K.J., Sierra-Garcia I.N., Zafra G., de Oliveira V.M.
186	Integrating experiments with system-level biogeochemical modeling to understand nitrogen cycling of reservoir sediments at elevated hydrostatic pressure	2021	10.1016/j.envres.2021.111671	Article	English	3	Wu H., Bertilsson S., Zhang W., Li Y., Hui C., Wang H., Li J., Niu L.
187	A review of offshore wind monopiles structural design achievements and challenges	2021	10.1016/j.oceaneng.2021.109409	Article	English	15	Sunday K., Brennan F.
188	Assessing the in situ bacterial diversity and composition at anthropogenically active sites using the environmental DNA (eDNA)	2021	10.1016/j.marpolbul.2021.112593	Article	English	3	Garlapati D., Kumar B.C., Muthukumar C., Madeswaran P., Ramu K., Murthy M.V.R.
189	The effect of the TMD on the vibration of an offshore wind turbine considering three soil-pile-interaction models	2021	10.1177/13694332211008316	Article	English	1	Robinson M.T.A., Wang Z.
190	Spatial dynamics of bacterial community in chlorinated drinking water distribution systems supplied with two treatment plants: An integral study of free-living and particle-associated bacteria	2021	10.1016/j.envint.2021.106552	Article	English	5	Bian K., Wang C., Jia S., Shi P., Zhang H., Ye L., Zhou Q., Li A.
191	Reaction kinetics model and numerical simulation method of microbial flooding in oil reservoirs [油藏微生物驱反应动力学模型及数值模拟方法]	2021	10.3969/j.issn.1673-5005.2021.04.010	Article	Chinese	0	Yao C., Meng X., Qu X., Zhan G., Li L., Lei G.
192	Interaction between in-situ oil reservoir microorganisms and minerals [油藏原位微生物与储层矿物的相互作用]	2021	10.3969/j.issn.1673-5005.2021.04.015	Article	Chinese	0	Zhao J., Li L., Wan Y., Li Z., Luo N., Mu H., Li W., Zhang Y.
193	Thermodynamically favorable reactions shape the archaeal community affecting bacterial community assembly in oil reservoirs	2021	10.1016/j.scitotenv.2021.146506	Article	English	9	Zhao J.-Y., Hu B., Dolfing J., Li Y., Tang Y.-Q., Jiang Y., Chi C.-Q., Xing J., Nie Y., Wu X.-L.
194	Vendian hydrogeochemistry of the siberian platform	2021	10.2113/rgg20194074	Article	English	0	Novikov D.А., Chernykh А.V., Konstantinova L.N., Dultsev F.F., Yurchik I.I.
195	Lipid nanocarriers for anti-HIV therapeutics: A focus on physicochemical properties and biotechnological advances	2021	10.3390/pharmaceutics13081294	Review	English	7	Faria M.J., Lopes C.M., Das Neves J., Lúcio M.
196	Exploiting microbes in the petroleum field: Analyzing the credibility of microbial enhanced oil recovery (MEOR)	2021	10.3390/en14154684	Review	English	15	Quraishi M., Bhatia S.K., Pandit S., Gupta P.K., Rangarajan V., Lahiri D., Varjani S., Mehariya S., Yang Y.-H.
197	Variation in immune-related gene expression provides evidence of local adaptation in porites astreoides (Lamarck, 1816) between inshore and offshore meta-populations inhabiting the lower florida reef tract, USA	2021	10.3390/w13152107	Article	English	1	Haslun J.A., Hauff-Salas B., Strychar K.B., Cervino J.M., Ostrom N.E.
198	Investigating the potential of bioremediation in aged oil-polluted hypersaline soils in the south oilfields of Iran	2021	10.1007/s10661-021-09304-7	Article	English	2	Kalami R., Pourbabaee A.-A.
199	Control of variability of primary grain assemblages on the stratigraphic differences in diagenetic processes and products in organic-rich sediments	2021	10.1016/j.sedgeo.2021.105966	Article	English	3	Chukwuma K., Tsikos H., Wagner N.
200	Investigating the mechanism of microbiologically influenced corrosion of carbon steel using X-ray micro-computed tomography	2021	10.1007/s10853-021-06112-9	Article	English	3	Albahri M.B., Barifcani A., Iglauer S., Lebedev M., O’Neil C., Salgar-Chaparro S.J., Machuca L.L.
201	Sulphate supergene minerals: An intuitive indicator for deep deposit in plateau regions	2021	10.1002/gj.4143	Article	English	0	Zhao Z., Zhao Z.
202	The Synthesis and Biological Evaluation of Some C-9 and C-10 Substituted Derivatives of the RNA Polymerase i Transcription Inhibitor CX-5461	2021	10.1071/ch21049	Article	English	0	Amarasiri M., Vo Y., Gardiner M.G., Poh P., Soo P., Pavy M., Hein N., Ferreira R., Hannan K.M., Hannan R.D., Banwell M.G.
203	Isoprenoid Metabolism and Engineering in Glandular Trichomes of Lamiaceae	2021	10.3389/fpls.2021.699157	Review	English	4	Mahmoud S.S., Maddock S., Adal A.M.
204	Recognizing the pathways of microbial methanogenesis through methane isotopologues in the subsurface biosphere	2021	10.1016/j.epsl.2021.116960	Article	English	3	Shuai Y., Xie H., Zhang S., Zhang Y., Eiler J.M.
205	Land-use types shape soil microbial compositions under rapid urbanization in the Xiong'an New Area, China	2021	10.1016/j.scitotenv.2021.145976	Article	English	9	Wang C., Masoudi A., Wang M., Yang J., Yu Z., Liu J.
206	Microbial Degradation Rates of Natural Bitumen	2021	10.1021/acs.est.1c00596	Article	English	2	Pannekens M., Voskuhl L., Mohammadian S., Köster D., Meier A., Köhne J.M., Kulbatzki M., Akbari A., Haque S., Meckenstock R.U.
207	Response of antibiotic and heavy metal resistance genes to tetracyclines and copper in substrate-free hydroponic microcosms with Myriophyllum aquaticum	2021	10.1016/j.jhazmat.2021.125444	Article	English	22	Guo X., Zhu L., Zhong H., Li P., Zhang C., Wei D.
208	Synthetic and natural insecticides: Gas, liquid, gel and solid formulations for stored‐product and food‐industry pest control	2021	10.3390/insects12070590	Review	English	33	Stejskal V., Vendl T., Aulicky R., Athanassiou C.
209	Integration of the metabolome and transcriptome reveals the metabolites and genes related to nutritional and medicinal value in Coriandrum sativum	2021	10.1016/s2095-3119(20)63358-5	Article	English	8	WU T., FENG S.-Y., YANG Q.-H., BHETARIYA P.J., GONG K., CUI C.-L., SONG J., PING X.-R., PEI Q.-Y., YU T., SONG X.-M.
210	Identification and molecular characterization of rice bran-specific lipases	2021	10.1007/s00299-021-02714-4	Article	English	3	Bansal S., Sardar S., Sinha K., Bhunia R.K., Katoch M., Sonah H., Deshmukh R., Ram H.
211	Dental biofilm of symptomatic COVID-19 patients harbours SARS-CoV-2	2021	10.1111/jcpe.13471	Article	English	18	Gomes S.C., Fachin S., da Fonseca J.G., Angst P.D.M., Lamers M.L., da Silva I.S.B., Nunes L.N.
212	Identification, resistance to antibiotics and biofilm formation of bacterial strains isolated from a reverse osmosis system of a drinking water treatment plant	2021	10.1016/j.scitotenv.2021.145718	Article	English	9	Labella A., Molero R., Leiva-Rebollo R., Pérez-Recuerda R., Borrego J.J.
213	Back to basics: Choosing the appropriate surface disinfectant	2021	10.3390/antibiotics10060613	Review	English	4	Artasensi A., Mazzotta S., Fumagalli L.
214	In vitro assessment of antitumor immune responses using tumor antigen proteins produced by transgenic silkworms	2021	10.1007/s10856-021-06526-6	Article	English	2	Yamada K., Masuda K., Ida S., Tada H., Bando M., Abe K., Tatematsu K.-I., Sezutsu H., Oyama T., Chikamatsu K., Takeda S.
215	Prokaryotic community diversity during bioremediation of crude oil contaminated oilfield soil: effects of hydrocarbon concentration and salinity	2021	10.1007/s42770-021-00476-5	Article	English	3	Camacho-Montealegre C.M., Rodrigues E.M., Morais D.K., Tótola M.R.
216	Synergistic approach to control reservoir souring in the moderately thermophilic oil fields of western India	2021	10.1016/j.biteb.2021.100649	Article	English	4	Prajapat G., Jain S., Rellegadla S., Tailor P., Agrawal A.
217	Petroleum contamination significantly changes soil microbial communities in three oilfield locations in Delta State, Nigeria	2021	10.1007/s11356-021-12955-1	Article	English	10	Mafiana M.O., Kang X.-H., Leng Y., He L.-F., Li S.-W.
218	Recent progress and advanced technology in carbohydrate-based drug development	2021	10.1016/j.copbio.2020.12.023	Review	English	15	Pan L., Cai C., Liu C., Liu D., Li G., Linhardt R.J., Yu G.
219	Cross-Hemisphere Study Reveals Geographically Ubiquitous, Plastic-Specific Bacteria Emerging from the Rare and Unexplored Biosphere	2021	10.1128/msphere.00851-20	Article	English	10	Scales B.S., Cable R.N., Duhaime M.B., Gerdts G., Fischer F., Fischer D., Mothes S., Hintzki L., Moldaenke L., Ruwe M., Kalinowski J., Kreikemeyer B., Pedrotti M.-L., Gorsky G., Elineau A., Labrenz M., Oberbeckmann S.
220	Characterization of microbial response to petroleum hydrocarbon contamination in a lacustrine ecosystem	2021	10.1007/s11356-021-13885-8	Article	English	6	D’Ugo E., Bruno M., Mukherjee A., Chattopadhyay D., Giuseppetti R., De Pace R., Magurano F.
221	Metabolite fingerprinting, in vitro antimicrobial and antioxidant activities and in-silico docking in Alloteropsis cimicina and its endophytic fungus Penicillium pinophilum	2021	10.1007/s11033-021-06410-0	Article	English	3	Nischitha R., Shivanna M.B.
222	Molecular diversity and abundance of the microbial community associated to an offshore oil field on the southeast of Brazil	2021	10.1016/j.ibiod.2021.105215	Article	English	7	de Sousa Pires A., Dias G.M., Chagas de Oliveira Mariano D., Akamine R.N., Cruz de Albuquerque A.C., Groposo C., Soares Ribeiro C.M., de Figueiredo Vilela L., Neves B.C.
223	Effect of precooling with transcritical CO2 cycle on two types of LNG boil-off gas reliquefaction systems	2021	10.1016/j.jngse.2021.103876	Article	English	4	Kochunni S.K., Chowdhury K.
224	Quantification of natural microbial methane from generation to emission in the offshore Aquitaine: A basin modelling approach	2021	10.1016/j.marpetgeo.2021.104949	Article	English	2	Torelli M., Kowalewski I., Gervais V., Wendebourg J., Dupré S., Wolf S., Gout C., Deville E.
225	Co-delivery of ciprofloxacin and colistin using microcontainers for bacterial biofilm treatment	2021	10.1016/j.ijpharm.2021.120420	Article	English	3	Birk S.E., Mazzoni C., Mobasharah Javed M., Borre Hansen M., Krogh Johansen H., Anders Juul Haagensen J., Molin S., Hagner Nielsen L., Boisen A.
226	Influence of surface mineralogy on the activity of Halanaerobium sp. during microbial enhanced oil recovery (MEOR)	2021	10.1016/j.fuel.2020.119973	Article	English	7	Kögler F., Dopffel N., Mahler E., Hartmann F.S.F., Schulze-Makuch D., Visser F., Frommherz B., Herold A., Alkan H.
227	Rock-Hosted Subsurface Biofilms: Mineral Selectivity Drives Hotspots for Intraterrestrial Life	2021	10.3389/fmicb.2021.658988	Article	English	11	Casar C.P., Kruger B.R., Osburn M.R.
228	A novel biodemulsifier of Bacillus mojavensis XH1 – Oxalate decarboxylase with the potential for demulsification of oilfield emulsion	2021	10.1016/j.jhazmat.2020.124737	Article	English	18	Hou N., Wang Q., Sun Y., Li X., Song Q., Jiang X., Li B., Zhao X., Zang H., Li D., Li C.
229	Microbial engineering to produce fatty alcohols and alkanes	2021	10.1093/jimb/kuab011	Review	English	5	Sharma A., Yazdani S.S.
230	Bioremediation of various aromatic and emerging pollutants by Bacillus cereus sp. isolated from petroleum sludge	2021	10.2166/wst.2021.065	Article	English	5	Alhefeiti M.A., Athamneh K., Vijayan R., Ashraf S.S.
231	Structural insights into the methane-generating enzyme from a methoxydotrophic methanogen reveal a restrained gallery of post-translational modifications	2021	10.3390/microorganisms9040837	Article	English	4	Kurth J.M., Müller M.-C., Welte C.U., Wagner T.
232	Recalcitrant Staphylococcus aureus infections: Obstacles and solutions	2021	10.1128/iai.00694-20	Article	English	7	Rowe S.E., Beam J.E., Conlon B.P.
233	Siccirubricoccus phaeus sp. nov., isolated from oil reservoir water and emended description of the genus Siccirubricoccus	2021	10.1007/s10482-021-01516-8	Article	English	3	Li F.-L., Zhang Y.-X., Zhang Y.-K., Chen W.-F., Li W.-J., Wang L.
234	Combining chemical exchange saturation transfer and 1H magnetic resonance spectroscopy for simultaneous determination of metabolite concentrations and effects of magnetization exchange	2021	10.1002/mrm.28574	Article	English	6	Hoefemann M., Döring A., Fichtner N.D., Kreis R.
235	Long-term souring treatment using nitrate and biocides in high-temperature oil reservoirs	2021	10.1016/j.fuel.2020.119731	Article	English	10	Jurelevicius D., Ramos L., Abreu F., Lins U., de Sousa M.P., dos Santos V.V.C.M., Penna M., Seldin L.
236	Compositional changes of sedimentary microbes in the Yangtze River Estuary and their roles in the biochemical cycle	2021	10.1016/j.scitotenv.2020.143383	Article	English	11	Liu L., Sun F., Zhao H., Mi H., He S., Chen Y., Liu Y., Lan H., Zhang M., Wang Z.
237	Isolation and characterization of human pathogenic multidrug resistant bacteria associated with plastic litter collected in Zanzibar	2021	10.1016/j.jhazmat.2020.124591	Article	English	14	Rasool F.N., Saavedra M.A., Pamba S., Perold V., Mmochi A.J., Maalim M., Simonsen L., Buur L., Pedersen R.H., Syberg K., Jelsbak L.
238	The effect of ultrasonic antifouling control on the growth and microbiota of farmed European sea bass (Dicentrarchus labrax)	2021	10.1016/j.marpolbul.2021.112072	Article	English	7	Knobloch S., Philip J., Ferrari S., Benhaïm D., Bertrand M., Poirier I.
239	Engineering Native and Synthetic Pathways in Pseudomonas putida for the Production of Tailored Polyhydroxyalkanoates	2021	10.1002/biot.202000165	Review	English	33	Mezzina M.P., Manoli M.T., Prieto M.A., Nikel P.I.
240	Epilithic biofilm as a reservoir for functional virulence factors in wastewater-dominant rivers after WWTP upgrade	2021	10.1016/j.jes.2020.05.014	Article	English	5	Mao G., Liang J., Wang Q., Zhao C., Bai Y., Liu R., Liu H., Qu J.
241	Isolation and Identification of Typical Bacterial Strains from Eggshell Surface and Evaluation of Their Spoilage Potential in Liquid Whole Egg [鸡蛋壳表面典型菌株的分离鉴定及其对全蛋液致腐能力分析]	2021	10.7506/spkx1002-6630-20191214-159	Article	Chinese	0	Gong M., Ma Y., Wang R., Chi Y., Chi Y.
242	Mechanisms of Antibiotic Failure During Staphylococcus aureus Osteomyelitis	2021	10.3389/fimmu.2021.638085	Review	English	23	Gimza B.D., Cassat J.E.
243	Community Distribution of Biofilms along a Vertical Wellbore in a Deep Injection Well during Petroleum Production	2021	10.1021/acs.energyfuels.0c02963	Article	English	2	Zhu P., Song Z., Wu X., Xu P., Zhang X., Zhu W.
244	Zn-contained mussel-inspired film on Mg alloy for inhibiting bacterial infection and promoting bone regeneration	2021	10.1093/rb/rbaa044	Article	English	16	Peng F., Cheng S., Zhang R., Li M., Zhou J., Wang D., Zhang Y.
245	Strain characterization of streptococcus suis serotypes 28 and 31, which harbor the resistance genes optra and ant(6)-ia	2021	10.3390/pathogens10020213	Article	English	2	Wang S., Zhang D., Jiang C., He H., Cui C., Duan W., Hu S., Wang J., Cai X.
246	Xylanimonas oleitrophica sp. nov., a novel petroleum hydrocarbon degrading bacterium isolated from an Indian oil reservoir	2021	10.1007/s10482-020-01506-2	Article	English	1	Nagkirti P.D., Engineer A.S., Dhakephalkar P.K.
247	Seismic assessment of wind turbines: How crucial is rotor-nacelle-assembly numerical modeling?	2021	10.1016/j.soildyn.2020.106483	Article	English	9	Ali A., De Risi R., Sextos A.
248	Assessment of the microbial community and biocide resistance profile in production and injection waters from an Andean oil reservoir in Colombia	2021	10.1016/j.ibiod.2020.105137	Article	English	3	Bedoya K., Niño J., Acero J., Cabarcas F., Alzate J.F.
249	Fluoroquinolone Resistance and Virulence Properties among Wastewater Aeromonas caviae Isolates	2021	10.1089/mdr.2019.0287	Article	English	3	Nowrotek M., Jałowiecki L., Płaza G.
250	Bacterial community analysis of biofilm on API 5LX carbon steel in an oil reservoir environment	2021	10.1007/s00449-020-02447-w	Article	English	8	Elumalai P., AlSalhi M.S., Mehariya S., Karthikeyan O.P., Devanesan S., Parthipan P., Rajasekar A.
251	Molecular interaction between methicillin-resistant Staphylococcus aureus (MRSA) and chicken breast reveals enhancement of pathogenesis and toxicity for food-borne outbreak	2021	10.1016/j.fm.2020.103602	Article	English	9	Chung H.Y., Kim Y.-T., Kwon J.-G., Im H.H., Ko D., Lee J.-H., Choi S.H.
252	Validation of Numerical Models of the Offshore Wind Turbine from the Alpha Ventus Wind Farm against Full-Scale Measurements within OC5 Phase III	2021	10.1115/1.4047378	Article	English	3	Popko W., Robertson A., Jonkman J., Wendt F., Thomas P., Müller K., Kretschmer M., Hagen T.R., Galinos C., Le Dreff J.-B., Gilbert P., Auriac B., Oh S., Qvist J., Sørum S.Hø., Suja-Thauvin L., Shin H., Molins C., Trubat P., Bonnet P., Bergua R., Wang K., Fu P., Cai J., Cai Z., Alexandre A., Harries R.
253	Enhanced biofilm and extracellular matrix production by chronic carriage versus acute isolates of Salmonella Typhi	2021	10.1371/journal.ppat.1009209	Article	English	3	Devaraj A., González J.F., Eichar B., Thilliez G., Kingsley R.A., Baker S., Allard M.W., Bakaletz L.O., Gunn J.S., Goodman S.D.
254	Bacterial 3′UTRs: A Useful Resource in Post-transcriptional Regulation	2021	10.3389/fmolb.2020.617633	Review	English	6	Menendez-Gil P., Toledo-Arana A.
255	Phenotypic and genotypic characterization of biofilm forming, antimicrobial resistant, pathogenic Escherichia coli isolated from Indian dairy and meat products	2021	10.1016/j.ijfoodmicro.2020.108899	Article	English	23	Bhardwaj D.K., Taneja N.K., DP S., Chakotiya A., Patel P., Taneja P., Sachdev D., Gupta S., Sanal M.G.
256	Legal protection of microbial biodiversity	2021	10.1016/b978-0-323-90148-2.00004-3	Book Chapter	English	0	Arya R., Shinde S.
257	Bioactivity of soil microorganisms for agriculture development	2021	10.1016/b978-0-12-824448-7.00012-7	Book Chapter	English	3	Tripathi M., Gaur R.
258	PAT-PseAAC: Prediction of acetyl threonine in protein sites with statistical moments and chou's 5 step rule	2021	10.1109/icic53490.2021.9692968	Conference Paper	English	0	Naseem S.
259	Using Transfer Learning to contextually Optimize Optical Character Recognition (OCR) output and perform new Feature Extraction on a digitized cultural and historical dataset	2021	10.1109/bigdata52589.2021.9671586	Conference Paper	English	0	Inbasekaran A., Gnanasekaran R.K., Marciano R.
260	Two regulatory factors of Vibrio cholerae activating the mannose-sensitive haemagglutinin pilus expression is important for biofilm formation and colonization in mice	2021	10.1099/mic.0.001098	Article	English	2	Shi M., Zheng Y., Wang X., Wang Z., Yang M.
261	Using X-vectors for speech activity detection in broadcast streams	2021	10.21437/interspeech.2021-192	Conference Paper	English	1	Mateju L., Kynych F., Cerva P., Zdansky J., Malek J.
262	Using DNA-logging to determine inflow profile in horizontal wells	2021	10.2118/spe-206515-ms	Conference Paper	English	0	Posdyshev A.S., Shelyakin P.V., Shaikhutdinov N.M., Popov A.A., Logacheva M.D., Tutukina M.N., Gelfand M.S.
263	Roseomonas oleicola sp. Nov., isolated from an oil production mixture in yumen oilfield, and emended description of roseomonas frigidaquae	2021	10.1099/ijsem.0.005064	Article	English	1	Wu D., Liu H., Zhou Y., Wu X., Nie Y., Cai M.
264	Bacterial diversity of heavy crude oil based mud samples near Omani oil wells	2021	10.1080/10916466.2021.1980011	Article	English	1	Al-Sayegh A., Al-Wahaibi Y., Joshi S.J., Al-Bahry S., Elshafie A., Al-Bemani A.
265	Experimental investigation of the coupling between aero- And hydrodynamical loads on a 12 MW semi-submersible floating wind turbine	2021	10.1115/omae2021-62980	Conference Paper	English	3	Thys M., Souza C., Sauder T., Fonseca N., Berthelsen P.A., Engebretsen E., Haslum H.
266	Thermosynergistes pyruvativorans gen. Nov., sp. nov., an anaerobic, pyruvate-degrading bacterium from shengli oilfield, and proposal of thermosynergistaceae fam. nov. in the phylum synergistetes	2021	10.1099/ijsem.0.005031	Article	English	1	Yang M., Li J., Lv X.-M., Dai L.-R., Wu K.-J., Tu B., Lawson P.A., Tang Y.-Q., Cheng L.
267	Sentence boundary augmentation for neural machine translation robustness	2021	10.1109/icassp39728.2021.9413492	Conference Paper	English	2	Li D., Te I., Arivazhagan N., Cherry C., Padfield D.
268	Integrated Analysis of the Roles of RNA Binding Proteins and Their Prognostic Value in Clear Cell Renal Cell Carcinoma	2021	10.1155/2021/5568411	Article	English	2	Wang B., Zhao H., Ni S., Ding B.
269	Identification and Phylogenetic Analyses of Anaerobic Sulfidogenic Bacteria in Two Algerian Oilfield Water Injection Samples	2021	10.1080/01490451.2021.1939814	Article	English	1	Lenchi N., Kebbouche-Gana S., Servais P., Gana M.L., Llirós M.
270	A comparison of time domain seismic analysis methods for offshore wind turbine structures: Superelement approach versus integrated approach	2021	10.1115/iowtc2021-3552	Conference Paper	English	0	Collier W., Alblas L., Wu J.H.
271	Simplified aerodynamic loading model for non-production conditions for floating wind systems design	2021	10.1115/iowtc2021-3516	Conference Paper	English	0	Alexandre A., Antonutti R., Gentils T., Mutricy L., Weyne P.
272	Metabolite fingerprinting of novel streptomyces uk-238 from the hima-layan forest	2021	10.2174/1573412916666200206160836	Article	English	0	Srivastava N., Sarethy I.P.
273	A high prevalence of blaOXA-48 in Klebsiella (Raoultella) ornithinolytica and related species in hospital wastewater in South West England	2021	10.1099/mgen.0.000509	Article	English	6	Gibbon M.J., Couto N., David S., Barden R., Standerwick R., Jagadeesan K., Birkwood H., Dulyayangkul P., Avison M.B., Kannan A., Kibbey D., Craft T., Habib S., Thorpe H.A., Corander J., Kasprzyk-Hordern B., Feil E.J.
274	Identification of anti-microbial peptides and traces of microbial DNA in infrainfundibular compartments of human scalp terminal hair follicles	2021	10.1684/ejd.2020.3948	Article	English	3	Polak-Witka K., Constantinou A., Schwarzer R., Helmuth J., Wiessner A., Hadam S., Kanti V., Rancan F., Andruck A., Richter C., Moter A., Edelmann A., Rudnicka L., Blume-Peytavi U., Vogt A.
275	SARS-CoV-2 viral budding and entry can be modeled using BSL-2 level virus-like particles	2021	10.1074/jbc.ra120.016148	Review	English	39	Plescia C.B., David E.A., Patra D., Sengupta R., Amiar S., Su Y., Stahelin R.V.
276	Sulfur metabolites play key system-level roles in modulating denitrification	2021	10.1128/msystems.01025-20	Article	English	6	Otwell A.E., Carr A.V., Majumder E.L.W., Ruiz M.K., Wilpiszeski R.L., Hoang L.T., Webb B., Turkarslan S., Gibbons S.M., Elias D.A., Stahl D.A., Siuzdak G., Baliga N.S.
277	Cupidesulfovibrio liaohensis gen. Nov., sp. nov., a novel sulphate-reducing bacterium isolated from an oil reservoir and reclassification of desulfovibrio oxamicus and desulfovibrio termitidis as cupidesulfovibrio oxamicus comb. nov. and cupidesulfovibrio termitidis comb. nov.	2021	10.1099/ijsem.0.004618	Article	English	5	Wan Y.Y., Luo N., Liu X.-L., Lai Q.-L., Goodfellow M.
278	Time Series Analysis of Production Decline in Carbonate Reservoirs with Machine Learning	2021	10.1155/2021/6638135	Article	English	3	Wang L., Shao M., Kou G., Wang M., Zhang R., Wei Z., Sun X.
279	Molecular, biochemical, and phenotypic identification of phenol and cresol degrading acinetobacter baumanni strain selected from al-rumaila oil well	2021	10.37506/ijfmt.v15i1.13773	Article	English	0	Ali N.M., Al-Saadi A.G.M.
280	Synergistic effect of abietic acid with oxacillin against methicillin-resistant staphylococcus pseudintermedius	2021	10.3390/antibiotics10010080	Article	English	9	Buommino E., Vollaro A., Nocera F.P., Lembo F., Dellagreca M., De Martino L., Catania M.R.
281	Ecological distribution and potential roles of Woesearchaeota in anaerobic biogeochemical cycling unveiled by genomic analysis	2021	10.1016/j.csbj.2021.01.013	Article	English	12	Liu X., Wang Y., Gu J.-D.
282	Azospirillum oleiclasticum sp. nov, a nitrogen-fixing and heavy oil degrading bacterium isolated from an oil production mixture of Yumen Oilfield	2021	10.1016/j.syapm.2020.126171	Article	English	5	Wu D., Zhang X.-J., Liu H.-C., Zhou Y.-G., Wu X.-L., Nie Y., Kang Y.-Q., Cai M.
283	Can preprocedural mouthrinses reduce SARS-CoV-2 load in dental aerosols?	2021	10.1016/j.mehy.2020.110436	Article	English	13	Reis I.N.R., do Amaral G.C.L.S., Mendoza A.A.H., das Graças Y.T., Mendes-Correa M.C., Romito G.A., Pannuti C.M.
284	Evidence of sporulation capability of the ubiquitous oil reservoir microbe Halanaerobium congolense	2021	10.1080/01490451.2020.1842944	Article	English	2	Jones A.A., Pilloni G., Claypool J.T., Paiva A.R., Summers Z.M.
285	Fore-aft and the side-to-side response of monopile supported offshore wind turbine in liquefiable soil	2021	10.1080/1064119x.2020.1843570	Article	English	6	Patra S.K., Haldar S.
286	Dominant and Active Methanogens in the Production Waters From a High-Temperature Petroleum Reservoir by DNA- and RNA-Based Analysis	2021	10.1080/01490451.2020.1822958	Article	English	1	Zhou L., Hu Q.-Q., Lu Y.-W., Mbadinga S.M., Liu Y.-F., Li X.-X., Wang B., Lv H., Liu J.-F., Yang S.-Z., Gu J.-D., Mu B.-Z.
287	Microplastics and their associated organic pollutants from the coastal waters of the central Adriatic Sea (Italy): Investigation of adipogenic effects in vitro	2021	10.1016/j.chemosphere.2020.128090	Article	English	13	Capriotti M., Cocci P., Bracchetti L., Cottone E., Scandiffio R., Caprioli G., Sagratini G., Mosconi G., Bovolin P., Palermo F.A.
288	Abiotic factors influencing soil microbial activity in the northern Antarctic Peninsula region	2021	10.1016/j.scitotenv.2020.141602	Article	English	2	Díaz-Puente F.J., Schmid T., Pelayo M., Rodríguez-Rastrero M., Herraiz M.J.S., O'Neill T., López-Martínez J.
289	Biofilms: Hot spots of horizontal gene transfer (HGT) in aquatic environments, with a focus on a new HGT mechanism	2021	10.1093/femsec/fiaa031	Review	English	103	Abe K., Nomura N., Suzuki S.
290	Effects of aged oil sludge on soil physicochemical properties and fungal diversity revealed by high-throughput sequencing analysis	2021	10.1155/2018/9264259	Article	English	9	Wang H., Kuang S., Lang Q., Yu W.
291	Prediction of drug metabolites using neural machine translation	2020	10.1039/d0sc02639e	Article	English	10	Litsa E.E., Das P., Kavraki L.E.
292	Exploration of the environmental implications of ageing conventional oil reserves with relational analysis	2020	10.1016/j.scitotenv.2020.142371	Article	English	4	Parra R., Bukkens S.G.F., Giampietro M.
293	Modeling of interfacial tension in binary mixtures of CH4, CO2, and N2 - alkanes using gene expression programming and equation of state	2020	10.1016/j.molliq.2020.114454	Article	English	15	Mirzaie M., Tatar A.
294	Halomonas plays a central role in the syntrophic community of an alkaline oil reservoir with alkali-surfactant-polymer (ASP) flooding	2020	10.1016/j.scitotenv.2020.141333	Article	English	8	Chen Y., Pan J., Yun Y., Zhi B., Li G., Li M., Ma T.
295	Responses to the Hydrostatic Pressure of Surface and Subsurface Strains of Pseudothermotoga elfii Revealing the Piezophilic Nature of the Strain Originating From an Oil-Producing Well	2020	10.3389/fmicb.2020.588771	Article	English	4	Roumagnac M., Pradel N., Bartoli M., Garel M., Jones A.A., Armougom F., Fenouil R., Tamburini C., Ollivier B., Summers Z.M., Dolla A.
296	Understanding Microbial Community Dynamics in Up-Flow Bioreactors to Improve Mitigation Strategies for Oil Souring	2020	10.3389/fmicb.2020.585943	Article	English	5	Dutta A., Smith B., Goldman T., Walker L., Streets M., Eden B., Dirmeier R., Bowman J.S.
297	Numerical modeling on the influence of effective porosity, microbial kinetics, and operational parameters on enhanced oil recovery by microbial flooding within a sandstone formation	2020	10.2118/200639-pa	Article	English	5	Chakraborty S., Govindarajan S.K., Gummadi S.N.
298	The diverse roles of the global transcriptional regulator phop in the lifecycle of yersinia pestis	2020	10.3390/pathogens9121039	Review	English	2	Fukuto H.S., Viboud G.I., Vadyvaloo V.
299	Compositions and Co-occurrence Patterns of Bacterial Communities Associated With Polymer- and ASP-Flooded Petroleum Reservoir Blocks	2020	10.3389/fmicb.2020.580363	Article	English	4	Ren G., Wang J., Qu L., Li W., Hu M., Bian L., Zhang Y., Le J., Dou X., Chen X., Bai L., Li Y.
300	Pharmaceutical disposal facilitates the mobilization of resistance determinants among microbiota of polluted environment	2020	10.1016/j.jsps.2020.10.009	Article	English	1	Azam M., Kumar V., Siddiqui K., Jan A.T., Sabir J.S.M., Rather I.A., Rehman S., Haq Q.M.R.
301	Rigorous framework determining residual gas saturations during spontaneous and forced imbibition using gene expression programming	2020	10.1016/j.jngse.2020.103644	Article	English	6	Rostami A., Raef A., Kamari A., Totten M.W., Abdelwahhab M., Panacharoensawad E.
302	Novel use of culturomics to identify the microbiota in hospital sink drains with and without persistent VIM-positive Pseudomonas aeruginosa	2020	10.1038/s41598-020-73650-8	Article	English	7	Pirzadian J., Harteveld S.P., Ramdutt S.N., van Wamel W.J.B., Klaassen C.H.W., Vos M.C., Severin J.A.
303	Experimental study on the tower loading characteristics of a floating wind turbine based on wave basin model tests	2020	10.1016/j.jweia.2020.104390	Article	English	6	Wen B., Li Z., Jiang Z., Peng Z., Dong X., Tian X.
304	A comprehensive and comparative study on the action of pentacyclic triterpenoids on Vibrio cholerae biofilms	2020	10.1016/j.micpath.2020.104493	Article	English	4	Bhattacharya S.P., Bhattacharya A., Sen A.
305	Evaluating the potential for autonomous measurements of net community production and calcification as a tool for monitoring coral restoration	2020	10.1016/j.ecoleng.2020.106042	Article	English	6	Platz M.C., Takeshita Y., Bartels E., Arias M.E.
306	The microbial community of a biofilm lining the wall of a pristine cave in Western New Guinea	2020	10.1016/j.micres.2020.126584	Article	English	11	Turrini P., Tescari M., Visaggio D., Pirolo M., Lugli G.A., Ventura M., Frangipani E., Visca P.
307	Simultaneous detection of transcribed functional assA gene and the corresponding metabolites of linear alkanes (C4, C5, and C7) in production water of a low-temperature oil reservoir	2020	10.1016/j.scitotenv.2020.141290	Article	English	3	Liu J.-F., Lu Y.-W., Zhou L., Li W., Hou Z.-W., Yang S.-Z., Wu X.-L., Gu J.-D., Mu B.-Z.
308	Carbon steel corrosion by bacteria from failed seal rings at an offshore facility	2020	10.1038/s41598-020-69292-5	Article	English	24	Salgar-Chaparro S.J., Darwin A., Kaksonen A.H., Machuca L.L.
309	Novel clostridial lineages recovered from metagenomes of a hot oil reservoir	2020	10.1038/s41598-020-64904-6	Article	English	6	Christman G.D., León-Zayas R.I., Zhao R., Summers Z.M., Biddle J.F.
310	Assigning a role for chemosensory signal transduction in Campylobacter jejuni biofilms using a combined omics approach	2020	10.1038/s41598-020-63569-5	Article	English	5	Tram G., Klare W.P., Cain J.A., Mourad B., Cordwell S.J., Day C.J., Korolik V.
311	Long-chain n-alkane biodegradation coupling to methane production in an enriched culture from production water of a high-temperature oil reservoir	2020	10.1186/s13568-020-00998-5	Article	English	10	Chen J., Liu Y.-F., Zhou L., Irfan M., Hou Z.-W., Li W., Mbadinga S.M., Liu J.-F., Yang S.-Z., Wu X.-L., Gu J.-D., Mu B.-Z.
312	Methanogenic biodegradation of C9 to C12 n-alkanes initiated by Smithella via fumarate addition mechanism	2020	10.1186/s13568-020-0956-5	Article	English	19	Ji J.-H., Zhou L., Mbadinga S.M., Irfan M., Liu Y.-F., Pan P., Qi Z.-Z., Chen J., Liu J.-F., Yang S.-Z., Gu J.-D., Mu B.-Z.
313	Evolutionary selection of biofilm-mediated extended phenotypes in Yersinia pestis in response to a fluctuating environment	2020	10.1038/s41467-019-14099-w	Article	English	13	Cui Y., Schmid B.V., Cao H., Dai X., Du Z., Ryan Easterday W., Fang H., Guo C., Huang S., Liu W., Qi Z., Song Y., Tian H., Wang M., Wu Y., Xu B., Yang C., Yang J., Yang X., Zhang Q., Jakobsen K.S., Zhang Y., Stenseth N.C., Yang R.
314	Managing Learning Resource Metadata for Secondary Education	2020	10.1145/3428757.3429148	Conference Paper	English	1	Göschlberger B., Dopler F., Brandstetter C.
315	Draft genome sequence of halomonas titanicae strain TAT1, a hydrocarbon-oxidizing halophilic bacterium isolated from a petroleum reservoir in Russia	2020	10.1128/mra.01255-20	Article	English	3	Grouzdev D.S., Sokolova D.S., Poltaraus A.B., Nazina T.N.
316	Patterns of in situ Mineral Colonization by Microorganisms in a ~60°C Deep Continental Subsurface Aquifer	2020	10.3389/fmicb.2020.536535	Article	English	3	Mullin S.W., Wanger G., Kruger B.R., Sackett J.D., Hamilton-Brehm S.D., Bhartia R., Amend J.P., Moser D.P., Orphan V.J.
317	Spatial and Temporal Dynamics in Attached and Suspended Bacterial Communities in Three Drinking Water Distribution Systems with Variable Biological Stability	2020	10.1021/acs.est.0c04532	Article	English	12	Vavourakis C.D., Heijnen L., Peters M.C.F.M., Marang L., Ketelaars H.A.M., Hijnen W.A.M.
318	Inhibition of campylobacter jejuni biofilm formation by d-amino acids	2020	10.3390/antibiotics9110836	Article	English	9	Elgamoudi B.A., Taha T., Korolik V.
319	Comparative study on thermodynamic and geochemical characteristics between cemented and clotted parts of thrombolite	2020	10.3390/cryst10111017	Article	English	0	Zhuang D., Guo Y., Chen S.
320	Mild hydrostatic-pressure (15 MPa) affects the assembly, but not the growth, of oil-degrading coastal microbial communities tested under limiting conditions (5°C, no added nutrients)	2020	10.1093/femsec/fiaa160	Article	English	3	Barbato M., Scoma A.
321	Use of bacteria community analysis to distinguish groundwater recharge sources to shallow wells	2020	10.1002/jeq2.20150	Article	English	3	Higgins M.A., Robbins G.A., Maas K.R., Binkhorst G.K.
322	Enhanced Oil Recovery by Potential Biosurfactant-Producing Halo-thermotolerant Bacteria Using Soil Washing and Sand-Packed Glass Column Techniques	2020	10.1007/s00284-020-02172-3	Article	English	5	Phulpoto I.A., Jakhrani B.A., Phulpoto A.H., Panhyar A.A., Kanhar N.A., Ahmed S., Qazi M.A.
323	Metabolic and Hematological Responses to Endotoxin-Induced Inflammation in Chicks Experiencing Embryonic 2,3,7,8-Tetrachlorodibenzodioxin Exposure	2020	10.1002/etc.4832	Article	English	4	Amaral-Silva L., Tazawa H., Bícego K.C., Burggren W.W.
324	Antibiotics modulate biofilm formation in fish pathogenic isolates of atypical Aeromonas salmonicida	2020	10.1111/jfd.13232	Article	English	6	Desbois A.P., Cook K.J., Buba E.
325	Improvement design and analysis of a supercritical CO2/transcritical CO2 combined cycle for offshore gas turbine waste heat recovery	2020	10.1016/j.energy.2020.118562	Article	English	21	Zhou A., Li X.-S., Ren X.-D., Gu C.-W.
326	Metabolomic modulations in a freshwater microbial community exposed to the fungicide azoxystrobin	2020	10.1016/j.jes.2020.04.013	Article	English	6	Zhang M., Liu W., Qu Q., Ke M., Zhang Z., Zhou Z., Lu T., Qian H.
327	Comparative analysis of bacterial community and functional species in oil reservoirs with different in situ temperatures	2020	10.1007/s10123-020-00125-1	Article	English	2	Tian Y., Xue S., Ma Y.
328	Preserving Microbial Community Integrity in Oilfield Produced Water	2020	10.3389/fmicb.2020.581387	Article	English	2	Rachel N.M., Gieg L.M.
329	Prevalence of antibiotic resistance and virulence genes in the biofilms from an aquifer recharged with stormwater	2020	10.1016/j.watres.2020.116269	Article	English	12	Sidhu J.P.S., Gupta V.V.S.R., Stange C., Ho J., Harris N., Barry K., Gonzalez D., Van Nostrand J.D., Zhou J., Page D., Tiehm A., Toze S.
330	Bacterial community composition in produced water of Diyarbakır oil fields in Turkey Bacterial communities in produced waters of south-eastern Turkey reported in detail for the first time	2020	10.1595/205651320x15911723486216	Article	English	1	Tüccar T., Ilhan-Sungur E., Muyzer G.
331	Salivary biomarkers in the context of gingival inflammation in children with cystic fibrosis	2020	10.1002/jper.19-0415	Article	English	5	Yucel Z.P.K., Silbereisen A., Emingil G., Tokgoz Y., Kose T., Sorsa T., Tsilingaridis G., Bostanci N.
332	Reliable inkjet printing of chondrocytes and MSCs using reservoir agitation	2020	10.1088/1758-5090/aba2f8	Article	English	5	Dudman J.P.R., Ferreira A.M., Gentile P., Wang X., Ribeiro R.D.C., Benning M., Dalgarno K.W.
333	Functional microorganisms involved in the sulfur and nitrogen metabolism in production water from a high-temperature offshore petroleum reservoir	2020	10.1016/j.ibiod.2020.105057	Article	English	4	Zhou L., Wang D.-W., Zhang S.-L., Tang E.-G., Lu Y.-W., Jing Y.-F., Lin D.-D., Liu Z.-L., Liu J.-F., Yang S.-Z., Zhang J., Gu J.-D., Mu B.-Z.
334	Improved efficacy of bio-mineralization of human mesenchymal stem cells on modified PLLA nanofibers coated with bioactive materials via enhanced expression of integrin α2β1	2020	10.1002/pat.4952	Article	English	3	Andalib N., Kehtari M., Seyedjafari E., Motamed N., Matin M.M.
335	Impacts of chemical contamination on bacterio-phytoplankton coupling	2020	10.1016/j.chemosphere.2020.127165	Article	English	8	Pringault O., Bouvy M., Carre C., Fouilland E., Meddeb M., Mejri K., Leboulanger C., Sakka Hlaili A.
336	Modelling the Shimokita deep coalbed biosphere over deep geological time: Starvation, stimulation, material balance and population models	2020	10.1111/bre.12399	Article	English	1	Bowden S.A., Mohamed A.Y., Edilbi A.N.F., Lin Y.-S., Morono Y., Hinrichs K.-U., Inagaki F.
337	Research status of technology for obtaining methane by biotransformation of CO2 geologically stored in oil reservoirs [油藏地质封存中CO2生物转化CH4的资源化利用技术研究现状]	2020	10.16606/j.cnki.issn0253-4320.2020.09.007	Article	Chinese	0	Niu J.-J., Liu Q., Peng B.
338	Exploring microcystin-degrading bacteria thriving on recycled membranes during a cyanobacterial bloom	2020	10.1016/j.scitotenv.2020.139672	Article	English	9	Morón-López J., Nieto-Reyes L., Molina S., Lezcano M.Á.
339	qPCR-based assessment of microfaunal indicators of oil for monitoring benthos around oil and gas platforms	2020	10.1016/j.scitotenv.2020.139527	Article	English	5	Krolicka A., Gomiero A., Baussant T.
340	Methanogens Within a High Salinity Oil Reservoir From the Gulf of Mexico	2020	10.3389/fmicb.2020.570714	Article	English	2	Christman G.D., León-Zayas R.I., Summers Z.M., Biddle J.F.
341	Metagenomic Insights Into the Mechanisms for Biodegradation of Polycyclic Aromatic Hydrocarbons in the Oil Supply Chain	2020	10.3389/fmicb.2020.561506	Review	English	25	Hidalgo K.J., Sierra-Garcia I.N., Dellagnezze B.M., de Oliveira V.M.
342	Fungal Community, Metabolic Diversity, and Glomalin-Related Soil Proteins (GRSP) Content in Soil Contaminated With Crude Oil After Long-Term Natural Bioremediation	2020	10.3389/fmicb.2020.572314	Article	English	13	Gałązka A., Grządziel J., Gałązka R., Gawryjołek K., Ukalska-Jaruga A., Smreczak B.
343	Characterization and efficient production of a thermostable, halostable and organic solvent-stable cellulase from an oil reservoir	2020	10.1016/j.ijbiomac.2020.05.021	Article	English	10	Zhu T., Li R., Sun J., Cui Y., Wu B.
344	Silver nanoparticles and their role in gene expression of motility gene motB and repression of AI-2-controlled gene	2020	10.21123/bsj.2020.17.3(suppl.).0916	Article	English	0	Mahmood B.S.
345	Microbial Biodegradation of Paraffin Wax in Malaysian Crude Oil Mediated by Degradative Enzymes	2020	10.3389/fmicb.2020.565608	Article	English	15	Adlan N.A., Sabri S., Masomian M., Ali M.S.M., Rahman R.N.Z.R.A.
346	Relationship between the growth and metabolism of indigenous microorganisms and oil displacement efficiency during dynamic displacement [动态驱替内源微生物生长代谢与驱油效率关系]	2020	10.7623/syxb202009009	Article	Chinese	0	Hu J., Guo L., Sun G., Wu X., Song Y., Lin J., Wang W., Cao Y., Wang Z.
347	Anaerobic Degradation of Paraffins by Thermophilic Actinobacteria under Methanogenic Conditions	2020	10.1021/acs.est.0c02071	Article	English	24	Liu Y.-F., Chen J., Liu Z.-L., Shou L.-B., Lin D.-D., Zhou L., Yang S.-Z., Liu J.-F., Li W., Gu J.-D., Mu B.-Z.
348	Dominance of Pseudomonas in bacterial community and inhibition of fumarate addition pathway by injection of nutrients in oil reservoir revealed by functional gene and their transcript analyses	2020	10.1016/j.ibiod.2020.105039	Article	English	6	Liu J.-F., Lu Y.-W., Liu X.-B., Li B.-G., Sun Y.-F., Zhou L., Liu Y.-F., Yang S.-Z., Gu J.-D., Mu B.-Z.
349	Factors controlling organic carbon distributions in a riverine wetland	2020	10.1007/s11356-020-09685-1	Article	English	8	Dong J., Zhao D., Zhang C., Cao Q., Fang J., Yang R., Ji S., Li C., Zhao R., Liu J.
350	Petroleum migration and accumulation in the Liuchu area of Raoyang Sag, Bohai Bay Basin, China	2020	10.1016/j.petrol.2020.107276	Article	English	6	Song J., Huo Z., Fu G., Hu M., Sun T., Liu Z., Wang W., Liu L.
351	Item response theory to estimate the latent ability of speech synthesizers	2020	10.3233/faia200304	Conference Paper	English	1	Santos Oliveira C., Tenório C.C.A., Prudêncio R.B.C.
352	A comparative metagenomic study reveals microbial diversity and their role in the biogeochemical cycling of Pangong lake	2020	10.1016/j.scitotenv.2020.139074	Article	English	40	Rathour R., Gupta J., Mishra A., Rajeev A.C., Dupont C.L., Thakur I.S.
353	Application of modified GMDH network for CO2-oil minimum miscibility pressure prediction	2020	10.1080/15567036.2019.1604908	Review	English	2	Huang W., Du Y., Ren H., Guo J., Wang R., Wang Z., Zhao L., Hao Z.
354	Staphylococcal Biofilm Development: Structure, Regulation, and Treatment Strategies	2020	10.1128/mmbr.00026-19	Review	English	129	Schilcher K., Horswill A.R.
355	Pseudomonas Saliphila sp. nov., a Bacterium Isolated from Oil-Well Production Water in Qinghai Oilfield of China	2020	10.1007/s00284-020-01986-5	Article	English	7	Zhang X.-J., Liu H.-C., Zhou Y.-G., Wu X.-L., Nie Y., Li Q.-R., Wang M.-Z., Zhao L., Cai M., Kang Y.-Q.
356	Tepidiphilus baoligensis sp. nov., a Novel Bacterium of the Family Hydrogenophilaceae Isolated from an Oil Reservoir	2020	10.1007/s00284-020-01983-8	Article	English	3	Zhang X., Wang G., Ma X., Yu J., You J., Xue Y., Ma Y.
357	Geochemistry and Microbiology Predict Environmental Niches With Conditions Favoring Potential Microbial Activity in the Bakken Shale	2020	10.3389/fmicb.2020.01781	Article	English	9	Tinker K., Gardiner J., Lipus D., Sarkar P., Stuckman M., Gulliver D.
358	Acinetobacter baumannii NCIMB8209: A rare environmental strain displaying extensive insertion sequence-mediated genome remodeling resulting in the loss of exposed cell structures and defensive mechanisms	2020	10.1128/msphere.00404-20	Article	English	5	Repizo G.D., Espariz M., Seravalle J.L., Miloslavich J.I.D., Steimbrüch B.A., Shuman H.A., Viale A.M.
359	Understanding leptospirosis ecoepidemiology by environmental dna metabarcoding of irrigation water from two agro-ecological regions of Sri Lanka	2020	10.1371/journal.pntd.0008437	Article	English	9	Gamage C.D., Sato Y., Kimura R., Yamashiro T., Toma C.
360	Microbial Community Composition in Crude Oils and Asphalts from the Kurdistan Region of Iraq	2020	10.1080/01490451.2020.1753131	Article	English	11	Shlimon A.G., Mansurbeg H., Othman R.S., Gittel A., Aitken C.M., Head I.M., Finster K.W., Kjeldsen K.U.
361	Microbial community composition and diversity in production water of a high-temperature offshore oil reservoir assessed by DNA- and RNA-based analyses	2020	10.1016/j.ibiod.2020.104970	Article	English	17	Zhou L., Lu Y.-W., Wang D.-W., Zhang S.-L., Tang E.-G., Qi Z.-Z., Xie S.-N., Wu J., Liang B., Liu J.-F., Yang S.-Z., Zhang J., Gu J.-D., Mu B.-Z.
362	Diversity of sulfate-reducing prokaryotes in petroleum production water and oil samples	2020	10.1016/j.ibiod.2020.104966	Article	English	11	Santos J.C.D., Lopes D.R.G., Da Silva J.D., De Oliveira M.D., Dias R.S., Lima H.S., De Sousa M.P., De Paula S.O., Silva C.C.D.
363	Aerosticca soli gen. nov., sp. nov., an aerobic gammaproteobacterium isolated from crude oil-contaminated soil	2020	10.1007/s00203-020-01819-w	Article	English	3	Watanabe M., Kojima H., Fukui M.
364	Different metabolism of EPA, DPA and DHA in humans: A double-blind cross-over study	2020	10.1016/j.plefa.2019.102033	Article	English	20	Guo X.-F., Tong W.-F., Ruan Y., Sinclair A.J., Li D.
365	Microbial characteristics of Shunbei faulted-karst reservoirs and prediction of play fairways, Tarim Basin [塔里木盆地顺北断溶体油气藏微生物特征及有利区预测]	2020	10.11743/ogg20200313	Article	Chinese	3	Yan L., Ji M., Jia B., Chen X., Gao P.
366	Natural attenuation of spilled crude oil by cold-adapted soil bacterial communities at a decommissioned High Arctic oil well site	2020	10.1016/j.scitotenv.2020.137258	Article	English	17	Ferguson D.K., Li C., Jiang C., Chakraborty A., Grasby S.E., Hubert C.R.J.
367	Metabolic traits of bovine shiga toxin-producing escherichia coli (STEC) strains with different colonization properties	2020	10.3390/toxins12060414	Article	English	2	Barth S.A., Weber M., Schaufler K., Berens C., Geue L., Menge C.
368	Porphyromonas gingivalis hmuy and streptococcus gordonii gapdh—novel heme acquisition strategy in the oral microbiome	2020	10.3390/ijms21114150	Article	English	3	Ślęzak P., Śmiga M., Smalley J.W., Siemińska K., Olczak T.
369	Microbial ecology of atlantic salmon (Salmo salar) hatcheries: Impacts of the built environment on fish mucosal microbiota	2020	10.1128/aem.00411-20	Article	English	30	Minich J.J., Poore G.D., Jantawongsri K., Johnston C., Bowie K., Bowman J., Knight R., Nowak B., Allen E.E.
370	Densely populated water droplets in heavy-oil seeps	2020	10.1128/aem.00164-20	Article	English	7	Pannekens M., Voskuhl L., Meier A., Müller H., Haque S., Frösler J., Brauer V.S., Meckenstock R.U.
371	Investigation of the thermoeconomic improvement of integrating enhanced geothermal single flash with transcritical organic Rankine cycle	2020	10.1016/j.enconman.2020.112831	Article	English	23	Hassani Mokarram N., Mosaffa A.H.
372	Microbiologically influenced corrosion as a function of environmental conditions: A laboratory study using oilfield multispecies biofilms	2020	10.1016/j.corsci.2020.108595	Article	English	12	Salgar-Chaparro S.J., Lepkova K., Pojtanabuntoeng T., Darwin A., Machuca L.L.
373	Modeling relative permeability of gas condensate reservoirs: Advanced computational frameworks	2020	10.1016/j.petrol.2020.106929	Article	English	19	Mahdaviara M., Menad N.A., Ghazanfari M.H., Hemmati-Sarapardeh A.
374	In Situ Analysis of Methanogenic Pathways and Biogeochemical Features of CBM Co-produced Water from the Shizhuangnan Block in the Southern Qinshui Basin, China	2020	10.1021/acs.energyfuels.9b04351	Article	English	9	Li Y., Tang S., Zhang S., Xi Z.
375	Potential applications of microbial enhanced oil recovery to heavy oil	2020	10.1080/07388551.2020.1739618	Review	English	25	Zhang J., Gao H., Xue Q.
376	State-of-the-art modeling permeability of the heterogeneous carbonate oil reservoirs using robust computational approaches	2020	10.1016/j.fuel.2020.117389	Article	English	20	Mahdaviara M., Rostami A., Shahbazi K.
377	Directional culture of petroleum hydrocarbon degrading bacteria for enhancing crude oil recovery	2020	10.1016/j.jhazmat.2020.122160	Article	English	10	Li H., Lai R., Jin Y., Fang X., Cui K., Sun S., Gong Y., Li H., Zhang Z., Zhang G., Zhang Z.
378	Molecular determinants of surface colonisation in diarrhoeagenic Escherichia coli (DEC): From bacterial adhesion to biofilm formation	2020	10.1093/femsre/fuaa008	Review	English	22	Ageorges V., Monteiro R., Leroy S., Burgess C.M., Pizza M., Chaucheyras-Durand F., Desvaux M.
379	Modeling reactive flow on carbonates with realistic porosity and permeability fields	2020	10.1016/j.advwatres.2020.103564	Article	English	6	de Paulo Ferreira L., Surmas R., Tonietto S.N., da Silva M.A.P., Peçanha R.P.
380	Virulence properties and antimicrobial resistance of Pseudomonas aeruginosa isolated from cave waters at Roraima Tepui, Guayana Highlands	2020	10.1111/lam.13283	Article	English	3	Suárez P., Gutiérrez A.V., Salazar V., Puche M.L., Serrano Y., Martínez S., González G., Fernández-Delgado M.
381	In depth metagenomic analysis in contrasting oil wells reveals syntrophic bacterial and archaeal associations for oil biodegradation in petroleum reservoirs	2020	10.1016/j.scitotenv.2020.136646	Article	English	15	Sierra-Garcia I.N., Belgini D.R.B., Torres-Ballesteros A., Paez-Espino D., Capilla R., Santos Neto E.V., Gray N., de Oliveira V.M.
382	Comparison of sulfide-oxidizing Sulfurimonas strains reveals a new mode of thiosulfate formation in subsurface environments	2020	10.1111/1462-2920.14894	Article	English	14	Lahme S., Callbeck C.M., Eland L.E., Wipat A., Enning D., Head I.M., Hubert C.R.J.
383	Transcriptome analysis in Parhyale hawaiensis reveal sex-specific responses to AgNP and AgCl exposure	2020	10.1016/j.envpol.2020.113963	Article	English	10	Artal M.C., Pereira K.D., Luchessi A.D., Okura V.K., Henry T.B., Marques-Souza H., de Aragão Umbuzeiro G.
384	Low concentrations of sodium arsenite induce hepatotoxicity in prepubertal male rats	2020	10.1002/tox.22890	Article	English	6	Samelo R.R., da Cunha de Medeiros P., de Carvalho Cavalcante D.N., Aranha M.L.G., Duarte F.A., de Castro Í.B., Ribeiro D.A., Perobelli J.E.
385	Insight into a highly polymorphic endophyte isolated from the roots of the halophytic seepweed Suaeda salsa: Laburnicola rhizohalophila sp. nov. (Didymosphaeriaceae, Pleosporales)	2020	10.1016/j.funbio.2019.10.001	Article	English	10	Yuan Z., Druzhinina I.S., Wang X., Zhang X., Peng L., Labbé J.
386	The type IV pilin PilA couples surface attachment and cell-cycle initiation in Caulobacter crescentus	2020	10.1073/pnas.1920143117	Article	English	18	Medico L.D., Cerletti D., Schächle P., Christen M., Christen B.
387	Antimicrobial susceptibility pattern of stenotrophomonas species isolated from Mexico	2020	10.4314/ahs.v20i1.22	Article	English	6	Elufisan T.O., Luna I.C.R., Oyedara O.O., Varela A.S., García V.B., Oluyide B.O., Treviño S.F., López M.A.V., Guo X.
388	Enhanced removal of veterinary antibiotic from wastewater by photoelectroactive biofilm of purple anoxygenic phototroph through photosynthetic electron uptake	2020	10.1016/j.scitotenv.2020.136605	Article	English	8	Sun J., Yang P., Huang S., Li N., Zhang Y., Yuan Y., Lu X.
389	Diesel Biodegradation Capacities and Biosurfactant Production in Saline-Alkaline Conditions by Delftia sp NL1, Isolated from an Algerian Oilfield	2020	10.1080/01490451.2020.1722769	Article	English	3	Lenchi N., Kebbouche-Gana S., Servais P., Gana M.L., Llirós M.
390	Quantification of diacylglycerol and triacylglycerol species in human fecal samples by flow injection Fourier transform mass spectrometry	2020	10.1007/s00216-020-02416-y	Article	English	3	Ertl V.M., Höring M., Schött H.-F., Blücher C., Kjølbæk L., Astrup A., Burkhardt R., Liebisch G.
391	Total and subcellular Ti distribution and detoxification processes in Pontoporia blainvillei and Steno bredanensis dolphins from Southeastern Brazil	2020	10.1016/j.marpolbul.2020.110975	Article	English	4	Monteiro F., Lemos L.S., de Moura J.F., Rocha R.C.C., Moreira I., Di Beneditto A.P.M., Kehrig H.A., Bordon I.C., Siciliano S., Saint'Pierre T.D., Hauser-Davis R.A.
392	Pseudomonas jilinensis sp. nov., Isolated from Oil Production Water of Jilin Oilfield in China	2020	10.1007/s00284-019-01798-2	Review	English	4	Wang J.-W., Cai M., Nie Y., Hu B., Yang Y., Wu X.-L.
393	Construction of a Plasmonic Chip for Metabolic Analysis in Cervical Cancer Screening and Evaluation	2020	10.1002/smtd.201900469	Article	English	47	Shu W., Wang Y., Liu C., Li R., Pei C., Lou W., Lin S., Di W., Wan J.
394	Oral rinses in growth inhibition and treatment of Helicobacter pylori infection	2020	10.1186/s12866-020-01728-4	Article	English	6	Kashyap D., Baral B., Verma T.P., Sonkar C., Chatterji D., Jain A.K., Jha H.C.
395	Proposing a rigorous empirical model for estimating the bubble point pressure in heterogeneous carbonate reservoirs	2020	10.26804/ager.2020.02.02	Article	English	2	Rostami A., Daneshi A., Miri R.
396	Nutrient level determines biofilm characteristics and subsequent impact on microbial corrosion and biocide effectiveness	2020	10.1128/aem.02885-19	Article	English	32	Salgar-Chaparro S.J., Lepkova K., Pojtanabuntoeng T., Darwin A., Machuca L.L.
397	Deterministic tools to predict recovery performance of carbonated water injection	2020	10.1016/j.molliq.2019.111911	Article	English	16	Esene C., Zendehboudi S., Shiri H., Aborig A.
398	Unraveling how candida albicans forms sexual biofilms	2020	10.3390/jof6010014	Review	English	8	Perry A.M., Hernday A.D., Nobile C.J.
399	Candidatus Mcinerneyibacterium aminivorans gen. nov., sp. nov., the first representative of the candidate phylum Mcinerneyibacteriota phyl. nov. recovered from a high temperature, high salinity tertiary oil reservoir in north central Oklahoma, USA	2020	10.1016/j.syapm.2020.126057	Article	English	1	Yadav A., Vilcáez J., Farag I.F., Johnson B., Mueller K., Youssef N.H., Elshahed M.S.
400	Phomopsis tersa as Inhibitor of Quorum Sensing System and Biofilm Forming Ability of Pseudomonas aeruginosa	2020	10.1007/s12088-019-00840-y	Article	English	15	Meena H., Mishra R., Ranganathan S., Sarma V.V., Ampasala D.R., Kalia V.C., Lee J.-K., Siddhardha B.
401	Anisotropic ridge/groove microstructure for regulating morphology and biological function of Schwann cells	2020	10.1016/j.apmt.2019.100468	Article	English	18	Li G., Zhao X., Zhang L., Yang J., Cui W., Yang Y., Zhang H.
402	Process Evaluation for Petroleum Wastewater Co-digestion with Rye Grass to Enhance Methane Production	2020	10.1007/s12649-018-0473-9	Article	English	9	Ahmad A.
403	Isolation and Characterization of Biosurfactant-Producing Bacteria From Oil Well Batteries With Antimicrobial Activities Against Food-Borne and Plant Pathogens	2020	10.3389/fmicb.2020.00064	Article	English	27	Rani M., Weadge J.T., Jabaji S.
404	Lipid Droplet-Derived Monounsaturated Fatty Acids Traffic via PLIN5 to Allosterically Activate SIRT1	2020	10.1016/j.molcel.2019.12.003	Article	English	57	Najt C.P., Khan S.A., Heden T.D., Witthuhn B.A., Perez M., Heier J.L., Mead L.E., Franklin M.P., Karanja K.K., Graham M.J., Mashek M.T., Bernlohr D.A., Parker L., Chow L.S., Mashek D.G.
405	Copper stress in flooded soil: Impact on enzyme activities, microbial community composition and diversity in the rhizosphere of Salix integra	2020	10.1016/j.scitotenv.2019.135350	Article	English	23	Cao Y., Ma C., Chen H., Chen G., White J.C., Xing B.
406	One Biosurfactant-Producing Bacteria Achromobacter sp. A-8 and Its Potential Use in Microbial Enhanced Oil Recovery and Bioremediation	2020	10.3389/fmicb.2020.00247	Article	English	16	Deng Z., Jiang Y., Chen K., Li J., Zheng C., Gao F., Liu X.
407	Numerical investigation on the heating performance of a transcritical CO2 vapor-injection heat pump system	2020	10.1016/j.applthermaleng.2019.114656	Article	English	27	Peng X., Wang D., Wang G., Yang Y., Xiang S.
408	Network between cytokines, cortisol and occupational stress in gas and oilfield workers	2020	10.3390/ijms21031118	Article	English	5	Reale M., Costantini E., D’angelo C., Coppeta L., Mangifesta R., Jagarlapoodi S., Di Nicola M., Di Giampaolo L.
409	Distribution of Bacterial Communities in Petroleum-Contaminated Soils from the Dagang Oilfield, China	2020	10.1007/s12209-019-00226-7	Article	English	10	Feng X., Liu Z., Jia X., Lu W.
410	Prediction of Wax Appearance Temperature Using Artificial Intelligent Techniques	2020	10.1007/s13369-019-04290-y	Article	English	21	Benamara C., Gharbi K., Nait Amar M., Hamada B.
411	Analysis of bacterial microbiome associated with nylon and copper nets in an aquaculture context	2020	10.1016/j.aquaculture.2019.734540	Article	English	6	Canada P., Pereira A., Nogueira N., Png-Gonzalez L., Andrade C., Xavier R.
412	Selection and propagation of IncP conjugative plasmids following long-term anthropogenic metal pollution in river sediments	2020	10.1016/j.jhazmat.2019.121173	Article	English	6	Cyriaque V., Jacquiod S., Riber L., Abu Al-soud W., Gillan D.C., Sørensen S.J., Wattiez R.
413	Lipids	2020	10.1016/b978-0-323-66162-1.00004-4	Book Chapter	English	1	Jones P.J.H., Lichtenstein A.H.
414	Performance improvement of a supercritical CO2 and transcritical CO2 combined cycle for offshore gas turbine waste heat recovery	2020	10.1115/gt2020-14450	Conference Paper	English	0	Zhou A., Ren X.
415	Towards an ASR error robust spoken language understanding system	2020	10.21437/interspeech.2020-2844	Conference Paper	English	6	Ruan W., Nechaev Y., Chen L., Su C., Kiss I.
416	Microbacterium algeriense sp. Nov., a novel actinobacterium isolated from algerian oil production waters	2020	10.1099/ijsem.0.004434	Article	English	0	Lenchi N., Anzil A., Servais P., Kebbouche-Gana S., Gana M.L., Llirós M.
417	Distribution and expression of virulence genes in potentially pathogenic bacteria isolated from seafood in Thailand [Distribución y expresión de genes de virulencia en bacterias potencialmente patógenas aisladas de mariscos y pescados en Tailandia]	2020	10.1080/19476337.2020.1842502	Article	English	2	Nimnoi P., Pongsilp N.
418	Predicting fire resistance of SRC columns through gene expression programming	2020	10.1108/jsfe-04-2020-0013	Article	English	3	Hassani M., Safi M., Rasti Ardakani R., Saedi Daryan A.
419	A Curriculum Learning Based Approach to Captioning Ultrasound Images	2020	10.1007/978-3-030-60334-2_8	Conference Paper	English	4	Alsharid M., El-Bouri R., Sharma H., Drukker L., Papageorghiou A.T., Noble J.A.
420	Harnessing metal homeostasis offers novel and promising targets against candida albicans	2020	10.2174/1570163816666190227231437	Review	English	0	Hameed S., Hans S., Singh S., Fatima Z.
421	Viable bacterial communities on hospital window components in patient rooms	2020	10.7717/peerj.9580	Article	English	0	Horve P.F., Dietz L.G., Ishaq S.L., Kline J., Fretz M., Van Den Wymelenberg K.G.
422	Sphaerochaeta halotolerans sp. Nov., a novel spherical halotolerant spirochete from a russian heavy oil reservoir, emended description of the genus sphaerochaeta, reclassification of sphaerochaeta coccoides to a new genus parasphaerochaeta gen. nov. as parasphaerochaeta coccoides comb. nov. and proposal of sphaerochaetaceae fam. nov.	2020	10.1099/ijsem.0.004340	Article	English	4	Bidzhieva S.K., Sokolova D.S., Grouzdev D.S., Kostrikina N.A., Poltaraus A.B., Tourova T.P., Shcherbakova V.A., Troshina O.Y., Nazina T.N.
423	Identification of predictive factors of the degree of adherence to the Mediterranean diet through machine-learning techniques	2020	10.7717/peerj-cs.287	Article	English	2	Arceo-Vilas A., Fernandez-Lozano C., Pita S., Pértega-Díaz S., Pazos A.
424	Frigidibacter oleivorans sp. nov., isolated from a deep well with oil reservoir water	2020	10.1099/ijsem.0.004294	Article	English	1	Zhang Y.-X., Li F.-L., Ma S.-C., Zheng G.-D., Chen W.-F., Li W.-J., Wang L.
425	Tepidiphilus olei sp. nov., isolated from the production water of a water-flooded oil reservoir in PR China	2020	10.1099/ijsem.0.004297	Article	English	2	Wang X.-T., Shan J.-J., Li X.-Z., Lin W., Xiu J.-L., Li D.-A., Zhang Y.-Z., Wang L.
426	DHA Supplementation Attenuates MI-Induced LV Matrix Remodeling and Dysfunction in Mice	2020	10.1155/2020/7606938	Article	English	3	Habicht I., Mohsen G., Eichhorn L., Frede S., Weisheit C., Hilbert T., Treede H., Güresir E., Dewald O., Duerr G.D., Velten M.
427	Oleiliquidispirillum nitrogeniifigens gen. Nov., sp. nov., a nemember of the family rhodospirillaceae isolated from oil reservoir water	2020	10.1099/ijsem.0.004200	Article	English	1	Li F.-L., Wang X.-T., Shan J.-J., Li S., Zhang Y.-X., Li X.-Z., Li D.-A., Li W.-J., Wang L.
428	Zhaonella formicivorans gen. nov., sp. nov., an anaerobic formate-utilizing bacterium isolated from Shengli oilfield, and proposal of four novel families and Moorellales ord. nov. in the phylum Firmicutes	2020	10.1099/ijsem.0.004178	Article	English	3	Lv X.-M., Yang M., Dai L.-R., Tu B., Chang C., Huang Y., Deng Y., Lawson P.A., Zhang H., Cheng L., Tang Y.-Q.
429	Paracoccus alkanivorans sp. nov., isolated from a deep well with oil reservoir water	2020	10.1099/ijsem.0.004036	Article	English	4	Zhang Y.-X., Li X., Li F.-L., Ma S.-C., Zheng G.-D., Chen W.-F., Li W.-J., Wang L.
430	Sphingobacterium olei sp. Nov., isolated from oilcontaminated soil	2020	10.1099/ijsem.0.004000	Article	English	5	Liu B., Yang X., Sheng M., Yang Z., Qiu J., Wang C., He J.
431	Animal fat and glycerol bioconversion to polyhydroxyalkanoate by produced water bacteria	2020	10.1515/epoly-2020-0011	Article	English	5	Sohail R., Jamil N., Ali I., Munir S.
432	Genomic and transcriptomic evidence supports methane metabolism in Archaeoglobi	2020	10.1128/msystems.00651-19	Article	English	10	Liu Y.-F., Chen J., Zaramela L.S., Wang L.-Y., Mbadinga S.M., Hou Z.-W., Wu X.-L., Gu J.-D., Zengler K., Mu B.-Z.
433	Gudongella oleilytica gen. Nov., sp. nov., an aerotorelant bacterium isolated from Shengli oilfield and validation of family Tissierellaceae	2020	10.1099/ijsem.0.003854	Article	English	4	Wu K., Dai L., Tu B., Zhang X., Zhang H., Deng Y., Lawson P.A., Cheng L.
434	Effects of Air Injection on the Metabolic Activity of Emulsifier-Producing Bacteria from Oil Reservoirs	2020	10.1155/2020/8987258	Article	English	0	Gu Y., Wu Z., Wang G., Zhi B., Yu J., Fan H., Guo S., Ma T., Li G.
435	Biogeochemistry and water-rock interactions of coalbed methane co-produced water in the shizhuangnan block of the southern Qinshui Basin, China	2020	10.3390/w12010130	Article	English	2	Li Y., Tang S., Zhang S., Xi Z., Wang P.
436	Antibiotic and antibiofilm activities of Salvadora persica l. Essential oils against Streptococcus mutans: A detailed comparative study with chlorhexidine digluconate	2020	10.3390/pathogens9010066	Article	English	13	Khan M., Alkhathlan H.Z., Khan S.T.
437	Diversity of NC10 bacteria and ANME-2d archaea in sediments of fault zones at Lake Baikal	2020	10.3390/d12010010	Article	English	8	Lomakina A., Pogodaeva T., Kalmychkov G., Chernitsyna S., Zemskaya T.
438	Predicting the viscosity of petroleum emulsions using gene expression programming (GEP) and response surface methodology (RSM)	2020	10.1155/2020/6215352	Article	English	4	Umar A.A., Saaid I.M., Sulaimon A.A., Pilus R.M.
439	Grease waste as a reservoir of lipase-producing yeast and description of limtongella siamensis gen. Nov., sp. nov	2020	10.3390/microorganisms8010027	Article	English	8	Sakpuntoon V., Angchuan J., Boontham W., Khunnamwong P., Boonmak C., Srisuk N.
440	High abundance of Vibrio in tarball-contaminated seawater from Vagator beach, Goa, India	2020	10.1016/j.marpolbul.2019.110773	Article	English	2	Fernandes C., Khandeparker R.D.S., Shenoy B.D.
441	Fluid flow and late diagenesis of fault-infill carbonates in the Aptian dolostones at Jabel Semmama, Kasserine area, western-central Tunisia	2020	10.1016/j.marpetgeo.2019.07.051	Article	English	3	Hajri H., Abdallah H.
442	Calibrating and Scaling Semi-empirical Foam Flow Models for the Assessment of Foam-Based EOR Processes (in Heterogeneous Reservoirs)	2020	10.1007/s11242-018-01223-5	Article	English	9	Gassara O., Douarche F., Braconnier B., Bourbiaux B.
443	Integrative isotopic and molecular approach for the diagnosis and implementation of an efficient in-situ enhanced biological reductive dechlorination of chlorinated ethenes	2019	10.1016/j.watres.2019.115106	Article	English	9	Blázquez-Pallí N., Rosell M., Varias J., Bosch M., Soler A., Vicent T., Marco-Urrea E.
444	Nanoparticles for the Treatment of Oral Biofilms: Current State, Mechanisms, Influencing Factors, and Prospects	2019	10.1002/adhm.201901301	Review	English	22	Hu C., Wang L.-L., Lin Y.-Q., Liang H.-M., Zhou S.-Y., Zheng F., Feng X.-L., Rui Y.-Y., Shao L.-Q.
445	A cost-effective and environmentally sustainable process for phycoremediation of oil field formation water for its safe disposal and reuse	2019	10.1038/s41598-019-51806-5	Article	English	13	Das B., Deka S.
446	Preferential degradation of long-chain alkyl substituted hydrocarbons in heavy oil under methanogenic conditions	2019	10.1016/j.orggeochem.2019.103927	Article	English	12	Cheng L., Shi S.-B., Yang L., Zhang Y., Dolfing J., Sun Y.-G., Liu L.-Y., Li Q., Tu B., Dai L.-R., Shi Q., Zhang H.
447	Nutrients and heavy metals mediate the distribution of microbial community in the marine sediments of the Bohai Sea, China	2019	10.1016/j.envpol.2019.113069	Article	English	21	Lu M., Luo X., Jiao J.J., Li H., Wang X., Gao J., Zhang X., Xiao K.
448	Dynamics of a fishery system in a patchy environment with nonlinear harvesting	2019	10.1002/mma.5826	Article	English	6	Rani R., Gakkhar S., Moussaoui A.
449	Stability test of biosurfactant produced by Bacillus licheniformis DS1 using experimental design and its application for MEOR	2019	10.1016/j.petrol.2019.106383	Article	English	35	Purwasena I.A., Astuti D.I., Syukron M., Amaniyah M., Sugai Y.
450	High temperature utilization of PAM and HPAM by microbial communities enriched from oilfield produced water and activated sludge	2019	10.1186/s13568-019-0766-9	Article	English	10	Berdugo-Clavijo C., Sen A., Seyyedi M., Quintero H., O’Neil B., Gieg L.M.
451	Innovative processing techniques for altering the physicochemical properties of wholegrain brown rice (Oryza sativa L.)–opportunities for enhancing food quality and health attributes	2019	10.1080/10408398.2018.1491829	Review	English	39	Xia Q., Green B.D., Zhu Z., Li Y., Gharibzahedi S.M.T., Roohinejad S., Barba F.J.
452	Food Crop Irrigation with Oilfield-Produced Water Suppresses Plant Immune Response	2019	10.1021/acs.estlett.9b00539	Article	English	19	Miller H., Trivedi P., Qiu Y., Sedlacko E.M., Higgins C.P., Borch T.
453	Complementary DNA/RNA-Based Profiling: Characterization of Corrosive Microbial Communities and Their Functional Profiles in an Oil Production Facility	2019	10.3389/fmicb.2019.02587	Article	English	12	Salgar-Chaparro S.J., Machuca L.L.
454	Colombian Andean thermal springs: reservoir of thermophilic anaerobic bacteria producing hydrolytic enzymes	2019	10.1007/s00792-019-01132-5	Article	English	4	Rubiano-Labrador C., Díaz-Cárdenas C., López G., Gómez J., Baena S.
455	Microbial community structure associated with submarine groundwater discharge in northern Java (Indonesia)	2019	10.1016/j.scitotenv.2019.06.193	Article	English	32	Adyasari D., Hassenrück C., Oehler T., Sabdaningsih A., Moosdorf N.
456	Development of coupling module between BHawC aeroelastic software and OrcaFlex for coupled dynamic analysis of floating wind turbines	2019	10.1088/1742-6596/1356/1/012007	Conference Paper	English	3	Arramounet V., Winter C.E.D., Maljaars N., Girardin S., Robic H.
457	Metabolic profiling of a polyphenolic-rich fraction of: Coccinia grandis leaves using LC-ESI-MS/MS and in vivo validation of its antimicrobial and wound healing activities	2019	10.1039/c9fo01532a	Article	English	24	Al-Madhagy S.A., Mostafa N.M., Youssef F.S., Awad G.E.A., Eldahshan O.A., Singab A.N.B.
458	Vibrio cholerae strains with inactivated cqsS gene overproduce autoinducer-2 which enhances resuscitation of dormant environmental V. Cholerae	2019	10.1371/journal.pone.0223226	Article	English	4	Naser I.B., Mozammel Hoque M., Faruque S.N., Kamruzzaman M., Yamasaki S., Faruque S.M.
459	Modeling asphaltene precipitation during natural depletion of reservoirs and evaluating screening criteria for stability of crude oils	2019	10.1016/j.petrol.2019.05.078	Article	English	10	Hemmati-Sarapardeh A., Ahmadi M., Ameli F., Dabir B., Mohammadi A.H., Husein M.M.
460	Zn-incorporation with graphene oxide on Ti substrates surface to improve osteogenic activity and inhibit bacterial adhesion	2019	10.1002/jbm.a.36740	Article	English	29	Tao B., Chen M., Lin C., Lu L., Yuan Z., Liu J., Liao Q., Xia Z., Peng Z., Cai K.
461	Application of molecular biological tools for monitoring efficiency of trichloroethylene remediation	2019	10.1016/j.chemosphere.2019.05.203	Article	English	11	Wu Y.-J., Liu P.-W.G., Hsu Y.-S., Whang L.-M., Lin T.-F., Hung W.-N., Cho K.-C.
462	Effect of Reservoir Salinity between Bioacid and Carbonate Rock Based on Biometabolic Analysis	2019	10.1021/acs.energyfuels.9b01522	Article	English	1	Zheng X., Lin X., Yan Y., Wen Y., Shi Y., Xie X., Hou A., Lai N.
463	Bacterial Community Composition in Channel Sediment in Response to Mariculture Wastewater Drainage [海水养殖尾水直排对河道沉积物细菌群落的影响]	2019	10.13227/j.hjkx.201903166	Article	Chinese	2	Hu Y.-H., Xuan L.-X., Qiu Q.-F.
464	Distinct responses of planktonic and sedimentary bacterial communities to anthropogenic activities: Case study of a tributary of the Three Gorges Reservoir, China	2019	10.1016/j.scitotenv.2019.05.172	Article	English	16	Mao Y., Liu Y., Li H., He Q., Ai H., Gu W., Yang G.
465	Differential transcriptome analysis of enterohemorrhagic Escherichia coli strains reveals differences in response to plant-derived compounds	2019	10.1186/s12866-019-1578-4	Article	English	2	Bufe T., Hennig A., Klumpp J., Weiss A., Nieselt K., Schmidt H.
466	Composition of bacterial and archaeal communities in an alkali-surfactant-polyacrylamide-flooded oil reservoir and the responses of microcosms to nutrients	2019	10.3389/fmicb.2019.02197	Article	English	11	Gao P., Li Y., Tan L., Guo F., Ma T.
467	Bordetella bronchiseptica diguanylate cyclase bdca regulates motility and is important for the establishment of respiratory infection in mice	2019	10.1128/jb.00011-19	Article	English	4	Belhart K., Gutierrez M.D.L.P., Zacca F., Ambrosis N., Gestal M.C., Taylor D., Dahlstrom K.M., Harvill E.T., O'Toole G.A., Sisti F., FeRNÁndez J.
468	BIOMOSAIC Film: Artificial Biofilms with Catalytic and Self-Sealing Properties	2019	10.1002/admi.201900379	Article	English	2	Park J.P., Do M., Hong S.H., Ryu J., Kang D., Rho K., Ahn J.H., Lee H.
469	Human bile-mediated regulation of salmonella curli fimbriae	2019	10.1128/jb.00055-19	Conference Paper	English	16	González J.F., Tucker L., Fitch J., Wetzel A., White P., Gunn J.S.
470	Bottom-up drivers of global patterns of demersal, forage, and pelagic fishes	2019	10.1016/j.pocean.2019.102124	Article	English	27	Petrik C.M., Stock C.A., Andersen K.H., van Denderen P.D., Watson J.R.
471	Anaerobic hydrocarbon degradation in candidate phylum ‘Atribacteria’ (JS1) inferred from genomics	2019	10.1038/s41396-019-0448-2	Article	English	30	Liu Y.-F., Qi Z.-Z., Shou L.-B., Liu J.-F., Yang S.-Z., Gu J.-D., Mu B.-Z.
472	Effect of the fermentation temperature on the degradation of phytic acid in whole-wheat sourdough bread	2019	10.1016/j.lwt.2019.05.122	Article	English	24	Yildirim R.M., Arici M.
473	High microbial diversity of the nitric oxide dismutation reaction revealed by PCR amplification and analysis of the nod gene	2019	10.1016/j.ibiod.2019.05.025	Article	English	6	Hu Q.-Q., Zhou Z.-C., Liu Y.-F., Zhou L., Mbadinga S.M., Liu J.-F., Yang S.-Z., Gu J.-D., Mu B.-Z.
474	Could benthic biofilm analyses be used as a reliable proxy for freshwater environmental health?	2019	10.1016/j.envpol.2019.05.111	Article	English	16	Pu Y., Ngan W.Y., Yao Y., Habimana O.
475	Biodegradation of crude oil by Chelatococcus daeguensis HB-4 and its potential for microbial enhanced oil recovery (MEOR)in heavy oil reservoirs	2019	10.1016/j.biortech.2019.121442	Article	English	26	Ke C.-Y., Lu G.-M., Wei Y.-L., Sun W.-J., Hui J.-F., Zheng X.-Y., Zhang Q.-Z., Zhang X.-L.
476	Patterns of bacterial and archaeal communities in sediments in response to dam construction and sewage discharge in Lhasa River	2019	10.1016/j.ecoenv.2019.03.107	Article	English	18	Tao K., Liu Y., Ke T., Zhang Y., Xiao L., Li S., Wei S., Chen L., Hu T.
477	Characterization and source-tracking of antibiotic resistomes in the sediments of a peri-urban river	2019	10.1016/j.scitotenv.2019.05.063	Article	English	30	Chen H., Bai X., Li Y., Jing L., Chen R., Teng Y.
478	Evaluating indigenous diversity and its potential for microbial methane generation from thermogenic coal bed methane reservoir	2019	10.1016/j.fuel.2019.03.125	Article	English	15	Rathi R., Lavania M., Singh N., Sarma P.M., Kishore P., Hajra P., Lal B.
479	Floral and Foliar Source Affect the Bee Nest Microbial Community	2019	10.1007/s00248-018-1300-3	Article	English	29	Rothman J.A., Andrikopoulos C., Cox-Foster D., McFrederick Q.S.
480	Taxonomic diversity of antimicrobial-resistant bacteria and genes in the Red Sea coast	2019	10.1016/j.scitotenv.2019.04.283	Article	English	15	Ullah R., Yasir M., Bibi F., Abujamel T.S., Hashem A.M., Sohrab S.S., Al-Ansari A., Al-Sofyani A.A., Al-Ghamdi A.K., Al-sieni A., Azhar E.I.
481	From Antihistamine to Anti-infective: Loratadine Inhibition of Regulatory PASTA Kinases in Staphylococci Reduces Biofilm Formation and Potentiates β-Lactam Antibiotics and Vancomycin in Resistant Strains of Staphylococcus aureus	2019	10.1021/acsinfecdis.9b00096	Article	English	14	Cutrona N., Gillard K., Ulrich R., Seemann M., Miller H.B., Blackledge M.S.
482	Enterocytozoon bieneusi genotypes in cats and dogs in Victoria, Australia	2019	10.1186/s12866-019-1563-y	Article	English	14	Zhang Y., Koehler A.V., Wang T., Cunliffe D., Gasser R.B.
483	Changes in the microbial community diversity of oil exploitation	2019	10.3390/genes10080556	Article	English	10	Liu J., Wu J., Lin J., Zhao J., Xu T., Yang Q., Zhao J., Zhao Z., Song X.
484	The cooling tower water microbiota: Seasonal dynamics and co-occurrence of bacterial and protist phylotypes	2019	10.1016/j.watres.2019.04.028	Article	English	36	Tsao H.-F., Scheikl U., Herbold C., Indra A., Walochnik J., Horn M.
485	The effect of cymbopogon citratus essential oil on community dynamics of biofilm-forming bacteria isolated from brine water of oil reservoir in South Sumatra	2019	10.1088/1755-1315/299/1/012057	Conference Paper	English	1	Purwasena I.A., Aditiawati P., Siwi I.K., Fauziyyah N.A.
486	Draft genome sequence of a fermenting bacterium, soehngenia sp. strain 1933p, isolated from a petroleum reservoir in Azerbaijan	2019	10.1128/mra.00689-19	Article	English	3	Grouzdev D.S., Bidzhieva S.K., Sokolova D.S., Tourova T.P., Poltaraus A.B., Nazina T.N.
487	Draft genome sequence of geotoga petraea strain HO-Geo1, isolated from a petroleum reservoir in Russia	2019	10.1128/mra.00706-19	Article	English	3	Grouzdev D.S., Semenova E.M., Sokolova D.S., Tourova T.P., Poltaraus A.B., Nazina T.N.
488	PET imaging agents targeting macrophage surface receptors [靶向巨噬细胞表面受体的PET显像剂]	2019	10.1360/n972018-01063	Review	Chinese	0	Fu Z., Shi H., Cheng D.
489	A universal discoidal nanoplatform for the intracellular delivery of PNAs	2019	10.1039/c9nr03667a	Article	English	18	Tahmasbi Rad A., Malik S., Yang L., Oberoi-Khanuja T.K., Nieh M.-P., Bahal R.
490	Effects of low-frequency noise and temperature on copepod and amphipod performance	2019	10.1121/2.0001275	Conference Paper	English	0	Tremblay N., Leiva L., Beermann J., Meunier C.L., Boersma M.
491	Characterizing Project Evolution on a Social Coding Platform	2019	10.1109/snpd.2019.8935866	Conference Paper	English	0	Toda K., Tamada H., Nakamura M., Matsumoto K.
492	Energetic macroscopic representation and inversion-based control of a grid-connected MCT power generation system with super-capacitor based energy storage unit in Ushant Island	2019	10.1109/oses.2019.8867324	Conference Paper	English	2	Trabelsi M., Charpentier J.-F., Scuiller F., Franquet C., Nicolas E.
493	A study of working fluids for transcritical pumped thermal energy storage cycles	2019	10.1109/oses.2019.8867217	Conference Paper	English	5	Koen A., Farres Antunez P., White A.
494	Virulence-associated traits and in vitro biofilm-forming ability of Escherichia coli isolated from a major river traversing Northern India	2019	10.1007/s11356-019-05389-3	Article	English	2	Singhal N., Singh N.S., Maurya A.K., Virdi J.S.
495	Oxidized glycerophosphatidylcholines in diabetes through non-targeted metabolomics: Their annotation and biological meaning	2019	10.1016/j.jchromb.2019.04.053	Article	English	10	Godzien J., Kalaska B., Adamska-Patruno E., Siroka J., Ciborowski M., Kretowski A., Barbas C.
496	3D Modeling of Long-Term Dynamic Behavior of Monopile-Supported Offshore Wind Turbine in Clay	2019	10.1061/(asce)gm.1943-5622.0001437	Article	English	7	Bisoi S., Haldar S.
497	Vertical response of microbial community and degrading genes to petroleum hydrocarbon contamination in saline alkaline soil	2019	10.1016/j.jes.2019.02.001	Article	English	36	Liu Q., Tang J., Liu X., Song B., Zhen M., Ashbolt N.J.
498	Microbiomes in Zhansan area, Shengli Oilfield, Shandong Province, China [山东胜利油田沾3油藏微生物组特征]	2019	10.1360/n972019-00135	Article	Chinese	1	Zhang W., Hu X., Qiu X., Liu D., Feng L., Ma L., Hu J., Wang H.
499	Development of a robust correlation to determine an oil production rate through vapor extraction	2019	10.3997/2214-4609.201901650	Conference Paper	English	0	Ahmadi M.A., Chen Z.
500	Using deep reinforcement learning approach for solving the multiple sequence alignment problem	2019	10.1007/s42452-019-0611-4	Article	English	7	Jafari R., Javidi M.M., Kuchaki Rafsanjani M.
501	Pathogenicity and virulence of trueperella pyogenes: A review	2019	10.3390/ijms20112737	Review	English	66	Rzewuska M., Kwiecień E., Chrobak-Chmiel D., Kizerwetter-Świda M., Stefańska I., Gieryńska M.
502	Group K-SVD for the classification of gene expression data	2019	10.1016/j.compeleceng.2019.03.009	Article	English	6	He P., Fan B., Xu X., Ding J., Liang Y., Lou Y., Zhang Z., Chang X.
503	Metagenomics sheds light on the metabolic repertoire of oil-biodegrading microbes of the South Atlantic Ocean	2019	10.1016/j.envpol.2019.03.007	Article	English	13	Appolinario L.R., Tschoeke D., Paixão R.V.S., Venas T., Calegario G., Leomil L., Silva B.S., Thompson C.C., Thompson F.L.
504	Deepwater Horizon crude oil exposure alters cholesterol biosynthesis with implications for developmental cardiotoxicity in larval mahi-mahi (Coryphaena hippurus)	2019	10.1016/j.cbpc.2019.03.001	Article	English	18	McGruer V., Pasparakis C., Grosell M., Stieglitz J.D., Benetti D.D., Greer J.B., Schlenk D.
505	Identification of key genes and molecular mechanisms associated with low egg production of broiler breeder hens in ad libitum	2019	10.1186/s12864-019-5801-3	Article	English	9	Wei Z., Li P., Huang S., Lkhagvagarav P., Zhu M., Liang C., Jia C.
506	Microbial metabolic strategies for overcoming low-oxygen in naturalized freshwater reservoirs surrounding the Athabasca Oil Sands: A proxy for End-Pit Lakes?	2019	10.1016/j.scitotenv.2019.02.032	Article	English	8	Reid T., Droppo I.G., Chaganti S.R., Weisener C.G.
507	Potential biodegradation of phenanthrene by isolated halotolerant bacterial strains from petroleum oil polluted soil in Yellow River Delta	2019	10.1016/j.scitotenv.2019.02.080	Article	English	28	Xu X., Liu W., Wang W., Tian S., Jiang P., Qi Q., Li F., Li H., Wang Q., Li H., Yu H.
508	Genome of a Member of the Candidate Archaeal Phylum Verstraetearchaeota from a Subsurface Thermal Aquifer Revealed Pathways of Methyl-Reducing Methanogenesis and Fermentative Metabolism	2019	10.1134/s0026261719030068	Article	English	1	Kadnikov V.V., Mardanov A.V., Beletsky A.V., Frank Y.A., Karnachuk O.V., Ravin N.V.
509	Symbiont-mediated defense against Legionella pneumophila in amoebae	2019	10.1128/mbio.00333-19	Article	English	26	König L., Wentrup C., Schulz F., Wascher F., Escola S., Swanson M.S., Buchrieser C., Horn M.
510	Genome sequence of aeribacillus pallidus W-12, a thermophilic bacterium containing possible biodesulfurization and biodenitrification pathways	2019	10.1128/mra.01570-18	Article	English	1	Peng C., Zhang B., Wang W.
511	Increased stability in carbon isotope records reflects emerging complexity of the biosphere	2019	10.3389/feart.2019.00087	Article	English	4	Schobben M., van de Schootbrugge B.
512	Selection of a heat-resistant oil recovery bacteria	2019	10.1088/1757-899x/490/6/062019	Conference Paper	English	0	Ma T., Shi X., Yang Y., Xu B.
513	Quorum Sensing Autoinducer(s) and Flagellum Independently Mediate EPS Signaling in Vibrio cholerae Through LuxO-Independent Mechanism	2019	10.1007/s00248-018-1262-5	Article	English	7	Biswas S., Mukherjee P., Manna T., Dutta K., Guchhait K.C., Karmakar A., Karmakar M., Dua P., Panda A.K., Ghosh C.
514	Contaminant Exposure Linked to Cellular and Endocrine Biomarkers in Southern California Bottlenose Dolphins	2019	10.1021/acs.est.8b06487	Article	English	10	Trego M.L., Hoh E., Whitehead A., Kellar N.M., Lauf M., Datuin D.O., Lewison R.L.
515	Modeling, design and test-bench validation of a semi-active propulsive ankle prosthesis with a clutched series elastic actuator	2019	10.1109/lra.2019.2897993	Article	English	18	Convens B., Dong D., Furnemont R., Verstraten T., Cherelle P., Lefeber D., Vanderborght B.
516	Tepidicella baoligensis sp. nov., A Novel Member of Betaproteobacterium Isolated from an Oil Reservoir	2019	10.1007/s00284-018-1604-z	Article	English	3	You J., Li Y., Hong S., Wang J., Yu J., Mu B., Ma X., Xue Y.
517	Petroleum contamination evaluation and bacterial community distribution in a historic oilfield located in loess plateau in China	2019	10.1016/j.apsoil.2018.12.012	Article	English	51	Gao S., Liang J., Teng T., Zhang M.
518	Distinctive microbial communities imply the main mechanism in a MEOR trial in high pour-point reservoir	2019	10.1016/j.petrol.2018.12.032	Article	English	9	Wang X., Li X., Yu L., Li Y., Huang L., Lin W., Li D.
519	Effect of Gas Distribution on Flora Structure and Oil Displacement in MEOR [微生物驱油过程中配气对菌群结构及驱油效果的影响]	2019	10.19346/j.cnki.1000-4092.2019.01.027	Article	Chinese	0	Liu T., Wang L., Hu J., Ba Y., Liu F., Cao Y.
520	Investigation of Asymmetric Dimethylarginine, Adiponectin, Zn, and Cu Levels in Obese Subjects	2019	10.1007/s12668-018-0591-7	Article	English	1	Mehmetoğlu İ., Çelik M., Atalar M.N., Mehmetoğlu Z., Aygün A., Şen F.
521	Biosurfactant-Producing Capability and Prediction of Functional Genes Potentially Beneficial to Microbial Enhanced Oil Recovery in Indigenous Bacterial Communities of an Onshore Oil Reservoir	2019	10.1007/s00284-019-01641-8	Article	English	7	Phetcharat T., Dawkrajai P., Chitov T., Mhuantong W., Champreda V., Bovonsombut S.
522	Isolation and screening of Bacillus subtilis MJ01 for MEOR application: biosurfactant characterization, production optimization and wetting effect on carbonate surfaces	2019	10.1007/s13202-018-0457-0	Article	English	25	Jahanbani Veshareh M., Ganji Azad E., Deihimi T., Niazi A., Ayatollahi S.
523	Occurrence of extended-spectrum β-lactamase-producing bacteria in urban Clinton River habitat	2019	10.1016/j.jgar.2018.10.007	Article	English	9	Muraleedharan C., Talreja D., Kanwar M., Kumar A., Walia S.K.
524	Role of thermophilic bacteria (Bacillus and Geobacillus) on crude oil degradation and biocorrosion in oil reservoir environment	2019	10.1007/s13205-019-1604-0	Article	English	30	Elumalai P., Parthipan P., Narenkumar J., Anandakumar B., Madhavan J., Oh B.-T., Rajasekar A.
525	Evaluation of a microbial consortium for crude oil spill bioremediation and its potential uses in enhanced oil recovery	2019	10.1016/j.bcab.2019.101034	Article	English	11	Bhattacharya M., Guchhait S., Biswas D., Singh R.
526	Distribution of bacterial polycyclic aromatic hydrocarbon (PAH) ring-hydroxylating dioxygenases genes in oilfield soils and mangrove sediments explored by gene-targeted metagenomics	2019	10.1007/s00253-018-09613-x	Article	English	24	Liang C., Huang Y., Wang Y., Ye Q., Zhang Z., Wang H.
527	Methanogenic degradation of branched alkanes in enrichment cultures of production water from a high-temperature petroleum reservoir	2019	10.1007/s00253-018-09574-1	Article	English	14	Chen J., Liu Y.-F., Zhou L., Mbadinga S.M., Yang T., Zhou J., Liu J.-F., Yang S.-Z., Gu J.-D., Mu B.-Z.
528	Virulence, attachment and invasion of Caco-2 cells by multidrug-resistant bacteria isolated from wild animals	2019	10.1016/j.micpath.2019.01.011	Article	English	4	Dias C., Ribeiro M., Correia-Branco A., Domínguez-Perles R., Martel F., Saavedra M.J., Simões M.
529	Poultry as a vector for emerging multidrug resistant Enterococcus spp.: First report of vancomycin (van) and the chloramphenicol–florfenicol (cat-fex-cfr) resistance genes from pigeon and duck faeces	2019	10.1016/j.micpath.2019.01.006	Article	English	25	Osman K.M., Badr J., Orabi A., Elbehiry A., Saad A., Ibrahim M.D.S., Hanafy M.H.
530	Cycling of biogenic elements drives biogeochemical gold cycling	2019	10.1016/j.earscirev.2018.12.010	Review	English	24	Sanyal S.K., Shuster J., Reith F.
531	Characterization of antibiotic resistance genes in the sediments of an urban river revealed by comparative metagenomics analysis	2019	10.1016/j.scitotenv.2018.11.052	Article	English	36	Chen H., Bai X., Jing L., Chen R., Teng Y.
532	Antibiotic resistance genes allied to the pelagic sediment microbiome in the Gulf of Khambhat and Arabian Sea	2019	10.1016/j.scitotenv.2018.10.409	Article	English	15	Nathani N.M., Mootapally C., Dave B.P.
533	Characterizing the microbiome in petroleum reservoir flooded by different water sources	2019	10.1016/j.scitotenv.2018.10.410	Article	English	21	Wang X., Li X., Yu L., Huang L., Xiu J., Lin W., Zhang Y.
534	In vitro Liver Zonation of Primary Rat Hepatocytes	2019	10.3389/fbioe.2019.00017	Article	English	14	Tomlinson L., Hyndman L., Firman J.W., Bentley R., Kyffin J.A., Webb S.D., McGinty S., Sharma P.
535	Effects of dietary lipid sources on hepatic nutritive contents, fatty acid composition and proteome of Nile tilapia (Oreochromis niloticus)	2019	10.1016/j.jprot.2018.09.003	Article	English	17	Boonanuntanasarn S., Nakharuthai C., Schrama D., Duangkaew R., Rodrigues P.M.
536	Succession of indigenous microbe in reservoirs and its effect on displacement efficiency [油藏内源微生物演替规律及其对驱油效果的影响]	2019	10.3969/j.issn.1673-5005.2019.01.013	Article	Chinese	3	Hu J., Shu Q., Sun G., Liu T., Song Y., Cao Y., Wang W.
537	Microbial community from arid desert oilfield in response to accurate bio-stimulation remediation	2019	10.1080/10916466.2018.1547752	Article	English	1	Yu W., Chen H., Song J., Zhao C., Du X., Guo C., Song Q.
538	Arbuscular mycorrhiza under water — Carbon‒phosphorus exchange between rice and arbuscular mycorrhizal fungi under different flooding regimes	2019	10.1016/j.soilbio.2018.11.020	Article	English	27	Bao X., Wang Y., Olsson P.A.
539	Molecular epidemiology and distribution of antimicrobial resistance genes of Staphylococcus species isolated from Chinese dairy cows with clinical mastitis	2019	10.3168/jds.2018-15136	Article	English	27	Qu Y., Zhao H., Nobrega D.B., Cobo E.R., Han B., Zhao Z., Li S., Li M., Barkema H.W., Gao J.
540	Plastics in the marine environment are reservoirs for antibiotic and metal resistance genes	2019	10.1016/j.envint.2018.11.061	Article	English	195	Yang Y., Liu G., Song W., Ye C., Lin H., Li Z., Liu W.
541	Diversity analysis of microbial communities and biodegradation performance of two halotolerant and thermotolerant Bacillus licheniformis strains in oilfield-produced wastewater	2019	10.1016/j.ibiod.2018.11.004	Article	English	3	Huang X., Wang J., Ma C., Ma L., Qiao C.
542	Genomic characterization of carbapenem-resistant Shewanella algae isolated from Asian hard clam (Meretrix lusoria)	2019	10.1016/j.aquaculture.2018.10.028	Article	English	8	Lee Y.-H., Tung K.-C., Cheng J.-F., Wu Z.-Y., Chen S.-Y., Hong Y.-K., Huang Y.-T., Liu P.-Y.
543	Creating a Multitrack Classical Music Performance Dataset for Multimodal Music Analysis: Challenges, Insights, and Applications	2019	10.1109/tmm.2018.2856090	Article	English	44	Li B., Liu X., Dinesh K., Duan Z., Sharma G.
544	Stenotrophomonas maltophilia strain 5DMD: an efficient biosurfactant-producing bacterium for biodegradation of diesel oil and used engine oil	2019	10.1007/s13762-018-1666-2	Article	English	21	Larik I.A., Qazi M.A., Phulpoto A.H., Haleem A., Ahmed S., Kanhar N.A.
545	Inference of thermal preference profiles for personalized thermal environments with actual building occupants	2019	10.1016/j.buildenv.2018.10.027	Article	English	42	Lee S., Karava P., Tzempelikos A., Bilionis I.
546	Influence of physico-chemical characteristics of sediment on the in situ spatial distribution of F-specific RNA phages in the riverbed	2019	10.1093/femsec/fiy240	Article	English	7	Fauvel B., Cauchie H.-M., Gantzer C., Ogorzaly L.
547	Extraction and Analysis of DNA from Phytoplankton Samples Acquired Offshore the Outer Banks of North Carolina (2016-2018)	2019	10.1109/oceans.2018.8604507	Conference Paper	English	0	Savona M.T., Morrison H.G.
548	Comprehensive evaluation of fuel properties and complex regulation of intracellular transporters for high oil production in developing seeds of Prunus sibirica for woody biodiesel 06 Biological Sciences 0607 Plant Biology	2019	10.1186/s13068-018-1347-x	Article	English	3	Wang J., Lin W., Yin Z., Wang L., Dong S., An J., Lin Z., Yu H., Shi L., Lin S., Chen S.
549	Taxonomical Diversity of Extremophiles in the Deep Biosphere	2019	10.1016/b978-0-12-814849-5.00035-6	Book Chapter	English	1	Govil T., Rathinam N.K., Salem D.R., Sani R.K.
550	Nanomaterials in Microbial Fuel Cells and Related Applications	2019	10.1007/978-3-030-16383-9_13	Book Chapter	English	0	Thirugnanasambandan T.
551	DETERMINATION OF OPTIMAL CONDITIONS FOR THE PRODUCTION OF SINGLE CELL PROTEIN (SCP) BY PSEUDOMONAS AERUGINOSA BACTERIA USING HYDROCARBON RESIDUES (USED MOTOR OIL)	2019	10.35124/bca.2019.19.2.4323	Article	English	0	Aasi Al-Mehmdi M.D., Al-Rawi D.F.A.-Q.
552	Application of a new approach for modeling the oil field formation damage due to mineral scaling	2019	10.2516/ogst/2019032	Article	English	10	Rostami A., Shokrollahi A., Shahbazi K., Ghazanfari M.H.
553	Effect of nacelle drag on the performance of a floating wind turbine platform	2019	10.1115/iowtc2019-7595	Conference Paper	English	0	Son D., Louazel P., Yu B.
554	Metagenomic data mining in oil spill studies	2019	10.1016/b978-0-444-64046-8.00480-8	Book Chapter	English	3	Tremblay J., Greer C.W.
555	A comprehensive microbial assessment of hydraulic fracturing stimulations using state-of-the-art molecular methods: Three western-Canadian case studies	2019	10.2118/195995-ms	Conference Paper	English	1	Demeter M., Wornstaff V., Wiggins C., Maley D.
556	Virulence Factors of Clostridioides (Clostridium) difficile Linked to Recurrent Infections	2019	10.1155/2019/7127850	Review	English	7	Tijerina-Rodríguez L., Villarreal-Treviño L., Morfín-Otero R., Camacho-Ortíz A., Garza-González E.
557	Evaluation of cytotoxic potential of structurally well-characterized RNA targeted ionic non-steroidal anti-inflammatory (NSAID) Cu(ii) & Zn(ii) DACH-mefenamato drug conjugates against human cancer cell lines	2019	10.1039/c9ra07464c	Article	English	20	Khan H.Y., Tabassum S., Arjmand F.
558	Description of biomaibacter acetigenes gen. Nov., sp. Nov., and proposal of thermosediminibacterales ord. nov. containing two novel families of tepidanaerobacteraceae fam. Nov. And thermosediminibacteraceae fam. Nov.	2019	10.1099/ijsem.0.003701	Article	English	2	Zhang X., Tu B., Lv X.-M., Lawson P.A., Yang M., Dai L.-R., Zhang H., Tang Y.-Q., Deng Y., Cheng L.
559	Validation of the motion analysis method of floating offshore wind turbines using observation data acquired by full scale demonstration project	2019	10.1115/omae2019-95828	Conference Paper	English	2	Yoshimoto H., Kamizawa K.
560	The increase in wave wake characteristics of marine vessels when accelerating	2019	10.1115/omae2019-95337	Conference Paper	English	0	Macfarlane G., Graham-Parker K., Connellan M.
561	Interleukin-4 Promotes Myogenesis and Boosts Myocyte Insulin Efficacy	2019	10.1155/2019/4182015	Article	English	12	Chang Y.-H., Tsai J.-N., Chen T.-L., Ho K.-T., Cheng H.-Y., Hsiao C.-W., Shiau M.-Y.
562	Low-Abundance Dietzia Inhabiting a Water-Flooding Oil Reservoir and the Application Potential for Oil Recovery	2019	10.1155/2019/2193453	Article	English	3	Gao P., Wang H., Li G., Ma T.
563	Evaluation of extracellular polymeric substances extracted from waste activated sludge as a renewable corrosion inhibitor	2019	10.7717/peerj.7193	Article	English	10	Go L.C., Holmes W., Depan D., Hernandez R.
564	Study of heat and mass transfer in the eyring-powell model of fluid propagating peristaltically through a rectangular compliant channel	2019	10.1615/heattransres.2019025622	Article	English	109	Riaz A., Ellahi R., Bhatti M.M., Marin M.
565	Geobacillus proteiniphilus sp. Nov., a thermophilic bacterium isolated from a high-temperature heavy oil reservoir in China	2019	10.1099/ijsem.0.003486	Article	English	7	Semenova E.M., Sokolova D.S., Grouzdev D.S., Poltaraus A.B., Vinokurova N.G., Tourova T.P., Nazina T.N.
566	Anaerobic degradation of non-methane alkanes by “candidatus methanoliparia” in hydrocarbon seeps of the gulf of Mexico	2019	10.1128/mbio.01814-19	Article	English	36	Laso-Pérez R., Hahn C., Van Vliet D.M., Tegetmeyer H.E., Schubotz F., Smit N.T., Pape T., Sahling H., Bohrmann G., Boetius A., Knittel K., Wegenera G.
567	Detection and expression analysis of tet(B) in Streptococcus oralis	2019	10.1080/20002297.2019.1643204	Article	English	8	Arredondo A., Àlvarez G., Nart J., Mor C., Blanc V., León R.
568	Microbial communities in a flow-through fish farm for lumpfish (Cyclopterus lumpus L.) during healthy rearing conditions	2019	10.3389/fmicb.2019.01594	Article	English	15	Roalkvam I., Drønen K., Dahle H., Wergeland H.I.
569	Pathoadaptive alteration of Salmonella biofilm formation in response to the gallbladder environment	2019	10.1128/jb.00774-18	Conference Paper	English	13	Neiger M.R., González J.F., Gonzalez-Escobedo G., Kuck H., White P., Gunn J.S.
570	The mutual influence between corrosion and the surrounding soil microbial communities of buried petroleum pipelines	2019	10.1039/c9ra03386f	Article	English	14	Su H., Mi S., Peng X., Han Y.
571	Driving down cost: A case study of floating substructure for a 10MW wind turbine	2019	10.4043/29344-ms	Conference Paper	English	2	Udoh I.E., Zou J.
572	Conductive iron oxides promote methanogenic acetate degradation by microbial communities in a high-temperature petroleum reservoir	2019	10.1264/jsme2.me18140	Article	English	10	Kato S., Wada K., Kitagawa W., Mayumi D., Ikarashi M., Sone T., Asano K., Kamagata Y.
573	Turning an offshore analog field into digital using artificial intelligence	2019	10.2118/195027-ms	Conference Paper	English	1	Espinoza R., Thatcher J., Eldred M.
574	A novel microbially induced self-healing cement/concrete for underwater concrete offshore structures	2019	10.2118/194173-ms	Conference Paper	English	2	Noshi C.I., Schubert J.J.
575	Capacity to adhere to and invade human epithelial cells, as related to the presence of virulence genes in, motility of, and biofilm formation of campylobacter jejuni strains isolated from chicken and cattle	2019	10.1139/cjm-2018-0503	Article	English	5	Farfán M., Lártiga N., Benavides M.B., Alegría-Morán R., Sáenz L., Salcedo C., Lapierre L.
576	Drivers of mers-cov emergence in Qatar	2019	10.3390/v11010022	Review	English	12	Farag E., Sikkema R.S., Vinks T., Mazharul Islam M., Nour M., Al-Romaihi H., Al Thani M., Atta M., Alhajri F.H., Al-Marri S., Alhajri M., Reusken C., Koopmans M.
577	Mechanism study of cyfluthrin biodegradation by Photobacterium ganghwense with comparative metabolomics	2019	10.1007/s00253-018-9458-7	Article	English	16	Wang T., Hu C., Zhang R., Sun A., Li D., Shi X.
578	Superactive β-galactosidase inclusion bodies	2019	10.1016/j.colsurfb.2018.10.049	Article	English	9	Flores S.S., Nolan V., Perillo M.A., Sánchez J.M.
579	Simulation of in situ oil reservoir conditions in a laboratory bioreactor testing for methanogenic conversion of crude oil and analysis of the microbial community	2019	10.1016/j.ibiod.2018.10.007	Article	English	9	Xu D., Zhang K., Li B.-G., Mbadinga S.M., Zhou L., Liu J.-F., Yang S.-Z., Gu J.-D., Mu B.-Z.
580	Microbial community structure in deep natural gas-bearing aquifers subjected to sulfate-containing fluid injection	2019	10.1016/j.jbiosc.2018.06.013	Article	English	1	Katayama T., Yoshioka H., Yamanaka T., Takeuchi M., Muramoto Y., Usami J., Ikeda H., Sakata S.
581	Improving prediction of glycaemia course after different meals—New individualized approach	2019	10.1007/978-981-10-9023-3_137	Conference Paper	English	0	Lhotska L., Stechova K., Hlúbik J.
582	Study on anaerobic growth metabolism of a Bacillus licheniformis strain [一株采油用地衣芽孢杆菌厌氧生长代谢]	2018	10.3969/j.issn.1673-5005.2018.06.021	Article	Chinese	1	Li Z., Lin J., Qian Q., Feng Y., Wang L., Wang W., Li X.
583	Inhibiting bacterial drug efflux pumps via phyto-therapeutics to combat threatening antimicrobial resistance	2018	10.3389/fmicb.2018.02990	Article	English	73	Shriram V., Khare T., Bhagwat R., Shukla R., Kumar V.
584	Optimized Continuous Application of Hyperpolarized Xenon to Liquids	2018	10.1021/acs.jpca.8b09479	Article	English	1	Niederländer B., Blümler P., Brotin T., Van Dusschoten D., Offenhäusser A., Krause H.-J., Heil W.
585	Antifungal and anti-biofilm activity of the first cryptic antimicrobial peptide from an archaeal protein against Candida spp. clinical isolates	2018	10.1038/s41598-018-35530-0	Article	English	42	Roscetto E., Contursi P., Vollaro A., Fusco S., Notomista E., Catania M.R.
586	Characterization of virulence properties and multi-drug resistance profiles in motile Aeromonas spp. isolated from zebrafish (Danio rerio)	2018	10.1111/lam.13075	Article	English	19	Hossain S., De Silva B.C.J., Dahanayake P.S., Heo G.-J.
587	Rhamnolipids from Pseudomonas aeruginosa disperse the biofilms of sulfate-reducing bacteria	2018	10.1038/s41522-018-0066-1	Article	English	38	Wood T.L., Gong T., Zhu L., Miller J., Miller D.S., Yin B., Wood T.K.
588	Coralloluteibacterium thermophilus sp. nov., A Gammaproteobacterium Isolated from an Oil Reservoir	2018	10.1007/s00284-018-1564-3	Article	English	1	You J., Hong S., Yu J., Duan L., Liu B., Mu B., Zhou C., Xue Y.
589	Dew point pressure prediction based on mixed-kernels-function support vector machine in gas-condensate reservoir	2018	10.1016/j.fuel.2018.05.168	Article	English	25	Zhong Z., Liu S., Kazemi M., Carr T.R.
590	Bioprospecting for microbes with potential hydrocarbon remediation activity on the northwest coast of the Yucatan Peninsula, Mexico, using DNA sequencing	2018	10.1016/j.scitotenv.2018.06.097	Review	English	16	Reyes-Sosa M.B., Apodaca-Hernández J.E., Arena-Ortiz M.L.
591	Stimulation of methanogenic crude oil biodegradation in depleted oil reservoirs	2018	10.1016/j.fuel.2018.06.018	Article	English	16	Vilcáez J., York J., Youssef N., Elshahed M.
592	Draft genome sequence and detailed characterization of biofuel production by oleaginous microalga Scenedesmus quadricauda LWG002611 06 Biological Sciences 0604 Genetics	2018	10.1186/s13068-018-1308-4	Article	English	14	Nag Dasgupta C., Nayaka S., Toppo K., Singh A.K., Deshpande U., Mohapatra A.
593	Effect of inorganic nutrients on bacterial community composition in oil-bearing sandstones from the subsurface strata of an onshore oil reservoir and its potential use in Microbial Enhanced Oil Recovery	2018	10.1371/journal.pone.0198050	Article	English	9	Phetcharat T., Dawkrajai P., Chitov T., Wongpornchai P., Saenton S., Mhuantong W., Kanokratana P., Champreda V., Bovonsombut S.
594	Effect of pyrolysis on the removal of antibiotic resistance genes and class I integrons from municipal wastewater biosolids	2018	10.1039/c8ew00141c	Article	English	27	Kimbell L.K., Kappell A.D., McNamara P.J.
595	Investigating the performance of an anaerobic baffled bioreactor for the biodegradation of alkaline-surfactant-polymer in oilfield water	2018	10.1080/09593330.2017.1364304	Article	English	5	Liu C., Zhang R., Yang H., Zhang J., Wang H., Chang L., Zhan Y., Xu Q.
596	A Thermotolerant and Halotolerant Sulfate-reducing Bacterium in Produced Water from an Offshore High-temperature Oilfield in Bohai Bay, China: Isolation, Phenotypic Characterization, and Inhibition [海域高温油田1株耐高温耐盐硫酸盐还原菌的筛选与生理特性及活性抑制]	2018	10.13227/j.hjkx.201802103	Article	Chinese	1	Yang C.-L., Yuan M.-Y., Shi R.-J., Yan P.-J., Zhao F., Han S.-Q., Zhang Y.
597	Mitigating sulfidogenesis with simultaneous perchlorate and nitrate treatments	2018	10.3389/fmicb.2018.02305	Article	English	3	Engelbrektson A., Briseno V., Liu Y., Figueroa I., Yee M., Li Shao G., Carlson H., Coates J.D.
598	Features of Network Navigation Systems Construction for Surface Consumers Using Offshore Reference Points	2018	10.1134/s2075108718040144	Article	English	0	Aleshkin A.P., Arkhipova I.G., Myslivtsev T.O., Nikiforov S.V., Polienko V.N., Semenov A.A.
599	Petroclostridium xylanilyticum gen. Nov., sp. nov., a xylan-degrading bacterium isolated from an oilfield, and reclassification of clostridial cluster iii members into four novel genera in a new hungateiclostridiaceae fam. nov.	2018	10.1099/ijsem.0.002966	Article	English	55	Zhang X., Tu B., Dai L.-R., Lawson P.A., Zheng Z.-Z., Liu L.-Y., Deng Y., Zhang H., Cheng L.
600	Transcriptome analysis of Porphyromonas gingivalis and Acinetobacter baumannii in polymicrobial communities	2018	10.1111/omi.12238	Article	English	15	Miller D.P., Wang Q., Weinberg A., Lamont R.J.
601	Erucic acid, a component of Lorenzo's oil and PPAR-δ ligand modifies C6 glioma growth and toxicity of doxorubicin. Experimental data and a comprehensive literature analysis	2018	10.1016/j.cbi.2018.08.024	Article	English	11	Altinoz M.A., Bilir A., Elmaci İ.
602	Thermodynamic structure of supercritical LOX–GH2 diffusion flames	2018	10.1016/j.combustflame.2018.06.016	Article	English	20	Banuti D.T., Ma P.C., Hickey J.-P., Ihme M.
603	New empirical correlations for determination of Minimum Miscibility Pressure (MMP) during N2-contaminated lean gas flooding	2018	10.1016/j.jtice.2018.05.048	Article	English	22	Rostami A., Kamari A., Panacharoensawad E., Hashemi A.
604	Biochemical Enhancement of Geotechnical Properties of Marginal Soils	2018	10.1051/matecconf/201820303010	Conference Paper	English	0	Mohammed M.H., Abdulfatah A.Y.
605	Thermo-economic analysis and multi-objective optimization of a novel waste heat recovery system with a transcritical CO2 cycle for offshore gas turbine application	2018	10.1016/j.enconman.2018.07.019	Article	English	57	Zhang Q., Ogren R.M., Kong S.-C.
606	Se-enriched G. frondosa polysaccharide protects against immunosuppression in cyclophosphamide-induced mice via MAPKs signal transduction pathway	2018	10.1016/j.carbpol.2018.05.046	Article	English	58	Li Q., Chen G., Chen H., Zhang W., Ding Y., Yu P., Zhao T., Mao G., Feng W., Yang L., Wu X.
607	Stimulation of Reservoir Indigenous Microorganisms with Different Nutrients in the Oil Reservoir near Injection Wells [不同营养刺激下油藏注水井近井地带内源微生物激活规律]	2018	10.3799/dqkx.2018.561	Article	Chinese	1	Li Y., Chen Y., Liu M., Jing H., Zhi B., Li G., Ma T.
608	Novel Bacillus cereus strain from electrokinetically remediated saline soil towards the remediation of crude oil	2018	10.1007/s11356-018-2495-z	Article	English	4	Gao Y.-C., Guo S.-H., Wang J.-N., Zhang W., Chen G.-H., Wang H., Du J., Liu Y., Naidu R.
609	Novel magnetic nanoparticle-containing adhesive with greater dentin bond strength and antibacterial and remineralizing capabilities	2018	10.1016/j.dental.2018.06.001	Article	English	26	Li Y., Hu X., Xia Y., Ji Y., Ruan J., Weir M.D., Lin X., Nie Z., Gu N., Masri R., Chang X., Xu H.H.K.
610	Origin of quartz in the lower Cambrian Niutitang Formation in south Hubei Province, upper Yangtze platform	2018	10.1016/j.marpetgeo.2018.06.005	Article	English	35	Niu X., Yan D., Zhuang X., Liu Z., Li B., Wei X., Xu H., Li D.
611	Rapidly Growing Mycobacterial Infections of the Skin and Soft Tissues Caused by M. fortuitum and M. chelonae	2018	10.1007/s40475-018-0150-x	Review	English	4	Gonzalez-Diaz E., Morfin-Otero R., Perez-Gomez H.R., Esparza-Ahumada S., Rodriguez-Noriega E.
612	Plastic optical fiber immunosensor for fast detection of sulfate-reducing bacteria	2018	10.1016/j.measurement.2018.04.088	Article	English	15	Lopes R.N., Rodrigues D.M.C., Allil R.C.S.B., Werneck M.M.
613	A GFP-fusion coupling FACS platform for advancing the metabolic engineering of filamentous fungi	2018	10.1186/s13068-018-1223-8	Article	English	13	Wang G., Jia W., Chen N., Zhang K., Wang L., Lv P., He R., Wang M., Zhang D.
614	Genetic and functional diversity of bacterial microbiome in soils with long term impacts of petroleum hydrocarbons	2018	10.3389/fmicb.2018.01923	Article	English	50	Galazka A., Grzadziel J., Galazka R., Ukalska-Jaruga A., Strzelecka J., Smreczak B.
615	Helicobacter pylori: A foodborne pathogen?	2018	10.3748/wjg.v24.i31.3472	Review	English	44	Quaglia N.C., Dambrosio A.
616	Synthesis and characterization of polyglycerol coated superparamagnetic iron oxide nanoparticles and cytotoxicity evaluation on normal human cell lines	2018	10.1016/j.colsurfa.2018.05.003	Article	English	12	Ghasemi A., Jafari S., saeidi J., mohtashami M., Salehi I.
617	Effects of Organic Pollutants on the Bacterioplankton Community in Hangzhou Bay [有机污染物对杭州湾海域浮游细菌群落的影响]	2018	10.13227/j.hjkx.201712186	Article	Chinese	2	Xuan L.-X., Dai W.-F., Yu W.-N., Zhou S.-M., Ou C.-R., Xiong J.-B.
618	Single-Phase, Antibacterial Trimagnesium Phosphate Hydrate Coatings on Polyetheretherketone (PEEK) Implants by Rapid Microwave Irradiation Technique	2018	10.1021/acsbiomaterials.8b00594	Article	English	38	Sikder P., Grice C.R., Lin B., Goel V.K., Bhaduri S.B.
619	Comparison of Angiogenic Activities of Three Neuropeptides, Substance P, Secretoneurin, and Neuropeptide Y Using Myocardial Infarction	2018	10.1007/s13770-018-0134-x	Article	English	9	Lee J., Song M., Kim J., Park Y.
620	Toxicological and chemical studies of wastewater from hydraulic fracture and conventional shale gas wells	2018	10.1002/etc.4146	Article	English	6	Crosby L.M., Tatu C.A., Varonka M., Charles K.M., Orem W.H.
621	Response to metals treatment of Fra1, a member of the AP-1 transcription factor family, in P. lividus sea urchin embryos	2018	10.1016/j.marenvres.2018.05.003	Article	English	9	Russo R., Bonaventura R., Chiaramonte M., Costa C., Matranga V., Zito F.
622	Characterization of Swedish Campylobacter coli clade 2 and clade 3 water isolates	2018	10.1002/mbo3.583	Article	English	8	Nilsson A., Skarp A., Johansson C., Kaden R., Engstrand L., Rautelin H.
623	Terminal Deoxynucleotidyl Transferase and T7 Exonuclease-Aided Amplification Strategy for Ultrasensitive Detection of Uracil-DNA Glycosylase	2018	10.1021/acs.analchem.8b01928	Article	English	63	Du Y.-C., Cui Y.-X., Li X.-Y., Sun G.-Y., Zhang Y.-P., Tang A.-N., Kim K., Kong D.-M.
624	Microbial Community Distributions in Soils of an Oil Exploitation Site [采油井场土壤微生物群落结构分布]	2018	10.13227/j.hjkx.201711233	Article	Chinese	7	Cai P.-P., Ning Z., He Z., Zhang M., Shi J.-S.
625	Gene Selection for Cancer Classification from Microarray Data Using Data Overlap Measure	2018	10.1109/icbme.2018.8703565	Conference Paper	English	1	Sarbazi-Azad S., Abadeh M.S.
626	Suspended materials in river waters differentially enrich class 1 integron- and IncP-1 plasmid-carrying bacteria in sediments	2018	10.3389/fmicb.2018.01443	Article	English	12	Barrón M.C., Merlin C., Guilloteau H., Montargès-Pelletier E., Bellanger X.
627	Candida albicans dispersed cells are developmentally distinct from biofilm and planktonic cells	2018	10.1128/mbio.01338-18	Article	English	43	Uppuluri P., Acosta Zaldívar M., Anderson M.Z., Dunn M.J., Berman J., Lopez Ribot J.L., Köhler J.R.
628	Microbial community analyses of produced waters from high-temperature oil reservoirs reveal unexpected similarity between geographically distant oil reservoirs	2018	10.1111/1751-7915.13281	Article	English	22	Kim D.D., O'Farrell C., Toth C.R.A., Montoya O., Gieg L.M., Kwon T.-H., Yoon S.
629	Impact of particulate sediment, bentonite and barite (oil-drilling waste) on net fluxes of oxygen and nitrogen in Arctic-boreal sponges	2018	10.1016/j.envpol.2017.11.092	Article	English	13	Fang J.K.H., Rooks C.A., Krogness C.M., Kutti T., Hoffmann F., Bannister R.J.
630	The abundance and diversity of antibiotic resistance genes in the atmospheric environment of composting plants	2018	10.1016/j.envint.2018.04.028	Article	English	71	Gao M., Qiu T., Sun Y., Wang X.
631	Functional genetic diversity and culturability of petroleum-degrading bacteria isolated from oil-contaminated soils	2018	10.3389/fmicb.2018.01332	Article	English	18	Sun J.-Q., Xu L., Liu X.-Y., Zhao G.-F., Cai H., Nie Y., Wu X.-L.
632	Receptor-Targeted Drug Delivery and the (Many) Problems We Know of: The Case of CD44 and Hyaluronic Acid	2018	10.1002/adbi.201800049	Review	English	11	Rios de la Rosa J.M., Tirella A., Tirelli N.
633	Microbial communities of polluted sub-surface marine sediments	2018	10.1016/j.marpolbul.2018.04.015	Article	English	30	Catania V., Cappello S., Di Giorgi V., Santisi S., Di Maria R., Mazzola A., Vizzini S., Quatrini P.
634	Anaerobic biodegradation of partially hydrolyzed polyacrylamide in long-term methanogenic enrichment cultures from production water of oil reservoirs	2018	10.1007/s10532-018-9825-1	Article	English	18	Hu H., Liu J.-F., Li C.-Y., Yang S.-Z., Gu J.-D., Mu B.-Z.
635	Three-dimensional graphene nanosheet doped with gold nanoparticles as electrochemical DNA biosensor for bacterial detection	2018	10.1016/j.snb.2018.02.093	Article	English	22	Chen S., Frank Cheng Y., Voordouw G.
636	Upregulation of P2Y 2 R, active uPA, and PAI-1 are essential components of hantavirus cardiopulmonary syndrome	2018	10.3389/fcimb.2018.00169	Article	English	12	Bondu V., Bitting C., Poland V.L., Hanson J.A., Harkins M.S., Lathrop S., Nolte K.B., Lawrence D.A., Buranda T.
637	An efficient nonnegative matrix factorization model for finding cancer associated genes by integrating data from genome, transcriptome and interactome	2018	10.1109/ciss.2018.8362246	Conference Paper	English	2	Xi J., Li A., Wang M.
638	Synergy of sodium nitroprusside and nitrate in inhibiting the activity of sulfate reducing bacteria in oil-containing bioreactors	2018	10.3389/fmicb.2018.00981	Article	English	7	Fida T.T., Voordouw J., Ataeian M., Kleiner M., Okpala G., Mand J., Voordouw G.
639	Inoculation with bacteria in floating treatment wetlands positively modulates the phytoremediation of oil field wastewater	2018	10.1016/j.jhazmat.2018.02.013	Article	English	119	Rehman K., Imran A., Amin I., Afzal M.
640	Biosurfactant production by Mucor circinelloides: Environmental applications and surface-active properties	2018	10.1002/elsc.201700149	Article	English	8	Hasani zadeh P., Moghimi H., Hamedi J.
641	Thermally enhanced in situ bioremediation of groundwater contaminated with chlorinated solvents – A field test	2018	10.1016/j.scitotenv.2017.12.047	Article	English	35	Němeček J., Steinová J., Špánek R., Pluhař T., Pokorný P., Najmanová P., Knytl V., Černík M.
642	Different diversity and distribution of archaeal community in the aqueous and oil phases of production fluid from high-temperature petroleum reservoirs	2018	10.3389/fmicb.2018.00841	Article	English	17	Liang B., Zhang K., Wang L.-Y., Liu J.-F., Yang S.-Z., Gu J.-D., Mu B.-Z.
643	Study on paraffin wax degrading ability of Pseudomonas nitroreducens isolated from oil wells of Gujarat, India	2018	10.1080/10916466.2018.1437634	Article	English	6	Patel D.D., Bhaskaran L.
644	Modulation of microbial consortia enriched from different polluted environments during petroleum biodegradation	2018	10.1007/s10532-018-9823-3	Article	English	27	Omrani R., Spini G., Puglisi E., Saidane D.
645	Potential of biogenic methane for pilot-scale fermentation ex situ with lump anthracite and the changes of methanogenic consortia	2018	10.1007/s10295-018-2023-7	Article	English	12	Yang X., Chen Y., Wu R., Nie Z., Han Z., Tan K., Chen L.
646	Heart rate variability analysis using neural network models for automatic detection of lifestyle activities	2018	10.1016/j.bspc.2018.01.016	Article	English	14	Matta S.C., Sankari Z., Rihana S.
647	Extracellular polymeric substances affect the responses of multi-species biofilms in the presence of sulfamethizole	2018	10.1016/j.envpol.2017.12.060	Article	English	41	Wang L., Li Y., Wang L., Zhang H., Zhu M., Zhang P., Zhu X.
648	Liquid Crystalline Nanostructures as PEGylated Reservoirs of Omega-3 Polyunsaturated Fatty Acids: Structural Insights toward Delivery Formulations against Neurodegenerative Disorders	2018	10.1021/acsomega.7b01935	Article	English	50	Angelova A., Drechsler M., Garamus V.M., Angelov B.
649	A mobile electrochemical (bio-)sensor node for a vascular graft bioreactor	2018	10.1109/biocas.2017.8325056	Conference Paper	English	2	Leibold C., Stanislawski N., Blume C., Blume H.
650	Developmental Toxicity of the Organic Fraction from Hydraulic Fracturing Flowback and Produced Waters to Early Life Stages of Zebrafish (Danio rerio)	2018	10.1021/acs.est.7b06557	Article	English	56	He Y., Sun C., Zhang Y., Folkerts E.J., Martin J.W., Goss G.G.
651	Factors involved in the persistence of a shiga toxin-producing Escherichia coli O157: H7 strain in bovine feces and gastro-intestinal content	2018	10.3389/fmicb.2018.00375	Article	English	15	Segura A., Auffret P., Bibbal D., Bertoni M., Durand A., Jubelin G., Kérourédan M., Brugère H., Bertin Y., Forano E.
652	Seed-specific expression of AtLEC1 increased oil content and altered fatty acid composition in seeds of peanut (Arachis hypogaea L.)	2018	10.3389/fpls.2018.00260	Article	English	24	Tang G., Xu P., Ma W., Wang F., Liu Z., Wan S., Shan L.
653	Antecedents of soft drusen, the specific deposits of age-related macular degeneration, in the biology of human macula	2018	10.1167/iovs.18-24883	Article	English	66	Curcio C.A.
654	Diagenesis of microbialites in the lower Cambrian Qingxudong Formation, South China: Implications for the origin of porosity in deep microbial carbonates	2018	10.1016/j.jngse.2017.12.031	Article	English	3	Tan Q., Shi Z., Hu X., Wang Y., Tian Y., Wang C.
655	Increased soil methane emissions and methanogenesis in oil contaminated areas	2018	10.1002/ldr.2886	Article	English	10	Yang J., Li G., Qian Y., Zhang F.
656	Damage to offshore production facilities by corrosive microbial biofilms	2018	10.1007/s00253-018-8808-9	Review	English	48	Vigneron A., Head I.M., Tsesmetzis N.
657	The effects of platelet lysate patches on the activity of tendon-derived cells	2018	10.1016/j.actbio.2018.01.006	Article	English	20	Costa-Almeida R., Franco A.R., Pesqueira T., Oliveira M.B., Babo P.S., Leonor I.B., Mano J.F., Reis R.L., Gomes M.E.
658	Gene structure, expression pattern and interaction of Nuclear Factor-Y family in castor bean (Ricinus communis)	2018	10.1007/s00425-017-2809-2	Article	English	28	Wang Y., Xu W., Chen Z., Han B., Haque M.E., Liu A.
659	Antibacterial effects of Lactococcus lactis isolated from Lighvan cheese regarding the recognition of Nisin, Lacticin and Lactococcin structural genes	2018	10.1016/j.lwt.2017.10.044	Article	English	4	Attar M.A., Yavarmanesh M., Mortazavi A., Edalatian Dovom M.R., Habibi Najafi M.B.
660	Characterization of bacterial composition and diversity in a long-term petroleum contaminated soil and isolation of high-efficiency alkane-degrading strains using an improved medium	2018	10.1007/s11274-018-2417-8	Article	English	33	Zheng J., Feng J.-Q., Zhou L., Mbadinga S.M., Gu J.-D., Mu B.-Z.
661	Complex Intratissue Microbiota Forms Biofilms in Periodontal Lesions	2018	10.1177/0022034517732754	Article	English	24	Baek K., Ji S., Choi Y.
662	Lipid acquisition and retention in tissues of spawning adult paddlefish Polyodon spathula (Walbaum, 1792) in relation to extended and compressed life history patterns in two river-reservoir systems	2018	10.1111/jai.13580	Article	English	2	Hemingway R.J., Scarnecchia D.L.
663	Succession of microbial communities and changes of incremental oil in a post-polymer flooded reservoir with nutrient stimulation	2018	10.1007/s00253-018-8766-2	Article	English	14	Gao P., Li G., Le J., Liu X., Liu F., Ma T.
664	The frequently occurring components of essential oils beta elemene and R-limonene alter expression of dprE1 and clgR genes of Mycobacterium tuberculosis H37Ra	2018	10.1016/j.fct.2017.12.052	Article	English	9	Sawicki R., Sieniawska E., Swatko-Ossor M., Golus J., Ginalska G.
665	Cyclic lipopeptide signature as fingerprinting for the screening of halotolerant Bacillus strains towards microbial enhanced oil recovery	2018	10.1007/s00253-017-8675-9	Article	English	9	Farias B.C.S., Hissa D.C., do Nascimento C.T.M., Oliveira S.A., Zampieri D., Eberlin M.N., Migueleti D.L.S., Martins L.F., Sousa M.P., Moyses D.N., Melo V.M.M.
666	A cross-taxa study using environmental DNA/RNA metabarcoding to measure biological impacts of offshore oil and gas drilling and production operations	2018	10.1016/j.marpolbul.2017.11.042	Article	English	58	Laroche O., Wood S.A., Tremblay L.A., Ellis J.I., Lear G., Pochon X.
667	Isolation and Characterization of Oil-Degrading Bacteria from One of South Sumatera's Oilfield	2018	10.1088/1757-899x/288/1/012123	Conference Paper	English	2	Purwasena I.A., Astuti D.I., Fatmawati R., Afinanisa Q.
668	MGB-3 but system: Low-resource ASR on Egyptian YouTube data	2018	10.1109/asru.2017.8268959	Conference Paper	English	0	Vesely K., Murali B.K., Diez M., Benes K.
669	Speech recognition challenge in the wild: Arabic MGB-3	2018	10.1109/asru.2017.8268952	Conference Paper	English	43	Ali A., Vogel S., Renals S.
670	Time course-dependent methanogenic crude oil biodegradation: Dynamics of fumarate addition metabolites, biodegradative genes, and microbial community composition	2018	10.3389/fmicb.2017.02610	Article	English	34	Toth C.R.A., Gieg L.M.
671	New method for predicting n-tetradecane/bitumen mixture density: Correlation development	2018	10.2516/ogst/2018037	Article	English	7	Rostami A., Shokrollahi A., Ghazanfari M.H.
672	N-acetylcysteine (NAC) ameliorates lipid-related metabolic dysfunction in bone marrow stromal cells-derived adipocytes	2018	10.1155/2018/5310961	Article	English	14	Raffaele M., Barbagallo I., Licari M., Carota G., Sferrazzo G., Spampinato M., Sorrenti V., Vanella L.
673	WiSeBE: Window-based sentence boundary evaluation	2018	10.1007/978-3-030-04497-8_10	Conference Paper	English	1	González-Gallardo C.-E., Torres-Moreno J.-M.
674	Transcriptome analysis of oleoresin-producing tree sindora glabra and characterization of sesquiterpene synthases	2018	10.3389/fpls.2018.01619	Article	English	6	Yu N., Yang J.-C., Yin G.-T., Li R.-S., Zou W.-T.
675	Thermosipho spp. Immune system differences affect variation in genome size and geographical distributions	2018	10.1093/gbe/evy202	Article	English	2	Haverkamp T.H.A., Geslin C., Lossouarn J., Podosokorskaya O.A., Kublanov I., Nesbø C.L.
676	Assessment of the bacterial community structure in shallow and deep sediments of the Perdido Fold Belt region in the Gulf of Mexico	2018	10.7717/peerj.5583	Article	English	18	Fernanda Sánchez-Soto Jiménez Ma., Cerqueda-García D., Montero-Muñoz J.L., Leopoldina Aguirre-Macedo Ma., García-Maldonado J.Q.
677	Phylogenetic diversity of microorganisms from the sludge of a biogas reactor processing oil-containing and municipal waste	2018	10.1134/s0026261718030074	Article	English	16	Nazina T.N., Sokolova D.S., Babich T.L., Semenova E.M., Borzenkov I.A., Bidzhieva S.K., Merkel A.Y., Khisametdinov M.R., Tourova T.P.
678	Classification of Foetal Distress and Hypoxia Using Machine Learning Approaches	2018	10.1007/978-3-319-95957-3_81	Conference Paper	English	8	Abbas R., Hussain A.J., Al-Jumeily D., Baker T., Khattak A.
679	Formation of anti-corrosion films on metal of oil equipment by method of polarization of technological liquids	2018	10.24887/0028-2448-2018-5-84-86	Article	Russian	8	Skuridin N.N., Latypova D.R., Pechenkina M.Yu., Latypov O.R., Bugay D.E., Ryabukhina V.N.
680	Oral Helicobacter pylori: Interactions with host and microbial flora of the oral cavity [Helicobacter pylori w jamie ustnej – Interakcje z mikrobiotą gospodarza]	2018	10.17219/dmp/81259	Review	English	6	Krzyżek P., Gościniak G.
681	Metabolic capability and in situ activity of microorganisms in an oil reservoir	2018	10.1186/s40168-017-0392-1	Article	English	44	Liu Y.-F., Galzerani D.D., Mbadinga S.M., Zaramela L.S., Gu J.-D., Mu B.-Z., Zengler K.
682	RNA-seq transcriptome analysis of the immature seeds of two Brassica napus lines with extremely different thousand-seed weight to identify the candidate genes related to seed weight	2018	10.1371/journal.pone.0191297	Article	English	8	Geng X., Dong N., Wang Y., Li G., Wang L., Guo X., Li J., Wen Z., Wei W.
683	Dynamics of a microbial community during an effective boost MEOR trial using high-throughput sequencing	2018	10.1039/c7ra12245d	Article	English	5	Su S., Dong H., Chai L., Zhang X., Banat I.M., Wang Z., Hou D., Zhang F., She Y.
684	Methanogenic paraffin biodegradation: Alkylsuccinate synthase gene quantification and dicarboxylic acid production	2018	10.1128/aem.01773-17	Article	English	16	Oberding L.K., Gieg L.M.
685	Combining stable carbon isotope analysis and petroleum-fingerprinting to evaluate petroleum contamination in the Yanchang oilfield located on loess plateau in China	2018	10.1007/s11356-017-0500-6	Article	English	32	Wang Y., Liang J., Wang J., Gao S.
686	Microbial community analysis of three hydrocarbon reservoir cores provides valuable insights for the assessment of reservoir souring potential	2018	10.1016/j.ibiod.2016.09.002	Article	English	16	Tsesmetzis N., Alsop E.B., Vigneron A., Marcelis F., Head I.M., Lomans B.P.
687	Application of Bacillus spp. in Pilot Test of Microbial Huff and Puff to Improve Heavy Oil Recovery	2017	10.1021/acs.energyfuels.7b02517	Article	English	20	Sun S., Luo Y., Zhou Y., Xiao M., Zhang Z., Hou J., Wei X., Xu Q., Sha T., Dong H., Song H., Zhang Z.
688	An implementation of infants' gut microbiome maturation analyses by 16s rRNA from stool samples in extraction solution of room temperature	2017	10.1109/bibm.2017.8217778	Conference Paper	English	0	Liang B., Fan W., Han J.G., Chen N., Zhao N.
689	Sewers as potential reservoirs of antibiotic resistance	2017	10.1016/j.scitotenv.2017.06.153	Article	English	83	Auguet O., Pijuan M., Borrego C.M., Rodriguez-Mozaz S., Triadó-Margarit X., Giustina S.V.D., Gutierrez O.
690	Natural Attenuation of Nonionic Surfactants Used in Hydraulic Fracturing Fluids: Degradation Rates, Pathways, and Mechanisms	2017	10.1021/acs.est.7b01539	Article	English	34	Heyob K.M., Blotevogel J., Brooker M., Evans M.V., Lenhart J.J., Wright J., Lamendella R., Borch T., Mouser P.J.
691	Responses of microbial community composition to temperature gradient and carbon steel corrosion in production water of petroleum reservoir	2017	10.3389/fmicb.2017.02379	Article	English	30	Li X.-X., Yang T., Mbadinga S.M., Liu J.-F., Yang S.-Z., Gu J.-D., Mu B.-Z.
692	Biotechnological applications of microbial (Per)chlorate reduction	2017	10.3390/microorganisms5040076	Review	English	22	Wang O., Coates J.D.
693	Genomic and phenotypic characteristics of Swedish C. jejuni water isolates	2017	10.1371/journal.pone.0189222	Article	English	9	Nilsson A., Johansson C., Skarp A., Kaden R., Engstrand L., Rautelin H.
694	Chemical dispersants enhance the activity of oil- and gas condensate-degrading marine bacteria	2017	10.1038/ismej.2017.129	Article	English	74	Tremblay J., Yergeau E., Fortin N., Cobanli S., Elias M., King T.L., Lee K., Greer C.W.
695	Corrosion of carbon steel in the presence of oilfield deposit and thiosulphate-reducing bacteria in CO2 environment	2017	10.1016/j.corsci.2017.09.011	Article	English	45	Machuca L.L., Lepkova K., Petroski A.
696	Autotransporter domain-dependent enzymatic analysis of a novel extremely thermostable carboxylesterase with high biodegradability towards pyrethroid pesticides	2017	10.1038/s41598-017-03561-8	Article	English	20	Cai X., Wang W., Lin L., He D., Huang G., Shen Y., Wei W., Wei D.
697	Introduction to petroleum biotechnology	2017	10.1016/c2015-0-02007-x	Book	English	9	Speight J.G., El-Gendy N.S.
698	Rokubacteria: Genomic giants among the uncultured bacterial phyla	2017	10.3389/fmicb.2017.02264	Article	English	64	Becraft E.D., Woyke T., Jarett J., Ivanova N., Godoy-Vitorino F., Poulton N., Brown J.M., Brown J., Lau M., Onstott T., Eisen J.A., Moser D., Stepanauskas R.
699	Calibrating and interpreting implicit-texture models of foam flow through porous media of different permeabilities	2017	10.1016/j.petrol.2017.09.069	Article	English	17	Gassara O., Douarche F., Braconnier B., Bourbiaux B.
700	Identification of fitness determinants during energy-limited growth arrest in Pseudomonas aeruginosa	2017	10.1128/mbio.01170-17	Article	English	31	Basta D.W., Bergkessel M., Newman D.K.
701	Streptococcus gordonii pheromone s.G.cAM373 may influence the reservoir of antibiotic resistance determinants of Enterococcus faecalis origin in the oral metagenome	2017	10.1099/jmm.0.000613	Article	English	4	Mansfield J.M., Herrmann P., Jesionowski A.M., Vickerman M.M.
702	Isolation and complete genome sequence of Halorientalis hydrocarbonoclasticus sp. nov., a hydrocarbon-degrading haloarchaeon	2017	10.1007/s00792-017-0968-5	Article	English	13	Zhao D., Kumar S., Zhou J., Wang R., Li M., Xiang H.
703	Characterizing the CO2-brine interfacial tension (IFT) using robust modeling approaches: A comparative study	2017	10.1016/j.molliq.2017.09.010	Article	English	38	Kamari A., Pournik M., Rostami A., Amirlatifi A., Mohammadi A.H.
704	Enhancing photosynthetic biomass productivity of industrial oleaginous microalgae by overexpression of RuBisCO activase	2017	10.1016/j.algal.2017.07.023	Article	English	69	Wei L., Wang Q., Xin Y., Lu Y., Xu J.
705	Spermine inhibits Vibrio cholerae biofilm formation through the NspS–MbaA polyamine signaling system	2017	10.1074/jbc.m117.801068	Article	English	27	Sobe R.C., Bond W.G., Wotanis C.K., Zayner J.P., Burriss M.A., Fernandez N., Bruger E.L., Waters C.M., Neufeld H.S., Karatan E.
706	The carbonate concretions of Chang-7 and their hydrocarbon significance in southern Ordos Basin, China	2017	10.3969/j.issn.1671-9727.2017.05.06	Article	Chinese	6	Dong J., Hu Z., Yuan X., He J., Li Y., Wang Y.
707	Characterization of microbial community in produced water from a petroleum reservoir subjected to alkali-surfactant-polymer (ASP) flooding	2017	10.13287/j.1001-9332.201710.038	Article	Chinese	1	Hao Q.-Q., Shi R.-J., Hao J.-S., Zhao J.-Y., Li G.-Q., Zhao F., Han S.-Q., Zhang Y.
708	Petrothermobacter organivorans gen. Nov., sp. nov., a thermophilic, strictly anaerobic bacterium of the phylum deferribacteres isolated from a deep subsurface oil reservoir	2017	10.1099/ijsem.0.002234	Article	English	12	Tamazawa S., Mayumi D., Mochimaru H., Sakata S., Maeda H., Wakayama T., Ikarashi M., Kamagata Y., Tamaki H.
709	Characterization of Livestock-Associated Methicillin-Resistant Staphylococcus aureus CC398 and mecC-positive CC130 from Zoo Animals in the United Kingdom	2017	10.1089/mdr.2017.0161	Article	English	9	Bortolami A., Verin R., Chantrey J., Corrò M., Ashpole I., Lopez J., Timofte D.
710	Propionate metabolism and diversity of relevant functional genes by in silico analysis and detection in subsurface petroleum reservoirs	2017	10.1007/s11274-017-2350-2	Article	English	2	Yang T., Mbadinga S.M., Zhou L., Yang S.-Z., Liu J.-F., Gu J.-D., Mu B.-Z.
711	Response of microbial community and catabolic genes to simulated petroleum hydrocarbon spills in soils/sediments from different geographic locations	2017	10.1111/jam.13549	Article	English	15	Liu Q., Tang J., Liu X., Song B., Zhen M., Ashbolt N.J.
712	Development of the first gene expression system for Salinicoccus strains with potential application in bioremediation of hypersaline wastewaters	2017	10.1007/s00253-017-8428-9	Article	English	1	Zhao D., Yang H., Chen J., Cheng F., Kumar S., Han J., Li M., Zhou J., Xiang H.
713	Inexpensive metagenomic DNA extraction protocol with high quality from marine sediments contaminated by petroleum hydrocarbons	2017	10.4238/gmr16039743	Article	English	1	García-Bautista I., Toledano-Thompson T., Dantán-González E., González-Montilla J., Valdez-Ojeda R.
714	Vitamin and amino acid auxotrophy in anaerobic consortia operating under methanogenic conditions	2017	10.1128/msystems.00038-17	Article	English	18	Hubalek V., Buck M., Tan B., Foght J., Wendeberg A., Berry D., Bertilsson S., Eilera A.
715	Succession in the petroleum reservoir microbiome through an oil field production lifecycle	2017	10.1038/ismej.2017.78	Article	English	96	Vigneron A., Alsop E.B., Lomans B.P., Kyrpides N.C., Head I.M., Tsesmetzis N.
716	Instrument-Centered Music Transcription of Solo Bass Guitar Recordings	2017	10.1109/taslp.2017.2702384	Article	English	6	Abeser J., Schuller G.
717	Biocorrosion and Its Impact on Carbon Steel API 5LX by Bacillus subtilis A1 and Bacillus cereus A4 Isolated From Indian Crude Oil Reservoir	2017	10.1007/s40735-017-0091-2	Article	English	23	Parthipan P., Babu T.G., Anandkumar B., Rajasekar A.
718	Type II chaperonin gene as a complementary barcode for 16S rRNA gene in study of Archaea diversity of petroleum reservoirs	2017	10.1016/j.ibiod.2017.04.015	Article	English	6	Liu Y.-F., Mbadinga S.M., Gu J.-D., Mu B.-Z.
719	Analyses of 16S rRNA and cpn60 gene sequences provide complementary information about potentially useful and harmful oil field microbiota	2017	10.1016/j.ibiod.2017.05.027	Article	English	5	Kryachko Y., Semler D., Vogrinetz J., Lemke M., Irvine R., Davidson J., Links M.G., McCarthy E.L., Haug B., Hemmingsen S.M.
720	Etiolation and flooding of donor plants enhance the capability of Arabidopsis explants to root	2017	10.1007/s11240-017-1244-1	Article	English	11	Massoumi M., Krens F.A., Visser R.G.F., De Klerk G.-J.M.
721	The urinary microbiota of men and women and its changes in women during bacterial vaginosis and antibiotic treatment	2017	10.1186/s40168-017-0305-3	Article	English	105	Gottschick C., Deng Z.-L., Vital M., Masur C., Abels C., Pieper D.H., Wagner-Döbler I.
722	Impact of salinity change on water quality variables from the sediment of an artificial lake under anaerobic conditions	2017	10.3390/su9081429	Article	English	3	Kim T.-H., Kang J.H., Kim S.H., Choi I.-S., Chang K.-H., Oh J.M., Kim K.-H.
723	Design features of offshore oil production platforms influence their susceptibility to biocorrosion	2017	10.1007/s00253-017-8356-8	Article	English	12	Duncan K.E., Davidova I.A., Nunn H.S., Stamps B.W., Stevenson B.S., Souquet P.J., Suflita J.M.
724	Membrane Lipids as Indicators for Viable Bacterial Communities Inhabiting Petroleum Systems	2017	10.1007/s00248-017-0954-6	Article	English	0	Gruner A., Mangelsdorf K., Vieth-Hillebrand A., Horsfield B., van der Kraan G.M., Köhler T., Janka C., Morris B.E.L., Wilkes H.
725	Transport and transcriptional regulation of oil production in plants	2017	10.1080/07388551.2016.1212185	Review	English	37	Manan S., Chen B., She G., Wan X., Zhao J.
726	Research progress of corrosion of steels induced by iron oxidizing bacteria	2017	10.11902/1005.4537.2016.039	Review	Chinese	16	Liu H.W., Liu H.F.
727	Potentiation of antibiotic against Pseudomonas aeruginosa biofilm: a study with plumbagin and gentamicin	2017	10.1111/jam.13476	Article	English	30	Gupta P., Sarkar A., Sandhu P., Daware A., Das M.C., Akhter Y., Bhattacharjee S.
728	Influence of oil pollution on soil microbial community diversity	2017	10.13345/j.cjb.160467	Article	Chinese	3	Li X.
729	Diversity and composition of sulfate-reducing microbial communities based on genomic DNA and RNA transcription in production water of high temperature and corrosive oil reservoir	2017	10.3389/fmicb.2017.01011	Article	English	44	Li X.X., Liu J.-F., Zhou L., Mbadinga S.M., Yang S.Z., Gu J.D., Mu B.-Z.
730	Tracing microbial hydrocarbon transformation processes in a high temperature petroleum reservoir using signature metabolites	2017	10.1016/j.orggeochem.2017.03.003	Article	English	9	Gruner A., Jarling R., Vieth-Hillebrand A., Mangelsdorf K., Janka C., van der Kraan G.M., Köhler T., Morris B.E.L., Wilkes H.
731	Community analysis of dental plaque and endotracheal tube biofilms from mechanically ventilated patients	2017	10.1016/j.jcrc.2017.02.020	Article	English	19	Marino P.J., Wise M.P., Smith A., Marchesi J.R., Riggio M.P., Lewis M.A.O., Williams D.W.
732	Coupled carbon and sulfur isotope behaviors and other geochemical perspectives into marine methane seepage	2017	10.1007/s13131-017-0998-y	Article	English	2	Liu L., Fu S., Zhang M., Guan H., Wu N.
733	Complete genome sequence of a versatile hydrocarbon degrader, Pseudomonas aeruginosa DN1 isolated from petroleum-contaminated soil	2017	10.1016/j.genrep.2017.04.001	Article	English	13	Dong W., He C., Li Y., Huang C., Chen F., Ma Y.
734	Microbial diversity of the hypersaline and lithium-rich Salar de Uyuni, Bolivia	2017	10.1016/j.micres.2017.02.007	Article	English	30	Haferburg G., Gröning J.A.D., Schmidt N., Kummer N.-A., Erquicia J.C., Schlömann M.
735	Potential of wheat bran to promote indigenous microbial enhanced oil recovery	2017	10.1007/s10295-017-1909-0	Article	English	8	Zhan Y., Wang Q., Chen C., Kim J.B., Zhang H., Yoza B.A., Li Q.X.
736	High-throughput metagenomic analysis of petroleum-contaminated soil microbiome reveals the versatility in xenobiotic aromatics metabolism	2017	10.1016/j.jes.2016.08.022	Article	English	42	Bao Y.-J., Xu Z., Li Y., Yao Z., Sun J., Song H.
737	Wellhead Samples of High-Temperature, Low-Permeability Petroleum Reservoirs Reveal the Microbial Communities in Wellbores	2017	10.1021/acs.energyfuels.7b00152	Article	English	9	Song Z., Yao Z., Zhao F., Sun G., Zhu W.
738	Editorial: Petroleum microbial biotechnology: Challenges and prospects	2017	10.3389/fmicb.2017.00833	Editorial	English	11	Ismail W.A., Van Hamme J.D., Kilbane J.J., Gu J.-D.
739	Functional and genetic characterization of hydrocarbon biodegrader and exopolymer-producing clones from a petroleum reservoir metagenomic library	2017	10.1080/09593330.2016.1218940	Article	English	2	Vasconcellos S.P., Sierra-Garcia I.N., Dellagnezze B.M., Vicentini R., Midgley D., Silva C.C., Santos Neto E.V., Volk H., Hendry P., Oliveira V.M.
740	The geochemical characteristics and origin of deep geothermal water in Baxian Sag	2017	10.13745/j.esf.2017.03.019	Article	Chinese	5	Zhao X., Li F., Zeng J., Jin F., Zhang W., Liu J., Zhang J.
741	Novel dental adhesive with triple benefits of calcium phosphate recharge, protein-repellent and antibacterial functions	2017	10.1016/j.dental.2017.03.002	Article	English	36	Xie X., Wang L., Xing D., Zhang K., Weir M.D., Liu H., Bai Y., Xu H.H.K.
742	Diversity of metabolically active bacteria in water-flooded high-temperature heavy oil reservoir	2017	10.3389/fmicb.2017.00707	Article	English	38	Nazina T.N., Shestakova N.M., Semenova E.M., Korshunova A.V., Kostrukova N.K., Tourova T.P., Min L., Feng Q., Poltaraus A.B.
743	A Microbial Exopolysaccharide Produced by Sphingomonas Species for Enhanced Heavy Oil Recovery at High Temperature and High Salinity	2017	10.1021/acs.energyfuels.6b02923	Article	English	50	Li Y., Xu L., Gong H., Ding B., Dong M., Li Y.
744	Four human Plasmodium species quantification using droplet digital PCR	2017	10.1371/journal.pone.0175771	Article	English	41	Srisutham S., Saralamba N., Malleret B., Rénia L., Dondorp A.M., Imwong M.
745	Use of three monitoring approaches to manage a major Chrysosporum ovalisporum bloom in the Murray River, Australia, 2016	2017	10.1007/s10661-017-5916-4	Article	English	12	Crawford A., Holliday J., Merrick C., Brayan J., van Asten M., Bowling L.
746	Spread from the sink to the patient: In situ study using green fluorescent protein (GFP)-expressing Escherichia coli to model bacterial dispersion from hand-washing sink-trap reservoirs	2017	10.1128/aem.03327-16	Article	English	93	Kotay S., Chai W., Guilford W., Barry K., Mathers A.J.
747	Biofilm formation, invasiveness and colicinogeny in locus of enterocyte and effacement negative O113:H21 Shigatoxigenic Escherichia coli	2017	10.1111/jam.13409	Article	English	5	dos Santos L.F., Biscola F.T., Gonçalves E.M., Guth B.E.C.
748	Spatiotemporal variation of bacterial and archaeal communities in sediments of a drinking reservoir, Beijing, China	2017	10.1007/s00253-016-8019-1	Article	English	25	Chen Y., Liu Y., Wang X.
749	Different phenotypes of mature biofilm in Flavobacterium psychrophilum share a potential for virulence that differs from planktonic state	2017	10.3389/fcimb.2017.00076	Article	English	26	Levipan H.A., Avendaño-Herrera R.
750	Diversity and community structure of cyanobacteria and other microbes in recycling irrigation reservoirs	2017	10.1371/journal.pone.0173903	Article	English	7	Kong P., Richardson P., Hong C.
751	Real-time PCR assays for the detection and quantification of carbapenemase genes (bla KPC, bla NDM, and bla OXA-48) in environmental samples	2017	10.1007/s11356-017-8426-6	Article	English	38	Subirats J., Royo E., Balcázar J.L., Borrego C.M.
752	The effect of body mass index on fluoroscopy time and radiation dose in intra-articular glenohumeral joint injections	2017	10.1016/j.clinimag.2016.11.008	Article	English	5	Mattie R., McCormick Z.L., Fogg B., Cushman D.M.
753	Methane-oxidizing bacteria shunt carbon to microbial mats at a marine hydrocarbon seep	2017	10.3389/fmicb.2017.00186	Article	English	24	Paul B.G., Ding H., Bagby S.C., Kellermann M.Y., Redmond M.C., Andersen G.L., Valentine D.L.
754	Removal capacities of polycyclic aromatic hydrocarbons (PAHs) by a newly isolated strain from oilfield produced water	2017	10.3390/ijerph14020215	Article	English	48	Qi Y.-B., Wang C.-Y., Lv C.-Y., Lun Z.-M., Zheng C.-G.
755	Shifts in microbial community structure and function in surface waters impacted by unconventional oil and gas wastewater revealed by metagenomics	2017	10.1016/j.scitotenv.2016.12.079	Article	English	30	Fahrenfeld N.L., Delos Reyes H., Eramo A., Akob D.M., Mumford A.C., Cozzarelli I.M.
756	Diverse toxicological risks of PAHs in surface water with an impounding level of 175 m in the Three Gorges Reservoir Area, China	2017	10.1016/j.scitotenv.2016.12.064	Article	English	30	Tang Y.-M., Junaid M., Niu A., Deng S., Pei D.-S.
757	Molecular characterization of mycolactone producing mycobacteria from aquatic environments in buruli ulcer non-endemic areas in côte d’ivoire	2017	10.3390/ijerph14020178	Article	English	6	Tano M.B., Dassi C., Mosi L., Koussémon M., Bonfoh B.
758	Compositions and abundances of sulfate-reducing and sulfur-oxidizing microorganisms in water-flooded petroleum reservoirs with different temperatures in China	2017	10.3389/fmicb.2017.00143	Article	English	62	Tian H., Gao P., Chen Z., Li Y., Li Y., Wang Y., Zhou J., Li G., Ma T.
759	Pleomorphochaeta caudata gen. Nov., sp. nov., an anaerobic bacterium isolated from an offshore oil well, reclassification of Sphaerochaeta multiformis MO-SPC2T as pleomorphochaeta multiformis MO-SPC2T comb. nov. as the type strain of this novel genus and emended description of the genus Sphaerochaeta	2017	10.1099/ijsem.0.001641	Article	English	10	Arroua B., Ranchou-Peyruse A., Ranchou-Peyruse M., Magot M., Urios L., Grimaud R.
760	The potential of indigenous Paenibacillus ehimensis BS1 for recovering heavy crude oil by biotransformation to light fractions	2017	10.1371/journal.pone.0171432	Article	English	25	Shibulal B., Al-Bahry S.N., Al-Wahaibi Y.M., Elshafie A.E., Al-Bemani A.S., Joshi S.J.
761	Metabolomic and metagenomic analysis of two crude oil production pipelines experiencing differential rates of corrosion	2017	10.3389/fmicb.2017.00099	Article	English	32	Bonifay V., Wawrik B., Sunner J., Snodgrass E.C., Aydin E., Duncan K.E., Callaghan A.V., Oldham A., Liengen T., Beech I.
762	Low-level predation by lytic phage phiIPLA-RODI promotes biofilm formation and triggers the stringent response in Staphylococcus aureus	2017	10.1038/srep40965	Article	English	38	Fernández L., González S., Campelo A.B., Martínez B., Rodríguez A., García P.
763	Stress response of the black coral Leiopathes glaberrima when exposed to sub-lethal amounts of crude oil and dispersant	2017	10.1525/elementa.261	Article	English	7	Ruiz-Ramos D.V., Fisher C.R., Baums I.B.
764	MIC under conditions of oxygen or nitrate ingress	2017	10.1201/9781315157818	Book Chapter	English	0	Mand J., Shen Y., Hoffmann H., Voordouw G.
765	Optimizing oil recovery through microbial injection to support the increasing demand for oil in Indonesia	2017	10.2118/186214-ms	Conference Paper	English	0	Budiharjo H., Suhascaryo N., Nugroho H.A., Saputra B.A.
766	Characterization of Origin and Evolution of Formation Water in Buried Hill of Jizhong Depression, China, Using Multivariate Statistical Analysis of Geochemical Data	2017	10.1155/2017/5290686	Article	English	5	Li F., Zeng J.
767	Genetic diversity of hydrocarbons degrading microbial functional gene (bssA) in the farmland soil typical of Jianghan Oilfeld	2017	10.11766/trxb201611040324	Article	Chinese	1	Zuo X., Wang M., Yao Y., Li Z., Zhou Z.
768	Anaerobic microbial diversity and abundance in Xinjiang low-temperature water-flooding petroleum reservoir	2017	10.25103/jestr.106.17	Article	English	0	Chai L., Zhang F., She Y., Banat I.M., Li X.
769	Addition of sodium hydroxide to seawater inhibits sulfide production (souring) by microbes in oil field water	2017	10.1252/jcej.16we257	Article	English	0	Miyanaga K., Hasegawa R., Tanji Y.
770	Effect of the environment on horizontal gene transfer between bacteria and archaea	2017	10.7717/peerj.3865	Article	English	49	Fuchsman C.A., Collins R.E., Rocap G., Brazelton W.J.
771	Modeling of CO2 solubility in crude oil during carbon dioxide enhanced oil recovery using gene expression programming	2017	10.1016/j.fuel.2017.08.110	Article	English	55	Rostami A., Arabloo M., Kamari A., Mohammadi A.H.
772	Cyclic Di-GMP and VpsR induce the expression of type II secretion in vibrio cholerae	2017	10.1128/jb.00106-17	Article	English	17	Sloup R.E., Konal A.E., Severin G.B., Korir M.L., Bagdasarian M.M., Bagdasarian M., Waters C.M.
773	Acoustic dose-behavioral response relationship in sea bass (Dicentrarchus labrax) exposed to playbacks of pile driving sounds	2017	10.1016/j.marenvres.2017.08.010	Article	English	8	Kastelein R.A., Jennings N., Kommeren A., Helder-Hoek L., Schop J.
774	A reliable strategy to calculate minimum miscibility pressure of CO2-oil system in miscible gas flooding processes	2017	10.1016/j.fuel.2017.06.135	Article	English	29	Ahmadi M.A., Zendehboudi S., James L.A.
775	New insights into the spatial variability of biofilm communities and potentially negative bacterial groups in hydraulic concrete structures	2017	10.1016/j.watres.2017.06.055	Article	English	29	Cai W., Li Y., Niu L., Zhang W., Wang C., Wang P., Meng F.
776	Thermodynamic analysis of a novel pumped thermal energy storage system utilizing ambient thermal energy and LNG cold energy	2017	10.1016/j.enconman.2017.06.044	Article	English	30	Wang G.-B., Zhang X.-R.
777	Biosurfactant formulation of Pseudomonas cepacia and application in the removal of oil from coral reef	2017	10.3303/cet1757109	Article	English	4	De Cássia Soares Da Silva R.F., Almeida D.G., Brasileiro P.P.F., Rufino R.D., Luna J.M., Sarubbo L.A.
778	Possible use of biosurfactant produced by Microbial consortium from contaminated soil for microbially enhanced oil recovery	2017	10.3303/cet1757236	Article	English	10	Bezza F.A., Chirwa E.M.N.
779	Vertical and horizontal distribution of sediment nitrite-dependent methane-oxidizing organisms in a mesotrophic freshwater reservoir	2017	10.1139/cjm-2016-0585	Article	English	11	Long Y., Liu C., Lin H., Li N., Guo Q., Xie S.
780	Thermoregulation of biofilm formation in burkholderia pseudomallei is disrupted by mutation of a putative diguanylate cyclase	2017	10.1128/jb.00780-16	Article	English	20	Plumley B.A., Martin K.H., Borlee G.I., Marlenee N.L., Burtnick M.N., Brett P.J., AuCoin D.P., Bowen R.A., Schweizer H.P., Borlee B.R.
781	A natural host and diversity of pepper vein yellows virus in Japan	2017	10.6090/jarq.51.59	Article	English	2	Murakami R., Kawano S.
782	Controlled release of chlorhexidine from a mesoporous silica-containing macroporous titanium dental implant prevents microbial biofilm formation	2017	10.22203/ecm.v033a02	Article	English	19	De Cremer K., Braem A., Gerits E., De Brucker K., Vandamme K., Martens J.A., Michiels J., Vleugels J., Cammue B.P.A., Thevissen K.
783	Influence of chemical speciation and biofilm composition on mercury accumulation by freshwater biofilms	2017	10.1039/c6em00493h	Article	English	20	Dranguet P., Le Faucheur S., Cosio C., Slaveykova V.I.
784	Design and characterization of a microbial self-healing gel for enhanced oil recovery	2017	10.1039/c6ra25814j	Article	English	12	Wu J., Wang H.-F., Wang X.-B., Yang H.-Y., Jiang R.-Y., Zeng R.J.
785	Emergence of Life on Earth: A Physicochemical Jigsaw Puzzle	2017	10.1007/s00239-016-9775-3	Review	English	7	Spitzer J.
786	Oxic and anoxic conditions affect arsenic (As) accumulation and arsenite transporter expression in rice	2017	10.1016/j.chemosphere.2016.10.114	Article	English	60	Wu C., Huang L., Xue S.-G., Pan W.-S., Zou Q., Hartley W., Wong M.-H.
787	Microbial diversity in degraded and non-degraded petroleum samples and comparison across oil reservoirs at local and global scales	2017	10.1007/s00792-016-0897-8	Article	English	25	Sierra-Garcia I.N., Dellagnezze B.M., Santos V.P., Chaves B M.R., Capilla R., Santos Neto E.V., Gray N., Oliveira V.M.
788	Identification of target genes and processes involved in erucic acid accumulation during seed development in the biodiesel feedstock Pennycress (Thlaspi arvense L.)	2017	10.1016/j.jplph.2016.10.011	Article	English	22	Claver A., Rey R., López M.V., Picorel R., Alfonso M.
789	Ammonium removal from high-salinity oilfield-produced water: assessing the microbial community dynamics at increasing salt concentrations	2017	10.1007/s00253-016-7902-0	Article	English	28	Quartaroli L., Silva L.C.F., Silva C.M., Lima H.S., de Paula S.O., de Oliveira V.M., de Cássia S. da Silva M., Kasuya M.C.M., de Sousa M.P., Torres A.P.R., Souza R.S., Bassin J.P., da Silva C.C.
790	Effect of microbial enhanced oil recovery in Ng3 block of Gudao reservior of Shengli oilfiled	2016	10.19346/j.cnki.1000-4092.2016.04.032	Article	Chinese	3	Ma B., Liu T., Cao G., Wang Y., Ba Y., Cao Y.
791	Isolation and characterization of stenotrophomonas maltophilia isolates from a Brazilian Hospital	2016	10.1089/mdr.2015.0306	Article	English	14	Gallo S.W., Figueiredo T.P., Bessa M.C., Pagnussatti V.E., Ferreira C.A.S., Oliveira S.D.
792	Activation of CO2-reducing methanogens in oil reservoir after addition of nutrient	2016	10.1016/j.jbiosc.2016.06.011	Article	English	11	Yang G.-C., Zhou L., Mbadinga S.M., You J., Yang H.-Z., Liu J.-F., Yang S.-Z., Gu J.-D., Mu B.-Z.
793	Degradation of hydrocarbons by indigenous microbial communities from two adjacent oil production wells in one block	2016	10.1080/15567036.2014.943853	Article	English	1	Liu H., Yao J., Yuan Z., Chen H., Wang F., Masakorala K., Choi M.M.F.
794	Rhamnolipids produced by indigenous Acinetobacter junii from petroleum reservoir and its potential in enhanced oil recovery	2016	10.3389/fmicb.2016.01710	Article	English	25	Dong H., Xia W., Dong H., She Y., Zhu P., Liang K., Zhang Z., Liang C., Song Z., Sun S., Zhang G.
795	Characterization of an anaerobic marine microbial community exposed to combined fluxes of perchlorate and salinity	2016	10.1007/s00253-016-7780-5	Article	English	22	Carlström C.I., Lucas L.N., Rohde R.A., Haratian A., Engelbrektson A.L., Coates J.D.
796	Diversity and abundance of ammonia-oxidizing bacteria (AOB) revealed by PCR amplification of amoA gene in a polyacrylamide transportation system of an oilfield	2016	10.1016/j.ibiod.2016.08.001	Article	English	5	Li C.-Y., Hu H., Feng J.-Y., Mbadinga S.M., Liu J.-F., Yang S.-Z., Gu J.-D., Mu B.-Z.
797	Streptococcus pyogenes adhesion and colonization	2016	10.1002/1873-3468.12254	Review	English	69	Brouwer S., Barnett T.C., Rivera-Hernandez T., Rohde M., Walker M.J.
798	Comparative Study of Effects of CO2 Concentration and pH on Microbial Communities from a Saline Aquifer, a Depleted Oil Reservoir, and a Freshwater Aquifer	2016	10.1089/ees.2015.0368	Article	English	15	Gulliver D.M., Lowry G.V., Gregory K.B.
799	Microbial communities responsible for fixation of CO2 revealed by using mcrA, cbbM, cbbL, fthfs, fefe-hydrogenase genes as molecular biomarkers in petroleum reservoirs of different temperatures	2016	10.1016/j.ibiod.2016.06.019	Article	English	7	Liu J.-F., Mbadinga S.M., Sun X.-B., Yang G.-C., Yang S.-Z., Gu J.-D., Mu B.-Z.
800	Molecular diversity of bacterial bamA gene involved in anaerobic degradation of aromatic hydrocarbons in mesophilic petroleum reservoirs	2016	10.1016/j.ibiod.2016.06.005	Article	English	30	Ruan M.-Y., Liang B., Mbadinga S.M., Zhou L., Wang L.-Y., Liu J.-F., Gu J.-D., Mu B.-Z.
801	Dominance of Desulfotignum in sulfate-reducing community in high sulfate production-water of high temperature and corrosive petroleum reservoirs	2016	10.1016/j.ibiod.2016.05.018	Article	English	39	Li X.-X., Liu J.-F., Yao F., Wu W.-L., Yang S.-Z., Mbadinga S.M., Gu J.-D., Mu B.-Z.
802	Environmental drivers of differences in microbial community structure in crude oil reservoirs across a methanogenic gradient	2016	10.3389/fmicb.2016.01535	Article	English	28	Shelton J.L., Akob D.M., McIntosh J.C., Fierer N., Spear J.R., Warwick P.D., McCray J.E.
803	Enterococcus species in the oral cavity: Prevalence, virulence factors and antimicrobial susceptibility	2016	10.1371/journal.pone.0163001	Article	English	78	Komiyama E.Y., Lepesqueur L.S.S., Yassuda C.G., Samaranayake L.P., Parahitiyawa N.B., Balducci I., Koga-Ito C.Y.
804	A novel bioremediation strategy for petroleum hydrocarbon pollutants using salt tolerant Corynebacterium variabile HRJ4 and biochar	2016	10.1016/j.jes.2015.12.023	Article	English	80	Zhang H., Tang J., Wang L., Liu J., Gurav R.G., Sun K.
805	First evaluation of foraminiferal metabarcoding for monitoring environmental impact from an offshore oil drilling site	2016	10.1016/j.marenvres.2016.08.009	Article	English	56	Laroche O., Wood S.A., Tremblay L.A., Ellis J.I., Lejzerowicz F., Pawlowski J., Lear G., Atalah J., Pochon X.
806	Characterization, production and optimization of lipopeptide biosurfactant by new strain Bacillus pumilus 2IR isolated from an Iranian oil field	2016	10.1016/j.petrol.2016.06.015	Article	English	24	Fooladi T., Moazami N., Abdeshahian P., Kadier A., Ghojavand H., Wan Yusoff W.M., Hamid A.A.
807	Marine Processing Proteinaceous By-Products: A Source of Biofunctional Food Ingredients	2016	10.1016/b978-0-12-802391-4.00004-5	Book Chapter	English	2	Neves A.C., Harnedy P.A., FitzGerald R.J.
808	Genomic characterization of Defluviitoga tunisiensis L3, a key hydrolytic bacterium in a thermophilic biogas plant and its abundance as determined by metagenome fragment recruitment	2016	10.1016/j.jbiotec.2016.05.001	Article	English	39	Maus I., Cibis K.G., Bremges A., Stolze Y., Wibberg D., Tomazetto G., Blom J., Sczyrba A., König H., Pühler A., Schlüter A.
809	Phytochemicals as inhibitors of candida biofilm	2016	10.2174/1381612822666160601104721	Review	English	13	Raut J.S., Karuppayil S.M.
810	Occurrence of diarrhoeagenic Escherichia coli virulence genes in water and bed sediments of a river used by communities in Gauteng, South Africa	2016	10.1007/s11356-016-6762-6	Article	English	8	Abia A.L.K., Ubomba-Jaswa E., Momba M.N.B.
811	Subinhibitory concentrations of allicin decrease uropathogenic escherichia coli (UPEC) biofilm formation, adhesion ability, and swimming motility	2016	10.3390/ijms17070979	Article	English	22	Yang X., Sha K., Xu G., Tian H., Wang X., Chen S., Wang Y., Li J., Chen J., Huang N.
812	Evaluation of bacterial diversity recovered from petroleum samples using different physical matrices	2016	10.1016/j.bjm.2016.04.004	Article	English	6	Dellagnezze B.M., Vasconcellos S.P.D., Melo I.S.D., Santos Neto E.V.D., Oliveira V.M.D.
813	Universal indicators for oil and gas prospecting based on bacterial communities shaped by light-hydrocarbon microseepage in China	2016	10.4014/jmb.1602.02045	Article	English	5	Deng C., Yu X., Yang J., Li B., Sun W., Yuan H.
814	Pulsed blooms and persistent oil-degrading bacterial populations in the water column during and after the Deepwater Horizon blowout	2016	10.1016/j.dsr2.2014.01.014	Article	English	82	Yang T., Nigro L.M., Gutierrez T., D'Ambrosio L., Joye S.B., Highsmith R., Teske A.
815	Oil-derived marine aggregates - hot spots of polysaccharide degradation by specialized bacterial communities	2016	10.1016/j.dsr2.2014.12.008	Article	English	46	Arnosti C., Ziervogel K., Yang T., Teske A.
816	Bioaugmentation strategy employing a microbial consortium immobilized in chitosan beads for oil degradation in mesocosm scale	2016	10.1016/j.marpolbul.2016.04.011	Article	English	43	Dellagnezze B.M., Vasconcellos S.P., Angelim A.L., Melo V.M.M., Santisi S., Cappello S., Oliveira V.M.
817	Isolation and characterization of a novel paraffin wax-degrading bacterium, Pseudomonas sp strain PW-1, from petroleum-contaminated sites	2016	10.4238/gmr.15028021	Article	English	5	Zhang Y.L., Liu Z., Liu T.
818	Persistent Hg contamination and occurrence of Hg-methylating transcript (hgcA) downstream of a chlor-alkali plant in the Olt River (Romania)	2016	10.1007/s11356-015-5906-4	Article	English	45	Bravo A.G., Loizeau J.-L., Dranguet P., Makri S., Björn E., Ungureanu V.G., Slaveykova V.I., Cosio C.
819	Microbial enhanced oil recovery—a modeling study of the potential of spore-forming bacteria	2016	10.1007/s10596-015-9526-3	Article	English	16	Nielsen S.M., Nesterov I., Shapiro A.A.
820	Firmicutes is an Important Component of Microbial Communities in Water-Injected and Pristine Oil Reservoirs, Western Siberia, Russia	2016	10.1080/01490451.2015.1045635	Article	English	26	Frank Y., Banks D., Avakian M., Antsiferov D., Kadychagov P., Karnachuk O.
821	Isolation, identification, and crude oil degradation characteristics of a high-temperature, hydrocarbon-degrading strain	2016	10.1016/j.marpolbul.2015.09.053	Article		0	Liu, B., Ju, M., Liu, J., Wu, W., Li, X.
822	Rhizospheric Mechanisms of Hemerocallis middendorfii Trautv. et Mey. remediating petroleum-contaminated soil and metabonomic analyses of the root systems	2016	10.13227/j.hjkx.2016.05.048	Article	Chinese	3	Wang Y.-N., Cheng L.-J., Zhou Q.-X.
823	Quorum sensing autoinducers enhance biofilm formation and power production in a hypersaline microbial fuel cell	2016	10.1016/j.bej.2016.01.023	Article	English	56	Monzon O., Yang Y., Li Q., Alvarez P.J.J.
824	Deposit reduction in a high pour point oil reservoir due to the activity of indigenous bacterial communities	2016	10.1016/j.ibiod.2016.02.009	Article	English	5	He Y., Zhang F., Banat I.M., Pu C., Dong H., Shu F., Shi Q., She Y.
825	Polyphasic analysis of an Azoarcus-Leptothrix-dominated bacterial biofilm developed on stainless steel surface in a gasoline-contaminated hypoxic groundwater	2016	10.1007/s11356-016-6128-0	Article	English	20	Benedek T., Táncsics A., Szabó I., Farkas M., Szoboszlay S., Fábián K., Maróti G., Kriszt B.
826	Phytoremediation of petroleum contaminated soils with Iris pseudacorus L. and the metabolic analysis in roots	2016	10.13227/j.hjkx.2016.04.044	Article	Chinese	5	Wang Y.-N., Cheng L.-J., Zhou Q.-X.
827	Low concentrations of nitric oxide modulate streptococcus pneumoniae biofilm metabolism and antibiotic tolerance	2016	10.1128/aac.02432-15	Article	English	25	Allan R.N., Morgan S., Brito-Mutunayagam S., Skipp A.P., Feelisch M., Hayes S.M., Hellier W., Clarke S.C., Stoodley P., Burgess A., Ismail-Koch H., Salib R.J., Webb J.S., Faust S.N., Hall-Stoodley L.
828	Complementary microorganisms in highly corrosive biofilms from an offshore oil production facility	2016	10.1128/aem.03842-15	Article	English	98	Vigneron A., Alsop E.B., Chambers B., Lomans B.P., Head I.M., Tsesmetzis N.
829	Molecular analysis of dominant species in Listeria monocytogenes-positive biofilms in the drains of food processing facilities	2016	10.1007/s00253-015-7203-z	Article	English	13	Liu Y., Zhang H., Wu C., Deng W., Wang D., Zhao G., Song J., Jiang Y.
830	New perspectives for the design of sustainable bioprocesses for phosphorus recovery from waste	2016	10.1016/j.biortech.2016.01.091	Review	English	98	Tarayre C., De Clercq L., Charlier R., Michels E., Meers E., Camargo-Valero M., Delvigne F.
831	Formate-dependent microbial conversion of CO2 and the dominant pathways of methanogenesis in production water of high-temperature oil reservoirs amended with bicarbonate	2016	10.3389/fmicb.2016.00365	Article	English	15	Yang G.-C., Zhou L., Mbadinga S.M., Liu J.-F., Yang S.-Z., Gu J.-D., Mu B.-Z.
832	The sunflower transcription factor HaHB11 improves yield, biomass and tolerance to flooding in transgenic Arabidopsis plants	2016	10.1016/j.jbiotec.2016.02.015	Article	English	29	Cabello J.V., Giacomelli J.I., Piattoni C.V., Iglesias A.A., Chan R.L.
833	Preservation of ancestral Cretaceous microflora recovered from a hypersaline oil reservoir	2016	10.1038/srep22960	Article	English	11	Gales G., Tsesmetzis N., Neria I., Alazard D., Coulon S., Lomans B.P., Morin D., Ollivier B., Borgomano J., Joulian C.
834	Biodegradation of waste greases and biochemical properties of a novel lipase from Pseudomonas synxantha PS1	2016	10.1139/cjm-2015-0641	Article	English	7	Cai X., Chen S., Yang H., Wang W., Lin L., Shen Y., Wei W., Wei D.-Z.
835	The biofilm property and its correlationship with high-molecular-weight polyacrylamide degradation in a water injection pipeline of Daqing oilfield	2016	10.1016/j.jhazmat.2015.10.067	Article	English	42	Li C.-Y., Zhang D., Li X.-X., Mbadinga S.M., Yang S.-Z., Liu J.-F., Gu J.-D., Mu B.-Z.
836	Biodegradation potential of polycyclic aromatic hydrocarbons by bacteria strains enriched from Yangtze River sediments	2016	10.1080/09593330.2015.1074289	Article	English	24	Xu X., Chen X., Su P., Fang F., Hu B.
837	Ecotoxicity assessment using ciliate cells in millifluidic droplets	2016	10.1063/1.4944869	Article	English	8	Illing R., Burkart C., Pfitzner D., Jungmann D., Baraban L., Cuniberti G.
838	Methanogenic hydrocarbon degradation: Evidence from field and laboratory studies	2016	10.1159/000441679	Review	English	42	Jiménez N., Richnow H.H., Vogt C., Treude T., Krüger M.
839	Rapid method for the estimation of dew point pressures in gas condensate reservoirs	2016	10.1016/j.jtice.2015.10.011	Article	English	23	Kamari A., Sattari M., Mohammadi A.H., Ramjugernath D.
840	Bisulfite reductase gene expression of thermophilic sulphate-reducing bacteria from saline connate water of oil reservoirs with high temperature	2016	10.1016/j.ibiod.2015.05.029	Article	English	7	Zapata-Peñasco I., Salazar-Coria L., Saucedo-García M., Villa-Tanaca L., Hernández-Rodríguez C.
841	Selective inhibition of methanogenesis by sulfate in enrichment culture with production water from low-temperature oil reservoir	2016	10.1016/j.ibiod.2015.11.002	Article	English	17	Lv L., Zhou L., Wang L.-Y., Liu J.-F., Gu J.-D., Mu B.-Z., Yang S.-Z.
842	Study on the activation Geobacillus species in Zhan 3 blocks of Shengli Oilfield	2016	10.3969/j.issn.1673-5005.2016.01.023	Article	Chinese	1	Li C., Li Y., Wu X., Cao Y., Wang W., Bao M.
843	An exogenous surfactant-producing Bacillus subtilis facilitates indigenous microbial enhanced oil recovery	2016	10.3389/fmicb.2016.00186	Article	English	31	Gao P., Li G., Li Y., Li Y., Tian H., Wang Y., Zhou J., Ma T.
844	Prokaryotic Community Characterization in a Mesothermic and Water- Flooded Oil Reservoir in Colombia	2016	10.1080/01490451.2015.1039674	Article	English	6	Hernández-Torres J., Castillo Villamizar G.A., Salgar-Chaparro S.J., Silva-Plata B.A., Serna Daza O.D., Martínez-Pérez F., Mier Umaña R., Levy M., Fuentes J.L.
845	Spatial isolation and environmental factors drive distinct bacterial and archaeal communities in different types of petroleum reservoirs in China	2016	10.1038/srep20174	Article	English	56	Gao P., Tian H., Wang Y., Li Y., Li Y., Xie J., Zeng B., Zhou J., Li G., Ma T.
846	Comparison of Particle-Associated Bacteria from a Drinking Water Treatment Plant and Distribution Reservoirs with Different Water Sources	2016	10.1038/srep20367	Article	English	33	Liu G., Ling F.Q., Van Der Mark E.J., Zhang X.D., Knezev A., Verberk J.Q.J.C., Van Der Meer W.G.J., Medema G.J., Liu W.T., Van Dijk J.C.
847	Impact of coal particle size on biogenic methane metabolism and its significance	2016	10.1166/jctn.2016.5046	Article	English	2	Guo H., Liu X., Bai Y., Chen S.
848	High potential of adhesion to biotic and abiotic surfaces by opportunistic Staphylococcus aureus strains isolated from orthodontic appliances	2016	10.1016/j.micpath.2015.11.009	Article	English	16	Merghni A., Ben Nejma M., Dallel I., Tobji S., Ben Amor A., Janel S., Lafont F., Aouni M., Mastouri M.
849	Nitrite-dependent anaerobic methane oxidizing bacteria along the water level fluctuation zone of the Three Gorges Reservoir	2016	10.1007/s00253-015-7083-2	Article	English	43	Wang Y., Huang P., Ye F., Jiang Y., Song L., Op den Camp H.J.M., Zhu G., Wu S.
850	Phylogeny and physiology of candidate phylum 'Atribacteria' (OP9/JS1) inferred from cultivation-independent genomics	2016	10.1038/ismej.2015.97	Article	English	121	Nobu M.K., Dodsworth J.A., Murugapiran S.K., Rinke C., Gies E.A., Webster G., Schwientek P., Kille P., Parkes R.J., Sass H., Jørgensen B.B., Weightman A.J., Liu W.-T., Hallam S.J., Tsiamis G., Woyke T., Hedlund B.P.
851	Diverse, rare microbial taxa responded to the Deepwater Horizon deep-sea hydrocarbon plume	2016	10.1038/ismej.2015.121	Article	English	93	Kleindienst S., Grim S., Sogin M., Bracco A., Crespo-Medina M., Joye S.B.
852	Draft genome sequence of Paenibacillus sp. strain A2	2016	10.1186/s40793-015-0125-7	Article	English	2	Zheng B., Zhang F., Dong H., Chai L., Shu F., Yi S., Wang Z., Cui Q., Dong H., Zhang Z., Hou D., Yang J., She Y.
853	Carbonate precipitation through microbial activities in natural environment, and their potential in biotechnology: A review	2016	10.3389/fbioe.2016.00004	Review	English	329	Zhu T., Dittrich M.
854	Genome-resolved metagenomic analysis reveals roles for candidate phyla and other microbial community members in biogeochemical transformations in oil reservoirs	2016	10.1128/mbio.01669-15	Article	English	92	Hu P., Tom L., Singh A., Thomas B.C., Baker B.J., Piceno Y.M., Andersen G.L., Banfield J.F.
855	Evaluation of organic matter removal and electricity generation by using integrated microbial fuel cells for wastewater treatment	2016	10.1080/09593330.2015.1066874	Article	English	8	Yamashita T., Ishida M., Ogino A., Yokoyama H.
856	Enterococcus faecalis from food, clinical specimens, and oral sites: Prevalence of virulence factors in association with biofilm formation	2016	10.3389/fmicb.2015.01534	Article	English	107	Anderson A.C., Jonas D., Huber I., Karygianni L., Wölber J., Hellwig E., Arweiler N., Vach K., Wittmer A., Al-Ahmad A.
857	Rapid, economic microbial monitoring methodologies for determining treated water stability	2016	10.15530/urtec-2016-2459158	Conference Paper	English	2	Robertson A., Burnett D., McLeroy K.
858	CFD simulation of current past bluff body at high reynolds number	2016	10.4043/26911-ms	Conference Paper	English	2	Ibrahim A., Huang C.-P., Korpus R., Dalton C.
859	Pediatric Lower Limb Deformities: Principles and Techniques of Management	2016	10.1007/978-3-319-17097-8	Book	English	6	Sabharwal S.
860	Elastin-like recombinamers as smart drug delivery systems	2016	10.2174/1389450117666160201114617	Review	English	8	Arias F.J., Santos M., Ibáñez-Fonseca A., Piña M.J., Serrano S.
861	Hydrocarbonoclastic alcanivorax isolates exhibit different physiological and expression responses to N-dodecane	2016	10.3389/fmicb.2016.02056	Article	English	19	Barbato M., Scoma A., Mapelli F., De Smet R., Banat I.M., Daffonchio D., Boon N., Borin S.
862	Field studies of microbiologically influenced corrosion of mooring chains	2016	10.4043/27142-ms	Conference Paper	English	5	Witt D., Ma K.-T., Lee T., Gaylarde C., Celikkol S., Makama Z., Beech I.
863	Offshore oil and gas, and operational sheen occurrence: Is there potential harm to marine birds?	2016	10.1139/er-2015-0086	Review	English	7	Morandin L.A., O'Hara P.D.
864	Adhesion, biofilm formation, and genomic features of Campylobacter jejuni Bf, an atypical strain able to grow under aerobic conditions	2016	10.3389/fmicb.2016.01002	Article	English	36	Bronnec V., Turoňová H., Bouju A., Cruveiller S., Rodrigues R., Demnerova K., Tresse O., Haddad N., Zagorec M.
865	Genome-centric analysis of microbial populations enriched by hydraulic fracture fluid additives in a coal bed methane production well	2016	10.3389/fmicb.2016.00731	Article	English	35	Robbins S.J., Evans P.N., Parks D.H., Golding S.D., Tyson G.W.
866	Implications of limited thermophilicity of nitrite reduction for control of sulfide production in oil reservoirs	2016	10.1128/aem.00599-16	Article	English	44	Fida T.T., Chen C., Okpala G., Voordouw G.
867	Hospital acquired pneumonia due to Achromobacter spp. in a geriatric ward in China: Clinical characteristic, genome variability, biofilm production, antibiotic resistance and integron in isolated strains	2016	10.3389/fmicb.2016.00621	Article	English	13	Liu C., Pan F., Guo J., Yan W., Jin Y., Liu C., Qin L., Fang X.
868	Responses of microbial community from tropical pristine coastal soil to crude oil contamination	2016	10.7717/peerj.1733	Article	English	26	Morais D., Pylro V., Clark I.M., Hirsch P.R., Tótola M.R.
869	Predicting the oil well production based on multi expression programming	2016	10.2174/1874834101609010021	Article	English	3	Ma X., Liu Z.-B.
870	From rare to dominant: A fine-tuned soil bacterial bloom during petroleum hydrocarbon bioremediation	2016	10.1128/aem.02625-15	Article	English	92	Fuentes S., Barra B., Gregory Caporaso J., Seeger M.
871	Biodegradation of microcystin [Dha7]MC-LR by a novel microcystin-degrading bacterium in an internal airlift loop bioreactor	2016	10.2166/wst.2015.482	Article	English	21	Phujomjai Y., Somdee A., Somdee T.
872	Transition of diesel spray to a supercritical state under engine conditions	2016	10.1177/1468087415604281	Conference Paper	English	39	Wensing M., Vogel T., Götz G.
873	Chemical dispersants can suppress the activity of natural oil-degrading microorganisms	2015	10.1073/pnas.1507380112	Article	English	201	Kleindienst S., Seidel M., Ziervogel K., Grim S., Loftis K., Harrison S., Malkin S.Y., Perkins M.J., Field J., Sogin M.L., Dittmar T., Passow U., Medeiros P.M., Joye S.B.
874	Ciliated protists from the nepheloid layer and water column of sites affected by the Deepwater Horizon oil spill in the Northeastern Gulf of Mexico	2015	10.1016/j.dsr.2015.10.001	Article	English	13	Moss J.A., McCurry C., Tominack S., Romero I.C., Hollander D., Jeffrey W.H., Snyder R.A.
875	Natural guided genome engineering reveals transcriptional regulators controlling quorum-sensing signal degradation	2015	10.1371/journal.pone.0141718	Article	English	4	El Sahili A., Kwasiborski A., Mothe N., Velours C., Legrand P., Moréra S., Faure D.
876	Crude oil as a microbial seed bank with unexpected functional potentials	2015	10.1038/srep16057	Article	English	44	Cai M., Nie Y., Chi C.-Q., Tang Y.-Q., Li Y., Wang X.-B., Liu Z.-S., Yang Y., Zhou J., Wu X.-L.
877	Temperature affects c-di-GMP signalling and biofilm formation in Vibrio cholerae	2015	10.1111/1462-2920.12799	Article	English	65	Townsley L., Yildiz F.H.
878	The importance of hydrothermal venting to water-column secondary production in the northeast Pacific	2015	10.1016/j.dsr2.2015.04.014	Article	English	12	Burd B.J., Thomson R.E.
879	Application of biosurfactant produced by Ochrobactrum intermedium CN3 for enhancing petroleum sludge bioremediation	2015	10.1016/j.procbio.2015.07.002	Article	English	61	Bezza F.A., Beukes M., Chirwa E.M.N.
880	Investigating physiological, cellular and molecular effects in juvenile blue crab, Callinectus sapidus, exposed to field-collected sediments contaminated by oil from the Deepwater Horizon Incident	2015	10.1016/j.scitotenv.2015.06.022	Article	English	12	Pie H.V., Schott E.J., Mitchelmore C.L.
881	Genome sequence of the Thermotoga thermarum type strain (LA3T) from an African solfataric spring	2015	10.4056/sigs.3016383	Article	English	5	Göker M., Spring S., Scheuner C., Anderson I., Zeytun A., Nolan M., Lucas S., Tice H., Del Rio T.G., Cheng J.-F., Han C., Tapia R., Goodwin L.A., Pitluck S., Liolios K., Mavromatis K., Pagani I., Ivanova N., Mikhailova N., Pati A., Chen A., Palaniappan K., Land M., Hauser L., Chang Y., Jeffries C.D., Rohde M., Detter J.C., Woyke T., Bristow J., Eisen J.A., Markowitz V., Hugenholtz P., Kyrpides N.…
882	The molecular genetics of mycolic acid biosynthesis	2015	10.1128/9781555818845.ch29	Book Chapter	English	2	Pawełczyk J., Kremer L.
883	Profiling microbial community structures across six large oilfields in China and the potential role of dominant microorganisms in bioremediation	2015	10.1007/s00253-015-6748-1	Article	English	31	Sun W., Li J., Jiang L., Sun Z., Fu M., Peng X.
884	Metabolism-Induced CaCO3 Biomineralization during Reactive Transport in a Micromodel: Implications for Porosity Alteration	2015	10.1021/acs.est.5b00152	Article	English	30	Singh R., Yoon H., Sanford R.A., Katz L., Fouke B.W., Werth C.J.
885	Reliable method for the determination of surfactant retention in porous media during chemical flooding oil recovery	2015	10.1016/j.fuel.2015.05.013	Article	English	28	Kamari A., Sattari M., Mohammadi A.H., Ramjugernath D.
886	Evaluation of microbial transport during aerobic bioaugmentation of an RDX-contaminated aquifer	2015	10.1007/s10532-015-9746-1	Article	English	16	Crocker F.H., Indest K.J., Jung C.M., Hancock D.E., Fuller M.E., Hatzinger P.B., Vainberg S., Istok J.D., Wilson E., Michalsen M.M.
887	Terrisporobacter petrolearius sp. Nov., isolated from an oilfield petroleum reservoir	2015	10.1099/ijsem.0.000450	Article	English	36	Deng Y., Guo X., Wang Y., He M., Ma K., Wang H., Chen X., Kong D., Yang Z., Ruan Z.
888	Isolation and characterization of a crude oil degrading bacteria from formation water: comparative genomic analysis of environmental Ochrobactrum intermedium isolate versus clinical strains	2015	10.1631/jzus.b1500029	Article	English	8	Chai L.-J., Jiang X.-W., Zhang F., Zheng B.-W., Shu F.-C., Wang Z.-L., Cui Q.-F., Dong H.-P., Zhang Z.-Z., Hou D.-J., She Y.-H.
889	Complete genome sequence of the petroleum-emulsifying bacterium Pseudomonas stutzeri SLG510A3-8	2015	10.1016/j.jbiotec.2015.06.421	Article	English	9	Hu B., Nie Y., Geng S., Wu X.-L.
890	Interspecies interactions result in enhanced biofilm formation by co-cultures of bacteria isolated from a food processing environment	2015	10.1016/j.fm.2015.04.008	Article	English	66	Røder H.L., Raghupathi P.K., Herschend J., Brejnrod A., Knøchel S., Sørensen S.J., Burmølle M.
891	Acetoclastic methanogenesis is likely the dominant biochemical pathway of palmitate degradation in the presence of sulfate	2015	10.1007/s00253-015-6669-z	Article	English	11	Lv L., Mbadinga S.M., Wang L.-Y., Liu J.-F., Gu J.-D., Mu B.-Z., Yang S.-Z.
892	Comparative analysis of metagenomes from three methanogenic hydrocarbon-degrading enrichment cultures with 41 environmental samples	2015	10.1038/ismej.2015.22	Article	English	63	Tan B., Jane Fowler S., Laban N.A., Dong X., Sensen C.W., Foght J., Gieg L.M.
893	Functional divergence of Hsp90 genetic interactions in biofilm and planktonic cellular states	2015	10.1371/journal.pone.0137947	Article	English	12	Diezmann S., Leach M.D., Cowen L.E.
894	Production and applications of lipopeptide biosurfactant for bioremediation and oil recovery by Bacillus subtilis CN2	2015	10.1016/j.bej.2015.05.007	Article	English	131	Bezza F.A., Chirwa E.M.N.
895	Mechanisms of echinocandin antifungal drug resistance	2015	10.1111/nyas.12831	Article	English	161	Perlin D.S.
896	A smooth model for the estimation of gas/vapor viscosity of hydrocarbon fluids	2015	10.1016/j.jngse.2015.07.045	Article	English	43	Hajirezaie S., Hemmati-Sarapardeh A., Mohammadi A.H., Pournik M., Kamari A.
897	Osteoblastic mesenchymal stem cell sheet combined with Choukroun platelet-rich fibrin induces bone formation at an ectopic site	2015	10.1002/jbm.b.33288	Article	English	34	Wang Z., Weng Y., Lu S., Zong C., Qiu J., Liu Y., Liu B.
898	Rapid method to estimate the minimum miscibility pressure (MMP) in live reservoir oil systems during CO2 flooding	2015	10.1016/j.fuel.2015.02.087	Article	English	74	Kamari A., Arabloo M., Shokrollahi A., Gharagheizi F., Mohammadi A.H.
899	Enhanced microbial coalbed methane generation: A review of research, commercial activity, and remaining challenges	2015	10.1016/j.coal.2015.04.013	Review	English	186	Ritter D., Vinson D., Barnhart E., Akob D.M., Fields M.W., Cunningham A.B., Orem W., McIntosh J.C.
900	Surfactin from Bacillus subtilis displays an unexpected anti-Legionella activity	2015	10.1007/s00253-014-6317-z	Article	English	51	Loiseau C., Schlusselhuber M., Bigot R., Bertaux J., Berjeaud J.-M., Verdon J.
901	Oleiagrimonas soli gen. nov., sp. nov., a genome-sequenced gammaproteobacterium isolated from an oilfield	2015	10.1099/ijs.0.000158	Article	English	6	Fang T., Wang H., Huang Y., Zhou H., Dong P.
902	Profiling of Indigenous Microbial Community Dynamics and Metabolic Activity During Enrichment in Molasses-Supplemented Crude Oil-Brine Mixtures for Improved Understanding of Microbial Enhanced Oil Recovery	2015	10.1007/s12010-015-1626-y	Article	English	8	Halim A.Y., Pedersen D.S., Nielsen S.M., Lantz A.E.
903	Distribution of petroleum degrading genes and factor analysis of petroleum contaminated soil from the Dagang Oilfield, China	2015	10.1038/srep11068	Article	English	51	Liu Q., Tang J., Bai Z., Hecker M., Giesy J.P.
904	Staying in the zone: Offshore drillers' situation awareness	2015	10.1177/0018720814562643	Article	English	27	Roberts R., Flin R., Cleland J.
905	Methanogenic archaea in marcellus shale: A possible mechanism for enhanced gas recovery in unconventional shale resources	2015	10.1021/acs.est.5b00765	Article	English	12	Tucker Y.T., Kotcon J., Mroz T.
906	Defluviimonas alba sp. nov., isolated from an oilfield	2015	10.1099/ijs.0.000181	Article	English	14	Pan X.-C., Geng S., Lv X.-L., Mei R., Jiangyang J.-H., Wang Y.-N., Xu L., Liu X.-Y., Tang Y.-Q., Wang G.-J., Wu X.-L.
907	Microbial communities inhabiting oil-contaminated soils from two major oilfields in Northern China: Implications for active petroleum-degrading capacity	2015	10.1007/s12275-015-5023-6	Article	English	31	Sun W., Dong Y., Gao P., Fu M., Ta K., Li J.
908	Identification of Hydrocarbon-Oxidizing Dietzia Bacteria from Petroleum Reservoirs Based on Phenotypic Properties and Analysis of the 16S rRNA and gyrB Genes	2015	10.7868/s0026365615030143	Article	Russian	1	Nazina T.N., Shumkova E.S., Sokolova D.Sh., Babich T.L., Zhurina M.V., Xue Y.-F., Osipov G.A., Poltaraus A.B., Tourova T.P.
909	Plastorhodobacter daqingensis gen. nov., sp. nov.: A non-phototrophic bacterium isolated from daqing oilfield	2015	10.1007/s00284-014-0769-3	Article	English	1	Xie B.-S., Lv X.-L., Cai M., Tang Y.-Q., Wang Y.-N., Cui H.-L., Liu X.-Y., Tan Y., Wu X.-L.
910	Experimental Study of Borehole Logs for Oil and Gas Exploration	2015	10.1109/waina.2015.24	Conference Paper	English	0	Imran S., Khan N.
911	Analysis of bacterial and archaeal communities along a high-molecular-weight polyacrylamide transportation pipeline system in an oil field	2015	10.3390/ijms16047445	Article	English	17	Li C.-Y., Li J.-Y., Mbadinga S.M., Liu J.-F., Gu J.-D., Mu B.-Z.
912	Influence of low salinity stress on virulence and biofilm formation potential in Vibrio alginolyticus, isolated from the Gulf of Khambhat, Gujarat India	2015	10.1051/alr/2016004	Article	English	6	Dayma P., Raval I.H., Joshi N., Patel N.P., Haldar S., Mody K.H.
913	Microbial diversity and abundance in the Xinjiang Luliang long-term water-flooding petroleum reservoir	2015	10.1002/mbo3.241	Article	English	75	Gao P., Tian H., Li G., Sun H., Ma T.
914	Marinobacter shengliensis sp. nov., a moderately halophilic bacterium isolated from oil-contaminated saline soil	2015	10.1007/s10482-015-0401-y	Article	English	19	Luo Y.-J., Xie B.-S., Lv X.-L., Cai M., Wang Y.-N., Cui H.-L., Cai H., Wu X.-L.
915	Human Serum Potentiates the Expression of Genes Associated with Antifungal Drug Resistance in C. albicans Biofilms on Central Venous Catheters	2015	10.1007/s11046-014-9848-z	Article	English	5	Samaranayake L.P., Anil S., Hashem M., Vellappally S., Cheung B.P.K.
916	Dorsomedial hindbrain catecholamine regulation of hypothalamic astrocyte glycogen metabolic enzyme protein expression: Impact of estradiol	2015	10.1016/j.neuroscience.2015.02.019	Article	English	11	Tamrakar P., Shrestha P.K., Briski K.P.
917	Potential of viscosity reducing thermophillic anaerobic bacterial consortium TERIB#90 in upgrading heavy oil	2015	10.1016/j.fuel.2014.12.003	Article	English	16	Lavania M., Cheema S., Lal B.
918	A PAH-degrading strain JI 2 and its biodegradation potential ability	2015	10.11949/j.issn.0438-1157.20141365	Article	Chinese	2	Qi Y., Li H., Cao M., Cui Q., Yu L., Dong H.
919	Marine microbes rapidly adapt to consume ethane, propane, and butane within the dissolved hydrocarbon plume of a natural seep	2015	10.1002/2014jc010362	Article	English	7	Mendes S.D., Redmond M.C., Voigritter K., Perez C., Scarlett R., Valentine D.L.
920	High quality genome sequence and description of enterobacter mori strain 5–4, isolated from a mixture of formation water and crude-oil	2015	10.1186/1944-3277-10-9	Article	English	5	Zhang F., Su S., Yu G., Zheng B., Shu F., Wang Z., Xiang T., Dong H., Zhang Z., Hou D., She Y.
921	Towards the interactive transcription of handwritings: anytime anywhere document analysis	2015	10.1007/s10032-014-0234-7	Article	English	1	Gottfried B., Wegner M., Lawo M.
922	Negadavirga shengliensis gen. nov., sp. nov., a novel member of the family Cyclobacteriaceae isolated from oil-contaminated saline soil	2015	10.1007/s10482-014-0361-7	Article	English	5	Hu B., Yang Q., Cai M., Tang Y.-Q., Zhao G.-F., Wu X.-L.
923	Age and gender specific biokinetic model for strontium in humans	2015	10.1088/0952-4746/35/1/87	Article	English	25	Shagina N.B., Tolstykh E.I., Degteva M.O., Anspaugh L.R., Napier B.A.
924	Improving surface and transport properties of macroporous hydrogels for bone regeneration	2015	10.1002/jbm.a.35246	Article	English	9	Guarino V., Galizia M., Alvarez-Perez M., Mensitieri G., Ambrosio L.
925	Crude oil degradation by bacterial consortia under four different redox and temperature conditions	2015	10.1007/s00253-014-6042-7	Article	English	10	Xiong S., Li X., Chen J., Zhao L., Zhang H., Zhang X.
926	Heterologous production of Pseudomonas aeruginosa rhamnolipid under anaerobic conditions for microbial enhanced oil recovery	2015	10.1111/jam.12698	Article	English	43	Zhao F., Shi R., Zhao J., Li G., Bai X., Han S., Zhang Y.
927	Detection of airborne bacteria in a duck production facility with two different personal air sampling devices for an exposure assessment	2015	10.1080/15459624.2014.946514	Article	English	5	Martin E., Dziurowitz N., Jäckel U., Schäfer J.
928	Code blue: Acinetobacter baumannii, a nosocomial pathogen with a role in the oral cavity	2015	10.1111/omi.12072	Article	English	37	Richards A.M., Abu Kwaik Y., Lamont R.J.
929	Independence of nitrate and nitrite inhibition of Desulfovibrio vulgaris Hildenborough and use of nitrite as a substrate for growth	2015	10.1021/es504484m	Article	English	15	Korte H.L., Saini A., Trotter V.V., Butland G.P., Arkin A.P., Wall J.D.
930	Water	2015	10.1002/9783527686063.ch10	Book Chapter	English	0	Zschiesche W., Humbeck K.
931	Mitigation of biogenic sulphide production by sulphate reducing bacteria in petroleum reservoir souring	2015	10.2118/178323-ms	Conference Paper	English	4	Immanuel O.M., Abu G.O., Stanley H.O.
932	Mapping of microbial habitats in organic-rich shale	2015	10.2118/178706-ms	Conference Paper	English	6	Buchwalter E., Swift A., Sheets J., Cole D., Prisk T., Anovitz L., Ilavsky J., Rivers M., Welch S., Chipera S.
933	Biosurfactant production from Palm Oil Mill Effluent (POME) for applications as oil field chemical in Nigeria	2015	10.2118/178315-ms	Conference Paper	English	4	Hope N., Gideon A.
934	Detection and sampling methods for isolation of Candida spp. from oral cavities in diabetics and non-diabetics	2015	10.1590/1807-3107bor-2015.vol29.0077	Article	English	6	Petrović S.M., Cimbaljević M., Radunović M., Pfićer J.K., Jotić A., Pucar A.
935	Bioinformatics comparison of sulfate-reducing metabolism nucleotide sequences	2015	10.1117/12.2188390	Conference Paper	English	0	Tremberger G., Dehipawala S., Nguyen A., Cheung E., Sullivan R., Holden T., Lieberman D., Cheung T.
936	Efficiency and mechanism of oil displacement by a strain of Geobacillus stear other mophilus	2015	10.3724/sp.j.1145.2015.04053	Article	Chinese	1	Cao Y., Liu T., Li C., Hu J., Ba Y., Wu X.
937	Influences of microbial community structures and diversity changes by nutrients injection in Shengli oilfield, China	2015	10.1016/j.petrol.2015.06.020	Article	English	11	Xingbiao W., Yanfen X., Sanqing Y., Zhiyong H., Yanhe M.
938	High-up: A remote reservoir of microbial extremophiles in central Andean Wetlands	2015	10.3389/fmicb.2015.01404	Review	English	46	Albarracín V.H., Kurth D., Ordoñez O.F., Belfiore C., Luccini E., Salum G.M., Piacentini R.D., Farías M.E.
939	Water and biofuels	2015	10.1017/cbo9781139248792.007	Book Chapter	English	5	Marta A.D., Orlando F., Mancini M., Orlandini S.
940	A Post-Genomic View of the Ecophysiology, Catabolism and Biotechnological Relevance of Sulphate-Reducing Prokaryotes	2015	10.1016/bs.ampbs.2015.05.002	Book Chapter	English	186	Rabus R., Venceslau S.S., Wöhlbrand L., Voordouw G., Wall J.D., Pereira I.A.C.
941	Hydrocarbon degradation by a newly isolated thermophilic Anoxybacillus sp. with bioemulsifier production and new alkB genes	2015	10.1039/c5ra17137g	Article	English	13	Xia W., Dong H., Zheng C., Cui Q., He P., Tang Y.
942	Biostimulation of biogas producing microcosm for enhancing oil recovery in low-permeability oil reservoir	2015	10.1039/c5ra18089a	Article	English	8	Dong H., Zhang Z.Z., He Y.L., Luo Y.J., Xia W.J., Sun S.S., Zhang G.Q., Zhang Z.Y., Gao D.L.
943	Polyhydroxyalkanoates: Much More than Biodegradable Plastics	2015	10.1016/bs.aambs.2015.06.001	Article	English	48	López N.I., Pettinari M.J., Nikel P.I., Méndez B.S.
944	Characteristics of newly isolated Geobacillus sp. ZY-10 degrading hydrocarbons in crude oil	2015	10.5604/01.3001.0009.2120	Article	English	7	Sun Y., Ning Z., Yang F., Li X.
945	High-throughput functional screening reveals low frequency of antibiotic resistance genes in DNA recovered from the Upper Mississippi River	2015	10.2166/wh.2014.215	Article	English	8	Staley C., Gould T.J., Wang P., Phillips J., Cotner J.B., Sadowsky M.J.
946	Advances in tools to monitor souring and corrosion in oil and gas fields	2015	10.2118/173805-ms	Conference Paper	English	2	An A., An D., Elliott A., Menon P., Shen Y., Voordouw G., Cote D.E., Miner K.
947	The demographic determinants of human microbiome health	2015	10.1016/j.tim.2014.11.005	Review	English	16	Estrela S., Whiteley M., Brown S.P.
948	Rapid method for the determination of solution gas-oil ratios of petroleum reservoir fluids	2015	10.1016/j.jngse.2015.03.022	Article	English	18	Baniasadi H., Kamari A., Heidararabi S., Mohammadi A.H., Hemmati-Sarapardeh A.
949	Flaxseed oil containing -linolenic acid ester of plant sterol improved atherosclerosis in apoe deficient mice	2015	10.1155/2015/958217	Article	English	22	Han H., Yan P., Chen L., Luo C., Gao H., Deng Q., Zheng M., Shi Y., Liu L.
950	Adhesion, biofilm formation, cell surface hydrophobicity, and antifungal planktonic susceptibility: Relationship among Candida spp.	2015	10.3389/fmicb.2015.00205	Article	English	127	Silva-Dias A., Miranda I.M., Branco J., Monteiro-Soares M., Pina-Vaz C., Rodrigues A.G.
951	Microbial methane formation in deep aquifers of a coal-bearing sedimentary basin, Germany	2015	10.3389/fmicb.2015.00200	Article	English	32	Gründger F., Jiménez N., Thielemann T., Straaten N., Lüders T., Richnow H.-H., Krüger M.
952	Glycocaulis alkaliphilus sp. nov., a dimorphic prosthecate bacterium isolated from crude oil	2015	10.1099/ijs.0.000023	Article	English	5	Geng S., Pan X.-C., Mei R., Wang Y.-N., Liu X.-Y., Wang X.-B., Tang Y.-Q., Wu X.-L.
953	Characteristics of hydrocarbon hydroxylase genes in a thermophilic aerobic biological system treating oily produced wastewater	2015	10.2166/wst.2014.470	Article	English	8	Liu R., Gao Y., Ji Y., Zhang Y., Yang M.
954	Iron corrosion induced by nonhydrogenotrophic nitrate-reducing Prolixibacter sp. strain MIC1-1	2015	10.1128/aem.03741-14	Article	English	56	Iino T., Ito K., Wakai S., Tsurumaru H., Ohkuma M., Harayama S.
955	A theoretical study on a novel solar based integrated system for simultaneous production of cooling and heating	2015	10.1016/j.ijrefrig.2014.12.013	Article	English	11	Khaliq A.
956	Diversity of methane-cycling archaea in hydrothermal sediment investigated by general and group-specific PCR primers	2015	10.1128/aem.03588-14	Article	English	37	Lever M.A., Teske A.P.
957	Halodurantibacterium flavum gen. nov. sp. nov. a Non-phototrophic Bacterium Isolated from an Oil Production Mixture	2015	10.1007/s00284-014-0696-3	Article	English	3	Lv X.-L., Xie B.-S., Cai M., Tang Y.-Q., Wang Y.-N., Cui H.-L., Liu X.-Y., Tan Y., Wu X.-L.
958	Oral Gram-negative anaerobic bacilli as a reservoir of β-lactam resistance genes facilitating infections with multiresistant bacteria	2015	10.1016/j.ijantimicag.2014.10.003	Review	English	23	Dupin C., Tamanai-Shacoori Z., Ehrmann E., Dupont A., Barloy-Hubler F., Bousarghin L., Bonnaure-Mallet M., Jolivet-Gougeon A.
959	Dynamic behavior of monopile supported offshore wind turbine system	2015	10.1201/b17435-160	Conference Paper	English	0	Bisoi S., Haldar S.
960	Evaluation of intraspecies interactions in biofilm formation by methylobacterium species isolated from pink-pigmented household biofilms	2014	10.1264/jsme2.me14038	Article	English	10	Xu F.-F., Morohoshi T., Wang W.-Z., Yamaguchi Y., Liang Y., Ikeda T.
961	Genome sequence of Brevibacillus agri strain 5-2, isolated from the formation water of petroleum reservoir	2014	10.1016/j.margen.2014.08.006	Article	English	6	She Y., Wu W., Hang C., Jiang X., Chai L., Yu G., Shu F., Wang Z., Su S., Xiang T., Zhang Z., Hou D., Zhang F., Zheng B.
962	Microbacterium petrolearium sp. nov., isolated from an oil-contaminated water sample	2014	10.1099/ijs.0.061119-0	Article	English	11	Wang H., Xiang T., Wang Y., Song J., Zhai Y., Chen X., Li Y., Zhao B., Zhao B., Ruan Z.
963	In-depth analyses of deep subsurface sediments using 454-pyrosequencing reveals a reservoir of buried fungal communities at record-breaking depths	2014	10.1111/1574-6941.12447	Article	English	34	Rédou V., Ciobanu M.C., Pachiadaki M.G., Edgcomb V., Alain K., Barbier G., Burgaud G.
964	16S rDNA-based metagenomic analysis of dental plaque and lung bacteria in patients with severe acute exacerbations of chronic obstructive pulmonary disease	2014	10.1111/jre.12159	Article	English	34	Tan L., Wang H., Li C., Pan Y.
965	Progressive degradation of crude oil n-alkanes coupled to methane production under mesophilic and thermophilic conditions	2014	10.1371/journal.pone.0113253	Article	English	52	Cheng L., Shi S., Li Q., Chen J., Zhang H., Lu Y.
966	Effects of CO2 enrichment on cockle shell growth interpreted with a Dynamic Energy Budget model	2014	10.1016/j.seares.2014.01.011	Article	English	26	Klok C., Wijsman J.W.M., Kaag K., Foekema E.
967	Improvement of lichenysin production in Bacillus licheniformis by replacement of native promoter of lichenysin biosynthesis operon and medium optimization	2014	10.1007/s00253-014-5978-y	Article	English	58	Qiu Y., Xiao F., Wei X., Wen Z., Chen S.
968	New tools to determine bubble point pressure of crude oils: Experimental and modeling study	2014	10.1016/j.petrol.2014.08.018	Article	English	40	Ahmadi M.A., Zendehboudi S., James L.A., Elkamel A., Dusseault M., Chatzis I., Lohi A.
969	Phylogenetic analysis of the microbial community in hypersaline petroleum produced water from the Campos Basin	2014	10.1007/s11356-014-3155-6	Article	English	10	Piubeli F., Grossman M.J., Fantinatti-Garboggini F., Durrant L.R.
970	Nitratireductor shengliensis sp. nov., Isolated from an Oil-Polluted Saline Soil	2014	10.1007/s00284-014-0624-6	Article	English	12	Pan X.-C., Geng S., Mei R., Wang Y.-N., Cai H., Liu X.-Y., Tang Y.-Q., Nie Y., Ye S.-Y., Wu X.-L.
971	Edible oils from microalgae: Insights in TAG accumulation	2014	10.1016/j.tibtech.2014.07.004	Review	English	151	Klok A.J., Lamers P.P., Martens D.E., Draaisma R.B., Wijffels R.H.
972	Pseudomonas aeruginosa adaptation in the nasopharyngeal reservoir leads to migration and persistence in the lungs	2014	10.1038/ncomms5780	Article	English	55	Fothergill J.L., Neill D.R., Loman N., Winstanley C., Kadioglu A.
973	Corrosion of Iron by Iodide-Oxidizing Bacteria Isolated from Brine in an Iodine Production Facility	2014	10.1007/s00248-014-0438-x	Article	English	24	Wakai S., Ito K., Iino T., Tomoe Y., Mori K., Harayama S.
974	Molecular characterization of bacterial communities associated with sediments in the Laurentian Great Lakes	2014	10.1016/j.jglr.2014.04.008	Article	English	16	Winters A.D., Marsh T.L., Brenden T.O., Faisal M.
975	Glycocaulis albus sp. nov., A moderately halophilic dimorphic prosthecate bacterium isolated from petroleum-contaminated saline soil	2014	10.1099/ijs.0.063537-0	Article	English	11	Lv X.-L., Xie B.-S., Cai M., Geng S., Tang Y.-Q., Wang Y.-N., Cui H.-L., Liu X.-Y., Ye S.-Y., Wu X.-L.
976	Methods for biofilm constituents and turnover	2014	10.1002/9781118336144.ch5	Book Chapter	English	2	Bridier A., Dubois-Brissonnet F., Briandet R., Cox C.E., Zaragoza W.J., Krediet C.J., Teplitski M.
977	Water droplets in oil are microhabitats for microbial life	2014	10.1126/science.1252215	Article	English	99	Meckenstock R.U., Von Netzer F., Stumpp C., Lueders T., Himmelberg A.M., Hertkorn N., Schmitt-Kopplin P., Harir M., Hosein R., Haque S., Schulze-Makuch D.
978	Proteome analysis of the inner integument from developing jatropha curcas L. seeds	2014	10.1021/pr5004505	Article	English	15	Soares E.L., Shah M., Soares A.A., Costa J.H., Carvalho P., Domont G.B., Nogueira F.C.S., Campos F.A.P.
979	Genomics and proteomics provide new insight into the commensal and pathogenic lifestyles of bovine- and human-associated staphylococcus epidermidis strains	2014	10.1021/pr500322d	Article	English	13	Savijoki K., Iivanainen A., Siljamäki P., Laine P.K., Paulin L., Karonen T., Pyörälä S., Kankainen M., Nyman T.A., Salomäki T., Koskinen P., Holm L., Simojoki H., Taponen S., Sukura A., Kalkkinen N., Auvinen P., Varmanen P.
980	Beta- lactam antibiotics stimulate biofilm formation in non-typeable Haemophilus influenzae by up-regulating carbohydrate metabolism	2014	10.1371/journal.pone.0099204	Article	English	36	Wu S., Li X., Gunawardana M., Maguire K., Guerrero-Given D., Schaudinn C., Wang C., Baum M.M., Webster P.
981	Relationships between water and gas chemistry in mature coalbed methane reservoirs of the Black Warrior Basin	2014	10.1016/j.coal.2013.10.002	Article	English	67	Pashin J.C., McIntyre-Redden M.R., Mann S.D., Kopaska-Merkel D.C., Varonka M., Orem W.
982	Microbial abundance and community composition influence production performance in a low-temperature petroleum reservoir	2014	10.1021/es500239w	Article	English	46	Li G., Gao P., Wu Y., Tian H., Dai X., Wang Y., Cui Q., Zhang H., Pan X., Dong H., Ma T.
983	Modification of rock/fluid and fluid/fluid interfaces during MEOR processes, using two biosurfactant producing strains of Bacillus stearothermophilus SUCPM#14 and Enterobacter cloacae: A mechanistic study	2014	10.1016/j.colsurfb.2013.12.002	Article	English	19	Sarafzadeh P., Zeinolabedini Hezave A., Mohammadi S., Niazi A., Ayatollahi S.
984	Remediating Oilfield Waste and Spills	2014	10.1002/9781118825662.ch6	Book Chapter	English	0	Farinato R.S.
985	Safety and immunogenicity of a Mycoplasma ovipneumoniae bacterin for domestic sheep (Ovis aries)	2014	10.1371/journal.pone.0095698	Article	English	28	Ziegler J.C., Lahmers K.K., Barrington G.M., Parish S.M., Kilzer K., Baker K., Besser T.E.
986	Gene expression profiling and identification of resistance genes to low temperature in leaves of peanut (Arachis hypogaea L.)	2014	10.1016/j.scienta.2014.01.043	Article	English	9	Chen N., Yang Q., Hu D., Pan L., Chi X., Chen M., Yang Z., Wang T., Wang M., He Y., Yu S.
987	Ketamine and the metabolite norketamine: Persistence and phototransformation toxicity in hospital wastewater and surface water	2014	10.1016/j.watres.2014.01.022	Article	English	51	Lin A.Y.C., Lee W.-N., Wang X.-H.
988	Biohydrogen production by Thermoanaerobacterium thermosaccharolyticum TERI S7 from oil reservoir flow pipeline	2014	10.1016/j.ijhydene.2013.12.179	Article	English	42	Singh S., Sarma P.M., Lal B.
989	Application of polycolloid-releasing substrate to remediate trichloroethylene-contaminated groundwater: A pilot-scale study	2014	10.1016/j.jhazmat.2014.01.004	Article	English	25	Tsai T.T., Liu J.K., Chang Y.M., Chen K.F., Kao C.M.
990	A microbial-enhanced oil recovery trial in Huabei Oilfield in China	2014	10.1080/10916466.2010.497788	Article	English	9	Huang L., Yu L., Luo Z., Song S., Bo H., Zheng C.
991	New hydrocarbon degradation pathways in the microbial metagenome from brazilian petroleum reservoirs	2014	10.1371/journal.pone.0090087	Article	English	70	Sierra-García I.N., Alvarez J.C., De Vasconcellos S.P., De Souza A.P., Dos Santos Neto E.V., De Oliveira V.M.
992	Arf1/COPI machinery acts directly on lipid droplets and enables their connection to the ER for protein targeting	2014	10.7554/elife.01607	Article	English	199	Wilfling F., Thiam A.R., Olarte M.-J., Wang J., Beck R., Gould T.J., Allgeyer E.S., Pincet F., Bewersdorf J., Farese Jr. R.V., Walther T.C.
993	Diverse bacteria isolated from microtherm oil-production water	2014	10.1007/s10482-013-0088-x	Article	English	24	Sun J.-Q., Xu L., Zhang Z., Li Y., Tang Y.-Q., Wu X.-L.
994	Petroleum geochemistry of oil samples from shallow boreholes at Sakran site, western Iraq	2014	10.1007/s12517-012-0813-1	Article	English	6	Al-Rawi F.R., Al-Ameri T.K., Awadh S.M.
995	The microbial communities in two apparently physically separated deep subsurface oil reservoirs show extensive DNA sequence similarities	2014	10.1111/1462-2920.12181	Article	English	39	Lewin A., Johansen J., Wentzel A., Kotlar H.K., Drabløs F., Valla S.
996	Dynamic processes of indigenous microorganisms from a low-temperature petroleum reservoir during nutrient stimulation	2014	10.1016/j.jbiosc.2013.07.009	Article	English	26	Gao P.-K., Li G.-Q., Zhao L.-X., Dai X.-C., Tian H.-M., Dai L.-B., Wang H.-B., Huang H.-D., Chen Y.-H., Ma T.
997	Incidence of virulence factors in enterococci from raw and fermented meat and biofilm forming capacity at 25°C and 37°C	2014	10.1016/j.ijfoodmicro.2013.11.002	Article	English	41	Jahan M., Holley R.A.
998	Communication and computation by bacteria compartmentalized within microemulsion droplets	2014	10.1021/ja411132w	Article	English	64	Weitz M., Mückl A., Kapsner K., Berg R., Meyer A., Simmel F.C.
999	Persistence of extracellular DNA in river sediment facilitates antibiotic resistance gene propagation	2014	10.1021/es404280v	Article	English	255	Mao D., Luo Y., Mathieu J., Wang Q., Feng L., Mu Q., Feng C., Alvarez P.J.J.
1000	Temperature and injection water source influence microbial community structure in four Alaskan North Slope hydrocarbon reservoirs	2014	10.3389/fmicb.2014.00409	Article	English	28	Piceno Y.M., Reid F.C., Tom L.M., Conrad M.E., Bill M., Hubbard C.G., Fouke B.W., Graff C.J., Han J., Stringfellow W.T., Hanlon J.S., Hu P., Hazen T.C., Andersen G.L.
1001	The removal of crude oil in waste drilling muds by a constructed microbial consortium	2014	10.1007/978-3-642-37922-2_134	Conference Paper	English	3	Chang Y., Wang X., Han Y., Wang M., Zheng C., Wang Y., Huang Z.
1002	Staphylococcus epidermidis pathogenesis	2014	10.1007/978-1-62703-736-5_2	Article	English	63	Otto M.
1003	Evaluation of a more environmentally sensitive approach to microbiological control programs for hydraulic fracturing operations in the marcellus shale using a nitrate-reducing bacteria and nitrate-based treatment system	2014	10.2118/170937-ms	Conference Paper	English	4	Corrin E., Harless M., Rodriguez C., Degner D., Archibeque R.
1004	A novel empirical equation for relative permeability in low permeability reservoirs	2014	10.1016/j.cjche.2014.09.031	Article	English	16	Ge Y., Li S., Qu K.
1005	Development of a microbial process for the recovery of petroleum oil from depleted reservoirs at 91-96°C	2014	10.1016/j.biortech.2014.03.109	Article	English	35	Arora P., Ranade D.R., Dhakephalkar P.K.
1006	A genomic region involved in the formation of adhesin fibers in Bacillus cereus biofilms	2014	10.3389/fmicb.2014.00745	Article	English	57	Caro-Astorga J., Pérez-García A., de Vicente A., Romero D.
1007	Experimental and numerical film cooling investigations in a GOX/ kerosene rocket combustion chamber	2014	10.2514/6.2014-4008	Conference Paper	English	0	Schlieben G., Kirchberger C., Haidn O.J., Höglauer C., Kniesner B., Knab O.
1008	Relevance of deep-subsurface microbiology for underground gas storage and geothermal energy production	2014	10.1007/10_2013_257	Article	English	15	Gniese C., Bombach P., Rakoczy J., Hoth N., Schlömann M., Richnow H.-H., Krüger M.
1009	Can indigenous bacteria be utilized for increasing oil recovery from trinidad oil reservoirs?	2014	10.2118/169946-ms	Conference Paper	English	0	Rambaran N., Maharaj S., Hosein R.
1010	Fe-oxide grain coatings support bacterial Fe-reducing metabolisms in 1.7-2.0 km-deep subsurface quartz arenite sandstone reservoirs of the Illinois Basin (USA)	2014	10.3389/fmicb.2014.00511	Article	English	13	Dong Y., Sanford R.A., Locke R.A., II, Cann I.K., Mackie R.I., Fouke B.W.
1011	Microbial redox processes in deep subsurface environments and the potential application of (per)chlorate in oil reservoirs	2014	10.3389/fmicb.2014.00428	Review	English	33	Liebensteiner M.G., Tsesmetzis N., Stams A.J.M., Lomans B.P.
1012	Halomonas sulfidaeris-dominated microbial community inhabits a 1.8 km-deep subsurface Cambrian sandstone reservoir	2014	10.1111/1462-2920.12325	Article	English	43	Dong Y., Kumar C.G., Chia N., Kim P.-J., Miller P.A., Price N.D., Cann I.K.O., Flynn T.M., Sanford R.A., Krapac I.G., Locke II R.A., Hong P.-Y., Tamaki H., Liu W.-T., Mackie R.I., Hernandez A.G., Wright C.L., Mikel M.A., Walker J.L., Sivaguru M., Fried G., Yannarell A.C., Fouke B.W.
1013	Exposure to arsenic alters the reproductive axis on offspring rats	2014	10.1201/b16767-201	Conference Paper	English	0	Bourguignon N.S., Rodríguez D., Bonaventura M.M., Lux Lantos V., Libertun C.
1014	Biofilm formation on biotic and abiotic surfaces in the presence of antimicrobials by Escherichia coli isolates from cases of bovine mastitis	2014	10.1128/aem.01953-14	Article	English	34	[No author name available]
1015	Genomovar assignment of Pseudomonas stutzeri populations inhabiting produced oil reservoirs	2014	10.1002/mbo3.179	Article	English	8	Zhang F., She Y.-H., Banat I.M., Chai L.-J., Huang L.-Q., Yi S.-J., Wang Z.-L., Dong H.-L., Hou D.-J.
1016	Identification and characterization of microbial biofilm communities associated with corroded oil pipeline surfaces	2014	10.1080/08927014.2014.931379	Article	English	73	Lenhart T.R., Duncan K.E., Beech I.B., Sunner J.A., Smith W., Bonifay V., Biri B., Suflita J.M.
1017	Changes in the deep subsurface microbial biosphere resulting from a field-scale CO2 geosequestration experiment	2014	10.3389/fmicb.2014.00209	Article	English	37	Mu A., Boreham C., Leong H.X., Haese R.R., Moreau J.W.
1018	Conversion of crude oil to methane by a microbial consortium enriched from oil reservoir production waters	2014	10.3389/fmicb.2014.00197	Article	English	81	Berdugo-Clavijo C., Gieg L.M.
1019	Natural oil slicks fuel surface water microbial activities in the northern Gulf of Mexico	2014	10.3389/fmicb.2014.00188	Article	English	23	Ziervogel K., D'souza N., Sweet J., Yan B., Passow U.
1020	Identification of genes specifically required for the anaerobic metabolism of benzene in Geobacter metallireducens	2014	10.3389/fmicb.2014.00245	Article	English	20	Zhang T., Tremblay P.-L., Chaurasia A.K., Smith J.A., Bain T.S., Lovley D.R.
1021	Methanogenic potential of a thermophilic consortium enriched from coal mine	2014	10.1016/j.ibiod.2014.05.022	Article	English	13	Lavania M., Cheema S., Sarma P.M., Ganapathi R., Lal B.
1022	Identification of genes induced in Vibrio cholerae in a dynamic biofilm system	2014	10.1016/j.ijmm.2014.05.011	Article	English	22	Seper A., Pressler K., Kariisa A., Haid A.G., Roier S., Leitner D.R., Reidl J., Tamayo R., Schild S.
1023	Ecological dynamics and biotechnological implications of thraustochytrids from marine habitats	2014	10.1007/s00253-014-5780-x	Review	English	39	Singh P., Liu Y., Li L., Wang G.
1024	Biodiesel production using chemical and biological methods - A review of process, catalyst, acyl acceptor, source and process variables	2014	10.1016/j.rser.2014.05.084	Review	English	115	Bharathiraja B., Chakravarthy M., Kumar R.R., Yuvaraj D., Jayamuthunagai J., Kumar R.P., Palani S.
1025	Bile acids and bicarbonate inversely regulate intracellular cyclic di-GMP in vibrio cholerae	2014	10.1128/iai.01664-14	Article	English	58	Koestler B.J., Waters C.M.
1026	Effect-directed analysis for estrogenic compounds in a fluvial sediment sample using transgenic cyp19a1b-GFP zebrafish embryos	2014	10.1016/j.aquatox.2014.05.016	Article	English	35	Fetter E., Krauss M., Brion F., Kah O., Scholz S., Brack W.
1027	Comparison of bacterial community in aqueous and oil phases of water-flooded petroleum reservoirs using pyrosequencing and clone library approaches	2014	10.1007/s00253-013-5472-y	Article	English	66	Wang L.-Y., Ke W.-J., Sun X.-B., Liu J.-F., Gu J.-D., Mu B.-Z.
1028	Petrotoga japonica sp. nov., a thermophilic, fermentative bacterium isolated from Yabase Oilfield in Japan	2014	10.1007/s00203-014-0972-4	Article	English	9	Purwasena I.A., Sugai Y., Sasaki K.
1029	Phylogenetic profiles of in-house microflora in drains at a food production facility: Comparison and biocontrol implications of listeria-positive and -negative bacterial populations	2014	10.1128/aem.00468-14	Article	English	35	Fox E.M., Solomon K., Moore J.E., Wall P.G., Fanning S.
1030	Genetic basis for nitrate resistance in Desulfovibrio strains	2014	10.3389/fmicb.2014.00153	Article	English	20	Korte H.L., Fels S.R., Christensen G.A., Price M.N., Kuehl J.V., Zane G.M., Deutschbauer A.M., Arkin A.P., Wall J.D.
1031	Functional gene diversity of oolitic sands from Great Bahama Bank	2014	10.1111/gbi.12079	Article	English	34	Diaz M.R., Van Norstrand J.D., Eberli G.P., Piggot A.M., Zhou J., Klaus J.S.
1032	The effect of corrosion inhibitors on microbial communities associated with corrosion in a model flow cell system	2014	10.1007/s00253-013-4906-x	Article	English	29	Duncan K.E., Perez-Ibarra B.M., Jenneman G., Harris J.B., Webb R., Sublette K.
1033	Lysosome/lipid droplet interplay in metabolic diseases	2014	10.1016/j.biochi.2013.07.008	Short Survey	English	31	Dugail I.
1034	Isolation and characterization of crude-oil-degrading bacteria from oil-water mixture in Dagang oilfield, China	2014	10.1016/j.ibiod.2013.11.005	Article	English	42	Liu H., Yao J., Yuan Z., Shang Y., Chen H., Wang F., Masakorala K., Yu C., Cai M., Blake R.E., Choi M.M.F.
1035	Biotechnology in the petroleum industry: An overview	2014	10.1016/j.ibiod.2013.09.011	Review	English	152	Bachmann R.T., Johnson A.C., Edyvean R.G.J.
1036	Isolation and characterization of a novel phenanthrene (PHE) degrading strain Psuedomonas sp. USTB-RU from petroleum contaminated soil	2013	10.1016/j.jhazmat.2013.10.007	Article	English	48	Masakorala K., Yao J., Cai M., Chandankere R., Yuan H., Chen H.
1037	Computation of reservoir relative permeability curve based on RBF neural network	2013	10.3969/j.issn.0438-1157.2013.12.045	Article	Chinese	9	Ge Y., Li S.
1038	High-level expression of glutaryl-7-aminocephalosporanic acid acylase from Pseudomonas diminuta NK703 in Escherichia coli by combined optimization strategies	2013	10.1016/j.jbiotec.2013.08.024	Article	English	15	Ma X., Su E., Zhu Y., Deng S., Wei D.
1039	Anaerobic biodegradation of the isoprenoid biomarkers pristane and phytane	2013	10.1016/j.orggeochem.2013.10.010	Article	English	24	Dawson K.S., Schaperdoth I., Freeman K.H., Macalady J.L.
1040	Patient-specific analysis of periodontal and peri-implant microbiomes	2013	10.1177/0022034513504950	Article	English	129	Dabdoub S.M., Tsigarida A.A., Kumar P.S.
1041	A laboratory study for assessing microbial enhanced oil recovery	2013	10.1080/15567036.2010.492380	Article	English	9	Bao M., Liu T., Chen Z., Guo L., Jiang G., Li Y., Li X.
1042	Genome sequence of the moderately thermophilic sulfur-reducing bacterium Thermanaerovibrio velox type strain (Z-9701T) and emended description of the genus Thermanaerovibrio	2013	10.4056/sigs.4237901	Article	English	3	Palaniappan K., Meier-Kolthoff J.P., Teshima H., Nolan M., Lapidus A., Tice H., Del Rio T.G., Cheng J.-F., Han C., Tapia R., Goodwin L.A., Pitluck S., Liolios K., Mavromatis K., Pagani I., Ivanova N., Mikhailova N., Pati A., Chen A., Rohde M., Mayilraj S., Spring S., Detter J.C., Göker M., Bristow J., Eisen J.A., Markowitz V., Hugenholtz P., Kyrpides N.C., Klenk H.-P., Woyke T.
1043	The order halanaerobiales, and the families halanaerobiaceae and halobacteroidaceae	2013	10.1007/978-3-642-30120-9_218	Book Chapter	English	22	Oren A.
1044	Microbial corrosion in linepipe steel under the influence of a sulfate-reducing consortium isolated from an oil field	2013	10.1007/s11665-013-0627-7	Article	English	54	Alabbas F.M., Williamson C., Bhola S.M., Spear J.R., Olson D.L., Mishra B., Kakpovbia A.E.
1045	Mechanism of crude oil viscosity reduction by two thermophilic hydrocarbon-degrading bacteria	2013	10.3969/j.issn.0438-1157.2013.11.048	Article	Chinese	5	Gao P., Wang Y., Zhang H., Pan X., Li G., Ma T.
1046	New insights into the molecular mechanism of intestinal fatty acid absorption	2013	10.1111/eci.12161	Review	English	139	Wang T.Y., Liu M., Portincasa P., Wang D.Q.-H.
1047	Microbial methanogenesis in subsurface oil and coal	2013	10.1016/j.resmic.2013.07.004	Article	English	83	Meslé M., Dromart G., Oger P.
1048	Isolation and characterization of a strain of pseudomonas stutzeri for coal biodesulfurization	2013	10.4028/www.scientific.net/amr.726-731.2403	Conference Paper	English	2	Yang Y., Ren G.M., Liu C.Y., Yang L.
1049	Experimental study on transcritical spray of liquid aviation kerosene	2013	10.1615/atomizspr.2013007793	Article	English	3	Song H., Fan W., Fan Z., Jin L.
1050	Metabolic	2013	10.1007/978-3-642-35579-0_3	Book Chapter	English	2	Guglielmi G., Diano D., Ponti F., Nasuto M., Bazzocchi A.
1051	Geochemical behaviors and genesis of formation water in 8th Member of Xiashihezi Formation in western Sulige gas field, Ordos Basin	2013	10.11743/ogg20130507	Article	Chinese	18	Liang J., Li R., Chen Y.
1052	The shielding effect of wild type iron reducing bacterial flora on the corrosion of linepipe steel	2013	10.1016/j.engfailanal.2013.05.020	Article	English	38	AlAbbas F.M., Bhola S.M., Spear J.R., Olson D.L., Mishra B.
1053	Bioactive volatile organic compounds from Antarctic (sponges) bacteria	2013	10.1016/j.nbt.2013.03.011	Article	English	54	Papaleo M.C., Romoli R., Bartolucci G., Maida I., Perrin E., Fondi M., Orlandini V., Mengoni A., Emiliani G., Tutino M.L., Parrilli E., de Pascale D., Michaud L., Lo Giudice A., Fani R.
1054	Widespread occurrence of bacterial human virulence determinants in soil and freshwater environments	2013	10.1128/aem.01633-13	Article	English	20	Soborg D.A., Hendriksen N.B., Kilian M., Kroer N.
1055	Metagenomics of hydrocarbon resource environments indicates aerobic taxa and genes to be unexpectedly common	2013	10.1021/es4020184	Article	English	130	An D., Caffrey S.M., Soh J., Agrawal A., Brown D., Budwill K., Dong X., Dunfield P.F., Foght J., Gieg L.M., Hallam S.J., Hanson N.W., He Z., Jack T.R., Klassen J., Konwar K.M., Kuatsjah E., Li C., Larter S., Leopatra V., Nesbø C.L., Oldenburg T., Pagé A.P., Ramos-Padron E., Rochman F.F., Saidi-Mehrabad A., Sensen C.W., Sipahimalani P., Song Y.C., Wilson S., Wolbring G., Wong M.-L., Voordouw G.
1056	Bacterial community structure in cooling water and biofilm in an industrial recirculating cooling water system	2013	10.2166/wst.2013.334	Article	English	21	Wang J., Liu M., Xiao H., Wu W., Xie M., Sun M., Zhu C., Li P.
1057	Shifts in the Microbial Community Composition of Gulf Coast Beaches Following Beach Oiling	2013	10.1371/journal.pone.0074265	Article	English	62	Newton R.J., Huse S.M., Morrison H.G., Peake C.S., Sogin M.L., McLellan S.L.
1058	Evaluation of microbial community composition in thermophilic methane-producing incubation of production water from a high-temperature oil reservoir	2013	10.1080/09593330.2013.786135	Article	English	12	Zhou F., Mbadinga S.M., Liu J.-F., Gu J.-D., Mu B.-Z.
1059	Fevillea trilobata as a natural host of Zucchini yellow mosaic virus in Brazil	2013	10.1094/pdis-04-13-0351-pdn	Article	English	1	Boiteux L.S., Spadotti D.M.A., Rezende J.A.M., Kitajima E.W.
1060	Livestock-Associated Methicillin-Resistant Staphylococcus aureus (LA-MRSA) Isolates of Swine Origin Form Robust Biofilms	2013	10.1371/journal.pone.0073376	Article	English	14	Nicholson T.L., Shore S.M., Smith T.C., Fraena T.S.
1061	Timing of biogenic gas formation in the eastern Qaidam Basin, NW China	2013	10.1016/j.chemgeo.2013.06.001	Article	English	19	Zhang S., Shuai Y., Huang L., Wang L., Su J., Huang H., Ma D., Li M.
1062	Identification and significance of Naegleria fowleri isolated from the hot spring which related to the first primary amebic meningoencephalitis (PAM) patient in Taiwan	2013	10.1016/j.ijpara.2013.01.012	Article	English	37	Tung M.-C., Hsu B.-M., Tao C.-W., Lin W.-C., Tsai H.-F., Ji D.-D., Shen S.-M., Chen J.-S., Shih F.-C., Huang Y.-L.
1063	Utilization of biodiesel derived crude glycerol by fungal isolates for biomass and single cell oil production	2013	10.1166/jbmb.2013.1367	Article	English	5	Marchand K., Lubitz W.D., Nicol R.W.
1064	The emerging world of the fungal microbiome	2013	10.1016/j.tim.2013.04.002	Review	English	346	Huffnagle G.B., Noverr M.C.
1065	DNA-SIP Reveals That Syntrophaceae Play an Important Role in Methanogenic Hexadecane Degradation	2013	10.1371/journal.pone.0066784	Article	English	53	Cheng L., Ding C., Li Q., He Q., Dai L.-R., Zhang H.
1066	Core flooding tests to investigate the effects of IFT reduction and wettability alteration on oil recovery during MEOR process in an Iranian oil reservoir	2013	10.1007/s00253-013-4863-4	Article	English	72	Rabiei A., Sharifinik M., Niazi A., Hashemi A., Ayatollahi S.
1067	In-situ lipopeptide biosurfactant production by Bacillus strains correlates with improved oil recovery in two oil wells approaching their economic limit of production	2013	10.1016/j.ibiod.2012.05.010	Article	English	82	Youssef N., Simpson D.R., McInerney M.J., Duncan K.E.
1068	Functional and phylogenetic microbial diversity in formation waters of a low-temperature carbonate petroleum reservoir	2013	10.1016/j.ibiod.2012.07.008	Article	English	26	Nazina T.N., Shestakova N.M., Pavlova N.K., Tatarkin Y.V., Ivoilov V.S., Khisametdinov M.R., Sokolova D., Babich T.L., Tourova T.P., Poltaraus A.B., Belyaev S.S., Ivanov M.V.
1069	Diversity of Microbial Communities in Production and Injection Waters of Algerian Oilfields Revealed by 16S rRNA Gene Amplicon 454 Pyrosequencing	2013	10.1371/journal.pone.0066588	Article	English	85	Lenchi N., Inceoǧlu Ö., Kebbouche-Gana S., Gana M.L., Llirós M., Servais P., García-Armisen T.
1070	Avian/bird flu virus: Poultry pathogen having zoonotic and pandemic threats: A review	2013	10.3923/jms.2013.301.315	Review	English	14	Dhama K., Chakraborty S., Tiwari R., Kumar A., Rahal A., Latheef S.K., Wani M.Y., Kapoor S.
1071	Single-cell and metagenomic analyses indicate a fermentative and saccharolytic lifestyle for members of the OP9 lineage	2013	10.1038/ncomms2884	Article	English	138	Dodsworth J.A., Blainey P.C., Murugapiran S.K., Swingley W.D., Ross C.A., Tringe S.G., Chain P.S.G., Scholz M.B., Lo C.-C., Raymond J., Quake S.R., Hedlund B.P.
1072	MstX and a Putative Potassium Channel Facilitate Biofilm Formation in Bacillus subtilis	2013	10.1371/journal.pone.0060993	Article	English	43	Lundberg M.E., Becker E.C., Choe S.
1073	Multitissue molecular, genomic, and developmental effects of the deepwater horizon oil spill on resident Gulf killifish (Fundulus grandis)	2013	10.1021/es400458p	Article	English	242	Dubansky B., Whitehead A., Miller J.T., Rice C.D., Galvez F.
1074	Relationship between structures of microbial colony in produced fluids and oil production performance in microbial flooding oil field	2013	10.7623/syxb201303017	Article	Chinese	7	Wang H., Song Z., Hao B., Liu T., Gao G., Guo S., Wang W.
1075	Genome of the pathogen Porphyromonas gingivalis recovered from a biofilm in a hospital sink using a high-throughput single-cell genomics platform	2013	10.1101/gr.150433.112	Article	English	49	McLean J.S., Lombardo M.-J., Ziegler M.G., Novotny M., Yee-Greenbaum J., Badger J.H., Tesler G., Nurk S., Lesin V., Brami D., Hall A.P., Edlund A., Allen L.Z., Durkin S., Reed S., Torriani F., Nealson K.H., Pevzner P.A., Friedman R., Venter J.C., Lasken R.S.
1076	Vancomycin-resistant gram-positive cocci isolated from the saliva of wild songbirds	2013	10.1007/s00284-012-0278-1	Article	English	14	Ishihara S., Bitner J.J., Farley G.H., Gillock E.T.
1077	Candida albicans and Non-C. albicans Candida Species: Comparison of Biofilm Production and Metabolic Activity in Biofilms, and Putative Virulence Properties of Isolates from Hospital Environments and Infections	2013	10.1007/s11046-013-9638-z	Article	English	52	Ferreira A.V., Prado C.G., Carvalho R.R., Dias K.S.T., Dias A.L.T.
1078	Diversity and abundance of n-alkane-degrading bacteria in the near-surface soils of a Chinese onshore oil and gas field	2013	10.5194/bg-10-2041-2013	Article	English	19	Xu K., Tang Y., Ren C., Zhao K., Sun Y.
1079	An integrated physicochemical and microbiological method for enhanced recovery of viscous oils from low temperature reservoirs of Mongolia	2013	10.1134/s0965544113020023	Article	English	0	Altunina L.K., Svarovskaya L.I., Gerelmaa T.
1080	The controls on the composition of biodegraded oils in the deep subsurface - Part 3. The impact of microorganism distribution on petroleum geochemical gradients in biodegraded petroleum reservoirs	2013	10.1016/j.orggeochem.2012.12.011	Article	English	80	Bennett B., Adams J.J., Gray N.D., Sherry A., Oldenburg T.B.P., Huang H., Larter S.R., Head I.M.
1081	Enrichment and dynamics of novel syntrophs in a methanogenic hexadecane-degrading culture from a Chinese oilfield	2013	10.1111/1574-6941.12031	Article	English	42	Cheng L., Rui J., Li Q., Zhang H., Lu Y.
1082	Selective cultures for the isolation of biosurfactant producing bacteria: Comparison of different combinations of environmental inocula and hydrophobic carbon sources	2013	10.1080/10826068.2012.719848	Article	English	5	Domingues P.M., Louvado A., Oliveira V., Coelho F.J.C.R., Almeida A., Gomes N.C.M., Cunha A.
1083	Chemical dispersant potentiates crude oil impacts on growth, reproduction, and gene expression in Caenorhabditis elegans	2013	10.1007/s00204-012-0936-x	Article	English	25	Zhang Y., Chen D., Ennis A.C., Polli J.R., Xiao P., Zhang B., Stellwag E.J., Overton A., Pan X.
1084	New gas material balance to quantify biogenic gas generation rates from shallow organic-matter-rich shales	2013	10.1016/j.fuel.2012.06.054	Article	English	16	Cokar M., Ford B., Kallos M.S., Gates I.D.
1085	Microbiological contamination and resistance genes in biofilms occurring during the drinking water treatment process	2013	10.1016/j.scitotenv.2012.11.068	Article	English	32	Farkas A., Butiuc-Keul A., Ciatarâş D., Neamţu C., Crǎciunaş C., Podar D., Drǎgan-Bularda M.
1086	Dynamics of thermogenic and late-stage biogenic gas generation in coalbed methane reservoirs of the Black Warrior basin	2013	10.1190/urtec2013-220	Conference Paper	English	0	Pashin J.C.
1087	Recent developments of high-performance PET detectors	2013	10.1201/b15511	Book Chapter	English	0	Peng H., Levin C.S.
1088	SPECT, CT and MR: Integration in degenerative musculoskeletal diseases	2013	10.1007/978-88-470-5292-5_32	Book Chapter	English	0	Veit-Haibach P.
1089	Identification of new microbial mediators for electromethanogenic reduction of geologically-stored carbon dioxide	2013	10.1016/j.egypro.2013.06.635	Conference Paper	English	7	Fu Q., Kobayashi H., Kawaguchi H., Vilcaez J., Sato K.
1090	Creation of a national database from multiple legacy data sources	2013	10.2118/165827-ms	Conference Paper	English	3	Bougherara N.E., Morsli S.A., Sali S., Khelili F., Badache R.
1091	Environmental reservoirs and mechanisms of persistence of Vibrio cholerae	2013	10.3389/fmicb.2013.00375	Review	English	157	Lutz C., Erken M., Noorian P., Sun S., McDougald D.
1092	Pili contribute to biofilm formation in vitro in Mycobacterium tuberculosis	2013	10.1007/s10482-013-9981-6	Article	English	42	Ramsugit S., Guma S., Pillay B., Jain P., Larsen M.H., Danaviah S., Pillay M.
1093	Functional gene expression of oil-degrading bacteria resistant to hexadecane toxicity	2013	10.1016/j.chemosphere.2013.07.035	Article	English	11	Yu C., Yao J., Cai M., Wang F., Masakorala K., Liu H., Blake R.E., Doni S., Ceccanti B.
1094	Characterization of the biofuel potential of a newly isolated strain of the microalga Botryococcus braunii Kützing from Assam, India	2013	10.1016/j.biortech.2013.09.057	Article	English	22	Talukdar J., Kalita M.C., Goswami B.C.
1095	Study on bioadsorption and biodegradation of petroleum hydrocarbons by a microbial consortium	2013	10.1016/j.biortech.2013.09.024	Article	English	65	Xu N., Bao M., Sun P., Li Y.
1096	In situ detection of anaerobic alkane metabolites in subsurface environments	2013	10.3389/fmicb.2013.00140	Article	English	43	Agrawal A., Gieg L.M.
1097	Characterization of a blend-biosurfactant of glycolipid and lipopeptide produced by Bacillus subtilis TU2 isolated from underground oil-extraction wastewater.	2013	10.4014/jmb.1207.09020	Article	English	27	Cheng F., Tang C., Yang H., Yu H., Chen Y., Shen Z.
1098	Soil microbe active community composition and capability of responding to litter addition after 12 years of no inputs	2013	10.1128/aem.03181-12	Article	English	36	Yarwood S., Brewer E., Yarwood R., Lajth K., Myrold D.
1099	Microbial consortia in Oman oil fields: A possible use in enhanced oil recovery	2013	10.4014/jmb.1204.04021	Article	English	26	Al-Bahry S.N., Elsahfie A.E., Al-Wahaibi Y.M., Al-Bimani A.S., Joshi S.J., Al-Maaini R.A., Al-Alawai W.J., Sugai Y., Al-Mandhari M.
1100	Characterization of the microbial diversity in production waters of mesothermic and geothermic Tunisian oilfields	2013	10.1002/jobm.201100528	Article	English	7	Mnif S., Bru-Adan V., Godon J.-J., Sayadi S., Chamkha M.
1101	Molecular detection, quantification and distribution of alkane-degrading bacteria in production water from low temperature oilfields	2013	10.1016/j.ibiod.2012.06.007	Article	English	31	Li H., Wang X.-L., Mu B.-Z., Gu J.-D., Liu Y.-D., Lin K.-F., Lu S.-G., Lu Q., Li B.-Z., Li Y.-Y., Du X.-M.
1102	Diversity and distribution of sulfate-reducing bacteria in four petroleum reservoirs detected by using 16S rRNA and dsrAB genes	2013	10.1016/j.ibiod.2012.06.021	Article	English	73	Guan J., Xia L.-P., Wang L.-Y., Liu J.-F., Gu J.-D., Mu B.-Z.
1103	Identification and Characterization of the Butane-Utilizing Bacterium, Arthrobacter sp. PG-3-2, Harboring a Novel bmoX Gene	2013	10.1080/01490451.2011.653086	Article	English	7	Zhang Y., Tang X.-J., Shen B., Yu X.-J., Wang E.-T., Yuan H.-L.
1104	Evolutionary-based approaches for determining the deviatoric stress of calcareous sands	2013	10.1016/j.cageo.2012.07.006	Article	English	27	Shahnazari H., Tutunchian M.A., Rezvani R., Valizadeh F.
1105	Optimization of a microplate-based assay to assess esterase activity in the alga pseudokirchneriella subcapitata	2013	10.1007/s11270-012-1358-3	Article	English	18	MacHado M.D., Soares E.V.
1106	Ordovician proglacial sediments in Algeria: Insights into the controls on hydrocarbon reservoirs in the in Amenas field, Illizi Basin	2012	10.1144/sp368.17	Article	English	40	Hirst J.P.P.
1107	The experimental research of biotechnology for heavy oil recovery	2012	10.4156/aiss.vol4.issue22.26	Article	English	0	Lu H., Yang S., Xie L., Chen H.
1108	Methylotrophic methanogenesis governs the biogenic coal bed methane formation in Eastern Ordos Basin, China	2012	10.1007/s00253-012-3889-3	Article	English	38	Guo H., Yu Z., Liu R., Zhang H., Zhong Q., Xiong Z.
1109	Structural features and cytotoxicity of amyloid oligomers: Implications in Alzheimer's disease and other diseases with amyloid deposits	2012	10.1016/j.pneurobio.2012.03.002	Review	English	137	Stefani M.
1110	Genome Sequence of Pseudomonas aeruginosa DQ8, an Efficient Degrader of n-Alkanes and Polycyclic Aromatic Hydrocarbons	2012	10.1128/jb.01499-12	Note	English	13	Gai Z., Zhang Z., Wang X., Tao F., Tang H., Xu P.
1111	Next-generation sequencing of microbial communities in the athabasca river and its tributaries in relation to oil sands mining activities	2012	10.1128/aem.02036-12	Article	English	162	Yergeau E., Lawrence J.R., Sanschagrin S., Waiser M.J., Korber D.R., Greer C.W.
1112	Field demonstration of Bioaugmentation in Trichloroethene-contaminated groundwater	2012	10.2166/wpt.2012.053	Article	English	4	Okutsu N., Tamura W., Mizumoto M., Ueno T., Ishida H., Iizumi T.
1113	Characterization of microbial diversity and community in water flooding oil reservoirs in China	2012	10.1007/s11274-012-1114-2	Article	English	47	Zhao L., Ma T., Gao M., Gao P., Cao M., Zhu X., Li G.
1114	Metagenomic and geochemical characterization of pockmarked sediments overlaying the Troll petroleum reservoir in the North Sea	2012	10.1186/1471-2180-12-203	Article	English	24	Håvelsrud O.E., Haverkamp T.H.A., Kristensen T., Jakobsen K.S., Rike A.G.
1115	Investigating the pore-scale mechanisms of microbial enhanced oil recovery	2012	10.1016/j.petrol.2012.06.031	Article	English	55	Armstrong R.T., Wildenschild D.
1116	Bioactive compounds and health-promoting capacity of some caucasian endemic and rare medicinal plants	2012	10.17660/actahortic.2012.955.51	Article	English	2	Manukyan A.
1117	Analyses of n-alkanes degrading community dynamics of a high-temperature methanogenic consortium enriched from production water of a petroleum reservoir by a combination of molecular techniques	2012	10.1007/s10646-012-0949-5	Article	English	61	Zhou L., Li K.-P., Mbadinga S.M., Yang S.-Z., Gu J.-D., Mu B.-Z.
1118	Impact of an indigenous microbial enhanced oil recovery field trial on microbial community structure in a high pour-point oil reservoir	2012	10.1007/s00253-011-3717-1	Article	English	40	Zhang F., She Y.-H., Li H.-M., Zhang X.-T., Shu F.-C., Wang Z.-L., Yu L.-J., Hou D.-J.
1119	Potential of microbial methane formation in a high-temperature hydrocarbon seep	2012	10.1016/j.apgeochem.2012.04.002	Article	English	3	Ling Y.-C., Chen Y.-J., Sun C.-H., Cheng T.-W., Wang P.-L., Lin L.-H.
1120	Genome sequence of the moderately thermophilic, amino-acid-degrading and sulfur-reducing bacterium Thermovirga lienii type strain (Cas60314T)	2012	10.4056/sigs.2726028	Article	English	25	Göker M., Saunders E., Lapidus A., Nolan M., Lucas S., Hammon N., Deshpande S., Cheng J.-F., Han C., Tapia R., Goodwin L.A., Pitluck S., Liolios K., Mavromatis K., Pagani I., Ivanova N., Mikhailova N., Pati A., Chen A., Palaniappan K., Land M., Chang Y.-J., Jeffries C.D., Brambilla E.-M., Rohde M., Spring S., Detter J.C., Woyke T., Bristow J., Eisen J.A., Markowitz V., Hugenholtz P., Kyrpides N.C…
1121	Bacterial dominance in subseafloor sediments characterized by methane hydrates	2012	10.1111/j.1574-6941.2012.01311.x	Article	English	38	Briggs B.R., Inagaki F., Morono Y., Futagami T., Huguet C., Rosell-Mele A., Lorenson T.D., Colwell F.S.
1122	Low impact of exposure to environmentally relevant doses of 226Ra in Atlantic cod (Gadus morhua) embryonic cells	2012	10.1016/j.jenvrad.2012.02.003	Article	English	14	Olsvik P.A., Berntssen M.H.G., Hylland K., Eriksen D.T., Holen E.
1123	Proteomic analysis of Neisseria gonorrhoeae biofilms shows shift to anaerobic respiration and changes in nutrient transport and outermembrane proteins	2012	10.1371/journal.pone.0038303	Article	English	51	Phillips N.J., Steichen C.T., Schilling B., Post D.M.B., Niles R.K., Bair T.B., Falsetta M.L., Apicella M.A., Gibson B.W.
1124	Microbial biodiversity in a Malaysian oil Weld and a systematic comparison with oil reservoirs worldwide	2012	10.1007/s00203-012-0788-z	Article	English	44	Li D., Midgley D.J., Ross J.P., Oytam Y., Abell G.C.J., Volk H., Daud W.A.W., Hendry P.
1125	The regulatory network of natural competence and transformation of Vibrio cholerae	2012	10.1371/journal.pgen.1002778	Article	English	112	Lo Scrudato M., Blokesch M.
1126	Nitrate treatment effects on bacterial community biofilm formed on carbon steel in produced water stirred tank bioreactor	2012	10.1007/s11274-012-1043-0	Article	English	21	Marques J.M., de Almeida F.P., Lins U., Seldin L., Korenblum E.
1127	Diversity and antibiotic resistance in Pseudomonas spp. from drinking water	2012	10.1016/j.scitotenv.2012.03.046	Article	English	94	Vaz-Moreira I., Nunes O.C., Manaia C.M.
1128	Succession of Deferribacteres and Epsilonproteobacteria through a nitrate-treated high-temperature oil production facility	2012	10.1016/j.syapm.2012.01.003	Article	English	37	Gittel A., Kofoed M.V.W., Sørensen K.B., Ingvorsen K., Schramm A.
1129	Microbial communities in long-term, water-flooded petroleum reservoirs with different in situ temperatures in the huabei oilfield, China	2012	10.1371/journal.pone.0033535	Article	English	82	Tang Y.-Q., Li Y., Zhao J.-Y., Chi C.-Q., Huang L.-X., Dong H.-P., Wu X.-L.
1130	Water reservoir maintained by cell growth fuels the spreading of a bacterial swarm	2012	10.1073/pnas.1118238109	Article	English	35	Wu Y., Berg H.C.
1131	Type 1 diabetes is associated with enterovirus infection in gut mucosa	2012	10.2337/db11-1157	Article	English	115	Oikarinen M., Tauriainen S., Oikarinen S., Honkanen T., Collin P., Rantala I., Mäki M., Kaukinen K., Hyöty H.
1132	Proteomics analysis of aromatic catabolic pathways in thermophilic Geobacillus thermodenitrificans NG80-2	2012	10.1016/j.jprot.2011.10.035	Article	English	14	Li Y., Wu J., Wang W., Ding P., Feng L.
1133	Strain-dependent induction of neutrophil histamine production and cell death by Pseudomonas aeruginosa	2012	10.1189/jlb.0711356	Article	English	18	Xu X., Zhang H., Song Y., Lynch S.V., Lowell C.A., Wiener-Kronish J.P., Caughey G.H.
1134	Phylogenetic diversity of microbial communities associated with the crude-oil, large-insoluble-particle and formation-water components of the reservoir fluid from a non-flooded high-temperature petroleum reservoir	2012	10.1016/j.jbiosc.2011.09.015	Article	English	62	Kobayashi H., Endo K., Sakata S., Mayumi D., Kawaguchi H., Ikarashi M., Miyagawa Y., Maeda H., Sato K.
1135	Microbial Diversity Inside Pumpkins: Microhabitat-Specific Communities Display a High Antagonistic Potential Against Phytopathogens	2012	10.1007/s00248-011-9942-4	Article	English	101	Fürnkranz M., Lukesch B., Müller H., Huss H., Grube M., Berg G.
1136	Massive dominance of Epsilonproteobacteria in formation waters from a Canadian oil sands reservoir containing severely biodegraded oil	2012	10.1111/j.1462-2920.2011.02521.x	Article	English	109	Hubert C.R.J., Oldenburg T.B.P., Fustic M., Gray N.D., Larter S.R., Penn K., Rowan A.K., Seshadri R., Sherry A., Swainsbury R., Voordouw G., Voordouw J.K., Head I.M.
1137	Salmonella persistence and transmission strategies	2012	10.1016/j.mib.2011.10.013	Review	English	67	Monack D.M.
1138	Automated DNA extraction platforms offer solutions to challenges of assessing microbial biofouling in oil production facilities	2012	10.1186/2191-0855-2-60	Article	English	21	Oldham A.L., Drilling H.S., Stamps B.W., Steven B.S., Duncan K.E.
1139	Multi-faceted approach for optimizing a microbial control program	2012	10.2118/154645-ms	Conference Paper	English	11	Keasler V., Bennett B., Keller C., Kuijvenhoven C., Mahon T., James S.
1140	Evaluation of produced volumes of carbon dioxide from the concentration of the gas absorbed in the media during microbial fermentation for enhanced oil recovery purposes	2012	10.3303/cet1227017	Conference Paper	English	0	Jimoh I.A., Søgaard E.G., Rudyk S.N.
1141	Seawater biodegradation of alkanolamines used for CO2-capture from natural gas	2012	10.1016/j.ijggc.2012.06.016	Article	English	12	Brakstad O.G., Booth A., Eide-Haugmo I., Skjæran J.A., Sørheim K.R., Bonaunet K., Vang S.-H., da Silva E.F.
1142	Microbial community characteristics of petroleum reservoir production water amended with n-alkanes and incubated under nitrate-, sulfate-reducing and methanogenic conditions	2012	10.1016/j.ibiod.2012.01.005	Article	English	42	Li W., Wang L.-Y., Duan R.-Y., Liu J.-F., Gu J.-D., Mu B.-Z.
1143	Effects of petroleum contamination on soil microbial numbers, metabolic activity and urease activity	2012	10.1016/j.chemosphere.2012.01.034	Article	English	116	Guo H., Yao J., Cai M., Qian Y., Guo Y., Richnow H.H., Blake R.E., Doni S., Ceccanti B.
1144	Evaluation of indigenous anaerobic microorganisms from Mexican carbonate reservoirs with potential MEOR application	2012	10.1016/j.petrol.2011.12.010	Article	English	30	Castorena-Cortés G., Zapata-Peñasco I., Roldán-Carrillo T., Reyes-Avila J., Mayol-Castillo M., Román-Vargas S., Olguín-Lora P.
1145	Integration of cyclic di-GMP and quorum sensing in the control of vpsT and aphA in Vibrio cholerae	2011	10.1128/jb.05167-11	Article	English	117	Srivastava D., Harris R.C., Waters C.M.
1146	Complete genome sequence of mahella australiensis type strain (50-1 BON T)	2011	10.4056/sigs.1864526	Article	English	7	Sikorski J., Teshima H., Nolan M., Lucas S., Hammon N., Deshpande S., Cheng J.-F., Pitluck S., Liolios K., Pagani I., Ivanova N., Huntemann M., Mavromatis K., Ovchinikova G., Pati A., Tapia R., Han C., Goodwin L., Chen A., Palaniappan K., Land M., Hauser L., Ngatchou-Djao O.D., Rohde M., Pukall R., Spring S., Abt B., Göker M., Detter J.C., Woyke T., Bristow J., Markowitz V., Hugenholtz P., Eisen …
1147	C-S targeted biodegradation of dibenzothiophene by stenotrophomonas sp. NISOC-04	2011	10.1007/s12010-011-9310-3	Article	English	25	Papizadeh M., Ardakani M.R., Motamedi H., Rasouli I., Zarei M.
1148	Characterization of icmF of the type VI secretion system in an avian pathogenic Escherichia coli (APEC) strain	2011	10.1099/mic.0.050005-0	Article	English	62	de Pace F., de Paiva J.B., Nakazato G., Lancellotti M., Sirsili M.P., Stehling E.G., da Silveira W.D., Sperandio V.
1149	Hydrocarbon degradation and bioemulsifier production by thermophilic Geobacillus pallidus strains	2011	10.1016/j.biortech.2011.06.074	Article	English	72	Zheng C., He J., Wang Y., Wang M., Huang Z.
1150	Microbial communities associated with acetate-rich gas-petroleum reservoir surface facilities	2011	10.1271/bbb.110243	Article	English	12	Shimizu S., Ueno A., Ishijima Y.
1151	Simultaneous hydrocarbon biodegradation and biosurfactant production by oilfield-selected bacteria	2011	10.1111/j.1365-2672.2011.05071.x	Article	English	106	Mnif S., Chamkha M., Labat M., Sayadi S.
1152	Functional characteriz ation of a biosurfactant-producing thermo-tolerant bacteria isolated from an oil reservoir	2011	10.1007/s12182-011-0152-y	Article	English	17	Wang J., Ji G., Tian J., Zhang H., Dong H., Yu L.
1153	Chloroplast lipid droplet type II NAD(P)H quinone oxidoreductase is essential for prenylquinone metabolism and vitamin K 1 accumulation	2011	10.1073/pnas.1104790108	Article	English	65	Piller L.E., Besagni C., Ksas B., Rumeau D., Bréhélin C., Glauser G., Kessler F., Havaux M.
1154	Comparison of microbial community compositions of injection and production well samples in a long-term water-flooded petroleum reservoir	2011	10.1371/journal.pone.0023258	Article	English	72	Ren H.-Y., Zhang X.-J., Song Z.-y., Rupert W., Gao G.-J., Guo S.-x., Zhao L.-P.
1155	Constraining the timing of microbial methane generation in an organic-rich shale using noble gases, Illinois Basin, USA	2011	10.1016/j.chemgeo.2011.04.019	Article	English	49	Schlegel M.E., Zhou Z., McIntosh J.C., Ballentine C.J., Person M.A.
1156	Diversity and antibiotic resistance patterns of Sphingomonadaceae isolates from drinking water	2011	10.1128/aem.00579-11	Article	English	136	Vaz-Moreira I., Nunes O.C., Manaia C.M.
1157	Biosurfactant-producing Bacillus are present in produced brines from Oklahoma oil reservoirs with a wide range of salinities	2011	10.1007/s00253-011-3326-z	Article	English	62	Simpson D.R., Natraj N.R., McInerney M.J., Duncan K.E.
1158	Evidence for syntrophic acetate oxidation coupled to hydrogenotrophic methanogenesis in the high-temperature petroleum reservoir of Yabase oil field (Japan)	2011	10.1111/j.1462-2920.2010.02338.x	Article	English	102	Mayumi D., Mochimaru H., Yoshioka H., Sakata S., Maeda H., Miyagawa Y., Ikarashi M., Takeuchi M., Kamagata Y.
1159	Salinarimonas ramus sp. nov. and Tessaracoccus oleiagri sp. nov., isolated from a crude oil-contaminated saline soil	2011	10.1099/ijs.0.025932-0	Article	English	60	Cai M., Wang L., Cai H., Li Y., Wang Y.-N., Tang Y.-Q., Wu X.-L.
1160	Isolation and characterization of Methanothermobacter crinale sp. nov., a novel hydrogenotrophic methanogen from the shengli oil field	2011	10.1128/aem.00210-11	Article	English	69	Cheng L., Dai L., Li X., Zhang H., Lu Y.
1161	Microbial community succession in a bioreactor modeling a souring low-temperature oil reservoir subjected to nitrate injection	2011	10.1007/s00253-011-3287-2	Article	English	54	Callbeck C.M., Dong X., Chatterjee I., Agrawal A., Caffrey S.M., Sensen C.W., Voordouw G.
1162	Influence of the drilling mud formulation process on the bacterial communities in thermogenic natural gas wells of the Barnett Shale	2011	10.1128/aem.00233-11	Article	English	81	Struchtemeyer C.G., Davis J.P., Elshahed M.S.
1163	Rubrimonas shengliensis sp. nov. and Polymorphum gilvum gen. nov., sp. nov., novel members of Alphaproteobacteria from crude oil contaminated saline soil	2011	10.1016/j.syapm.2011.03.004	Article	English	19	Cai M., Wang L., Cai H., Li Y., Tang Y.-Q., Wu X.-L.
1164	Influence of groundwater flowpaths, residence times and nutrients on the extent of microbial methanogenesis in coal beds: Powder River Basin, USA	2011	10.1016/j.chemgeo.2011.02.004	Article	English	80	Bates B.L., McIntosh J.C., Lohse K.A., Brooks P.D.
1165	Microbial diversity with dominance of 16S rRNA gene sequences with high GC contents at 74 and 98°C subsurface crude oil deposits in Japan	2011	10.1111/j.1574-6941.2011.01044.x	Article	English	42	Yamane K., Hattori Y., Ohtagaki H., Fujiwara K.
1166	Microbial life in a liquid asphalt desert	2011	10.1089/ast.2010.0488	Article	English	38	Schulze-Makuch D., Haque S., De Sousa Antonio M.R., Ali D., Hosein R., Song Y.C., Yang J., Zaikova E., Beckles D.M., Guinan E., Lehto H.J., Hallam S.J.
1167	Microbial communities in bulk fluids and biofilms of an oil facility have similar composition but different structure	2011	10.1111/j.1462-2920.2010.02413.x	Article	English	60	Stevenson B.S., Drilling H.S., Lawson P.A., Duncan K.E., Parisi V.A., Suflita J.M.
1168	Antagonistic activity of Bacillus sp. obtained from an Algerian oilfield and chemical biocide THPS against sulfate-reducing bacteria consortium inducing corrosion in the oil industry	2011	10.1007/s10295-010-0887-2	Article	English	27	Gana M.L., Kebbouche-Gana S., Touzi A., Zorgani M.A., Pauss A., Lounici H., Mameri N.
1169	Molecular- and cultivation-based analyses of microbial communities in oil field water and in microcosms amended with nitrate to control H2S production	2011	10.1007/s00253-010-2974-8	Article	English	33	Kumaraswamy R., Ebert S., Gray M.R., Fedorak P.M., Foght J.M.
1170	Interactions of Microbial-Enhanced Oil Recovery Processes	2011	10.1007/s11242-010-9669-6	Article	English	46	Li J., Liu J., Trefry M.G., Park J., Liu K., Haq B., Johnston C.D., Volk H.
1171	Fatty acid-gene interactions, adipokines and obesity	2011	10.1038/ejcn.2010.277	Review	English	58	Stryjecki C., Mutch D.M.
1172	Oceanotoga teriensis gen. nov., sp. nov., a thermophilic bacterium isolated from offshore oil-producing wells	2011	10.1099/ijs.0.018036-0	Article	English	30	Jayasinghearachchi H.S., Lal B.
1173	Host expression of methylmalonyl-CoA mutase and tuberculosis: A missing link?	2011	10.1016/j.mehy.2010.10.040	Article	English	7	de la Fuente J., Gortazar C., Vicente J., Villar M.
1174	Characterization of the aerobic hydrocarbon-oxidizing enrichments from a high-temperature petroleum reservoir by comparative analysis of DNA- and RNA-derived clone libraries	2011	10.1134/s0026261711010140	Article	English	19	Shestakova N.M., Korshunova A.V., Mikhailova E.M., Sokolova D.S., Tourova T.P., Belyaev S.S., Poltaraus A.B., Nazina T.N.
1175	Methanogenic archaea isolated from Taiwan's Chelungpu fault	2011	10.1128/aem.01539-10	Article	English	22	Wu S.-Y., Lai M.-C.
1176	Increased bioclogging and corrosion risk by sulfate addition during iodine recovery at a natural gas production plant	2011	10.1007/s00253-010-2859-x	Article	English	10	Lim C.-P., Zhao D., Takase Y., Miyanaga K., Watanabe T., Tomoe Y., Tanji Y.
1177	Longitudinal characterization of antimicrobial resistance genes in feces shed from cattle fed different subtherapeutic antibiotics	2011	10.1186/1471-2180-11-19	Article	English	62	Alexander T.W., Yanke J.L., Reuter T., Topp E., Read R.R., Selinger B.L., McAllister T.A.
1178	Optimization of the water-flooding process in a small 2D horizontal oil reservoir by direct transcription	2011	10.3182/20110828-6-it-1002.03503	Conference Paper	English	9	Heirung T.A.N., Wartmann M.R., Jansen J.D., Ydstie B.E., Foss B.A.
1179	Decoupling the mechanisms of Microbial Enhanced Oil Recovery	2011	10.2118/146714-ms	Conference Paper	English	2	Armstrong R.T., Wildenschild D.
1180	Isolation of a nitrate-reducing bacteria strain from oil field brine and the inhibition of sulfate-reducing bacteria	2011	10.5897/ajb10.1814	Article	English	4	Wen Z., Jizhou D., Liye C., Hongbo S.
1181	Biodegradation of aromatic hydrocarbons by Haloarchaea and their use for the reduction of the chemical oxygen demand of hypersaline petroleum produced water	2011	10.1016/j.chemosphere.2011.05.005	Article	English	88	Bonfá M.R.L., Grossman M.J., Mellado E., Durrant L.R.
1182	Characterization of an alkane-degrading methanogenic enrichment culture from production water of an oil reservoir after 274 days of incubation	2011	10.1016/j.ibiod.2010.12.010	Article	English	87	Wang L.-Y., Gao C.-X., Mbadinga S.M., Zhou L., Liu J.-F., Gu J.-D., Mu B.-Z.
1183	Investigation of biosurfactant-producing indigenous microorganisms that enhance residue oil recovery in an oil reservoir after polymer flooding	2011	10.1007/s12010-010-9032-y	Article	English	58	She Y.-H., Zhang F., Xia J.-J., Kong S.-Q., Wang Z.-L., Shu F.-C., Hu J.-M.
1184	Applications of microbial-enhanced oil recovery technology in the past decade	2011	10.1080/15567030903330793	Article	English	55	Gao C.H., Zekri A.
1185	Interactive optimization of biosurfactant production by Paenibacillus alvei ARN63 isolated from an Iranian oil well	2011	10.1016/j.colsurfb.2010.08.010	Article	English	54	Najafi A.R., Rahimpour M.R., Jahanmiri A.H., Roostaazad R., Arabian D., Soleimani M., Jamshidnejad Z.
1186	Permanent draft genome sequence of Dethiosulfovibrio peptidovorans type strain (SEBR 4207 T)	2010	10.4056/sigs.1092865	Article	English	8	Labutti k., Mayilraj S., Clum A., Lucas S., del Rio T.G., Nolan M., Tice H., Cheng J.-F., Pitluck S., Liolios K., Ivanova N., Mavromatis K., Mikhailova N., Pati A., Goodwin L., Chen A., Palaniappan K., Land M., Hauser L., Chang Y.-J., Jeffries C.D., Rohde M., Spring S., Göker M., Woyke T., Bristow J., Eisen J.A., Markowitz V., Hugenholtz P., Kyrpides N.C., Klenk H.-P., Lapidus A.
1187	New taxa in Alphaproteobacteria: Brevundimonas olei sp. nov., an esterase-producing bacterium	2010	10.1007/s12275-010-9367-7	Article	English	5	Lee M., Srinivasan S., Kim M.K.
1188	Response of microbial community structure to microbial plugging in a mesothermic petroleum reservoir in China	2010	10.1007/s00253-010-2841-7	Article	English	37	Zhang F., She Y.H., Ma S.S., Hu J.M., Banat I.M., Hou D.J.
1189	Omega-6 fat supplementation alters lipogenic gene expression in bovine subcutaneous adipose tissue	2010	10.4137/grsb.s5831	Article	English	18	Joseph S.J., Pratt S.L., Pavan E., Rekaya R., Duckett S.K.
1190	Methanogenesis, sulfate reduction and crude oil biodegradation in hot Alaskan oilfields	2010	10.1111/j.1462-2920.2010.02282.x	Article	English	137	Gieg L.M., Davidova I.A., Duncan K.E., Suflita J.M.
1191	Geochemical mobility and bioavailability of heavy metals in a lake affected by acid mine drainage: Lake Hope, Vinton County, Ohio	2010	10.1007/s11270-010-0364-6	Article	English	34	López D.L., Gierlowski-Kordesch E., Hollenkamp C.
1192	Characterization of a broad-range aldehyde dehydrogenase involved in alkane degradation in Geobacillus thermodenitrificans NG80-2	2010	10.1016/j.micres.2010.01.006	Article	English	30	Li X., Li Y., Wei D., Li P., Wang L., Feng L.
1193	Significant association between sulfate-reducing bacteria and uranium-reducing microbial communities as revealed by a combined massively parallel sequencing-indicator species approach ∇	2010	10.1128/aem.01097-10	Article	English	90	Cardenas E., Wu W.M., Leigh B.M., Carley J., Carroll S., Gentry T., Luo J., Watson D., Gu B., Ginder-Vogel M.V., Kitanidis P.K., Jardine P.M., Zhou J., Criddle C.S., Marsh T.L., Tiedje J.M.
1194	Integrated biological and chemical analysis of organochlorine compound pollution and of its biological effects in a riverine system downstream the discharge point	2010	10.1016/j.scitotenv.2010.08.009	Article	English	24	Olivares A., Quirós L., Pelayo S., Navarro A., Bosch C., Grimalt J.O., Fabregat M.D.C., Faria M., Benejam L., Benito J., Solé M., Barata C., Piña B.
1195	Polyelectrolyte multilayers fabricated from antifungal β-peptides: Design of surfaces that exhibit antifungal activity against Candida albicans	2010	10.1021/bm100424s	Article	English	66	Karlsson A.J., Flessner R.M., Gellman S.H., Lynn D.M., Palecek S.P.
1196	Airborne bacteria and antibiotic resistance genes in hospital rooms	2010	10.1007/s10453-010-9155-1	Article	English	53	Gilbert Y., Veillette M., Duchaine C.
1197	Can preening contribute to influenza A virus infection in wild waterbirds?	2010	10.1371/journal.pone.0011315	Article	English	34	Delogu M., de Marco M.A., di Trani L., Raffini E., Cotti C., Puzelli S., Ostanello F., Webster R.G., Cassone A., Donatelli I.
1198	Searching for mesophilic thermotogales bacteria: "Mesotogas" in the wild	2010	10.1128/aem.02846-09	Article	English	38	Nesbø C.L., Kumaraswamy R., Dlutek M., Doolittle W.F., Foght J.
1199	The immune response of juvenile Atlantic cod (Gadus morhua L.) to chronic exposure to produced water	2010	10.1016/j.marenvres.2010.02.005	Article	English	30	Pérez-Casanova J.C., Hamoutene D., Samuelson S., Burt K., King T.L., Lee K.
1200	Field evidence for co-metabolism of trichloroethene stimulated by addition of electron donor to groundwater	2010	10.1021/es903535j	Article	English	40	Conrad M.E., Brodie E.L., Radtke C.W., Bill M., Delwiche M.E., Lee M.H., Swift D.L., Colwell F.S.
1201	Sulfur isotope variations from orebody to hand-specimen scale at the Mežica lead-zinc deposit, Slovenia: A predominantly biogenic pattern	2010	10.1007/s00126-010-0290-y	Article	English	13	Herlec U., Spangenberg J.E., Lavrič J.V.
1202	Searching for monooxygenases and hydrolases in bacteria from an extreme environment	2010	10.1007/s00253-010-2485-7	Article	English	17	Da Cruz G.F., Angolini C.F.F., De Oliveira L.G., Lopes P.F., De Vasconcellos S.P., Crespim E., De Oliveira V.M., Dos Santos Neto E.V., Marsaioli A.J.
1203	Anaerobic biodegradation of BTEX by original bacterial communities from an underground gas storage aquifer	2010	10.1021/es100123b	Article	English	49	Berlendis S., Lascourreges J.-F., Schraauwers B., Sivadon P., Magot M.
1204	Calculation of isentropic compressibility and sound velocity in two-phase fluids	2010	10.1016/j.fluid.2009.12.022	Article	English	43	Nichita D.V., Khalid P., Broseta D.
1205	Isolation, culture and multi-directional induced differentiation of rabbit adipose derived stromal stem cells	2010	10.3969/j.issn.1673-8225.2010.14.027	Article	Chinese	1	Yang H., Wu D., Li S.-H., Zhu X.-S.
1206	Thermococcoides shengliensis gen. nov., sp. nov., a new member of the order Thermotogales isolated from oil-production fluid	2010	10.1099/ijs.0.013912-0	Article	English	25	Feng Y., Cheng L., Zhang X., Li X., Deng Y., Zhang H.
1207	Composition and dynamics of sulfate-reducing bacteria during the waterflooding process in the oil field application	2010	10.1016/j.biortech.2009.10.068	Article	English	35	Wei L., Ma F., Zhao G.
1208	Amycolicicoccus subflavus gen. nov., sp. nov., an actinomycete isolated from a saline soil contaminated by crude oil	2010	10.1099/ijs.0.010546-0	Article	English	39	Wang Y.-N., Chi C.-Q., Cai M., Lou Z.-Y., Tang Y.-Q., Zhi X.-Y., Li W.-J., Wu X.-L., Du X.
1209	Microbial diversity of an oil-water processing site and its associated oil field: The possible role of microorganisms as information carriers from oil-associated environments	2010	10.1111/j.1574-6941.2009.00813.x	Article	English	52	Van Der Kraan G.M., Bruining J., Lomans B.P., Van Loosdrecht M.C.M., Muyzer G.
1210	Characterization of the anthranilate degradation pathway in Geobacillus thermodenitrificans NG80-2	2010	10.1099/mic.0.031880-0	Article	English	21	Liu X., Dong Y., Li X., Ren Y., Li Y., Wang W., Wang L., Feng L.
1211	Quantitative prediction of the oil-bearing height of Tertiary stratigraphic reservoirs in Jiyang Depression	2010	10.1016/s1876-3804(10)60011-0	Article	English	6	Leqiang Z., Guoqi S., Fangxing N., Jinliang Z., Lihong X., Qingong Z.
1212	A Phase-partitioning model for CO2-brine mixtures at elevated temperatures and pressures: Application to CO2-enhanced geothermal systems	2010	10.1007/s11242-009-9425-y	Article	English	197	Spycher N., Pruess K.
1213	The virulence transcriptional activator aphA enhances biofilm formation by Vibrio cholerae by activating expression of the biofilm regulator VpsT	2010	10.1128/iai.00429-09	Article	English	57	Yang M., Frey E.M., Liu Z., Bishar R., Zhu J.
1214	Milankovitch-scale correlations between deeply buried microbial populations and biogenic ooze lithology	2010	10.1130/g30207.1	Article	English	10	Aiello I.W., Bekins B.A.
1215	Application of micro-RNA in regenerative nutraceuticals and functional foods	2010	10.1201/9781420087123	Book Chapter	English	0	Wu J., Luo H., Zhou L., Xiang J.
1216	Biofilm forming multi drug resistant Staphylococcus spp. among patients with conjunctivitis	2010	10.33073/pjm-2010-036	Article	English	31	Murugan K., Usha M., Malathi P., Al-Sohaibani A.S., Chandrasekaran M.
1217	δ18O shifts of geothermal waters in the central of Weihe Basin, NW China	2010	10.1007/s12665-009-0092-7	Article	English	10	Ma Z., Yu J., Su Y., Xie J., Jia X., Hu Y.
1218	Using Gene Expression Programming to estimate sonic log distributions based on the natural gamma ray and deep resistivity logs: A case study from the Anadarko Basin, Oklahoma	2010	10.1016/j.petrol.2009.11.017	Article	English	36	Cranganu C., Bautu E.
1219	Bacterial diversity in water injection systems of Brazilian offshore oil platforms	2010	10.1007/s00253-009-2281-4	Article	English	37	Korenblum E., Valoni É., Penna M., Seldin L.
1220	The transcriptional programme of Salmonella enterica serovar Typhimurium reveals a key role for tryptophan metabolism in biofilms	2009	10.1186/1471-2164-10-599	Article	English	89	Hamilton S., Bongaerts R.J.M., Mulholland F., Cochrane B., Porter J., Lucchini S., Lappin-Scott H.M., Hinton J.C.D.
1221	Microbiologically influenced corrosion of carbon steel in aqueous natural gas plant	2009	10.3323/jcorr.58.335	Article	Japanese	0	Handa T., Ohno S., Moteki M., Miyanaga K., Tanji Y.
1222	Indigenous microbial diversity in conglomerate oil reservoirs analyzed by PCR-DGGE	2009	10.1109/icbbe.2009.5162946	Conference Paper	English	0	Yuehui S., Fan Z., Fuchang S., Liping Z., Longjiang Y.
1223	Novel alkane hydroxylase gene (alkB) diversity in sediments associated with hydrocarbon seeps in the Timor Sea, Australia	2009	10.1128/aem.01370-09	Article	English	70	Wasmund K., Burns K.A., Kurtböke D.I., Bourne D.G.
1224	Geoalkalibacter subterraneus sp. nov., an anaerobic Fe(III)- and Mn(IV)-reducing bacterium from a petroleum reservoir, and emended descriptions of the family Desulfuromonadaceae and the genus Geoalkalibacter	2009	10.1099/ijs.0.001537-0	Article	English	62	Greene A.C., Patel B.K.C., Yacob S.
1225	Filomicrobium insigne sp. nov., isolated from an oil-polluted saline soil	2009	10.1099/ijs.0.65758-0	Article	English	28	Wu X.-L., Yu S.-L., Gu J., Zhao G.-F., Chi C.-Q.
1226	Hydraulic fracture propagation with 3-d leak-off	2009	10.1007/s11242-009-9375-4	Article	English	25	Mathias S.A., van Reeuwijk M.
1227	Osteogenic properties of late adherent subpopulations of human bone marrow stromal cells	2009	10.1007/s00418-009-0633-x	Article	English	19	Leonardi E., Ciapetti G., Baglìo S.R., Devescovi V., Baldini N., Granchi D.
1228	Hydrocarbon degradation by Dietzia sp. A14101 isolated from an oil reservoir model column	2009	10.1007/s10482-009-9359-y	Article	English	32	Bødtker G., Hvidsten I.V., Barth T., Torsvik T.
1229	Prokaryotic community structure and sulfate reducer activity in water from high-temperature oil reservoirs with and without nitrate treatment	2009	10.1128/aem.01123-09	Article	English	154	Gittel A., Sørensen K.B., Skovhus T.L., Ingvorsen K., Schramm A.
1230	Molecular characterization of potential nitrogen fixation by anaerobic methane-oxidizing archaea in the methane seep sediments at the number 8 Kumano Knoll in the Kumano Basin, offshore of Japan	2009	10.1128/aem.01184-09	Article	English	45	Miyazaki J., Higa R., Toki T., Ashi J., Tsunogai U., Nunoura T., Imachi H., Takai K.
1231	Biological effects of diethylene glycol (DEG) and produced waters (PWs) released from offshore activities: A multi-biomarker approach with the sea bass Dicentrarchus labrax	2009	10.1016/j.envpol.2009.05.021	Article	English	22	Stefania G., Maura B., Claudia V.L., Barbara P., Ginevra M., Francesco R.
1232	Biocorrosive thermophilic microbial communities in Alaskan North Slope oil facilities	2009	10.1021/es9013932	Article	English	157	Duncan K.E., Gieg L.M., Parisi V.A., Tanner R.S., Tringe S.G., Bristow J., Suflita J.M.
1233	Accumulation of tetracycline resistance genes in aquatic biofilms due to periodic waste loadings from swine lagoons	2009	10.1021/es9014508	Article	English	42	Zhang W., Sturm B.S.M., Knapp C.W., Graham D.W.
1234	Early traces of life investigations in drilling Archean hydrothermal and sedimentary rocks of the Pilbara Craton, Western Australia and Barberton Greenstone Belt, South Africa	2009	10.1016/j.crpv.2009.06.006	Article	English	29	Philippot P., Van Kranendonk M., Van Zuilen M., Lepot K., Rividi N., Teitler Y., Thomazo C., Blanc-Valleron M.-M., Rouchy J.-M., Grosch E., de Wit M.
1235	Molecular characterization of the alkB gene in the thermophilic Geobacillus sp. strain MH-1	2009	10.1016/j.resmic.2009.08.010	Article	English	17	Liu Y.-C., Zhou T.-T., Zhang J., Xu L., Zhang Z.-H., Shen Q.-R., Shen B.
1236	A constant flux of diverse thermophilic bacteria into the cold arctic seabed	2009	10.1126/science.1174012	Article	English	148	Hubert C., Loy A., Nickel M., Arnosti C., Baranyi C., Brüchert V., Ferdelman T., Finster K., Christensen F.M., De Rezende J.R., Vandieken V., Jørgensen B.B.
1237	Stability of binary and ternary model oil-field particle suspensions: A multivariate analysis approach	2009	10.1016/j.jcis.2009.05.068	Article	English	17	Dudášová D., Rune Flåten G., Sjöblom J., Øye G.
1238	Detection and identification of specific bacteria in wound biofilms using peptide nucleic acid fluorescent in situ hybridization (PNA FISH)	2009	10.1099/mic.0.028712-0	Article	English	154	Malic S., Hill K.E., Hayes A., Percival S.L., Thomas D.W., Williams D.W.
1239	The thermodynamic landscape of methanogenic PAH degradation	2009	10.1111/j.1751-7915.2009.00096.x	Article	English	37	Dolfing J., Xu A., Gray N.D., Larter S.R., Head I.M.
1240	Isolation and characterization of Halomonas sp. strain C2SS100, a hydrocarbon-degrading bacterium under hypersaline conditions	2009	10.1111/j.1365-2672.2009.04251.x	Article	English	131	Mnif S., Chamkha M., Sayadi S.
1241	Proteomic profiling of Cronobacter turicensis 3032, a food-borne opportunistic pathogen	2009	10.1002/pmic.200900016	Article	English	15	Carranza P., Hartmann I., Lehner A., Stephan R., Gehrig P., Grossmann J., Barkow-Oesterreicher S., Roschitzki B., Eberl L., Riedel K.
1242	Microbial response to reinjection of produced water in an oil reservoir	2009	10.1007/s00253-009-2015-7	Article	English	35	Lysnes K., Bødtker G., Torsvik T., Bjørnestad E.Ø., Sunde E.
1243	Metabolic versatility and indigenous origin of the archaeon Thermococcus sibiricus, isolated from a siberian oil reservoir, as revealed by genome analysis	2009	10.1128/aem.00718-09	Article	English	74	Mardanov A.V., Ravin N.V., Svetlitchnyi V.A., Beletsky A.V., Miroshnichenko M.L., Bonch-Osmolovskaya E.A., Skryabin K.G.
1244	Enterococcus faecalis with the gelatinase phenotype regulated by the fsr operon and with biofilm-forming capacity are common in the agricultural environment	2009	10.1111/j.1462-2920.2009.01881.x	Article	English	28	MacOvei L., Ghosh A., Thomas V.C., Hancock L.E., Mahmood S., Zurek L.
1245	Diversity and distribution of Anaeromyxobacter strains in a uranium-contaminated subsurface environment with a nonuniform groundwater flow	2009	10.1128/aem.02473-08	Article	English	44	Thomas S.H., Padilla-Crespo E., Jardine P.M., Sanford R.A., Löffler F.E.
1246	Biogenic methane production in formation waters from a large gas field in the North Sea	2009	10.1007/s00792-009-0237-3	Article	English	72	Gray N.D., Sherry A., Larter S.R., Erdmann M., Leyris J., Liengen T., Beeder J., Head I.M.
1247	Isolation, biodegradation ability and molecular detection of hydrocarbon degrading bacteria in petroleum samples from a Brazilian offshore basin	2009	10.1016/j.orggeochem.2009.02.006	Article	English	51	de Vasconcellos S.P., Crespim E., da Cruz G.F., Senatore D.B., Simioni K.C.M., dos Santos Neto E.V., Marsaioli A.J., de Oliveira V.M.
1248	Flavobacterial community structure in a hardwater rivulet and adjacent forest soil, Harz Mountain, Germany	2009	10.1007/s00284-008-9323-5	Article	English	8	Cousin S.
1249	Pneumocystis workshop: 10th anniversary summary	2009	10.1128/ec.00309-08	Review	English	36	Beck J.M., Cushion M.T.
1250	Enhanced bioremediation of methyl tert-butyl ether (MTBE) by microbial consortia obtained from contaminated aquifer material	2009	10.1016/j.chemosphere.2008.12.053	Article	English	24	Volpe A., Del Moro G., Rossetti S., Tandoi V., Lopez A.
1251	Hopanoid production by Desulfovibrio bastinii isolated from oilfield formation water	2009	10.1111/j.1574-6968.2009.01520.x	Article	English	40	Blumenberg M., Oppermann B.I., Guyoneaud R., Michaelis W.
1252	Study of asphaltenes adsorption onto different minerals and clays. Part 2. Particle characterization and suspension stability	2009	10.1016/j.colsurfa.2008.10.041	Article	English	44	Dudášová D., Flåten G.R., Sjöblom J., Øye G.
1253	Microbial analysis of backflowed injection water from a nitrate-treated North Sea oil reservoir	2009	10.1007/s10295-008-0515-6	Article	English	46	Bødtker G., Lysnes K., Torsvik T., Bjørnestad E.Ø., Sunde E.
1254	Phenotypic diversity of Flo protein family-mediated adhesion in Saccharomyces cerevisiae	2009	10.1111/j.1567-1364.2008.00462.x	Article	English	107	Van Mulders S.E., Christianen E., Saerens S.M.G., Daenen L., Verbelen P.J., Willaert R., Verstrepen K.J., Delvaux F.R.
1255	Chapter 6 Microbial Processes in Oil Fields. Culprits, Problems, and Opportunities	2009	10.1016/s0065-2164(08)00806-x	Review	English	335	Youssef N., Elshahed M.S., McInerney M.J.
1256	Evaluation of screening methods for demulsifying bacteria and characterization of lipopeptide bio-demulsifier produced by Alcaligenes sp.	2009	10.1016/j.biortech.2008.08.004	Article	English	88	Huang X.-F., Liu J., Lu L.-J., Wen Y., Xu J.-C., Yang D.-H., Zhou Q.
1257	Unsupervised approaches for automatic keyword extraction using meeting transcripts	2009	10.3115/1620754.1620845	Conference Paper	English	145	Liu F., Pennell D., Liu F., Liu Y.
1258	UV light reduces the amount of biocide required to disinfect water for fracturing fluids	2009	10.2118/125665-ms	Conference Paper	English	1	Gloe L., Neal G.
1259	Characterisation of culture-independent and -dependent microbial communities in a high-temperature offshore chalk petroleum reservoir	2009	10.1007/s10482-009-9356-1	Article	English	72	Kaster K.M., Bonaunet K., Berland H., Kjeilen-Eilertsen G., Brakstad O.G.
1260	Assessment of azaarenes and azaarones (oxidized azaarene derivatives) in the Dutch coastal zone of the North Sea	2009	10.1016/j.chemosphere.2009.04.029	Article	English	27	de Voogt P., Laane R.W.P.M.
1261	Biodegradation of geosmin by a novel Gram-negative bacterium; isolation, phylogenetic characterisation and degradation rate determination	2009	10.1016/j.watres.2009.04.005	Article	English	38	Hoefel D., Ho L., Monis P.T., Newcombe G., Saint C.P.
1262	Practical use of new microbiology tools in oil production	2009	10.2118/109104-pa	Article	English	14	Skovhus T.L., Højris B., Saunders A.M., Thomsen T.R., Agerbœk M., Larsen J.
1263	Characterizing microbial diversity in production water from an Alaskan mesothermic petroleum reservoir with two independent molecular methods	2009	10.1111/j.1462-2920.2008.01751.x	Article	English	144	Pham V.D., Hnatow L.L., Zhang S., Fallon R.D., Jackson S.C., Tomb J.-F., DeLong E.F., Keeler S.J.
1264	Formation mechanisms of heavy oils in the Liaohe Western Depression, Bohai Gulf Basin	2008	10.1007/s11430-008-6020-y	Article	English	12	Li S.M., Pang X.Q., Liu K.Y., Gao X.Z., Li X.G., Chen Z.Y., Liu B.H.
1265	Differential gene expression and biomarkers in zebrafish (Danio rerio) following exposure to produced water components	2008	10.1016/j.aquatox.2008.08.020	Article	English	62	Holth T.F., Nourizadeh-Lillabadi R., Blaesbjerg M., Grung M., Holbech H., Petersen G.I., Aleström P., Hylland K.
1266	Halomonas daqingensis sp. nov., a moderately halophilic bacterium isolated from an oilfield soil	2008	10.1099/ijs.0.65746-0	Article	English	27	Wu G., Wu X.-Q., Wang Y.-N., Chi C.-Q., Tang Y.-Q., Kida K., Wu X.-L., Luan Z.-K.
1267	Regulation of aromatic alcohol production in Candida albicans	2008	10.1128/aem.01614-08	Article	English	73	Ghosh S., Kebaara B.W., Atkin A.L., Nickerson K.W.
1268	Improved reactor performance and operability in the biotransformation of carveol to carvone using a solid-liquid two-phase partitioning bioreactor	2008	10.1002/bit.21957	Article	English	46	Morrish J.L.E., Daugulis A.J.
1269	The effect of long-term nitrate treatment on SRB activity, corrosion rate and bacterial community composition in offshore water injection systems	2008	10.1007/s10295-008-0406-x	Article	English	76	Bødtker G., Thorstenson T., Lillebø B.-L.P., Thorbjørnsen B.E., Ulvøen R.H., Sunde E., Torsvik T.
1270	Semipermeable membrane devices link site-specific contaminants to effects: PART II - A comparison of lingering Exxon Valdez oil with other potential sources of CYP1A inducers in Prince William Sound, Alaska	2008	10.1016/j.marenvres.2008.08.007	Article	English	23	Short J.W., Springman K.R., Lindeberg M.R., Holland L.G., Larsen M.L., Sloan C.A., Khan C., Hodson P.V., Rice S.D.
1271	Biotechnology in petroleum recovery: The microbial EOR	2008	10.1016/j.pecs.2008.05.001	Review	English	388	Sen R.
1272	Improved coverage of fungal diversity in polluted groundwaters by semi-nested PCR	2008	10.1016/j.scitotenv.2008.06.067	Article	English	9	Solé M., Chatzinotas A., Sridhar K.R., Harms H., Krauss G.
1273	Overproduction of free fatty acids in E. coli: Implications for biodiesel production	2008	10.1016/j.ymben.2008.08.006	Article	English	320	Lu X., Vora H., Khosla C.
1274	Bioimaging of dexamethasone and TGF β-1 and its biological activities of chondrogenic differentiation in hydrogel constructs	2008	10.1002/jbm.a.31792	Article	English	7	Na K., Kim S., Bo K.S., Dae G.W., Han N.Y., Chung H.-M., Park K.-H.
1275	Reproducing stone monument photosynthetic-based colonization under laboratory conditions	2008	10.1016/j.scitotenv.2008.06.066	Article	English	45	Miller A.Z., Laiz L., Gonzalez J.M., Dionísio A., Macedo M.F., Saiz-Jimenez C.
1276	Regulatory monoubiquitination of phosphoenolpyruvate carboxylase in germinating castor oil seeds	2008	10.1074/jbc.m806102200	Article	English	59	Uhrig R.G., She Y.-M., Leach C.A., Plaxton W.C.
1277	Past, present and future of soil quality indices: A biological perspective	2008	10.1016/j.geoderma.2008.08.007	Review	English	451	Bastida F., Zsolnay A., Hernández T., García C.
1278	Assessing soil microbial populations responding to crude-oil amendment at different temperatures using phylogenetic, functional gene (alkB) and physiological analyses	2008	10.1021/es800030f	Article	English	47	Hamamura N., Fukui M., Ward D.M., Inskeep W.P.
1279	The deep-sea bacterium Photobacterium profundum SS9 utilizes separate flagellar systems for swimming and swarming under high-pressure conditions	2008	10.1128/aem.01316-08	Article	English	61	Eloe E.A., Lauro F.M., Vogel R.F., Bartlett D.H.
1280	Disentangling oil weathering at a marine seep using GCxGC: Broad metabolic specificity accompanies subsurface petroleum biodegradation	2008	10.1021/es8013908	Article	English	65	Wardlaw G.D., Arey J.S., Reddy C.M., Nelson R.K., Ventura G.T., Valentine D.L.
1281	Attached bacterial populations shared by four species of aquatic angiosperms	2008	10.1128/aem.00952-08	Article	English	85	Crump B.C., Koch E.W.
1282	Crenarchaeota and their role in the nitrogen cycle in a subsurface radioactive thermal spring in the Austrian Central Alps	2008	10.1128/aem.02602-07	Article	English	42	Weidler G.W., Gerbl F.W., Stan-Lotter H.
1283	Effect of Tanshinone IIA on the Noncovalent Interaction Between Warfarin and Human Serum Albumin Studied by Electrospray Ionization Mass Spectrometry	2008	10.1016/j.jasms.2008.06.005	Article	English	27	Liu J., Wang X., Cai Z., Lee F.S.C.
1284	Isolation of thermotolerant, halotolerant, facultative biosurfactant- producing bacteria	2008	10.1007/s00253-008-1570-7	Article	English	49	Ghojavand H., Vahabzadeh F., Mehranian M., Radmehr M., Shahraki Kh.A., Zolfagharian F., Emadi M.A., Roayaei E.
1285	Field Testing of Lake Water Chemistry with a Portable and an AUV-based Mass Spectrometer	2008	10.1016/j.jasms.2008.04.019	Article	English	15	Hemond H.F., Mueller A.V., Hemond M.
1286	Microinjection as a tool of mechanical delivery	2008	10.1016/j.copbio.2008.07.005	Review	English	97	Zhang Y., Yu L.-C.
1287	Orchestration of transpiration, growth and carbohydrate dynamics in rice during a dry-down cycle	2008	10.1071/fp08027	Article	English	41	Luquet D., Clément-Vidal A., Fabre D., This D., Sonderegger N., Dingkuhn M.
1288	Distribution of oil-degrading bacteria in coastal seawater, Toyama Bay, Japan	2008	10.1002/tox.20409	Conference Paper	English	16	Tanaka D., Tanaka S., Yamashiro Y., Nakamura S.
1289	DNA markers associated with methane leakage from gas hydrates in the deep sea	2008	10.1109/oceanskobe.2008.4530942	Conference Paper	English	0	Katayama M., Yoshida K., Fuse H., Fukuba T., Fujii T., Okita N., Sukisaki S., Hoaki T.
1290	A gas-controlled aquarium system for ocean acidification studies	2008	10.1109/oceanskobe.2008.4531029	Conference Paper	English	9	Barry J.P., Lovera C., Okuda C., Nelson E., Pane E.
1291	Actinomycetal community structures in seawater and freshwater examined by DGGE analysis of 16s rRNA gene fragments	2008	10.1007/s10126-008-9092-y	Article	English	20	Yoshida A., Seo Y., Suzuki S., Nishino T., Kobayashi T., Hamada-Sato N., Kogure K., Imada C.
1292	Cold active microbial lipases: Some hot issues and recent developments	2008	10.1016/j.biotechadv.2008.05.003	Review	English	373	Joseph B., Ramteke P.W., Thomas G.
1293	Spatial and temporal patterns in the microbial diversity of a meromictic Soda Lake in Washington State	2008	10.1128/aem.00455-08	Article	English	65	Dimitriu P.A., Pinkart H.C., Peyton B.M., Mormile M.R.
1294	Detection of multiple hormonal activities in wastewater effluents and surface water, using a panel of steroid receptor CALUX bioassays	2008	10.1021/es702897y	Article	English	210	Van Der Linden S.C., Heringa M.B., Man H.-Y., Sonneveld E., Puijker L.M., Brouwer A., Van Der Burg B.
1295	Isolation and characterization of Methanoculleus receptaculi sp. nov. from Shengli oil field, China	2008	10.1111/j.1574-6968.2008.01212.x	Article	English	83	Cheng L., Qiu T.-L., Li X., Wang W.-D., Deng Y., Yin X.-B., Zhang H.
1296	Microscopic reversibility of protein folding in molecular dynamics simulations of the engrailed homeodomain	2008	10.1021/bi800118b	Article	English	52	McCully M.E., Beck D.A.C., Daggett V.
1297	Apoptosis induction and attenuation of inflammatory gene expression in murine macrophages via multitherapeutic nanomembranes	2008	10.1088/0957-4484/19/26/265103	Article	English	4	Pierstorff E., Krucoff M., Ho D.
1298	Competitive oxidation of volatile fatty acids by sulfate- and nitrate-reducing bacteria from an oil field in Argentina	2008	10.1128/aem.00419-08	Article	English	83	Grigoryan A.A., Cornish S.L., Buziak B., Lin S., Cavallaro A., Arensdorf J.J., Voordouw G.
1299	Metal concentrations, sperm motility, and RNA/DNA ratio in two echinoderm species from a highly contaminated fjord (the Sørfjord, Norway)	2008	10.1897/07-402.1	Article	English	15	Catarino A.I., Cabral H.N., Peeters K., Pernet P., Punjabi U., Dubois P.
1300	Proteomic analysis of stationary phase in the marine bacterium "Candidatus pelagibacter ubique"	2008	10.1128/aem.00599-08	Article	English	58	Sowell S.M., Norbeck A.D., Lipton M.S., Nicora C.D., Callister S.J., Smith R.D., Barofsky D.F., Giovannoni S.J.
1301	Modelling the formation and evolution of soils, towards an initial synthesis	2008	10.1016/j.geoderma.2008.01.016	Article	English	27	Samouëlian A., Cornu S.
1302	Assessing the potential risk of oil-field produced waters using a battery of bioassays/biomarkers	2008	10.1007/s00128-008-9465-y	Article	English	19	Li J., Ma M., Cui Q., Wang Z.
1303	Groundwater microbiological quality in Canadian drinking water municipal wells	2008	10.1139/w08-028	Article	English	30	Locas A., Barthe C., Margolin A.B., Payment P.
1304	Monitoring exogenous and indigenous bacteria by PCR-DGGE technology during the process of microbial enhanced oil recovery	2008	10.1007/s10295-008-0326-9	Article	English	35	Wang J., Ma T., Zhao L., Lv J., Li G., Zhang H., Zhao B., Liang F., Liu R.
1305	Microbiological aspects of a combined physicochemical process for enhanced oil recovery	2008	10.1134/s0965544108030110	Article	English	3	Altunina L.K., Svarovskaya L.I., Ovsyannikova V.S.
1306	Bioenergy production via microbial conversion of residual oil to natural gas	2008	10.1128/aem.00119-08	Article	English	182	Gieg L.M., Duncan K.E., Suflita J.M.
1307	Stable isotope ratios as a biomarker on mars	2008	10.1007/s11214-007-9268-1	Article	English	19	Van Zuilen M.
1308	Autoinducer-2 triggers the oxidative stress response in Mycobacterium avium, leading to biofilm formation	2008	10.1128/aem.02066-07	Article	English	71	Geier H., Mostowy S., Cangelosi G.A., Behr M.A., Ford T.E.
1309	An integrated device for monitoring time-dependent in vitro expression from single genes in picolitre droplets	2008	10.1002/cbic.200700536	Article	English	156	Courtois F., Olguin L.F., Whyte G., Bratton D., Huck W.T.S., Abell C., Hollfelder F.
1310	Isolation and characterization of a potential paraffin-wax degrading thermophilic bacterial strain Geobacillus kaustophilus TERI NSM for application in oil wells with paraffin deposition problems	2008	10.1016/j.chemosphere.2007.08.071	Article	English	61	Sood N., Lal B.
1311	Bioemulsifier production by a halothermophilic Bacillus strain with potential applications in microbially enhanced oil recovery	2008	10.1007/s10529-007-9530-3	Article	English	92	Dastgheib S.M.M., Amoozegar M.A., Elahi E., Asad S., Banat I.M.
1312	Microbial community structure analysis of produced water from a high-temperature North Sea oil-field	2008	10.1007/s10482-007-9177-z	Article	English	159	Dahle H., Garshol F., Madsen M., Birkeland N.
1313	Potential microbial enhanced oil recovery processes: A critical analysis	2008	10.2118/114676-ms	Conference Paper	English	65	Gray M.R., Yeung A., Foght J.M., Yarranton H.W.
1314	Effect of nitrate injection on the bacterial community in a water-oil tank system analyzed by PCR-DGGE.	2008	10.1007/s10295-007-0297-2	Article	English	15	Jurelevicius D., von der Weid I., Korenblum E., Valoni E., Penna M., Seldin L.
1315	Biomarker induction in tropical fish species on the Northwest Shelf of Australia by produced formation water	2008	10.1016/j.marenvres.2007.11.007	Article	English	23	Zhu S., King S.C., Haasch M.L.
1316	Microbial stabilization of riverine sediments by extracellular polymeric substances	2008	10.1111/j.1472-4669.2007.00120.x	Article	English	110	Gerbersdorf S.U., Jancke T., Westrich B., Paterson D.M.
1317	Molecular analysis of the diversity of sulfate-reducing and sulfur-oxidizing prokaryotes in the environment, using aprA as functional marker gene	2007	10.1128/aem.01272-07	Article	English	117	Meyer B., Kuever J.
1318	Methermicoccus shengliensis gen. nov., sp. nov., a thermophilic, methylotrophc methanogen isolated from oil-production water, and proposal of Methermicoccaceae fam. nov	2007	10.1099/ijs.0.65049-0	Article	English	59	Cheng L., Qiu T.-L., Yin X.-B., Wu X.-L., Hu G.-Q., Deng Y., Zhang H.
1319	Desulfotignum toluenicum sp. nov., a novel toluene-degrading, sulphate-reducing bacterium isolated from an oil-reservoir model column	2007	10.1099/ijs.0.65067-0	Article	English	52	Ommedal H., Torsvik T.
1320	Detection of Escherichia coli in biofilms from pipe samples and coupons in drinking water distribution networks	2007	10.1128/aem.00845-07	Article	English	95	Juhna T., Birzniece D., Larsson S., Zulenkovs D., Sharipo A., Azevedo N.F., Ménard-Szczebara F., Castagnet S., Féliers C., Keevil C.W.
1321	The abundance and distribution of diamondoids in biodegraded oils from the San Joaquin Valley: Implications for biodegradation of diamondoids in petroleum reservoirs	2007	10.1016/j.orggeochem.2007.07.009	Article	English	63	Wei Z., Moldowan J.M., Peters K.E., Wang Y., Xiang W.
1322	Phylogenetic analysis of methanogenic enrichment cultures obtained from Lonar Lake in India: Isolation of Methanocalculus sp. and Methanoculleus sp.	2007	10.1007/s00248-007-9228-z	Article	English	44	Surakasi V.P., Wani A.A., Shouche Y.S., Ranade D.R.
1323	Phylogenetic diversity of the archaeal community in a continental high-temperature, water-flooded petroleum reservoir	2007	10.1007/s00284-007-9002-y	Article	English	36	Li H., Yang S.-Z., Mu B.-Z.
1324	Geobacillus zalihae sp. nov., a thermophilic lipolytic bacterium isolated from palm oil mill effluent in Malaysia	2007	10.1186/1471-2180-7-77	Article	English	67	Rahman R.N.Z.R.A., Leow T.C., Salleh A.B., Basri M.
1325	Modicisalibacter tunisiensis gen. nov., sp. nov., an aerobic, moderately halophilic bacterium isolated from an oilfield-water injection sample, and emended description of the family Halomonadaceae Franzmann et al. 1989 emend. Ntougias et al. 2007	2007	10.1099/ijs.0.65088-0	Article	English	59	Gam Z.B.A., Abdelkafi S., Casalot L., Tholozan J.L., Oueslati R., Labat M.
1326	Desulfovibrio marinus sp. nov., a moderately halophilic sulfate-reducing bacterium isolated from marine sediments in Tunisia	2007	10.1099/ijs.0.64790-0	Article	English	18	Thabet O.B.D., Fardeau M.-L., Suarez-Nuñez C., Hamdi M., Thomas P., Ollivier B., Alazard D.
1327	Hydrogel-based protein nanoarrays	2007	10.1166/jnn.2007.675	Article	English	26	Saaem I., Papasotiropoulos V., Wang T., Soteropoulos P., Libera M.
1328	Wenxinia marina gen. nov., sp. nov., a novel member of the Roseobacter clade isolated from oilfield sediments of the South China Sea	2007	10.1099/ijs.0.64825-0	Article	English	23	Ying J.-Y., Wang B.-J., Dai X., Yang S.-S., Liu S.-J., Liu Z.-P.
1329	A microbiological study of an underground gas storage in the process of gas extraction	2007	10.1134/s0026261707040121	Article	English	12	Ivanova A.E., Borzenkov I.A., Tarasov A.L., Milekhina E.I., Belyaev S.S.
1330	Microbial diversity in natural asphalts of the Rancho La Brea Tar Pits	2007	10.1128/aem.01372-06	Article	English	85	Kim J.-S., Crowley D.E.
1331	Serogroup conversion of Vibrio cholerae in aquatic reservoirs	2007	10.1371/journal.ppat.0030081	Article	English	141	Blokesch M., Schoolnik G.K.
1332	Eap1p, an adhesin that mediates Candida albicans biofilm formation in vitro and in vivo	2007	10.1128/ec.00049-07	Article	English	108	Li F., Svarovsky M.J., Karlsson A.J., Wagner J.P., Marchillo K., Oshel P., Andes D., Palecek S.P.
1333	Halomonas shengliensis sp. nov., a moderately halophilic, denitrifying, crude-oil-utilizing bacterium	2007	10.1099/ijs.0.64973-0	Article	English	71	Wang Y.-N., Cai H., Chi C.-Q., Lu A.-H., Lin X.-G., Jiang Z.-F., Wu X.-L.
1334	A conventional, inactivated oil emulsion vaccine suppresses shedding and prevents viral meat colonisation in commercial (Pekin) ducks challenged with HPAI H5N1	2007	10.1016/j.vaccine.2007.02.042	Article	English	44	Beato M.S., Toffan A., De Nardi R., Cristalli A., Terregino C., Cattoli G., Capua I.
1335	Halomonas gudaonensis sp. nov., isolated from a saline soil contaminated by crude oil	2007	10.1099/ijs.0.64826-0	Article	English	59	Wang Y.-N., Cai H., Yu S.-L., Wang Z.-Y., Liu J., Wu X.-L.
1336	Mycobacterium haemophilum infections of zebrafish (Danio rerio) in research facilities	2007	10.1111/j.1574-6968.2007.00671.x	Article	English	73	Whipps C.M., Dougan S.T., Kent M.L.
1337	Effect of Fish Oil Supplementation on Fatty Acid Status, Coordination, and Fine Motor Skills in Children with Phenylketonuria	2007	10.1016/j.jpeds.2006.12.011	Article	English	75	Beblo S., Reinhardt H., Demmelmair H., Muntau A.C., Koletzko B.
1338	Oil field souring control by nitrate-reducing Sulfurospirillum spp. that outcompete sulfate-reducing bacteria for organic electron donors	2007	10.1128/aem.02332-06	Article	English	259	Hubert C., Voordouw G.
1339	Molecular phylogenetic diversity of the microbial community associated with a high-temperature petroleum reservoir at an offshore oilfield	2007	10.1111/j.1574-6941.2006.00266.x	Article	English	118	Li H., Yang S.-Z., Mu B.-Z., Rong Z.-F., Zhang J.
1340	In situ biosurfactant production by Bacillus strains injected into a limestone petroleum reservoir	2007	10.1128/aem.02264-06	Article	English	185	Youssef N., Simpson D.R., Duncan K.E., McInerney M.J., Folmsbee M., Fincher T., Knapp R.M.
1341	Marinobacter gudaonensis sp. nov., isolated from an oil-polluted saline soil in a Chinese oilfield	2007	10.1099/ijs.0.64522-0	Article	English	68	Gu J., Cai H., Yu S.-L., Qu R., Yin B., Guo Y.-F., Zhao J.-Y., Wu X.-L.
1342	Co-variations of bacterial composition and catabolic genes related to PAH degradation in a produced water treatment system consisting of successive anoxic and aerobic units	2007	10.1016/j.scitotenv.2006.11.020	Article	English	21	Wang Z., Li J., Hesham A.E.-L., He S., Zhang Y., Wang Z., Yang M.
1343	Streptococcus pneumoniae: Pathogen or protector?	2007	10.1097/mrm.0b013e3282f4cf87	Review	English	2	Charalambous B.M.
1344	High-resolution facies analyses of mudstones: Implications for paleoenvironmental and sequence stratigraphic interpretations of offshore ancient mud-dominated successions	2007	10.2110/jsr.2007.029	Article	English	111	Macquaker J.H.S., Taylor K.G., Gawthorpe R.L.
1345	Analysis of the composition of bacterial communities in oil reservoirs from a southern offshore Brazilian basin	2007	10.1007/s10482-006-9115-5	Article	English	77	Sette L.D., Simioni K.C.M., Vasconcellos S.P., Dussan L.J., Neto E.V.S., Oliveira V.M.
1346	Petrotoga halophila sp. nov., a thermophilic, moderately halophilic, fermentative bacterium isolated from an offshore oil well in Congo	2007	10.1099/ijs.0.64516-0	Article	English	56	Miranda-Tello E., Fardeau M.-L., Joulian C., Magot M., Thomas P., Tholozan J.-L., Olivier B.
1347	Temporal quorum-sensing induction regulates Vibrio cholerae biofilm architecture	2007	10.1128/iai.01190-06	Article	English	48	Liu Z., Stirling F.R., Zhu J.
1348	Filamentation by Escherichia coli subverts innate defenses during urinary tract infection	2006	10.1073/pnas.0606329104	Article	English	233	Justice S.S., Hunstad D.A., Seed P.C., Hultgren S.J.
1349	Cyclobacterium lianum sp. nov., a marine bacterium isolated from sediment of an oilfield in the South China Sea, and emended description of genus Cyclobacterium	2006	10.1099/ijs.0.64510-0	Article	English	31	Ying J.-Y., Wang B.-J., Yang S.-S., Liu S.-J.
1350	Desulfoglaeba alkanexedens gen. nov., sp. nov. an n-alkane-degrading, sulfate-reducing bacterium	2006	10.1099/ijs.0.64398-0	Article	English	86	Davidova I.A., Duncan K.E., Choi O.K., Suflita J.M.
1351	Oil biodegradation by Bacillus strains isolated from the rock of an oil reservoir located in a deep-water production basin in Brazil	2006	10.1007/s00253-006-0531-2	Article	English	64	Da Cunha C.D., Rosado A.S., Sebastián G.V., Seldin L., Von Der Weid I.
1352	Factors inhibiting bioremediation of soil contaminated with weathered oils and drill cuttings	2006	10.1016/j.envpol.2005.12.016	Article	English	112	Chaillan F., Chaîneau C.H., Point V., Saliot A., Oudot J.
1353	Cooperative biodegradation of geosmin by a consortium comprising three gram-negative bacteria isolated from the biofilm of a sand filter column	2006	10.1111/j.1472-765x.2006.01974.x	Article	English	62	Hoefel D., Ho L., Aunkofer W., Monis P.T., Keegan A., Newcombe G., Saint C.P.
1354	Phylogenetic analysis of a biofilm bacterial population in a water pipeline in the Gulf of Mexico	2006	10.1111/j.1574-6941.2006.00137.x	Article	English	57	López M.A., Javier Zavala Díaz De La Serna F., Jan-Roblero J., Romero J.M., Hernández-Rodríguez C.
1355	Techniques for the growth of Porphyromonas gingivalis biofilms	2006	10.1111/j.1600-0757.2006.00183.x	Review	English	26	Davey M.E.
1356	Biofilm development within a larval rearing tank of the tropical rock lobster, Panulirus ornatus	2006	10.1016/j.aquaculture.2006.06.023	Article	English	45	Bourne D.G., Høj L., Webster N.S., Swan J., Hall M.R.
1357	Identification of adenoid biofilms in chronic rhinosinusitis	2006	10.1016/j.ijporl.2006.05.002	Article	English	98	Zuliani G., Carron M., Gurrola J., Coleman C., Haupert M., Berk R., Coticchia J.
1358	Thermovirga lienii gen. nov., sp. nov., a novel moderately thermophilic, anaerobic, amino-acid-degrading bacterium isolated from a North Sea oil well	2006	10.1099/ijs.0.63894-0	Article	English	147	Dahle H., Birkeland N.-K.
1359	Biofilm: Its Relevance In Kidney Disease	2006	10.1053/j.ackd.2006.04.002	Article	English	20	Tapia G., Yee J.
1360	Environmental induction of CYP1A-, CYP2M1- and CYP2K1-like proteins in tropical fish species by produced formation water on the northwest shelf of Australia	2006	10.1016/j.marenvres.2006.04.058	Article	English	7	Zhu S., King S.C., Haasch M.L.
1361	Differences in gene expression between the classical and El Tor biotypes of Vibrio cholerae O1	2006	10.1128/iai.01750-05	Article	English	59	Beyhan S., Tischler A.D., Camilli A., Yildiz F.H.
1362	Accessing the black box of microbial diversity and ecophysiology: Recent advances through polyphasic experiments	2006	10.1080/10934520600614546	Article	English	36	Collins G., Kavanagh S., McHugh S., Connaughton S., Kearney A., Rice O., Carrigg C., Scully C., Bhreathnach N., Mahony T., Madden P., Enright A.-M., O'Flaherty V.
1363	Molecular analysis of the bacterial community in a continental high-temperature and water-flooded petroleum reservoir	2006	10.1111/j.1574-6968.2006.00149.x	Article	English	75	Li H., Yang S.-Z., Mu B.-Z., Rong Z.-F., Zhang J.
1364	Flocculation, adhesion and biofilm formation in yeasts	2006	10.1111/j.1365-2958.2006.05072.x	Short Survey	English	447	Verstrepen K.J., Klis F.M.
1365	Genetic and phenotypic diversity of quorum-sensing systems in clinical and environmental isolates of Vibrio cholerae	2006	10.1128/iai.74.2.1141-1147.2006	Article	English	118	Joelsson A., Liu Z., Zhu J.
1366	Automated MEMS-based Drosophila embryo injection system for high-throughput RNAi screens	2006	10.1039/b600238b	Article	English	66	Zappe S., Fish M., Scott M.P., Solgaard O.
1367	Antibiotic resistant pathogenic bacteria and their resistance genes in bacterial biofilms	2006	10.1177/039139880602900408	Article	English	39	Obst U., Schwartz T., Volkmann H.
1368	Phylogenetic diversity and activity of anaerobic microorganisms of high-temperature horizons of the Dagang oil field (P. R. China)	2006	10.1134/s0026261706010115	Article	English	75	Nazina T.N., Shestakova N.M., Grigor'yan A.A., Mikhailova E.M., Tourova T.P., Poltaraus A.B., Feng C., Ni F., Belyaev S.S.
1369	Microbial diversity in production waters of a low-temperature biodegraded oil reservoir	2005	10.1016/j.femsec.2005.05.007	Article	English	251	Grabowski A., Nercessian O., Fayolle F., Blanchet D., Jeanthon C.
1370	Characterization of long-chain fatty-acid-degrading syntrophic associations from a biodegraded oil reservoir	2005	10.1016/j.resmic.2005.03.009	Article	English	44	Grabowski A., Blanchet D., Jeanthon C.
1371	The Fallopian tubes in domestic mammals: How vital is their physiological activity?	2005	10.1051/rnd:2005020	Review	English	83	Hunter R.H.F.
1372	Candida digboiensis sp. nov., a novel anamorphic yeast species from an acidic tar sludge-contaminated oilfield	2005	10.1099/ijs.0.63313-0	Article	English	16	Prasad G.S., Mayilraj S., Sood N., Singh V., Biswas K., Lal B.
1373	Biofouling of ultra- and nanofiltration membranes fordrinking water treatment characterized by fluorescence in situ hybridization (FISH)	2005	10.1016/j.desal.2004.05.009	Article	English	48	Hörsch P., Gorenflo A., Fuder C., Deleage A., Frimmel F.H.
1374	Geobacillus jurassicus sp. nov., a new thermophilic bacterium isolated from a high-temperature petroleum reservoir, and the validation of the Geobacillus species	2005	10.1016/j.syapm.2004.09.001	Article	English	95	Nazina T.N., Sokolova D.S., Grigoryan A.A., Shestakova N.M., Mikhailova E.M., Poltaraus A.B., Tourova T.P., Lysenko A.M., Osipov G.A., Belyaev S.S.
1375	Petrimonas sulfuriphila gen. nov., sp. nov., a mesophilic fermentative bacterium isolated from a biodegraded oil reservoir	2005	10.1099/ijs.0.63426-0	Article	English	253	Grabowski A., Tindall B.J., Bardin V., Blanchet D., Jeanthon C.
1376	Effect of carbohydrates on fructosyltransferase expression and distribution in Streptococcus mutans GS-5 biofilms	2004	10.1016/j.carres.2004.07.028	Article	English	12	Rozen R., Bachrach G., Steinberg D.
1377	Bacterial diversity and ecosystem function of filamentous microbial mats from aphotic (cave) sulfidic springs dominated by chemolithoautotrophic "Epsilonproteobacteria"	2004	10.1016/j.femsec.2004.07.004	Article	English	150	Engel A.S., Porter M.L., Stern L.A., Quinlan S., Bennett P.C.
1378	Geobacillus lituanicus sp. nov	2004	10.1099/ijs.0.02976-0	Article	English	45	Kuisiene N., Raugalas J., Chitavichius D.
1379	Mahella australiensis gen. nov., sp. nov., a moderately thermophilic anaerobic bacterium isolated from an Australian oil well	2004	10.1099/ijs.0.02926-0	Article	English	28	Salinas M.B., Fardeau M.-L., Thomas P., Cayol J.-L., Patel B.K.C., Ollivier B.
1380	Detection of Helicobacter pylori by PCR but not culture in water and biofilm samples from drinking water distribution systems in England	2004	10.1111/j.1365-2672.2004.02360.x	Article	English	91	Watson C.L., Owen R.J., Said B., Lai S., Lee J.V., Surman-Lee S., Nichols G.
1381	Desulfovibrio bastinii sp. nov. and Desulfovibrio gracilis sp. nov., moderately halophilic, sulfate-reducing bacteria isolated from deep subsurface oilfield water	2004	10.1099/ijs.0.02977-0	Article	English	44	Mago M., Basso O., Tardy-Jacquenod C., Caumette P.
1382	Intracellular bacterial communities of uropathogenic Escherichia coli in urinary tract pathogenesis	2004	10.1016/j.tim.2004.07.005	Review	English	138	Anderson G.G., Dodson K.W., Hooton T.M., Hultgren S.J.
1383	Desulfovibrio alaskensis sp. nov., a sulphate-reducing bacterium from a soured oil reservoir	2004	10.1099/ijs.0.63118-0	Article	English	69	Feio M.J., Zinkevich V., Beech I.B., Llobet-Brossa E., Eaton P., Schmitt J., Guezennec J.
1384	Selection and application of microorganisms to improve oil recovery	2004	10.1002/elsc.200420033	Article	English	57	Almeida P.F., Moreira R.S., Almeida R.C.C., Guimarães A.K., Carvalho A.S., Quintella C., Esperidiã M.C.A., Taft C.A.
1385	Role of gene E2f1 in susceptibility to bacterial adherence of oral streptococci to tooth surfaces in mice	2004	10.1111/j.1399-302x.2004.00151.x	Article	English	13	Matsumoto N., Salam M.A., Watanabe H., Amagasa T., Senpuku H.
1386	Molecular analysis of shower curtain biofilm microbes	2004	10.1128/aem.70.7.4187-4192.2004	Article	English	107	Kelley S.T., Theisen U., Angenent L.T., St. Amand A., Pace N.R.
1387	Origins of variation in the fungal cell surface	2004	10.1038/nrmicro927	Review	English	158	Verstrepen K.J., Reynolds T.B., Fink G.R.
1388	Quantifying carbon sources in the formation of authigenic carbonates at gas hydrate sites in the Gulf of Mexico	2004	10.1016/j.chemgeo.2003.12.021	Article	English	123	Formolo M.J., Lyons T.W., Zhang C., Kelley C., Sassen R., Horita J., Cole D.R.
1389	Crude-oil-degrading thermophilic bacterium isolated from an oil field	2004	10.1139/w03-116	Article	English	26	Hao R., Lu A., Wang G.
1390	Isolation from oil resorvoirs of novel thermophilic anaerobes phylogenetically related to Thermoanaerobacter subterraneus: Reassignment of T. subterraneus, Thermoanaerobacter yonseiensis, Thermoanaerobacter tengcongensis and Carboxydibrachium pacificum to Caldanaerobacter subterraneus gen. nov., sp. nov., comb. nov. as four novel subspecies	2004	10.1099/ijs.0.02711-0	Article	English	97	Fardeau M.-L., Bonilla Salinas M., L'Haridon S., Jeanthon C., Verhé F., Cayol J.-C., Patel B.K.C., Garcia J.-L., Ollivier B.
1391	The microbial diversity of deep subsurface oil reservoirs	2004	10.1016/s0167-2991(04)80155-1	Review	English	11	Birkeland N.-K.
1392	TEST APPARATUS FOR CONDUCTING RESEARCH INTO VORTEX INDUCED VIBRATION OF MARINE RISERS AT HIGH REYNOLDS NUMBERS	2004	10.5957/attc-2004-007	Conference Paper	English	0	Spencer D.
1393	Recent successes: Green technology for H2S elimination and increased oil recovery	2004	10.2118/2004-173	Conference Paper	English	0	McLenehan K., Dennis M., Hitzman D.
1394	Redesign of the human metabolic simulator	2004	10.4271/2004-01-2497	Conference Paper	English	2	Duffield B., Jeng F., Lange K.
1395	Hypersaline microbial systems of sabkhas: Examples of life's survival in "Extreme" conditions	2004	10.1089/ast.2004.4.450	Article	English	28	Krumbein W.E., Gorbushina A.A., Holtkamp-Tacken E.
1396	Microbial diversity and functional characterization of sediments from reservoirs of different trophic state	2003	10.1016/s0168-6496(03)00249-6	Conference Paper	English	132	Wobus A., Bleul C., Maassen S., Scheerer C., Schuppler M., Jacobs E., Röske I.
1397	Recent Advances in Petroleum Microbiology	2003	10.1128/mmbr.67.4.503-549.2003	Review	English	984	Van Hamme J.D., Singh A., Ward O.P.
1398	Bacterial Biofilms: An Emerging Link to Disease Pathogenesis	2003	10.1146/annurev.micro.57.030502.090720	Review	English	1183	Parsek M.R., Singh P.K.
1399	Chemical and Microbial Composition of Sediments in Reservoirs with Different Trophic State	2003	10.1002/iroh.200310596	Article	English	13	Maassen S., Röske I., Uhlmann D.
1400	Radioisotopic, Culture-Based, and Oligonucleotide Microchip Analyses of Thermophilic Microbial Communities in a Continental High-Temperature Petroleum Reservoir	2003	10.1128/aem.69.10.6143-6151.2003	Article	English	149	Bonch-Osmolovskaya E.A., Miroshnichenko M.L., Lebedinsky A.V., Chernyh N.A., Nazina T.N., Ivoilov V.S., Belyaev S.S., Boulygina E.S., Lysov Y.P., Perov A.N., Mirzabekov A.D., Hippe H., Stackebrandt E., L'Haridon S., Jeanthon C.
1401	Gordonia paraffinivorans sp. nov., a hydrocarbon-degrading actinomycete isolated from an oil-producing well	2003	10.1099/ijs.0.02605-0	Article	English	43	Xue Y., Sun X., Zhou P., Liu R., Liang F., Ma Y.
1402	Garciella nitratireducens gen. nov., sp. nov., an anaerobic, thermophilic, nitrate- and thiosulfate-reducing bacterium isolated from an oilfield separator in the Gulf of Mexico	2003	10.1099/ijs.0.02662-0	Article	English	51	Miranda-Tello E., Fardeau M.-L., Sepúlveda J., Fernández L., Cayol J.-L., Thomas P., Ollivier B.
1403	Alkanindiges illinoisensis gen. nov., sp. nov., an obligately hydrocarbonoclastic, aerobic squalane-degrading bacterium isolated from oilfield soils	2003	10.1099/ijs.0.02568-0	Article	English	65	Bogan B.W., Sullivan W.R., Kayser K.J., Derr K.D., Aldrich H.C., Paterek J.R.
1404	Geochemical influence on diversity and microbial processes in high temperature oil reservoirs	2003	10.1080/01490450303898	Article	English	54	Orphan V.J., Goffredi S.K., Delong E.F., Boles J.R.
1405	Autonomous microneedle system for biochemical analysis	2003	10.1109/sensor.2003.1217047	Conference Paper	English	6	Chandrasekaran S., Mohanty S.K., Frazier A.B.
1406	Assessing changes in physical and biological properties in a soil contaminated by oil sludges under semiarid Mediterranean conditions	2003	10.1016/s0016-7061(03)00118-6	Article	English	66	Caravaca F., Roldán A.
1407	An evaluation of the importance of sulfate reduction and temperature to P fluxes from aerobic-surfaced, lacustrine sediments	2002	10.1023/a:1020291130333	Article	English	16	Suplee M.W., Cotner J.B.
1408	Petrotoga olearia sp. nov., and Petrotoga sibirica sp. nov., two thermophilic bacteria isolated from a continental petroleum reservoir in Western Siberia	2002	10.1099/ijs.0.02153-0	Article	English	48	L'Haridon S., Miroshnichenko M.L., Hippe H., Fardeau M.-L., Bonch-Osmolovskaya E.A., Stackebrandt E., Jeanthon C.
1409	Application of microbial enhanced oil recovery technique to Daqing Oilfield	2002	10.1016/s1369-703x(02)00025-6	Conference Paper	English	68	Li Q., Kang C., Wang H., Liu C., Zhang C.
1410	Species diversity improves the efficiency of mercury-reducing biofilms under changing environmental conditions	2002	10.1128/aem.68.6.2829-2837.2002	Article	English	110	Von Canstein H., Kelly S., Li Y., Wagner-Döbler I.
1411	Simulation of biogenic sediment stabilisation by heterotrophic bacteria in an annular flume	2002	10.1016/s1568-2692(02)80029-8	Book Chapter	English	2	Prochnow J., Schweim C., Koengeter J.
1412	A Successful Field Test of Microbial EOR Process in Fuyu Oilfield, China	2002	10.2523/75238-ms	Conference Paper	English	18	Nagase K., Zhang S.T., Asami H., Yazawa N., Fujiwara K., Enomoto H., Hong C.X., Liang C.X.
1413	Molecular phylogeny of type II methane-oxidizing bacteria isolated from various environments	2002	10.1099/00221287-148-9-2831	Article	English	113	Heyer J., Galschenko V.F., Dunfield P.F.
1414	Detection of Helicobacter pylori DNA in drinking water biofilms: Implications for transmission in early life	2002	10.1046/j.1472-765x.2002.01122.x	Article	English	62	Bunn J.E.G., MacKay W.G., Thomas J.E., Reid D.C., Weaver L.T.
1415	Phytomonitoring the unique colonization of oil-contaminated saline environment by Limoniastrum monopetalum (L.) Boiss in Egypt	2002	10.1016/s0160-4120(02)00016-8	Article	English	10	Hussein H.S., Terry N.
1416	Extracellular matrix mineralization and osteoblast gene expression by human adipose tissue-derived stromal cells	2001	10.1089/107632701753337681	Article	English	447	Halvorsen Y.-D.C., Franklin D., Bond A.L., Hitt D.C., Auchter C., Boskey A.L., Paschalis E.P., Wilkison W.O., Gimble J.M.
1417	Isolation and characterization of Thermococcus sibiricus sp. nov. from a Western Siberia high-temperature oil reservoir	2001	10.1007/s007920100175	Article	English	71	Miroshnichenko M.L., Hippe H., Stackebrandt E., Kostrikina N.A., Chernyh N.A., Jeanthon C., Nazina T.N., Belyaev S.S., Bonch-Osmolovskaya E.A.
1418	Control of biogenic h2s production with nitrite and molybdate	2001	10.1038/sj.jim.7000142	Article	English	122	Nemati M., Mazutinec T.J., Jenneman G.E., Voordouw G.
1419	Isolation and characterization of psychrotrophic bacteria from oil-reservoir water and oil sands	2001	10.1007/s002530000556	Article	English	33	Kato T., Haruki M., Imanaka T., Morikawa M., Kanaya S.
1420	Microbial enhanced oil recovery: Diverse successful applications of biotechnology in the oil field	2001	10.2523/72129-ms	Conference Paper	English	26	Bailey S.A., Kenney T.M., Schneider D.R.
1421	Starvation survivability of Thermococcus strains isolated from Japanese oil reservoirs	2001	10.1007/s002030100318	Article	English	15	Takahata Y., Hoaki T., Maruyama T.
1422	Taxonomic study of aerobic thermophilic bacilli: Descriptions of Geobacillus subterraneus gen. nov., sp. nov. and Geobacillus uzenensis sp. nov. from petroleum reservoirs and transfer of Bacillus stearothermophilus, Bacillus thermocatenulatus, Bacillus thermoleovorans	2001	10.1099/00207713-51-2-433	Article	English	606	Nazina T.N., Tourova T.P., Poltaraus A.B., Novikova E.V., Grigoryan A.A., Ivanova A.E., Lysenko A.M., Petrunyaka V.V., Osipov G.A., Belyaev S.S., Ivanov M.V.
1423	Antifungal resistance of Candidal biofilms formed on denture acrylic in vitro	2001	10.1177/00220345010800031101	Article	English	431	Chandra J., Mukherjee P.K., Leidich S.D., Faddoul F.F., Hoyer L.L., Douglas L.J., Ghannoum M.A.
1424	Propionibacterium microaerophilum sp. nov., a microaerophilic bacterium isolated from olive mill wastewater	2001	10.1099/00207713-51-4-1373	Article	English	43	Koussémon M., Combet-Blanc Y., Patel B.K.C., Cayol J.-L., Thomas P., Garcia J.-L., Ollivier B.
1425	A novel gene encoding a 54 kDa polypeptide is essential for butane utilization by Pseudomonas sp. IMT37	2001	10.1099/00221287-147-9-2479	Article	English	18	Padda R.S., Pandey K.K., Kaul S., Nair V.D., Jain R.K., Basu S.K., Chakrabarti T.
1426	Duplicated gene clusters suggest an interplay of glycogen and trehalose metabolism during sequential stages of aerial mycelium development in Streptomyces coelicolor A3(2)	2000	10.1007/s004380051200	Article	English	39	Schneider D., Bruton C.J., Chater K.F.
1427	Culture-dependent and culture-independent characterization of microbial assemblages associated with high-temperature petroleum reservoirs	2000	10.1128/aem.66.2.700-711.2000	Article	English	391	Orphan V.J., Taylor L.T., Hafenbradl D., Delong E.F.
1428	A new set of Arabidopsis expressed sequence tags from developing seeds. The metabolic pathway from carbohydrates to seed oil	2000	10.1104/pp.124.4.1582	Article	English	194	White J.A., Todd J., Newman T., Folks N., Girke T., Martínez de Ilárduya O., Jaworski J.G., Ohlrogge J.B., Benning C.
1429	Fundamental studies for microbial enhanced oil recovery field test	2000	10.1627/jpi1958.43.91	Article	Japanese	2	Enomoto H.
1430	Geochemical effects of rapid sedimentation in aquatic systems: Minimal diagenesis and the preservation of historical metal signatures	2000	10.1023/a:1008114630756	Article	English	38	Callender E.
1431	Energy requirements of migrating Great White Pelicans Pelecanus onocrotalus	2000	10.1111/j.1474-919x.2000.tb04860.x	Article	English	14	Shmueli M., Izhaki I., Arieli A., Arad Z.
1432	Microbiology of petroleum reservoirs	2000	10.1023/a:1002434330514	Review	English	430	Magot M., Ollivier B., Patel B.K.C.
1433	Denitrovibrio acetiphilus, a novel genus and species of dissimilatory nitrate-reducing bacterium isolated from an oil reservoir model column	2000	10.1099/00207713-50-4-1611	Article	English	60	Myhr S., Torsvik T.
1434	Protease inhibitor-containing regimens compared with nucleoside analogues alone in the suppression of persistent HIV-1 replication in lymphoid tissue	1999	10.1097/00002030-199901140-00001	Article	English	66	Ruiz L., Van Lunzen J., Arno A., Stellbrink H.-J., Schneider C., Rull M., Castellà E., Ojanguren I., Richman D.D., Clotet B., Tenner-Racz K., Racz P.
1435	Experimental and numerical modeling of microbial plugging of a fracture	1999	10.2118/99-124	Conference Paper	English	1	Zhong L., Islam M.R.
1436	Microglial activation varies in different models of Creutzfeldt-Jakob disease	1999	10.1128/jvi.73.6.5089-5097.1999	Article	English	82	Baker C.A., Lu Z.Y., Zaitsev I., Manuelidis L.
1437	Effect of temperature on production of CH4 and CO2 from peat in a natural and flooded boreal forest wetland	1998	10.1023/a:1005416903368	Article	English	47	McKenzie C., Schiff S., Aravena R., Kelly C., St. Louis V.
1438	Expression and localization of ferritin mRNA in ameloblasts of rat incisor	1998	10.1016/s0003-9969(98)00014-4	Article	English	13	Miyazaki Y., Sakai H., Shibata Y., Shibata M., Mataki S., Kato Y.
1439	A comparative analysis of mutagenic activities of air samples collected from Riyadh before, during and after the Gulf War	1998	10.1080/09603129873615	Article	English	3	Al-Khodairy F., Al-Dakan A., Akel M., Hannan M.A.
1440	A -55 to +200°C 12-bit analog-to-digital converter	1998	10.1109/9780470544884.ch99	Book Chapter	English	1	Prazak P.R.
1441	Bioenergetics of sulphate-reducing bacteria in relation to their environmental impact	1998	10.1023/a:1008362304234	Conference Paper	English	59	Hamilton W.A.
1442	Long-term starvation survival of a thermophilic sulfidogen consortium	1998	10.1080/01490459809378060	Article	English	6	Bass C.J., Anthony Davey R., Lappin-Scott H.M.
1443	Identification and phylogenetic analysis of thermophilic sulfate-reducing bacteria in oil field samples by 16S rDNA gene cloning and sequencing	1998	10.1006/anae.1998.0156	Article	English	27	Leu J.-Y., McGovern-Traa C.P., Porter A.J.R., Harris W.J., Hamilton W.A.
1444	Desulfotomaculum halophilum sp. nov., a halophilic sulfate-reducing bacterium isolated from oil production facilities	1998	10.1099/00207713-48-2-333	Article	English	70	Tardy-Jacquenod C., Magot M., Patel B.K.C., Matheron R., Caumette P.
1445	Desulfobulbus rhabdoformis sp. nov., a sulfate reducer from a water-oil separation system	1998	10.1099/00207713-48-2-469	Article	English	62	Lien T., Madsen M., Steen I.H., Gjerdevik K.
1446	Cross-contamination potential of saliva ejectors used in dentistry	1998	10.1016/s0195-6701(98)90308-5	Article	English	23	Barbeau J., Ten Bokum L., Gauthier C., Prévost A.P.
1447	Chlorine sensitivity of environmental, distribution system and biofilm coliforms	1997	10.1016/s0273-1223(97)00274-6	Conference Paper	English	10	Sartory D.P., Holmes P.
1448	Sustained elevated serum somatotropin concentrations in Holstein steers following subcutaneous delivery of a growth hormone releasing factor analog dispersed in water, oil or microspheres	1997	10.1016/s0168-3659(96)01623-9	Article	English	10	Foster T.P., Moseley W.M., Caputo J.F., Alaniz G.R., Leatherman M.W., Yu X., Claflin W.H., Reeves D.R., Cleary D.L., Zantello M.R., Krabill L.F., Wiest J.R.
1449	Developing a field strategy to eliminate crossflow along a horizontal well	1997	10.2118/97-09-02	Article	English	0	Wong F.Y., Fong D.K.
1450	Acetate and propionate in landfill leachates: Implications for the recognition of microbiological influences on the composition of waters in sedimentary systems	1997	10.1130/0091-7613(1997)025<0279:aapill>2.3.co;2	Article	English	13	Manning D.A.C.
1451	Dethiosulfovibrio peptidovorans gen. nov., sp. nov., a new anaerobic, slightly halophilic, thiosulfate-reducing bacterium from corroding offshore oil wells	1997	10.1099/00207713-47-3-818	Article	English	138	Magot M., Ravot G., Campaignolle X., Ollivier B., Patel B.K.C., Fardeau M.-L., Thomas P., Crolet J.-L., Garcia J.-L.
1452	Generalized analytical method for coning calculation: New solution to calculation both the gas coning, water coning and dual coning for vertical and horizontal wells [Méthode analytique généralisée pour le calcul du coning: Nouvelle solution pour calculer le coning de gaz, d'eau et double coning dans les puits verticaux et horizontaux]	1996	10.2516/ogst:1996036	Article	French	0	Pietraru V.
1453	Methanococcus thermolithotrophicus isolated from North Sea oil field reservoir water	1996	10.1128/aem.62.2.728-731.1996	Article	English	75	Nilsen R.K., Torsvik T.
1454	Pieter Schenck Award acceptance speech. Geochemical indicators of biodegradation: Tools for developing and managing heavy oil assets (17th International Meeting on Organic Geochemistry, Donostia-San Sebastian, September 6, 1995)	1996	10.1016/0146-6380(96)00029-0	Conference Paper	English	0	McCaffrey M.A.
1455	Thermotoga subterranea sp. nov., a new thermophilic bacterium isolated from a continental oil reservoir	1995	10.1007/bf02525313	Article	English	92	Jeanthon C., Reysenbach A.-L., L'Haridon S., Gambacorta A., Pace N.R., Glénat P., Prieur D.
1456	Electrical resistance tomography during in-situ trichloroethylene remediation at the Savannah River Site	1995	10.1016/0926-9851(95)90044-6	Article	English	112	Daily W., Ramirez A.
1457	Description of Thermoanaerobacter brockii subsp. lactiethylicus subsp. nov., isolated from a deep subsurface French oil well, a proposal to reclassify Thermoanaerobacter finnii as Thermoanaerobacter brockii subsp. finnii comb. nov., and an Emended description of Thermoanaerobacter brockii	1995	10.1099/00207713-45-4-783	Article	English	79	Cayol J.-L., Ollivier B., Patel B.K.C., Ravot G., Magot M., Ageron E., Grimont P.A.D., Garcia J.-L.
1458	Detection of Desulfobacter in oil field environments by non-radioactive DNA probes	1994	10.1007/bf00902759	Article	English	15	Brink D.E., Vance I., White D.C.
1459	Survival mechanisms of hydrogen sulphide-producing bacteria isolated from extreme environments and their role in corrosion	1994	10.1016/0964-8305(94)90090-6	Article	English	11	Lappin-Scott H.M., Bass C.J., McAlpine K., Sanders P.F.
1460	Microbial Characteristics and Metabolic Activity of Bacteria from Venezuelan Oil Wells	1993	10.1016/s0376-7361(09)70068-8	Article	English	1	Bastardo H., Vierma L., Estevez A.
1461	Use of Natural Microflora, Electron Acceptors and Energy Sources for Enhanced Oil Recovery	1993	10.1016/s0376-7361(09)70046-9	Article	English	17	Sperl G.T., Sperl P.L., Hitzman D.O.
1462	Causes and Control of Microbially Induced Souring	1993	10.1016/s0376-7361(09)70073-1	Article	English	12	McInerney M.J., Sublette K.L., Bhupathiraju V.K., Coates J.D., Knapp R.M.
1463	A Nutrient Control Process for Microbially Enhanced Oil Recovery Applications	1993	10.1016/s0376-7361(09)70069-x	Article	English	4	Jenneman G.E., Clark J.B., Moffitt P.D.
1464	Isolation of Thermophilic Bacteria from a Venezuelan Oil Field	1993	10.1016/s0376-7361(09)70075-5	Article	English	8	Sanchez G., Marin A., Vierma L.
1465	Arhodomonas aquaeolei gen. nov., sp. nov., an aerobic, halophilic bacterium isolated from a subterranean brine	1993	10.1099/00207713-43-3-514	Article	English	36	Adkins J.P., Madigan M.T., Mandelco L., Woese C.R., Tanner R.S.
1466	Produced water chemistry points to damage mechanisms associated with seawater injection	1993	10.2523/26045-ms	Conference Paper	English	5	Braden J.C., McLelland W.G.
1467	Application of microbial enhanced oil recovery technique to a Turkish heavy oil	1992	10.1007/bf00172204	Article	English	29	Behlulgil K., Mehmetoglu T., Donmez S.
1468	Mixed culture microbial enhanced waterflood: Tertiary MEOR case study	1992	10.2523/24820-ms	Conference Paper	English	11	Portwood J.T., Hiebert F.K.
1469	Correlations of gulf coast petroleums on the basis of branched acyclic alkanes	1992	10.1016/0146-6380(92)90148-q	Article	English	5	Thompson K.F.M., Kennicutt II M.C.
1470	Microbial composition of carbonate petroleum reservoir fluids	1992	10.1080/01490459209377909	Article	English	67	Adkins J.P., Cornell L.A., Tanner R.S.
1471	Ch. R-2 Analysis of Biomass in Rock Cores Following Nutrient Stimulation	1991	10.1016/s0376-7361(09)70150-5	Article	English	3	Gevertz D., Solis R.M., Wood W.A.
1472	Ch. R-6 Isolation and Characterization of Anaerobic Halophilic Bacteria From Oil Reservoir Brines	1991	10.1016/s0376-7361(09)70154-2	Article	English	15	Gevertz D., Paterek J.R., Davey M.E., Wood W.A.
1473	Protective effect of glycine betaine on survival of Escherichia coli cells in marine environments	1991	10.2166/wst.1991.0043	Conference Paper	English	13	Gauthier M.J., Flatau G.N., Breittmayer V.A.
1474	Iron sulfide minerals at Cement oil field, Oklahoma: Implications for magnetic detection of oil fields	1990	10.1130/0016-7606(1990)102<0368:ismaco>2.3.co;2	Article	English	38	Reynolds R.L., Fishman N.S., Wanty R.B., Goldhaber M.B.
1475	Are the n-3 fatty acids from dietary fish oil deposited in the triglyceride stores of adipose tissue?	1990	10.1093/ajcn/51.4.535	Article	English	57	Lin D.S., Connor W.E.
1476	The Subsurface Environment	1989	10.1016/s0376-7361(09)70090-1	Article	English	9	Donaldson E.C., Knapp R.M., Yen T.F., Chilingarian G.V.
1477	Physiological adaptations to extreme pressures: The implications for palaeoecology	1989	10.1017/s0263593300028704	Article	English	3	Macdonald A.G.
1478	Photosynthesis and respiration of a diatom biofilm cultured in a new gradient growth chamber	1989	10.1016/0378-1097(89)90103-1	Article	English	38	Jensen J., Revsbech N.P.
1479	Semiautomatic software for quantitative analysis of cardiac positron tomography studies	1988	10.1117/12.968661	Conference Paper	English	16	Ratib O., Bidaut L., Nienaber C., Krivokapich J., Schelbert H.R., Phelps M.E.
1480	Isolation of extremely thermophilic sulfate reducers: Evidence for a novel branch of archaebacteria	1987	10.1126/science.236.4803.822	Article	English	229	Stetter K.O., Lauerer G., Thomm M., Neuner A.
1481	The effect of pressure and temperature on sulphate‐reducing bacteria and the action of biocides in oilfield water injection systems	1986	10.1111/j.1365-2672.1986.tb03758.x	Article	English	19	Stott J.F.D., Herbert B.N.
1482	Transmission of the coconut cadang‐cadang viroid to six species of palm by inoculation with nucleic acid extracts	1985	10.1111/j.1365-3059.1985.tb01378.x	Article	English	18	IMPERIAL J.S., BAUTISTA R.M., RANDLES J.W.
1483	Development, oil storage and dehiscence of peltate trichomes in Thymus vulgaris (Lamiaceae)	1983	10.1111/j.1756-1051.1983.tb01073.x	Article	English	50	Bruni A., Modenesi P.
1484	Studies in the mineral nutrition of Japanese mint - I. Influence of potassium deficiency on phosphorus metabolism, respiration, foliage growth and essential oil content	1982	10.1007/bf02183795	Article	English	4	Sinha N.C., Singh J.N.
1485	The Strouhal number of vortex shedding from marine risers in currents at supercritical Reynolds number	1982	10.4043/4318-ms	Conference Paper	English	3	Coder D.W., Pattison J.H.
1486	Quantitative histochemical effects of whisker damage on single identified cortical barrels in the adult mouse	1981	10.1523/jneurosci.01-09-00929.1981	Article	English	44	Dalton Deitrich W., Durham D., Lowry O.H., Woolsey T.A.
1487	Sulphur isotope rations in late and early Precambrian sediments and their implications regarding early environments and early life	1980	10.1007/bf00928664	Article	English	10	Thode H.G.

## Sheet: Without DOI
Item	Title	Year	DOI	Document Type	Language	Cited By	Author(s)
116	Vertical transport of antibiotic resistance genes in soil affected by rainfall and physical-chemical factors based on one-dimensional soil column experiments	2022		Conference Paper	English	0	Yuchen J., Shuguang L., Sha L., Dorzhievna R.L., Elena N., Nikolavich M.A., Tavares A.J.
117	Experimental Study of Dynamic Characteristics of an Ultra-Large Jacket Offshore Wind Turbine Under Wind Loads Using Joint Aero-Hydro-Elastic Similarities	2022		Conference Paper	English	0	Li Y., Lu D., Wang W., Li X.
215	Pharmacological virtue of punica granatum	2021		Book Chapter	English	0	Sharma K., Mudgal A., Khan B., Kaushik R., Sharma G.
260	Online Evaluation of Text-to-sign Translation by Deaf End Users: Some Methodological Recommendations	2021		Conference Paper	English	1	Roelofsen F., Esselink L., Mende-Gillings S., de Meulder M., Sijm N., Smeijers A.
272	VLDB 2021 crowd science challenge on aggregating crowdsourced audio transcriptions	2021		Conference Paper	English	0	Ustalov D., Pavlichenko N., Stelmakh I., Kuznetsov D.
275	Mouth as virus reservoir: Protection against infection by reducing the biofilm? [Virusreservoir Mund: Infektionsschutz durch Reduktion des Biofilms?]	2021		Article	German	0	Fischer S.
285	Inorganic carbon sequestration: The oxalate-carbonate pathway in calcareous karstic environments [Secuestro inorgánico de carbono: La ruta oxalatocarbonato en ambientes kársticos calcáreos]	2021		Review	Spanish	1	Álvarez-Rivera O.O., Estrada-Medina H., Jiménez-Osornio J.J.
382	Seasonal variation and reserves estimation of particulate organic carbon (POC) in the central Bohai Sea [渤海中部海域颗粒有机碳季节性变化及碳库估算]	2020		Article	Chinese	1	Li C.-C., Wang L.-S., Tang H.-J., Zhang H.-B.
435	Optimizing floating offshore multi-wind-turbine design: A parametricstudy on tower inclination and column spacing	2020		Conference Paper	English	1	Udoh I.E., Zou J.
436	Decommissioning of subsea structures in Brazil: Impact of invasive species and genome sequence of the invasive azooxanthellate coral tubastraea sp.	2020		Conference Paper	English	0	Batista J.H.G., Rebelo M., Soares-Souza G.
440	IrisA at TRECVID2015: Leveraging multimodal LDa for video hyperlinking	2020		Conference Paper	English	2	Bois R., Şimon A.-R., Sicre R., Gravier G., Sébillot P.
510	Beer brewing and the environmental engineer:”Tapping” into experiential learning	2019		Conference Paper	English	0	Murray M.K.R., Wallen B.M., Plante L., Quell K., Butkus M.A.
532	Comparison of type I interferon expression in adult and neonatal mice during respiratory viral infection	2019		Conference Paper	English	0	Liang Z.
566	Large-vocabulary chord transcription via chord structure decomposition	2019		Conference Paper	English	8	Jiang J., Chen K., Li W., Xia G.
568	Potential hybridization of bioremediation and desalination: A preliminary study for salt-tolerant bacteria	2019		Conference Paper	English	0	Chang W., Lee A.H., Kim J.
578	Biogenic sulfide production in offshore petroleum reservoirs undergoing waterflooding	2019		Review	English	3	Bolaji T.A., Oti M.N., Abu G.O., Onyekonwu M.O.
583	Improved methods for the determination of viscosities of dead, saturated, and under-saturated reservoir oils	2019		Article	English	0	Kamari A., Sattari M., Mohammadi A.H., Ramjugernath D.
585	Improved models for the estimation of PVT properties of crude oils	2019		Article	English	0	Kamari A., Sattari M., Mohammadi A.H., Ramjugernath D.
586	Investigating the effect of temperature in the community structure of an oilfield microbial consortium, and its impact on corrosion of carbon steel	2019		Conference Paper	English	1	Salgar-Chaparro S.J., Machuca L.L., Lepkova K., Pojtanabuntoeng T., Darwin A.
587	Relative performance of various 16S ITAG amplicon sequencing primer pairs in profiling microbial communities relevant to oil & gas operations	2019		Conference Paper	English	0	Manna K., Moore J., Wunch K., Massie-Schuh E., Daly R.A., Wrighton K., Wilkins M.
592	Maintaining well & facility health – The application of DNA analysis to corrosion and bio-fouling prevention	2019		Conference Paper	English	1	Hofmann A., van Strien W.J.
597	Title: Growth of algae for biofuel production in highly saline oilfield fracking wastewater	2019		Conference Paper	English	0	Hopkins T., Schuler A.
599	Augmenting Librispeech with French translations: A multimodal corpus for direct speech translation evaluation	2019		Conference Paper	English	21	Kocabiyikoglu A.C., Besacier L., Kraif O.
644	Use of some additives for improving mesenchymal stem cell isolation outcomes in non-mobilized peripheral blood	2018		Article	English	3	Pouryazdanpanah N., Vahidi R., Dabiri S., Derakhshani A., Farsinejad A.
659	Microbial diversity of long-duration gas injection oil reservoir based on next generation sequencing in South of Iran	2018		Article	English	2	Pournia M., Bahador N., Salekdeh G.H.
667	Growth and metabolic characteristics of hydrocarbon degrading bacteria isolated from an oil refinery soil	2018		Article	English	1	Kora A.J.
701	Effect of sample storage conditions on the molecular assessment of MIC	2018		Conference Paper	English	1	Salgar-Chaparro S., Machuca L.L.
705	Self-healing biocement and its potential applications in cementing and sand-consolidation jobs: A review targeted at the oil and gas industry	2018		Conference Paper	English	4	Noshi C.I., Schubert J.J.
706	Comparison of integrated and sequential design approaches for fatigue analysis of a jacket offshore wind turbine structure	2018		Conference Paper	English	5	Glisic A., Nguyen N.-D., Schaumann P.
710	Relationship between chemical characteristics of formation water and natural gas accumulation within shan 2 member of shanxi formation in North Yulin Gas Field	2018		Article	Chinese	1	Meng W., Li Y., Fu G., Li J.
711	Petroleum microbiology and genetics	2018		Book Chapter	English	0	Marques J.M., Paixão C.T.M., Palma Pantoja G.V.M., Da Costa Da Silva A.L., Das Graças D.A.
756	Extra virgin olive oil and hepatoprotective effects	2017		Book Chapter	English	0	Soto-Alarcón S.A., Valenzuela R., Valenzuela A.
811	Identification of compounds that effectively block microbial H2S production	2017		Conference Paper	English	4	Geissler B.
812	Oil & gas water injection treatment system case study: Field trial comparing biocide/UV disinfection and new monitoring techniques for mitigating MIC and reservoir souring	2017		Conference Paper	English	0	Croese E., De Vries H., Robertson T., Hennessey P., Eilers J., Joldersma A., Doddema S.
813	Use of a methodological panel to identify the source of problematic microbial contamination in an oil shale field	2017		Conference Paper	English	1	Fichter J., Janes C., Summer E.J., Mills A., Hamblen G.
814	Quantification of microbiologically influenced corrosion in injection water pipelines	2017		Conference Paper	English	2	Thomsen U.S., Markfoged R., Meng R.L.C.
821	Modelling of microbiological method of oil recovery improvement	2017		Article	English	3	Milovanovich E.V., Maksimova S.N.
827	Anti-quorum sensing activity of substances isolated from wild berry associated bacteria	2017		Article	English	15	Abudoleh S.M., Mahasneh A.M.
900	Steps towards an Arthrobacter nicotinovorans based biotechnology for production of 6-hidroxy-nicotine	2016		Conference Paper	English	1	Mihalache G., Stefan M., Babii C., Motei D., Alexandru M.M.
901	Automated scoring across different modalities	2016		Conference Paper	English	10	Loukina A., Cahill A.
908	Monitoring and risk assessment of microbiologically influenced corrosion in offshore pipelines	2016		Conference Paper	English	6	Thomsen U.S., Meng R.L.C., Larsen J.
909	Prevalence and distribution of sulfide generating microbes in the oil and gas industry	2016		Conference Paper	English	2	Geissler B., Jones A.M., Keasler V.
925	Culture-independent-based analyses identified site-specific microbial in two oil-wells from Malaysia	2015		Article	English	0	Fish-Low C.-Y., Hamzah A., Chee H.-Y.
945	Impact of a microbial-enhanced oil recovery field trial on microbial communities in a low-temperature heavy oil reservoir	2015		Article	English	15	Chai L., Zhang F., She Y., Banat I.M., Hou D.
984	Biodegradation of hydrocarbons: Clean promising depollution technology for a sustainable management of environment in oil & gas industry	2015		Conference Paper	English	0	Mansour D., Djenane D., Nasrallah N., Zouad H., Boutrif A.
985	Inhibition of T4ss gene Legionella pneumophila with catalytical ozonization	2015		Article	English	2	Gholinezhad M., Esmaeli D., Ghanizadeh G.
998	Visualization and quantification of biofilm removal for the mitigation of MIC	2015		Conference Paper	English	7	Tidwell T.J., De Paula R.M., Nilsen G.P., Keasler V.V.
1055	Improving the methods of searching and development in Shirotnoye Priobie based on fault-block tectonics of natural reservoirs	2014		Article	Russian	0	Popov I.P., Tomilov A.A., Avershin R.V., Popov A.I.
1061	Oil biodegradation by Arctic marine microorganisms	2014		Conference Paper	English	0	McFarlin K.M., Perkins R.A., Leigh M.B.
1087	Characteristics and metabolic pathways of fluorene (FLU)degradation by strain Rhodococcussp. USTB-C isolated from crude oil	2014		Article	English	2	Yu C., Yao J., Jin J.
1089	Inhibition of the activity of sulfate-reducing bacteria in produced water from oil reservoir by nitrate	2014		Article	Chinese	4	Yang D.-Y., Zhang Y., Shi R.-J., Han S.-Q., Li G.-Z., Li G.-Q., Zhao J.-Y.
1115	Corrosion of linepipe carbon steel (X52) influenced by a SRB consortium isolated from a sour oil well	2013		Conference Paper	English	2	Alabbas F.M., Kakpovbia A., Williamson C., Mishra B., Olson D.L.
1116	Microbial community associated with corrosion products collected from sour oil crude and seawater injection pipelines	2013		Conference Paper	English	0	Alabbas F.M., Kakpovbia A., Williamson C., Spear J.R., Mishra B., Olson D.L.
1132	A brief review on the science, mechanism and environmental constraints of microbial enhanced oil recovery (MEOR)	2013		Article	English	8	Saikia U., Bharanidharan R., Vendhan E., Kumar Yadav S., Siva Shankar S.
1145	1st International Conference on Petroleum and Mineral Resources, ICPMR 2012	2013		Conference Review	English	0	[No author name available]
1148	Injection water indigenous bacteria; novel electrical energy source in Algerian oil fields	2013		Conference Paper	English	0	Mansour D., Laadjal adjal F., Bounoughaz M., Cheikh Bokal R., Chikhi S.
1153	Microbial utilization of the oil wastes in the conditions of Arctic temperature	2013		Conference Paper	English; Russian	0	Vinogradova E.N., Abramov S.M., Sadraddinova E.R., Fedorenko V.N., Shestakov A.I.
1155	Obesity in the oil and gas industry population	2013		Conference Paper	English	0	França A.M., Frigotto G., Zambrano Celly J.J.
1170	Presence and survival of Legionella in drinking water distribution systems	2012		Conference Paper	English	1	Schwake O., Alum A., Dunkin N., Kraft K., Abbaszadegan M.
1171	The influence of abiotic factors on soil microorganism in wet meadows contaminated by petroleum in the west Songnen Plain	2012		Article	Chinese	1	Chu J.-M., Li X.-J., Liu X.-T., Zhao P.-F., Wang M.
1183	Methane production pathway in biogas reservoirs via molecular biological technique	2012		Article	Chinese	0	Wei X., Qin J., Shuai Y., Liu K., Luo Y., Shi Y., Zhang S.
1195	Molecular analysis of crude oil and produced water for sulphidogenic bacteria	2012		Article	English	0	Akinnibosun F.I., Lappin-Scott H.M.
1201	Research on population structure and distribution characteristic of indigenous microorganism in post-polymer-flooding oil reservoir	2012		Article	Chinese	7	Zhao L.-X., Gao P.-K., Cao M.-N., Gao M.-L., Li G.-Q., Zhu X.-D., Ma T.
1207	Mathematical modeling of Microbial processes for oil recovery	2012		Conference Paper	English	2	Huang C., Monteagudo J.
1209	The effects of crude oil and corexit 9500 on the indigenous arctic microbial community	2012		Conference Paper	English	0	McFarlin K.M., Perkins R.A., Leigh M.B., Word J.Q.
1212	[A new method of microbial prospecting for oil and gas based on BIOLOG metabolic fingerprinting analysis].	2012		Article	Chinese	0	Liao X., Zhang T., Zeng J., Sun J., Hu W., Lou K.
1216	Relationship between hydrochemical characteristics of Majiagou formation water in Lower Paleozoic in Sulige region and natural gas accumulation	2012		Article	Chinese	8	Zhao W.-W., Wang X.-J., Yang Z.-L., Wang K.
1218	Bacterial metabolism and corrosion: An overview	2011		Conference Paper	English	0	Beech I.B.
1219	Carbon source utilization characteristics of microbial communities in a petroleum-contaminated soil in Daqing Oil Field, Northeast China	2011		Article	Chinese	5	Yue B.-B., Li X., Ren F.-F., Meng F.-J., Yin P.-D., Zhang H.-H., Sun G.-Y.
1237	Identification of microorganisms and their effects on corrosion of carbon steels pipelines	2011		Conference Paper	English	11	Almahamedh H.H., Williamson C., Spear J.R., Mishra B., Olson D.L.
1240	[Microbial metabolic characteristics and ecological controlling in petroleum reservoir--a review].	2011		Review	Chinese	11	Gao P., Ma T., Liu R.
1246	Evaluation on effects of different carbon source on activating indigenous bacteria in Zhongyi block of Shengli Oilfield	2011		Article	Chinese	6	Bao M., Yuan S., Song Z., Li X.
1256	New technologies for biocidal treatments	2011		Conference Paper	English	0	Oliveira A.P., Tooge C., Campos D., Pinto F.F., Lavach F., Andrade G., Stankevicius J.L.
1266	Detection of SRP activity by quantification of mRNA for the dissimilatory (bi) sulfite reductase gene (dsrA) by reverse transcription quantitative PCR	2010		Conference Paper	English	3	Price A., Álvarez L.A., Whitby C., Larsen J.
1267	Detection of SRP activity by quantification of mRNA for the dissimilatory (bi) sulfite reductase gene (dsrA) by reverse transcription quantitative PCR	2010		Conference Paper	English	2	Price A., Álvarez L.A., Whitby C., Larsen J.
1268	Microbiologically influenced corrosion of carbon steel in aqueous natural gas plant	2010		Conference Paper	English	0	Tanji Y., Handa T., Miyanaga K.
1272	[Isolation and identification of a thermophilic anaerobic bacterium].	2010		Article	Chinese	0	Liu H., Lan G., Liu Q., Cao Y., Deng Y., Zhang H.
1281	Effect of wettability and interfacial tension on microbial improved oil recovery with Rhodococcus sp 094	2010		Conference Paper	English	8	Shabani Afrapoli M., Alipour S., Torsaeter O.
1282	Isolation and identification of a methanogen from the high temperature oil reservoir water	2010		Article	Chinese	2	Liu H., Lan G., Liu Q., Zhang W., Cao Y., Deng Y., Zhang H.
1287	Diabetes type 2 pandemic in 21st century	2010		Article	English	44	Ginter E., Simko V.
1308	Isolation and identification of a sulfate reducing bacteria and sequence analysis of its dissimilatory sulfite reductase gene	2009		Article	English	0	Wei L., Ma F., Wei J.-C., Li Y.-P., Firdoz S., Lv X.-L.
1309	Petroleum biodegradation by two mycobacterium isolates from Persian Gulf	2009		Article	Persian	0	Abolhasani Soorki A., Ebrahimipour G.H.
1312	Dissolved gas delivery for in situ bioremediation: Process equipment and subsurface modeling	2009		Conference Paper	English	0	Dynkin B., Henn K.
1313	Successful bioremediation of a dilute 44-acre plume	2009		Conference Paper	English	0	Fam S.A., Falatko D., Blackburn J., Pon G., Gaudette M.
1314	The application of bioassays for evaluating in-situ biocide efficiency in offshore oil production in the north sea	2009		Conference Paper	English	10	Hansen L.H., Larsen J., Jensen M., Thomsen U.S., Sørensen K., Lundgaard T., Skovhus T.L.
1330	Significance of troublesome sulfate-reducing prokaryotes (SRP) in oil field systems	2009		Conference Paper	English	23	Larsen J., Sørensen K., Højris B., Skovhus T.L.
1333	Significance of troublesome sulfate-reducing prokaryotes (SRP) in oil field systems	2009		Conference Paper	English	3	Larsen J., Søorensen K., Højris B., Skovhus T.L.
1337	Detection of soil petroleum-degrading bacteria with fluorescence in situ hybridization technique	2009		Article	Chinese	0	Zhang L.-Y., Bai Y.-X., Yang X.-L., Li F.-M., Guo S.-H.
1338	Application of PCR-DGGE in selective activation of stratal bacteria	2009		Article	Chinese	0	Bao M.-T., Wang B., Chen Q.-G., Gao G.-J., Li X.-M.
1339	Effects of pressure on growth and metabolism of microorganism for microbial enhanced oil recovery	2009		Article	Chinese	3	Wang D.-Q., Guo L.-Y., Liu T., Duan C.-H., Zhang J., Song Z.-Y.
1348	Characteristics of indigenous microorganisms for enhancing oil recovery after polymer flood in Daqing oilfield	2009		Article	Chinese	3	She Y.-H., Xia J.-J., Huang J.-F., Wang Z.-L., Zhang F., Wang W.-J., Wang H.-Z.
1355	Investigations on microbiological degradation of polymers applied in drilling fluids technology [Badania procesów mikrobiologicznej degradacji polimerów stosowanych w technologii płynów wiertniczych]	2009		Article	Polish	2	Kapusta P., Turkiewicz A.
1364	Vascular involvement in chronic kidney disease - mineral and bone disorder [Cévní postižení při minerá lové a kostní nemoci u chronického onemocnění ledvin]	2008		Review	Czech	2	Zahálková J.
1386	From polymeric to particulate inorganic macrocellular foams: Some integrative chemistry synthetic pathways	2008		Conference Paper	English	0	Carn F., Backov R.
1410	Isolation of functional bacteria guided by PCR-DGGE technology from high temperature petroleum reservoirs	2008		Article	Chinese	8	Wang J., Ma T., Liu J., Liu Q.-K., Zhao L.-X., Liang F.-L., Liu R.-L.
1414	Molecular diversity of bacterial communities from subseafloor rock samples in a deep-water production basin in Brazil	2008		Article	English	23	Von Der Weid I., Korenblum E., Jurelevicius D., Rosado A.S., Dino R., Sebastián G.V., Seldin L.
1415	Isolation of a thermophilic bacterium and analysis of its extracellular polymeric substance	2008		Article	Chinese	3	Liu J., Wang J., Bai X., Ma T., Liang F., Liu R.
1420	Application of molecular microbiology techniques as tools for monitoring oil field bacteria	2007		Conference Paper	English	9	Hoffmann H., Devine C., Maxwell S.
1421	Remediation of a chlorinated solvent source area using in situ accelerated anaerobic biodegradation at dover air force base, delaware	2007		Conference Paper	English	0	Bloom A., Delong G., Lyon R., Buell A.
1439	Use of microbial DMA probes as a potential new tool in oil exploration and characterization	2007		Conference Paper	English	2	Kotlar H.K., Brakstad O.G., Markussen S.
1446	Recovery mechanism and application of Brevibacillus brevis and Bacillus cereus in extra-low permeability reservoir of Daqing	2007		Article	Chinese	17	Guo W.-K., Hou Z.-W., Shi M., Wu X.-L.
1450	Practical use of new microbiology tools in oil production	2007		Conference Paper	English	0	Skovhus T.L., Højris B., Saunders A.M., Thomsen T.R., Agerbæk M., Larsen J.
1451	Microbial diversity in shengli petroleum reservoirs analyzed by T-RFLP	2007		Article	Chinese	16	Yuan S.Q., Xue Y.F., Gao P., Wang W.D., Ma Y.H., Li X.M., Xu G.W.
1458	Forecasting the effect of produced water reinjection on reservoir souring in the ekofisk field	2006		Conference Paper	English	6	Burger E.D., Vedvik A., Jenneman G.E., Bache Ø., Voldum K.
1459	Reservoir sedimentation: 1D model of turbidity currents and delta deposits	2006		Conference Paper	English	2	González J., Tamburrino A., Niño Y.
1460	The salinity of groundwater in Mesozoic and Cenozoic aquifers of NW Poland - Origin and evolution	2006		Article	English	10	Kaczor D.
1461	Study on authigenous microorganism community distribution and oil recovery mechanism in Daqing Oilfield	2006		Article	Chinese	14	Yang Z., Shi M., Wang D., Chang J., Dou X.
1465	Combined microbial surfactant-polymer system for improved oil mobility and conformance control	2006		Conference Paper	English	6	Gabitto J.F.
1467	Microbial enhanced oil recovery techniques improve production	2006		Article	English	4	Mokhatab S., Giangiacomo L.A.
1472	Results of indigeneous microbes flood trial project at faulted block 1 in Gangxi-3 District of Dagang	2006		Article	Chinese	2	Liu M., Li H., Gao Y.-C., Wang J.-J., Liang J.-C., Ten K.-M.
1479	The submarine hydrothermal system of Panarea (Southern Italy): Biogeochemical processes at the thermal fluids-sea bottom interface	2006		Article	English	39	Gugliandolo C., Italiano F., Maugeri T.L.
1480	NTP technical report on the toxicology and carcinogenesis studies of 2,3,7,8-tetrachlorodibenzo-p-dioxin (TCDD) (CAS No. 1746-01-6) in female Harlan Sprague-Dawley rats (Gavage Studies).	2006		Article	English	60	[No author name available]
1483	Effect of electrochemical oxidation potential on biofilter for bacteriological oxidation of VOCs to CO2	2006		Article	English	4	Kang H.S., Lee J.K., Kim M.H., Park D.H.
1487	Phylogenetic diversity and activity of anaerobic microorganisms of high-temperature horizons of the Dagang Oilfield (China)	2006		Article	Russian	33	Nazina T.N., Shestakova N.M., Grigor'ian A.A., Mikhaǐlova E.M., Turova T.P., Poltaraus A.B., Feng C., Ni F., Beliaev S.S.
1489	Genome-wide screening for solvent tolerance genes in Clostridium acetobutylicum	2005		Conference Paper	English	0	Borden J.R., Papoutsakis E.T.
1490	The phylogenetic diversity of aerobic organotrophic bacteria from the Dagan high-temperature oil field	2005		Article	Russian	11	Nazina T.N., Sokolova D.Sh., Shestakova N.M., Grigoryan A.A., Mikhailova E.M., Babich T.L., Lysenko A.M., Tourova T.P., Poltaraus A.B., Feng T., Ni F., Belyaev S.S.
1493	Effective chemistries to control SRB, H2S and Fe xSy problems	2005		Conference Paper	English	6	Dickinson A., Peck G., Arnold B.
1495	Analysis for causes of floccules creation in mixed produced and injection water at offshore oil field SZ36-1 of Bohai	2005		Article	Chinese	1	Zhao L., Li Z.-W., Cheng Y.
1499	Biological and toxicological considerations of dietary sulfur	2005		Book Chapter	English	5	Komarnisky L.A., Basu T.K.
1500	Molecular analysis of the microbial communities of the Dagang Kongdian flooding bed oilfield	2005		Article	Chinese	13	She Y.H., Zhang X.L., Zhang F., Wang L.H., Zhao L.P.
1504	Iron-reducing bacteria - Ecology, significance and potential uses	2004		Conference Paper	English	1	Greene A.C., Ogg C.D., Lynch K.M., Pope P.B., Patel B.K.C.
1513	Optimization method of modifying 3-D horizontal wells trajectory while drilling and its application	2004		Article	Chinese	5	Qian W.-Y., Feng E.-M., Wei Y.-H.
1516	Anaerobe chain formation in reservoir environment and its relation to enhancement in oil recovery by cyclic microbe injection in block L801	2004		Article	Chinese	3	Song Y.-T., Wei B., Zhao F.-M., Wang J., Duan C.-H.
1533	Metabolic activity assessment (H 2S production) of mixed cultures of sulfate reducing bacteria (SRB) [Avaliação da atividade metabólica (produção de H 2S) de culturas mistas de bactérias redutoras de sulfato (BRS)]	2003		Article	Portuguese; English; Spanish	0	De Oliveira Penna M., Barreto De Oliveira H., Domingos Da Silva E.
1537	Phylogenetic diversity of aerobic saprotrophic bacteria isolated from the Daqing oil field	2002		Article	Russian	28	Nazina T.N., Grigor'yan A.A., Sue K.-F., Sokołova D.Sh., Novikova E.V., Tourova T.P., Poltaraus A.B., Belyaev S.S., Ivanov M.V.
1542	Control of microbially induced corrosion in seawater injection systems using electrochemical noise technology	2002		Conference Paper	English	0	Eden D.A., Moody S.S.
1543	Study on EOR mechanisms by microbial flooding	2002		Conference Paper	English	16	Feng Q.-X., Zhou J.-X., Chen Z.-Y., Wang X.-L., Ni F.-T., Yang H.-J.
1547	Hydrochemical characteristics of lower Paleozoic formation water and idendification of natural gas enrichment area in central gas fields in E' erduosi	2002		Article	Chinese	8	Li X., Hou D., Hu G., Liu C.
1548	Seed transmission and natural reservoirs of Zucchini yellow mosaic virus in Cucurbita pepo var. styriaca	2002		Article	English	12	Riedle-Bauer M., Suarez B., Reinprecht H.J.
1551	Contamination of the Caspian Sea ecosystem with organic pollutants	2001		Conference Paper	English	1	Lebedev A.T., Poliakova O.V., Dianova I.V.
1552	Microbiology of Oil Degradation in Reservoirs	2001		Conference Paper	English	2	Blanchet D., Grabowski A., Vandecasteele J.-P.
1556	Technology applications: Simulation products	2001		Note	English	0	[No author name available]
1559	Study of internal MIC in pipelines of sour gas, mixed with formation waters	2001		Conference Paper	English	3	Mora-Mendoza J.L., García-Esquivel R., Padilla-Viveros A.A., Martínez L., Martínez-Bautista M., Angeles-Ch C., Flores O.
1565	Application of microbial oil producing in North China oil field	2000		Article	Chinese	1	Liang H.-Z., Xie J., Li J.-Z.
1566	Diversity and activity of microorganism in the daqing oil field of China and their potential for biotechnological applications	2000		Article	English	14	Nazina T.N., Xue Y.F., Wang X.-Y., Grigoriyan A.A., Ivoilov V.S., Belyaev S.S., Ivonov M.V.
1575	Metabolic products from petroleum hydrocarbons in oil polluted soil	1999		Article	English	0	Porta A., Trovato A., Neff J.M.
1576	Marinobacter aquaeolei sp. nov., a halophilic bacterium isolated from a Vietnamese oil-producing well	1999		Article	English	176	Stan-Lotter H.
1592	Text segmentation using exponential models	1997		Conference Paper	English	66	Beeferman D., Berger A., Lafferty J.
1596	New solution to sour gas wells	1997		Conference Paper	English	0	Hitzman Donald O., Dennis D.Michael
1597	Mutagenic potential as an integral index of soil pollution by oil components	1996		Article	English	1	Ivanchenko O.B., Il'Inskaya O.N., Karamova N.S., Kostyukevich I.I.
1598	Feasibility of microbially improved oil recovery (MIOR) in Northern German oil reservoirs [Bakterien zur erhöhung des entölungsgrades in norddeutschen erdöllagerstätten]	1996		Article	German	1	Amro M., Kessel D.
1603	Halophilic archaebacteria from the Kalamkass oilfield [Galfil'nye arkhebakterii neftianogo mestorozhdeniia Kalamkass.]	1995		Article	Russian	24	Zviagintseva I.S., Beliaev S.S., Borzenkov I.A., Kostrikina N.A., Milekhina E.I., Ivanov M.V.
1620	Sulfate reducing bacteria in oil production plants	1991		Article	English	0	Kleinitz W., Bak F.
1623	Assessing the effects of microbial metabolism and metabolities on reservoir pore structure	1991		Conference Paper	English	15	Udegbunam E.O., Adkins J.P., Knapp R.M., McInerney M.J., Tanner R.S.
1625	Microbial enhanced oil recovery. Interfacial tension and gas-induced relative permeability effects	1990		Conference Paper	English	17	Chisholm J.L., Kashikar S.V., Knapp R.M., McInerney M.J., Menzie D.E., Silfanus N.J.
1626	Wave and current forces on conductor pipe groups	1990		Conference Paper	English	1	Reed K., Aarsnes J.V., Beltrand O., Andersen E.
1633	SATELLITE TECHNOLOGY APPLIED AT THE WELL SITE.	1988		Article	English	0	Linger Daniel B., Dill Paul H.
1635	IMPROVED MONITORING OF BACTERIALLY MEDIATED CORROSION RISKS IN OFFSHORE SYSTEMS.	1986		Article	English	1	Maxwell Stephen
1638	INFLUENCE OF gamma IRRADIATION ON THE METABOLIC ACTIVITY OF SULFATE-REDUCING BACTERIA.	1985		Article	English	2	Agaev N.M., Smorodin A.E., Guseinov M.M.
1639	ISOLATION AND SCREENING OF CLOSTRIDIA FOR POSSIBLE USE IN MICROBIALLY ENHANCED OIL RECOVERY.	1983		Conference Paper	English	23	Grula E.A., Russell H.H., Bryant D., Kenaga M., Hart M.
1640	COMBINED EFFECTS OF TEMPERATURE AND OTHER ENVIRONMENTAL STRESSES ON MICROBIOLOGICALLY ENHANCED OIL RECOVERY.	1983		Conference Paper	English	21	Bubela B.
1641	PETROLEUM MICROBIOLOGY AND THE HISTORY OF ITS ROLE IN ENHANCED OIL RECOVERY.	1983		Conference Paper	English	54	Hitzman D.O.
1644	Rainbow keg river "b" pool liydrocarbon miscible flood project	1982		Conference Paper	English	0	Betlu M., Ramler L., Barden I.
1648	A comparison of the effects of glucose and acetylcholine on insulin release and intermediary metabolism in rat pancreatic islets	1979		Article	English	24	Trus M.D., Hintz C.S., Weinstein J.B., Williams A.D., Pagliara A.S., Matschinsky F.M.
1649	COMPUTER FILE OF OIL RESERVOIR FLUID PROPERTY DATA.	1978		Article		0	Burger David H., Heidemann Robert A., Aziz Khalid
1650	Measurement of metabolites in single preimplantation embryos; a new means to study metabolic control in early embryos	1978		Article	English	92	Barbehenn E.K., Wales R.G., Lowry O.H.

## Sheet: Duplicates
Item	Title	Year	DOI	Document Type	Language	Cited By	Author(s)	Duplicate Type
574	Validation of numerical models of the offshore wind turbine from the Alpha ventus wind farm against full-scale measurements within OC5 phase III	2019	10.1115/omae2019-95429	Conference Paper	English	3	Popko W., Robertson A., Jonkman J., Wendt F., Thomas P., Müller K., Kretschmer M., Hagen T.R., Galinos C., Le Dreff J.-B., Gilbert P., Auriac B., Oh S., Qvist J., Sørum S.H., Suja-Thauvin L., Shin H., Molins C., Trubat P., Bonnet P., Bergua R., Wang K., Fu P., Cai J., Cai Z., Alexandre A., Harries R.	By Title
620	Taxonomical Diversity of Extremophiles in the Deep Biosphere	2018	10.1016/b978-0-12-814849-5.00035-6	Book Chapter	English	5	Govil T., Rathinam N.K., Salem D.R., Sani R.K.	By DOI
799	Integrated methodology to characterize microbial populations and functions across small spatial scales in an oil production facility	2017	10.1201/9781315157818	Book Chapter	English	1	Marks C.R., Cooper J.T., Bonifay V., Stamps B.W., Le H.M., Harriman B.H., de Capite A., Brown K.R., Aktas D.F., Sunner J., Stevenson B.S., Duncan K.E., McInerney M.J., Gunaltun Y., Souquet P., Suflita J.M.	By DOI
800	MIC monitoring: Developments, tools, systematics, and feedback decision loops in offshore production systems	2017	10.1201/9781315157818	Book Chapter	English	0	De Paula R., Keasler V.	By DOI
801	Application of biocides and chemical treatments to both combat microorganisms and reduce (bio)corrosion	2017	10.1201/9781315157818	Book Chapter	English	10	Morris B.E.L., van der Kraan G.M.	By DOI
916	Isolation, identification, and crude oil degradation characteristics of a high-temperature, hydrocarbon-degrading strain	2016	10.1016/j.marpolbul.2015.09.053	Article	English	48	Liu B., Ju M., Liu J., Wu W., Li X.	By DOI
1607	Developing a field strategy to eliminate crossflow along a horizontal well	1994	10.2118/hwc-94-24	Conference Paper	English	8	Wong F.Y., Fong D.K.	By Title
