# Supplementary material for: Metabolically Active Microbial Communities in Oilfields: A Systematic Review and Synthesis of RNA Preservation, Extraction, and Sequencing Methods
Source: MDPI journal article supplement (doi:10.3390/applmicrobiol3040079), 2023-10-06
Supplement: s1 [file s1 › Table S4. script format_input_web of science.xlsx]

## Sheet: Detail
Item	Title	Year	DOI	Document Type	Language	Cited By	Author(s)
1	High quality genome sequence and description of Enterobacter mori strain 5-4, isolated from a mixture of formation water and crude-oil	2015	10.1186/1944-3277-10-9	Article	English	3	Zhang, F; Su, SB; Yu, GM; Zheng, BW; Shu, FC; Wang, ZL; Xiang, TS; Dong, H; Zhang, ZZ; Hou, DJ; She, YH
2	Effects of oxygen injection on oil biodegradation and biodiversity of reservoir microorganisms in Dagang oil field, China	2015	10.1016/j.ibiod.2014.12.003	Article	English	12	Cai, MM; Yu, C; Wang, RX; Si, YX; Masakorala, K; Yuan, HY; Yao, J; Zhang, JB
3	Microbial community composition and diversity in production water of a high-temperature offshore oil reservoir assessed by DNA- and RNA-based analyses	2020	10.1016/j.ibiod.2020.104970	Article	English	14	Zhou, L; Lu, YW; Wang, DW; Zhang, SL; Tang, EG; Qi, ZZ; Xie, SN; Wu, J; Liang, B; Liu, JF; Yang, SZ; Zhang, J; Gu, JD; Mu, BZ
4	A cost-effective and environmentally sustainable process for phycoremediation of oil field formation water for its safe disposal and reuse	2019	10.1038/s41598-019-51806-5	Article	English	10	Das, B; Deka, S
5	Bisulfite reductase gene expression of thermophilic sulphate-reducing bacteria from saline connate water of oil reservoirs with high temperature	2016	10.1016/j.ibiod.2015.05.029	Article	English	6	Zapata-Penasco, I; Salazar-Coria, L; Saucedo-Garcia, M; Villa-Tanaca, L; Hernandez-Rodriguez, C
6	Tracing microbial hydrocarbon transformation processes in a high temperature petroleum reservoir using signature metabolites	2017	10.1016/j.orggeochem.2017.03.003	Article	English	8	Gruner, A; Jarling, R; Vieth-Hillebrand, A; Mangelsdorf, K; Janka, C; van der Kraan, GM; Kohler, T; Morris, BEL; Wilkes, H
7	Application of microbial enhanced oil recovery technique to Daqing Oilfield	2002	10.1016/s1369-703x(02)00025-6	Article; Proceedings Paper	English	53	Li, QX; Kang, CB; Wang, H; Liu, CD; Zhang, CK
8	Microbial communities in crude oil phase and filter-graded aqueous phase from a Daqing oilfield after polymer flooding	2022	10.1111/jam.15603	Article	English	0	Wei, YF; Wang, L; Xia, ZY; Gou, M; Sun, ZY; Lv, WF; Tang, YQ
9	Genome sequence of Brevibacillus agri strain 5-2, isolated from the formation water of petroleum reservoir	2014	10.1016/j.margen.2014.08.006	Article	English	6	She, YH; Wu, WQ; Hang, CC; Jiang, XW; Chai, LJ; Yu, GM; Shu, FC; Wang, ZL; Su, SB; Xiang, TS; Zhang, ZZ; Hou, DJ; Zhang, F; Zheng, BW
10	Diversity of Metabolically Active Bacteria in Water-Flooded High-Temperature Heavy oil Reservoir	2017	10.3389/fmicb.2017.00707	Article	English	33	Nazina, TN; Shestakova, NM; Semenova, EM; Korshunova, AV; Kostrukova, NK; Tourova, TP; Min, L; Feng, QX; Poltaraus, AB
11	Complementary DNA/RNA-Based Profiling: Characterization of Corrosive Microbial Communities and Their Functional Profiles in an Oil Production Facility	2019	10.3389/fmicb.2019.02587	Article	English	12	Salgar-Chaparro, SJ; Machuca, LL
12	Bacterial communities in a crude oil gathering and transferring system (China)	2009	10.1016/j.anaerobe.2009.03.007	Article	English	21	Liu, YJ; Chen, YP; Jin, PK; Wang, XC
13	Diversity of sulfate-reducing prokaryotes in petroleum production water and oil samples	2020	10.1016/j.ibiod.2020.104966	Article	English	8	dos Santos, JC; Lopes, DRG; Da Silva, JD; De Oliveira, MD; Dias, RS; Lima, HS; De Sousa, MP; De Paula, SO; da Silva, CC
14	Role of thermophilic bacteria (Bacillus and Geobacillus) on crude oil degradation and biocorrosion in oil reservoir environment	2019	10.1007/s13205-019-1604-0	Article	English	26	Elumalai, P; Parthipan, P; Narenkumar, J; Anandakumar, B; Madhavan, J; Oh, BT; Rajasekar, A
15	Microbial community diversity and potential bioremediation of drill cuttings in two oil reservoirs	2022	10.1080/10916466.2021.2024228	Article	English	0	Deng, SY; Wang, B; Su, SB; Zeng, H; Chen, R; Ma, HF; Hu, YJ; Zheng, AY; Shu, CC; Zou, J; Li, Y; Zhu, H; Sun, SS; She, YH; Zhang, F
16	Bacterial and Archaeal Community Distribution in Oilfield Water Re-injection Facilities and the Influences from Microorganisms in Injected Water	2022	10.1007/s00248-021-01933-2	Article	English	2	Gao, PK; Li, Y; Tian, HM; Li, GQ; Zhao, F; Xia, WJ; Pan, XL; Gu, JD; Le, JJ; Jia, CX; Ma, T
17	Species Divergence vs. Functional Convergence Characterizes Crude Oil Microbial Community Assembly	2016	10.3389/fmicb.2016.01254	Article	English	16	Nie, Y; Zhao, JY; Tang, YQ; Guo, P; Yang, YF; Wu, XL; Zhao, FQ
18	Degradation of hydrocarbons by indigenous microbial communities from two adjacent oil production wells in one block	2016	10.1080/15567036.2014.943853	Article	English	1	Liu, HJ; Yao, J; Yuan, ZM; Chen, HL; Wang, F; Masakorala, K; Choi, MMF
19	Hydrocarbon-utilizing bacteria of natural crude oil seepages, Digboi oilfield, Northeastern region of India	2020	10.1007/s43217-020-00013-8	Article	English	5	Bhagobaty, RK
20	Microbial diversity in the anaerobic tank of a full-scale produced water treatment plant	2010	10.1016/j.procbio.2010.01.010	Article	English	22	Liu, RY; Li, D; Gao, YX; Zhang, Y; Wu, S; Ding, R; Hesham, AEL; Yang, M
21	Investigation of Biosurfactant-Producing Indigenous Microorganisms that Enhance Residue Oil Recovery in an Oil Reservoir After Polymer Flooding	2011	10.1007/s12010-010-9032-y	Article	English	47	She, YH; Zhang, F; Xia, JJ; Kong, SQ; Wang, ZL; Shu, FC; Hu, JM
22	Petroleum migration and accumulation in the Liuchu area of Raoyang Sag, Bohai Bay Basin, China	2020	10.1016/j.petrol.2020.107276	Article	English	4	Song, JY; Huo, ZP; Fu, G; Hu, M; Sun, TW; Liu, Z; Wang, W; Liu, LF
23	Assessment of bioremediation potential of petroleum-contaminated soils from the shanbei oilfield of China revealed by qPCR and high throughput sequencing	2022	10.1016/j.chemosphere.2022.136446	Article	English	0	Wu, ML; Liu, ZL; Gao, H; Gao, JH; Xu, YR; Ou, YW
24	Dominant and Active Methanogens in the Production Waters From a High-Temperature Petroleum Reservoir by DNA- and RNA-Based Analysis	2021	10.1080/01490451.2020.1822958	Article	English	1	Zhou, L; Hu, QQ; Lu, YW; Mbadinga, SM; Liu, YF; Li, XX; Wang, B; Lv, HM; Liu, JF; Yang, SZ; Gu, JD; Mu, BZ
25	Bacterial Community Composition in Produced Water of Diyarbakir Oil Fields in Turkey Bacterial communities in produced waters of south-eastern Turkey reported in detail for the first time	2020	10.1595/205651320x15911723486216	Article	English	1	Tuccar, T; Ilhan-Sungur, E; Muyzer, G
26	Microbial response to reinjection of produced water in an oil reservoir	2009	10.1007/s00253-009-2015-7	Article	English	25	Lysnes, K; Bodtker, G; Torsvik, T; Bjornestad, EO; Sunde, E
27	Diversity and Composition of Sulfate-Reducing Microbial Communities Based on Genomic DNA and RNA Transcription in Production Water of High Temperature and Corrosive Oil Reservoir	2017	10.3389/fmicb.2017.01011	Article	English	33	Li, XX; Liu, JF; Zhou, L; Mbadinga, SM; Yang, SZ; Gu, JD; Mu, BZ
28	Firmicutes is an Important Component of Microbial Communities in Water-Injected and Pristine Oil Reservoirs, Western Siberia, Russia	2016	10.1080/01490451.2015.1045635	Article	English	23	Frank, Y; Banks, D; Avakian, M; Antsiferov, D; Kadychagov, P; Karnachuk, O
29	Study on bioadsorption and biodegradation of petroleum hydrocarbons by a microbial consortium	2013	10.1016/j.biortech.2013.09.024	Article	English	61	Xu, NN; Bao, MT; Sun, PY; Li, YM
30	In situ detection of anaerobic alkane metabolites in subsurface environments	2013	10.3389/fmicb.2013.00140	Review	English	43	Agrawal, A; Gieg, LM
31	Bacterial communities in petroleum oil in stockpiles	2005	10.1263/jbb.99.143	Article	English	66	Yoshida, N; Yagi, K; Sato, D; Watanabe, N; Kuroishi, T; Nishimoto, K; Yanagida, A; Katsuragi, T; Kanagawa, T; Kurane, R; Tani, Y
32	Molecular phylogenetic diversity of the microbial community associated with a high-temperature petroleum reservoir at an offshore oilfield	2007	10.1111/j.1574-6941.2006.00266.x	Article	English	110	Li, H; Yang, SZ; Mu, BZ; Rong, ZF; Zhang, J
33	Isolation and characterization of a crude oil degrading bacteria from formation water: comparative genomic analysis of environmental Ochrobactrum intermedium isolate versus clinical strains	2015	10.1631/jzus.b1500029	Article	English	7	Chai, LJ; Jiang, XW; Zhang, F; Zheng, BW; Shu, FC; Wang, ZL; Cui, QF; Dong, HP; Zhang, ZZ; Hou, DJ; She, YH
34	Characterization of the microbial community structure and the physicochemical properties of produced water and seawater from the Hibernia oil production platform	2015	10.1007/s11356-015-4947-z	Article	English	8	Yeung, CW; Lee, K; Cobanli, S; King, T; Bugden, J; Whyte, LG; Greer, CW
35	Biological souring and mitigation in oil reservoirs	2011	10.1007/s00253-011-3542-6	Review	English	185	Gieg, LM; Jack, TR; Foght, JM
36	Comparison of bacterial community in aqueous and oil phases of water-flooded petroleum reservoirs using pyrosequencing and clone library approaches	2014	10.1007/s00253-013-5472-y	Article	English	58	Wang, LY; Ke, WJ; Sun, XB; Liu, JF; Gu, JD; Mu, BZ
37	Enrichment of Potential Halophilic Marinobacter Consortium for Mineralization of Petroleum Hydrocarbons and Also as Oil Reservoir Indicator in Red Sea, Saudi Arabia	2022	10.1080/10406638.2020.1735456	Article	English	8	Jamal, MT
38	In depth metagenomic analysis in contrasting oil wells reveals syntrophic bacterial and archaeal associations for oil biodegradation in petroleum reservoirs	2020	10.1016/j.scitotenv.2020.136646	Article	English	16	Sierra-Garcia, IN; Belgini, DRB; Torres-Ballesteros, A; Paez-Espino, D; Capilla, R; Neto, EVS; Gray, N; de Oliveira, VM
39	Metabolic capability and in situ activity of microorganisms in an oil reservoir	2018	10.1186/s40168-017-0392-1	Article	English	52	Liu, YF; Galzerani, DD; Mbadinga, SM; Zaramela, LS; Gu, JD; Mu, BZ; Zengler, K
40	Microbial methanogenesis in subsurface oil and coal	2013	10.1016/j.resmic.2013.07.004	Review	English	78	Mesle, M; Dromart, G; Oger, P
41	Application of Bacillus spp. in Pilot Test of Microbial Huff and Puff to Improve Heavy Oil Recovery	2017	10.1021/acs.energyfuels.7b02517	Article	English	14	Sun, SS; Luo, YJ; Zhou, Y; Xiao, M; Zhang, ZY; Hou, JR; Wei, XF; Xu, QS; Sha, T; Dong, H; Song, H; Zhang, ZZ
42	MICROBIAL COMPOSITION OF CARBONATE PETROLEUM RESERVOIR FLUIDS	1992	10.1080/01490459209377909	Article	English	60	ADKINS, JP; CORNELL, LA; TANNER, RS
43	Identifying the core bacterial microbiome of hydrocarbon degradation and a shift of dominant methanogenesis pathways in the oil and aqueous phases of petroleum reservoirs of different temperatures from China	2019	10.5194/bg-16-4229-2019	Article	English	3	Zhou, ZC; Liang, B; Wang, LY; Liu, JF; Mu, BZ; Shim, H; Gu, JD
44	Microbial diversity and functionally distinct groups in produced water from the Daqing Oilfield, China	2012	10.1007/s12182-012-0232-7	Article	English	14	Li, H; Ai, MQ; Han, SQ; Guo, YL; Li, NN; Shi, RJ; Zeng, XL; Leng, SB; Zhao, JY; Liu, XB; Zhang, Y
45	Profiling of Indigenous Microbial Community Dynamics and Metabolic Activity During Enrichment in Molasses-Supplemented Crude Oil-Brine Mixtures for Improved Understanding of Microbial Enhanced Oil Recovery	2015	10.1007/s12010-015-1626-y	Article	English	6	Halim, AY; Pedersen, DS; Nielsen, SM; Lantz, AE
46	Characterizing the microbiome in petroleum reservoir flooded by different water sources	2019	10.1016/j.scitotenv.2018.10.410	Article	English	20	Wang, XT; Li, XZ; Yu, L; Huang, LX; Xiu, JL; Lin, W; Zhang, YM
47	Isolation, biodegradation ability and molecular detection of hydrocarbon degrading bacteria in petroleum samples from a Brazilian offshore basin	2009	10.1016/j.orggeochem.2009.02.006	Article	English	44	de Vasconcellos, SP; Crespim, E; da Cruz, GF; Senatore, DB; Simioni, KCM; Neto, EVD; Marsaioli, AJ; de Oliveira, VM
48	Evaluation of bacterial diversity recovered from petroleum samples using different physical matrices	2016	10.1016/j.bjm.2016.04.004	Article	English	4	Dellagnezze, BM; de Vasconcellos, SP; de Melo, IS; Neto, EVD; de Oliveira, VM
49	Functional microorganisms involved in the sulfur and nitrogen metabolism in production water from a high-temperature offshore petroleum reservoir	2020	10.1016/j.ibiod.2020.105057	Article	English	4	Zhou, L; Wang, DW; Zhang, SL; Tang, EG; Lu, YW; Jing, YF; Lin, DD; Liu, ZL; Liu, JF; Yang, SZ; Zhang, J; Gu, JD; Mu, BZ
50	Potential of wheat bran to promote indigenous microbial enhanced oil recovery	2017	10.1007/s10295-017-1909-0	Article	English	3	Zhan, YL; Wang, QH; Chen, CM; Kim, JB; Zhang, HD; Yoza, BA; Li, QX
51	Crude oil degradation by bacterial consortia under four different redox and temperature conditions	2015	10.1007/s00253-014-6042-7	Article	English	10	Xiong, SZ; Li, X; Chen, JF; Zhao, LP; Zhang, H; Zhang, XJ
52	Halomonas plays a central role in the syntrophic community of an alkaline oil reservoir with alkali-surfactant-polymer (ASP) flooding	2020	10.1016/j.scitotenv.2020.141333	Article	English	6	Chen, Y; Pan, J; Yun, Y; Zhi, B; Li, GQ; Li, M; Ma, T
53	Molecular characterization of the alkB gene in the thermophilic Geobacillus sp strain MH-1	2009	10.1016/j.resmic.2009.08.010	Article	English	18	Liu, YC; Zhou, TT; Zhang, J; Xu, L; Zhang, ZH; Shen, QR; Shen, BA
54	Growth Inhibition of Sulfate-Reducing Bacteria in Produced Water from the Petroleum Industry Using Essential Oils	2017	10.3390/molecules22040648	Article	English	7	de Souza, PM; Goulart, FRD; Marques, JM; Bizzo, HR; Blank, AF; Groposo, C; de Sousa, MP; Volaro, V; Alviano, CS; Moreno, DSA; Seldin, L
55	Characterizing microbial diversity in production water from an Alaskan mesothermic petroleum reservoir with two independent molecular methods	2009	10.1111/j.1462-2920.2008.01751.x	Article	English	135	Pham, VD; Hnatow, LL; Zhang, SP; Fallon, RD; Jackson, SC; Tomb, JF; DeLong, EF; Keeler, SJ
56	Isolation and characterization of crude-oil-degrading bacteria from oil-water mixture in Dagang oilfield, China	2014	10.1016/j.ibiod.2013.11.005	Article	English	36	Liu, HJ; Yao, J; Yuan, ZM; Shang, YF; Chen, HL; Wang, F; Masakorala, K; Yu, C; Cai, MM; Blake, RE; Choi, MMF
57	Biodegradation of oil in uplifted basins prevented by deep-burial sterilization (vol 411, pg 1034, 2001)	2001	10.1038/35102091	Correction	English	0	Wilhelms, A; Larter, SR; Head, I; Farrimond, P; di-Primo, R; Zwach, C
58	Microbial Abundance and Community Composition Influence Production Performance in a Low-Temperature Petroleum Reservoir	2014	10.1021/es500239w	Article	English	43	Li, GQ; Gao, PK; Wu, YQ; Tian, HM; Dai, XC; Wang, YS; Cui, QF; Zhang, HZ; Pan, XX; Dong, HP; Ma, T
59	Characterization of the Aerobic Hydrocarbon-Oxidizing Enrichments from a High-Temperature Petroleum Reservoir by Comparative Analysis of DNA- and RNA-Derived Clone Libraries	2011	10.1134/s0026261711010140	Article	English	18	Shestakova, NM; Korshunova, AV; Mikhailova, EM; Sokolova, DS; Tourova, TP; Belyaev, SS; Poltaraus, AB; Nazina, TN
60	Microbial Degradation Rates of Natural Bitumen	2021	10.1021/acs.est.1c00596	Article	English	2	Pannekens, M; Voskuhl, L; Mohammadian, S; Koster, D; Meier, A; Kohne, JM; Kulbatzki, M; Akbari, A; Haque, S; Meckenstock, RU
61	Biotechnology in the petroleum industry: An overview	2014	10.1016/j.ibiod.2013.09.011	Review	English	113	Bachmann, RT; Johnson, AC; Edyvean, RGJ
62	Effect of Reservoir Salinity between Bioacid and Carbonate Rock Based on Biometabolic Analysis	2019	10.1021/acs.energyfuels.9b01522	Article	English	1	Zheng, XC; Lin, XS; Yang, YR; Wen, YP; Shi, YM; Xie, XF; Hou, AX; Lai, NJ
63	Chemical dispersant potentiates crude oil impacts on growth, reproduction, and gene expression in Caenorhabditis elegans	2013	10.1007/s00204-012-0936-x	Article	English	23	Zhang, YQ; Chen, DL; Ennis, AC; Polli, JR; Xiao, P; Zhang, BH; Stellwag, EJ; Overton, A; Pan, XP
64	BACTERIAL DIVERSITY CHARACTERIZATION IN PETROLEUM SAMPLES FROM BRAZILIAN RESERVOIRS	2008	10.1590/s1517-83822008000300007	Article	English	19	de Oliveira, VM; Sette, LD; Simioni, KCM; Neto, EVD
65	Simultaneous detection of transcribed functional assA gene and the corresponding metabolites of linear alkanes (C-4, C-5, and C-7) in production water of a low-temperature oil reservoir	2020	10.1016/j.scitotenv.2020.141290	Article	English	3	Liu, JF; Lu, YW; Zhou, L; Li, W; Hou, ZW; Yang, SZ; Wu, XL; Gu, JD; Mu, BZ
66	Draft Genome Sequence of Halomonas titanicae Strain TAT1, a Hydrocarbon-Oxidizing Halophilic Bacterium Isolated from a Petroleum Reservoir in Russia	2020	10.1128/mra.01255-20	Article	English	3	Grouzdev, DS; Sokolova, DS; Poltaraus, AB; Nazina, TN
67	Bacterial and archaeal diversity in oil fields and reservoirs and their potential role in hydrocarbon recovery and bioprospecting	2021	10.1007/s11356-020-11705-z	Review	English	6	Singh, NK; Choudhary, S
68	New tools to determine bubble point pressure of crude oils: Experimental and modeling study	2014	10.1016/j.petrol.2014.08.018	Article	English	16	Ahmadi, MA; Zendehboudi, S; James, LA; Elkamel, A; Dusseault, M; Chatzis, I; Lohi, A
69	Exploiting Microbes in the Petroleum Field: Analyzing the Credibility of Microbial Enhanced Oil Recovery (MEOR)	2021	10.3390/en14154684	Review	English	12	Quraishi, M; Bhatia, SK; Pandit, S; Gupta, PK; Rangarajan, V; Lahiri, D; Varjani, S; Mehariya, S; Yang, YH
70	A Microbial-enhanced Oil Recovery Trial in Huabei Oilfield in China	2014	10.1080/10916466.2010.497788	Article	English	6	Huang, L; Yu, L; Luo, Z; Song, S; Bo, H; Zheng, C
71	Evaluation of a microbial consortium for crude oil spill bioremediation and its potential uses in enhanced oil recovery	2019	10.1016/j.bcab.2019.101034	Article	English	10	Bhattacharya, M; Guchhait, S; Biswas, D; Singh, R
72	Recent advances in petroleum microbiology	2003	10.1128/mmbr.67.4.503-549.2003	Review	English	836	Van Hamme, JD; Singh, A; Ward, OP
73	Responses of Microbial Community Composition to Temperature Gradient and Carbon Steel Corrosion in Production Water of Petroleum Reservoir	2017	10.3389/fmicb.2017.02379	Article	English	27	Li, XX; Yang, T; Mbadinga, SM; Liu, JF; Yang, SZ; Gu, JD; Mu, BZ
74	Dominance of Pseudomonas in bacterial community and inhibition of fumarate addition pathway by injection of nutrients in oil reservoir revealed by functional gene and their transcript analyses	2020	10.1016/j.ibiod.2020.105039	Article	English	5	Liu, JF; Lu, YW; Liu, XB; Li, BG; Sun, YF; Zhou, L; Liu, YF; Yang, SZ; Gu, JD; Mu, BZ
75	Diversity analysis of microbial communities and biodegradation performance of two halotolerant and thermotolerant Bacillus licheniformis strains in oilfield-produced wastewater	2019	10.1016/j.ibiod.2018.11.004	Article	English	3	Huang, X; Wang, J; Ma, CY; Ma, LY; Qiao, C
76	Molecular analysis of the bacterial community in a continental high-temperature and water-flooded petroleum reservoir	2006	10.1111/j.1574-6968.2006.00149.x	Article	English	61	Li, H; Yang, SZ; Mu, BZ; Rong, ZF; Zhang, J
77	Microbial Processes in Oil Fields: Culprits, Problems, and Opportunities	2009	10.1016/s0065-2164(08)00806-x	Review; Book Chapter	English	257	Youssef, N; Elshahed, MS; McInerney, MJ
78	Vertical response of microbial community and degrading genes to petroleum hydrocarbon contamination in saline alkaline soil	2019	10.1016/j.jes.2019.02.001	Article	English	29	Liu, QL; Tang, J; Liu, XM; Song, BR; Zhen, MN; Ashbolt, NJ
79	Responses of microbial community from tropical pristine coastal soil to crude oil contamination	2016	10.7717/peerj.1733	Article	English	20	Morais, D; Pylro, V; Clark, IM; Hirsch, PR; Totola, MR
80	Microbial Diversity in High-Temperature Heavy Oil Reservoirs	2020	10.1080/01490451.2019.1662523	Article	English	4	Tian, Y; Wan, YY; Mu, HM; Dong, HL; Briggs, BR; Zhang, ZH
81	Functional genes (dsr) approach reveals similar sulphidogenic prokaryotes diversity but different structure in saline waters from corroding high temperature petroleum reservoirs	2014	10.1007/s00253-013-5152-y	Article	English	36	Guan, J; Zhang, BL; Mbadinga, SM; Liu, JF; Gu, JD; Mu, BZ
82	Diversity and Similarity of Microbial Communities in Petroleum Crude Oils Produced in Asia	2008	10.1271/bbb.80227	Article	English	41	Yamane, K; Maki, H; Nakayama, T; Nakajima, T; Nomura, N; Uchiyama, H; Kitaoka, M
83	Microbiota and their affiliation with physiochemical characteristics of different subsurface petroleum reservoirs	2017	10.1016/j.ibiod.2017.02.005	Review	English	46	Li, XX; Mbadinga, SM; Liu, JF; Zhou, L; Yang, SZ; Gu, JD; Mu, BZ
84	Genome-Resolved Meta-Analysis of the Microbiome in Oil Reservoirs Worldwide	2021	10.3390/microorganisms9091812	Article	English	2	Hidalgo, KJ; Sierra-Garcia, IN; Zafra, G; de Oliveira, VM
85	Analysis of Microbial Community Succession in Daqing Oil Field	2010	10.4028/www.scientific.net/amr.113-116.830	Proceedings Paper	English	0	Huang, YH; Ren, GL; Wei, L; Wu, XL; Yuan, HM; Song, KP
86	Toxicity Screening of Produced Water Extracts in a Zebrafish Embryo Assay	2014	10.1080/15287394.2014.887424	Article; Proceedings Paper	English	19	Carlsson, G; Norrgren, L; Hylland, K; Tollefsen, KE
87	Microbial reduction of CO2 from injected (NaHCO3)-C-13 with degradation of n-hexadecane in the enrichment culture derived from a petroleum reservoir	2018	10.1016/j.ibiod.2017.12.002	Article	English	10	Ma, L; Liang, B; Wang, LY; Zhou, L; Mbadinga, SM; Gu, JD; Mu, BZ
88	Microbial communities inhabiting oil-contaminated soils from two major oilfields in Northern China: Implications for active petroleum-degrading capacity	2015	10.1007/s12275-015-5023-6	Article	English	28	Sun, WM; Dong, YR; Gao, P; Fu, MY; Ta, KW; Li, JW
89	Biotechnology in petroleum recovery: The microbial EOR	2008	10.1016/j.pecs.2008.05.001	Review	English	298	Sen, R
90	Selective inhibition of methanogenesis by sulfate in enrichment culture with production water from low-temperature oil reservoir	2016	10.1016/j.ibiod.2015.11.002	Article	English	17	Lv, L; Zhou, L; Wang, LY; Liu, JF; Gu, JD; Mu, BZ; Yang, SZ
91	Combining stable carbon isotope analysis and petroleum-fingerprinting to evaluate petroleum contamination in the Yanchang oilfield located on loess plateau in China	2018	10.1007/s11356-017-0500-6	Article	English	27	Wang, YP; Liang, JD; Wang, JX; Gao, S
92	Diversity and distribution of sulfate-reducing bacteria in four petroleum reservoirs detected by using 16S rRNA and dsrAB genes	2013	10.1016/j.ibiod.2012.06.021	Article	English	64	Guan, J; Xia, LP; Wang, LY; Liu, JF; Gu, JD; Mu, BZ
93	Long-chain n-alkane biodegradation coupling to methane production in an enriched culture from production water of a high-temperature oil reservoir	2020	10.1186/s13568-020-00998-5	Article	English	7	Chen, J; Liu, YF; Zhou, L; Irfan, M; Hou, ZW; Li, W; Mbadinga, SM; Liu, JF; Yang, SZ; Wu, XL; Gu, JD; Mu, BZ
94	Stress response of the black coral Leiopathes glaberrima when exposed to sub-lethal amounts of crude oil and dispersant	2017	10.1525/elementa.261	Article	English	7	Ruiz-Ramos, DV; Fisher, CR; Baums, IB
95	The quantitative significance of Syntrophaceae and syntrophic partnerships in methanogenic degradation of crude oil alkanes	2011	10.1111/j.1462-2920.2011.02570.x	Article	English	179	Gray, ND; Sherry, A; Grant, RJ; Rowan, AK; Hubert, CRJ; Callbeck, CM; Aitken, CM; Jones, DM; Adams, JJ; Larter, SR; Head, IM
96	Petroleum contamination evaluation and bacterial community distribution in a historic oilfield located in loess plateau in China	2019	10.1016/j.apsoil.2018.12.012	Article	English	46	Gao, S; Liang, JD; Teng, TT; Zhang, M
97	The metabolism of pyrene by a novel Altererythrobacter sp. with in-situ co-substrates: A mechanistic analysis based on pathway, genomics, and enzyme activity	2022	10.1016/j.chemosphere.2022.135784	Article	English	0	Fan, KQ; Feng, QM; Li, K; Lin, JZ; Wang, WD; Cao, YB; Gai, HJ; Song, HB; Huang, TT; Zhu, QH; Xiao, M
98	Characterization of microbial response to petroleum hydrocarbon contamination in a lacustrine ecosystem	2021	10.1007/s11356-021-13885-8	Article	English	5	D'Ugo, E; Bruno, M; Mukherjee, A; Chattopadhyay, D; Giuseppetti, R; De Pace, R; Magurano, F
99	The abundance and distribution of diamondoids in biodegraded oils from the San Joaquin Valley: Implications for biodegradation of diamondoids in petroleum reservoirs	2007	10.1016/j.orggeochem.2007.07.009	Article	English	50	Wei, ZB; Moldowan, JM; Peters, KE; Wang, Y; Xiang, W
100	Rapid method for the determination of solution gas-oil ratios of petroleum reservoir fluids	2015	10.1016/j.jngse.2015.03.022	Article	English	14	Baniasadi, H; Kamari, A; Heidararabi, S; Mohammadi, AH; Hemmati-Sarapardeh, A
101	Analysis of microbial communities in the oil reservoir subjected to CO2-flooding by using functional genes as molecular biomarkers for microbial CO2 sequestration	2015	10.3389/fmicb.2015.00236	Article	English	34	Liu, JF; Sun, XB; Yang, GC; Mbadinga, SM; Gu, JD; Mu, BZ
102	Microbial methane formation in deep aquifers of a coal-bearing sedimentary basin, Germany	2015	10.3389/fmicb.2015.00200	Article	English	26	Grundger, F; Jimenez, N; Thielemann, T; Straaten, N; Luders, W; Richnow, HH; Kruger, M
103	Genome-Resolved Metagenomic Analysis Reveals Roles for Candidate Phyla and Other Microbial Community Members in Biogeochemical Transformations in Oil Reservoirs	2016	10.1128/mbio.01669-15	Article	English	90	Hu, P; Tom, L; Singh, A; Thomas, BC; Baker, BJ; Piceno, YM; Andersen, GL; Banfield, JF
104	Permanent draft genome sequence of Geobacillus thermocatenulatus strain GS-1	2014	10.1016/j.margen.2014.09.005	Article	English	6	Zheng, BW; Zhang, F; Chai, LJ; Yu, GM; Shu, FC; Wang, ZL; Su, SB; Xiang, TS; Zhang, ZZ; Hou, DJ; She, YH
105	Methanogenic biodegradation of C-9 to C(12)n-alkanes initiated by Smithella via fumarate addition mechanism	2020	10.1186/s13568-020-0956-5	Article	English	15	Ji, JH; Zhou, L; Mbadinga, SM; Irfan, M; Liu, YF; Pan, P; Qi, ZZ; Chen, J; Liu, JF; Yang, SZ; Gu, JD; Mu, BZ
106	Description of the Methods Used by Some of the Contributing Authors in This Book	2011	10.1007/978-90-481-9252-6	Proceedings Paper	English	0
107	Complementary Microorganisms in Highly Corrosive Biofilms from an Offshore Oil Production Facility	2016	10.1128/aem.03842-15	Article	English	89	Vigneron, A; Alsop, EB; Chambers, B; Lomans, BP; Head, IM; Tsesmetzis, N
108	Rapid method to estimate the minimum miscibility pressure (MMP) in live reservoir oil systems during CO2 flooding	2015	10.1016/j.fuel.2015.02.087	Article	English	63	Kamari, A; Arabloo, M; Shokrollahi, A; Gharagheizi, F; Mohammadi, AH
109	Phylogenetic diversity and activity of anaerobic microorganisms of high-temperature horizons of the Dagang oil field (P.R. China)	2006	10.1134/s0026261706010115	Article	English	79	Nazina, TN; Shestakova, NM; Grigor'yan, AA; Mikhailova, EM; Tourova, TP; Poltaraus, AB; Feng, CX; Ni, FT; Belyaev, SS
110	Molecular Detection of Anaerobic Ammonium-Oxidizing (Anammox) Bacteria in High-Temperature Petroleum Reservoirs	2010	10.1007/s00248-010-9733-3	Article	English	107	Li, H; Chen, S; Mu, BZ; Gu, JD
111	Degradative capacities and 16S rRNA-targeted whole-cell hybridization of sulfate-reducing bacteria in an anaerobic enrichment culture utilizing alkylbenzenes from crude oil	1996	10.1128/aem.62.10.3605-3613.1996	Article	English	160	Rabus, R; Fukui, M; Wilkes, H; Widdel, F
112	Food Crop Irrigation with Oilfield-Produced Water Suppresses Plant Immune Response	2019	10.1021/acs.estlett.9b00539	Article	English	16	Miller, H; Trivedi, P; Qiu, YH; Sedlacko, EM; Higgins, CP; Borch, T
113	Disentangling oil weathering at a marine seep using GCxGC: Broad metabolic specificity accompanies subsurface petroleum biodegradation	2008	10.1021/es8013908	Article	English	61	Wardlaw, GD; Arey, JS; Reddy, CM; Nelson, RK; Ventura, GT; Valentine, DL
114	Formation mechanisms of heavy oils in the Liaohe Western Depression, Bohai Gulf Basin	2008	10.1007/s11430-008-6020-y	Article	English	8	Li, SM; Pang, XQ; Liu, KY; Gao, XZ; Li, XG; Chen, ZY; Liu, BH
115	Effect of sulfate-reducing bacteria from salt scale of water flooding pipeline on corrosion behavior of X80 steel	2022	10.1016/j.engfailanal.2022.106788	Article	English	0	Zhao, RL; Wang, B; Li, DB; Chen, YM; Zhang, QS
116	An integrated physicochemical and microbiological method for enhanced recovery of viscous oils from low temperature reservoirs of Mongolia	2013	10.1134/s0965544113020023	Article	English	0	Altunina, LK; Svarovskaya, LI; Gerelmaa, T
117	Potential of viscosity reducing thermophillic anaerobic bacterial consortium TERIB#90 in upgrading heavy oil	2015	10.1016/j.fuel.2014.12.003	Article	English	14	Lavania, M; Cheema, S; Lal, B
118	Profiling of Sulfate-Reducing Bacteria in an Offshore Oil Reservoir Using Phospholipid Fatty Acid (PLFA) Biomarkers	2017	10.1007/s11270-017-3595-y	Article	English	3	Fan, FQ; Zhang, BY; Morrill, PL; Husain, T
119	Toward evaluation and screening of the enhanced oil recovery scenarios for low permeability reservoirs using statistical and machine learning techniques	2022	10.1016/j.fuel.2022.124795	Article	English	2	Mahdaviara, M; Sharifi, M; Ahmadi, M
120	Anaerobic degradation and carbon isotopic fractionation of alkylbenzenes in crude oil by sulphate-reducing bacteria	2000	10.1016/s0146-6380(99)00147-3	Article	English	85	Wilkes, H; Boreham, C; Harms, G; Zengler, K; Rabus, R
121	Modeling of interfacial tension in binary mixtures of CH4, CO2, and N-2(-) alkanes using gene expression programming and equation of state	2020	10.1016/j.molliq.2020.114454	Article	English	15	Mirzaie, M; Tatar, A
122	Genomics and simulated laboratory studies reveal Thermococcus sp. 101C5 as a novel hyperthermophilic archaeon possessing a specialized metabolic arsenal for enhanced oil recovery	2022	10.1007/s10482-021-01667-8	Article	English	0	Kapse, NG; Paliwal, V; Dagar, SS; Rana, DP; Dhakephalkar, PK
123	New empirical correlations for determination of Minimum Miscibility Pressure (MMP) during N-2-contaminated lean gas flooding	2018	10.1016/j.jtice.2018.05.048	Article	English	20	Rostami, A; Kamari, A; Panacharoensawad, E; Hashemi, A
124	Experimental Study on Microbial Induced Calcium Carbonate Precipitation to Enhance Reservoir Recovery	2022	10.30498/ijb.2021.279942.3024	Article	English	1	Zhong, M; Liu, BL; Zhang, LF; Wang, JT; Chen, J; Li, JY; Liu, YR; Ming, LT
125	Draft Genome Sequence of a Fermenting Bacterium, Soehngenia sp. Strain 1933P, Isolated from a Petroleum Reservoir in Azerbaijan	2019	10.1128/mra.00689-19	Article	English	3	Grouzdev, DS; Bidzhieva, SK; Sokolova, DS; Tourova, TP; Poltaraus, AB; Nazina, TN
126	Modeling of CO2 solubility in crude oil during carbon dioxide enhanced oil recovery using gene expression programming	2017	10.1016/j.fuel.2017.08.110	Article	English	46	Rostami, A; Arabloo, M; Kamari, A; Mohammadi, AH
127	Evaluation of the Microbial Community and Geochemistry in Produced Waters Collected from CO2 EOR in the Niagaran Pinnacle Reef	2022	10.1021/acsearthspacechem.2c00247	Article	English	0	Stemple, B; Gulliver, D; Tinker, K; Sarkar, P; Miller, J; Bibby, K
128	Prokaryotic Community Characterization in a Mesothermic and Water-Flooded Oil Reservoir in Colombia	2016	10.1080/01490451.2015.1039674	Article	English	6	Hernandez-Torres, J; Villamizar, GAC; Salgar-Chaparro, SJ; Silva-Plata, BA; Daza, ODS; Martinez-Perez, F; Umana, RM; Levy, M; Fuentes, JL
129	Draft Genome Sequence of Geotoga petraea Strain HO-Geo1, Isolated from a Petroleum Reservoir in Russia	2019	10.1128/mra.00706-19	Article	English	2	Grouzdev, DS; Semenova, EM; Sokolova, DS; Tourova, TP; Poltaraus, AB; Nazina, TN
130	Phylogenetic analysis of the microbial community in hypersaline petroleum produced water from the Campos Basin	2014	10.1007/s11356-014-3155-6	Article	English	10	Piubeli, F; Grossman, MJ; Fantinatti-Garboggini, F; Durrant, LR
131	Candida albicans Dispersed Cells Are Developmentally Distinct from Biofilm and Planktonic Cells	2018	10.1128/mbio.01338-18	Article	English	43	Uppuluri, P; Zaldivar, MA; Anderson, MZ; Dunn, MJ; Berman, J; Ribot, JLL; Kohler, JR
132	Modeling asphaltene precipitation during natural depletion of reservoirs and evaluating screening criteria for stability of crude oils	2019	10.1016/j.petrol.2019.05.078	Article	English	10	Hemmati-Sarapardeh, A; Ahmadi, M; Ameli, F; Dabir, B; Mohammadi, AH; Husein, MM
133	Evidence of sporulation capability of the ubiquitous oil reservoir microbe Halanaerobium congolense	2021	10.1080/01490451.2020.1842944	Article	English	2	Jones, AA; Pilloni, G; Claypool, JT; Paiva, AR; Summers, ZM
134	An evaluation of different detection methods for anaerobic ammonium-oxidizing (anammox) bacteria inhabiting the oil reservoir systems	2023	10.1016/j.ibiod.2022.105536	Article	English	0	Gao, PK; Gao, Y; Wang, HB; Ma, T; Gu, JD
135	The effect of long-term nitrate treatment on SRB activity, corrosion rate and bacterial community composition in offshore water injection systems	2008	10.1007/s10295-008-0406-x	Article	English	66	Bodtker, G; Thorstenson, T; Lillebo, BLP; Thorbjornsen, BE; Ulvoen, RH; Sunde, E; Torsvik, T
136	Novel Bacillus cereus strain from electrokinetically remediated saline soil towards the remediation of crude oil	2018	10.1007/s11356-018-2495-z	Article	English	3	Gao, YC; Guo, SH; Wang, JN; Zhang, W; Chen, GH; Wang, H; Du, JH; Liu, YJ; Naidu, R
137	Influence of surface mineralogy on the activity of Halanaerobium sp. during microbial enhanced oil recovery (MEOR)	2021	10.1016/j.fuel.2020.119973	Article	English	8	Kogler, F; Dopffel, N; Mahler, E; Hartmann, FSF; Schulze-Makuch, D; Visser, F; Frommherz, B; Herold, A; Alkan, H
138	Genetic and Comparative Genome Analysis of Exiguobacterium aurantiacum SW-20, a Petroleum-Degrading Bacteria with Salt Tolerance and Heavy Metal-Tolerance Isolated from Produced Water of Changqing Oilfield, China	2022	10.3390/microorganisms10010066	Article	English	2	Su, ZY; Wang, SJ; Yang, SC; Yin, YJ; Cao, YK; Li, GQ; Ma, T
139	Methanogenic Hydrocarbon Degradation: Evidence from Field and Laboratory Studies	2016	10.1159/000441679	Review	English	35	Jimenez, N; Richnow, HH; Vogt, C; Treude, T; Kruger, M
140	Increased soil methane emissions and methanogenesis in oil contaminated areas	2018	10.1002/ldr.2886	Article	English	10	Yang, JJ; Li, GH; Qian, Y; Zhang, F
141	Propionate metabolism and diversity of relevant functional genes by in silico analysis and detection in subsurface petroleum reservoirs	2017	10.1007/s11274-017-2350-2	Article	English	2	Yang, T; Mbadinga, SM; Zhou, L; Yang, SZ; Liu, JF; Gu, JD; Mu, BZ
142	Identification and Phylogenetic Analyses of Anaerobic Sulfidogenic Bacteria in Two Algerian Oilfield Water Injection Samples	2021	10.1080/01490451.2021.1939814	Article	English	1	Lenchi, N; Kebbouche-Gana, S; Servais, P; Gana, ML; Lliros, M
143	Culture-dependent and culture-independent methods reveal microbe-clay mineral interactions by dissimilatory iron-reducing bacteria in an integral oilfield	2022	10.1016/j.scitotenv.2022.156577	Article	English	1	Dong, H; Zhang, F; Xu, T; Liu, YL; Du, Y; Wang, C; Liu, TS; Gao, J; He, YL; Wang, XT; Sun, SS; She, YH
144	Deepwater Horizon crude oil exposure alters cholesterol biosynthesis with implications for developmental cardiotoxicity in larval mahi-mahi (Coryphaena hippurus)	2019	10.1016/j.cbpc.2019.03.001	Article	English	18	McGruer, V; Pasparakis, C; Grosell, M; Stieglitz, JD; Benetti, DD; Greer, JB; Schlenk, D
145	Quorum sensing autoinducers enhance biofilm formation and power production in a hypersaline microbial fuel cell	2016	10.1016/j.bej.2016.01.023	Article	English	46	Monzon, O; Yang, Y; Li, QL; Alvarez, PJJ
146	Microbial diversity in production waters of a low-temperature biodegraded oil reservoir	2005	10.1016/j.femsec.2005.05.007	Article	English	222	Grabowski, A; Nercessian, O; Fayolle, F; Blanchet, D; Jeanthon, C
147	Toxicological and chemical studies of wastewater from hydraulic fracture and conventional shale gas wells	2018	10.1002/etc.4146	Article	English	6	Crosby, LM; Tatu, CA; Varonka, M; Charles, KM; Orem, WH
148	Production Processes Affected Prokaryotic amoA Gene Abundance and Distribution in High-Temperature Petroleum Reservoirs	2011	10.1080/01490451.2010.514026	Article	English	23	Li, H; Mu, BZ; Jiang, Y; Gu, JD
149	Fungal Community, Metabolic Diversity, and Glomalin-Related Soil Proteins (GRSP) Content in Soil Contaminated With Crude Oil After Long-Term Natural Bioremediation	2020	10.3389/fmicb.2020.572314	Article	English	13	Galazka, A; Grzadziel, J; Galazka, R; Gawryjolek, K; Ukalska-Jaruga, A; Smreczak, B
150	Metagenomic Investigation of a Low Diversity, High Salinity Offshore Oil Reservoir	2021	10.3390/microorganisms9112266	Article	English	4	Scheffer, G; Hubert, CRJ; Enning, DR; Lahme, S; Mand, J; de Rezende, JR
151	Damage to offshore production facilities by corrosive microbial biofilms	2018	10.1007/s00253-018-8808-9	Review	English	44	Vigneron, A; Head, IM; Tsesmetzis, N
152	Bacterial 3 ' UTRs: A Useful Resource in Post-transcriptional Regulation	2021	10.3389/fmolb.2020.617633	Review	English	6	Menendez-Gil, P; Toledo-Arana, A
153	Methanogenic Degradation of Long n-Alkanes Requires Fumarate-Dependent Activation	2019	10.1128/aem.00985-19	Article	English	16	Ji, JH; Liu, YF; Zhou, L; Mbadinga, SM; Pan, P; Chen, J; Liu, JF; Yang, SZ; Sand, W; Gu, JD; Mu, BZ
154	Subinhibitory Concentrations of Allicin Decrease Uropathogenic Escherichia coli (UPEC) Biofilm Formation, Adhesion Ability, and Swimming Motility	2016	10.3390/ijms17070979	Article	English	22	Yang, XL; Sha, KH; Xu, GY; Tian, HW; Wang, XY; Chen, SZ; Wang, Y; Li, JY; Chen, JL; Huang, N
155	Acidophilic microbial communities associated with a natural, biodegraded hydrocarbon seepage	2006	10.1111/j.1365-2672.2006.02926.x	Article	English	27	Roling, WFM; Ortega-Lucach, S; Larter, SR; Head, IM
156	Potential for Biomass Production and Remediation by Cultivation of the Marine Model Diatom Phaeodactylum tricornutum in Oil Field Produced Wastewater Media	2021	10.3390/w13192700	Article	English	2	Gillard, JTF; Hernandez, AL; Contreras, JA; Francis, IM; Cabrales, L
157	Diversity and abundance of ammonia-oxidizing bacteria (AOB) revealed by PCR amplification of amoA gene in a polyacrylamide transportation system of an oilfield	2016	10.1016/j.ibiod.2016.08.001	Article	English	3	Li, CY; Hu, H; Feng, JY; Mbadinga, SM; Liu, JF; Yang, SZ; Gu, JD; Mu, BZ
158	Effects of petroleum contamination on soil microbial numbers, metabolic activity and urease activity	2012	10.1016/j.chemosphere.2012.01.034	Article	English	101	Guo, H; Yao, J; Cai, MM; Qian, YG; Guo, Y; Richnow, HH; Blake, RE; Doni, S; Ceccanti, B
159	Succession in the petroleum reservoir microbiome through an oil field production lifecycle	2017	10.1038/ismej.2017.78	Article	English	86	Vigneron, A; Alsop, EB; Lomans, BP; Kyrpides, NC; Head, IM; Tsesmetzis, N
160	Microbial diversity of an oil-water processing site and its associated oil field: the possible role of microorganisms as information carriers from oil-associated environments	2010	10.1111/j.1574-6941.2009.00813.x	Article	English	45	van der Kraan, GM; Bruining, J; Lomans, BP; van Loosdrecht, MCM; Muyzer, G
161	Bacterial community structure of aged oil sludge contaminated soil revealed by illumina high-throughput sequencing in East China	2021	10.1007/s11274-021-03059-6	Article	English	1	Wang, HH; Kuang, SP; Lang, QL; Wang, L
162	Microbial communities responsible for fixation of CO2 revealed by using mcrA, cbbM, cbbL, fthfs, fefe-hydrogenase genes as molecular biomarkers in petroleum reservoirs of different temperatures	2016	10.1016/j.ibiod.2016.06.019	Article	English	6	Liu, JF; Mbadinga, SM; Sun, XB; Yang, GC; Yang, SZ; Gu, JD; Mu, BZ
163	Effects of Air Injection on the Metabolic Activity of Emulsifier-Producing Bacteria from Oil Reservoirs	2020	10.1155/2020/8987258	Article	English	0	Gu, Y; Wu, ZZ; Wang, G; Zhi, B; Yu, JL; Fan, HQ; Guo, SZ; Ma, T; Li, GQ
164	Identification and phylogenetic analysis of thermophilic sulfate-reducing bacteria in oil field samples by 16S rDNA gene cloning and sequencing	1998	10.1006/anae.1998.0156	Article	English	21	Leu, JY; McGovern-Traa, CP; Porter, AJR; Harris, WJ; Hamilton, WA
165	New method for predicting n-tetradecane/bitumen mixture density: correlation development	2018	10.2516/ogst/2018037	Article	English	7	Rostami, A; Shokrollahi, A; Ghazanfari, MH
166	Bisulfite reductase and nitrogenase genes retrieved from biocorrosive bacteria in saline produced waters of offshore oil recovery facilities	2013	10.1016/j.ibiod.2012.07.005	Article; Proceedings Paper	English	11	Zapata-Penasco, I; Salazar-Coria, L; Saucedo-Garcia, M; Villa-Tanaka, L; Hernandez-Rodriguez, C
167	Isolation and complete genome sequence of Halorientalis hydrocarbonoclasticus sp nov., a hydrocarbon-degrading haloarchaeon	2017	10.1007/s00792-017-0968-5	Article	English	14	Zhao, DH; Kumar, S; Zhou, J; Wang, R; Li, M; Xiang, H
168	New Hydrocarbon Degradation Pathways in the Microbial Metagenome from Brazilian Petroleum Reservoirs	2014	10.1371/journal.pone.0090087	Article	English	60	Sierra-Garcia, IN; Alvarez, JC; de Vasconcellos, SP; de Souza, AP; dos Santos, EV; de Oliveira, VM
169	Regulatory 3' Untranslated Regions of Bacterial mRNAs	2017	10.3389/fmicb.2017.01276	Review	English	21	Ren, GX; Guo, XP; Sun, YC
170	A transposon-derived small RNA regulates gene expression in Salmonella Typhimurium	2017	10.1093/nar/gkx094	Article	English	19	Ellis, MJ; Trussler, RS; Charles, O; Haniford, DB
171	Activation of CO2-reducing methanogens in oil reservoir after addition of nutrient	2016	10.1016/j.jbiosc.2016.06.011	Article	English	11	Yang, GC; Zhou, L; Mbadinga, SM; You, J; Yang, HZ; Liu, JF; Yang, SZ; Gu, JD; Mu, BZ
172	Acetoclastic methanogenesis is likely the dominant biochemical pathway of palmitate degradation in the presence of sulfate	2015	10.1007/s00253-015-6669-z	Article	English	11	Lv, L; Mbadinga, S; Wang, LY; Liu, JF; Gu, JD; Mu, BZ; Yang, SZ
173	Corrosion of carbon steel in the presence of oilfield deposit and thiosulphate-reducing bacteria in CO2 environment	2017	10.1016/j.corsci.2017.09.011	Article	English	32	Machuca, LL; Lepkova, K; Petroski, A
174	Petroleum geochemistry of oil samples from shallow boreholes at Sakran site, western Iraq	2014	10.1007/s12517-012-0813-1	Article	English	3	Al-Rawi, FR; Al-Ameri, TK; Awadh, SM
175	Application of modified GMDH network for CO2-oil minimum miscibility pressure prediction	2020	10.1080/15567036.2019.1604908	Article	English	2	Huang, W; Du, YH; Ren, HM; Guo, J; Wang, RS; Wang, Z; Zhao, LY; Hao, ZY
176	Bacterial diversity in water injection systems of Brazilian offshore oil platforms	2010	10.1007/s00253-009-2281-4	Article	English	31	Korenblum, E; Valoni, E; Penna, M; Seldin, L
177	Oil contamination drives the transformation of soil microbial communities: Co-occurrence pattern, metabolic enzymes and culturable hydrocarbon-degrading bacteria	2021	10.1016/j.ecoenv.2021.112740	Article	English	12	Huang, LP; Ye, JY; Jiang, KM; Wang, YC; Li, YY
178	Collective behavior and virulence arsenal of the fish pathogen Piscirickettsia salmonis in the biofilm realm	2022	10.3389/fcimb.2022.1067514	Article	English	0	Levipan, HA; Irgang, R; Opazo, LF; Araya-Leon, H; Avendano-Herrera, R
179	Distribution of petroleum degrading genes and factor analysis of petroleum contaminated soil from the Dagang Oilfield, China	2015	10.1038/srep11068	Article	English	92	Liu, QL; Tang, JC; Bai, ZH; Hecker, M; Giesy, JP
180	The phylogenetic diversity of aerobic organotrophic bacteria from the Dagang high-temperature oil field	2005	10.1007/s11021-005-0073-0	Article	English	21	Nazina, TN; Sokolova, DS; Shestakova, NM; Grigoryan, AA; Mikhailova, EM; Babich, TL; Lysenko, AM; Tourova, TP; Poltaraus, AB; Feng, QX; Ni, FT; Belyaev, SS
181	Microbial diversity and abundance in the Xinjiang Luliang long-term water-flooding petroleum reservoir	2015	10.1002/mbo3.241	Article	English	64	Gao, PK; Tian, HM; Li, GQ; Sun, HW; Ma, T
182	Microbiology of petroleum reservoirs	2000	10.1023/a:1002434330514	Review	English	367	Magot, M; Ollivier, B; Patel, BKC
183	Draft genome sequence of Paenibacillus sp. strain A2	2016	10.1186/s40793-015-0125-7	Article	English	3	Zheng, BW; Zhang, F; Dong, H; Chai, LJ; Shu, FC; Yi, SJ; Wang, ZL; Cui, QF; Dong, HP; Zhang, ZZ; Hou, DJ; Yang, JS; She, YH
184	Detection of Sulfate-Reducing Bacteria as an Indicator for Successful Mitigation of Sulfide Production	2021	10.1128/aem.01748-21	Article	English	2	Dutta, A; Valle, F; Goldman, T; Keating, J; Burke, E; Williamson, N; Dirmeier, R; Bowman, JS
185	Microbiological aspects of a combined physicochemical process for enhanced oil recovery	2008	10.1134/s0965544108030110	Article	English	4	Altunina, LK; Svarovskaya, LI; Ovsyannikova, VS
186	High-throughput metagenomic analysis of petroleum-contaminated soil microbiome reveals the versatility in xenobiotic aromatics metabolism	2017	10.1016/j.jes.2016.08.022	Article	English	31	Bao, YJ; Xu, ZX; Li, Y; Yao, Z; Sun, JB; Song, H
187	Inhibition of microbial H2S production in an oil reservoir model column by nitrate injection	2002	10.1007/s00253-001-0881-8	Article	English	104	Myhr, S; Lillebo, BLP; Sunde, E; Beeder, J; Torsvik, T
188	Effects of Aged Oil Sludge on Soil Physicochemical Properties and Fungal Diversity Revealed by High-Throughput Sequencing Analysis	2018	10.1155/2018/9264259	Article	English	11	Wang, HH; Kuang, SP; Lang, QL; Yu, WJ
189	Cultivation-dependent and cultivation-independent characterization of hydrocarbon-degrading bacteria in Guaymas Basin sediments	2015	10.3389/fmicb.2015.00695	Article	English	18	Gutierrez, T; Biddle, JF; Teske, A; Aitken, MD
190	Functional gene expression of oil-degrading bacteria resistant to hexadecane toxicity	2013	10.1016/j.chemosphere.2013.07.035	Article	English	10	Yu, C; Yao, J; Cai, MM; Wang, F; Masakorala, K; Liu, HJ; Blake, RE; Doni, S; Ceccanti, B
191	Relationships between water and gas chemistry in mature coalbed methane reservoirs of the Black Warrior Basin	2014	10.1016/j.coal.2013.10.002	Article	English	58	Pashin, JC; McIntyre-Redden, MR; Mann, SD; Kopaska-Merkel, DC; Varonka, M; Orem, W
192	Key players in the methanogenic biodegradation of n-hexadecane identified by DNA-Stable isotope probing	2019	10.1016/j.ibiod.2019.05.026	Article	English	7	Liu, JF; Zhang, K; Liang, B; Zhou, ZC; Yang, SZ; Li, W; Hou, ZW; Wu, XL; Gu, JD; Mu, BZ
193	Methanogenic Paraffin Biodegradation: Alkylsuccinate Synthase Gene Quantification and Dicarboxylic Acid Production	2018	10.1128/aem.01773-17	Article	English	15	Oberding, LK; Gieg, LM
194	ESTIMATION OF SAITHE POLLACHIUS-VIRENS GROWTH-RATES AROUND THE BERYL OIL PLATFORMS IN THE NORTH-SEA - A COMPARISON OF METHODS	1992	10.3354/meps086031	Article	English	11	MATHERS, EM; HOULIHAN, DF; CUNNINGHAM, MJ
195	Changes in the Phylogenetic Structure of the Metabolically Active Prokaryotic Soil Complex Induced by Oil Pollution	2020	10.1134/s0026261720020083	Article	English	5	Manucharova, NA; Ksenofontova, NA; Karimov, TD; Vlasova, AP; Zenova, GM; Stepanov, AL
196	Metabolomics reveals primary response of wheat (Triticum aestivum) to irrigation with oilfield produced water	2022	10.1016/j.envres.2022.113547	Article	English	0	Sedlacko, EM; Heuberger, AL; Chaparro, JM; Cath, TY; Higgins, CP
197	Analysis of Bacterial and Archaeal Communities along a High-Molecular-Weight Polyacrylamide Transportation Pipeline System in an Oil Field	2015	10.3390/ijms16047445	Article	English	15	Li, CY; Li, JY; Mbadinga, SM; Liu, JF; Gu, JD; Mu, BZ
198	Synergy of Sodium Nitroprusside and Nitrate in Inhibiting the Activity of Sulfate Reducing Bacteria in Oil-Containing Bioreactors	2018	10.3389/fmicb.2018.00981	Article	English	7	Fida, TT; Voordouw, J; Ataeian, M; Kleiner, M; Okpala, G; Mand, J; Voordouw, G
199	State-of-the-art modeling permeability of the heterogeneous carbonate oil reservoirs using robust computational approaches	2020	10.1016/j.fuel.2020.117389	Article	English	19	Mahdaviara, M; Rostami, A; Shahbazi, K
200	Anaerobic hydrocarbon degradation in candidate phylum 'Atribacteria' (JS1) inferred from genomics	2019	10.1038/s41396-019-0448-2	Article	English	31	Liu, YF; Qi, ZZ; Shou, LB; Liu, JF; Yang, SZ; Gu, JD; Mu, BZ
201	Wolf in Sheep's Clothing: Clostridioides difficile Biofilm as a Reservoir for Recurrent Infections	2021	10.3390/microorganisms9091922	Review	English	5	Meza-Torres, J; Auria, E; Dupuy, B; Tremblay, YDN
202	The transcriptional programme of Salmonella enterica serovar Typhimurium reveals a key role for tryptophan metabolism in biofilms	2009	10.1186/1471-2164-10-599	Review	English	86	Hamilton, S; Bongaerts, RJM; Mulholland, F; Cochrane, B; Porter, J; Lucchini, S; Lappin-Scott, HM; Hinton, JCD
203	Candidatus Mcinerneyibacterium aminivorans gen. nov., sp. nov., the first representative of the candidate phylum Mcinerneyibacteriota phyl. nov. recovered from a high temperature, high salinity tertiary oil reservoir in north central Oklahoma, USA	2020	10.1016/j.syapm.2020.126057	Article	English	1	Yadav, A; Vilcaez, J; Farag, IF; Johnson, B; Mueller, K; Youssef, NH; Elshahed, MS
204	Isolation from oil reservoirs of novel thermophilic anaerobes phylogenetically related to Thermoanaerobacter subterraneus: reassignment of T-subterraneus, Thermoanaerobacter yonseiensis, Thermoanaerobacter tengcongensis and Carboxydibrachium pacificum to Caldanaerobacter subterraneus gen. nov., sp nov., comb. nov as four novel subspecies	2004	10.1099/ijs.0.02711-0	Article	English	88	Fardeau, ML; Salinas, MB; L'Haridon, S; Jeanthon, C; Verhe, F; Cayol, JL; Patel, BKC; Garcia, JL; Ollivier, B
205	Staphylococcus epidermidis surfactant peptides promote biofilm maturation and dissemination of biofilm-associated infection in mice	2011	10.1172/jci42520	Article	English	206	Wang, R; Khan, BA; Cheung, GYC; Bach, THL; Jameson-Lee, M; Kong, KF; Queck, SY; Otto, M
206	Sampling for MEOR: Comparison of surface and subsurface sampling and its impact on field applications	2016	10.1016/j.petrol.2016.08.020	Article	English	18	Kruger, M; Dopffel, N; Sitte, J; Mahler, E; Mukherjee, S; Herold, A; Alkan, H
207	Culture-dependent and culture-independent characterization of microbial assemblages associated with high-temperature petroleum reservoirs	2000	10.1128/aem.66.2.700-711.2000	Article	English	363	Orphan, VJ; Taylor, LT; Hafenbradl, D; Delong, EF
208	Influence of the Drilling Mud Formulation Process on the Bacterial Communities in Thermogenic Natural Gas Wells of the Barnett Shale	2011	10.1128/aem.00233-11	Article	English	67	Struchtemeyer, CG; Davis, JP; Elshahed, MS
209	Different Phenotypes of Mature Biofilm in Flavobacterium psychrophilum Share a Potential for Virulence That Differs from Planktonic State	2017	10.3389/fcimb.2017.00076	Article	English	25	Levipan, HA; Avendano-Herrera, R
210	Helicobacter sp recovered from drinking water biofilm sampled from a water distribution system	2001	10.1016/s0043-1354(00)00582-0	Article	English	92	Park, SR; Mackay, WG; Reid, DC
211	Selection and application of microorganisms to improve oil recovery	2004	10.1002/elsc.200420033	Article	English	45	Almeida, PE; Moreira, RS; Almeida, RCC; Guimaraes, AK; Carvalho, AS; Quintella, C; Esperidia, MCA; Taft, C
212	Assigning a role for chemosensory signal transduction in Campylobacter jejuni biofilms using a combined omics approach	2020	10.1038/s41598-020-63569-5	Article	English	5	Tram, G; Klare, WP; Cain, JA; Mourad, B; Cordwell, SJ; Day, CJ; Korolik, V
213	Starting Up Microbial Enhanced Oil Recovery	2014	10.1007/10_2013_256	Article; Book Chapter	English	25	Siegert, M; Sitte, J; Galushko, A; Kruger, M
214	Phylogenetic Diversity of Microorganisms from the Sludge of a Biogas Reactor Processing Oil-Containing and Municipal Waste	2018	10.1134/s0026261718030074	Article	English	14	Nazina, TN; Sokolova, DS; Babich, TL; Semenova, EM; Borzenkov, IA; Bidzhieva, SK; Merkel, AY; Khisametdinov, MR; Tourova, TP
215	Integration of Cyclic di-GMP and Quorum Sensing in the Control of vpsT and aphA in Vibrio cholerae	2011	10.1128/jb.05167-11	Article	English	106	Srivastava, D; Harris, RC; Waters, CM
216	Oil field souring control by nitrate-reducing Sulfurospirillum spp. that outcompete sulfate-reducing bacteria for organic electron donors	2007	10.1128/aem.02332-06	Article	English	220	Hubert, C; Voordouw, G
217	Proposing a rigorous empirical model for estimating the bubble point pressure in heterogeneous carbonate reservoirs	2020	10.26804/ager.2020.02.02	Article	English	2	Rostami, A; Daneshi, A; Miri, R
218	Food-grade D-limonene enhanced a green biocide in the mitigation of carbon steel biocorrosion by a mixed-culture biofilm consortium	2022	10.1007/s00449-021-02685-6	Article	English	2	Unsal, T; Wang, D; Kijkla, P; Kumseranee, S; Punpruk, S; Mohamed, ME; Saleh, MA; Gu, TY
219	In-situ lipopeptide biosurfactant production by Bacillus strains correlates with improved oil recovery in two oil wells approaching their economic limit of production	2013	10.1016/j.ibiod.2012.05.010	Article; Proceedings Paper	English	70	Youssef, N; Simpson, DR; McInerney, MJ; Duncan, KE
220	Differential transcriptome analysis of enterohemorrhagic Escherichia coli strains reveals differences in response to plant-derived compounds	2019	10.1186/s12866-019-1578-4	Article	English	2	Bufe, T; Hennig, A; Klumpp, J; Weiss, A; Nieselt, K; Schmidt, H
221	Metabolites of an Oil Field Sulfide-Oxidizing, Nitrate-Reducing Sulfurimonas sp. Cause Severe Corrosion	2019	10.1128/aem.01891-18	Article	English	22	Lahme, S; Enning, D; Callbeck, CM; Vega, DM; Curtis, TP; Head, IM; Hubert, CRJ
222	Understanding Microbial Community Dynamics in Up-Flow Bioreactors to Improve Mitigation Strategies for Oil Souring	2020	10.3389/fmicb.2020.585943	Article	English	4	Dutta, A; Smith, B; Goldman, T; Walker, L; Streets, M; Eden, B; Dirmeier, R; Bowman, JS
223	CORRELATIONS OF GULF-COAST PETROLEUMS ON THE BASIS OF BRANCHED ACYCLIC ALKANES	1992	10.1016/0146-6380(92)90148-q	Article	English	6	THOMPSON, KFM; KENNICUTT, MC
224	Biofilm Dispersal: Mechanisms, Clinical Implications, and Potential Therapeutic Uses	2010	10.1177/0022034509359403	Review	English	487	Kaplan, JB
225	Bacteriophage T4 multiplication in a glucose-limited Escherichia coli biofilm	2001	10.1139/cjm-47-7-680	Article	English	64	Corbin, BD; McLean, RJC; Aron, GM
226	Interactions of Microbial-Enhanced Oil Recovery Processes	2011	10.1007/s11242-010-9669-6	Article	English	33	Li, JA; Liu, JS; Trefry, MG; Park, J; Liu, KY; Haq, B; Johnston, C; Volk, H
227	Contribution of thermogenic organic matter to the formation of biogenic gas hydrate: Evidence from geochemical and microbial characteristics of hydrate-containing sediments in the Taixinan Basin, South China Sea	2017	10.1016/j.marpetgeo.2016.12.019	Article	English	21	Gong, JL; Sun, XM; Xu, L; Lu, HF
228	Phenotypic and genotypic characterization of biofilm forming, antimicrobial resistant, pathogenic Escherichia coli isolated from Indian dairy and meat products	2021	10.1016/j.ijfoodmicro.2020.108899	Article	English	20	Bhardwaj, DK; Taneja, NK; Shivaprasad, DP; Chakotiya, A; Patel, P; Taneja, P; Sachdev, D; Gupta, S; Sanal, MG
229	Biofilm Formation on Biotic and Abiotic Surfaces in the Presence of Antimicrobials by Escherichia coli Isolates from Cases of Bovine Mastitis	2014	10.1128/aem.01953-14	Article	English	31	Silva, VO; Soares, LO; Silva, A; Mantovani, HC; Chang, YF; Moreira, MAS
230	Bacterial Biofilms: Development, Dispersal, and Therapeutic Strategies in the Dawn of the Postantibiotic Era	2013	10.1101/cshperspect.a010306	Article	English	487	Kostakioti, M; Hadjifrangiskou, M; Hultgren, SJ
231	Phage release from biofilm and planktonic Staphylococcus aureus cells	2005	10.1016/j.femsle.2005.08.048	Article	English	56	Resch, A; Fehrenbacher, B; Eisele, K; Schaller, M; Gotz, F
232	Methylotrophs and Hydrocarbon-Degrading Bacteria Are Key Players in the Microbial Community of an Abandoned Century-Old Oil Exploration Well	2022	10.1007/s00248-021-01748-1	Article	English	2	Rojas-Gatjens, D; Fuentes-Schweizer, P; Rojas-Jimenez, K; Perez-Pantoja, D; Avendano, R; Alpizar, R; Coronado-Ruiz, C; Chavarria, M
233	Autoinducer-2 triggers the oxidative stress response in Mycobacterium avium, leading to biofilm formation	2008	10.1128/aem.02066-07	Article	English	64	Geier, H; Mostowy, S; Cangelosi, GA; Behr, MA; Ford, TE
234	Proteomics analysis of aromatic catabolic pathways in thermophilic Geobacillus thermodenitrificans NG80-2	2012	10.1016/j.jprot.2011.10.035	Article	English	14	Li, YX; Wu, JL; Wang, W; Ding, P; Feng, L
235	A new set of Arabidopsis expressed sequence tags from developing seeds. The metabolic pathway from carbohydrates to seed oil	2000	10.1104/pp.124.4.1582	Article	English	184	White, JA; Todd, T; Newman, T; Focks, N; Girke, T; de Ilarduya, OM; Jaworski, JG; Ohlrogge, JB; Benning, C
236	Nutrient Level Determines Biofilm Characteristics and Subsequent Impact on Microbial Corrosion and Biocide Effectiveness	2020	10.1128/aem.02885-19	Article	English	29	Salgar-Chaparro, SJ; Lepkova, K; Pojtanabuntoeng, T; Darwin, A; Machuca, LL
237	Stability of binary and ternary model oil-field particle suspensions: A multivariate analysis approach	2009	10.1016/j.jcis.2009.05.068	Article	English	16	Dudasova, D; Flaten, GR; Sjoblom, J; Oye, G
238	Transcriptomic Analysis Reveals That Municipal Wastewater Effluent Enhances Vibrio vulnificus Growth and Virulence Potential	2021	10.3389/fmicb.2021.754683	Article	English	0	Velez, KEC; Norman, RS
239	Biofilm Formation by Helicobacter pylori and Its Involvement for Antibiotic Resistance	2015	10.1155/2015/914791	Review	English	57	Yonezawa, H; Osaki, T; Kamiya, S
240	Sub-MIC of antibiotics induced biofilm formation of Pseudomonas aeruginosa in the presence of chlorhexidine	2015	10.1590/s1517-838246120140218	Article	English	36	Aka, ST; Haji, SH
241	Pili contribute to biofilm formation in vitro in Mycobacterium tuberculosis	2013	10.1007/s10482-013-9981-6	Article	English	40	Ramsugit, S; Guma, S; Pillay, B; Jain, P; Larsen, MH; Danaviah, S; Pillay, M
242	A Laboratory Study for Assessing Microbial Enhanced Oil Recovery	2013	10.1080/15567036.2010.492380	Article	English	3	Bao, M; Liu, T; Chen, Z; Guo, L; Jiang, G; Li, Y; Li, X
243	Comparison of sulfide-oxidizing Sulfurimonas strains reveals a new mode of thiosulfate formation in subsurface environments	2020	10.1111/1462-2920.14894	Article	English	13	Lahme, S; Callbeck, CM; Eland, LE; Wipat, A; Enning, D; Head, IM; Hubert, CRJ
244	Geochemical influence on diversity and microbial processes in high temperature oil reservoirs	2003	10.1080/01490450303898	Article	English	53	Orphan, VJ; Goffredi, SK; Delong, EF; Boles, JR
245	Antibiofilm and intraosteoblastic activities of rifamycins against Staphylococcus aureus: promising in vitro profile of rifabutin	2020	10.1093/jac/dkaa061	Article	English	15	Abad, L; Josse, J; Tasse, J; Lustig, S; Ferry, T; Diot, A; Laurent, F; Valour, F
246	Staphylococcal Biofilm Development: Structure, Regulation, and Treatment Strategies	2020	10.1128/mmbr.00026-19	Review	English	136	Schilcher, K; Horswill, AR
247	Vitamin and Amino Acid Auxotrophy in Anaerobic Consortia Operating under Methanogenic Conditions	2017	10.1128/msystems.00038-17	Article	English	16	Hubalek, V; Buck, M; Tan, B; Foght, J; Wendeberg, A; Berry, D; Bertilsson, S; Eiler, A
248	An adherent Gardnerella vaginalis biofilm persists on the vaginal epithelium after standard therapy with oral metronidazole	2008	10.1016/j.ajog.2007.06.039	Article	English	205	Swidsinski, A; Mendling, W; Loening-Baucke, V; Swidsinski, S; Dorffel, Y; Scholze, J; Lochs, H; Verstraelen, H
249	Anaerobic Degradation of Non-Methane Alkanes by "Candidatus Methanoliparia" in Hydrocarbon Seeps of the Gulf of Mexico	2019	10.1128/mbio.01814-19	Article	English	34	Laso-Perez, R; Hahn, C; van Vliet, DM; Tegetmeyer, HE; Schubotz, F; Smit, NT; Pape, T; Sahling, H; Bohrmann, G; Boetius, A; Knittel, K; Wegener, G
250	The Virulence Transcriptional Activator AphA Enhances Biofilm Formation by Vibrio cholerae by Activating Expression of the Biofilm Regulator VpsT	2010	10.1128/iai.00429-09	Article	English	53	Yang, MH; Frey, EM; Liu, Z; Bishar, R; Zhu, J
251	Preliminary Evidence for a Hormetic Effect on DNA Nucleotide Excision Repair in Veterans with Gulf War Illness	2020	10.1093/milmed/usz177	Article	English	4	Latimer, JJ; Alhamed, A; Sveiven, S; Almutairy, A; Klimas, NG; Abreu, M; Sullivan, K; Grant, SG
252	Beta-Lactam Antibiotics Stimulate Biofilm Formation in Non-Typeable Haemophilus influenzae by Up-Regulating Carbohydrate Metabolism	2014	10.1371/journal.pone.0099204	Article	English	21	Wu, S; Li, XJ; Gunawardana, M; Maguire, K; Guerrero-Given, D; Schaudinn, C; Wang, C; Baum, MM; Webster, P
253	Gene expression profiling and identification of resistance genes to low temperature in leaves of peanut (Arachis hypogaea L.)	2014	10.1016/j.scienta.2014.01.043	Article	English	7	Chen, N; Yang, QL; Hu, DQ; Pan, LJ; Chi, XY; Chen, MN; Yang, Z; Wang, T; Wang, M; He, YN; Yu, SL
254	Complete genome sequence of Mahella australiensis type strain (50-1 BONT)	2011	10.4056/sigs.1864526	Article	English	5	Sikorski, J; Teshima, H; Nolan, M; Lucas, S; Hammon, N; Deshpande, S; Cheng, JF; Pitluck, S; Liolios, K; Pagani, I; Ivanova, N; Huntemann, M; Mavromatis, K; Ovchinikova, G; Pati, A; Tapia, R; Han, C; Goodwin, L; Chen, A; Palaniappan, K; Land, M; Hauser, L; Ngatchou-Djao, OD; Rohde, M; Pukall, R; Spring, S; Abt, B; Goker, M; Detter, JC; Woyke, T; Bristow, J; Markowitz, V; Hugenholtz, P; Eisen, JA;…
255	Dental biofilm of symptomatic COVID-19 patients harbours SARS-CoV-2	2021	10.1111/jcpe.13471	Article	English	18	Gomes, SC; Fachin, S; da Fonseca, JG; Angst, PDM; Lamers, ML; da Silva, ISB; Nunes, LN
256	Temperature affects c-di-GMP signalling and biofilm formation in Vibrio cholerae	2015	10.1111/1462-2920.12799	Article	English	59	Townsley, L; Yildiz, FH
257	A Novel Empirical Equation for Relative Permeability in Low Permeability Reservoirs	2014	10.1016/j.cjche.2014.09.031	Article	English	15	Ge, YL; Li, SR; Qu, KX
258	Surfactant formulation for Green Enhanced Oil Recovery	2022	10.1016/j.egyr.2022.05.293	Article	English	1	Al-Ghamdi, A; Haq, B; Al-Shehri, D; Muhammed, NS; Mahmoud, M
259	Biofilm Formation by the Fish Pathogen Flavobacterium columnare: Development and Parameters Affecting Surface Attachment	2013	10.1128/aem.01192-13	Article	English	79	Cai, WL; De La Fuente, L; Arias, CR
260	Assessing the potential risk of oil-field produced waters using a battery of bioassays/biomarkers	2008	10.1007/s00128-008-9465-y	Article	English	17	Li, J; Ma, M; Cui, Q; Wang, ZJ
261	Microbialmetabolic strategies for overcoming low-oxygen in naturalized freshwater reservoirs surrounding the Athabasca Oil Sands: A proxy for End-Pit Lakes?	2019	10.1016/j.scitotenv.2019.02.032	Article	English	7	Reid, T; Droppo, IG; Chaganti, SR; Weisener, CG
262	Long-Term Biocide Efficacy and Its Effect on a Souring Microbial Community	2021	10.1128/aem.00842-21	Article	English	1	Shi, X; Oliveira, DAF; Holsten, L; Steinhauer, K; de Rezende, JR
263	Control of biogenic H2S production with nitrite and molybdate	2001	10.1038/sj.jim.7000142	Article	English	100	Nemati, M; Mazutinec, TJ; Jenneman, GE; Voordouw, G
264	Applications of Microbial-Enhanced Oil Recovery Technology in the Past Decade	2011	10.1080/15567030903330793	Article	English	32	Gao, CH; Zekri, A
265	Anaerobic Degradation of Paraffins by Thermophilic Actinobacteria under Methanogenic Conditions	2020	10.1021/acs.est.0c02071	Article	English	19	Liu, YF; Chen, J; Liu, ZL; Shou, LB; Lin, DD; Zhou, L; Yang, SZ; Liu, JF; Li, W; Gu, JD; Mu, BZ
266	Transcriptional regulation of oil biosynthesis in seed plants: Current understanding, applications, and	2022	10.1016/j.xplc.2022.100328	Review	English	6	Yang, YZ; Kong, Q; Lim, ARQ; Lu, SP; Zhao, H; Guo, L; Yuan, L; Ma, W
267	Practical Use of New Microbiology Tools in Oil Production	2009	10.2118/109104-pa	Article; Proceedings Paper	English	5	Skovhus, TL; Hojris, B; Saunders, AM; Thomsen, TR; Agerbaek, M; Larsen, J
268	Application of a new approach for modeling the oil field formation damage due to mineral scaling	2019	10.2516/ogst/2019032	Article	English	7	Rostami, A; Shokrollahi, A; Shahbazi, K; Ghazanfari, MH
269	Proteomic Analysis of Neisseria gonorrhoeae Biofilms Shows Shift to Anaerobic Respiration and Changes in Nutrient Transport and Outermembrane Proteins	2012	10.1371/journal.pone.0038303	Article	English	50	Phillips, NJ; Steichen, CT; Schilling, B; Post, DMB; Niles, RK; Bair, TB; Falsetta, ML; Apicella, MA; Gibson, BW
270	Response of microbial community and catabolic genes to simulated petroleum hydrocarbon spills in soils/sediments from different geographic locations	2017	10.1111/jam.13549	Article	English	14	Liu, Q; Tang, J; Liu, X; Song, B; Zhen, M; Ashbolt, NJ
271	Microbial gene functions enriched in the Deepwater Horizon deep-sea oil plume	2012	10.1038/ismej.2011.91	Article	English	198	Lu, ZM; Deng, Y; Van Nostrand, JD; He, ZL; Voordeckers, J; Zhou, AF; Lee, YJ; Mason, OU; Dubinsky, EA; Chavarria, KL; Tom, LM; Fortney, JL; Lamendella, R; Jansson, JK; D'haeseleer, P; Hazen, TC; Zhou, JZ
272	Differences in gene expression between the classical and El tor biotypes of vibrio cholerae O1	2006	10.1128/iai.01750-05	Article	English	57	Beyhan, S; Tischler, AD; Camilli, A; Yildiz, FH
273	Virulence Phenotype, Physicochemical Properties, and Biofilm Formation of Pseudomonas aeruginosa on Polyethylene Used in Drinking Water Distribution Systems	2015	10.1134/s0097807815010042	Article	English	2	Zineba, G; Hassan, L; Mostafa, M; Abdellah, H; Mohammed, T; El Mostafa, M
274	Ammonium removal from high-salinity oilfield-produced water: assessing the microbial community dynamics at increasing salt concentrations	2017	10.1007/s00253-016-7902-0	Article	English	23	Quartaroli, L; Silva, LCF; Silva, CM; Lima, HS; de Paula, SO; de Oliveira, VM; da Silva, MDS; Kasuya, MCM; de Sousa, MP; Torres, APR; Souza, RS; Bassin, JP; da Silva, CC
275	Oil biodegradation by Bacillus strains isolated from the rock of an oil reservoir located in a deep-water production basin in Brazil	2006	10.1007/s00253-006-0531-2	Article	English	53	da Cunha, CD; Rosado, AS; Sebastian, GV; Seldin, L; von der Weid, I
276	Bacteriophage Ecology in Escherichia coli and Pseudomonas aeruginosa Mixed-Biofilm Communities	2011	10.1128/aem.01797-10	Article	English	62	Kay, MK; Erwin, TC; McLean, RJC; Aron, GM
277	Sediment cooling triggers germination and sulfate reduction by heat-resistant thermophilic spore-forming bacteria	2020	10.1111/1462-2920.14866	Article	English	10	Bell, E; Sherry, A; Pilloni, G; Suarez-Suarez, A; Cramm, MA; Cueto, G; Head, IM; Hubert, CRJ
278	Long-term succession in a coal seam microbiome during in situ biostimulation of coalbed-methane generation	2019	10.1038/s41396-018-0296-5	Article	English	28	Beckmann, S; Luk, AWS; Gutierrez-Zamora, ML; Chong, NHH; Thomas, T; Lee, M; Manefield, M
279	Human Bile-Mediated Regulation of Salmonella Curli Fimbriae	2019	10.1128/jb.00055-19	Article	English	13	Gonzalez, JF; Tucker, L; Fitch, J; Wetzel, A; White, P; Gunn, JS
280	Ciliated protists from the nepheloid layer and water column of sites affected by the Deepwater Horizon oil spill in the Northeastern Gulf of Mexico	2015	10.1016/j.dsr.2015.10.001	Article	English	12	Moss, JA; McCurry, C; Tominack, S; Romero, IC; Hollander, D; Jeffrey, WH; Snyder, RA
281	Microbiologically influenced corrosion as a function of environmental conditions: A laboratory study using oilfield multispecies biofilms	2020	10.1016/j.corsci.2020.108595	Article	English	10	Salgar-Chaparro, SJ; Lepkova, K; Pojtanabuntoeng, T; Darwin, A; Machuca, LL
282	Methanogens Within a High Salinity Oil Reservoir From the Gulf of Mexico	2020	10.3389/fmicb.2020.570714	Article	English	2	Christman, GD; Leon-Zayas, RI; Summers, ZM; Biddle, JF
283	Taxonomic study of aerobic thermophilic bacilli: descriptions of Geobacillus subterraneus gen. nov., sp nov and Geobacillus uzenensis sp nov from petroleum reservoirs and transfer of Bacillus stearothermophilus Bacillus thermocatenulatus, Bacillus thermoleovorans, Bacillus kaustophilus, Bacillus thermoglucosidasius and Bacillus thermodenitrificans to Geobacillus as the new combinations G-stearoth…	2001	10.1099/00207713-51-2-433	Article	English	549	Nazina, TN; Tourova, TP; Poltaraus, AB; Novikova, EV; Grigoryan, AA; Ivanova, AE; Lysenko, AM; Petrunyaka, VV; Osipov, GA; Belyaev, SS; Ivanov, MV
284	Screening of Escherichia coli Species Biodiversity Reveals New Biofilm-Associated Antiadhesion Polysaccharides	2011	10.1128/mbio.00043-11	Article	English	59	Rendueles, O; Travier, L; Latour-Lambert, P; Fontaine, T; Magnus, J; Denamur, E; Ghigo, JM
285	Chemical and microbial composition of sediments in reservoirs with different trophic state	2003	10.1002/iroh.200310596	Article	English	9	Maassen, S; Roske, I; Uhlmann, D
286	Influence of low salinity stress on virulence and biofilm formation potential in Vibrio alginolyticus, isolated from the Gulf of Khambhat, Gujarat India	2015	10.1051/alr/2016004	Article	English	5	Dayma, P; Raval, IH; Joshi, N; Patel, NP; Haldar, S; Mody, KH
287	Biodegradation of high molecular weight PAHs using isolated yeast mixtures: application of meta-genomic methods for community structure analyses	2012	10.1007/s11356-012-0919-8	Article	English	28	Hesham, AEL; Khan, S; Tao, Y; Li, D; Zhang, Y; Yang, M
288	Discovery of agents that eradicate leukemia stem cells using an in silico screen of public gene expression data	2008	10.1182/blood-2007-11-126003	Article	English	137	Hassane, DC; Guzman, ML; Corbett, C; Li, XJ; Abboud, R; Young, F; Liesveld, JL; Carroll, M; Jordan, CT
289	Time Series Analysis of Production Decline in Carbonate Reservoirs with Machine Learning	2021	10.1155/2021/6638135	Article	English	2	Wang, LQ; Shao, MJ; Kou, G; Wang, MX; Zhang, RC; Wei, ZZ; Sun, X
290	Quorum Sensing Autoinducer(s) and Flagellum Independently Mediate EPS Signaling in Vibrio cholerae Through LuxO-Independent Mechanism	2019	10.1007/s00248-018-1262-5	Article	English	7	Biswas, S; Mukherjee, P; Manna, T; Dutta, K; Guchhait, KC; Karmakar, A; Karmakar, M; Dua, P; Panda, AK; Ghosh, C
291	Origins of variation in the fungal cell surface	2004	10.1038/nrmicro927	Review	English	148	Verstrepen, KJ; Reynolds, TB; Fink, GR
292	Adhesion, biofilm formation, cell surface hydrophobicity, and antifungal planktonic susceptibility: relationship among Candida spp.	2015	10.3389/fmicb.2015.00205	Article	English	126	Silva-Dias, A; Miranda, IM; Branco, J; Monteiro-Soares, M; Pina-Vaz, C; Rodrigues, AG
293	Modeling reactive flow on carbonates with realistic porosity and permeability fields	2020	10.1016/j.advwatres.2020.103564	Article	English	6	Ferreira, LD; Surmas, R; Tonietto, SN; da Silva, MAP; Pecanha, RP
294	Long-term starvation survival of a thermophilic sulfidogen consortium	1998	10.1080/01490459809378060	Article	English	6	Bass, CJ; Davey, RA; Lappin-Scott, HM
295	Metabolic Versatility and Indigenous Origin of the Archaeon Thermococcus sibiricus, Isolated from a Siberian Oil Reservoir, as Revealed by Genome Analysis	2009	10.1128/aem.00718-09	Article	English	75	Mardanov, AV; Ravin, NV; Svetlitchnyi, VA; Beletsky, AV; Miroshnichenko, ML; Bonch-Osmolovskaya, EA; Skryabin, KG
296	Genome sequence of the moderately thermophilic, amino-acid-degrading and sulfur-reducing bacterium Thermovirga lienii type strain (Cas60314(T))	2012	10.4056/sigs.2726028	Article	English	21	Goker, M; Saunders, E; Lapidus, A; Nolan, M; Lucas, S; Hammon, N; Deshpande, S; Cheng, JF; Han, C; Tapia, R; Goodwin, LA; Pitluck, S; Liolios, K; Mavromatis, K; Pagani, I; Ivanova, N; Mikhailova, N; Pati, A; Chen, A; Palaniappan, K; Land, M; Chang, YJ; Jeffries, CD; Brambilla, EM; Rohde, M; Spring, S; Detter, JC; Woyke, T; Bristow, J; Eisen, JA; Markowitz, V; Hugenholtz, P; Kyrpides, NC; Klenk, HP
297	Transcriptome analysis of Porphyromonas gingivalis and Acinetobacter baumannii in polymicrobial communities	2018	10.1111/omi.12238	Article	English	14	Miller, DP; Wang, Q; Weinberg, A; Lamont, RJ
298	Anaerobic biosynthesis of rhamnolipids by Pseudomonas aeruginosa: performance, mechanism and its application potential for enhanced oil recovery	2021	10.1186/s12934-021-01593-4	Article	English	6	Zhao, F; Wang, QZ; Zhang, Y; Lei, LY
299	Isolation and Characterization of Methanothermobacter crinale sp nov., a Novel Hydrogenotrophic Methanogen from the Shengli Oil Field	2011	10.1128/aem.00210-11	Article	English	64	Cheng, L; Dai, LR; Li, X; Zhang, H; Lu, YH
300	Low-level predation by lytic phage phiIPLA-RODI promotes biofilm formation and triggers the stringent response in Staphylococcus aureus	2017	10.1038/srep40965	Article	English	32	Fernandez, L; Gonzalez, S; Campelo, AB; Martinez, B; Rodriguez, A; Garcia, P
301	The Microbial Community and Functional Potential in the Midland Basin Reveal a Community Dominated by Both Thiosulfate and Sulfate-Reducing Microorganisms		10.1128/spectrum.00049-22	Article; Early Access	English	0	Tinker, K; Lipus, D; Gardiner, J; Stuckman, M; Gulliver, D
302	Diversity of the alkB Genes of n-Alkane Biodegradation in Thermophilic Hydrocarbon-Oxidizing Bacteria of the Genera Geobacillus, Parageobacillus, and Aeribacillus	2018	10.1134/s002626171803013x	Article	English	4	Tourova, TP; Sokolova, DS; Semenova, EM; Poltaraus, AB; Nazina, TN
303	CONTROLLED RELEASE OF CHLORHEXIDINE FROM A MESOPOROUS SILICA-CONTAINING MACROPOROUS TITANIUM DENTAL IMPLANT PREVENTS MICROBIAL BIOFILM FORMATION	2017	10.22203/ecm.v033a02	Article	English	19	De Cremer, K; Braem, A; Gerits, E; De Brucker, K; Vandamme, K; Martens, JA; Michiels, J; Vleugels, J; Cammue, BPA; Thevissen, K
304	Improvement of lichenysin production in Bacillus licheniformis by replacement of native promoter of lichenysin biosynthesis operon and medium optimization	2014	10.1007/s00253-014-5978-y	Article	English	52	Qiu, YM; Xiao, F; Wei, XT; Wen, ZY; Chen, SW
305	Antifungal resistance of candidal biofilms formed on denture acrylic in vitro	2001	10.1177/00220345010800031101	Article	English	390	Chandra, J; Mukherjee, PK; Leidich, SD; Faddoul, FF; Hoyer, LL; Douglas, LJ; Ghannoum, MA
306	MstX and a Putative Potassium Channel Facilitate Biofilm Formation in Bacillus subtilis	2013	10.1371/journal.pone.0060993	Article	English	40	Lundberg, ME; Becker, EC; Choe, S
307	Biofilms in drinking water systems: a possible reservoir for Helicobacter pylori	1999	10.1111/j.1365-2672.1998.tb05283.x	Article; Proceedings Paper	English	26	Mackay, WG; Gribbon, LT; Barer, MR; Reid, DC
308	Anaerobic biodegradation of aromatic hydrocarbons: Pathways and prospects	2008	10.1159/000121324	Review	English	185	Foght, J
309	Can HIV be cured? Mechanisms of HIV persistence and strategies to combat it	2004	10.2174/1570162043484915	Review	English	73	Hamer, DH
310	Tandem Mass Tag-Based Quantitative Proteomics Reveals Implication of a Late Embryogenesis Abundant Protein (BnLEA57) in Seed Oil Accumulation in Brassica napus L.	2022	10.3389/fpls.2022.907244	Article	English	0	Zhou, ZJ; Lin, BG; Tan, JJ; Hao, PF; Hua, SJ; Deng, ZP
311	Genomic and Transcriptomic Evidence Supports Methane Metabolism in Archaeoglobi	2020	10.1128/msystems.00651-19	Article	English	6	Liu, YF; Chen, J; Zaramela, LS; Wang, LY; Mbadinga, SM; Hou, ZW; Wu, XL; Gu, JD; Zengler, K; Mu, BZ
312	Study of asphaltenes adsorption onto different minerals and clays Part 2. Particle characterization and suspension stability	2009	10.1016/j.colsurfa.2008.10.041	Article	English	39	Dudasova, D; Flaten, GR; Sjoblom, J; Oye, G
313	Geochemical effects of rapid sedimentation in aquatic systems: minimal diagenesis and the preservation of historical metal signatures	2000	10.1023/a:1008114630756	Article; Proceedings Paper	English	36	Callender, E
314	Potential impacts of oxygen impurities in carbon capture and storage on microbial community composition and activity	2021	10.1016/j.ijggc.2021.103479	Article	English	1	Morgan, H; Large, DJ; Bateman, K; Hanstock, D; Gregory, SP
315	Investigating the role of the carbon storage regulator A (CsrA) in Leptospira spp.	2021	10.1371/journal.pone.0260981	Article	English	1	Phoka, T; Fule, L; Da Fonseca, JP; Cokelaer, T; Picardeau, M; Patarakul, K
316	Eap1p, an adhesin that mediates Candida albicans biofilm formation in vitro and in vivo	2007	10.1128/ec.00049-07	Article	English	101	Li, F; Svarovsky, MJ; Karlsson, AJ; Wagner, JP; Marchillo, K; Oshel, P; Andes, D; Palecek, SP
317	Spermine inhibits Vibrio cholerae biofilm formation through the NspS-MbaA polyamine signaling system	2017	10.1074/jbc.m117.801068	Article	English	24	Sobe, RC; Bond, WG; Wotanis, CK; Zayner, JP; Burriss, MA; Fernandez, N; Bruger, EL; Waters, CM; Neufeld, HS; Karatan, E
318	Co-delivery of ciprofloxacin and colistin using microcontainers for bacterial biofilm treatment	2021	10.1016/j.ijpharm.2021.120420	Article	English	3	Birk, SE; Mazzoni, C; Javed, MM; Hansen, MB; Johansen, HK; Haagensen, JAJ; Molin, S; Nielsen, LH; Boisen, A
319	Co-culture with Acinetobacter johnsonii enhances benzalkonium chloride resistance in Salmonella enterica via triggering lipid A modifications	2022	10.1016/j.ijfoodmicro.2022.109905	Article	English	0	Wilson, A; Fegan, N; Turner, MS
320	Genomewide transcriptional response of Escherichia coli O157:H7 to norepinephrine	2022	10.1186/s12864-021-08167-z	Article	English	2	Sharma, VK; Akavaram, S; Bayles, DO
321	Molecular Probes to Evaluate the Synthesis and Production Potential of an Odorous Compound (2-methylisoborneol) in Cyanobacteria	2020	10.3390/ijerph17061933	Article	English	6	Kim, K; Yoon, Y; Cho, H; Hwang, SJ
322	The frequently occurring components of essential oils beta elemene and R-limonene alter expression of dprE1 and clgR genes of Mycobacterium tuberculosis H37Ra	2018	10.1016/j.fct.2017.12.052	Article	English	8	Sawicki, R; Sieniawska, E; Swatko-Ossor, M; Golus, J; Ginalska, G
323	Identification of genes induced in Vibrio cholerae in a dynamic biofilm system	2014	10.1016/j.ijmm.2014.05.011	Article	English	21	Seper, A; Pressler, K; Kariisa, A; Haid, AG; Roier, S; Leitner, DR; Reidl, J; Tamayo, R; Schild, S
324	Staying Alive: Vibrio cholerae's Cycle of Environmental Survival, Transmission, and Dissemination	2016	10.1128/microbiolspec.vmbf-0015-2015	Article	English	4	Conner, JG; Teschler, JK; Jones, CJ; Yildiz, FH
325	The Histidine Kinase BinK Is a Negative Regulator of Biofilm Formation and Squid Colonization	2016	10.1128/jb.00037-16	Article; Proceedings Paper	English	24	Brooks, JF; Mandel, MJ
326	Adipose tissue aging: mechanisms and therapeutic implications	2022	10.1038/s41419-022-04752-6	Review	English	8	Ou, MY; Zhang, H; Tan, PC; Zhou, SB; Li, QF
327	Direct-write assembly of microperiodic silk fibroin scaffolds for tissue engineering applications	2008	10.1002/adfm.200800040	Article	English	212	Ghosh, S; Parker, ST; Wang, XY; Kaplan, DL; Lewis, JA
328	RNA-seq transcriptome analysis of the immature seeds of two Brassica nopus lines with extremely different thousand-seed weight to identify the candidate genes related to seed weight	2018	10.1371/journal.pone.0191297	Article	English	9	Geng, XX; Dong, N; Wang, YQ; Li, G; Wang, LJ; Guo, XJ; Li, JB; Wen, ZP; Wei, WH
329	Genome-wide CRISPR knockout screen identifies ZNF304 as a silencer of HIV transcription that promotes viral latency	2020	10.1371/journal.ppat.1008834	Article	English	17	Krasnopolsky, S; Kuzmina, A; Taube, R
330	Growth Kinetics, Carbon Isotope Fractionation, and Gene Expression in the Hyperthermophile Methanocaldococcus jannaschii during Hydrogen-Limited Growth and Interspecies Hydrogen Transfer	2019	10.1128/aem.00180-19	Article	English	11	Topcuoglu, BD; Meydan, C; Nguyen, TB; Lang, SQ; Holden, JF
331	Quantifying the biofilm effects on phosphorus adsorption of sediment	2021	10.1007/s11368-020-02851-5	Article	English	1	Chen, YS; Huang, L; Li, XC
332	Marine biofilms on submerged surfaces are a reservoir for Escherichia coli and Vibrio cholerae	2010	10.1080/08927010903282814	Article	English	65	Shikuma, NJ; Hadfield, MG
333	Sex and habitat drive hantavirus prevalence in marsh rice rat populations impacted by the Deepwater Horizon oil spill	2022	10.1002/ecs2.3929	Article	English	0	Perez-Umphrey, AA; Jonsson, CB; Bonisoli-Alquati, A; Snider, AM; Stouffer, PC; Taylor, SS
334	Code blue: Acinetobacter baumannii, a nosocomial pathogen with a role in the oral cavity	2015	10.1111/omi.12072	Review	English	32	Richards, AM; Abu Kwaik, Y; Lamont, RJ
335	Airborne bacteria and antibiotic resistance genes in hospital rooms	2010	10.1007/s10453-010-9155-1	Article	English	48	Gilbert, Y; Veillette, M; Duchaine, C
336	Metagenomics of Hydrocarbon Resource Environments Indicates Aerobic Taxa and Genes to be Unexpectedly Common	2013	10.1021/es4020184	Article	English	125	An, DS; Caffrey, SM; Soh, J; Agrawal, A; Brown, D; Budwill, K; Dong, XL; Dunfield, PF; Foght, J; Gieg, LM; Hallam, SJ; Hanson, NW; He, ZG; Jack, TR; Klassen, J; Konwar, KM; Kuatsjah, E; Li, C; Larter, S; Leopatra, V; Nesbo, CL; Oldenburg, T; Page, AP; Ramos-Padron, E; Rochman, FF; Saidi-Mehrabad, A; Sensen, CW; Sipahimalani, P; Song, YC; Wilson, S; Wolbring, G; Wong, ML; Voordouw, G
337	Experimental Evidence for Microbially Mediated Carbonate Dissolution from the Saline Water Zone of the Edwards Aquifer, Central Texas	2011	10.1080/01490451.2010.500197	Article	English	14	Engel, AS; Randall, KW
338	Functional Divergence of Hsp90 Genetic Interactions in Biofilm and Planktonic Cellular States	2015	10.1371/journal.pone.0137947	Article	English	10	Diezmann, S; Leach, MD; Cowen, LE
339	Rates of Sulfate Reduction by Microbial Biofilms That Form on Shale Fracture Walls within a Microfluidic Testbed	2022	10.1021/acsestengg.2c00048	Article	English	0	Zhou, L; Michelson, K; Fried, G; Sanford, RA; Sivaguru, M; Bhattacharjee, AS; Deng, JZ; Fouke, BW; Valocchi, AJ; Werth, CJ
340	MicroRNA and circular RNA profiling in the deposited fat tissue of Sunite sheep	2022	10.3389/fvets.2022.954882	Article	English	0	He, XG; Wu, RH; Yun, YY; Qin, X; Huang, YJ; Chen, L; Han, YF; Wu, JD; Sha, LN; Borjigin, G
341	Dew point pressure prediction based on mixed-kernels-function support vector machine in gas-condensate reservoir	2018	10.1016/j.fuel.2018.05.168	Article	English	20	Zhong, Z; Liu, SY; Kazemi, M; Carr, TR
342	A novel biodemulsifier of Bacillus mojavensis XH1-Oxalate decarboxylase with the potential for demulsification of oilfield emulsion	2021	10.1016/j.jhazmat.2020.124737	Article	English	19	Hou, N; Wang, QR; Sun, Y; Li, XY; Song, QY; Jiang, XX; Li, BX; Zhao, XY; Zang, HL; Li, DP; Li, CY
343	Smart learning strategy for predicting viscoelastic surfactant (VES) viscosity in oil well matrix acidizing process using a rigorous mathematical approach	2021	10.1007/s42452-021-04799-8	Article	English	3	Mahdaviara, M; Rostami, A; Shahbazi, K
344	CytR Is a Global Positive Regulator of Competence, Type VI Secretion, and Chitinases in Vibrio cholerae	2015	10.1371/journal.pone.0138834	Article	English	38	Watve, SS; Thomas, J; Hammer, BK
345	Eukaryotic community diversity and spatial variation during drinking water production (by seawater desalination) and distribution in a full-scale network	2017	10.1039/c6ew00265j	Article	English	9	Belila, A; El-Chakhtoura, J; Saikaly, PE; van Loosdrecht, MCM; Vrouwenvelder, JS
346	Molecular analysis of shower curtain biofilm microbes	2004	10.1128/aem.70.7.4187-4192.2004	Article	English	101	Kelley, ST; Theisen, U; Angenent, LT; Amand, AS; Pace, NR
347	Some Characteristics of the Microbial Community of Reservoir Fluids of the Romashkinskoe Field	2022	10.26907/2542-064x.2022.2.263-278	Article	English	1	Biktasheva, LR; Selivanovskaya, SY; Mukhtarova, RA; Abdaljialil, H; Galitskaya, PY
348	Bats are a potential reservoir of pathogenic Leptospira species in Colombia	2019	10.3855/jidc.10642	Article	English	8	Mateus, J; Gomez, N; Herrera-Sepulveda, MT; Hidalgo, M; Perez-Torres, J; Cuervo, C
349	Polyphasic analysis of an Azoarcus-Leptothrix-dominated bacterial biofilm developed on stainless steel surface in a gasoline-contaminated hypoxic groundwater	2016	10.1007/s11356-016-6128-0	Article	English	20	Benedek, T; Tancsics, A; Szabo, I; Farkas, M; Szoboszlay, S; Fabian, K; Maroti, G; Kriszt, B
350	Microbial effects on hydraulic conductivity estimation by single-well injection tests in a petroleum-contaminated aquifer	2019	10.1016/j.jhydrol.2019.03.031	Article	English	6	Zhu, Q; Wen, Z; Liu, H
351	Phylogenetic Diversity and Potential Activity of Bacteria and Fungi in the Deep Subsurface Horizons of an Uranium Deposit	2021	10.1134/s0026261721040032	Article	English	2	Babich, TL; Semenova, EM; Sokolova, DS; Tourova, TP; Bidzhieva, SK; Loiko, NG; Avdonin, GI; Lutsenko, NI; Nazina, TN
352	Sewers as potential reservoirs of antibiotic resistance	2017	10.1016/j.scitotenv.2017.06.153	Article	English	78	Auguet, O; Pijuan, M; Borrego, CM; Rodriguez-Mozaz, S; Triado-Margarit, X; Della Giustina, SV; Gutierrez, O
353	Reliable method for the determination of surfactant retention in porous media during chemical flooding oil recovery	2015	10.1016/j.fuel.2015.05.013	Article	English	23	Kamari, A; Sattari, M; Mohammadi, AH; Ramjugernath, D
354	Lipidomics and RNA sequencing reveal a novel subpopulation of nanovesicle within extracellular matrix biomaterials	2020	10.1126/sciadv.aay4361	Article	English	26	Hussey, GS; Molina, CP; Cramer, MC; Tyurina, YY; Tyurin, VA; Lee, YC; El-Mossier, SO; Murdock, MH; Timashev, PS; Kagan, VE; Badylak, SF
355	Novel dental adhesive with triple benefits of calcium phosphate recharge, protein-repellent and antibacterial functions	2017	10.1016/j.dental.2017.03.002	Article	English	37	Xie, XJ; Wang, L; Xing, D; Zhang, K; Weir, MD; Liu, HB; Bai, YX; Xu, HHK
356	Rock-Hosted Subsurface Biofilms: Mineral Selectivity Drives Hotspots for Intraterrestrial Life	2021	10.3389/fmicb.2021.658988	Article	English	8	Casar, CP; Kruger, BR; Osburn, MR
357	Characterization of Origin and Evolution of Formation Water in Buried Hill of Jizhong Depression, China, Using Multivariate Statistical Analysis of Geochemical Data	2017	10.1155/2017/5290686	Article	English	5	Li, F; Zeng, JH
358	Accurate model based on artificial intelligence for prediction of carbon dioxide solubility in aqueous tetra-n-butylammonium bromide solutions	2018	10.1002/cem.2956	Article	English	6	Hoseinpour, SA; Barati-Harooni, A; Nadali, P; Mohebbi, A; Najafi-Marghmaleki, A; Tatar, A; Bahadori, A
359	Inhibition of Campylobacter jejuni Biofilm Formation by D-Amino Acids	2020	10.3390/antibiotics9110836	Article	English	9	Elgamoudi, BA; Taha, T; Korolik, V
360	The shielding effect of wild type iron reducing bacterial flora on the corrosion of linepipe steel	2013	10.1016/j.engfailanal.2013.05.020	Article	English	33	AlAbbas, FM; Bhola, SM; Spear, JR; Olson, DL; Mishra, B
361	Application of beta-Resorcylic Acid as Potential Antimicrobial Feed Additive to Reduce Campylobacter Colonization in Broiler Chickens	2017	10.3389/fmicb.2017.00599	Article	English	27	Wagle, BR; Upadhyay, A; Arsi, K; Shrestha, S; Venkitanarayanan, K; Donoghue, AM; Donoghue, DJ
362	PROTECTIVE EFFECT OF GLYCINE BETAINE ON SURVIVAL OF ESCHERICHIA-COLI-CELLS IN MARINE ENVIRONMENTS	1991	10.2166/wst.1991.0043	Article; Proceedings Paper	English	11	GAUTHIER, MJ; FLATAU, GN; BREITTMAYER, VA
363	Functional characterization of a biosurfactant-producing thermo-tolerant bacteria isolated from an oil reservoir	2011	10.1007/s12182-011-0152-y	Article	English	14	Wang, J; Ji, G; Tian, J; Zhang, HD; Dong, HP; Yu, L
364	Growth and genome-based insights of Fe(III) reduction of the high-temperature and NaCl-tolerant Shewanella xiamenensis from Changqing oilfield of China	2022	10.3389/fmicb.2022.1028030	Article	English	0	Yang, JN; Zhao, D; Liu, T; Zhang, S; Wang, WD; Yan, L; Gu, JD
365	Bacterial diversity and ecosystem function of filamentous microbial mats from aphotic (cave) sulfidic springs dominated by chemolithoautotrophic "Epsilonproteobacteria"	2004	10.1016/j.femsec.2004.07.004	Review	English	137	Engel, AS; Porter, ML; Stern, LA; Quinlan, S; Bennett, PC
366	Metabolic Traits of Bovine Shiga Toxin-ProducingEscherichia coli(STEC) Strains with Different Colonization Properties	2020	10.3390/toxins12060414	Article	English	2	Barth, SA; Weber, M; Schaufler, K; Berens, C; Geue, L; Menge, C
367	Global transcriptomic changes occur in uterine fluid-derived extracellular vesicles during the endometrial window for embryo implantation	2021	10.1093/humrep/deab123	Article	English	19	Giacomini, E; Scotti, GM; Vanni, VS; Lazarevic, D; Makieva, S; Privitera, L; Signorelli, S; Cantone, L; Bollati, V; Murdica, V; Tonon, G; Papaleo, E; Candiani, M; Vigano, P
368	Water reservoir maintained by cell growth fuels the spreading of a bacterial swarm	2012	10.1073/pnas.1118238109	Article	English	35	Wu, YL; Berg, HC
369	RNA metabarcoding helps reveal zooplankton community response to environmental stressors	2022	10.1016/j.envpol.2021.118446	Article	English	0	Ankley, PJ; Xie, YW; Havens, S; Peters, L; Timlick, L; Rodriguez-Gil, JL; Giesy, JP; Palace, VP
370	Polycyclic aromatic hydrocarbons in the cestode Oncomegas wageneri parasite of Mexican flounder Cyclopsetta chittendeni	2020	10.1007/s00436-019-06597-z	Article	English	7	Soler-Jimenez, LC; Hernandez-Nunez, E; Velazquez-Abunader, I; Centeno-Chale, A; Vidal-Martinez, VM
371	Neisserial Molecular Adaptations to the Nasopharyngeal Niche	2015	10.1016/bs.ampbs.2015.05.001	Review; Book Chapter	English	18	Laver, JR; Hughes, SE; Read, RC
372	Independence of Nitrate and Nitrite Inhibition of Desulfovibrio vulgaris Hildenborough and Use of Nitrite as a Substrate for Growth	2015	10.1021/es504484m	Article	English	14	Korte, HL; Saini, A; Trotter, VV; Butland, GP; Arkin, AP; Wall, JD
373	Water droplets in oil are microhabitats for microbial life	2014	10.1126/science.1252215	Article	English	91	Meckenstock, RU; von Netzer, F; Stumpp, C; Lueders, T; Himmelberg, AM; Hertkorn, N; Schmitt-Kopplin, P; Harir, M; Hosein, R; Haque, S; Schulze-Makuch, D
374	Bathiapeptides: Polythiazole-Containing Peptides from a Marine Biofilm-Derived Bacillus sp.		10.1021/acs.jnatprod.2c00290	Article; Early Access	English	0	Wu, CH; Tang, JW; Malit, JJL; Wang, RJ; Sung, HHY; Williams, ID; Qian, PY
375	Isolation and characterization of a novel phenanthrene (PHE) degrading strain Psuedomonas sp. USTB-RU from petroleum contaminated soil	2013	10.1016/j.jhazmat.2013.10.007	Article	English	46	Masakorala, K; Yao, J; Cai, MM; Chandankere, R; Yuan, HY; Chen, HL
376	Microscopic Detection of Viable Staphylococcus epidermidis in Peri-Implant Tissue in Experimental Biomaterial-Associated Infection, Identified by Bromodeoxyuridine Incorporation	2010	10.1128/iai.00849-09	Article	English	25	Broekhuizen, CAN; Sta, M; Vandenbroucke-Grauls, CMJE; Zaat, SAJ
377	Listeria monocytogenes isolates from Cornu aspersum snails: Whole genome-based characterization and host-pathogen interactions in a snail infection model	2022	10.1016/j.fsi.2022.03.028	Article	English	0	Kotzamanidis, C; Malousi, A; Dushku, E; Dobly, A; Keersmaecker, SCJD; Roosens, NH; Karathodorou, A; Staikou, A; Zdragas, A; Yiangou, M
378	Enrichment of free-living amoebae in biofilms developed at upper water levels in drinking water storage towers: An inter- and intra-seasonal study	2018	10.1016/j.scitotenv.2018.03.178	Article	English	17	Taravaud, A; Ali, M; Lafosse, B; Nicolas, V; Feliers, C; Thibert, S; Levi, Y; Loiseau, PM; Pomel, S
379	New insights into the spatial variability of biofilm communities and potentially negative bacterial groups in hydraulic concrete structures	2017	10.1016/j.watres.2017.06.055	Article	English	23	Cai, W; Li, Y; Niu, LH; Zhang, WL; Wang, C; Wang, PF; Meng, FG
380	Bile Acids and Bicarbonate Inversely Regulate Intracellular Cyclic di-GMP in Vibrio cholerae	2014	10.1128/iai.01664-14	Article	English	53	Koestler, BJ; Waters, CM
381	Fresh Crab Plays an Important Role as a Nutrient Reservoir for the Rapid Propagation of Vibrio vulnificus	2021	10.3389/fmicb.2021.645860	Article	English	1	Kim, S; Chung, HY; Kwon, JG; Choi, SH; Lee, JH
382	A comprehensive and comparative study on the action of pentacyclic triterpenoids on Vibrio cholerae biofilms	2020	10.1016/j.micpath.2020.104493	Article	English	4	Bhattacharya, SP; Bhattacharya, A; Sen, A
383	High potential of adhesion to biotic and abiotic surfaces by opportunistic Staphylococcus aureus strains isolated from orthodontic appliances	2016	10.1016/j.micpath.2015.11.009	Article	English	15	Merghni, A; Ben Nejma, M; Dallel, I; Tobji, S; Ben Amor, A; Janel, S; Lafont, F; Aouni, M; Mastouri, M
384	Bioremediation of various aromatic and emerging pollutants by Bacillus cereus sp. isolated from petroleum sludge	2021	10.2166/wst.2021.065	Article	English	4	Alhefeiti, MA; Athamneh, K; Vijayan, R; Ashraf, SS
385	Parallel evolution leading to impaired biofilm formation in invasive Salmonella strains	2019	10.1371/journal.pgen.1008233	Article	English	20	MacKenzie, KD; Wang, YJ; Musicha, P; Hansen, EG; Palmer, MB; Herman, DJ; Feasey, NA; White, AP
386	Discovery of the non-cosmopolitan lineages in Candidatus Thermoprofundales	2022	10.1111/1462-2920.15965	Article	English	1	Liu, YF; Yang, L; Liu, ZL; Chen, J; Fang, B; Zhou, L; Liu, JF; Yang, SZ; Gu, JD; Mu, BZ
387	Characterization and genomic analysis of a nitrate reducing bacterium from shale oil in the Ordos Basin and the associated biosurfactant production	2022	10.1016/j.jece.2022.108776	Article	English	0	Xu, YY; Wei, FD; Xu, R; Cheng, T; Ma, YL
388	Phomopsis tersa as Inhibitor of Quorum Sensing System and Biofilm Forming Ability of Pseudomonas aeruginosa	2020	10.1007/s12088-019-00840-y	Article	English	14	Meena, H; Mishra, R; Ranganathan, S; Sarma, VV; Ampasala, DR; Kalia, VC; Lee, JK; Siddhardha, B
389	Can Preening Contribute to Influenza A Virus Infection in Wild Waterbirds?	2010	10.1371/journal.pone.0011315	Article	English	30	Delogu, M; De Marco, MA; Di Trani, L; Raffini, E; Cotti, C; Puzelli, S; Ostanello, F; Webster, RG; Cassone, A; Donatelli, I
390	Kosmotoga olearia gen. nov., sp nov., a thermophilic, anaerobic heterotroph isolated from an oil production fluid	2009	10.1099/ijs.0.008045-0	Article	English	82	DiPippo, JL; Nesbo, CL; Dahle, H; Doolittle, WF; Birkland, NK; Noll, KM
391	Enhanced removal of veterinary antibiotic from wastewater by photoelectroactive biofilm of purple anoxygenic phototroph through photosynthetic electron uptake	2020	10.1016/j.scitotenv.2020.136605	Article	English	6	Sun, J; Yang, P; Huang, SZ; Li, N; Zhang, YP; Yuan, Y; Lu, XW
392	Flocculation, adhesion and biofilm formation in yeasts	2006	10.1111/j.1365-2958.2006.05072.x	Review	English	420	Verstrepen, KJ; Klis, FM
393	Connecting Environment and Genome Plasticity in the Characterization of Transformation-Induced SOS Regulation and Carbon Catabolite Control of the Vibrio cholerae Integron Integrase	2012	10.1128/jb.05982-11	Article	English	55	Baharoglu, Z; Krin, E; Mazel, D
394	Cyclic di-GMP Regulates TfoY in Vibrio cholerae To Control Motility by both Transcriptional and Posttranscriptional Mechanisms	2018	10.1128/jb.00578-17	Article	English	22	Pursley, BR; Maiden, MM; Hsieh, ML; Fernandez, NL; Severin, GB; Waters, CM
395	Candida albicans and Non-C. albicans Candida Species: Comparison of Biofilm Production and Metabolic Activity in Biofilms, and Putative Virulence Properties of Isolates from Hospital Environments and Infections	2013	10.1007/s11046-013-9638-z	Article	English	50	Ferreira, AV; Prado, CG; Carvalho, RR; Dias, KST; Dias, ALT
396	Peptidomimetics - An infinite reservoir of metal binding motifs in metabolically stable and biologically active molecules	2021	10.1016/j.jinorgbio.2021.111386	Article	English	3	Watly, J; Miller, A; Kozlowski, H; Rowinska-Zyrek, M
397	Novel magnetic nanoparticle-containing adhesive with greater dentin bond strength and antibacterial and remineralizing capabilities	2018	10.1016/j.dental.2018.06.001	Article	English	23	Li, YC; Hu, XY; Xia, Y; Ji, YD; Ruan, JP; Weir, MD; Lin, XY; Nie, ZH; Gu, N; Masri, R; Chang, XF; Xu, HHK
398	Brain response to injury and neurodegeneration - Endogenous neuroprotective signaling	2005	10.1196/annals.1344.011	Article; Proceedings Paper	English	98	Bazan, NG; Marcheselli, VL; Cole-Edwards, K
399	Role of n-3 Polyunsaturated Fatty Acids in Ameliorating the Obesity-Induced Metabolic Syndrome in Animal Models and Humans	2016	10.3390/ijms17101689	Review	English	60	Huang, CW; Chien, YS; Chen, YJ; Ajuwon, KM; Mersmann, HM; Ding, ST
400	Identification and molecular characterization of rice bran-specific lipases	2021	10.1007/s00299-021-02714-4	Article	English	3	Bansal, S; Sardar, S; Sinha, K; Bhunia, RK; Katoch, M; Sonah, H; Deshmukh, R; Ram, H
401	Microbial Lipopeptide-Producing Strains and Their Metabolic Roles under Anaerobic Conditions	2021	10.3390/microorganisms9102030	Review	English	5	Li, JY; Wang, L; Liu, YF; Zhou, L; Gang, HZ; Liu, JF; Yang, SZ; Mu, BZ
402	Communication and Computation by Bacteria Compartmentalized within Microemulsion Droplets	2014	10.1021/ja411132w	Article	English	60	Weitz, M; Muckl, A; Kapsner, K; Berg, R; Meyer, A; Simmel, FC
403	Halomonas sulfidaeris-dominated microbial community inhabits a 1.8km-deep subsurface Cambrian Sandstone reservoir	2014	10.1111/1462-2920.12325	Article	English	40	Dong, YR; Kumar, CG; Chia, N; Kim, PJ; Miller, PA; Price, ND; Cann, IKO; Flynn, TM; Sanford, RA; Krapac, IG; Locke, RA; Hong, PY; Tamaki, H; Liu, WT; Mackie, RI; Hernandez, AG; Wright, CL; Mikel, MA; Walker, JL; Sivaguru, M; Fried, G; Yannarell, AC; Fouke, BW
404	Hospital sink traps as a potential source of the emerging multidrug-resistant pathogen Cupriavidus pauculus: characterization and draft genome sequence of strain MF1	2022	10.1099/jmm.0.001501	Article	English	0	Butler, J; Kelly, SD; Muddiman, KJ; Besinis, A; Upton, M
405	Serogroup conversion of Vibrio cholerae in aquatic reservoirs	2007	10.1371/journal.ppat.0030081	Article	English	127	Blokesch, M; Schoolnik, GK
406	Role of gene E2f1 in susceptibility to bacterial adherence of oral streptococci to tooth surfaces in mice	2004	10.1111/j.1399-302x.2004.00151.x	Article	English	11	Matsumoto, N; Salam, MA; Watanabe, H; Amagasa, T; Senpuku, H
407	Chlorine sensitivity of environmental, distribution system and biofilm coliforms	1997	10.2166/wst.1997.0748	Article; Proceedings Paper	English	7	Sartory, DP; Holmes, P
408	Characterization of sulfate-reducing bacteria isolated from oil-field waters	1996	10.1139/m96-038	Article	English	43	TardyJacquenod, C; Caumette, P; Matheron, R; Lanau, C; Arnauld, O; Magot, M
409	Experimental and Natural Vertical Transmission of West Nile Virus by California Culex (Diptera: Culicidae) Mosquitoes	2013	10.1603/me12264	Article	English	43	Nelms, BM; Fechter-Leggett, E; Carroll, BD; Macedo, P; Kluh, S; Reisen, WK
410	Isoprenoid Metabolism and Engineering in Glandular Trichomes of Lamiaceae	2021	10.3389/fpls.2021.699157	Review	English	4	Mahmoud, SS; Maddock, S; Adal, AM
411	Adhesion, Biofilm Formation, and Genomic Features of Campylobacter jejuni Bf, an Atypical Strain Able to Grow under Aerobic Conditions	2016	10.3389/fmicb.2016.01002	Article	English	33	Bronnec, V; Turonova, H; Bouju, A; Cruveiller, S; Rodrigues, R; Demnerova, K; Tresse, O; Haddad, N; Zagorec, M
412	Detection and expression analysis of tet(B) in Streptococcus oralis	2019	10.1080/20002297.2019.1643204	Article	English	7	Arredondo, A; Alvarez, G; Nart, J; Mor, C; Blanc, V; Leon, R
413	Diverse, rare microbial taxa responded to the Deepwater Horizon deep-sea hydrocarbon plume	2016	10.1038/ismej.2015.121	Article	English	94	Kleindienst, S; Grim, S; Sogin, M; Bracco, A; Crespo-Medina, M; Joye, SB
414	The Diverse Roles of the Global Transcriptional Regulator PhoP in the Lifecycle of Yersinia pestis	2020	10.3390/pathogens9121039	Review	English	1	Fukuto, HS; Viboud, GI; Vadyvaloo, V
415	Subinhibitory Antibiotic Therapy Alters Recurrent Urinary Tract Infection Pathogenesis through Modulation of Bacterial Virulence and Host Immunity	2015	10.1128/mbio.00356-15	Article	English	49	Goneau, LW; Hannan, TJ; MacPhee, RA; Schwartz, DJ; Macklaim, JM; Gloor, GB; Razvi, H; Reid, G; Hultgren, SJ; Burton, JP
416	Liquid Crystalline Nanostructures as PEGylated Reservoirs of Omega-3 Polyunsaturated Fatty Acids: Structural Insights toward Delivery Formulations against Neurodegenerative Disorders	2018	10.1021/acsomega.7b01935	Article	English	46	Angelova, A; Drechsler, M; Garamus, VM; Angelov, B
417	Two regulatory factors of Vibrio cholerae activating the mannose- sensitive haemagglutinin pilus expression is important for biofilm formation and colonization in mice	2021	10.1099/mic.0.001098	Article	English	1	Shi, MT; Zheng, Y; Wang, XH; Wang, ZJ; Yang, MH
418	Natural oil slicks fuel surface water microbial activities in the northern Gulf of Mexico	2014	10.3389/fmicb.2014.00188	Article	English	21	Ziervogel, K; D'Souza, N; Sweet, J; Yan, BZ; Passow, U
419	Calibrating and Scaling Semi-empirical Foam Flow Models for the Assessment of Foam-Based EOR Processes (in Heterogeneous Reservoirs)	2020	10.1007/s11242-018-01223-5	Article	English	8	Gassara, O; Douarche, F; Braconnier, B; Bourbiaux, B
420	Mycobacterium haemophilum infections of zebrafish (Danio rerio) in research facilities	2007	10.1111/j.1574-6968.2007.00671.x	Article	English	70	Whipps, CM; Dougan, ST; Kent, ML
421	Human Serum Potentiates the Expression of Genes Associated with Antifungal Drug Resistance in C-albicans Biofilms on Central Venous Catheters	2015	10.1007/s11046-014-9848-z	Article	English	5	Samaranayake, LP; Anil, S; Hashem, M; Vellappally, S; Cheung, BPK
422	Accurate Diagnostics for Bovine tuberculosis Based on High-Throughput Sequencing	2012	10.1371/journal.pone.0050147	Article	English	12	Churbanov, A; Milligan, B
423	Type 1 Diabetes Is Associated With Enterovirus Infection in Gut Mucosa	2012	10.2337/db11-1157	Article	English	107	Oikarinen, M; Tauriainen, S; Oikarinen, S; Honkanen, T; Collin, P; Rantala, I; Maki, M; Kaukinen, K; Hyoty, H
424	Polyhydroxyalkanoates: Much More than Biodegradable Plastics	2015	10.1016/bs.aambs.2015.06.001	Review; Book Chapter	English	42	Lopez, NI; Pettinari, MJ; Nikel, PI; Mendez, BS
425	Thermoregulation of Biofilm Formation in Burkholderia pseudomallei Is Disrupted by Mutation of a Putative Diguanylate Cyclase	2017	10.1128/jb.00780-16	Article	English	18	Plumley, BA; Martin, KH; Borlee, GI; Marlenee, NL; Burtnick, MN; Brett, PJ; AuCoin, DP; Bowen, RA; Schweizer, HP; Borlee, BR
426	In-depth analyses of deep subsurface sediments using 454-pyrosequencing reveals a reservoir of buried fungal communities at record-breaking depths	2014	10.1111/1574-6941.12447	Article	English	31	Redou, V; Ciobanu, MC; Pachiadaki, MG; Edgcomb, V; Alain, K; Barbier, G; Burgaud, G
427	Virulence Factors of Clostridioides (Clostridium) difficile Linked to Recurrent Infections	2019	10.1155/2019/7127850	Review	English	6	Tijerina-Rodriguez, L; Villarreal-Trevino, L; Morfin-Otero, R; Camacho-Ortiz, A; Garza-Gonzalez, E
428	Antifungal and anti-biofilm activity of the first cryptic antimicrobial peptide from an archaeal protein against Candida spp. clinical isolates	2018	10.1038/s41598-018-35530-0	Article	English	39	Roscetto, E; Contursi, P; Vollaro, A; Fusco, S; Notomista, E; Catania, MR
429	Extracellular matrix mineralization and osteoblast gene expression by human adipose tissue-derived stromal cells	2001	10.1089/107632701753337681	Article	English	411	Halvorsen, YDC; Franklin, D; Bond, AL; Hitt, DC; Auchter, C; Boskey, AL; Paschalis, EP; Wilkison, WO; Gimble, JM
430	Mechanisms of Antibiotic Failure During Staphylococcus aureus Osteomyelitis	2021	10.3389/fimmu.2021.638085	Review	English	24	Gimza, BD; Cassat, JE
431	Desulfoglaeba alkanexedens gen. nov., sp nov., an n-alkane-degrading, sulfate-reducing bacterium	2006	10.1099/ijs.0.64398-0	Article	English	74	Davidova, IA; Duncan, KE; Choi, OK; Suflita, JM
432	Enterococcus faecalis with the gelatinase phenotype regulated by the fsr operon and with biofilm-forming capacity are common in the agricultural environment	2009	10.1111/j.1462-2920.2009.01881.x	Article	English	28	Macovei, L; Ghosh, A; Thomas, VC; Hancock, LE; Mahmood, S; Zurek, L
433	Regeneration of unconventional natural gas by methanogens co-existing with sulfate-reducing prokaryotes in deep shale wells in China	2020	10.1038/s41598-020-73010-6	Article	English	0	Zhang, YM; Yu, ZS; Zhang, YM; Zhang, HX
434	Improved rRNA extraction from biofouling and bioreactor samples	2022	10.1016/j.ibiod.2022.105481	Article	English	0	Nammoura Neto, GMN; Almeida, RNA; Schneider, RP
435	Integration of the metabolome and transcriptome reveals the metabolites and genes related to nutritional and medicinal value in Coriandrum sativum	2021	10.1016/s2095-3119(20)63358-5	Article	English	5	Tong, W; Feng, SY; Yang, QH; Bhetariya, PJ; Ke, G; Cui, CL; Jie, S; Ping, XR; Pei, QY; Tong, Y; Song, XM
436	The effects of platelet lysate patches on the activity of tendon-derived cells	2018	10.1016/j.actbio.2018.01.006	Article	English	18	Costa-Almeida, R; Franco, AR; Pesqueira, T; Oliveira, MB; Babo, PS; Leonor, IB; Mano, JF; Reis, RL; Gomes, ME
437	Fe-oxide grain coatings support bacterial Fe-reducing metabolisms in 1.7-2.0 km-deep subsurface quartz arenite sandstone reservoirs of the Illinois Basin (USA)	2014	10.3389/fmicb.2014.00511	Article	English	9	Dong, YR; Sanford, RA; Locke, RA; Cann, IK; Mackie, RI; Fouke, BW
438	Marine microbes rapidly adapt to consume ethane, propane, and butane within the dissolved hydrocarbon plume of a natural seep	2015	10.1002/2014jc010362	Article	English	8	Mendes, SD; Redmond, MC; Voigritter, K; Perez, C; Scarlett, R; Valentine, DL
439	Calibrating and interpreting implicit-texture models of foam flow through porous media of different permeabilities	2017	10.1016/j.petrol.2017.09.069	Article	English	15	Gassara, O; Douarche, F; Braconnier, B; Bourbiaux, B
440	Water uptake and distribution in germinating tobacco seeds investigated in vivo by nuclear magnetic resonance imaging	2005	10.1104/pp.105.061663	Article	English	141	Manz, B; Muller, K; Kucera, B; Volke, F; Leubner-Metzger, G
441	Shifts in the Microbial Community Composition of Gulf Coast Beaches Following Beach Oiling	2013	10.1371/journal.pone.0074265	Article	English	53	Newton, RJ; Huse, SM; Morrison, HG; Peake, CS; Sogin, ML; McLellan, SL
442	Multilocus Sequence Typing and DNA Similarity Analysis Implicates that a Borrelia valaisiana-related sp Isolated in Japan is Distinguishable from European B. valaisiana	2013	10.1292/jvms.13-0162	Article	English	7	Kawabata, H; Takano, A; Kadosaka, T; Fujita, H; Nitta, Y; Gokuden, M; Honda, T; Tomida, J; Kawamura, Y; Masuzawa, T; Ishiguro, F; Takada, N; Yano, Y; Andoh, M; Ando, S; Sato, K; Takahashi, H; Ohnishi, M
443	Protease inhibitor-containing regimens compared with nucleoside analogues alone in the suppression of persistent HIV-1 replication in lymphoid tissue	1999	10.1097/00002030-199901140-00001	Article	English	63	Ruiz, L; van Lunzen, J; Arno, A; Stellbrink, HJ; Schneider, C; Rull, M; Castella, E; Ojanguren, I; Richman, DD; Clotet, B; Tenner-Racz, K
444	Keeping Candida commensal: how lactobacilli antagonize pathogenicity of Candida albicans in an in vitro gut model	2019	10.1242/dmm.039719	Article	English	32	Graf, K; Last, A; Gratz, R; Allert, S; Linde, S; Westermann, M; Groger, M; Mosig, AS; Gresnigt, MS; Hube, B
445	Timing of biogenic gas formation in the eastern Qaidam Basin, NW China	2013	10.1016/j.chemgeo.2013.06.001	Article	English	19	Zhang, SC; Shuai, YH; Huang, L; Wang, LQ; Su, J; Huang, HP; Ma, DD; Li, MW
446	Investigating the mechanism of microbiologically influenced corrosion of carbon steel using X-ray micro-computed tomography	2021	10.1007/s10853-021-06112-9	Article	English	2	Albahri, MB; Barifcani, A; Iglauer, S; Lebedev, M; O'Neil, C; Salgar-Chaparro, SJ; Machuca, LL
447	Phylogeny and physiology of candidate phylum 'Atribacteria' (OP9/JS1) inferred from cultivation-independent genomics	2016	10.1038/ismej.2015.97	Article	English	117	Nobu, MK; Dodsworth, JA; Murugapiran, SK; Rinke, C; Gies, EA; Webster, G; Schwientek, P; Kille, P; Parkes, RJ; Sass, H; Jorgensen, BB; Weightman, AJ; Liu, WT; Hallam, SJ; Tsiamis, G; Woyke, T; Hedlund, BP
448	Streptococcus pyogenes adhesion and colonization	2016	10.1002/1873-3468.12254	Review	English	62	Brouwer, S; Barnett, TC; Rivera-Hernandez, T; Rohde, M; Walker, MJ
449	Genetic diversity between and within the arenavirus species indigenous to western Venezuela	2008	10.1016/j.virol.2008.05.014	Article	English	21	Fulhorst, CF; Cajimat, MNB; Milazzo, ML; Paredes, H; de Manzione, NMC; Salas, RA; Rollin, PE; Ksiazek, TG
450	Pyrene-Degrading Fungus Ceriporia lacerata RF-7 from Contaminated Soil in Iraq	2022	10.1080/10406638.2020.1713183	Article	English	26	Al-Hawash, AB; Al-Qurnawi, WS; Abbood, HA; Hillo, NA; Ghalib, HB; Zhang, XY; Ma, FY
451	Transcriptomic analyses reveal complex and interconnected sucrose signaling cascades in developing seeds of castor bean	2018	10.1016/j.jplph.2017.11.012	Article	English	5	Wang, B; Zhang, Y; Haque, ME; Xu, W; Li, F; Liu, AZ
452	Seed-Specific Expression of AtLEC1 Increased Oil Content and Altered Fatty Acid Composition in Seeds of Peanut (Arachis hypogaea L.)	2018	10.3389/fpls.2018.00260	Article	English	21	Tang, GY; Xu, PL; Ma, WH; Wang, F; Liu, ZJ; Wan, SB; Shan, L
453	Modelling density of pure and binary mixtures of normal alkanes: Comparison of hybrid soft computing techniques, gene expression programming, and equations of state	2022	10.1016/j.petrol.2021.109737	Article	English	1	Shahabi-Ghahfarokhy, A; Nakhaei-Kohani, R; Amar, MN; Hemmati-Sarapardeh, A
454	Regulation of Mycolactone, the Mycobacterium ulcerans Toxin, Depends on Nutrient Source	2013	10.1371/journal.pntd.0002502	Article	English	16	Deshayes, C; Angala, SK; Marion, E; Brandli, I; Babonneau, J; Preisser, L; Eyangoh, S; Delneste, Y; Legras, P; De Chastellier, C; Stinear, TP; Jackson, M; Marsollier, L
455	Survival of Campylobacter jejuni in co-culture with Acanthamoeba castellanii: role of amoeba-mediated depletion of dissolved oxygen	2012	10.1111/j.1462-2920.2011.02655.x	Article	English	32	Bui, XT; Winding, A; Qvortrup, K; Wolff, A; Bang, DD; Creuzenet, C
456	Effects of dietary lipid sources on hepatic nutritive contents, fatty acid composition and proteome of Nile tilapia (Oreochromis niloticus)	2019	10.1016/j.jprot.2018.09.003	Article	English	12	Boonanuntanasarn, S; Nakharuthai, C; Schrama, D; Duangkaew, R; Rodrigues, PM
457	Synergistic Effect of Abietic Acid with Oxacillin against Methicillin-Resistant Staphylococcus pseudintermedius	2021	10.3390/antibiotics10010080	Article	English	8	Buommino, E; Vollaro, A; Nocera, FP; Lembo, F; DellaGreca, M; De Martino, L; Catania, MR
458	Porphyromonas gingivalis HmuY and Streptococcus gordonii GAPDH-Novel Heme Acquisition Strategy in the Oral Microbiome	2020	10.3390/ijms21114150	Article	English	3	Slezak, P; Smiga, M; Smalley, JW; Sieminska, K; Olczak, T
459	Novel machine learning approach for classification of high-dimensional microarray data	2019	10.1007/s00500-019-03879-7	Article	English	27	Musheer, RA; Verma, CK; Srivastava, N
460	Cyclic di-GMP Increases Catalase Production and Hydrogen Peroxide Tolerance in Vibrio cholerae	2019	10.1128/aem.01043-19	Article	English	9	Fernandez, NL; Waters, CM
461	Permanent draft genome sequence of Dethiosulfovibrio peptidovorans type strain (SEBR 4207(T))	2010	10.4056/sigs.1092865	Article	English	7	LaButti, K; Mayilraj, S; Clum, A; Lucas, S; Del Rio, TG; Nolan, M; Tice, H; Cheng, JF; Pitluck, S; Liolios, K; Ivanova, N; Mavromatis, K; Mikhailova, N; Pati, A; Goodwin, L; Chen, A; Palaniappan, K; Land, M; Hauser, L; Chang, YJ; Jeffries, CD; Rohde, M; Spring, S; Goker, M; Woyke, T; Bristow, J; Eisen, JA; Markowitz, V; Hugenholtz, P; Kyrpides, NC; Klenk, HP; Lapidus, A
462	Application of Denaturing High-Performance Liquid Chromatography for Monitoring Sulfate-Reducing Bacteria in Oil Fields	2013	10.1128/aem.01015-13	Article	English	9	Priha, O; Nyyssonen, M; Bomberg, M; Laitila, A; Simell, J; Kapanen, A; Juvonen, R
463	Reliable inkjet printing of chondrocytes and MSCs using reservoir agitation	2020	10.1088/1758-5090/aba2f8	Article	English	4	Dudman, JPR; Ferreira, AM; Gentile, P; Wang, X; Ribeiro, RD; Benning, M; Dalgarno, KW
464	An integrated device for monitoring time-dependent in vitro expression from single genes in picolitre droplets	2008	10.1002/cbic.200700536	Article	English	146	Courtois, F; Olguin, LF; Whyte, G; Bratton, D; Huck, WTS; Abell, C; Hollfelder, F
465	Natural occurrence of cucumber mosaic virus in Ogeira (Eleutheranthera ruderalis) in Nigeria	2019	10.1080/03235408.2019.1585407	Article	English	2	Arogundade, O; Oresanya, A; Matthew, JO; Kareem, KT; Onyeanusi, H
466	The microbial community of a biofilm lining the wall of a pristine cave in Western New Guinea	2020	10.1016/j.micres.2020.126584	Article	English	10	Turrini, P; Tescari, M; Visaggio, D; Pirolo, M; Lugli, GA; Ventura, M; Frangipani, E; Visca, P
467	Detection of Lassa virus in wild rodent feces: Implications for Lassa fever burden within households in the endemic region of Faranah, Guinea	2021	10.1016/j.onehlt.2021.100317	Article	English	3	Wood, R; Bangura, U; Marien, J; Douno, M; Fichet-Calvet, E
468	Methanothermococcus okinawensis sp nov., a thermophilic, methane-producing archaeon isolated from a Western Pacific deep-sea hydrothermal vent system	2002	10.1099/ijs.0.02106-0	Article	English	93	Takai, K; Inoue, A; Horikoshi, K
469	ARHODOMONAS-AQUAEOLEI GEN-NOV, SP-NOV, AN AEROBIC, HALOPHILIC BACTERIUM ISOLATED FROM A SUBTERRANEAN BRINE	1993	10.1099/00207713-43-3-514	Article	English	38	ADKINS, JP; MADIGAN, MT; MANDELCO, L; WOESE, CR; TANNER, RS
470	Accessing the black box of microbial diversity and ecophysiology: Recent advances through polyphasic experiments	2006	10.1080/10934520600614546	Article	English	30	Collins, G; Kavanagh, S; McHugh, S; Connaughton, S; Kearney, A; Rice, O; Carrigg, C; Scully, C; Bhreathnach, N; Mahony, T; Madden, P; Enright, AM; O'Flaherty, V
471	Engineering Native and Synthetic Pathways in Pseudomonas putida for the Production of Tailored Polyhydroxyalkanoates	2021	10.1002/biot.202000165	Review	English	25	Mezzina, MP; Manoli, MT; Prieto, MA; Nikel, PI
472	The Secret Life of the Anthrax Agent Bacillus anthracis: Bacteriophage-Mediated Ecological Adaptations	2009	10.1371/journal.pone.0006532	Article	English	115	Schuch, R; Fischetti, VA
473	SURVIVAL MECHANISMS OF HYDROGEN SULFIDE-PRODUCING BACTERIA ISOLATED FROM EXTREME ENVIRONMENTS AND THEIR ROLE IN CORROSION	1994	10.1016/0964-8305(94)90090-6	Article; Proceedings Paper	English	11	LAPPINSCOTT, HM; BASS, CJ; MCALPINE, K; SANDERS, PF
474	Candida digboiensis sp nov., a novel anamorphic yeast species from an acidic tar sludge-contaminated oilfield	2005	10.1099/ijs.0.63313-0	Article	English	13	Prasad, GS; Mayilraj, S; Sood, N; Singh, V; Biswas, K; Lal, B
475	Sustained elevated serum somatotropin concentrations in Holstein steers following subcutaneous delivery of a growth hormone releasing factor analog dispersed in water, oil or microspheres	1997	10.1016/s0168-3659(96)01623-9	Article	English	6	Foster, TP; Moseley, WM; Caputo, JF; Alaniz, GR; Leatherman, MW; Yu, X; Claflin, WH; Reeves, DR; Cleary, DL; Zantello, MR; Krabill, LF; Wiest, JR
476	Taxonomic and functional metagenomic profiling of gastrointestinal tract microbiome of the farmed adult turbot (Scophthalmus maximus)	2013	10.1111/1574-6941.12174	Article	English	113	Xing, MX; Hou, ZH; Yuan, JB; Liu, Y; Qu, YM; Liu, B
477	Phenotypic diversity of Flo protein family-mediated adhesion in Saccharomyces cerevisiae	2009	10.1111/j.1567-1364.2008.00462.x	Article	English	103	Van Mulders, SE; Christianen, E; Saerens, SMG; Daenen, L; Verbelen, PJ; Willaert, R; Verstrepen, KJ; Delvaux, FR
478	Microbial engineering to produce fatty alcohols and alkanes	2021	10.1093/jimb/kuab011	Review	English	6	Sharma, A; Yazdani, SS
479	New gas material balance to quantify biogenic gas generation rates from shallow organic-matter-rich shales	2013	10.1016/j.fuel.2012.06.054	Article	English	14	Cokar, M; Ford, B; Kallos, MS; Gates, ID
480	Methoxyeugenol regulates the p53/p21 pathway and suppresses human endometrial cancer cell proliferation	2021	10.1016/j.jep.2020.113645	Article	English	8	Costa, BP; Nassr, MT; Diz, FM; Fernandes, KHA; Antunes, GL; Grun, LK; Barbe-Tuana, FM; Nunes, FB; Branchini, G; de Oliveira, JR
481	In-Feed Supplementation of trans-Cinnamaldehyde Reduces Layer-Chicken Egg-Borne Transmission of Salmonella enterica Serovar Enteritidis	2015	10.1128/aem.03809-14	Article	English	27	Upadhyaya, I; Upadhyay, A; Kollanoor-Johny, A; Mooyottu, S; Baskaran, SA; Yin, HB; Schreiber, DT; Khan, MI; Darre, MJ; Curtis, PA; Venkitanarayanan, K
482	A Quorum Sensing-Regulated Protein Binds Cell Wall Components and Enhances Lysozyme Resistance in Streptococcus pyogenes	2018	10.1128/jb.00701-17	Article	English	18	Gogos, A; Jimenez, JC; Chang, JC; Wilkening, RV; Federle, MJ
483	Microglial activation varies in different models of Creutzfeldt-Jakob disease	1999	10.1128/jvi.73.6.5089-5097.1999	Article	English	76	Baker, CA; Lu, ZY; Zaitsev, I; Manuelidis, L
484	Polyelectrolyte Multilayers Fabricated from Antifungal beta-Peptides: Design of Surfaces that Exhibit Antifungal Activity Against Candida albicans	2010	10.1021/bm100424s	Article	English	62	Karlsson, AJ; Flessner, RM; Gellman, SH; Lynn, DM; Palecek, SP
485	Pulsed blooms and persistent oil-degrading bacterial populations in the water column during and after the Deepwater Horizon blowout	2016	10.1016/j.dsr2.2014.01.014	Article	English	72	Yang, TT; Nigro, LM; Gutierrez, T; D'Ambrosio, L; Joye, SB; Highsmith, R; Teske, A
486	A Constant Flux of Diverse Thermophilic Bacteria into the Cold Arctic Seabed	2009	10.1126/science.1174012	Article	English	147	Hubert, C; Loy, A; Nickel, M; Arnosti, C; Baranyi, C; Bruchert, V; Ferdelman, T; Finster, K; Christensen, FM; de Rezende, JR; Vandieken, V; Jorgensen, BB
487	A Post-Genomic View of the Ecophysiology, Catabolism and Biotechnological Relevance of Sulphate-Reducing Prokaryotes	2015	10.1016/bs.ampbs.2015.05.002	Review; Book Chapter	English	175	Rabus, R; Venceslau, SS; Wohlbrand, L; Voordouw, G; Wall, JD; Pereira, IAC
488	Expression and localization of ferritin mRNA in ameloblasts of rat incisor	1998	10.1016/s0003-9969(98)00014-4	Article	English	11	Miyazaki, Y; Sakai, H; Shibata, Y; Shibata, M; Mataki, S; Kato, Y
489	A Natural Host and Diversity of Pepper Vein Yellows Virus in Japan	2017	10.6090/jarq.51.59	Article	English	1	Murakami, R; Kawano, S
490	Silver Nanoparticles and their Role in Gene Expression of Motility Gene motB and Repression of AI-2-Controlled Gene	2020	10.21123/bsj.2020.17.3(suppl.).0916	Article	English	0	Mahmood, BS
491	An entropy-optimized multilocus approach for characterizing the strains of Anaplasma phagocytophilum infecting horses in the Czech Republic	2009	10.1099/jmm.0.007831-0	Article	English	13	Zeman, P; Jahn, P
492	Complete genome sequence of Denitrovibrio acetiphilus type strain (N2460(T))	2010	10.4056/sigs.892105	Article	English	12	Kiss, H; Lang, E; Lapidus, A; Copeland, A; Nolan, M; Del Rio, TG; Chen, F; Lucas, S; Tice, H; Cheng, JF; Han, C; Goodwin, L; Pitluck, S; Liolios, K; Pati, A; Ivanova, N; Mavromatis, K; Chen, A; Palaniappan, K; Land, M; Hauser, L; Chang, YJ; Jeffries, CD; Detter, JC; Brettin, T; Spring, S; Rohde, M; Goker, M; Woyke, T; Bristow, J; Eisen, JA; Markowitz, V; Hugenholtz, P; Kyrpides, NC; Klenk, HP
493	The bacterial community of Quesnel Lake sediments impacted by a catastrophic mine tailings spill differ in composition from those at undisturbed locations - two years post-spill	2019	10.1038/s41598-019-38909-9	Article	English	14	Hatam, I; Petticrew, EL; French, TD; Owens, PN; Laval, B; Baldwin, SA
494	Effect of fish oil supplementation on fatty acid status, coordination, and fine motor skills in children with phenylketonuria	2007	10.1016/j.jpeds.2006.12.011	Article	English	68	Beblo, S; Reinhardt, H; Demmelmair, H; Muntau, AC; Koletzko, B
495	Automated MEMS-based Drosophila embryo injection system for high-throughput RNAi screens	2006	10.1039/b600238b	Article	English	56	Zappe, S; Fish, M; Scott, MP; Solgaard, O
496	Metagenomic and geochemical characterization of pockmarked sediments overlaying the Troll petroleum reservoir in the North Sea	2012	10.1186/1471-2180-12-203	Article	English	19	Havelsrud, OE; Haverkamp, THA; Kristensen, T; Jakobsen, KS; Rike, AG
497	Grease Waste as a Reservoir of Lipase-Producing Yeast and Description of Limtongella siamensis gen. nov., sp. nov	2020	10.3390/microorganisms8010027	Article	English	6	Sakpuntoon, V; Angchuan, J; Boontham, W; Khunnamwong, P; Boonmak, C; Srisuk, N
498	Mitigating Sulfidogenesis With Simultaneous Perchlorate and Nitrate Treatments	2018	10.3389/fmicb.2018.02305	Article	English	3	Engelbrektson, A; Briseno, V; Liu, Y; Figueroa, I; Yee, M; Shao, GL; Carlson, H; Coates, JD
499	Transport and transcriptional regulation of oil production in plants	2017	10.1080/07388551.2016.1212185	Review	English	37	Manan, S; Chen, BB; She, GB; Wan, XC; Zhao, J
500	Shift of Propionate-Oxidizing Bacteria with HRT Decrease in an UASB Reactor Containing Propionate as a Sole Carbon Source	2015	10.1007/s12010-014-1265-8	Article	English	15	Ban, QY; Zhang, LG; Li, JZ
501	Gene structure, expression pattern and interaction of Nuclear Factor-Y family in castor bean (Ricinus communis)	2018	10.1007/s00425-017-2809-2	Article	English	25	Wang, Y; Xu, W; Chen, ZX; Han, B; Haque, ME; Liu, AZ
502	Proteomic analyses of ethanol tolerance in Lactobacillus buchneri NRRL B-30929	2014	10.1002/pmic.201300538	Article	English	11	Liu, SQ
503	Microbial Persistence and the Road to Drug Resistance	2013	10.1016/j.chom.2013.05.009	Review	English	280	Cohen, NR; Lobritz, MA; Collins, JJ
504	Cyclic Di-GMP and VpsR Induce the Expression of Type II Secretion in Vibrio cholerae	2017	10.1128/jb.00106-17	Article	English	14	Sloup, RE; Konal, AE; Severin, GB; Korir, ML; Bagdasarian, MM; Bagdasarian, M; Waters, CM
505	Acetate and propionate in landfill leachates: Implications for the recognition of microbiological influences on the composition of waters in sedimentary systems	1997	10.1130/0091-7613(1997)025<0279:aapill>2.3.co;2	Article	English	12	Manning, DAC
506	Bacterial pigments: A colorful palette reservoir for biotechnological applications	2022	10.1002/bab.2170	Review	English	4	Orlandi, VT; Martegani, E; Giaroni, C; Baj, A; Bolognese, F
507	Single-cell and metagenomic analyses indicate a fermentative and saccharolytic lifestyle for members of the OP9 lineage	2013	10.1038/ncomms2884	Article	English	133	Dodsworth, JA; Blainey, PC; Murugapiran, SK; Swingley, WD; Ross, CA; Tringe, SG; Chain, PSG; Scholz, MB; Lo, CC; Raymond, J; Quake, SR; Hedlund, BP
508	Evidence of influenza A virus RNA in Siberian lake ice	2006	10.1128/jvi.00986-06	Article	English	49	Zhang, G; Shoham, D; Gilichinsky, D; Davydov, S; Castello, JD; Rogers, SO
509	Stable isotope ratios as a biomarker on mars	2008	10.1007/s11214-007-9268-1	Review	English	17	van Zuilen, M
510	Identification of target genes and processes involved in erucic acid accumulation during seed development in the biodiesel feedstock Pennycress (Thlaspi arvense L.)	2017	10.1016/j.jplph.2016.10.011	Article	English	18	Claver, A; Rey, R; Lopez, MV; Picorel, R; Alfonso, M
511	Modification of rock/fluid and fluid/fluid interfaces during MEOR processes, using two biosurfactant producing strains of Bacillus stearothermophilus SUCPM#14 and Enterobacter cloacae: A mechanistic study	2014	10.1016/j.colsurfb.2013.12.002	Article	English	18	Sarafzadeh, P; Hezaye, AZ; Mohammadi, S; Niazi, A; Ayatollahi, S
512	A Microbial Exopolysaccharide Produced by Sphingomonas Species for Enhanced Heavy Oil Recovery at High Temperature and High Salinity	2017	10.1021/acs.energyfuels.6b02923	Article	English	40	Li, YJ; Xu, L; Gong, HJ; Ding, BX; Dong, MZ; Li, YC
513	Filamentation by Escherichia coli subverts innate defenses during urinary tract infection	2006	10.1073/pnas.0606329104	Article	English	219	Justice, SS; Hunstad, DA; Seed, PC; Hultgren, SJ
514	Remarkable rutin-rich Hypericum capitatum extract exhibits anti-inflammatory effects on turpentine oil-induced inflammation in rats	2019	10.1186/s12906-019-2680-8	Article	English	8	Farcas, AD; Mot, AC; Zagrean-Tuza, C; Ticolea, M; Sevastre, B; Kulak, M; Silaghi-Dumitrescu, R; Parvu, A
515	HIV-1 Can Persist in Aged Memory CD4(+) T Lymphocytes With Minimal Signs of Evolution After 8.3 Years of Effective Highly Active Antiretroviral Therapy	2009	10.1097/qai.0b013e318197eb04	Article; Proceedings Paper	English	25	Nottet, HSLM; van Dijk, SJ; Fanoy, EB; Goedegebuure, IW; de Jong, D; Vrisekoop, N; van Baarle, D; Boltz, V; Palmer, S; Borleffs, JCC; Boucher, CAB
516	Molecular identification and genetic diversity of Bartonella spp. in 24 bat species from Thailand	2022	10.1111/tbed.14389	Article	English	2	Poofery, J; Narapakdeesakul, D; Riana, E; Arnuphapprasert, A; Nugraheni, YR; Ngamprasertwong, T; Wangthongchaicharoen, M; Soisook, P; Bhodhibundit, P; Kaewthamasorn, M
517	Molecular determinants of surface colonisation in diarrhoeagenic Escherichia coli (DEC): from bacterial adhesion to biofilm formation	2020	10.1093/femsre/fuaa008	Review	English	21	Ageorges, V; Monteiro, R; Leroy, S; Burgess, CM; Pizza, M; Chaucheyras-durand, F; Desvaux, M
518	Characterization of Swedish Campylobacter coil clade 2 and clade 3 water isolates	2018	10.1002/mbo3.583	Article	English	7	Nilsson, A; Skarp, A; Johansson, C; Kaden, R; Engstrand, L; Rautelin, H
519	Evolutionary-based approaches for determining the deviatoric stress of calcareous sands	2013	10.1016/j.cageo.2012.07.006	Article	English	24	Shahnazari, H; Tutunchian, MA; Rezvani, R; Valizadeh, F
520	Osteogenic properties of late adherent subpopulations of human bone marrow stromal cells	2009	10.1007/s00418-009-0633-x	Article	English	19	Leonardi, E; Ciapetti, G; Baglio, SR; Devescovi, V; Baldini, N; Granchi, D
521	Amino acid synthesis in Europa's subsurface environment	2008	10.1017/s1473550408004114	Article	English	5	Abbas, SH; Schulze-Makuch, D
522	Genomic characterization of carbapenem-resistant Shewanella algae isolated from Asian hard clam (Meretrix lusoria)	2019	10.1016/j.aquaculture.2018.10.028	Article	English	8	Lee, YH; Tung, KC; Cheng, JF; Wu, ZY; Chen, SY; Hong, YK; Huang, YT; Liu, PY
523	Digital PCR on a SlipChip	2010	10.1039/c004521g	Article	English	209	Shen, F; Du, WB; Kreutz, JE; Fok, A; Ismagilov, RF
524	Rabies re-examined	2002	10.1016/s1473-3099(02)00287-6	Review	English	376	Rupprecht, CE; Hanlon, CA; Hemachudha, T
525	Effect of temperature on production of CH4 and CO2 from peat in a natural and flooded boreal forest wetland	1998	10.1023/a:1005416903368	Article	English	42	McKenzie, C; Schiff, S; Aravena, R; Kelly, C; Louis, VS
526	Integration of stable carbon isotope, microbial community, dissolved hydrogen gas, and H-2(H2O) tracer data to assess bioaugmentation for chlorinated ethene degradation in fractured rocks	2014	10.1016/j.jconhyd.2013.10.004	Article	English	20	Revesz, KM; Lollar, BS; Kirshtein, JD; Tiedeman, CR; Imbrigiotta, TE; Goode, DJ; Shapiro, AM; Voytek, MA; Lacombe, PJ; Busenberg, E
527	Carbonate Precipitation through Microbial Activities in Natural environment, and Their Potential in Biotechnology: A Review	2016	10.3389/fbioe.2016.00004	Review	English	301	Zhu, TT; Dittrich, M
528	Genome sequence of the Thermotoga thermarum type strain (LA3(T)) from an African solfataric spring	2014	10.4056/sigs.3016383	Article	English	4	Goker, M; Spring, S; Scheuner, C; Anderson, I; Zeytun, A; Nolan, M; Lucas, S; Tice, H; Del Rio, TG; Cheng, JF; Han, C; Tapia, R; Goodwin, LA; Pitluck, S; Liolios, K; Mavromatis, K; Pagani, I; Ivanova, N; Mikhailova, N; Pati, A; Chen, A; Palaniappan, K; Land, M; Hauser, L; Chang, YJ; Jeffries, CD; Rohde, M; Detter, JC; Woyke, T; Bristow, J; Eisen, JA; Markowitz, V; Hugenholtz, P; Kyrpides, NC; Kle…
529	Mesotoga prima gen. nov., sp nov., the first described mesophilic species of the Thermotogales	2012	10.1007/s00792-012-0437-0	Article	English	77	Nesbo, CL; Bradnan, DM; Adebusuyi, A; Dlutek, M; Petrus, AK; Foght, J; Doolittle, WF; Noll, KM
530	Extensive Horizontal Gene Transfer within and between Species of Coagulase-Negative Staphylococcus	2021	10.1093/gbe/evab206	Article	English	3	Smith, JT; Andam, CP
531	Microbial enhanced oil recovery-a modeling study of the potential of spore-forming bacteria	2016	10.1007/s10596-015-9526-3	Article; Proceedings Paper	English	14	Nielsen, SM; Nesterov, I; Shapiro, AA
532	Maternal control of seed weight in rapeseed (Brassica napus L.): the causal link between the size of pod (mother, source) and seed (offspring, sink)	2019	10.1111/pbi.13011	Article	English	22	Li, N; Song, OJ; Peng, W; Zhan, JP; Shi, JQ; Wang, XF; Liu, GH; Wang, HZ
533	Vendian Hydrogeochemistry of the Siberian Platform	2021	10.2113/rgg20194074	Article	English	1	Novikov, DA; Chernykh, AV; Konstantinova, LN; Dultsev, FF; Yurchik, II
534	Nasogastric enteral feeding tubes modulate preterm colonization in early life	2022	10.1038/s41390-021-01852-5	Article	English	1	Perez, JJ; Moreno-Sanz, B; Navarro, IC; Rubio, CA; Jimenez, BC; Palomino, EE; Alvarez, LF; Rodriguez, JM; Martin, BO; de Pipaon, MS
535	Tree Size Drives Diversity and Community Structure of Microbial Communities on the Bark of Beech (Fagus sylvatica)	2022	10.3389/ffgc.2022.858382	Article	English	0	Dreyling, L; Schmitt, I; Dal Grande, F
536	Hydrocarbonoclastic Alcanivorax Isolates Exhibit Different Physiological and Expression Responses to n-dodecane	2016	10.3389/fmicb.2016.02056	Article	English	20	Barbato, M; Scoma, A; Mapelli, F; De Smet, R; Banat, IM; Daffonchio, D; Boon, N; Borin, S
537	An insight into fruit aroma volatilome during postharvest maturation in two popular Musa cultivars of tropics	2022	10.1002/jsfa.11779	Article	English	1	Mukherjee, S; Pal, A; Mitra, A
538	Evaluation of organic matter removal and electricity generation by using integrated microbial fuel cells for wastewater treatment	2016	10.1080/09593330.2015.1066874	Article	English	7	Yamashita, T; Ishida, M; Ogino, A; Yokoyama, H
539	The Fallopian tubes in domestic mammals: how vital is their physiological activity?	2005	10.1051/rnd:2005020	Article; Proceedings Paper	English	79	Hunter, RHF
540	Prostratin: An Overview	2015	10.2174/1389557515666150511154108	Review	English	26	Miana, GA; Riaz, M; Shahzad-ul-Hussan, S; Paracha, RZ; Paracha, UZ
541	Viral diagnosis in cultivars of Ipomoea batatas (L.) Lam.	2021	10.15835/nbha49112222	Article	English	0	Andrade, CG; da Silva, EM; Ragonezi, C; De Carvalho, MAAP
542	Cross-contamination potential of saliva ejectors used in dentistry	1998	10.1016/s0195-6701(98)90308-5	Article	English	17	Barbeau, J; ten Bokum, L; Gauthier, C; Prevost, AP
543	Molecular Detection of Cucumber Mosaic Virus and Tobacco Mosaic Virus Infecting African Nightshades (Solanum scabrum Miller)	2020	10.1155/2020/8864499	Article	English	1	Kimaru, SL; Kilalo, DC; Muiru, WM; Kimenju, JW; Thuku, CR
544	Erucic acid, a component of Lorenzo's oil and PPAR-delta ligand modifies C6 glioma growth and toxicity of doxorubicin. Experimental data and a comprehensive literature analysis	2018	10.1016/j.cbi.2018.08.024	Article	English	11	Altinoz, MA; Bilir, A; Elmaci, I
545	Ecotoxicity assessment using ciliate cells in millifluidic droplets	2016	10.1063/1.4944869	Article	English	8	Illing, R; Burkart, C; Pfitzner, D; Jungmann, D; Baraban, L; Cuniberti, G
546	Identification of key genes and molecular mechanisms associated with low egg production of broiler breeder hens in ad libitum	2019	10.1186/s12864-019-5801-3	Article	English	10	Wei, ZH; Li, PC; Huang, SJ; Lkhagvagarav, P; Zhu, MQ; Liang, CY; Jia, CL
547	Bioenergetics of sulphate-reducing bacteria in relation to their environmental impact	1998	10.1023/a:1008362304234	Article; Proceedings Paper	English	51	Hamilton, WA
548	Constraining the timing of microbial methane generation in an organic-rich shale using noble gases, Illinois Basin, USA	2011	10.1016/j.chemgeo.2011.04.019	Article	English	46	Schlegel, ME; Zhou, Z; McIntosh, JC; Ballentine, CJ; Person, MA
549	Molecular interaction between methicillin-resistant Staphylococcus aureus (MRSA) and chicken breast reveals enhancement of pathogenesis and toxicity for food-borne outbreak	2021	10.1016/j.fm.2020.103602	Article	English	6	Chung, HY; Kim, YT; Kwon, JG; Im, HH; Ko, D; Lee, JH; Choi, SH
550	Longitudinal characterization of antimicrobial resistance genes in feces shed from cattle fed different subtherapeutic antibiotics	2011	10.1186/1471-2180-11-19	Article	English	54	Alexander, TW; Yanke, JL; Reuter, T; Topp, E; Read, RR; Selinger, BL; McAllister, TA
551	Transmission of Vibrio cholerae Is Antagonized by Lytic Phage and Entry into the Aquatic Environment	2008	10.1371/journal.ppat.1000187	Article	English	63	Nelson, EJ; Chowdhury, A; Flynn, J; Schild, S; Bourassa, L; Shao, Y; LaRocque, RC; Calderwood, SB; Qadri, F; Camilli, A
552	Unraveling How Candida albicans Forms Sexual Biofilms	2020	10.3390/jof6010014	Review	English	7	Perry, AM; Hernday, AD; Nobile, CJ
553	Essential oil of Foeniculum vulgare subsp. piperitum fruits exerts an anti-tumor effect in triple-negative breast cancer cells	2022	10.3892/mmr.2022.12759	Article	English	4	Lauricella, M; Maggio, A; Badalamenti, N; Bruno, M; D'Angelo, GD; D'Anneo, A
554	Pharmaceuticals in the environment: Biodegradation and effects on natural microbial communities. A review	2015	10.1016/j.jpba.2014.11.040	Review	English	254	Caracciolo, AB; Topp, E; Grenni, P
555	Natural Guided Genome Engineering Reveals Transcriptional Regulators Controlling Quorum-Sensing Signal Degradation	2015	10.1371/journal.pone.0141718	Article	English	4	El Sahili, A; Kwasiborski, A; Mothe, N; Velours, C; Legrand, P; Morera, S; Faure, D
556	The thermodynamic landscape of methanogenic PAH degradation	2009	10.1111/j.1751-7915.2009.00096.x	Article	English	36	Dolfing, J; Xu, AP; Gray, ND; Larter, SR; Head, IM
557	Mitigation of microbial biodeterioration and acid corrosion of pipework steel using Citrus reticulata peels extract mediated copper nanoparticles composite	2020	10.1016/j.ibiod.2020.104935	Article	English	19	Ituen, E; Ekemini, E; Lin, YH; Li, RY; Singh, A
558	Enhanced microbial coalbed methane generation: A review of research, commercial activity, and remaining challenges	2015	10.1016/j.coal.2015.04.013	Review	English	168	Ritter, D; Vinson, D; Barnhart, E; Akob, DM; Fields, MW; Cunningham, A; Orem, W; McIntosh, JC
559	Impacts of produced water origin on bacterial community structures of activated sludge	2015	10.1016/j.jes.2015.04.030	Article	English	8	Wang, ZY; Pan, F; Hesham, A; Gao, YX; Zhang, Y; Yang, M
560	Modelling the Shimokita deep coalbed biosphere over deep geological time: Starvation, stimulation, material balance and population models	2020	10.1111/bre.12399	Article	English	1	Bowden, SA; Mohamed, AY; Edilbi, ANF; Lin, YS; Morono, Y; Hinrichs, KU; Inagaki, F
561	Nutrients, temperature, and oxygen mediate microbial antibiotic resistance in sea bass (Lateolabrax maculatus) ponds	2022	10.1016/j.scitotenv.2022.153120	Article	English	2	Deng, YQ; Mao, C; Lin, ZY; Su, WX; Cheng, CH; Li, Y; Gu, QH; Gao, R; Su, YL; Feng, J
562	Genome of a Member of the Candidate Archaeal Phylum Verstraetearchaeota from a Subsurface Thermal Aquifer Revealed Pathways of Methyl-Reducing Methanogenesis and Fermentative Metabolism	2019	10.1134/s0026261719030068	Article	English	0	Kadnikov, VV; Mardanov, AV; Beletsky, AV; Frank, YA; Karnachuk, OV; Ravin, NV
563	An evaluation of the importance of sulfate reduction and temperature to P fluxes from aerobic-surfaced, lacustrine sediments	2002	10.1023/a:1020291130333	Article	English	14	Suplee, MW; Cotner, JB
564	Evolution towards Virulence in a Burkholderia Two-Component System	2021	10.1128/mbio.01823-21	Article	English	0	Schaefers, MM; Wang, BX; Boisvert, NM; Martini, SJ; Bonney, SL; Marshall, CW; Laub, MT; Cooper, VS; Priebe, GP
565	Human Leptospirosis Caused by a New, Antigenically Unique Leptospira Associated with a Rattus Species Reservoir in the Peruvian Amazon	2008	10.1371/journal.pntd.0000213	Article	English	99	Matthias, MA; Ricaldi, JN; Cespedes, M; Diaz, MM; Galloway, RL; Saito, M; Steigerwalt, AG; Patra, KP; Ore, CV; Gotuzzo, E; Gilman, RH; Levett, PN; Vinetz, JM
566	Pseudoalteromonas haloplanktis TAC125 produces 4-hydroxybenzoic acid that induces pyroptosis in human A459 lung adenocarcinoma cells	2018	10.1038/s41598-018-19536-2	Article	English	31	Sannino, F; Sansone, C; Galasso, C; Kildgaard, S; Tedesco, P; Fani, R; Marino, G; de Pascale, D; Ianora, A; Parrilli, E; Larsen, TO; Romano, G; Tutino, ML
567	N-Acetylcysteine (NAC) Ameliorates Lipid-Related Metabolic Dysfunction in Bone Marrow Stromal Cells-Derived Adipocytes	2018	10.1155/2018/5310961	Article	English	13	Raffaele, M; Barbagallo, I; Licari, M; Carota, G; Sferrazzo, G; Spampinato, M; Sorrenti, V; Vanella, L
568	Hyperthermophilic Thermotoga Species Differ with Respect to Specific Carbohydrate Transporters and Glycoside Hydrolases	2012	10.1128/aem.07069-11	Article	English	29	Frock, AD; Gray, SR; Kelly, RM
569	Microbial Diversity Inside Pumpkins: Microhabitat-Specific Communities Display a High Antagonistic Potential Against Phytopathogens	2012	10.1007/s00248-011-9942-4	Article	English	90	Furnkranz, M; Lukesch, B; Muller, H; Huss, H; Grube, M; Berg, G
570	Organic Wastes as Feedstocks for Non-Conventional Yeast-Based Bioprocesses	2019	10.3390/microorganisms7080229	Review	English	23	Do, DTH; Theron, CW; Fickers, P
571	Transcriptome and metabolite analyses in Azadirachta indica: identification of genes involved in biosynthesis of bioactive triterpenoids	2017	10.1038/s41598-017-05291-3	Article	English	14	Bhambhani, S; Lakhwani, D; Gupta, P; Pandey, A; Dhar, YV; Bag, SK; Asif, MH; Trivedi, PK
572	Interleukin-4 Promotes Myogenesis and Boosts Myocyte Insulin Efficacy	2019	10.1155/2019/4182015	Article	English	12	Chang, YH; Tsai, JN; Chen, TL; Ho, KT; Cheng, HY; Hsiao, CW; Shiau, MY
573	Lysosome/lipid droplet interplay in metabolic diseases	2014	10.1016/j.biochi.2013.07.008	Review	English	30	Dugail, I
574	Impact of habitation conditions on metabolism in the muscles, liver, and gonads of different sex and age groups of bream	2021	10.15421/022133	Article	English	0	Payuta, AA; Flerova, EA
575	Overcoming Planktonic and Intracellular Staphylococcus aureus-Associated Infection with a Cell-Penetrating Peptide-Conjugated Antimicrobial Peptide	2020	10.1021/acsinfecdis.0c00264	Article	English	10	Huo, SC; Chen, C; Lyu, ZC; Zhang, ST; Wang, Y; Nie, BE; Yue, B
576	Acinetobacter baumannii NCIMB8209: a Rare Environmental Strain Displaying Extensive Insertion Sequence-Mediated Genome Remodeling Resulting in the Loss of Exposed Cell Structures and Defensive Mechanisms	2020	10.1128/msphere.00404-20	Article	English	6	Repizo, GD; Espariz, M; Seravalle, JL; Miloslavich, JID; Steimbruch, BA; Shuman, HA; Viale, AM
577	Detection by metagenomic functional analysis and improvement by experimental evolution of beta-lactams resistance genes present in oil contaminated soils	2022	10.1038/s41598-022-13883-x	Article	English	0	Alvarez-Marin, MT; Zarzuela, L; Camacho, EM; Santero, E; Flores, A
578	Stimulation of Bathyarchaeota in enrichment cultures by syringaldehyde 4-hydroxybenzaldehyde and vanillin under anaerobic conditions	2022	10.1016/j.ibiod.2022.105409	Article	English	0	Lin, DD; Liu, YF; Zhou, L; Yang, SZ; Gu, JD; Mu, BZ
579	Arf1/COPI machinery acts directly on lipid droplets and enables their connection to the ER for protein targeting	2014	10.7554/elife.01607	Article	English	192	Wilfling, F; Thiam, AR; Olarte, MJ; Wang, J; Beck, R; Gould, TJ; Allgeyer, ES; Pincet, F; Bewersdorf, J; Farese, RV; Walther, TC
580	Insight into a highly polymorphic endophyte isolated from the roots of the halophytic seepweed Suaeda salsa: Laburnicola rhizohalophila sp. nov. (Didymosphaeriaceae, Pleosporales)	2020	10.1016/j.funbio.2019.10.001	Article	English	9	Yuan, ZL; Druzhinina, IS; Wang, XY; Zhang, XG; Peng, L; Labbe, J
581	Microbial and Isotopic Evidence for Methane Cycling in Hydro carbon-Containing Groundwater from the Pennsylvania Region	2017	10.3389/fmicb.2017.00593	Article	English	22	Vigneron, A; Bishop, A; Alsop, EB; Hull, K; Rhodes, I; Hendricks, R; Head, IM; Tsesmetzis, N
582	Medicinal Plants Used in the Treatment of Human Immunodeficiency Virus	2018	10.3390/ijms19051459	Review	English	84	Salehi, B; Kumar, NVA; Sener, B; Sharifi-Rad, M; Kilic, M; Mahady, GB; Vlaisavljevic, S; Iriti, M; Kobarfard, F; Setzer, WN; Ayatollahi, SA; Ata, A; Sharifi-Rad, J
583	Lipid droplet mobilization: The different ways to loosen the purse strings	2016	10.1016/j.biochi.2015.07.010	Review	English	38	D'Andrea, S
584	Microbial populations of the river-recharged Fredericton aquifer	2005	10.1080/01490450500184769	Article	English	6	Haveman, SA; Swanson, EWA; Voordouw, G; Al, TA
585	Molecular detection of Leishmania donovani, Leishmania major, and Trypanosoma species in Sergentomyia squamipleuris sand flies from a visceral leishmaniasis focus in Merti sub-County, eastern Kenya	2021	10.1186/s13071-020-04517-0	Article	English	0	Owino, BO; Mwangi, JM; Kiplagat, S; Mwangi, HN; Ingonga, JM; Chebet, A; Ngumbi, PM; Villinger, J; Masiga, DK; Matoke-Muhia, D
586	Low concentrations of sodium arsenite induce hepatotoxicity in prepubertal male rats	2020	10.1002/tox.22890	Article	English	5	Samelo, RR; de Medeiros, PD; Cavalcante, DND; Aranha, MLG; Duarte, FA; de Castro, IB; Ribeiro, DA; Perobelli, JE
587	Bacillales Members from the Olive Rhizosphere Are Effective Biological Control Agents against the Defoliating Pathotype of Verticillium dahliae	2018	10.3390/agriculture8070090	Article	English	25	Cabanas, CGL; Ruano-Rosa, D; Legarda, G; Pizarro-Tobias, P; Valverde-Corredor, A; Trivino, JC; Roca, A; Mercado-Blanco, J
588	New insights into the molecular mechanism of intestinal fatty acid absorption	2013	10.1111/eci.12161	Review	English	127	Wang, TY; Liu, M; Portincasa, P; Wang, DQH
589	Detection of Escherichia coli in biofilms from pipe samples and coupons in drinking water distribution networks	2007	10.1128/aem.00845-07	Article	English	82	Juhna, T; Birzniece, D; Larsson, S; Zulenkovs, D; Sharipo, A; Azevedo, NF; Menard-Szczebara, F; Castagnet, S; Feliers, C; Keevil, CW
590	Effect of Cultivation Parameters on Fermentation and Hydrogen Production in the Phylum Thermotogae	2021	10.3390/ijms22010341	Review	English	9	Lanzilli, M; Esercizio, N; Vastano, M; Xu, ZH; Nuzzo, G; Gallo, C; Manzo, E; Fontana, A; d'Ippolito, G
591	Keloids: A viral hypothesis	2008	10.1016/j.mehy.2007.03.023	Article	English	22	Atonso, PE; Rioja, LF; Pera, C
592	Transcriptome Analysis of Oleoresin-Producing Tree Sindora Glabra and Characterization of Sesquiterpene Synthases	2018	10.3389/fpls.2018.01619	Article	English	5	Yu, N; Yang, JC; Yin, GT; Li, RS; Zou, WT
593	Bacterial Spore mRNA - What's Up With That?	2020	10.3389/fmicb.2020.596092	Review	English	6	Setlow, P; Christie, G
594	Effects of CO2 enrichment on cockle shell growth interpreted with a Dynamic Energy Budget model	2014	10.1016/j.seares.2014.01.011	Article	English	26	Klok, C; Wijsman, JWM; Kaag, K; Foekema, E
595	Evaluation of extracellular polymeric substances extracted from waste activated sludge as a renewable corrosion inhibitor	2019	10.7717/peerj.7193	Article	English	6	Go, LC; Holmes, W; Depan, D; Hernandez, R
596	Control of variability of primary grain assemblages on the stratigraphic differences in diagenetic processes and products in organic-rich sediments	2021	10.1016/j.sedgeo.2021.105966	Article	English	2	Chukwuma, K; Tsikos, H; Wagner, N
597	ELECTRICAL-RESISTANCE TOMOGRAPHY DURING IN-SITU TRICHLOROETHYLENE REMEDIATION AT THE SAVANNA RIVER SITE	1995	10.1016/0926-9851(95)00003-k	Article	English	98	DAILY, W; RAMIREZ, A
598	Post-Depositional Biodegradation Processes of Pollutants on Glacier Surfaces	2018	10.3390/condmat3030024	Review	English	7	Pittino, F; Ambrosini, R; Azzoni, RS; Diolaiuti, GA; Villa, S; Gandolfi, I; Franzetti, A
599	Genomic and phenotypic characteristics of Swedish C. jejuni water isolates	2017	10.1371/journal.pone.0189222	Article	English	8	Nilsson, A; Johansson, C; Skarp, A; Kaden, R; Engstrand, L; Rautelin, H
600	Influence of different forms of acidities on soil microbiological properties and enzyme activities at an acid mine drainage contaminated site	2010	10.1016/j.jhazmat.2010.03.099	Article	English	24	Sahoo, PK; Bhattacharyya, P; Tripathy, S; Equeenuddin, SM; Panigrahi, MK
601	Coupled carbon and sulfur isotope behaviors and other geochemical perspectives into marine methane seepage	2017	10.1007/s13131-017-0998-y	Article	English	3	Liu, LH; Fu, SY; Zhang, M; Guan, HX; Wu, NY
602	DNA Barcoding Green Microalgae Isolated from Neotropical Inland Waters	2016	10.1371/journal.pone.0149284	Article	English	44	Hadi, SIIA; Santana, H; Brunale, PPM; Gomes, TG; Oliveira, MD; Matthiensen, A; Oliveira, MEC; Silva, FCP; Brasil, BSAF
603	Potential of microbial methane formation in a high-temperature hydrocarbon seep	2012	10.1016/j.apgeochem.2012.04.002	Article	English	3	Ling, YC; Chen, YJ; Sun, CH; Cheng, TW; Wang, PL; Lin, LH
604	Identification of genes specifically required for the anaerobic metabolism of benzene in Geobacter metallireducens	2014	10.3389/fmicb.2014.00245	Article	English	20	Zhang, T; Tremblay, PL; Chaurasia, AK; Smith, JA; Bain, TS; Lovley, DR
605	Microbes in the neonatal intensive care unit resemble those found in the gut of premature infants	2014	10.1186/2049-2618-2-1	Article	English	168	Brooks, B; Firek, BA; Miller, CS; Sharon, I; Thomas, BC; Baker, R; Morowitz, MJ; Banfield, JF
606	Shale gas load recovery modeling and analysis after hydraulic fracturing based on genetic expression programming: A case study of southern Sichuan Basin shale	2022	10.1016/j.jngse.2022.104778	Article	English	1	Ren, L; Wang, ZH; Zhao, JZ; Wu, JJ; Lin, R; Wu, JF; Fu, YQ; Tang, DJ
607	First report of Anaplasma platys infection in red foxes (Vulpes vulpes) and molecular detection of Ehrlichia canis and Leishmania infantum in foxes from Portugal	2015	10.1186/s13071-015-0756-y	Article	English	32	Cardoso, L; Gilad, M; Cortes, HCE; Nachum-Biala, Y; Lopes, AP; Vila-Vicosa, MJ; Simoes, M; Rodrigues, PA; Baneth, G
608	Upregulation of P2Y(2)R, Active uPA, and PAI-1 Are Essential Components of Hantavirus Cardiopulmonary Syndrome	2018	10.3389/fcimb.2018.00169	Article	English	11	Bondu, V; Bitting, C; Poland, VL; Hanson, JA; Harkins, MS; Lathrop, S; Nolte, KB; Lawrence, DA; Buranda, T
609	Host expression of methylmalonyl-CoA mutase and tuberculosis: A missing link?	2011	10.1016/j.mehy.2010.10.040	Article	English	7	de la Fuente, J; Gortazar, C; Vicente, J; Villar, M
610	Mycobacterium xenopi and related organisms isolated from stream waters in Finland and description of Mycobacterium botniense sp nov.	2000	10.1099/00207713-50-1-283	Article	English	27	Torkko, P; Suomalainen, S; Iivanainen, E; Suutari, M; Tortoli, E; Paulin, L; Katila, ML
611	Characteristics and Genesis of Organic Matter within the Lower Member of Yaojia Formation and its Implications for Tabular-type Uranium Deposits in the Southwest of Songliao Basin	2021	10.1134/s1075701521310019	Article	English	0	Huang, SH; Qin, MK; Liu, ZY; Deng, FL; Huang, X; Guo, Q; Jia, LC
612	Effect of light on skeletal delta C-13 and delta O-18, and interaction with photosynthesis, respiration and calcification in two zooxanthellate scleractinian corals	2001	10.1016/s0031-0182(01)00382-0	Article	English	64	Reynaud-Vaganay, S; Juillet-Leclerc, A; Jaubert, J; Gattuso, JP
613	Stenotrophomonas comparative genomics reveals genes and functions that differentiate beneficial and pathogenic bacteria	2014	10.1186/1471-2164-15-482	Article	English	56	Alavi, P; Starcher, MR; Thallinger, GG; Zachow, C; Muller, H; Berg, G
614	OMEGA-3-FATTY-ACIDS AS COADJUVANT TREATMENT IN AIDS	1993	10.1016/0306-9877(93)90070-7	Article	English	12	RAZZINI, E; BARONZIO, GF
615	Biotechnological Applications of Microbial (Per)chlorate Reduction	2017	10.3390/microorganisms5040076	Review	English	21	Wang, OW; Coates, JD
616	Ecological distribution and potential roles of Woesearchaeota in anaerobic biogeochemical cycling unveiled by genomic analysis	2021	10.1016/j.csbj.2021.01.013	Article	English	11	Liu, XB; Wang, YL; Gu, JD
617	Assessing changes in physical and biological properties in a soil contaminated by oil sludges under semiarid Mediterranean conditions	2003	10.1016/s0016-7061(03)00118-6	Article	English	54	Caravaca, F; Roldan, A
618	Structural Insights into the Methane-Generating Enzyme from a Methoxydotrophic Methanogen Reveal a Restrained Gallery of Post-Translational Modifications	2021	10.3390/microorganisms9040837	Article	English	3	Kurth, JM; Muller, MC; Welte, CU; Wagner, T
619	Genomic Analysis of Endophytic Bacillus-Related Strains Isolated from the Medicinal Plant Origanum vulgare L. Revealed the Presence of Metabolic Pathways Involved in the Biosynthesis of Bioactive Compounds	2022	10.3390/microorganisms10050919	Article	English	2	Semenzato, G; Alonso-Vasquez, T; Del Duca, S; Vassallo, A; Riccardi, C; Zaccaroni, M; Mucci, N; Padula, A; Emiliani, G; Piccionello, AP; Puglia, AM; Fani, R
620	Characterization and comparison of microbial communities in sequential sedimentation-biofiltration systems for removal of nutrients in urban rivers	2020	10.1016/j.ecoleng.2020.105796	Article	English	9	Najera, AF; Serwecinska, L; Szklarek, S; Mankiewicz-Boczek, J
621	Origin of quartz in the lower Cambrian Niutitang Formation in south Hubei Province, upper Yangtze platform	2018	10.1016/j.marpetgeo.2018.06.005	Article	English	32	Niu, X; Yan, DT; Zhuang, XG; Liu, ZX; Li, BQ; Wei, XS; Xu, HW; Li, DW
622	Geochemical Mobility and Bioavailability of Heavy Metals in a Lake Affected by Acid Mine Drainage: Lake Hope, Vinton County, Ohio	2010	10.1007/s11270-010-0364-6	Article	English	33	Lopez, DL; Gierlowski-Kordesch, E; Hollenkamp, C
623	Duplicated gene clusters suggest an interplay of glycogen and trehalose metabolism during sequential stages of aerial mycelium development in Streptomyces coelicolor A3(2)	2000	10.1007/s004380051200	Article	English	43	Schneider, D; Bruton, CJ; Chater, KF
624	Floral and Foliar Source Affect the Bee Nest Microbial Community	2019	10.1007/s00248-018-1300-3	Article	English	27	Rothman, JA; Andrikopoulos, C; Cox-Foster, D; McFrederick, QS
625	Enterocytozoon bieneusi genotypes in cats and dogs in Victoria, Australia	2019	10.1186/s12866-019-1563-y	Article	English	13	Zhang, Y; Koehler, AV; Wang, T; Cunliffe, D; Gasser, RB
626	Different metabolism of EPA, DPA and DHA in humans: A double-blind cross-over study	2020	10.1016/j.plefa.2019.102033	Article	English	18	Guo, XF; Tong, WF; Ruan, Y; Sinclair, AJ; Li, D
627	Enhancing photosynthetic biomass productivity of industrial oleaginous microalgae by overexpression of RuBisCO activase	2017	10.1016/j.algal.2017.07.023	Article	English	57	Wei, L; Wang, QT; Xin, Y; Lu, YD; Xu, J
628	Colombian Andean thermal springs: reservoir of thermophilic anaerobic bacteria producing hydrolytic enzymes	2019	10.1007/s00792-019-01132-5	Article	English	2	Rubiano-Labrador, C; Diaz-Cardenas, C; Lopez, G; Gomez, J; Baena, S
629	Biogenic volatile emissions from the soil	2014	10.1111/pce.12340	Review	English	210	Penuelas, J; Asensio, D; Tholl, D; Wenke, K; Rosenkranz, M; Piechulla, B; Schnitzler, JP
630	The onset of brain injury and neurodegeneration triggers the synthesis of docosanoid neuroprotective signaling	2006	10.1007/s10571-006-9064-6	Article	English	66	Bazan, NG
631	Depositional facies and aqueous-solid geochemistry of travertine-depositing hot springs (Angel Terrace, Mammoth Hot Springs, Yellowstone National Park, USA)	2000	10.1306/2dc40929-0e47-11d7-8643000102c1865d	Review	English	270	Fouke, BW; Farmer, JD; Des Marais, DJ; Pratt, L; Sturchio, NC; Burns, PC; Discipulo, MK
632	Rapid alterations of avian medullary bone material during the daily egg-laying cycle	2014	10.1016/j.bone.2014.08.019	Article	English	51	Kerschnitzki, M; Zander, T; Zaslansky, P; Fratzl, P; Shahar, R; Wagermaier, W
633	Detrital layers marking flood events in recent sediments of Lago Maggiore (N. Italy) and their comparison with instrumental data	2012	10.1111/j.1365-2427.2012.02796.x	Article	English	19	Kampf, L; Brauer, A; Dulski, P; Lami, A; Marchetto, A; Gerli, S; Ambrosetti, W; Guilizzoni, P
634	ENERGETICS OF THE VENTILATORY PISTON PUMP OF THE LUGWORM, A DEPOSIT-FEEDING POLYCHAETE LIVING IN A BURROW	1994	10.2307/1542055	Article	English	9	TOULMOND, A; DEJOURS, P
635	Improving surface and transport properties of macroporous hydrogels for bone regeneration	2015	10.1002/jbm.a.35246	Article	English	8	Guarino, V; Galizia, M; Alvarez-Perez, M; Mensitieri, G; Ambrosio, L
636	Evidencing the role of carbonic anhydrase in the formation of carbonate minerals by bacterial strains isolated from extreme environments in Qatar	2022	10.1016/j.heliyon.2022.e11151	Article	English	0	Abdelsamad, R; Al Disi, Z; Abu-Dieyeh, M; Al-Ghouti, MA; Zouari, N
637	Microbial Nitrogen Metabolism in Chloraminated Drinking Water Reservoirs	2020	10.1128/msphere.00274-20	Article	English	12	Potgieter, SC; Dai, ZH; Venter, SN; Sigudu, M; Pinto, AJ
638	Bioactive Compounds and Health-Promoting Capacity of Some Caucasian Endemic and Rare Medicinal Plants	2012	10.17660/actahortic.2012.955.51	Proceedings Paper	English	2	Manukyan, A
639	Phytochemicals That Influence Gut Microbiota as Prophylactics and for the Treatment of Obesity and Inflammatory Diseases	2018	10.1155/2018/9734845	Review	English	89	Carrera-Quintanar, L; Roa, RIL; Quintero-Fabian, S; Sanchez-Sanchez, MA; Vizmanos, B; Ortuno-Sahagun, D
640	Valorization of Traditional Italian Walnut (Juglans regia L.) Production: Genetic, Nutritional and Sensory Characterization of Locally Grown Varieties in the Trentino Region	2022	10.3390/plants11151986	Article	English	1	Di Pierro, EA; Franceschi, P; Endrizzi, I; Farneti, B; Poles, L; Masuero, D; Khomenko, I; Trenti, F; Marrano, A; Vrhovsek, U; Gasperi, F; Biasioli, F; Guella, G; Bianco, L; Troggio, M
641	Drought stress has transgenerational effects on seeds and seedlings in winter oilseed rape (Brassica napus L.)	2018	10.1186/s12870-018-1531-y	Article	English	59	Hatzig, SV; Nuppenau, JN; Snowdon, RJ; Schiessl, SV
642	Communication requested: Boar semen transport through the uterus and possible consequences for insemination	2016	10.1016/j.theriogenology.2015.09.016	Article	English	13	Rath, D; Knorr, C; Taylor, U
643	Matricaria chamomilla: A valuable insight into recent advances in medicinal uses and pharmacological activities	2022	10.1007/s11101-022-09817-0	Review	English	2	El Joumaa, MM; Borjac, JM
644	STUDY OF HEAT AND MASS TRANSFER IN THE EYRING-POWELL MODEL OF FLUID PROPAGATING PERISTALTICALLY THROUGH A RECTANGULAR COMPLIANT CHANNEL	2019	10.1615/heattransres.2019025622	Article	English	103	Riaz, A; Ellahi, R; Bhatti, MM; Marin, M
645	Diversity of Methane-Cycling Archaea in Hydrothermal Sediment Investigated by General and Group-Specific PCR Primers	2015	10.1128/aem.03588-14	Article	English	39	Lever, MA; Teske, AP
646	Complementary information on in vitro conversion of amorphous (precursor) calcium phosphate to hydroxyapatite from raman microspectroscopy and wide-angle X-ray scattering	2006	10.1007/s00223-006-0011-9	Article	English	111	Kazanci, M; Fratzl, P; Klaushofer, K; Paschalis, EP
647	The Role of Bone Phosphorus, Calcium and Magnesium on Bone Reserves of Indigenous Mixed Breed Cattle Grazing Natural Pasture during Times of Mineral Stress Induced by Drought in Mogosane Village of North West Province, South Africa	2020	10.18805/ijar.b-1205	Article	English	0	Mokolopi, BG
648	Microbial stabilization of riverine sediments by extracellular polymeric substances	2008	10.1111/j.1472-4669.2007.00120.x	Article	English	103	Gerbersdorf, SU; Jancke, T; Westrich, B; Paterson, DM
649	Quantifying the Importance of the Rare Biosphere for Microbial Community Response to Organic Pollutants in a Freshwater Ecosystem	2017	10.1128/aem.03321	Article	English	34	Wang, YQ; Hatt, JK; Tsementzi, D; Rodriguez, RLM; Ruiz-Perez, CA; Weigand, MR; Kizer, H; Maresca, G; Krishnan, R; Poretsky, R; Spain, JC; Konstantinidis, KT
650	Phosphate Metabolism in Health and Disease	2021	10.1007/s00223-020-00686-3	Review	English	35	Peacock, M
651	Sulfur isotope variations from orebody to hand-specimen scale at the Mezica lead-zinc deposit, Slovenia: a predominantly biogenic pattern	2010	10.1007/s00126-010-0290-y	Article	English	15	Herlec, U; Spangenberg, JE; Lavric, JV
652	Characterization of an anaerobic marine microbial community exposed to combined fluxes of perchlorate and salinity	2016	10.1007/s00253-016-7780-5	Article	English	19	Carlstrom, CI; Lucas, LN; Rohde, RA; Haratian, A; Engelbrektson, AL; Coates, JD
653	Comparative Study on Thermodynamic and Geochemical Characteristics between Cemented and Clotted Parts of Thrombolite	2020	10.3390/cryst10111017	Article	English	0	Zhuang, DX; Guo, Y; Chen, S
654	Quantifying carbon sources in the formation of authigenic carbonates at gas hydrate sites in the Gulf of Mexico	2004	10.1016/j.chemgeo.2003.12.021	Article	English	114	Formolo, MJ; Lyons, TW; Zhang, CL; Kelley, C; Sassen, R; Horita, J; Cole, DR
655	Fluid flow and late diagenesis of fault-infill carbonates in the Aptian dolostones at Jabel Semmama, Kasserine area, western-central Tunisia	2020	10.1016/j.marpetgeo.2019.07.051	Article	English	2	Hajri, H; Abdallah, H
656	Cycling of biogenic elements drives biogeochemical gold cycling	2019	10.1016/j.earscirev.2018.12.010	Review	English	24	Sanyal, SK; Shuster, J; Reith, F
657	Living Bacteria Directly Embedded into Electrospun Nanofibers: Design of New Anode for Bio-Electrochemical Systems	2021	10.3390/nano11113088	Article	English	2	Massaglia, G; Sacco, A; Chiodoni, A; Pirri, CF; Quaglio, M
658	Lipid acquisition and retention in tissues of spawning adult paddlefish Polyodon spathula (Walbaum, 1792) in relation to extended and compressed life history patterns in two river-reservoir systems	2018	10.1111/jai.13580	Article	English	1	Hemingway, RJ; Scarnecchia, DL
659	DORSOMEDIAL HINDBRAIN CATECHOLAMINE REGULATION OF HYPOTHALAMIC ASTROCYTE GLYCOGEN METABOLIC ENZYME PROTEIN EXPRESSION: IMPACT OF ESTRADIOL	2015	10.1016/j.neuroscience.2015.02.019	Article	English	10	Tamrakar, P; Shrestha, PK; Briski, KP
660	Energy requirements of migrating Great White Pelicans Pelecanus onocrotalus	2000	10.1111/j.1474-919x.2000.tb04860.x	Article	English	11	Shmueli, M; Izhaki, I; Arieli, A; Arad, Z
661	Genomic characterization of Defluviitoga tunisiensis L3, a key hydrolytic bacterium in a thermophilic biogas plant and its abundance as determined by metagenome fragment recruitment	2016	10.1016/j.jbiotec.2016.05.001	Article; Proceedings Paper	English	37	Maus, I; Cibis, KG; Bremges, A; Stolze, Y; Wibberg, D; Tomazetto, G; Blom, J; Sczyrba, A; Konig, H; Puhler, A; Schluter, A
662	Micro-scale quadruple sulfur isotope analysis of pyrite from the similar to 3480 Ma Dresser Formation: New insights into sulfur cycling on the early Earth	2015	10.1016/j.precamres.2014.12.012	Article	English	29	Wacey, D; Noffke, N; Cliff, J; Barley, ME; Farquhar, J
663	Seasonal epidemiology of gastrointestinal nematodes of cattle in the northern continental climate zone of western Canada as revealed by internal transcribed spacer-2 ribosomal DNA nemabiome barcoding	2021	10.1186/s13071-021-05101-w	Article	English	3	Wang, T; Redman, EM; Morosetti, A; Chen, R; Kulle, S; Morden, N; McFarland, C; Vineer, HR; Colwell, DD; Morgan, ER; Gilleard, JS
664	Improved Reactor Performance and Operability in the Biotransformation of Carveol to Carvone Using a Solid-Liquid Two-Phase Partitioning Bioreactor	2008	10.1002/bit.21957	Article	English	43	Morrish, JLE; Daugulis, AJ
665	Biosynthesis, accumulation and emission of carotenoids, alpha-tocopherol, plastoquinone, and isoprene in leaves under high photosynthetic irradiance	2007	10.1007/s11120-007-9204-y	Review	English	172	Lichtenthaler, HK
666	The role of Omega-3 docosapentaenoic acid in pregnancy and early development	2016	10.1002/ejlt.201600076	Review	English	10	Li, J; Yin, HX; Bibus, DM; Byelashov, OA
667	Pomacea canaliculata Ampullar Proteome: A Nematode-Based Bio-Pesticide Induces Changes in Metabolic and Stress-Related Pathways	2021	10.3390/biology10101049	Article	English	3	Boraldi, F; Lofaro, FD; Bergamini, G; Ferrari, A; Malagoli, D

## Sheet: Without DOI
Item	Title	Year	DOI	Document Type	Language	Cited By	Author(s)
50	Indigenous microbial diversity in conglomerate oil reservoirs analyzed by PCR-DGGE	2009		Proceedings Paper	English	0	She, YH; Zhang, F; Shu, FC; Zhao, LP; Yu, LJ
92	Microbial Communities of oil contaminated soils in oilfields of China	2008		Proceedings Paper	English	0	Jia, JL; Li, GH
94	APPLICATION OF MICROBIAL ENHANCED OIL-RECOVERY TECHNIQUE TO A TURKISH HEAVY OIL	1992		Note	English	16	BEHLULGIL, K; MEHMETOGLU, T; DONMEZ, S
117	Mechanism and Pilot Test to Enhance Oil Recovery By Microbial Local Enrichment	2010		Proceedings Paper	English	0	Li, YQ; Jing, GC
142	DETECTION OF DESULFOBACTER IN OIL-FIELD ENVIRONMENTS BY NONRADIOACTIVE DNA PROBES	1994		Article	English	16	BRINK, DE; VANCE, I; WHITE, DC
220	Ranking Asset Integrity Risk of Oilfield Water Handling Systems	2017		Article	English	0	Olabisi, O; Al-Shamari, AR; Al-Sulaiman, S; Jarragh, A; Mathew, A
236	Effect of electrochemical oxidation potential on biofilter for bacteriological oxidation VOCS to CO2	2006		Article	English	4	Kang, HS; Lee, JK; Kim, MH; Park, DH
238	Numerical Modeling on the Influence of Effective Porosity, Microbial Kinetics, and Operational Parameters on Enhanced Oil Recovery by Microbial Flooding Within a Sandstone Formation	2020		Article	English	4	Chakraborty, S; Govindarajan, SK; Gummadi, SN
256	Fundamental studies for microbial enhanced oil recovery field test	2000		Review	Japanese	1	Enomoto, H; Fujiwara, K; Yonebayashi, T
283	Culture-independent-based Analyses Identified Site-specific Microbial in Two Oil-wells from Malaysia	2015		Article	English	0	Fish-Low, CY; Hamzah, A; Chee, HY
287	Evaluation of the use of amplified 16S rRNA gene-restriction fragment length polymorphism analysis to detect Enterobacter cloacae and Bacillus licheniformis for microbial enhanced oil recovery field pilot	1999		Article	English	7	Fujiwara, K; Tanaka, S; Ohtsuka, M; Ichimura, N; Yonebayashi, H; Hong, CX; Enomoto, H
311	A Study on Numerical Simulation for Functional Microbial Flooding	2016		Proceedings Paper	English	0	Xiu, JL; Zhu, WY; Guo, Y; Yu, L
313	Iron-reducing bacteria - Ecology, significance and potential uses	2004		Proceedings Paper	English	1	Greene, AC; Ogg, CD; Lynch, KM; Pope, PB; Patel, BKC
330	Reservoir sedimentation: 1D model of turbidity currents and delta deposits	2006		Proceedings Paper	English	2	Gonzalez, J; Tamburrino, A; Nino, Y
358	Molecular diversity of bacterial communities from subseafloor rock samples in a deep-water production basin in Brazil	2008		Article	English	19	Von Der Weid, I; Korenblum, E; Jurelevicius, D; Rosado, AS; Dino, R; Sebastian, GV; Seldin, L
419	Contamination of the Caspian Sea ecosystem with organic pollutants	2001		Proceedings Paper	English	1	Lebedev, AT; Poliakova, O; Dianova, IV
433	A new solution to sour gas wells	1997		Proceedings Paper	English	0	Hitzman, DO; Dennis, DM
459	STABLE ISOTOPE EVIDENCE FOR THE ORIGIN OF THE URKUT MANGANESE ORE DEPOSIT, HUNGARY	1991		Article	English	76	POLGARI, M; OKITA, PM; HEIN, JR
464	Experimental Study of Borehole Logs for Oil and Gas Exploration	2015		Proceedings Paper	English	0	Imran, S; Khan, N
504	GREEN-ALGAE AND WASTE TREATMENT TECHNOLOGY	1994		Article	English	1	SLADECKOVA, A
522	Use of Some Additives for Improving Mesenchymal Stem Cell Isolation Outcomes in Non-Mobilized Peripheral Blood	2018		Article	English	3	Pouryazdanpanah, N; Vahidi, R; Dabiri, S; Derakhshani, A; Farsinejad, A
530	MICROCHIP CAPILLARY ELECTROPHORESIS DEVICE FOR AMPEROMETRIC DETECTION OF DNA WITH REDOX INTERCALATION	2011		Proceedings Paper	English	0	Chand, R; Jang, YC; Jha, SK; Kim, YS
540	TETRANECTIN, A PLASMINOGEN KRINGLE 4-BINDING PROTEIN - CLONING AND GENE-EXPRESSION PATTERN IN HUMAN COLON CANCER	1992		Article	English	59	WEWER, UM; ALBRECHTSEN, R
556	Investigations on Microbiological Degradation of Polymers Applied in Drilling Fluids Technology	2009		Article	Polish	2	Kapusta, P; Turkiewicz, A
572	The submarine hydrothermal system of Panarea (Southern Italy): biogeochemical processes at the thermal fluids-sea bottom interface	2006		Article	English	29	Gugliandolo, C; Italiano, F; Maugeri, TL
600	BIODEGRADATION OF N-HEXADECANE BY ENTERIC BACTERIA ISOLATED FROM AN OIL-FIELD WASTEWATER TREATMENT PLANT	2018		Article	English	1	Zhang, CF; Xu, LH; Zhou, HH; Tan, ZH; Xie, QL; Xu, YJ
636	What is visceral obesity?	1997		Article	English	1	Ditschuneit, H; Ditschuneit, HH
645	Theme and variation among silencing proteins in Saccharomyces cerevisiae and Kluyveromyces lactis	1998		Article	English	29	Astrom, SU; Rine, J
649	Hypersaline microbial systems of Sabkhas: Examples of life's survival in "extreme"' conditions	2004		Article; Proceedings Paper	English	27	Krumbein, WE; Gorbushina, AA; Holtkamp-Tacken, E
655	Molecular identification of non-Cryptococcus yeasts associated with pigeon droppings in Shiraz, Southern Iran	2019		Article	English	3	Pakshir, K; Zareshahrabadi, Z; Zomorodian, K; Ansari, S; Nouraei, H; Gharavi, A

## Sheet: Duplicates
Item	Title	Year	DOI	Document Type	Language	Cited By	Author(s)	Duplicate Type
