# Supplementary material for: Metabolically Active Microbial Communities in Oilfields: A Systematic Review and Synthesis of RNA Preservation, Extraction, and Sequencing Methods
Source: MDPI journal article supplement (doi:10.3390/applmicrobiol3040079), 2023-10-06
Supplement: s1 [file s1 › Table S4. Web of Science (Search in title or abstract or keyword)_697 records _20.01.2023.xls]

PT	AU	BA	BE	GP	AF	BF	CA	TI	SO	SE	BS	LA	DT	CT	CY	CL	SP	HO	DE	ID	AB	C1	C3	RP	EM	RI	OI	FU	FP	FX	CR	NR	TC	Z9	U1	U2	PU	PI	PA	SN	EI	BN	J9	JI	PD	PY	VL	IS	PN
J	Zhang, F; Su, SB; Yu, GM; Zheng, BW; Shu, FC; Wang, ZL; Xiang, TS; Dong, H; Zhang, ZZ; Hou, DJ; She, YH				Zhang, Fan; Su, Sanbao; Yu, Gaoming; Zheng, Beiwen; Shu, Fuchang; Wang, Zhengliang; Xiang, Tingsheng; Dong, Hao; Zhang, Zhongzhi; Hou, Dujie; She, Yuehui			High quality genome sequence and description of Enterobacter mori strain 5-4, isolated from a mixture of formation water and crude-oil	STANDARDS IN GENOMIC SCIENCES			English	Article						Enterobacter mori strain 5-4; Formation water; Hydrocarbon degradation; Genome	COG DATABASE; ANNOTATION; GENES; TOOL	Enterobacter mori strain 5-4 is a Gram-negative, motile, rod shaped, and facultatively anaerobic bacterium, which was isolated from a mixture of formation water (also known as oil-reservior water) and crude-oil in Karamay oilfield, China. To date, there is only one E. mori genome has been sequenced and very little knowledge about the mechanism of E. mori adapted to the petroleum reservoir. Here, …	[Zhang, Fan; Hou, Dujie] China Univ Geosci, Key Lab Marine Reservoir Evolut & Hydrocarbon Acc, Sch Energy Resources, Beijing, Peoples R China; [Su, Sanbao; Shu, Fuchang; Wang, Zhengliang; Xiang, Tingsheng; She, Yuehui] Yangtze Univ, Coll Chem & Environm Engn, Jingzhou, Peoples R China; [Yu, Gaoming] Yangtze Univ, Coll Petr Engn, Jingzhou, Peoples R China; [Zheng, Beiwen] Zhejiang Univ, State Key …	China University of Geosciences; Yangtze University; Yangtze University; Zhejiang University; China University of Petroleum	Zheng, BW (corresponding author), Zhejiang Univ, State Key Lab Diag & Treatment Infect Dis, Hangzhou 310003, Zhejiang, Peoples R China.	zhengbw@zju.edu.cn; sheyuehui@263.net	she, yuehui/HGA-7099-2022	Zhang, Fan/0000-0001-8668-0235	National Natural Science Foundation of China [81301461, 51474034]; Ministry of Science and Technology, Zhejiang Provincial Natural Science Foundation of China [2013AA064402]; Scientific Research Foundation of Zhejiang Provincial Health Bureau [2012KYB083]	National Natural Science Foundation of China(National Natural Science Foundation of China (NSFC)); Ministry of Science and Technology, Zhejiang Provincial Natural Science Foundation of China; Scientific Research Foundation of Zhejiang Provincial Health Bureau	This study was sponsored by the National Natural Science Foundation of China (Grant No. 81301461 and No. 51474034), 863 Program (Grant No. 2013AA064402) of the Ministry of Science and Technology, Zhejiang Provincial Natural Science Foundation of China (Grant No. LQ13H190002) and the Scientific Research Foundation of Zhejiang Provincial Health Bureau (Grant No. 2012KYB083).		42	3	3	0	16	BMC	LONDON	CAMPUS, 4 CRINAN ST, LONDON N1 9XW, ENGLAND	1944-3277			STAND GENOMIC SCI	Stand. Genomic Sci.	FEB 27	2015	10
J	Cai, MM; Yu, C; Wang, RX; Si, YX; Masakorala, K; Yuan, HY; Yao, J; Zhang, JB				Cai, Minmin; Yu, Chan; Wang, Ruixia; Si, Yanxiao; Masakorala, Kanaji; Yuan, Haiyan; Yao, Jun; Zhang, Jibin			Effects of oxygen injection on oil biodegradation and biodiversity of reservoir microorganisms in Dagang oil field, China	INTERNATIONAL BIODETERIORATION & BIODEGRADATION			English	Article						Aerobic oil biodegradation; Reservoir microorganisms; Biodiversity; PAHs; Microbial enhanced oil recovery	GEL-ELECTROPHORESIS ANALYSIS; 16S RIBOSOMAL-RNA; PETROLEUM RESERVOIR; MICROBIAL-POPULATIONS; RECOVERY; CRUDE; DEGRADATION; WATER; SOIL; BIOTECHNOLOGY	Effects of oxygen inoculation were investigated on oil biodegradation and biodiversity of reservoir microorganism in Dagang oil field. The biodegrading was evaluated and analyzed or estimated by using in-vitro enrichment, denaturing gradient gel electrophoresis, real time PCR and GC-MS. The bacterial communities of production water containing reservoir microorganism were 30% lower than groundwate…	[Cai, Minmin; Yu, Chan; Wang, Ruixia; Si, Yanxiao; Masakorala, Kanaji; Yuan, Haiyan; Yao, Jun] Univ Sci & Technol Beijing, Natl Int Cooperat Based Environm & Energy, Sch Civil & Environm Engn, Beijing 100083, Peoples R China; [Cai, Minmin; Zhang, Jibin] Huazhong Agr Univ, Coll Life Sci & Technol, Natl Engn Res Ctr Microbial Pesticides, State Key Lab Agr Microbiol, Wuhan 430070, Peoples R China; […	University of Science & Technology Beijing; Huazhong Agricultural University; University Ruhuna	Yao, J (corresponding author), Univ Sci & Technol Beijing, Natl Int Cooperat Based Environm & Energy, Sch Civil & Environm Engn, 30 Xueyuan Rd, Beijing 100083, Peoples R China.	yaojun@ustb.edu.cn; zhangjb@mail.hzau.edu.cn			International Joint Key Project from Chinese Ministry of Science and Technology [2010DFB23160]; International Joint Key Project from National Natural Science Foundation of China [40920134003]; National Natural Science Foundation of China [41273092]; National Outstanding Youth Research Foundation of China [40925010]	International Joint Key Project from Chinese Ministry of Science and Technology; International Joint Key Project from National Natural Science Foundation of China(National Natural Science Foundation of China (NSFC)); National Natural Science Foundation of China(National Natural Science Foundation of China (NSFC)); National Outstanding Youth Research Foundation of China	This work is supported in part by grants from the International Joint Key Project from Chinese Ministry of Science and Technology (2010DFB23160), International Joint Key Project from National Natural Science Foundation of China (40920134003), National Natural Science Foundation of China (41273092), and National Outstanding Youth Research Foundation of China (40925010).		39	12	14	2	53	ELSEVIER SCI LTD	OXFORD	THE BOULEVARD, LANGFORD LANE, KIDLINGTON, OXFORD OX5 1GB, OXON, ENGLAND	0964-8305	1879-0208		INT BIODETER BIODEGR	Int. Biodeterior. Biodegrad.	MAR	2015	98
J	Zhou, L; Lu, YW; Wang, DW; Zhang, SL; Tang, EG; Qi, ZZ; Xie, SN; Wu, J; Liang, B; Liu, JF; Yang, SZ; Zhang, J; Gu, JD; Mu, BZ				Zhou, Lei; Lu, Yu-Wei; Wang, Da-Wei; Zhang, Shi-Lun; Tang, En-Gao; Qi, Zhen-Zhen; Xie, Sheng-Nan; Wu, Jun; Liang, Bo; Liu, Jin-Feng; Yang, Shi-Zhong; Zhang, Jian; Gu, Ji-Dong; Mu, Bo-Zhong			Microbial community composition and diversity in production water of a high-temperature offshore oil reservoir assessed by DNA- and RNA-based analyses	INTERNATIONAL BIODETERIORATION & BIODEGRADATION			English	Article						Offshore petroleum reservoir; Microbial community; DNA- and RNA-Based; Active community; 16S rRNA sequencing	16S RIBOSOMAL-RNA; PETROLEUM RESERVOIRS; BACTERIAL COMMUNITIES; MOLECULAR ANALYSIS; SUBSURFACE OIL; N-ALKANES; GEN-NOV; NITRATE; SULFIDE; DEGRADATION	Microbial activity is ubiquitous and important in petroleum reservoir systems; however, current knowledge regarding the diversity and functions of microbial communities that are active in offshore petroleum reservoirs remains very limited. In the present work, high-throughput sequencing analysis of the 16S rRNA gene (DNA) and transcripts (RNA) was applied to respectively characterize the genomic …	[Zhou, Lei; Wang, Da-Wei; Zhang, Shi-Lun; Tang, En-Gao; Zhang, Jian] State Key Lab Offshore Oil Exploitat, Beijing 100028, Peoples R China; [Zhou, Lei; Lu, Yu-Wei; Qi, Zhen-Zhen; Xie, Sheng-Nan; Wu, Jun; Liang, Bo; Liu, Jin-Feng; Yang, Shi-Zhong; Mu, Bo-Zhong] East China Univ Sci & Technol, State Key Lab Bioreactor Engn, 130 Meilong Rd, Shanghai 200237, Peoples R China; [Zhou, Lei; Lu, Yu-Wei; Qi…	East China University of Science & Technology; East China University of Science & Technology; Guangdong Technion Israel Institute of Technology; East China University of Science & Technology	Zhang, J (corresponding author), State Key Lab Offshore Oil Exploitat, Beijing 100028, Peoples R China.; Mu, BZ (corresponding author), East China Univ Sci & Technol, State Key Lab Bioreactor Engn, 130 Meilong Rd, Shanghai 200237, Peoples R China.; Mu, BZ (corresponding author), East China Univ Sci & Technol, Sch Chem & Mol Engn, 130 Meilong Rd, Shanghai 200237, Peoples R China.	zhangjian@cnooc.com.cn; bzmu@ecust.edu.cn	Mu, Bo-Zhong/F-4704-2017	Mu, Bo-Zhong/0000-0002-9564-4970	Open fund of State Key Laboratory of Offshore Oil Exploitation [CCL2018RCPS0028RON]	Open fund of State Key Laboratory of Offshore Oil Exploitation	This work was supported by Open fund of State Key Laboratory of Offshore Oil Exploitation (CCL2018RCPS0028RON).		78	14	16	4	46	ELSEVIER SCI LTD	OXFORD	THE BOULEVARD, LANGFORD LANE, KIDLINGTON, OXFORD OX5 1GB, OXON, ENGLAND	0964-8305	1879-0208		INT BIODETER BIODEGR	Int. Biodeterior. Biodegrad.	JUL	2020	151
J	Das, B; Deka, S				Das, Bhaskar; Deka, Suresh			A cost-effective and environmentally sustainable process for phycoremediation of oil field formation water for its safe disposal and reuse	SCIENTIFIC REPORTS			English	Article							GAS PRODUCED WATER; CHEMICAL OXYGEN-DEMAND; WASTE-WATER; CRUDE-OIL; AROMATIC-HYDROCARBONS; BIODEGRADATION; DEGRADATION; CULTIVATION; MICROALGAL; SULFATE	High volumes of formation water comprising of complex mixture of hydrocarbons is generated during crude oil exploration. Owing to ecotoxicological concerns, the discharge of the formation water without remediation of hydrocarbonaceous pollutants is not permitted. Keeping this into mind, we carried out phycoremediation of hydrocarbons in formation water so that it can be safely discharged or reuse…	[Das, Bhaskar; Deka, Suresh] Inst Adv Study Sci & Technol, Life Sci Div, Environm Biotechnol Lab, Gauhati, Assam, India	Department of Science & Technology (India); Institute of Advanced Study in Science & Technology (IASST)	Deka, S (corresponding author), Inst Adv Study Sci & Technol, Life Sci Div, Environm Biotechnol Lab, Gauhati, Assam, India.	sureshdeka@gmail.com			Science and Engineering Research Board (SERB), Govt. of India [PDF/2017/001374]	Science and Engineering Research Board (SERB), Govt. of India	Dr. Bhaskar Das acknowledges Science and Engineering Research Board (SERB), Govt. of India for providing National Post Doctoral Fellowship (PDF/2017/001374) to support postdoctoral research at Institute of Advanced Study in Science and Technology (IASST).		59	10	10	4	7	NATURE PUBLISHING GROUP	LONDON	MACMILLAN BUILDING, 4 CRINAN ST, LONDON N1 9XW, ENGLAND	2045-2322			SCI REP-UK	Sci Rep	OCT 23	2019	9
J	Zapata-Penasco, I; Salazar-Coria, L; Saucedo-Garcia, M; Villa-Tanaca, L; Hernandez-Rodriguez, C				Zapata-Penasco, I.; Salazar-Coria, L.; Saucedo-Garcia, M.; Villa-Tanaca, L.; Hernandez-Rodriguez, C.			Bisulfite reductase gene expression of thermophilic sulphate-reducing bacteria from saline connate water of oil reservoirs with high temperature	INTERNATIONAL BIODETERIORATION & BIODEGRADATION			English	Article						dsrA gene expression; Halophilic thermophilic SRB; Desulfovibrionales; Saline connate water; High temperature oil reservoir	CONTINENTAL HIGH-TEMPERATURE; MULTIPLE SEQUENCE ALIGNMENT; COMMUNITY; PHYLOGENIES; DIVERSITY	Connate water (fossil water) is produced during exploitation of oil reservoirs. It may be injected into mature reservoirs during Enhanced Oil Recovery (EOR). Sulphate-reducing bacteria (SRB) are associated with induced corrosion, souring gas, and oil reservoirs. Besides, the mesophilic Desulfovibrionales SRB are common in produced waters. Since the dsrAB transcripts can be related to the activity…	[Zapata-Penasco, I.; Villa-Tanaca, L.; Hernandez-Rodriguez, C.] IPN, Escuela Nacl Ciencias Biol, Dept Microbiol, Prol Carpio & Plan Ayala S-N Col Sto Tomas, Mexico City 11340, DF, Mexico; [Zapata-Penasco, I.; Salazar-Coria, L.; Saucedo-Garcia, M.] IMP, Coordinac Ingn Mol, Mexico City, DF, Mexico	Instituto Politecnico Nacional - Mexico; Instituto Mexicano del Petroleo	Zapata-Penasco, I (corresponding author), IPN, Escuela Nacl Ciencias Biol, Dept Microbiol, Prol Carpio & Plan Ayala S-N Col Sto Tomas, Mexico City 11340, DF, Mexico.	izapata@imp.mx	Hernández-Rodríguez, César/R-1581-2018	Hernández-Rodríguez, César/0000-0003-2411-9789; Zapata-Penasco, Icoquih/0000-0003-1580-1321; Hernandez, Cesar/0000-0002-6690-9183	Escuela Nacional de Ciencias Biologicas, of the Instituto Politecnico Nacional [SIP20120738, SIP20151102]; Coordinacion de Ingenieria Molecular of the Instituto Mexicano del Petroleo	Escuela Nacional de Ciencias Biologicas, of the Instituto Politecnico Nacional; Coordinacion de Ingenieria Molecular of the Instituto Mexicano del Petroleo	The authors are grateful for the support to the SIP20120738, SIP20151102 grants of the Escuela Nacional de Ciencias Biologicas, of the Instituto Politecnico Nacional and to the Coordinacion de Ingenieria Molecular of the Instituto Mexicano del Petroleo.		45	6	7	2	30	ELSEVIER SCI LTD	OXFORD	THE BOULEVARD, LANGFORD LANE, KIDLINGTON, OXFORD OX5 1GB, OXON, ENGLAND	0964-8305	1879-0208		INT BIODETER BIODEGR	Int. Biodeterior. Biodegrad.	MAR	2016	108
J	Gruner, A; Jarling, R; Vieth-Hillebrand, A; Mangelsdorf, K; Janka, C; van der Kraan, GM; Kohler, T; Morris, BEL; Wilkes, H				Gruner, Andrea; Jarling, Rene; Vieth-Hillebrand, Andrea; Mangelsdorf, Kai; Janka, Christoph; van der Kraan, Geert M.; Koehler, Thomas; Morris, Brandon E. L.; Wilkes, Heinz			Tracing microbial hydrocarbon transformation processes in a high temperature petroleum reservoir using signature metabolites	ORGANIC GEOCHEMISTRY			English	Article						Alkyl succinic acids; Aromatic acids; Petroleum reservoirs; Metabolites; Microbial metabolism	SULFATE-REDUCING BACTERIUM; ALPINE FORELAND BASIN; STABLE CARBON-ISOTOPE; ANAEROBIC DEGRADATION; DENITRIFYING BACTERIUM; AROMATIC-HYDROCARBONS; ENRICHMENT CULTURE; CRUDE-OIL; CONTAMINATED AQUIFER; THAUERA AROMATICA	The consequences of microbial activity in petroleum reservoirs, such as deterioration in crude oil quality and technical problems in oil production were recognized a long time ago, while the metabolic capability and hydrocarbon transformation processes of microorganisms are less understood. In this study, petroleum hydrocarbons serving as substrates for microorganisms, as well as the organic acid…	[Gruner, Andrea; Jarling, Rene; Vieth-Hillebrand, Andrea; Mangelsdorf, Kai; Wilkes, Heinz] Helmholtz Ctr Potsdam, GFZ German Res Ctr Geosci, Sect 3-2 Organ Geochem, D-14473 Potsdam, Germany; [Jarling, Rene; Wilkes, Heinz] Carl von Ossietzky Univ Oldenburg, Inst Chem & Biol Marine Environm ICBM, D-26111 Oldenburg, Germany; [Janka, Christoph] RAG Rohol Aufsuchungs Aktiengesellschaft, Kremsmunster, …	Helmholtz Association; Helmholtz-Center Potsdam GFZ German Research Center for Geosciences; Carl von Ossietzky Universitat Oldenburg	Wilkes, H (corresponding author), Carl von Ossietzky Univ Oldenburg, Inst Chem & Biol Marine Environm ICBM, D-26111 Oldenburg, Germany.	heinz.wilkes@uni-oldenburg.de		Morris, Brandon/0000-0003-4467-1570	Dow Microbial Control	Dow Microbial Control	This research project was supported by funding from Dow Microbial Control. We are grateful for the excellent collaboration with Rohol-Aufsuchungs Aktiengesellschaft (RAG), who provided field operations data and access to the site. We thank two anonymous reviewers for their constructive comments, which helped to improve the manuscript. We would also like to acknowledge technical support provided b…		56	8	8	0	27	PERGAMON-ELSEVIER SCIENCE LTD	OXFORD	THE BOULEVARD, LANGFORD LANE, KIDLINGTON, OXFORD OX5 1GB, ENGLAND	0146-6380			ORG GEOCHEM	Org. Geochem.	JUN	2017	108
J	Li, QX; Kang, CB; Wang, H; Liu, CD; Zhang, CK				Li, QX; Kang, CB; Wang, H; Liu, CD; Zhang, CK			Application of microbial enhanced oil recovery technique to Daqing Oilfield	BIOCHEMICAL ENGINEERING JOURNAL			English	Article; Proceedings Paper	7th Young Asian Biochemical Engineers Community Symposium	OCT 28-30, 2001	E CHINA UNIV SCI & TECHNOL, SHANGHAI, PEOPLES R CHINA	State Key Lab Bioreactor Engn	E CHINA UNIV SCI & TECHNOL	microbial enhanced oil recovery; reducing crude oil viscosity; Pseudomonas		Pseudomonas aeruginosa (P-1) and its metabolic products (PIMP) of 10% could enhance the oil recovery in the model reservoir by 11.2% and also decrease injection pressure by 40.1%. Further, PIMP (10%) could reduce the crude oil viscosity by 38.5%. In the pilot tests, about 80% of wells used showed a significant increase in crude oil production after PIMP injection and shut-in for about 1 month. Th…	Shandong Univ, State Key Lab Microbial Technol, Jinan 250100, Peoples R China; Daqing Petr Inst, Dept Petr Engn, Anda 151400, Peoples R China	Shandong University; Northeast Petroleum University	Li, QX (corresponding author), Shandong Univ, State Key Lab Microbial Technol, Jinan 250100, Peoples R China.		Kang, Congbao/AAP-7572-2020	Kang, Congbao/0000-0002-9886-9374					5	53	59	0	6	ELSEVIER SCIENCE SA	LAUSANNE	PO BOX 564, 1001 LAUSANNE, SWITZERLAND	1369-703X			BIOCHEM ENG J	Biochem. Eng. J.	SEP	2002	11	2-3
J	Wei, YF; Wang, L; Xia, ZY; Gou, M; Sun, ZY; Lv, WF; Tang, YQ				Wei, Yan-Feng; Wang, Lu; Xia, Zi-Yuan; Gou, Min; Sun, Zhao-Yong; Lv, Wei-Feng; Tang, Yue-Qin			Microbial communities in crude oil phase and filter-graded aqueous phase from a Daqing oilfield after polymer flooding	JOURNAL OF APPLIED MICROBIOLOGY			English	Article						16S rRNA gene sequencing; IMEOR; oil reservoir; polymer flooding; ultra-small bacteria	NUTRIENT RESUSCITATION; CELL-SIZE; DIVERSITY; PETROLEUM; RESERVOIR; BACTERIA; BIODEGRADATION; RNA; BIOREMEDIATION; MICROORGANISMS	Aims The aim was to characterize indigenous micro-organisms in oil reservoirs after polymer flooding (RAPF). Methods The microbial communities in the crude oil phase (Oil) and in the filter-graded aqueous phases Aqu0.22 (>0.22 mu m) and Aqu0.1 (0.1-0.22 mu m) were investigated by 16S rRNA gene high-throughput sequencing. Results Indigenous micro-organisms related to hydrocarbon degradation prevai…	[Wei, Yan-Feng; Xia, Zi-Yuan; Gou, Min; Sun, Zhao-Yong; Tang, Yue-Qin] Sichuan Univ, Coll Architecture & Environm, 24,South Sect 1,First Ring Rd, Chengdu 610065, Sichuan, Peoples R China; [Wang, Lu; Lv, Wei-Feng] CNPC, State Key Lab Enhanced Oil Recovery, Res Inst Petr Explorat & Dev, Beijing, Peoples R China	Sichuan University; China National Petroleum Corporation	Gou, M (corresponding author), Sichuan Univ, Coll Architecture & Environm, 24,South Sect 1,First Ring Rd, Chengdu 610065, Sichuan, Peoples R China.	goumin@scu.edu.cn		Wei, Yanfeng/0000-0002-7148-1679	Ministry of Science and Technology of China [2018YFA0902100]	Ministry of Science and Technology of China(Ministry of Science and Technology, China)	This work was supported by the Ministry of Science and Technology of China (No. 2018YFA0902100).		66	0	0	7	7	WILEY	HOBOKEN	111 RIVER ST, HOBOKEN 07030-5774, NJ USA	1364-5072	1365-2672		J APPL MICROBIOL	J. Appl. Microbiol.	AUG	2022	133	2
J	She, YH; Wu, WQ; Hang, CC; Jiang, XW; Chai, LJ; Yu, GM; Shu, FC; Wang, ZL; Su, SB; Xiang, TS; Zhang, ZZ; Hou, DJ; Zhang, F; Zheng, BW				She, Yuehui; Wu, Wenqiong; Hang, Chunchun; Jiang, Xiawei; Chai, Lujun; Yu, Gaoming; Shu, Fuchang; Wang, Zhengliang; Su, Sanbao; Xiang, Tingsheng; Zhang, Zhongzhi; Hou, DuJie; Zhang, Fan; Zheng, Beiwen			Genome sequence of Brevibacillus agri strain 5-2, isolated from the formation water of petroleum reservoir	MARINE GENOMICS			English	Article						Brevibacillus agri; Formation water; Oilfield; Degrading; Comparative genomics	RNA GENES; BIODEGRADATION; ANNOTATION	Brevibacillus agri strain 5-2 was isolated from the formation water of a deep oil reservoir in Changqing Oilfield, China. This bacterium was found to have a capacity for degrading tetradecane, hexadecane and alkanesulfonate. To gain insights into its efficient metabolic pathway for degrading hydrocarbon and organosulfur compounds, here, we report the high quality draft genome of this strain. Two …	[She, Yuehui; Wu, Wenqiong; Hang, Chunchun; Shu, Fuchang; Wang, Zhengliang; Su, Sanbao; Xiang, Tingsheng] Yangtze Univ, Coll Chem & Environm Engn, Jinzhou, Peoples R China; [Jiang, Xiawei; Zheng, Beiwen] Zhejiang Univ, State Key Lab Diag & Treatment Infect Dis, Hangzhou 310003, Zhejiang, Peoples R China; [Chai, Lujun; Hou, DuJie; Zhang, Fan] China Univ Geosci, Sch Energy Resources, Key Lab Marine…	Yangtze University; Zhejiang University; China University of Geosciences; Yangtze University; China University of Petroleum	Zheng, BW (corresponding author), Zhejiang Univ, State Key Lab Diag & Treatment Infect Dis, Hangzhou 310003, Zhejiang, Peoples R China.	zhengbw@zju.edu.cn	she, yuehui/HGA-7099-2022		National Natural Science Foundation of China [81301461, 50974022, 51074029]; 863 Program of the Ministry of Science and Technology [2008AA06Z204, 2013AA064402]	National Natural Science Foundation of China(National Natural Science Foundation of China (NSFC)); 863 Program of the Ministry of Science and Technology(National High Technology Research and Development Program of China)	This study was sponsored by the National Natural Science Foundation of China (Grant No. 81301461, 50974022, and 51074029), and the 863 Program of the Ministry of Science and Technology (Grant No. 2008AA06Z204 and 2013AA064402). The authors wish to thank the technical personnel in the oil field under study for kindly collecting the samples.		21	6	6	1	27	ELSEVIER SCIENCE BV	AMSTERDAM	PO BOX 211, 1000 AE AMSTERDAM, NETHERLANDS	1874-7787	1876-7478		MAR GENOM	Mar. Genom.	DEC	2014	18		B
J	Nazina, TN; Shestakova, NM; Semenova, EM; Korshunova, AV; Kostrukova, NK; Tourova, TP; Min, L; Feng, QX; Poltaraus, AB				Nazina, Tamara N.; Shestakova, Natalya M.; Semenova, Ekaterina M.; Korshunova, Alena V.; Kostrukova, Nadezda K.; Tourova, Tatiana P.; Min, Liu; Feng, Qingxian; Poltaraus, Andrey B.			Diversity of Metabolically Active Bacteria in Water-Flooded High-Temperature Heavy oil Reservoir	FRONTIERS IN MICROBIOLOGY			English	Article						petroleum reservior; 16S rRNA gene clone library; cDNA of 16S rRNA; metebolic activity; gene alkB; near-bottom zone of injection well; biogeochemical processes and cycles	KONGDIAN PETROLEUM RESERVOIR; RIBOSOMAL-RNA; SP NOV.; MICROBIAL COMMUNITIES; GEN. NOV.; THERMOPHILIC BACTERIA; FIELD TRIAL; MICROORGANISMS; HYDROCARBON; DNA	The goal of this work was to study the overall genomic diversity of microorganisms of the Dagang high-temperature oilfield (PRC) and to characterize the metabolically active fraction of these populations. At this water-flooded oilfield, the microbial community of formation water from the near-bottom zone of an injection well where the most active microbial processes of oil degradation occur was i…	[Nazina, Tamara N.; Shestakova, Natalya M.; Semenova, Ekaterina M.; Korshunova, Alena V.; Kostrukova, Nadezda K.; Tourova, Tatiana P.] Russian Acad Sci, Winogradsky Inst Microbiol, Res Ctr Biotechnol, Lab Petr Microbiol, Moscow, Russia; [Min, Liu; Feng, Qingxian] Dagang Oil Field Grp Ltd, Tianjin, Peoples R China; [Poltaraus, Andrey B.] Russian Acad Sci, Engelhardt Inst Mol Biol, Moscow, Russia	Research Center of Biotechnology RAS; Russian Academy of Sciences; Russian Academy of Sciences; Engelhardt Institute of Molecular Biology, RAS	Nazina, TN (corresponding author), Russian Acad Sci, Winogradsky Inst Microbiol, Res Ctr Biotechnol, Lab Petr Microbiol, Moscow, Russia.	nazina@inmi.ru	Semenova, Ekaterina M/Q-7978-2018; Nazina, Tamara N/Q-2965-2016	Nazina, Tamara N/0000-0002-6586-2467; Semenova, Ekaterina/0000-0001-5299-7656	China National Petroleum Corporation (CNPC) [DFT04-122-IM-18-20RU]; Russian Academy of Sciences; Russian Science Foundation [16-14-00028]	China National Petroleum Corporation (CNPC); Russian Academy of Sciences(Russian Academy of Sciences); Russian Science Foundation(Russian Science Foundation (RSF))	Ecological studies on the Dagang oilfield were supported by China National Petroleum Corporation (CNPC, grant DFT04-122-IM-18-20RU), molecular study was supported by the Russian Academy of Sciences (Program "Molecular and Cellular Biology"), summarizing of the results and writing of the article were supported by Russian Science Foundation (grant 16-14-00028).		71	33	37	3	43	FRONTIERS MEDIA SA	LAUSANNE	AVENUE DU TRIBUNAL FEDERAL 34, LAUSANNE, CH-1015, SWITZERLAND	1664-302X			FRONT MICROBIOL	Front. Microbiol.	APR 25	2017	8
J	Salgar-Chaparro, SJ; Machuca, LL				Salgar-Chaparro, Silvia J.; Machuca, Laura L.			Complementary DNA/RNA-Based Profiling: Characterization of Corrosive Microbial Communities and Their Functional Profiles in an Oil Production Facility	FRONTIERS IN MICROBIOLOGY			English	Article						DNA; RNA; 16S rRNA gene; oil production; produced water; injection water; microbiologically influenced corrosion (MIC)	SULFATE-REDUCING BACTERIA; CARBON-STEEL; EXTRACELLULAR DNA; RNA; BIOFILMS; BIOCORROSION; DEPOSIT; SAMPLES; FOREST; IRON	DNA and RNA-based sequencing of the 16S rRNA gene and transcripts were used to assess the phylogenetic diversity of microbial communities at assets experiencing corrosion in an oil production facility. The complementary methodological approach, coupled with extensive bioinformatics analysis, allowed to visualize differences between the total and potentially active communities present in several l…	[Salgar-Chaparro, Silvia J.; Machuca, Laura L.] Curtin Univ, Curtin Corros Ctr, WA Sch Mines Minerals Energy & Chem Engn, Perth, WA, Australia	Curtin University	Machuca, LL (corresponding author), Curtin Univ, Curtin Corros Ctr, WA Sch Mines Minerals Energy & Chem Engn, Perth, WA, Australia.	l.machuca2@curtin.edu.au	Suarez, Laura Lizeth L Machuca/I-6283-2018	Suarez, Laura Lizeth L Machuca/0000-0002-9590-5421; Salgar Chaparro, Silvia Juliana/0000-0002-7437-9725	Australian Government; Government of Western Australia	Australian Government(Australian GovernmentCGIAR); Government of Western Australia	We acknowledge the support of the resources provided by the Pawsey Supercomputing Centre with funding from the Australian Government and the Government of Western Australia. We gratefully thank Prof. Dr. Rolf Daniel and Dr. Dominik Schneider from the Department of Genomic and Applied Microbiology and Gottingen Genomics Laboratory (Germany) for their technical support with bioinformatics analysis.		102	12	12	0	7	FRONTIERS MEDIA SA	LAUSANNE	AVENUE DU TRIBUNAL FEDERAL 34, LAUSANNE, CH-1015, SWITZERLAND	1664-302X			FRONT MICROBIOL	Front. Microbiol.	NOV 7	2019	10
J	Liu, YJ; Chen, YP; Jin, PK; Wang, XC				Liu, Y. J.; Chen, Y. P.; Jin, P. K.; Wang, X. C.			Bacterial communities in a crude oil gathering and transferring system (China)	ANAEROBE			English	Article						Bacterial community; Oil gathering and transferring system; 16S rRNA; Crude oil; Oil field production water	SULFATE-REDUCING BACTERIA; 16S RIBOSOMAL-RNA; GRADIENT GEL-ELECTROPHORESIS; CONTINENTAL HIGH-TEMPERATURE; DEEP SUBSURFACE; MOLECULAR CHARACTERIZATION; MICROBIAL COMMUNITIES; PETROLEUM RESERVOIRS; POPULATIONS; SAMPLES	Bacterial communities in crude oil and oil field production water samples from an oil gathering and transferring system in Changqing Oil field in China were investigated by 16S rRNA denaturing gradient gel electrophoresis (DGGE) analysis followed by gene cloning and sequencing. DGGE profiles showed that bacterial communities are far more rich in the water samples than that in the crude oil sample…	[Liu, Y. J.; Jin, P. K.; Wang, X. C.] Xian Univ Architecture & Technol, Minist Educ, Key Lab NW Water Resource Ecol & Environm, Xian 710055, Peoples R China; [Liu, Y. J.] UFZ Helmholtz Ctr Environm Res, Helmholtz Ctr Environm Res, Dept Bioremediat, D-04318 Leipzig, Germany; [Jin, P. K.] Chinese Acad Sci, Inst Earth Environm, Xian 710075, Peoples R China	Xi'an University of Architecture & Technology; Helmholtz Association; Helmholtz Center for Environmental Research (UFZ); Chinese Academy of Sciences; Institute of Earth Environment, CAS	Liu, YJ (corresponding author), Xian Univ Architecture & Technol, Minist Educ, Key Lab NW Water Resource Ecol & Environm, Xian 710055, Peoples R China.	liuyongjun@xauat.edu.cn		Wang, Xiaochang/0000-0003-1320-6326	National Natural Science Foundation of China (NSFC) [50838005]; Foundation of Educational Department of Shaanxi Province [06JK267]; Science and Technology Program of Xi'an city [YF07196]	National Natural Science Foundation of China (NSFC)(National Natural Science Foundation of China (NSFC)); Foundation of Educational Department of Shaanxi Province; Science and Technology Program of Xi'an city	The authors would like to thank Dr. M. Nikolausz (Department of Bioremediation, Helmholtz Centre for Environmental Research-UFZ) for assistance in microbial identification methods. The study is supported by the Key Project from National Natural Science Foundation of China (NSFC, Grant No. 50838005) and the Foundation of Educational Department of Shaanxi Province (06JK267) and the Science and Tech…		30	21	23	2	17	ELSEVIER SCI LTD	OXFORD	THE BOULEVARD, LANGFORD LANE, KIDLINGTON, OXFORD OX5 1GB, OXON, ENGLAND	1075-9964			ANAEROBE	Anaerobe	OCT	2009	15	5
J	dos Santos, JC; Lopes, DRG; Da Silva, JD; De Oliveira, MD; Dias, RS; Lima, HS; De Sousa, MP; De Paula, SO; da Silva, CC				dos Santos, Josenilda Carlos; Gomes Lopes, Deborah Romaskevis; Da Silva, Jessica Duarte; De Oliveira, Michelle Dias; Dias, Roberto Sousa; Lima, Helena Santiago; De Sousa, Maira Paula; De Paula, Sergio Oliveira; da Silva, Cynthia Canedo			Diversity of sulfate-reducing prokaryotes in petroleum production water and oil samples	INTERNATIONAL BIODETERIORATION & BIODEGRADATION			English	Article						Biocorrosion; Biosourcing; Functional prediction; 16S rRNA; Petroleum reservoir	16S RIBOSOMAL-RNA; MICROBIAL DIVERSITY; RESERVOIRS; CORROSION; COMMUNITIES; BACTERIA; NITRATE	Microorganisms from oil reservoirs are associated with negative impacts on the oilfield, such as oil biodeterioration and biocorrosion of steel structures used for exploration, transportation and storage. The objectives of this study were to analyze the taxonomic and functional diversity in the production water and oil of two oil reservoirs, with emphasis on H2S producing bacteria. Total DNA from…	[dos Santos, Josenilda Carlos; Gomes Lopes, Deborah Romaskevis; Da Silva, Jessica Duarte; Lima, Helena Santiago; da Silva, Cynthia Canedo] Univ Fed Vicosa, Dept Microbiol, Vicosa, MG, Brazil; [De Oliveira, Michelle Dias; Dias, Roberto Sousa; De Paula, Sergio Oliveira] Univ Fed Vicosa, Dept Gen Biol, Vicosa, MG, Brazil; [De Sousa, Maira Paula] Petrobras SA, Petrobras Res & Dev Ctr CENPES, Rio De J…	Universidade Federal de Vicosa; Universidade Federal de Vicosa; Petrobras	da Silva, CC (corresponding author), Lab Microbiol Ambiental Aplicada, Av Peter Henry Rolfs S-N,Campus Univ, BR-36570900 Vicosa, MG, Brazil.	jcarsan.ufrb@gmail.com; deborah_romaskevis@yahoo.com.br; jessica.duart.s@gmail.com; midioli@yahoo.com.br; rosousa318@gmail.com; hsantiagolima@gmail.com; mpsousa@petrobras.com.br; depaula@ufv.br; ccanedo@ufv.br			Petrobras, Brazil [5850.0107013.18.9]; Fundacao de Amparo a Pesquisa de Minas Gerais, FAPEMIG, Brazil; Conselho Nacional de Desenvolvimento Cientifico e Tecnologico, CNPq, Brazil; Coordenacao de Aperfeicoamento de Pessoal de Nivel Superior, CAPES, Brazil	Petrobras, Brazil; Fundacao de Amparo a Pesquisa de Minas Gerais, FAPEMIG, Brazil(Fundacao de Amparo a Pesquisa do Estado de Minas Gerais (FAPEMIG)); Conselho Nacional de Desenvolvimento Cientifico e Tecnologico, CNPq, Brazil(Conselho Nacional de Desenvolvimento Cientifico e Tecnologico (CNPQ)); Coordenacao de Aperfeicoamento de Pessoal de Nivel Superior, CAPES, Brazil(Coordenacao de Aperfeicoame…	The authors are grateful Petrobras, Brazil (grant number 5850.0107013.18.9); Fundacao de Amparo a Pesquisa de Minas Gerais, FAPEMIG, Brazil; Conselho Nacional de Desenvolvimento Cientifico e Tecnologico, CNPq, Brazil and Coordenacao de Aperfeicoamento de Pessoal de Nivel Superior, CAPES, Brazil for the granting of scholarships and for the financial support.		35	8	8	0	19	ELSEVIER SCI LTD	OXFORD	THE BOULEVARD, LANGFORD LANE, KIDLINGTON, OXFORD OX5 1GB, OXON, ENGLAND	0964-8305	1879-0208		INT BIODETER BIODEGR	Int. Biodeterior. Biodegrad.	JUL	2020	151
J	Elumalai, P; Parthipan, P; Narenkumar, J; Anandakumar, B; Madhavan, J; Oh, BT; Rajasekar, A				Elumalai, Punniyakotti; Parthipan, Punniyakotti; Narenkumar, Jayaraman; Anandakumar, Balakrishnan; Madhavan, Jagannathan; Oh, Byung-Taek; Rajasekar, Aruliah			Role of thermophilic bacteria (Bacillus and Geobacillus) on crude oil degradation and biocorrosion in oil reservoir environment	3 BIOTECH			English	Article						Biocorrosion; Biodegradation; Carbon steel; Oil reservoir; Thermophilic bacteria	MICROBIOLOGICALLY INFLUENCED CORROSION; CARBON-STEEL; HYDROCARBON BIODEGRADATION; PETROLEUM-HYDROCARBONS; MICROBIAL COMMUNITIES; MILD-STEEL; INHIBITOR; BIOFILMS; SUBTILIS; STEAROTHERMOPHILUS	Thermophilic bacterial communities generate thick biofilm on carbon steel API 5LX and produce extracellular metabolic products to accelerate the corrosion process in oil reservoirs. In the present study, nine thermophilic biocorrosive bacterial strains belonging to Bacillus and Geobacillus were isolated from the crude oil and produced water sample, and identified using 16S rRNA gene sequencing. T…	[Elumalai, Punniyakotti; Oh, Byung-Taek] Chonbuk Natl Univ, Coll Environm & Bioresource Sci, Adv Inst Environm & Biosci, Div Biotechnol, Iksan 54596, Jeonbuk, South Korea; [Parthipan, Punniyakotti] Pondicherry Univ, Ctr Nanosci & Technol, Electromat Res Lab, Pondicherry 605014, India; [Narenkumar, Jayaraman; Rajasekar, Aruliah] Thiruvalluvar Univ, Dept Biotechnol, Environm Mol Microbiol Res Lab, …	Jeonbuk National University; Pondicherry University; Thiruvalluvar University; Indira Gandhi Centre for Atomic Research (IGCAR); Thiruvalluvar University	Oh, BT (corresponding author), Chonbuk Natl Univ, Coll Environm & Bioresource Sci, Adv Inst Environm & Biosci, Div Biotechnol, Iksan 54596, Jeonbuk, South Korea.; Rajasekar, A (corresponding author), Thiruvalluvar Univ, Dept Biotechnol, Environm Mol Microbiol Res Lab, Vellore 632115, Tamil Nadu, India.	btoh@jbnu.ac.kr; rajasekargood@gmail.com	Aruliah, Rajasekar/E-4568-2015; Jagannathan, Madhavan/D-8563-2018; Punniyakotti, Parthipan/AAZ-3749-2021	Aruliah, Rajasekar/0000-0001-5324-3290; Jagannathan, Madhavan/0000-0003-4005-4604; Parthipan, Punniyakotti/0000-0002-6431-7766	Department of Biotechnology, Government of India [BT/RLF/Re-entry/17/2012]; Science and Engineering Research Board, Department of Science and Technology (DST-SERB), Government of India [EEQ/2016/000449]; University Grants Commission [MRP-MAJOR-MICRO-2013-31825]	Department of Biotechnology, Government of India(Department of Biotechnology (DBT) India); Science and Engineering Research Board, Department of Science and Technology (DST-SERB), Government of India; University Grants Commission(University Grants Commission, India)	This study was funded by Department of Biotechnology, Government of India (BT/RLF/Re-entry/17/2012), Science and Engineering Research Board, Department of Science and Technology (DST-SERB), Government of India (EEQ/2016/000449) and University Grants Commission (MRP-MAJOR-MICRO-2013-31825).		68	26	27	5	35	SPRINGER HEIDELBERG	HEIDELBERG	TIERGARTENSTRASSE 17, D-69121 HEIDELBERG, GERMANY	2190-572X	2190-5738		3 BIOTECH	3 Biotech	MAR	2019	9	3
J	Deng, SY; Wang, B; Su, SB; Zeng, H; Chen, R; Ma, HF; Hu, YJ; Zheng, AY; Shu, CC; Zou, J; Li, Y; Zhu, H; Sun, SS; She, YH; Zhang, F				Deng, Shuyuan; Wang, Bo; Su, Sanbao; Zeng, Hao; Chen, Rui; Ma, Hongfei; Hu, Yujie; Zheng, Anying; Shu, Chuangchuang; Zou, Jing; Li, Yang; Zhu, He; Sun, Shanshan; She, Yuehui; Zhang, Fan			Microbial community diversity and potential bioremediation of drill cuttings in two oil reservoirs	PETROLEUM SCIENCE AND TECHNOLOGY			English	Article						bioremediation; biosurfactant; degrade; drill cuttings (DCs); microbial community	CRUDE-OIL; PETROLEUM-HYDROCARBONS; GEN. NOV.; BACTERIA; BIODEGRADATION; TECHNOLOGIES; DEGRADATION; SURFACE	Drill cuttings (DCs, Table 1), which are produced during hydrocarbon drilling operation, are rock coated with drilling fluids and hydrocarbons. DCs without adequate treatment could leave behind thousands of tons of hazardous materials, resulting in a large environmental liability. In this work, seven DCs samples were collected from Tu and Qing oilfields, and microbes inhabiting the DCs were revea…	[Deng, Shuyuan; Wang, Bo; Chen, Rui; Ma, Hongfei; Zhu, He; Zhang, Fan] China Univ Geosci Beijing, Sch Energy Resources, Beijing, Peoples R China; [Su, Sanbao] Yangtze Univ, Coll Chem & Environm Engn, Jingzhou, Peoples R China; [Su, Sanbao] Sinopec Zhongyuan Oilfield, Water Serv Branch, Puyang, Peoples R China; [Zeng, Hao; Hu, Yujie; Zheng, Anying; Shu, Chuangchuang; Zou, Jing; Li, Yang; Sun, Shan…	China University of Geosciences; Yangtze University; Sinopec; Yangtze University	Zhang, F (corresponding author), China Univ Geosci Beijing, Sch Energy Resources, Beijing, Peoples R China.; She, YH (corresponding author), Yangtze Univ, Coll Petr Engn, Wuhan, Peoples R China.	sheyuehui@163.com; fanzhang@cugb.edu.cn	she, yuehui/HGA-7099-2022	Deng, Shuyuan/0000-0001-6898-9888	National Natural Science Foundation of China [51774257, 51504221, 51574038, 51634008]; National Science and Technology Major Oil and Gas Special Project [2017ZX05009-004]	National Natural Science Foundation of China(National Natural Science Foundation of China (NSFC)); National Science and Technology Major Oil and Gas Special Project	This study was supported by the National Natural Science Foundation of China in the form of grants awarded to FZ (51774257, 51504221) and YS (51574038, 51634008), the National Science and Technology Major Oil and Gas Special Project in the form of a grant awarded to YS (2017ZX05009-004).		41	0	0	6	23	TAYLOR & FRANCIS INC	PHILADELPHIA	530 WALNUT STREET, STE 850, PHILADELPHIA, PA 19106 USA	1091-6466	1532-2459		PETROL SCI TECHNOL	Pet. Sci. Technol.	JUN 18	2022	40	12
J	Gao, PK; Li, Y; Tian, HM; Li, GQ; Zhao, F; Xia, WJ; Pan, XL; Gu, JD; Le, JJ; Jia, CX; Ma, T				Gao, Peike; Li, Yu; Tian, Huimei; Li, Guoqiang; Zhao, Feng; Xia, Wenjie; Pan, Xunli; Gu, Ji-Dong; Le, Jianjun; Jia, Chuanxing; Ma, Ting			Bacterial and Archaeal Community Distribution in Oilfield Water Re-injection Facilities and the Influences from Microorganisms in Injected Water	MICROBIAL ECOLOGY			English	Article						Petroleum reservoir; Microbial-enhanced oil recovery; Water re-injection facilities; Microbial community; Microbial transfer	16S RIBOSOMAL-RNA; SP NOV.; GEN. NOV.; MICROBIAL COMMUNITIES; RESERVOIR; DIVERSITY; SUCCESSION; SEQUENCES	Water flooding is widely employed for oil production worldwide. However, there has never been a systematic investigation of the microbial communities occurring in oilfield water re-injection facilities. Here, we investigated the distribution of bacterial and archaeal communities in water re-injection facilities of an oilfield, and illustrated the combined influences of environmental variation and…	[Gao, Peike; Li, Yu; Zhao, Feng; Pan, Xunli; Jia, Chuanxing] Qufu Normal Univ, Coll Life Sci, Qufu 273165, Shandong, Peoples R China; [Tian, Huimei] Shandong Agr Univ, Coll Forestry, Tai An 271018, Shandong, Peoples R China; [Li, Guoqiang; Xia, Wenjie; Ma, Ting] Nankai Univ, Coll Life Sci, Tianjin 300071, Peoples R China; [Gu, Ji-Dong] Guangdong Technion Israel Inst Technol, Environm Engn, Shanto…	Qufu Normal University; Shandong Agricultural University; Nankai University; Guangdong Technion Israel Institute of Technology; Daqing Oilfield Company Limited; Sinopec	Gao, PK (corresponding author), Qufu Normal Univ, Coll Life Sci, Qufu 273165, Shandong, Peoples R China.; Ma, T (corresponding author), Nankai Univ, Coll Life Sci, Tianjin 300071, Peoples R China.	gpkyll-001@163.com; tingma@nankai.edu.cn		tian, huimei/0000-0002-9588-2178; Zhao, Feng/0000-0002-2808-6702	Shandong Provincial Natural Science Foundation [ZR2020MC042]; National Natural Science Foundation of China [31500414, 41773080]; Shandong Jining Key Research and Development Project [2019ZDGH019]; Shandong Provincial Key Research and Development Project [2018GSF117035]; Shandong Provincial Higher Educational Science and Technology Program [J17KA112]; National Key Research and Development Project …	Shandong Provincial Natural Science Foundation(Natural Science Foundation of Shandong Province); National Natural Science Foundation of China(National Natural Science Foundation of China (NSFC)); Shandong Jining Key Research and Development Project; Shandong Provincial Key Research and Development Project; Shandong Provincial Higher Educational Science and Technology Program; National Key Researc…	This work was funded by the Shandong Provincial Natural Science Foundation (ZR2020MC042), National Natural Science Foundation of China (31500414 and 41773080), Shandong Jining Key Research and Development Project (2019ZDGH019), Shandong Provincial Key Research and Development Project (2018GSF117035), Shandong Provincial Higher Educational Science and Technology Program (J17KA112), National Key Re…		66	2	2	7	19	SPRINGER	NEW YORK	ONE NEW YORK PLAZA, SUITE 4600, NEW YORK, NY, UNITED STATES	0095-3628	1432-184X		MICROB ECOL	Microb. Ecol.	NOV	2022	84	4
J	Nie, Y; Zhao, JY; Tang, YQ; Guo, P; Yang, YF; Wu, XL; Zhao, FQ				Nie, Yong; Zhao, Jie-Yu; Tang, Yue-Qin; Guo, Peng; Yang, Yunfeng; Wu, Xiao-Lei; Zhao, Fangqing			Species Divergence vs. Functional Convergence Characterizes Crude Oil Microbial Community Assembly	FRONTIERS IN MICROBIOLOGY			English	Article						metagenome; microbial community; oil reservoirs; petroleum; methanogenesis; hydrocarbon degradation	TEMPERATURE PETROLEUM RESERVOIR; 16S RIBOSOMAL-RNA; DEEP-SUBSURFACE; BACTERIAL COMMUNITY; SIGNAL-TRANSDUCTION; BACILLUS-SUBTILIS; GENES; WATER; BIODEGRADATION; MICROORGANISMS	Oil reservoirs exhibit extreme environmental conditions such as high salinity and high temperature. Insights into microbial community assemblages in oil reservoirs and their functional potentials are important for understanding biogeochemical cycles in the subterranean biosphere. In this study, we performed shotgun metagenomic sequencing of crude oil samples from two geographically distant oil re…	[Nie, Yong; Zhao, Jie-Yu; Guo, Peng; Wu, Xiao-Lei] Peking Univ, Coll Engn, Beijing, Peoples R China; [Tang, Yue-Qin] Sichuan Univ, Coll Architecture & Environm, Chengdu, Peoples R China; [Yang, Yunfeng] Tsinghua Univ, Sch Environm, State Key Joint Lab Environm Simulat & Pollut, Beijing, Peoples R China; [Wu, Xiao-Lei] Peking Univ, Coll Engn, Inst Engn Baotou, Baotou, Peoples R China; [Zhao, Fangq…	Peking University; Sichuan University; Tsinghua University; Peking University; Chinese Academy of Sciences	Wu, XL (corresponding author), Peking Univ, Coll Engn, Beijing, Peoples R China.; Wu, XL (corresponding author), Peking Univ, Coll Engn, Inst Engn Baotou, Baotou, Peoples R China.; Zhao, FQ (corresponding author), Chinese Acad Sci, Beijing Inst Life Sci, Beijing, Peoples R China.	xiaolei_wu@pku.edu.cn; zhfq@mail.biols.ac.cn	Wu, Xiao-Lei/G-6882-2011	Wu, Xiao-Lei/0000-0002-9897-6903; Zhao, Fangqing/0000-0002-6216-1235	National Natural Science Foundation of China [31225001, 31300108]; National High Technology Research and Development Program of China ("863"Program) [2012AA02A703]; National Basic Research Program of China ("973" Program) [2014CB846002]	National Natural Science Foundation of China(National Natural Science Foundation of China (NSFC)); National High Technology Research and Development Program of China ("863"Program)(National High Technology Research and Development Program of China); National Basic Research Program of China ("973" Program)(National Basic Research Program of China)	This study was supported by the National Natural Science Foundation of China (31225001, 31300108), the National High Technology Research and Development Program of China ("863"Program: 2012AA02A703) and the National Basic Research Program of China ("973" Program, 2014CB846002).		56	16	16	2	53	FRONTIERS MEDIA SA	LAUSANNE	PO BOX 110, EPFL INNOVATION PARK, BUILDING I, LAUSANNE, 1015, SWITZERLAND	1664-302X			FRONT MICROBIOL	Front. Microbiol.	AUG 12	2016	7
J	Liu, HJ; Yao, J; Yuan, ZM; Chen, HL; Wang, F; Masakorala, K; Choi, MMF				Liu, Haijun; Yao, Jun; Yuan, Zhimin; Chen, Huilun; Wang, Fei; Masakorala, Kanaji; Choi, Martin M. F.			Degradation of hydrocarbons by indigenous microbial communities from two adjacent oil production wells in one block	ENERGY SOURCES PART A-RECOVERY UTILIZATION AND ENVIRONMENTAL EFFECTS			English	Article						Degradation; indigenous microorganism; MEOR; microbial diversity; oil production water	CRUDE-OIL; BIOSURFACTANT PRODUCTION; CONTAMINATION GRADIENT; LAKE SEDIMENT; SP NOV.; DIVERSITY; BACTERIA; RECOVERY; SOIL; STRAINS	Aerobic acclimatization cultures of oil production water from two adjacent oil production wells (Xi15-14 and Xi51-5) in one block of Dagang oilfield were generated depending on crude oil as the sole carbon source and energy. Both cultures revealed a high degrading efficiency for a wide range of hydrocarbons, but degradation trend were striking different, and surface tension of two phases of oil a…	[Liu, Haijun; Masakorala, Kanaji] Anqing Normal Univ, Sch Resources & Environm, Anqing, Peoples R China; [Liu, Haijun; Yao, Jun; Yuan, Zhimin; Chen, Huilun; Wang, Fei] Univ Sci & Technol Beijing, Sch Energy & Environm Engn, Beijing, Peoples R China; [Yao, Jun] China Univ Geosci, Sch Water Resource & Environm Engn, Beijing, Peoples R China; [Masakorala, Kanaji] Univ Ruhuna, Dept Bot, Fac Sci, Mata…	Anqing Normal University; University of Science & Technology Beijing; China University of Geosciences; University Ruhuna; Hong Kong Baptist University	Yao, J (corresponding author), Univ Sci & Technol Beijing, Sch Energy & Environm Engn, Beijing, Peoples R China.	yaojun@ustb.edu.cn	chen, hui/HDO-2955-2022		International Joint Key Project from the Chinese Ministry of Science and Technology [2010DFB23160]; National Natural Science Foundation of China [41430106, 41273092, 41103060, 41103058, 41603083]; Public welfare project of the Chinese Ministry of Environmental Protection [201409042, 201509049]; Natural Science Foundation of the Higher Education Institutions of Anhui Province [KJ2016A432]	International Joint Key Project from the Chinese Ministry of Science and Technology; National Natural Science Foundation of China(National Natural Science Foundation of China (NSFC)); Public welfare project of the Chinese Ministry of Environmental Protection; Natural Science Foundation of the Higher Education Institutions of Anhui Province	This work is supported in part by grants from the International Joint Key Project from the Chinese Ministry of Science and Technology (2010DFB23160), the National Natural Science Foundation of China (41430106, 41273092, 41103060, 41103058 and 41603083), and Public welfare project of the Chinese Ministry of Environmental Protection (201409042, 201509049), and Key Project Supported by the Natural S…		43	1	2	1	17	TAYLOR & FRANCIS INC	PHILADELPHIA	530 WALNUT STREET, STE 850, PHILADELPHIA, PA 19106 USA	1556-7036	1556-7230		ENERG SOURCE PART A	Energy Sources Part A-Recovery Util. Environ. Eff.		2016	38	23
J	Bhagobaty, RK				Bhagobaty, Ranjan Kumar			Hydrocarbon-utilizing bacteria of natural crude oil seepages, Digboi oilfield, Northeastern region of India	JOURNAL OF SEDIMENTARY ENVIRONMENTS			English	Article						Hydrocarbon-utilizing bacteria; Crude oil seepages; Digboi oilfield; Simple culture technique; Open access bacterial identification software; Assam	SP NOV.; BURKHOLDERIA-THAILANDENSIS; SP. NOV.; PETROLEUM; PSEUDOMALLEI	The Digboi oilfield located in the State of Assam, in the northeastern region of India, is one of the world's oldest producing oilfields. Commercial oil production from this oilfield started with the drilling of Discovery Well No 1, in 1889. Natural seepages of hydrocarbons (crude oil) in the field are common and were responsible for its initial discovery. In the present investigation, the cultur…	[Bhagobaty, Ranjan Kumar] Oil India Ltd, R&D Dept, Petr Biotechnol Ctr Jaivalaya, Duliajan 786602, Assam, India		Bhagobaty, RK (corresponding author), Oil India Ltd, R&D Dept, Petr Biotechnol Ctr Jaivalaya, Duliajan 786602, Assam, India.	ranjan_bhagobaty@oilindia.in							56	5	5	0	1	SPRINGER HEIDELBERG	HEIDELBERG	TIERGARTENSTRASSE 17, D-69121 HEIDELBERG, GERMANY	2662-5571	2447-9462		J SEDIMENT ENVIRON	J. Sediment. Environ.	JUN	2020	5	2
J	Liu, RY; Li, D; Gao, YX; Zhang, Y; Wu, S; Ding, R; Hesham, AEL; Yang, M				Liu, Ruyin; Li, Dong; Gao, Yingxin; Zhang, Yu; Wu, Song; Ding, Ran; Hesham, Abd El-Latif; Yang, Min			Microbial diversity in the anaerobic tank of a full-scale produced water treatment plant	PROCESS BIOCHEMISTRY			English	Article						Produced water; Anaerobic tank; Biofilm; Archaea; Bacteria; Community	16S RIBOSOMAL-RNA; GRADIENT GEL-ELECTROPHORESIS; CRUDE-OIL BIODEGRADATION; DENITRIFYING BACTERIA; PETROLEUM RESERVOIRS; WASTE-WATER; METHANOGENESIS; MICROORGANISMS; GENES; IDENTIFICATION	Microbial characteristics in the anaerobic tank of a full-scale produced water treatment plant capable of anaerobic hydrocarbon removal were analyzed and compared to those in the influent produced water using cultivation-independent molecular methods. Clones related to methanogens including the methylotrophic Methanomethylovorans thermophila and hydrogen- and the formate-utilizing Methanolinea ta…	[Liu, Ruyin; Li, Dong; Gao, Yingxin; Zhang, Yu; Ding, Ran; Hesham, Abd El-Latif; Yang, Min] Chinese Acad Sci, Ecoenvironm Sci Res Ctr, State Key Lab Environm Aquat Chem, Beijing 100085, Peoples R China; [Wu, Song] PetroChina, Jidong Oilfield, Jidong, Peoples R China; [Hesham, Abd El-Latif] Assiut Univ, Fac Agr, Dept Genet, Assiut, Egypt	Chinese Academy of Sciences; Research Center for Eco-Environmental Sciences (RCEES); China National Petroleum Corporation; Egyptian Knowledge Bank (EKB); Assiut University	Yang, M (corresponding author), Chinese Acad Sci, Ecoenvironm Sci Res Ctr, State Key Lab Environm Aquat Chem, POB 2871, Beijing 100085, Peoples R China.	yangmin@rcees.ac.cn	Li, Dong/I-1895-2012; hesham, Abd El-Latif/J-3283-2019	hesham, Abd El-Latif/0000-0002-0614-7658	National Natural Science Foundation of China [50525824, 50921064]; PetroChina Innovation Foundation [2009D-5006-02-03]	National Natural Science Foundation of China(National Natural Science Foundation of China (NSFC)); PetroChina Innovation Foundation	This work was supported by the National Natural Science Foundation of China (Contract Nos. 50525824, 50921064) and PetroChina Innovation Foundation (No. 2009D-5006-02-03).		39	22	23	0	43	ELSEVIER SCI LTD	OXFORD	THE BOULEVARD, LANGFORD LANE, KIDLINGTON, OXFORD OX5 1GB, OXON, ENGLAND	1359-5113	1873-3298		PROCESS BIOCHEM	Process Biochem.	MAY	2010	45	5
J	She, YH; Zhang, F; Xia, JJ; Kong, SQ; Wang, ZL; Shu, FC; Hu, JM				She, Yue-Hui; Zhang, Fan; Xia, Jing-Jing; Kong, Shu-Qiong; Wang, Zheng-Liang; Shu, Fu-Chang; Hu, Ji-Ming			Investigation of Biosurfactant-Producing Indigenous Microorganisms that Enhance Residue Oil Recovery in an Oil Reservoir After Polymer Flooding	APPLIED BIOCHEMISTRY AND BIOTECHNOLOGY			English	Article						Polymer flooding; Indigenous microorganisms; Biosurfactant; Crude oil degradation; Microbial-enhanced oil recovery	PETROLEUM RESERVOIRS; DEEP SUBSURFACE	Three biosurfactant-producing indigenous microorganisms (XDS1, XDS2, XDS3) were isolated from a petroleum reservoir in the Daqing Oilfield (China) after polymer flooding. Their metabolic, biochemical, and oil-degradation characteristics, as well as their oil displacement in the core were studied. These indigenous microorganisms were identified as short rod bacillus bacteria with white color, roun…	[She, Yue-Hui; Hu, Ji-Ming] Wuhan Univ, Coll Chem & Mol Sci, Wuhan 430072, Peoples R China; [She, Yue-Hui; Xia, Jing-Jing; Kong, Shu-Qiong; Wang, Zheng-Liang; Shu, Fu-Chang] Yangtze Univ, Coll Chem & Environm Engn, Jinzhou 434023, Peoples R China; [Zhang, Fan] China Univ Geosci Beijing, Sch Energy Resources, Beijing 100083, Peoples R China	Wuhan University; Yangtze University; China University of Geosciences	Hu, JM (corresponding author), Wuhan Univ, Coll Chem & Mol Sci, Wuhan 430072, Peoples R China.	sheyuehui@yahoo.com.cn; jmhu@whu.edu.cn	she, yuehui/HGA-7099-2022	Zhang, Fan/0000-0001-8668-0235	Ministry of Science and Technology [2008AA06Z204]; National Natural Science Foundation in P.R. China [50974022]	Ministry of Science and Technology(Ministry of Science, ICT & Future Planning, Republic of Korea); National Natural Science Foundation in P.R. China(National Natural Science Foundation of China (NSFC))	We gratefully acknowledge the support of the 863 Program (2008AA06Z204) of the Ministry of Science and Technology and the National Natural Science Foundation (Grant No. 50974022) in P.R. China.		20	47	52	2	34	HUMANA PRESS INC	TOTOWA	999 RIVERVIEW DRIVE SUITE 208, TOTOWA, NJ 07512 USA	0273-2289	1559-0291		APPL BIOCHEM BIOTECH	Appl. Biochem. Biotechnol.	JAN	2011	163	2
J	Song, JY; Huo, ZP; Fu, G; Hu, M; Sun, TW; Liu, Z; Wang, W; Liu, LF				Song, Jianyang; Huo, Zhipeng; Fu, Guang; Hu, Ming; Sun, Tongwen; Liu, Zhe; Wang, Wei; Liu, Luofu			Petroleum migration and accumulation in the Liuchu area of Raoyang Sag, Bohai Bay Basin, China	JOURNAL OF PETROLEUM SCIENCE AND ENGINEERING			English	Article						Biomarkers; Migration and accumulation modeling; Migration direction; Physical characteristics of crude oil; Vertical migration	MALING OIL-FIELD; HYDROCARBON MIGRATION; MOLECULAR-PARAMETERS; DONGYING DEPRESSION; NITROGEN-COMPOUNDS; FLUVIAL DEPOSITS; TOARCIAN SHALES; SOURCE ROCKS; ORDOS BASIN; PARIS BASIN	This study focused on vertical migration of petroleum in the Liuchu area, China. The physical properties of petroleum and changes in the geochemical characteristics of the study area were also investigated. Biomarkers such as, nitrogen compounds, n-alkanes, triterpenoids, steroids, hopanes, and cholestanes were analyzed in this regard. Petro-physical characteristics, such as, density, viscosity, …	[Song, Jianyang; Liu, Luofu] China Univ Petr, State Key Lab Petr Resources & Prospecting, Beijing 102249, Peoples R China; [Song, Jianyang; Liu, Luofu] China Univ Petr, Coll Geosci, Beijing 102249, Peoples R China; [Huo, Zhipeng] China Univ Geosci, Energy Resources Inst, Beijing 100083, Peoples R China; [Fu, Guang] Northeast Petr Univ, Sch Earth Sci, Daqing 163318, Heilongjiang, Peoples R China; …	China University of Petroleum; China University of Petroleum; China University of Geosciences; Northeast Petroleum University; Guangdong University of Petrochemical Technology	Liu, LF (corresponding author), China Univ Petr, State Key Lab Petr Resources & Prospecting, Beijing 102249, Peoples R China.	liulf@cup.edu.cn	Liu, Zhe/ABH-3028-2021; Alkhidir, / Khalid Elyas Mohamed Elameen/N-2311-2019	Liu, Zhe/0000-0002-3867-6642; Alkhidir, / Khalid Elyas Mohamed Elameen/0000-0001-5777-0602	Northeast Petroleum University [2014-0018963-HBYT-0003277]; Courtesy exploration and Research Institute of Huabei Oilfield, PetroChina Co., Ltd [2014-0018963-HBYT-0003277]	Northeast Petroleum University; Courtesy exploration and Research Institute of Huabei Oilfield, PetroChina Co., Ltd	We thank the Northeast Petroleum University and the Courtesy exploration and Research Institute of Huabei Oilfield subsidiary, PetroChina Co., Ltd for assistance and their financial aid in the Jizhong richoil sag carrier beds project 2014-0018963-HBYT-0003277. Samples and relevant data were provided by the Courtesy exploration and Research Institute of Huabei Oilfied subsidiary, Petro-China Co., …		66	4	4	1	13	ELSEVIER	AMSTERDAM	RADARWEG 29a, 1043 NX AMSTERDAM, NETHERLANDS	0920-4105	1873-4715		J PETROL SCI ENG	J. Pet. Sci. Eng.	SEP	2020	192
J	Wu, ML; Liu, ZL; Gao, H; Gao, JH; Xu, YR; Ou, YW				Wu, Manli; Liu, Zeliang; Gao, Huan; Gao, Jinghua; Xu, Yinrui; Ou, Yawen			Assessment of bioremediation potential of petroleum-contaminated soils from the shanbei oilfield of China revealed by qPCR and high throughput sequencing	CHEMOSPHERE			English	Article						Handling Editor; Chang -Ping Yu; Crude oil spills; Soil pollution; Bioremediation potential; qPCR; High throughput sequencing	MICROBIAL COMMUNITY; ENHANCED BIOREMEDIATION; GENES; BIOAUGMENTATION; SPILLS; QUANTIFICATION; BIOSTIMULATION; HYDROCARBONS; DEGRADATION; BACTERIA	With the crude oil exploration activities in the Shanbei oilfield of China, the risk of soil contamination with crude oil spills has become a major concern. This study aimed at assessing the bioremediation potential of the petroleum polluted soils by investigating the expression of key functional genes decoding alkane and aromatic component degradation using an array of primers and real-time quan…	[Wu, Manli; Liu, Zeliang; Gao, Huan; Gao, Jinghua; Xu, Yinrui; Ou, Yawen] Xian Univ Architecture & Technol, Shaanxi Key Lab Environm Engn, Xian 710055, Peoples R China; [Wu, Manli; Liu, Zeliang; Gao, Huan; Gao, Jinghua; Xu, Yinrui; Ou, Yawen] Xian Univ Architecture & Technol, Key Lab Northwest Water Resource Environment & Eco, MOE, Xian 710055, Peoples R China; [Wu, Manli; Liu, Zeliang; Gao, Huan…	Xi'an University of Architecture & Technology; Xi'an University of Architecture & Technology; Xi'an University of Architecture & Technology; Chinese Academy of Sciences; Institute of Soil Science, CAS	Wu, ML (corresponding author), Xian Univ Architecture & Technol, Shaanxi Key Lab Environm Engn, Xian 710055, Peoples R China.	wumanli1974@hotmail.com			National Natural Science Foundation of China; [52070154]; [21577109]	National Natural Science Foundation of China(National Natural Science Foundation of China (NSFC)); ;	Acknowledgements This research has been supported by the National Natural Science Foundation of China (No. 52070154) and (No. 21577109) .		56	0	0	15	15	PERGAMON-ELSEVIER SCIENCE LTD	OXFORD	THE BOULEVARD, LANGFORD LANE, KIDLINGTON, OXFORD OX5 1GB, ENGLAND	0045-6535	1879-1298		CHEMOSPHERE	Chemosphere	DEC	2022	308		3
J	Zhou, L; Hu, QQ; Lu, YW; Mbadinga, SM; Liu, YF; Li, XX; Wang, B; Lv, HM; Liu, JF; Yang, SZ; Gu, JD; Mu, BZ				Zhou, Lei; Hu, Qian-Qian; Lu, Yu-Wei; Mbadinga, Serge Maurice; Liu, Yi-Fan; Li, Xiao-Xiao; Wang, Biao; Lv, Hongmei; Liu, Jin-Feng; Yang, Shi-Zhong; Gu, Ji-Dong; Mu, Bo-Zhong			Dominant and Active Methanogens in the Production Waters From a High-Temperature Petroleum Reservoir by DNA- and RNA-Based Analysis	GEOMICROBIOLOGY JOURNAL			English	Article						Methanogen; petroleum reservoir; mcrA; RNA; methanogenesis	16S RIBOSOMAL-RNA; PHYLOGENETIC DIVERSITY; MICROBIAL COMMUNITIES; GEN. NOV.; CRUDE-OIL; ARCHAEON; METHANOSAETA; GENOME; ORDER	Methane metabolism in deep subsurface petroleum reservoirs is of paramount interest in the global biogeochemical cycle of carbon. Methanogenesis in such habitats is driven mostly by methanogens in syntrophic association with bacteria. In the present study, methanogenic communities in production water samples from six wells of a high-temperature petroleum reservoir were analyzed based on both geno…	[Zhou, Lei; Hu, Qian-Qian; Lu, Yu-Wei; Mbadinga, Serge Maurice; Liu, Yi-Fan; Li, Xiao-Xiao; Liu, Jin-Feng; Yang, Shi-Zhong; Mu, Bo-Zhong] East China Univ Sci & Technol, State Key Lab Bioreactor Engn, Shanghai, Peoples R China; [Zhou, Lei; Hu, Qian-Qian; Lu, Yu-Wei; Mbadinga, Serge Maurice; Liu, Yi-Fan; Li, Xiao-Xiao; Liu, Jin-Feng; Yang, Shi-Zhong; Mu, Bo-Zhong] East China Univ Sci & Technol, Sch…	East China University of Science & Technology; East China University of Science & Technology; Sinopec; Guangdong Technion Israel Institute of Technology; East China University of Science & Technology	Mu, BZ (corresponding author), East China Univ Sci & Technol, State Key Lab Bioreactor Engn, Shanghai, Peoples R China.; Mu, BZ (corresponding author), East China Univ Sci & Technol, Sch Chem & Mol Engn, Shanghai, Peoples R China.	bzmu@ecust.edu.cn	Mu, Bo-Zhong/F-4704-2017; Hu, Qian/GWZ-7617-2022; Mbadinga, Serge Maurice/I-3789-2017	Mu, Bo-Zhong/0000-0002-9564-4970;	National Natural Science Foundation of China [41403066]; Fundamental Research Funds for the Central Universities of China [222201414029]	National Natural Science Foundation of China(National Natural Science Foundation of China (NSFC)); Fundamental Research Funds for the Central Universities of China(Fundamental Research Funds for the Central Universities)	This work was supported by the National Natural Science Foundation of China [No. 41403066], and the Fundamental Research Funds for the Central Universities of China [No. 222201414029].		53	1	1	1	19	TAYLOR & FRANCIS INC	PHILADELPHIA	530 WALNUT STREET, STE 850, PHILADELPHIA, PA 19106 USA	0149-0451	1521-0529		GEOMICROBIOL J	Geomicrobiol. J.	MAR 1	2021	38	3
J	Tuccar, T; Ilhan-Sungur, E; Muyzer, G				Tuccar, Tugce; Ilhan-Sungur, Esra; Muyzer, Gerard			Bacterial Community Composition in Produced Water of Diyarbakir Oil Fields in Turkey Bacterial communities in produced waters of south-eastern Turkey reported in detail for the first time	JOHNSON MATTHEY TECHNOLOGY REVIEW			English	Article							GRADIENT GEL-ELECTROPHORESIS; SP-NOV.; PHYLOGENETIC DIVERSITY; MICROBIAL COMMUNITIES; PETROLEUM RESERVOIR; DEGRADING BACTERIA; REDUCING BACTERIA; CRUDE-OIL; GEN. NOV.; MICROORGANISMS	Oil fields harbour a wide variety of microorganisms with different metabolic capabilities. To examine the microbial ecology of petroleum reservoirs, a molecular-based approach was used to assess the composition of bacterial communities in produced water of Diyarbakir oil fields in Turkey. Denaturing gradient gel electrophoresis (DGGE) of polymerase chain reaction (PCR)-amplified 16S rRNA gene fra…	[Tuccar, Tugce] Istanbul Univ, Inst Grad Studies Sci, Dept Biol, TR-34134 Istanbul, Turkey; [Ilhan-Sungur, Esra] Istanbul Univ, Fac Sci, Dept Biol, TR-34134 Istanbul, Turkey; [Muyzer, Gerard] Delft Univ Technol, Dept Biotechnol, Maasweg 9, NL-2629 HZ Delft, Netherlands; [Muyzer, Gerard] Univ Amsterdam, Inst Biodivers & Ecosyst Dynam, Dept Freshwater & Marine Microbiol, Microbial Syst Ecol, POB 94…	Istanbul University; Istanbul University; Delft University of Technology; University of Amsterdam	Tuccar, T (corresponding author), Istanbul Univ, Inst Grad Studies Sci, Dept Biol, TR-34134 Istanbul, Turkey.	tugce.tuccar1@gmail.com	Tüccar, Tuğçe/AAG-4812-2021; ILHAN-SUNGUR, Esra/AAD-1549-2020		Istanbul University [28699]; Erasmus LLP Scholarship; Scientific and Technological Research Council of Turkey (TUBITAK-BIDEB)	Istanbul University(Istanbul University); Erasmus LLP Scholarship; Scientific and Technological Research Council of Turkey (TUBITAK-BIDEB)(Turkiye Bilimsel ve Teknolojik Arastirma Kurumu (TUBITAK))	This work was supported by `Research Fund of Istanbul University' (Project number: 28699). Tugce Tuccar was awarded an Erasmus LLP Scholarship. Esra Ilhan-Sungur was awarded a Post-doctoral Research Scholarship by the Scientific and Technological Research Council of Turkey (TUBITAK-BIDEB). We thank the Turkish Petroleum Corporation for permission to collect samples, and Ender Taptik and Hasan Kay…		70	1	1	3	9	JOHNSON MATTHEY PUBL LTD CO	ROYSTON	ORCHARD RD, ROYSTON SG8 5HE, HERTFORDSHIRE, ENGLAND	2056-5135			JOHNSON MATTHEY TECH	Johns. Matthey Technol. Rev.	OCT	2020	64	4
J	Lysnes, K; Bodtker, G; Torsvik, T; Bjornestad, EO; Sunde, E				Lysnes, Kristine; Bodtker, Gunhild; Torsvik, Terje; Bjornestad, Eva O.; Sunde, Egil			Microbial response to reinjection of produced water in an oil reservoir	APPLIED MICROBIOLOGY AND BIOTECHNOLOGY			English	Article						Oil reservoir; Produced water; Reinjection; SRB; NRB; NR-SOB	GRADIENT GEL-ELECTROPHORESIS; SULFATE-REDUCING BACTERIA; TEMPERATURE PETROLEUM RESERVOIRS; 16S RIBOSOMAL-RNA; SP-NOV; THERMOPHILIC BACTERIUM; FIELD WATERS; MODEL COLUMN; NITRATE; DIVERSITY	The microbial response to produced water reinjection (PWRI) in a North Sea oil field was investigated by a combination of cultivation and culture-independent molecular phylogenetic techniques. Special emphasise was put on the relationship between sulphate-reducing bacteria (SRB) and nitrate-reducing bacteria (NRB), and results were used to evaluate the possibility of nitrate treatment as a sourin…	[Lysnes, Kristine] Univ Bergen, Dept Math, N-5020 Bergen, Norway; [Lysnes, Kristine; Torsvik, Terje] CIPR, N-5007 Bergen, Norway; [Bodtker, Gunhild] Unifob Petr, N-5007 Bergen, Norway; [Bjornestad, Eva O.; Sunde, Egil] StatoilHydro, N-4035 Stavanger, Norway	University of Bergen; University of Bergen; Equinor	Lysnes, K (corresponding author), Univ Bergen, Dept Math, Postbox 7803, N-5020 Bergen, Norway.	Kristine.Lysnes@math.uib.no			Statoil; Norwegian Research Council	Statoil; Norwegian Research Council(Research Council of NorwayEuropean Commission)	This work was supported by Statoil and the Norwegian Research Council through the Petromaks programme. The authors wish to thank Bente Edel Thorbjornsen, Nirmaladevi Sivasambu, Rikke Helen Ulvoen, Bente-Lise Polden Lillebo, and Tove Leiknes at Unifob Petroleum, Section for Microbiology, University of Bergen, for technical assistance.		40	25	27	4	24	SPRINGER	NEW YORK	233 SPRING ST, NEW YORK, NY 10013 USA	0175-7598			APPL MICROBIOL BIOT	Appl. Microbiol. Biotechnol.	JUL	2009	83	6
J	Li, XX; Liu, JF; Zhou, L; Mbadinga, SM; Yang, SZ; Gu, JD; Mu, BZ				Li, Xiao-Xiao; Liu, Jin-Feng; Zhou, Lei; Mbadinga, Serge M.; Yang, Shi-Zhong; Gu, Ji-Dong; Mu, Bo-Zhong			Diversity and Composition of Sulfate-Reducing Microbial Communities Based on Genomic DNA and RNA Transcription in Production Water of High Temperature and Corrosive Oil Reservoir	FRONTIERS IN MICROBIOLOGY			English	Article						subsurface petroleum reservoirs; sulfate-reducing microorganisms (SRM); aprA; dsrA; RT-qPCR	RIBOSOMAL-RNA; BACTERIA; PROKARYOTES; BIOFILM; IRON; REDUCTION; INJECTION; ARCHAEA; MICROORGANISMS; IDENTIFICATION	Deep subsurface petroleum reservoir ecosystems harbor a high diversity of microorganisms, and microbial influenced corrosion is a major problem for the petroleum industry. Here, we used high-throughput sequencing to explore the microbial communities based on genomic 16S rDNA and metabolically active 16S rRNA analyses of production water samples with different extents of corrosion from a high-temp…	[Li, Xiao-Xiao; Liu, Jin-Feng; Zhou, Lei; Mbadinga, Serge M.; Yang, Shi-Zhong; Mu, Bo-Zhong] East China Univ Sci & Technol, State Key Lab Bioreactor Engn, Shanghai, Peoples R China; [Li, Xiao-Xiao; Liu, Jin-Feng; Zhou, Lei; Mbadinga, Serge M.; Yang, Shi-Zhong; Mu, Bo-Zhong] East China Univ Sci & Technol, Inst Appl Chem, Shanghai, Peoples R China; [Mbadinga, Serge M.; Mu, Bo-Zhong] Shanghai Collab…	East China University of Science & Technology; East China University of Science & Technology; University of Hong Kong	Mu, BZ (corresponding author), East China Univ Sci & Technol, State Key Lab Bioreactor Engn, Shanghai, Peoples R China.; Mu, BZ (corresponding author), East China Univ Sci & Technol, Inst Appl Chem, Shanghai, Peoples R China.; Mu, BZ (corresponding author), Shanghai Collaborat Innovat Ctr Biomfg Technol, Shanghai, Peoples R China.	bzmu@ecust.edu.cn	Mbadinga, Serge Maurice/I-3789-2017; Gu, Ji-Dong/AAO-7851-2020; Gu, Ji-Dong/AAF-2291-2019; Mu, Bo-Zhong/F-4704-2017	Mu, Bo-Zhong/0000-0002-9564-4970	National Science Foundation of China [41530318]; Research Foundation of Shanghai [15JC1401400]; Fundamental Research Funds for the Central Universities of China [222201717017]	National Science Foundation of China(National Natural Science Foundation of China (NSFC)); Research Foundation of Shanghai; Fundamental Research Funds for the Central Universities of China(Fundamental Research Funds for the Central Universities)	This work was supported by the National Science Foundation of China (No. 41530318), the Research Foundation of Shanghai (No. 15JC1401400), and the Fundamental Research Funds for the Central Universities of China (No. 222201717017).		94	33	34	0	49	FRONTIERS MEDIA SA	LAUSANNE	AVENUE DU TRIBUNAL FEDERAL 34, LAUSANNE, CH-1015, SWITZERLAND		1664-302X		FRONT MICROBIOL	Front. Microbiol.	JUN 7	2017	8
J	Frank, Y; Banks, D; Avakian, M; Antsiferov, D; Kadychagov, P; Karnachuk, O				Frank, Yulia; Banks, David; Avakian, Marat; Antsiferov, Dmitry; Kadychagov, Petr; Karnachuk, Olga			Firmicutes is an Important Component of Microbial Communities in Water-Injected and Pristine Oil Reservoirs, Western Siberia, Russia	GEOMICROBIOLOGY JOURNAL			English	Article						deep biosphere; oil fields; Western Siberian basin; 16S rRNA gene; Firmicutes	SULFATE-REDUCING BACTERIA; 16S RIBOSOMAL-RNA; CONTINENTAL HIGH-TEMPERATURE; PHYLOGENETIC DIVERSITY; CRUDE-OIL; NORTH-SEA; REDUCTASE GENES; PETROLEUM; FIELD; MICROORGANISMS	The dominant microbial components of fluids from wells in pristine and water-injected, high-temperature, Western Siberian oil fields, were analyzed by PCR-DGGE. Particular emphasis was placed on sulphate-reducing organisms, due to their ecological and industrial importance. Bacterial phylotypes obtained from the non-water-injected Stolbovoye oil field were more diverse than those from the Samotlo…	[Frank, Yulia; Avakian, Marat; Antsiferov, Dmitry; Karnachuk, Olga] Tomsk State Univ, Biochem & Mol Biol Lab, Tomsk 634050, Russia; [Banks, David] Univ Glasgow, Glasgow & Holymoor Consultancy Ltd, Chesterfield, England; [Kadychagov, Petr] Russian Acad Sci, Inst Petr Chem, Siberian Branch, Tomsk, Russia	Tomsk State University; University of Glasgow; Institute of Petroleum Chemistry SB RAS; Russian Academy of Sciences	Frank, Y (corresponding author), Tomsk State Univ, Lenina Prospect 36, Tomsk 634050, Russia.	yulia.frank@rambler.ru	Antsiferov, Dmitry V/T-8719-2017; Karnachuk, Olga V/A-7431-2014; Avakyan, Marat/AAV-2066-2021; Antsiferov, Dmitry/AAQ-9015-2021; Frank, Yulia A/H-4506-2016; Antsiferov, Dmitry V./I-9869-2016	Antsiferov, Dmitry V/0000-0002-1865-1675; Karnachuk, Olga V/0000-0002-1318-2224; Avakyan, Marat/0000-0002-5901-8665; Antsiferov, Dmitry/0000-0002-1865-1675; Frank, Yulia A/0000-0001-6347-4009; Banks, David/0000-0002-4575-504X	Russian Ministry of Education and Science from government of the Russian Federation [14.Z50.31.0011]; Russian ScientificFoundation [14-14-00427]; Russian Science Foundation [14-14-00427] Funding Source: Russian Science Foundation	Russian Ministry of Education and Science from government of the Russian Federation; Russian ScientificFoundation(Russian Science Foundation (RSF)); Russian Science Foundation(Russian Science Foundation (RSF))	We acknowledge support from the Russian Ministry of Education and Science under grant from the government of the Russian Federation, Contract number 14.Z50.31.0011. Molecular screening of SRB was performed by the support of the Russian ScientificFoundation, Contract number 14-14-00427.		84	23	25	1	36	TAYLOR & FRANCIS INC	PHILADELPHIA	530 WALNUT STREET, STE 850, PHILADELPHIA, PA 19106 USA	0149-0451	1521-0529		GEOMICROBIOL J	Geomicrobiol. J.	MAY 27	2016	33	5
J	Xu, NN; Bao, MT; Sun, PY; Li, YM				Xu, Nana; Bao, Mutai; Sun, Peiyan; Li, Yiming			Study on bioadsorption and biodegradation of petroleum hydrocarbons by a microbial consortium	BIORESOURCE TECHNOLOGY			English	Article						Biodegradation; Bioadsorption; Heavy metal; PAHs; Crude oil	POLYCYCLIC AROMATIC-HYDROCARBONS; AQUEOUS-SOLUTIONS; BIOSORPTION; PAHS; SORPTION; BIOMASS; METALS; SOIL	A microbial consortium isolated from Shengli oilfield polluted sludge was capable of degrading naphthalene (NAP), phenanthrene (PHE), pyrene (PYR) and crude oil. It performed high biodegradation activity and emulsifiability for petroleum hydrocarbons, and was tolerant to 6.2 mM Cu2+, 2.7 mM Zn2+ and 9.5 mM Pb2+. Biodegradation rates of NAP, PHE, PYR and crude oil were 53%, 21%, 32% and 44% in the…	[Xu, Nana; Bao, Mutai; Li, Yiming] Ocean Univ China, Key Lab Marine Chem Theory & Technol, Minist Educ, Qingdao, Shandong, Peoples R China; [Sun, Peiyan] North China Sea Environm Monitoring Ctr State Oce, Key Lab Marine Spill Oil Identificat & Damage Ass, Qingdao, Shandong, Peoples R China	Ocean University of China	Bao, MT (corresponding author), 238 Songling Rd, Qingdao 266100, Shandong, Peoples R China.	mtbao@ouc.edu.cn			Program for New Century Excellent Talents in University [NCET-11-0464]; The National Natural Science Foundation of China [41376084, 21077028]; The development program of science and technology in Shandong province [2011GHY11522]	Program for New Century Excellent Talents in University(Program for New Century Excellent Talents in University (NCET)); The National Natural Science Foundation of China(National Natural Science Foundation of China (NSFC)); The development program of science and technology in Shandong province	The study was supported by "Program for New Century Excellent Talents in University" (NCET-11-0464); "The National Natural Science Foundation of China" (41376084, 21077028); "The development program of science and technology in Shandong province" (2011GHY11522).		35	61	64	5	169	ELSEVIER SCI LTD	OXFORD	THE BOULEVARD, LANGFORD LANE, KIDLINGTON, OXFORD OX5 1GB, OXON, ENGLAND	0960-8524	1873-2976		BIORESOURCE TECHNOL	Bioresour. Technol.	DEC	2013	149
J	Agrawal, A; Gieg, LM				Agrawal, Akhil; Gieg, Lisa M.			In situ detection of anaerobic alkane metabolites in subsurface environments	FRONTIERS IN MICROBIOLOGY			English	Review						anaerobic; metabolites; alkylsuccinates; alkanes; subsurface	ALKYLSUCCINATE SYNTHASE GENES; BACTERIAL ENRICHMENT CULTURE; SULFATE-REDUCING CONDITIONS; CRUDE-OIL BIODEGRADATION; CHAIN N-ALKANES; DENITRIFYING BACTERIUM; AROMATIC-HYDROCARBONS; METHANOGENIC CONDITIONS; CONTAMINATED AQUIFERS; PETROLEUM RESERVOIR	Alkanes comprise a substantial fraction of crude oil and refined fuels. As such, they are prevalent within deep subsurface fossil fuel deposits and in shallow subsurface environments such as aquifers that are contaminated with hydrocarbons. These environments are typically anaerobic, and host diverse microbial communities that can potentially use alkanes as substrates. Anaerobic alkane biodegrada…	[Agrawal, Akhil; Gieg, Lisa M.] Univ Calgary, Dept Biol Sci, Petr Microbiol Res Grp, Calgary, AB T2N 1N4, Canada	University of Calgary	Gieg, LM (corresponding author), Univ Calgary, Dept Biol Sci, Petr Microbiol Res Grp, 2500 Univ Dr NW, Calgary, AB T2N 1N4, Canada.	lmgieg@ucalgary.ca			Natural Sciences and Engineering Research Council of Canada (NSERC); NSERC Industrial Research Chair (University of Calgary); Aramco Services; Baker Hughes Incorporated; British Petroleum; Intertek/CML; Computer Modelling Group Limited; ConocoPhillips Company; YPF SA; Shell Canada Limited; Suncor Energy Developments Inc.; Yara International ASA; Alberta Innovates-Energy and Environment Solutions	Natural Sciences and Engineering Research Council of Canada (NSERC)(Natural Sciences and Engineering Research Council of Canada (NSERC)); NSERC Industrial Research Chair (University of Calgary); Aramco Services; Baker Hughes Incorporated; British Petroleum; Intertek/CML; Computer Modelling Group Limited; ConocoPhillips Company; YPF SA; Shell Canada Limited; Suncor Energy Developments Inc.; Yara I…	The preparation of this review was supported by funding from the Natural Sciences and Engineering Research Council of Canada (NSERC) via a Discovery Grant awarded to Lisa M. Gieg. Akhil Agrawal was supported through NSERC Industrial Research Chair funding awarded to Dr. Gerrit Voordouw (University of Calgary) that was in turn supported by the partner companies Aramco Services, Baker Hughes Incorp…		90	43	43	2	68	FRONTIERS MEDIA SA	LAUSANNE	AVENUE DU TRIBUNAL FEDERAL 34, LAUSANNE, CH-1015, SWITZERLAND	1664-302X			FRONT MICROBIOL	Front. Microbiol.	JUN 4	2013	4
J	Yoshida, N; Yagi, K; Sato, D; Watanabe, N; Kuroishi, T; Nishimoto, K; Yanagida, A; Katsuragi, T; Kanagawa, T; Kurane, R; Tani, Y				Yoshida, N; Yagi, K; Sato, D; Watanabe, N; Kuroishi, T; Nishimoto, K; Yanagida, A; Katsuragi, T; Kanagawa, T; Kurane, R; Tani, Y			Bacterial communities in petroleum oil in stockpiles	JOURNAL OF BIOSCIENCE AND BIOENGINEERING			English	Article						bacterial community; oil stockpile; 16S rRNA; denaturing gel electrophoresis; crude oil	SULFATE-REDUCING BACTERIA; 16S RIBOSOMAL-RNA; CRUDE-OIL; GEN-NOV; POPULATIONS; RESERVOIRS	Bacterial communities in crude-oil samples from Japanese oil stockpiles were investigated by, 16S rRNA gene cloning, followed by denaturing gradient gel electrophoresis (DGGE) analysis. 16S rRNA genes were successfully amplified by PCR after isooctane treatment from three kinds of crude-oil sample collected at four oil stockpiles in Japan. DGGE profiles showed that bacteria related to Ochrobactru…	Nara Inst Sci & Technol, Grad Sch Biol Sci, Nara 6300192, Japan; Natl Inst Adv Ind Sci & Technol, Inst Biol Resources & Funct, Tsukuba, Ibaraki 3058566, Japan	Nara Institute of Science & Technology; National Institute of Advanced Industrial Science & Technology (AIST)	Yoshida, N (corresponding author), Nara Inst Sci & Technol, Grad Sch Biol Sci, 89165 Takayama, Nara 6300192, Japan.	yoshidan@bs.naist.jp		Kanagawa, Takahiro/0000-0003-2476-6767					21	66	70	3	21	SOC BIOSCIENCE BIOENGINEERING JAPAN	OSAKA	OSAKA UNIV, FACULTY ENGINEERING, 2-1 YAMADAOKA, SUITA, OSAKA, 565-0871, JAPAN	1389-1723			J BIOSCI BIOENG	J. Biosci. Bioeng.	FEB	2005	99	2
J	Li, H; Yang, SZ; Mu, BZ; Rong, ZF; Zhang, J				Li, Hui; Yang, Shi-Zhong; Mu, Bo-Zhong; Rong, Zhao-Feng; Zhang, Jie			Molecular phylogenetic diversity of the microbial community associated with a high-temperature petroleum reservoir at an offshore oilfield	FEMS MICROBIOLOGY ECOLOGY			English	Article						petroleum reservoir; 16S rRNA gene diversity; microbial community; clone library	CONTINENTAL HIGH-TEMPERATURE; RIBOSOMAL-RNA GENES; SP-NOV.; DEEP SUBSURFACE; BACTERIAL DIVERSITY; BIAS; BIOREMEDIATION; SUBTERRANEUS; ASSEMBLAGES; CULTIVATION	The microbial community and its diversity in production water from a high-temperature, water-flooded petroleum reservoir of an offshore oilfield in China were characterized by 16S rRNA gene sequence analysis. The bacterial and archaeal 16S rRNA gene clone libraries were constructed from the community DNA and, using sequence analysis, 388 bacterial and 220 archaeal randomly selected clones were cl…	E China Univ Sci & Technol, Inst Appl Chem, Shanghai 200237, Peoples R China; E China Univ Sci & Technol, Inst Bioengn, Shanghai, Peoples R China	East China University of Science & Technology; East China University of Science & Technology	Mu, BZ (corresponding author), E China Univ Sci & Technol, Inst Appl Chem, Shanghai 200237, Peoples R China.	bzmu@ecust.edu.cn	Mu, Bo-Zhong/F-4704-2017; Hui, Li/B-4166-2009	Mu, Bo-Zhong/0000-0002-9564-4970; Hui, Li/0000-0002-7574-048X					68	110	119	2	38	OXFORD UNIV PRESS	OXFORD	GREAT CLARENDON ST, OXFORD OX2 6DP, ENGLAND	0168-6496	1574-6941		FEMS MICROBIOL ECOL	FEMS Microbiol. Ecol.	APR	2007	60	1
J	Chai, LJ; Jiang, XW; Zhang, F; Zheng, BW; Shu, FC; Wang, ZL; Cui, QF; Dong, HP; Zhang, ZZ; Hou, DJ; She, YH				Chai, Lu-jun; Jiang, Xia-wei; Zhang, Fan; Zheng, Bei-wen; Shu, Fu-chang; Wang, Zheng-liang; Cui, Qing-feng; Dong, Han-ping; Zhang, Zhong-zhi; Hou, Du-jie; She, Yue-hui			Isolation and characterization of a crude oil degrading bacteria from formation water: comparative genomic analysis of environmental Ochrobactrum intermedium isolate versus clinical strains	JOURNAL OF ZHEJIANG UNIVERSITY-SCIENCE B			English	Article						Comparative genome; Ochrobactrum intermedium; Oil degradation; Pathogen	DRAFT GENOME; COG DATABASE; SEQUENCE; ANTHROPI; DEGRADATION; REVEALS; NOV.	In this study, we isolated an environmental clone of Ochrobactrum intermedium, strain 2745-2, from the formation water of Changqing oilfield in Shanxi, China, which can degrade crude oil. Strain 2745-2 is aerobic and rod-shaped with optimum growth at 42 A degrees C and pH 5.5. We sequenced the genome and found a single chromosome of 4 800 175 bp, with a G+C content of 57.63%. Sixty RNAs and 4737 …	[Chai, Lu-jun; Zhang, Fan; Hou, Du-jie] China Univ Geosci, Sch Energy Resources, Key Lab Marine Reservoir Evolut & Hydrocarbon Acc, Beijing 100083, Peoples R China; [Jiang, Xia-wei; Zheng, Bei-wen] Zhejiang Univ, Sch Med, Affiliated Hosp 1, State Key Lab Diag & Treatment Infect Dis, Hangzhou 310003, Zhejiang, Peoples R China; [Shu, Fu-chang; Wang, Zheng-liang; She, Yue-hui] Yangtze Univ, Coll Che…	China University of Geosciences; Zhejiang University; Yangtze University; Chinese Academy of Sciences; China University of Petroleum	Zheng, BW (corresponding author), Zhejiang Univ, Sch Med, Affiliated Hosp 1, State Key Lab Diag & Treatment Infect Dis, Hangzhou 310003, Zhejiang, Peoples R China.	zhengbw@zju.edu.cn; sheyuehui@163.com	she, yuehui/HGA-7099-2022		National High-Tech R & D Program (863) of China [2013AA064402]; National Natural Science Foundation of China [81301461, 51474034]; Zhejiang Provincial Natural Science Foundation of China [LQ13H190002]; Scientific Research Foundation of Zhejiang Provincial Health Bureau, China [2012KYB083]	National High-Tech R & D Program (863) of China(National High Technology Research and Development Program of China); National Natural Science Foundation of China(National Natural Science Foundation of China (NSFC)); Zhejiang Provincial Natural Science Foundation of China(Natural Science Foundation of Zhejiang Province); Scientific Research Foundation of Zhejiang Provincial Health Bureau, China	Project supported by the National High-Tech R & D Program (863) of China (No. 2013AA064402), the National Natural Science Foundation of China (Nos. 81301461 and 51474034), the Zhejiang Provincial Natural Science Foundation of China (No. LQ13H190002), and the Scientific Research Foundation of Zhejiang Provincial Health Bureau (No. 2012KYB083), China		49	7	11	2	27	ZHEJIANG UNIV PRESS	Hangzhou	Xixi Campus, Zhejiang University, No. 148 Tianmushan Road, Hangzhou, Zhejiang, PEOPLES R CHINA	1673-1581	1862-1783		J ZHEJIANG UNIV-SC B	J. Zhejiang Univ.-SCI. B	OCT	2015	16	10
J	Yeung, CW; Lee, K; Cobanli, S; King, T; Bugden, J; Whyte, LG; Greer, CW				Yeung, C. William; Lee, Kenneth; Cobanli, Susan; King, Tom; Bugden, Jay; Whyte, Lyle G.; Greer, Charles W.			Characterization of the microbial community structure and the physicochemical properties of produced water and seawater from the Hibernia oil production platform	ENVIRONMENTAL SCIENCE AND POLLUTION RESEARCH			English	Article						Produced water; Petroleum waste byproduct; Microbial communities; DGGE; q-PCR; Thermoanaerobacter	RIBOSOMAL-RNA GENES; CONTINENTAL HIGH-TEMPERATURE; SP-NOV; CRUDE-OIL; NORTH-SEA; OFFSHORE OIL; PHYLOGENETIC DIVERSITY; PETROLEUM RESERVOIR; BACTERIAL COMMUNITY; DEGRADING BACTERIA	Hibernia is Canada's largest offshore oil platform. Produced water is the major waste byproduct discharged into the ocean. In order to evaluate different potential disposal methods, a comprehensive study was performed to determine the impact from the discharge. Microorganisms are typically the first organisms to respond to changes in their environment. The objectives were to characterize the micr…	[Yeung, C. William; Greer, Charles W.] Natl Res Council Canada, Energy Min & Environm, Montreal, PQ H4P 2R2, Canada; [Yeung, C. William; Whyte, Lyle G.] McGill Univ, Dept Nat Resource Sci, Ste Anne De Bellevue, PQ H9X 3V9, Canada; [Lee, Kenneth] CSIRO, Australian Resources Res Ctr, Oceans & Atmosphere Natl Res Flagship, Kensington, WA 6151, Australia; [Cobanli, Susan; King, Tom; Bugden, Jay] Fish…	National Research Council Canada; McGill University; Commonwealth Scientific & Industrial Research Organisation (CSIRO); Fisheries & Oceans Canada	Yeung, CW (corresponding author), Natl Res Council Canada, Energy Min & Environm, 6100 Royalmount Ave, Montreal, PQ H4P 2R2, Canada.	williamcyeung@yahoo.com							96	8	8	0	17	SPRINGER HEIDELBERG	HEIDELBERG	TIERGARTENSTRASSE 17, D-69121 HEIDELBERG, GERMANY	0944-1344	1614-7499		ENVIRON SCI POLLUT R	Environ. Sci. Pollut. Res.	NOV	2015	22	22
J	Gieg, LM; Jack, TR; Foght, JM				Gieg, Lisa M.; Jack, Tom R.; Foght, Julia M.			Biological souring and mitigation in oil reservoirs	APPLIED MICROBIOLOGY AND BIOTECHNOLOGY			English	Review						Souring; Sulfide; Sulfate-reducing prokaryotes; Oil reservoirs; Water flooding; Nitrate; Biocides	SULFATE-REDUCING BACTERIA; DESULFOVIBRIO-VULGARIS HILDENBOROUGH; SULFIDE-OXIDIZING BACTERIA; TEMPERATURE PETROLEUM RESERVOIR; GENE-EXPRESSION ANALYSIS; SP-NOV; NORTH-SEA; MICROBIAL COMMUNITY; NITRATE INJECTION; FIELD WATERS	Souring in oilfield systems is most commonly due to the action of sulfate-reducing prokaryotes, a diverse group of anaerobic microorganisms that respire sulfate and produce sulfide (the key souring agent) while oxidizing diverse electron donors. Such biological sulfide production is a detrimental, widespread phenomenon in the petroleum industry, occurring within oil reservoirs or in topside proce…	[Foght, Julia M.] Univ Alberta, Dept Biol Sci, Edmonton, AB T6G 2E9, Canada; [Gieg, Lisa M.; Jack, Tom R.] Univ Calgary, Dept Biol Sci, Petr Microbiol Res Grp, Calgary, AB T2N 1N4, Canada	University of Alberta; University of Calgary	Foght, JM (corresponding author), Univ Alberta, Dept Biol Sci, CW405 Biol Sci Bldg, Edmonton, AB T6G 2E9, Canada.	julia.foght@ualberta.ca	Foght, Julia/A-2638-2014	Foght, Julia/0000-0002-8614-3875					144	185	195	1	99	SPRINGER	NEW YORK	233 SPRING ST, NEW YORK, NY 10013 USA	0175-7598	1432-0614		APPL MICROBIOL BIOT	Appl. Microbiol. Biotechnol.	OCT	2011	92	2
J	Wang, LY; Ke, WJ; Sun, XB; Liu, JF; Gu, JD; Mu, BZ				Wang, Li-Ying; Ke, Wen-Ji; Sun, Xiao-Bo; Liu, Jin-Feng; Gu, Ji-Dong; Mu, Bo-Zhong			Comparison of bacterial community in aqueous and oil phases of water-flooded petroleum reservoirs using pyrosequencing and clone library approaches	APPLIED MICROBIOLOGY AND BIOTECHNOLOGY			English	Article						Bacterial community; Aqueous and oil phases; Petroleum reservoir; Pyrosequencing; Water cut	16S RIBOSOMAL-RNA; CONTINENTAL HIGH-TEMPERATURE; MICROBIAL DIVERSITY; CRUDE-OIL; PHYLOGENETIC DIVERSITY; ANAEROBIC OXIDATION; MOLECULAR ANALYSIS; N-ALKANES; BIODEGRADATION; HYDROCARBONS	Bacterial communities in both aqueous and oil phases of water-flooded petroleum reservoirs were characterized by molecular analysis of bacterial 16S rRNA genes obtained from Shengli Oil Field using DNA pyrosequencing and gene clone library approaches. Metagenomic DNA was extracted from the aqueous and oil phases and subjected to polymerase chain reaction amplification with primers targeting the b…	[Wang, Li-Ying; Ke, Wen-Ji; Sun, Xiao-Bo; Liu, Jin-Feng; Mu, Bo-Zhong] E China Univ Sci & Technol, State Key Lab Bioreactor Engn, Shanghai 200237, Peoples R China; [Wang, Li-Ying; Ke, Wen-Ji; Sun, Xiao-Bo; Liu, Jin-Feng; Mu, Bo-Zhong] E China Univ Sci & Technol, Inst Appl Chem, Shanghai 200237, Peoples R China; [Wang, Li-Ying; Gu, Ji-Dong] Univ Hong Kong, Sch Biol Sci, Hong Kong, Hong Kong, Peopl…	East China University of Science & Technology; East China University of Science & Technology; University of Hong Kong	Mu, BZ (corresponding author), E China Univ Sci & Technol, State Key Lab Bioreactor Engn, Shanghai 200237, Peoples R China.	bzmu@ecust.edu.cn	Mu, Bo-Zhong/F-4704-2017; Gu, Ji-Dong/AAF-2291-2019; Gu, Ji-Dong/AAO-7851-2020	Mu, Bo-Zhong/0000-0002-9564-4970;	National Science Foundation of China [31200101]; Shanghai Postdoctoral Scientific Program [12R21412800]; China Postdoctoral Science Foundation [2013 T60426]; NSFC/RGC Joint Research Fund [41161160560, N_HKU 718/11]	National Science Foundation of China(National Natural Science Foundation of China (NSFC)); Shanghai Postdoctoral Scientific Program; China Postdoctoral Science Foundation(China Postdoctoral Science Foundation); NSFC/RGC Joint Research Fund	This work was supported by The National Science Foundation of China (no. 31200101), Shanghai Postdoctoral Scientific Program (no. 12R21412800), China Postdoctoral Science Foundation funded project (2013 T60426), and the NSFC/RGC Joint Research Fund (no. 41161160560, N_HKU 718/11). We thank Mr. Zhichao Zhou for constructing the heat map.		66	58	60	2	68	SPRINGER	NEW YORK	ONE NEW YORK PLAZA, SUITE 4600, NEW YORK, NY, UNITED STATES	0175-7598	1432-0614		APPL MICROBIOL BIOT	Appl. Microbiol. Biotechnol.	MAY	2014	98	9
J	Jamal, MT				Jamal, Mamdoh T.			Enrichment of Potential Halophilic Marinobacter Consortium for Mineralization of Petroleum Hydrocarbons and Also as Oil Reservoir Indicator in Red Sea, Saudi Arabia	POLYCYCLIC AROMATIC COMPOUNDS			English	Article						Crude oil; halophiles; hydrocarbon degradation; indicator strain; Marinobacter; salinity	POLYCYCLIC AROMATIC-HYDROCARBONS; BRINE-SEAWATER INTERFACE; RNA GENE-SEQUENCES; SP-NOV.; MICROBIAL COMMUNITY; BACTERIAL CONSORTIUM; BIODEGRADATION; WATER; PHENANTHRENE; DIVERSITY	The present study was conducted to reveal specific bacterial consortium belong to same genus capable of mineralizing petroleum hydrocarbons and also act as a valid indicator to locate the oil reservoir in Red Sea, Saudi Arabia. The study focused on area consist of hydrocarbons in briny water and sediment. The sites included Port Sudan Deep, Suakin Deep, Hatiba Deep, and Brian salt in the Red Sea,…	[Jamal, Mamdoh T.] King Abdulaziz Univ, Fac Marine Sci, Dept Marine Biol, Jeddah 21589, Saudi Arabia	King Abdulaziz University	Jamal, MT (corresponding author), King Abdulaziz Univ, Fac Marine Sci, Dept Marine Biol, Jeddah 21589, Saudi Arabia.	mjamal1@kau.edu.sa	Jamal, Mamdoh T/AAX-2337-2020	Jamal, Mamdoh T/0000-0002-9826-6928	King Abdulaziz University (KAU) Jeddah, Saudi Arabia [T-065/430-DSR]; KAU	King Abdulaziz University (KAU) Jeddah, Saudi Arabia; KAU	This collaboration of the Jeddah Transect Project between King Abdulaziz University and Helmholtz Center for Ocean Research GEOMAR was funded by King Abdulaziz University (KAU) Jeddah, Saudi Arabia, UNDER GRANT NO. (T-065/430-DSR). The author thank KAU technical and financial support. The author thank all the technical members in Pelagia-64PE350-1 and Poseidon-P408 for their support during sample…		36	8	8	6	20	TAYLOR & FRANCIS LTD	ABINGDON	2-4 PARK SQUARE, MILTON PARK, ABINGDON OR14 4RN, OXON, ENGLAND	1040-6638	1563-5333		POLYCYCL AROMAT COMP	Polycycl. Aromat. Compd.	FEB 14	2022	42	2
J	Sierra-Garcia, IN; Belgini, DRB; Torres-Ballesteros, A; Paez-Espino, D; Capilla, R; Neto, EVS; Gray, N; de Oliveira, VM				Sierra-Garcia, Isabel Natalia; Belgini, Daiane R. B.; Torres-Ballesteros, Adriana; Paez-Espino, David; Capilla, Ramses; Santos Neto, Eugenio, V; Gray, Neil; de Oliveira, Valeria Maia			In depth metagenomic analysis in contrasting oil wells reveals syntrophic bacterial and archaeal associations for oil biodegradation in petroleum reservoirs	SCIENCE OF THE TOTAL ENVIRONMENT			English	Article						Biodegradation; Hydrocarbons; Metagenomics; Microbiome; Syntrophism	MICROBIAL COMMUNITIES; CRUDE-OIL; HYDROCARBON DEGRADATION; AROMATIC-COMPOUNDS; DEEP SUBSURFACE; DIVERSITY; GENOME; GENES; FIELD; METHANOGENESIS	Microbial biodegradation of hydrocarbons in petroleum reservoirs has major consequences in the petroleum value and quality. The identification of microorganisms capable of in-situ degradation of hydrocarbons under the reservoir conditions is crucial to understand microbial roles in hydrocarbon transformation and the impact of oil exploration and production on energy resources. The aim of this stu…	[Sierra-Garcia, Isabel Natalia; Belgini, Daiane R. B.; de Oliveira, Valeria Maia] Univ Estadual Campinas, Res Ctr Chem Biol & Agr CPQBA, Microbial Resources Div, UNICAMP, Campinas, Brazil; [Sierra-Garcia, Isabel Natalia; Belgini, Daiane R. B.] Univ Estadual Campinas, Inst Biol, UNICAMP, Campinas, Brazil; [Torres-Ballesteros, Adriana] Rothamsted Res, Sustainable Agr Sci Dept, Harpenden, Herts, Eng…	Universidade Estadual de Campinas; Universidade Estadual de Campinas; UK Research & Innovation (UKRI); Biotechnology and Biological Sciences Research Council (BBSRC); Rothamsted Research; United States Department of Energy (DOE); Petrobras; Newcastle University - UK	Sierra-Garcia, IN (corresponding author), CPQBA UNICAMP, Microbial Resource Div, Av Alexandre Cazelatto 999, BR-13148218 Paulinia, SP, Brazil.	inatalia.sierra@gmail.com	Garcia, Isabel Natalia Sierra/Y-7477-2018; Oliveira, Valéria Maia/L-2422-2014; Ballesteros, Adriana Maria Torres/AAZ-6230-2020	Garcia, Isabel Natalia Sierra/0000-0001-6373-2901; Oliveira, Valéria Maia/0000-0001-8817-4758; Paez-Espino, David/0000-0002-2939-5398; Torres-Ballesteros, Adriana/0000-0003-3036-7623	Sao Paulo Research Foundation (FAPESP), Brazil [2011/14501-6]; Center for Computational Engineering and Sciences -FAPESP/Cepid [2013/08293-7]; PETROBRAS, Brazil	Sao Paulo Research Foundation (FAPESP), Brazil(Fundacao de Amparo a Pesquisa do Estado de Sao Paulo (FAPESP)); Center for Computational Engineering and Sciences -FAPESP/Cepid; PETROBRAS, Brazil	The authors are grateful to the Sao Paulo Research Foundation (FAPESP), Brazil for the scholarship granted to INSG (Process no. 2011/14501-6), to the Center for Computational Engineering and Sciences -FAPESP/Cepid (2013/08293-7) and to Melline Fontes and Gustavo Bueno Bellini for bioinformatic work and facilities. In addition, the authorswould like to thank PETROBRAS, Brazil for the financial sup…		89	16	17	2	70	ELSEVIER	AMSTERDAM	RADARWEG 29, 1043 NX AMSTERDAM, NETHERLANDS	0048-9697	1879-1026		SCI TOTAL ENVIRON	Sci. Total Environ.	MAY 1	2020	715
J	Liu, YF; Galzerani, DD; Mbadinga, SM; Zaramela, LS; Gu, JD; Mu, BZ; Zengler, K				Liu, Yi-Fan; Galzerani, Daniela Domingos; Mbadinga, Serge Maurice; Zaramela, Livia S.; Gu, Ji-Dong; Mu, Bo-Zhong; Zengler, Karsten			Metabolic capability and in situ activity of microorganisms in an oil reservoir	MICROBIOME			English	Article						Auxotrophy; Hydrocarbon degradation; Metagenomics and metatranscriptomics; Microbial community; Oil reservoir	RIBOSOMAL-RNA; N-ALKANES; ANAEROBIC BIODEGRADATION; ARCHAEOGLOBUS-FULGIDUS; PETROLEUM RESERVOIRS; SULFATE REDUCTION; DEEP SUBSURFACE; STRAIN ADP1; BACTERIAL; GENES	Background: Microorganisms have long been associated with oxic and anoxic degradation of hydrocarbons in oil reservoirs and oil production facilities. While we can readily determine the abundance of microorganisms in the reservoir and study their activity in the laboratory, it has been challenging to resolve what microbes are actively participating in crude oil degradation in situ and to gain ins…	[Liu, Yi-Fan; Mbadinga, Serge Maurice; Mu, Bo-Zhong] East China Univ Sci & Technol, State Key Lab Bioreactor Engn, 130 Meilong Rd, Shanghai 200237, Peoples R China; [Liu, Yi-Fan; Mbadinga, Serge Maurice; Mu, Bo-Zhong] East China Univ Sci & Technol, Inst Appl Chem, 130 Meilong Rd, Shanghai 200237, Peoples R China; [Liu, Yi-Fan; Galzerani, Daniela Domingos; Zaramela, Livia S.; Zengler, Karsten] Uni…	East China University of Science & Technology; East China University of Science & Technology; University of California System; University of California San Diego; University of Hong Kong; University of California System; University of California San Diego	Mu, BZ (corresponding author), East China Univ Sci & Technol, State Key Lab Bioreactor Engn, 130 Meilong Rd, Shanghai 200237, Peoples R China.; Mu, BZ (corresponding author), East China Univ Sci & Technol, Inst Appl Chem, 130 Meilong Rd, Shanghai 200237, Peoples R China.; Zengler, K (corresponding author), Univ Calif San Diego, Dept Pediat, 9500 Gilman Dr, San Diego, CA 92093 USA.; Mu, BZ (corres…	bzmu@ecust.edu.cn; kzengler@ucsd.edu	Mu, Bo-Zhong/F-4704-2017; Mbadinga, Serge Maurice/I-3789-2017; Gu, Ji-Dong/AAF-2291-2019; Zaramela, Lívia Soares/AAD-2687-2022; Gu, Ji-Dong/AAO-7851-2020	Mu, Bo-Zhong/0000-0002-9564-4970; Zaramela, Lívia Soares/0000-0002-1065-3799;	National Natural Science Foundation of China [41530318, 41373070]; NSFC/RGC Joint Research Fund [41161160560]; China Scholarship Council (CSC); University of California, San Diego; CNPq under the Brazilian Scientific Mobility Program, Ciencias sem Fronteiras [201011/2014-0]; US Department of Energy (DOE), Office of Science, Office of Biological & Environmental Research [DE-SC0012586]; Frontiers o…	National Natural Science Foundation of China(National Natural Science Foundation of China (NSFC)); NSFC/RGC Joint Research Fund; China Scholarship Council (CSC)(China Scholarship Council); University of California, San Diego(University of California System); CNPq under the Brazilian Scientific Mobility Program, Ciencias sem Fronteiras; US Department of Energy (DOE), Office of Science, Office of B…	This work was supported by the National Natural Science Foundation of China (Grant No. 41530318, 41373070) to YFL, SMM, and BZM and the NSFC/RGC Joint Research Fund (No. 41161160560) to JDG. China Scholarship Council (CSC) funded Yi-Fan Liu's doctoral scholarship in a joint-PhD program with the University of California, San Diego. Additionally, Daniela Domingos Galzerani was supported by CNPq und…		59	52	58	5	66	BMC	LONDON	CAMPUS, 4 CRINAN ST, LONDON N1 9XW, ENGLAND	2049-2618			MICROBIOME	Microbiome	JAN 5	2018	6
J	Mesle, M; Dromart, G; Oger, P				Mesle, Margaux; Dromart, Gilles; Oger, Philippe			Microbial methanogenesis in subsurface oil and coal	RESEARCH IN MICROBIOLOGY			English	Review						Methanogenesis; Biogenic methane; Oil degradation; Coalbed methane; Biotransformation; Deep-biosphere	POWDER RIVER-BASIN; SULFATE-REDUCING BACTERIA; CRUDE-OIL; MOLECULAR CHARACTERIZATION; PRODUCTION WATER; DEEP SUBSURFACE; GAS-FIELD; PETROLEUM RESERVOIR; METHANE GENERATION; BIOGENIC ORIGIN	It is now clear that active methanogens are present in the deep-subsurface. This paper reviews microbial population structures and the biodegradation of organic compounds to methane in situ within oil reservoirs and coal deposits. It summarizes our current knowledge of methanogenes and methanogenesis, fermenters, synthrophs and microbial metabolism of complex organic compounds in these two widely…	[Mesle, Margaux; Oger, Philippe] Ecole Normale Super Lyon, CNRS, UMR 5276, F-69364 Lyon 07, France; [Dromart, Gilles] Univ Lyon, CNRS UMR 5276, Ecole Normale Super Lyon, Lab Geol Lyon, F-69364 Lyon 07, France	Centre National de la Recherche Scientifique (CNRS); CNRS - National Institute for Earth Sciences & Astronomy (INSU); Ecole Normale Superieure de Lyon (ENS de LYON); UDICE-French Research Universities; Universite Claude Bernard Lyon 1; Ecole Normale Superieure de Lyon (ENS de LYON); UDICE-French Research Universities; Universite Claude Bernard Lyon 1	Oger, P (corresponding author), Ecole Normale Super Lyon, CNRS, UMR 5276, 46 Allee Italie, F-69364 Lyon 07, France.	poger@ens-lyon.fr	Oger, Phil M/C-8138-2012; Oger, Phil/AAR-4752-2020	Oger, Phil M/0000-0001-6298-6870;	Region Rhone-Alpes Programme CIBLE; Region Rhone-Alpes	Region Rhone-Alpes Programme CIBLE(Region Auvergne-Rhone-Alpes); Region Rhone-Alpes(Region Auvergne-Rhone-Alpes)	MM was supported by a fellowship of the Region Rhone-Alpes Programme CIBLE 2009. This work was supported by two grants from the Region Rhone-Alpes to GD and PO. The authors wish to thank Alex Stockwell for read-proofing the english writing of this manuscript. The authors are indebted to two anonymous reviewers who made a very crtical reading of this review and greatly helped improve its quality.		107	78	82	5	125	ELSEVIER	AMSTERDAM	RADARWEG 29, 1043 NX AMSTERDAM, NETHERLANDS	0923-2508	1769-7123		RES MICROBIOL	Res. Microbiol.	NOV	2013	164	9
J	Sun, SS; Luo, YJ; Zhou, Y; Xiao, M; Zhang, ZY; Hou, JR; Wei, XF; Xu, QS; Sha, T; Dong, H; Song, H; Zhang, ZZ				Sun, Shanshan; Luo, Yijing; Zhou, You; Xiao, Meng; Zhang, Zhiyong; Hou, Jirui; Wei, Xiaofang; Xu, Quanshu; Sha, Te; Dong, Hao; Song, Hao; Zhang, Zhongzhi			Application of Bacillus spp. in Pilot Test of Microbial Huff and Puff to Improve Heavy Oil Recovery	ENERGY & FUELS			English	Article							BIOSURFACTANT-PRODUCING PSEUDOMONAS; PETROLEUM RESERVOIR; CONTAMINATED SOIL; CRUDE-OIL; MICROORGANISMS; COMMUNITY; FIELD; DIVERSITY; BACTERIA; REMOVAL	Microbial metabolic products, such as biosurfactants, bioemulsifiers, acids, solvents, and biogases, are useful for reducing the viscosity of heavy oils and enhancing oil recovery. Two heavy oil viscosity-reducing microorganisms, namely, SH-2 and SH-3, were selected from produced water which were collected from high-temperature reservoirs by enrichment culture technique. The screened bacteria pro…	[Sun, Shanshan; Luo, Yijing; Zhang, Zhiyong; Xu, Quanshu; Sha, Te; Song, Hao; Zhang, Zhongzhi] China Univ Petr, Coll Chem Engn, State Key Lab Heavy Oil Proc, Beijing 102249, Peoples R China; [Luo, Yijing] Peking Univ, Coll Engn, Beijing 100871, Peoples R China; [Zhou, You; Wei, Xiaofang] Res Inst Petr Explorat & Dev, State Key Lab EOR, Beijing 100083, Peoples R China; [Xiao, Meng] Qingdao Univ Sc…	China University of Petroleum; Peking University; Qingdao University of Science & Technology; China University of Petroleum; Yangtze University	Zhang, ZZ (corresponding author), China Univ Petr, Coll Chem Engn, State Key Lab Heavy Oil Proc, Beijing 102249, Peoples R China.	bjzzzhang@163.com	Luo, Yijing/HDO-2735-2022		National Science and Technology Major Projects [2017ZX05009-004]	National Science and Technology Major Projects	The authors are grateful to the State Key Laboratory of Heavy Oil of China University of Petroleum. This research was funded by National Science and Technology Major Projects (No. 2017ZX05009-004).		44	14	15	3	44	AMER CHEMICAL SOC	WASHINGTON	1155 16TH ST, NW, WASHINGTON, DC 20036 USA	0887-0624	1520-5029		ENERG FUEL	Energy Fuels	DEC	2017	31	12
J	ADKINS, JP; CORNELL, LA; TANNER, RS				ADKINS, JP; CORNELL, LA; TANNER, RS			MICROBIAL COMPOSITION OF CARBONATE PETROLEUM RESERVOIR FLUIDS	GEOMICROBIOLOGY JOURNAL			English	Article						CARBONATE; MICROBIAL ECOLOGY; MICROBIALLY ENHANCED OIL RECOVERY; PETROLEUM RESERVOIRS		Production fluids from four single-zone completion wells in carbonate petroleum reservoirs were examined chemically and microbiologically to investigate the potential for microbially enhanced oil recovery in carbonate reservoirs. The water analysis indicated a lack of soluble nitrogen and phosphorus in these reservoir fluids. Three of the wells were highly saline, as expected, but one produced wa…	UNIV OKLAHOMA, DEPT BOT & MICROBIOL, NORMAN, OK 73019 USA	University of Oklahoma System; University of Oklahoma - Norman									38	60	65	0	6	TAYLOR & FRANCIS INC	PHILADELPHIA	530 WALNUT STREET, STE 850, PHILADELPHIA, PA 19106 USA	0149-0451	1521-0529		GEOMICROBIOL J	Geomicrobiol. J.	APR-JUN	1992	10	2
J	Zhou, ZC; Liang, B; Wang, LY; Liu, JF; Mu, BZ; Shim, H; Gu, JD				Zhou, Zhichao; Liang, Bo; Wang, Li-Ying; Liu, Jin-Feng; Mu, Bo-Zhong; Shim, Hojae; Gu, Ji-Dong			Identifying the core bacterial microbiome of hydrocarbon degradation and a shift of dominant methanogenesis pathways in the oil and aqueous phases of petroleum reservoirs of different temperatures from China	BIOGEOSCIENCES			English	Article							RIBOSOMAL-RNA GENES; PRODUCTION WATER; COMMUNITY COMPOSITION; CRUDE-OIL; N-ALKANES; DIVERSITY; QUANTIFICATION; SUBSURFACE; INJECTION	Microorganisms in petroleum reservoirs play significant roles in hydrocarbon degradation, and through the terminal electron-accepting process of methanogenesis, they also contribute to microbially enhanced oil recovery (MEOR) worldwide, with great economic and environmental benefits. Here, a molecular investigation, using the 16S rRNA and mcrA gene profiles based on MiSeq sequencing and clone lib…	[Zhou, Zhichao; Gu, Ji-Dong] Univ Hong Kong, Sch Biol Sci, Lab Environm Microbiol & Toxicol, Pokfulam Rd, Hong Kong, Peoples R China; [Liang, Bo; Wang, Li-Ying; Liu, Jin-Feng; Mu, Bo-Zhong] East China Univ Sci & Technol, State Key Lab Bioreactor Engn, Shanghai 200237, Peoples R China; [Liang, Bo; Wang, Li-Ying; Liu, Jin-Feng; Mu, Bo-Zhong] East China Univ Sci & Technol, Inst Appl Chem, Shanghai 2…	University of Hong Kong; East China University of Science & Technology; East China University of Science & Technology; University of Macau	Gu, JD (corresponding author), Univ Hong Kong, Sch Biol Sci, Lab Environm Microbiol & Toxicol, Pokfulam Rd, Hong Kong, Peoples R China.; Mu, BZ (corresponding author), East China Univ Sci & Technol, State Key Lab Bioreactor Engn, Shanghai 200237, Peoples R China.; Mu, BZ (corresponding author), East China Univ Sci & Technol, Inst Appl Chem, Shanghai 200237, Peoples R China.	bzmu@ecust.edu.cn; jdgu@hku.hk	Shim, Hojae/AAL-7052-2020; Gu, Ji-Dong/AAO-7851-2020; Mu, Bo-Zhong/F-4704-2017; Zhou, Zhichao/AAD-1000-2020; Zhou, Zhichao/AAK-4969-2020	Shim, Hojae/0000-0002-6863-8292; Mu, Bo-Zhong/0000-0002-9564-4970; Zhou, Zhichao/0000-0002-9120-6762;	NSFC/RGC [HKU718/11]; NSFC [41373070, 41530318]; HKU	NSFC/RGC(Hong Kong Research Grants CouncilNational Natural Science Foundation of China (NSFC)); NSFC(National Natural Science Foundation of China (NSFC)); HKU(University of Hong Kong)	This research has been supported by the NSFC/RGC (grant no. N HKU718/11), the NSFC (grant nos. 41373070 and 41530318) and a postgraduate scholarship from HKU.		57	3	4	4	33	COPERNICUS GESELLSCHAFT MBH	GOTTINGEN	BAHNHOFSALLEE 1E, GOTTINGEN, 37081, GERMANY	1726-4170	1726-4189		BIOGEOSCIENCES	Biogeosciences	NOV 8	2019	16	21
J	Li, H; Ai, MQ; Han, SQ; Guo, YL; Li, NN; Shi, RJ; Zeng, XL; Leng, SB; Zhao, JY; Liu, XB; Zhang, Y				Li Hui; Ai Mingqiang; Han Siqin; Guo Yanling; Li Nana; Shi Rongjiu; Zeng Xiangling; Leng Shengbing; Zhao Jinyi; Liu Xiaobo; Zhang Ying			Microbial diversity and functionally distinct groups in produced water from the Daqing Oilfield, China	PETROLEUM SCIENCE			English	Article						Petroleum microbiology; 16S rRNA gene diversity; methanogens; bio-surfactants producing bacteria; biopolymer-producing bacteria; nitrate-reducing bacteria	TEMPERATURE PETROLEUM RESERVOIR; SULFATE-REDUCING BACTERIA; PHYLOGENETIC DIVERSITY; SP-NOV; COMMUNITIES; GENES; RNA	The microbial community structure and functionally distinct groups in three kinds of produced water samples from the shallow, mesothermic and low-salinity Daqing oil reservoir were systematically evaluated using both culture-dependent and culture-independent methods. Sequence analysis of the 16S rRNA genes indicated that the bacterial library was dominated by Acinetobacter and Arcobacter and the …	[Li Hui; Ai Mingqiang; Han Siqin; Guo Yanling; Li Nana; Shi Rongjiu; Zeng Xiangling; Leng Shengbing; Zhang Ying] Chinese Acad Sci, Inst Appl Ecol, Key Lab Pollut Ecol & Environm Engn, Shenyang 110016, Liaoning, Peoples R China; [Zhao Jinyi; Liu Xiaobo] Daqing Oilfield Co Ltd, Daqing 163414, Heilongjiang, Peoples R China	Chinese Academy of Sciences; Shenyang Institute of Applied Ecology, CAS; Daqing Oilfield Company Limited	Zhang, Y (corresponding author), Chinese Acad Sci, Inst Appl Ecol, Key Lab Pollut Ecol & Environm Engn, Shenyang 110016, Liaoning, Peoples R China.	yzhang@iae.ac.cn	Li, Hui/AEA-0681-2022		Chinese Academy of Science through the Knowledge Innovation Project of The Chinese Academy of Sciences [06LYQY3001]; Daqing Oilfield Co. Ltd., China	Chinese Academy of Science through the Knowledge Innovation Project of The Chinese Academy of Sciences; Daqing Oilfield Co. Ltd., China	The project was financially supported by Chinese Academy of Science through the Knowledge Innovation Project of The Chinese Academy of Sciences (06LYQY3001). Funding for this project was also provided by Daqing Oilfield Co. Ltd., China.		35	14	15	0	60	SPRINGER HEIDELBERG	HEIDELBERG	TIERGARTENSTRASSE 17, D-69121 HEIDELBERG, GERMANY	1672-5107			PETROL SCI	Pet. Sci.	DEC	2012	9	4
J	Halim, AY; Pedersen, DS; Nielsen, SM; Lantz, AE				Halim, Amalia Yunita; Pedersen, Dorthe Skou; Nielsen, Sidsel Marie; Lantz, Anna Eliasson			Profiling of Indigenous Microbial Community Dynamics and Metabolic Activity During Enrichment in Molasses-Supplemented Crude Oil-Brine Mixtures for Improved Understanding of Microbial Enhanced Oil Recovery	APPLIED BIOCHEMISTRY AND BIOTECHNOLOGY			English	Article						MEOR; Anaerobic; Oil emulsion; Pyrosequencing; Microbial enrichment	SP NOV.; NORTH-SEA; GENUS ANAEROBACULUM; PETROLEUM RESERVOIR; EMENDED DESCRIPTION; BACTERIUM; FIELD; WELL; MICROORGANISMS; BIOTECHNOLOGY	Anaerobic incubations using crude oil and brine from a North Sea reservoir were conducted to gain increased understanding of indigenous microbial community development, metabolite production, and the effects on the oil-brine system after addition of a complex carbon source, molasses, with or without nitrate to boost microbial growth. Growth of the indigenous microbes was stimulated by addition of…	[Halim, Amalia Yunita; Nielsen, Sidsel Marie] Tech Univ Denmark DTU, Dept Chem & Biochem Engn, CERE, DK-2800 Lyngby, Denmark; [Pedersen, Dorthe Skou] DTI Oil & Gas, DTI, DK-8000 Aarhus, Denmark; [Lantz, Anna Eliasson] DTU, Dept Chem & Biochem Engn, Chem React Engn & Combust CHEC, DK-2800 Lyngby, Denmark	Technical University of Denmark; Technical University of Denmark	Halim, AY (corresponding author), Tech Univ Denmark DTU, Dept Chem & Biochem Engn, CERE, B 229, DK-2800 Lyngby, Denmark.	amah@kt.dtu.dk	Lantz, Anna Eliasson/G-8569-2012; Halim, Amalia Yunita/Q-7993-2017	Lantz, Anna Eliasson/0000-0003-1547-9299; Halim, Amalia Yunita/0000-0002-0072-2252; Nielsen, Sidsel Marie/0000-0003-0461-3042	Danish National Advanced Technology Foundation; Maersk Oil; DONG EP	Danish National Advanced Technology Foundation; Maersk Oil; DONG EP	This study has been carried as a part of the BioRec project supported by the Danish National Advanced Technology Foundation, Maersk Oil and DONG E&P. Maersk Oil is acknowledged for supplying the crude oil and produced water samples. The authors also wish to thank Son Huu Do from Maersk Oil for reviewing the manuscript. Nordic Sugar is acknowledged for providing the molasses for the experiment.		37	6	6	2	30	HUMANA PRESS INC	TOTOWA	999 RIVERVIEW DRIVE SUITE 208, TOTOWA, NJ 07512 USA	0273-2289	1559-0291		APPL BIOCHEM BIOTECH	Appl. Biochem. Biotechnol.	JUL	2015	176	4
J	Wang, XT; Li, XZ; Yu, L; Huang, LX; Xiu, JL; Lin, W; Zhang, YM				Wang, Xiaotong; Li, Xizhe; Yu, Li; Huang, Lixin; Xiu, Jianlong; Lin, Wei; Zhang, Yanming			Characterizing the microbiome in petroleum reservoir flooded by different water sources	SCIENCE OF THE TOTAL ENVIRONMENT			English	Article						Water-flooded petroleum reservoir; Microbiome; Microbial community; Metabolic potential; Metagenome	HIGH-TEMPERATURE; OIL-FIELD; CRUDE-OIL; PHYLOGENETIC DIVERSITY; COMMUNITY COMPOSITION; STATISTICAL-ANALYSIS; SP NOV.; NITRATE; INJECTION; BIODEGRADATION	Petroleumreservoir is an unusual subsurface biosphere, where indigenous microbes lived and evolved for million years. However, continual water injection changed the situation by introduction of new electron acceptors, donors and exogenous microbes. In this study, 16S-rRNA gene sequencing, comparative metagenomics and genomic bins reconstruction were employed to investigate the microbial community…	[Wang, Xiaotong; Li, Xizhe] PetroChina Co Ltd, Res Inst Petr Explorat & Dev, Beijing 100083, Peoples R China; [Wang, Xiaotong; Li, Xizhe; Yu, Li; Huang, Lixin; Xiu, Jianlong] PetroChina Co Ltd, Res Inst Petr Explorat & Dev, POB 44, Langfang 065007, Hebei, Peoples R China; [Yu, Li; Huang, Lixin; Xiu, Jianlong; Lin, Wei] Univ Chinese Acad Sci, Inst Porous Flow & Fluid Mech, Langfang 065007, Hebei, …	China National Petroleum Corporation; PetroChina Company; China National Petroleum Corporation; PetroChina Company; Chinese Academy of Sciences; University of Chinese Academy of Sciences, CAS; University of California System; University of California Berkeley	Li, XZ (corresponding author), PetroChina Co Ltd, Res Inst Petr Explorat & Dev, POB 44, Langfang 065007, Hebei, Peoples R China.	lxz69@petrochina.com.cn	Lin, Wei/F-1926-2019	Lin, Wei/0000-0002-8643-594X	National Science and Technology Major Project [2017ZX05009-004]; China Petroleum Science and Technology Major Project [2016B-1106]; National Nature Science Foundation of China [51804041]	National Science and Technology Major Project; China Petroleum Science and Technology Major Project; National Nature Science Foundation of China(National Natural Science Foundation of China (NSFC))	This work was supported by National Science and Technology Major Project [2017ZX05009-004]; China Petroleum Science and Technology Major Project [2016B-1106]; and the National Nature Science Foundation of China [51804041].		61	20	22	7	54	ELSEVIER SCIENCE BV	AMSTERDAM	PO BOX 211, 1000 AE AMSTERDAM, NETHERLANDS	0048-9697	1879-1026		SCI TOTAL ENVIRON	Sci. Total Environ.	FEB 25	2019	653
J	de Vasconcellos, SP; Crespim, E; da Cruz, GF; Senatore, DB; Simioni, KCM; Neto, EVD; Marsaioli, AJ; de Oliveira, VM				de Vasconcellos, Suzan Pantaroto; Crespim, Elaine; da Cruz, Georgiana Feitosa; Senatore, Diego Barbosa; Marques Simioni, Karen Christina; dos Santos Neto, Eugenio Vaz; Marsaioli, Anita Jocelyne; de Oliveira, Valeria Maia			Isolation, biodegradation ability and molecular detection of hydrocarbon degrading bacteria in petroleum samples from a Brazilian offshore basin	ORGANIC GEOCHEMISTRY			English	Article							16S RIBOSOMAL-RNA; OIL-FIELD; MICROBIAL COMMUNITIES; BACILLUS-SPP.; CRUDE-OIL; PCR; TEMPERATURE; DNA; IDENTIFICATION; AMPLIFICATION	The detection of microorganisms with potential for biodeterioration and biodegradation in petroleum fields is of great relevance, since these organisms may be related to a decrease in petroleum quality in the reservoirs or damage in the production facilities. In this sense, petroleum formation water and oil samples were collected from the Campos Basin, Brazil, with the aim of isolating microorgan…	[de Vasconcellos, Suzan Pantaroto; Crespim, Elaine; Marques Simioni, Karen Christina; de Oliveira, Valeria Maia] Univ Estadual Campinas, Res Ctr Chem Biol & Agr CPQBA, BR-13081970 Campinas, SP, Brazil; [de Vasconcellos, Suzan Pantaroto; da Cruz, Georgiana Feitosa; Senatore, Diego Barbosa; Marsaioli, Anita Jocelyne] Univ Estadual Campinas, Inst Chem, BR-13084971 Campinas, SP, Brazil; [dos Santos N…	Universidade Estadual de Campinas; Universidade Estadual de Campinas; Petrobras	de Oliveira, VM (corresponding author), Univ Estadual Campinas, Res Ctr Chem Biol & Agr CPQBA, CP 6171, BR-13081970 Campinas, SP, Brazil.	vmaia@cpqba.unicamp.br	Marsaioli, ANITA Jocelyne/AAY-7663-2020; Oliveira, Valéria Maia/L-2422-2014; MARSAIOLI, ANITA JOCELYNE/K-1854-2019; Vasconcellos, Suzan P/E-3954-2013; Marsaioli, Anita Jocelyne/D-7939-2018; Marsaioli, Anita J./D-2728-2012; Marsaioli, Anita Jocelyne/S-3192-2019; Vasconcellos, Suzan Pantaroto/H-7079-2012; Da Cruz, G. F./R-6522-2017	Oliveira, Valéria Maia/0000-0001-8817-4758; Marsaioli, Anita Jocelyne/0000-0002-7894-6942; Marsaioli, Anita J./0000-0002-7894-6942; Marsaioli, Anita Jocelyne/0000-0002-3247-0088; Da Cruz, G. F./0000-0003-2116-2837	FINEP [01.04.0550.00]; PETROBRAS; CAPES (Coordenacao de Aperfeicoamento de Pessoal de Nivel Superior); CNPq (Conselho Nacional de Desenvolvimento Cientifico e Tecnologico, Brazil)	FINEP(Financiadora de Inovacao e Pesquisa (Finep)); PETROBRAS(Fundacao de Amparo a Pesquisa do Amapa (FAPEAP)Petrobras); CAPES (Coordenacao de Aperfeicoamento de Pessoal de Nivel Superior)(Coordenacao de Aperfeicoamento de Pessoal de Nivel Superior (CAPES)); CNPq (Conselho Nacional de Desenvolvimento Cientifico e Tecnologico, Brazil)(Conselho Nacional de Desenvolvimento Cientifico e Tecnologico (…	The work was part of the multidisciplinary Project BIOPETRO supported by FINEP (process number 01.04.0550.00) and PETROBRAS. S.P.V. and G.F.C. were supported by grants from CAPES (Coordenacao de Aperfeicoamento de Pessoal de Nivel Superior) and E.C. by grants from CNPq (Conselho Nacional de Desenvolvimento Cientifico e Tecnologico, Brazil). We thank Marcos Merzel for figures artwork and PETROBRAS…		81	44	46	1	32	PERGAMON-ELSEVIER SCIENCE LTD	OXFORD	THE BOULEVARD, LANGFORD LANE, KIDLINGTON, OXFORD OX5 1GB, ENGLAND	0146-6380	1873-5290		ORG GEOCHEM	Org. Geochem.	MAY	2009	40	5
J	Dellagnezze, BM; de Vasconcellos, SP; de Melo, IS; Neto, EVD; de Oliveira, VM				Dellagnezze, Bruna Martins; de Vasconcellos, Suzan Pantaroto; de Melo, Itamar Soares; dos Santos Neto, Eugenio Vaz; de Oliveira, Valeria Maia			Evaluation of bacterial diversity recovered from petroleum samples using different physical matrices	BRAZILIAN JOURNAL OF MICROBIOLOGY			English	Article						Bacterial diversity; Microbial enrichment; Petroleum reservoir; Physical support; 16S rRNA	16S RIBOSOMAL-RNA; OIL-FIELD; HYDROCARBON DEGRADATION; AROMATIC-HYDROCARBONS; POLYURETHANE FOAM; SP NOV.; RESERVOIRS; COMMUNITY; WATER; BIODEGRADATION	Unraveling the microbial diversity and its complexity in petroleum reservoir environments has been a challenge throughout the years. Despite the techniques developed in order to improve methodologies involving DNA extraction from crude oil, microbial enrichments using different culture conditions can be applied as a way to increase the recovery of DNA from environments with low cellular density f…	[Dellagnezze, Bruna Martins; de Oliveira, Valeria Maia] Univ Campinas UNICAMP, Res Ctr Chem, Div Microbial Resources, Biol,Agr CPQBA, Campinas, SP, Brazil; [de Vasconcellos, Suzan Pantaroto] Fed Univ Sao Paulo UNIFESP, Dept Biol Sci, Diadema, SP, Brazil; [de Melo, Itamar Soares] EMBRAPA, Natl Ctr Res Monitoring & Evaluating Environm Imp, Jaguariuna, SP, Brazil; [dos Santos Neto, Eugenio Vaz] PETR…	Universidade Estadual de Campinas; Universidade Federal de Sao Paulo (UNIFESP); Empresa Brasileira de Pesquisa Agropecuaria (EMBRAPA); Petrobras	Dellagnezze, BM (corresponding author), Univ Campinas UNICAMP, Res Ctr Chem, Div Microbial Resources, Biol,Agr CPQBA, Campinas, SP, Brazil.	brunamadell@gmail.com	Vasconcellos, Suzan P/E-3954-2013; Oliveira, Valéria Maia/L-2422-2014; Vasconcellos, Suzan Pantaroto/H-7079-2012	Oliveira, Valéria Maia/0000-0001-8817-4758; Dellagnezze, Bruna/0000-0002-4467-0407					67	4	4	1	26	SOC BRASILEIRA MICROBIOLOGIA	SAO PAULO	AV PROF LINEU PRESTES,1374, 05508 SAO PAULO, BRAZIL	1517-8382	1678-4405		BRAZ J MICROBIOL	Braz. J. Microbiol.	JUL-SEP	2016	47	3
J	Zhou, L; Wang, DW; Zhang, SL; Tang, EG; Lu, YW; Jing, YF; Lin, DD; Liu, ZL; Liu, JF; Yang, SZ; Zhang, J; Gu, JD; Mu, BZ				Zhou, Lei; Wang, Da-Wei; Zhang, Shi-Lun; Tang, En-Gao; Lu, Yu-Wei; Jing, Ya-Fei; Lin, Dan-Dan; Liu, Zhong-Lin; Liu, Jin-Feng; Yang, Shi-Zhong; Zhang, Jian; Gu, Ji-Dong; Mu, Bo-Zhong			Functional microorganisms involved in the sulfur and nitrogen metabolism in production water from a high-temperature offshore petroleum reservoir	INTERNATIONAL BIODETERIORATION & BIODEGRADATION			English	Article						Offshore petroleum reservoir; Sulfate-reducing prokaryote; Sulfur-oxidizing prokaryote; Nitrate-reducing bacteria; Denitrifier; Functional gene	SULFATE-REDUCING BACTERIUM; SP NOV.; GEN. NOV.; MICROBIAL COMMUNITIES; OIL-RESERVOIRS; THERMODESULFOBACTERIUM-COMMUNE; DENITRIFYING BACTERIA; OXIDIZING BACTERIA; SULFIDE PRODUCTION; SOURING CONTROL	Microorganisms with diverse metabolic functions inhabit petroleum reservoir systems utilizing multiple electron acceptors, but current understanding about the composition and diversity of functional microbial community in offshore oilfields is still scarce. In this study, the diversity, phylogenetic distribution and abundance of microbes involved in the sulfur (S) and nitrogen (N) metabolisms in …	[Zhou, Lei; Wang, Da-Wei; Zhang, Shi-Lun; Tang, En-Gao; Zhang, Jian] State Key Lab Offshore Oil Exploitat, Beijing 100028, Peoples R China; [Zhou, Lei; Lu, Yu-Wei; Jing, Ya-Fei; Lin, Dan-Dan; Liu, Zhong-Lin; Liu, Jin-Feng; Yang, Shi-Zhong; Mu, Bo-Zhong] East China Univ Sci & Technol, State Key Lab Bioreactor Engn, 130 Meilong Rd, Shanghai 200237, Peoples R China; [Zhou, Lei; Lu, Yu-Wei; Jing, Ya-…	East China University of Science & Technology; East China University of Science & Technology; Guangdong Technion Israel Institute of Technology; East China University of Science & Technology	Zhang, J (corresponding author), State Key Lab Offshore Oil Exploitat, Beijing 100028, Peoples R China.; Mu, BZ (corresponding author), East China Univ Sci & Technol, State Key Lab Bioreactor Engn, 130 Meilong Rd, Shanghai 200237, Peoples R China.; Mu, BZ (corresponding author), East China Univ Sci & Technol, Sch Chem & Mol Engn, 130 Meilong Rd, Shanghai 200237, Peoples R China.	zhangjian@cnooc.com.cn; bzmu@ecust.edu.cn	Lin, Dandan/GRJ-2233-2022; Mu, Bo-Zhong/F-4704-2017	Mu, Bo-Zhong/0000-0002-9564-4970	Open Fund of State Key Laboratory of Offshore Oil Exploitation [CCL2018RCPS0028RON]	Open Fund of State Key Laboratory of Offshore Oil Exploitation	This work was supported by Open Fund of State Key Laboratory of Offshore Oil Exploitation (CCL2018RCPS0028RON).		85	4	4	3	25	ELSEVIER SCI LTD	OXFORD	THE BOULEVARD, LANGFORD LANE, KIDLINGTON, OXFORD OX5 1GB, OXON, ENGLAND	0964-8305	1879-0208		INT BIODETER BIODEGR	Int. Biodeterior. Biodegrad.	OCT	2020	154
C	She, YH; Zhang, F; Shu, FC; Zhao, LP; Yu, LJ			IEEE	She, Yuehui; Zhang, Fan; Shu, Fuchang; Zhao, Liping; Yu, Longjiang			Indigenous microbial diversity in conglomerate oil reservoirs analyzed by PCR-DGGE	2009 3RD INTERNATIONAL CONFERENCE ON BIOINFORMATICS AND BIOMEDICAL ENGINEERING, VOLS 1-11			English	Proceedings Paper	3rd International Conference on Bioinformatics and Biomedical Engineering	JUN 11-16, 2009	Beijing, PEOPLES R CHINA	IEEE Engn Med & Biol Soc, Gordon Life Sci Inst, Fudan Univ, Beijing Univ Posts & Telecommunicat, Beijing Inst Technol, Wuhan Univ, Journal Biomed Sci & Engn		injection well; production well; denaturing gradient gel electrophoresis (DGGE); diversity; microbial enhancement of oil recovery (MEOR)	POLYMERASE-CHAIN-REACTION; 16S RIBOSOMAL-RNA; NORTH-SEA; COMMUNITY STRUCTURE; FIELD; POPULATIONS; WATERS; GENES	Recent investigations of the microbial communities in an oil reservoir using culture-independent molecular techniques has indicated that this environment contains many uncultured assemblages, and that the cultured bacteria may represent very minor components of the true microbial diversity. In this study, 16S rDNA based PCR amplification and denaturing gradient gel electrophoresis (PCR-DGGE) was …	[She, Yuehui; Zhang, Fan; Shu, Fuchang] Yangtze Univ, Coll Chem & Environm Engn, Jinzhou 434023, Peoples R China; [She, Yuehui; Yu, Longjiang] Huazhong Normal Univ Sci & Technol, Coll Life Sci & Technol, Wuhan 430070, Peoples R China; [Zhao, Liping] Shanghai Jiao Tong Univ, Coll Life Sci & Biotechnol, Shanghai 200240, Peoples R China	Yangtze University; Shanghai Jiao Tong University	She, YH (corresponding author), Yangtze Univ, Coll Chem & Environm Engn, Jinzhou 434023, Peoples R China.	sheyuehui@263.net	she, yuehui/HGA-7099-2022		High Tech Development Program of China (863 Project) [2008AA06Z204]	High Tech Development Program of China (863 Project)(National High Technology Research and Development Program of China)	This work was supported by grant 2008AA06Z204 from the High Tech Development Program of China (863 Project).		15	0	0	0	6	IEEE	NEW YORK	345 E 47TH ST, NEW YORK, NY 10017 USA			978-1-4244-2901-1				2009
J	Zhan, YL; Wang, QH; Chen, CM; Kim, JB; Zhang, HD; Yoza, BA; Li, QX				Zhan, Yali; Wang, Qinghong; Chen, Chunmao; Kim, Jung Bong; Zhang, Hongdan; Yoza, Brandon A.; Li, Qing X.			Potential of wheat bran to promote indigenous microbial enhanced oil recovery	JOURNAL OF INDUSTRIAL MICROBIOLOGY & BIOTECHNOLOGY			English	Article						Wheat bran; Biostimulation; Response surface methodology; Indigenous microbial enhanced oil recovery	RESPONSE-SURFACE METHODOLOGY; BIOSURFACTANT PRODUCTION; BACTERIAL COMMUNITY; RIBOSOMAL-RNA; WASTE-WATER; MICROORGANISMS; OPTIMIZATION; FIELD; RESERVOIR; MEOR	Microbial enhanced oil recovery (MEOR) is an emerging oil extraction technology that utilizes microorganisms to facilitate recovery of crude oil in depleted petroleum reservoirs. In the present study, effects of wheat bran utilization were investigated on stimulation of indigenous MEOR. Biostimulation conditions were optimized with the response surface methodology. The co-application of wheat bra…	[Zhan, Yali; Wang, Qinghong; Chen, Chunmao; Zhang, Hongdan] China Univ Petr, State Key Lab Heavy Oil Proc, Beijing 102249, Peoples R China; [Chen, Chunmao; Li, Qing X.] Univ Hawaii Manoa, Dept Mol Biosci & Bioengn, Honolulu, HI 96822 USA; [Kim, Jung Bong] Rural Dev Adm, Natl Inst Agr Sci, Dept Agrofood Resources, Jeonju 55365, South Korea; [Yoza, Brandon A.] Univ Hawaii Manoa, Hawaii Nat Energy I…	China University of Petroleum; University of Hawaii System; University of Hawaii Manoa; National Institute of Agricultural Sciences; Rural Development Administration (RDA); University of Hawaii System; University of Hawaii Manoa	Li, QX (corresponding author), Univ Hawaii Manoa, Dept Mol Biosci & Bioengn, Honolulu, HI 96822 USA.	qingl@hawaii.edu	Li, Qing/AAO-3938-2020		National Natural Science Foundation of China [21306229]; Korean RDA [PJ011884]; Science Foundation of China University of Petroleum, Beijing [2462014YJRC001]	National Natural Science Foundation of China(National Natural Science Foundation of China (NSFC)); Korean RDA; Science Foundation of China University of Petroleum, Beijing	This study was supported in part by the National Natural Science Foundation of China (No. 21306229), the Korean RDA (No. PJ011884) and the Science Foundation of China University of Petroleum, Beijing (2462014YJRC001).		54	3	3	0	31	SPRINGER HEIDELBERG	HEIDELBERG	TIERGARTENSTRASSE 17, D-69121 HEIDELBERG, GERMANY	1367-5435	1476-5535		J IND MICROBIOL BIOT	J. Ind. Microbiol. Biotechnol.	JUN	2017	44	6
J	Xiong, SZ; Li, X; Chen, JF; Zhao, LP; Zhang, H; Zhang, XJ				Xiong, Shunzi; Li, Xia; Chen, Jianfa; Zhao, Liping; Zhang, Hui; Zhang, Xiaojun			Crude oil degradation by bacterial consortia under four different redox and temperature conditions	APPLIED MICROBIOLOGY AND BIOTECHNOLOGY			English	Article						Crude oil; Norhopane; Methanogenic; Sulfate-reducing; Bacterial degradation; Bacterial community	PETROLEUM BIODEGRADATION; COMMUNITY STRUCTURE; METHANE PRODUCTION; DEEP SUBSURFACE; METHANOGENESIS; 25-NORHOPANES; DISTRIBUTIONS; HYDROCARBONS; INDICATORS; DYNAMICS	There is emerging interest in the anaerobic degradation of crude oil. However, there is limited knowledge about the geochemical effects and microbiological activities for it. A mixture of anaerobic sludge and the production water from an oil well was used as an inoculum to construct four consortia, which were incubated under sulfate-reducing or methanogenic conditions at either mesophilic or ther…	[Xiong, Shunzi; Zhao, Liping; Zhang, Xiaojun] Shanghai Jiao Tong Univ, State Key Lab Microbial Metab, Shanghai 200240, Peoples R China; [Xiong, Shunzi; Zhao, Liping; Zhang, Xiaojun] Shanghai Jiao Tong Univ, Sch Life Sci & Biotechnol, Shanghai 200240, Peoples R China; [Li, Xia; Zhang, Hui] Minist Agr, Biogas Inst, Chengdu 610041, Peoples R China; [Chen, Jianfa] China Univ Petr, State Key Lab Petr …	Shanghai Jiao Tong University; Shanghai Jiao Tong University; Chinese Academy of Agricultural Sciences; Biogas Institute of Ministry of Agriculture, CAAS; Ministry of Agriculture & Rural Affairs; China University of Petroleum	Zhang, XJ (corresponding author), Shanghai Jiao Tong Univ, State Key Lab Microbial Metab, Shanghai 200240, Peoples R China.	jfchen@cup.edu.cn; zhanghuits@aliyun.com; xjzhang68@sjtu.edu.cn	Zhang, Xiaojun/E-9521-2016	Zhang, Xiaojun/0000-0002-4559-0177	National Natural Science Foundation of China [NSFC 21177086, 40973059, 31121064]; Shanghai International Collaboration project [12230706800]; China Petroleum & Chemical Corporation (Sinopec)	National Natural Science Foundation of China(National Natural Science Foundation of China (NSFC)); Shanghai International Collaboration project; China Petroleum & Chemical Corporation (Sinopec)	This study was financially supported by the National Natural Science Foundation of China (NSFC 21177086, 40973059 and 31121064), the Shanghai International Collaboration project (12230706800) and by the China Petroleum & Chemical Corporation (Sinopec). We thank Professor Ian M. Head of Newcastle University, UK for critically reading the drafts of this manuscript.		44	10	10	1	92	SPRINGER	NEW YORK	233 SPRING ST, NEW YORK, NY 10013 USA	0175-7598	1432-0614		APPL MICROBIOL BIOT	Appl. Microbiol. Biotechnol.	FEB	2015	99	3
J	Chen, Y; Pan, J; Yun, Y; Zhi, B; Li, GQ; Li, M; Ma, T				Chen, Yu; Pan, Jie; Yun, Yuan; Zhi, Bo; Li, Guoqiang; Li, Meng; Ma, Ting			Halomonas plays a central role in the syntrophic community of an alkaline oil reservoir with alkali-surfactant-polymer (ASP) flooding	SCIENCE OF THE TOTAL ENVIRONMENT			English	Article						Alkane stress; Metagenomic sequencing; Metabolic potential; Survival mechanism; Microbial syntrophic network	CRUDE-OIL; SP-NOV.; GEN.-NOV.; DEGRADING BACTERIUM; PETROLEUM RESERVOIR; MICROBIAL COMMUNITY; HEAVY OIL; PH; WATER; STRAIN	Little is known about the microbial characteristics in oil reservoirs under alkali-surfactant-polymer (ASP)-flooding. In the present study, we collected two ASP-flooding samples and two nearby water-flooding samples from the Daqing oil field and performed 16S rRNA gene sequencing and metagenomic sequencing to fill this knowledge gap. The results indicated that the highly elevated pH resulted in a…	[Chen, Yu; Yun, Yuan; Zhi, Bo; Li, Guoqiang; Ma, Ting] Nankai Univ, Coll Life Sci, Tianjin, Peoples R China; [Pan, Jie; Li, Meng] Shenzhen Univ, Shenzhen Key Lab Marine Microbiome Engn, Inst Adv Study, Shenzhen, Peoples R China	Nankai University; Shenzhen University	Ma, T (corresponding author), Nankai Univ, Coll Life Sci, Tianjin, Peoples R China.; Li, M (corresponding author), Shenzhen Univ, Shenzhen Key Lab Marine Microbiome Engn, Inst Adv Study, Shenzhen, Peoples R China.	limeng848@szu.edu.cn; tingma@nankai.edu.cn	Li, Meng/K-3172-2012	Li, Meng/0000-0001-8675-0758; Yun, Yuan/0000-0001-6537-3527	China National Key Research and Development Plan Project [2018YFA0902101]; NSFC [41773080, 31970105]	China National Key Research and Development Plan Project; NSFC(National Natural Science Foundation of China (NSFC))	This study was supported by the China National Key Research and Development Plan Project (2018YFA0902101) and NSFC project (41773080 and 31970105).		70	6	6	6	40	ELSEVIER	AMSTERDAM	RADARWEG 29, 1043 NX AMSTERDAM, NETHERLANDS	0048-9697	1879-1026		SCI TOTAL ENVIRON	Sci. Total Environ.	DEC 10	2020	747
J	Liu, YC; Zhou, TT; Zhang, J; Xu, L; Zhang, ZH; Shen, QR; Shen, BA				Liu, Yi-Chen; Zhou, Tian-Tian; Zhang, Jian; Xu, Lian; Zhang, Zhen-Hua; Shen, Qi-Rong; Shen, Biao			Molecular characterization of the alkB gene in the thermophilic Geobacillus sp strain MH-1	RESEARCH IN MICROBIOLOGY			English	Article						Biodegradation of crude oil; Isolation and characterization; Thermophilic Geobacillus; alkB	STEAROTHERMOPHILUS NEUTRAL PROTEASE; BACILLUS-STEAROTHERMOPHILUS; SP-NOV; CRUDE-OIL; PETROLEUM RESERVOIRS; THERMOSTABILITY; DEGRADATION; THERMOLEOVORANS; PSEUDOMONAS; BACTERIUM	An extremely thermophilic alkane-degrading bacterium, strain MH-1, was isolated from the deep subterranean petroleum reservoir in Shengli oil field, PR China. Based on its physiological characteristics and analysis of its 16S rRNA gene sequence, strain MH-1 was identified as Geobacillus stearothermophilus. Strain MH-1 was able to grow at temperatures ranging from 50 to 72 degrees C and effectivel…	[Zhou, Tian-Tian; Shen, Qi-Rong; Shen, Biao] Nanjing Agr Univ, Jiangsu Prov Key Lab Organ Solid Waste Utilizat, Nanjing 210095, Peoples R China; [Liu, Yi-Chen; Zhang, Jian; Xu, Lian; Zhang, Zhen-Hua] Nanjing Agr Univ, Minist Agr, Key Lab Microbiol Engn Agr Environm, Nanjing 210095, Peoples R China	Nanjing Agricultural University; Ministry of Agriculture & Rural Affairs; Nanjing Agricultural University	Shen, BA (corresponding author), Nanjing Agr Univ, Jiangsu Prov Key Lab Organ Solid Waste Utilizat, Nanjing 210095, Peoples R China.	shenbiao@njau.edu.cn	liu, yang/HIU-0559-2022; liu, yang/HHY-8583-2022; liu, yichen/GVT-6262-2022; Shen, Qirong/AAB-6531-2020		Chinese National Natural Sciences Fund [30870081]	Chinese National Natural Sciences Fund(National Natural Science Foundation of China (NSFC))	This work was supported by the Chinese National Natural Sciences Fund (Grant No. 30870081).		33	18	21	0	20	ELSEVIER SCIENCE BV	AMSTERDAM	PO BOX 211, 1000 AE AMSTERDAM, NETHERLANDS	0923-2508	1769-7123		RES MICROBIOL	Res. Microbiol.	OCT	2009	160	8
J	de Souza, PM; Goulart, FRD; Marques, JM; Bizzo, HR; Blank, AF; Groposo, C; de Sousa, MP; Volaro, V; Alviano, CS; Moreno, DSA; Seldin, L				de Souza, Pamella Macedo; de Vasconcelos Goulart, Fatima Regina; Marques, Joana Montezano; Bizzo, Humberto Ribeiro; Blank, Arie Fitzgerald; Groposo, Claudia; de Sousa, Maira Paula; Volaro, Vanessa; Alviano, Celuta Sales; Alviano Moreno, Daniela Sales; Seldin, Lucy			Growth Inhibition of Sulfate-Reducing Bacteria in Produced Water from the Petroleum Industry Using Essential Oils	MOLECULES			English	Article						essential oils; antimicrobial activity; sulfate-reducing bacteria (SRB); production water; oil industry	16S RIBOSOMAL-RNA; ANTIBIOTIC-RESISTANCE; SP NOV.; BIOFILMS; MICROORGANISMS; COMPONENTS; RESERVOIR; EXTRACTS; STRAINS; NITRATE	Strategies for the control of sulfate-reducing bacteria (SRB) in the oil industry involve the use of high concentrations of biocides, but these may induce bacterial resistance and/or be harmful to public health and the environment. Essential oils (EO) produced by plants inhibit the growth of different microorganisms and are a possible alternative for controlling SRB. We aimed to characterize the …	[de Souza, Pamella Macedo; de Vasconcelos Goulart, Fatima Regina; Marques, Joana Montezano; Alviano, Celuta Sales; Alviano Moreno, Daniela Sales; Seldin, Lucy] Univ Fed Rio de Janeiro, Inst Microbiol Paulo de Goes, BR-21941590 Rio De Janeiro, Brazil; [Marques, Joana Montezano] Univ Fed Para, Inst Ciencias Biol, BR-66075900 Belem, Para, Brazil; [Bizzo, Humberto Ribeiro] EMBRAPA, Agroind Alimentos,…	Universidade Federal do Rio de Janeiro; Universidade Federal do Para; Empresa Brasileira de Pesquisa Agropecuaria (EMBRAPA); Universidade Federal de Sergipe; Petrobras	Seldin, L (corresponding author), Univ Fed Rio de Janeiro, Inst Microbiol Paulo de Goes, BR-21941590 Rio De Janeiro, Brazil.	pamellaethuany@gmail.com; fatimagoulart@micro.ufrj.br; jomonteza@yahoo.com.br; humberto.bizzo@embrapa.br; afblank@ufs.br; groposo@petrobras.com.br; mpsousa@petrobras.com.br; vvolaro.falcao_bauer@petrobras.com.br; alviano@micro.ufrj.br; danialviano@micro.ufrj.br; lseldin@micro.ufrj.br	Alviano, Daniela/U-1556-2019; Alviano, Celuta/V-3878-2019; Bizzo, Humberto/I-4960-2012; Seldin, Lucy/S-2530-2019; Blank, Arie Fitzgerald/C-7537-2013	Alviano, Celuta/0000-0002-0806-6712; Bizzo, Humberto/0000-0001-5370-6478; Seldin, Lucy/0000-0002-4992-6395; Blank, Arie Fitzgerald/0000-0003-2888-2239	Conselho Nacional de Desenvolvimento Cientifico e Tecnologico (CNPq); Coordenacao de Aperfeicoamento de Pessoal de Nivel Superior (CAPES); Fundacao de Amparo a Pesquisa do Estado do Rio de Janeiro (FAPERJ)	Conselho Nacional de Desenvolvimento Cientifico e Tecnologico (CNPq)(Conselho Nacional de Desenvolvimento Cientifico e Tecnologico (CNPQ)); Coordenacao de Aperfeicoamento de Pessoal de Nivel Superior (CAPES)(Coordenacao de Aperfeicoamento de Pessoal de Nivel Superior (CAPES)); Fundacao de Amparo a Pesquisa do Estado do Rio de Janeiro (FAPERJ)(Fundacao Carlos Chagas Filho de Amparo a Pesquisa do E…	This study was supported by grants from Conselho Nacional de Desenvolvimento Cientifico e Tecnologico (CNPq), Coordenacao de Aperfeicoamento de Pessoal de Nivel Superior (CAPES) and Fundacao de Amparo a Pesquisa do Estado do Rio de Janeiro (FAPERJ).		45	7	8	2	19	MDPI	BASEL	ST ALBAN-ANLAGE 66, CH-4052 BASEL, SWITZERLAND	1420-3049			MOLECULES	Molecules	APR	2017	22	4
J	Pham, VD; Hnatow, LL; Zhang, SP; Fallon, RD; Jackson, SC; Tomb, JF; DeLong, EF; Keeler, SJ				Pham, Vinh D.; Hnatow, Linda L.; Zhang, Shiping; Fallon, Robert D.; Jackson, Scott C.; Tomb, Jean-Francois; DeLong, Edward F.; Keeler, Sharon J.			Characterizing microbial diversity in production water from an Alaskan mesothermic petroleum reservoir with two independent molecular methods	ENVIRONMENTAL MICROBIOLOGY			English	Article							16S RIBOSOMAL-RNA; SULFATE-REDUCING BACTERIA; CRUDE-OIL BIODEGRADATION; HIGH-TEMPERATURE; PHYLOGENETIC DIVISION; FIELD; SUBSURFACE; SEQUENCES; COMMUNITY; LIBRARIES	The phylogenetic diversity of Bacteria and Archaea within a biodegraded, mesothermic petroleum reservoir in the Schrader Bluff Formation of Alaska was examined by two culture-independent methods based on fosmid and small-subunit rRNA gene PCR clone libraries. Despite the exclusion of certain groups by each method, there was overall no significant qualitative difference in the diversity of phyloty…	[Hnatow, Linda L.; Zhang, Shiping; Fallon, Robert D.; Jackson, Scott C.; Tomb, Jean-Francois; Keeler, Sharon J.] DuPont Co Inc, Cent Res & Dev, Wilmington, DE 19880 USA; [Pham, Vinh D.; DeLong, Edward F.] MIT, Dept Civil & Environm Engn, Cambridge, MA 02139 USA	DuPont; Massachusetts Institute of Technology (MIT)	Keeler, SJ (corresponding author), DuPont Co Inc, Cent Res & Dev, Wilmington, DE 19880 USA.	delong@mit.edu; sharon.j.keeler@usa.dupont.com							50	135	144	1	35	WILEY-BLACKWELL	MALDEN	COMMERCE PLACE, 350 MAIN ST, MALDEN 02148, MA USA	1462-2912			ENVIRON MICROBIOL	Environ. Microbiol.	JAN	2009	11	1
J	Liu, HJ; Yao, J; Yuan, ZM; Shang, YF; Chen, HL; Wang, F; Masakorala, K; Yu, C; Cai, MM; Blake, RE; Choi, MMF				Liu, Haijun; Yao, Jun; Yuan, Zhimin; Shang, Yifan; Chen, Huilun; Wang, Fei; Masakorala, Kanaji; Yu, Chan; Cai, Minmin; Blake, Ruth E.; Choi, Martin M. F.			Isolation and characterization of crude-oil-degrading bacteria from oil-water mixture in Dagang oilfield, China	INTERNATIONAL BIODETERIORATION & BIODEGRADATION			English	Article						Acinetobacter; Alkane hydroxylase gene; Crude oil; Degradation; Thermal effect	ALKANE HYDROXYLASE GENES; MICROBIAL COMMUNITIES; DEGRADATION; STRAIN; SOILS; HYDROCARBONS; DIVERSITY; ELEMENTS; ALKB	Isolating novel crude-oil-degrading bacteria from oil-water mixture of oil production well and evaluating their degradation capacities are vitally important in the remediation of oil-polluted environments and crude oil exploitation. According to the molecular screening with degenerate primers of alkane hydroxylase gene (alk B), a strain Acinetobacter sp. LS-1 with alk B gene was isolated. This st…	[Liu, Haijun; Yao, Jun; Yuan, Zhimin; Shang, Yifan; Chen, Huilun; Wang, Fei; Masakorala, Kanaji; Yu, Chan; Cai, Minmin] Univ Sci & Technol Beijing, Sch Civil & Environm Engn, Beijing 100083, Peoples R China; [Liu, Haijun; Yao, Jun; Yuan, Zhimin; Shang, Yifan; Chen, Huilun; Wang, Fei; Masakorala, Kanaji; Yu, Chan; Cai, Minmin] Univ Sci & Technol Beijing, Natl Int Cooperat Base Environm & Energy, B…	University of Science & Technology Beijing; University of Science & Technology Beijing; China University of Geosciences; China University of Geosciences; University Ruhuna; Yale University; Hong Kong Baptist University	Yao, J (corresponding author), Univ Sci & Technol Beijing, Sch Civil & Environm Engn, 30 Xueyuan Rd, Beijing 100083, Peoples R China.	yaojun@ustb.edu.cn; mfchoi@hkbu.edu.hk	chen, hui/HDO-2955-2022		National Outstanding Youth Research Foundation of China [40925010]; National Natural Science Foundation of China [40920134003, 41273092, 41103060, 41103058]; Chinese Ministry of Science and Technology [2010DFB23160]	National Outstanding Youth Research Foundation of China; National Natural Science Foundation of China(National Natural Science Foundation of China (NSFC)); Chinese Ministry of Science and Technology(Ministry of Science and Technology, China)	This work is supported in part by grants from the National Outstanding Youth Research Foundation of China (40925010), International Joint Key Project from National Natural Science Foundation of China (40920134003), International Joint Key Project from Chinese Ministry of Science and Technology (2010DFB23160), National Natural Science Foundation of China (41273092, 41103060, 41103058). We express …		39	36	39	1	69	ELSEVIER SCI LTD	OXFORD	THE BOULEVARD, LANGFORD LANE, KIDLINGTON, OXFORD OX5 1GB, OXON, ENGLAND	0964-8305	1879-0208		INT BIODETER BIODEGR	Int. Biodeterior. Biodegrad.	FEB	2014	87
J	Wilhelms, A; Larter, SR; Head, I; Farrimond, P; di-Primo, R; Zwach, C				Wilhelms, A; Larter, SR; Head, I; Farrimond, P; di-Primo, R; Zwach, C			Biodegradation of oil in uplifted basins prevented by deep-burial sterilization (vol 411, pg 1034, 2001)	NATURE			English	Correction							HELICOBACTER-PYLORI UREASE; ESCHERICHIA-COLI; COMPLETE GENOME; RNA-POLYMERASE; NORTH-SEA; PROTEIN; SEQUENCE; ARCHAEA; YEAST; LIFE	Biodegradation of crude oil by bacterial activity-which has occurred in the majority of the Earth's oil reserves(1)-is known to reduce greatly the quality of petroleum in reservoirs(2). For economically successful prospecting for oil, it is therefore important to understand the processes and conditions in geological formations that lead to oil biodegradation. Although recent studies speculate tha…	Newcastle Univ, Fossil Fuels & Environm Geochem Postgrad Inst NRG, Newcastle Upon Tyne NE1 7RU, Tyne & Wear, England; Norsk Hydro AS, Res Ctr, N-5020 Bergen, Norway	Newcastle University - UK; Norsk Hydro ASA	Wilhelms, A (corresponding author), Newcastle Univ, Fossil Fuels & Environm Geochem Postgrad Inst NRG, Newcastle Upon Tyne NE1 7RU, Tyne & Wear, England.								55	0	0	0	17	NATURE RESEARCH	BERLIN	HEIDELBERGER PLATZ 3, BERLIN, 14197, GERMANY	0028-0836	1476-4687		NATURE	Nature	NOV 01	2001	414	6859
J	Li, GQ; Gao, PK; Wu, YQ; Tian, HM; Dai, XC; Wang, YS; Cui, QF; Zhang, HZ; Pan, XX; Dong, HP; Ma, T				Li, Guoqiang; Gao, Peike; Wu, Yunqiang; Tian, Huimei; Dai, Xuecheng; Wang, Yansen; Cui, Qingfeng; Zhang, Hongzuo; Pan, Xiaoxuan; Dong, Hanping; Ma, Ting			Microbial Abundance and Community Composition Influence Production Performance in a Low-Temperature Petroleum Reservoir	ENVIRONMENTAL SCIENCE & TECHNOLOGY			English	Article							CRUDE-OIL; DEGRADING BACTERIA; WATER; DIVERSITY; QUANTIFICATION; SUCCESSION; SEQUENCES; RECOVERY; NITRATE	Enhanced oil recovery using indigenous microorganisms has been successfully applied in the petroleum industry, but the role of microorganisms remains poorly understood. Here, we investigated the relationship between microbial population dynamics and oil production performance during a water flooding process coupled with nutrient injection in a low-temperature petroleum reservoir. Samples were col…	[Li, Guoqiang; Gao, Peike; Tian, Huimei; Wang, Yansen; Zhang, Hongzuo; Pan, Xiaoxuan; Ma, Ting] Nankai Univ, Minist Educ, Key Lab Mol Microbiol & Technol, Tianjin 300071, Peoples R China; [Li, Guoqiang; Ma, Ting] Nankai Univ, Coll Life Sci, Tianjin 300071, Peoples R China; [Wu, Yunqiang; Dai, Xuecheng] Xinjiang Oilfield Co, Expt & Test Inst, Karamay 834000, Peoples R China; [Cui, Qingfeng; Dong, …	Nankai University; Nankai University; China National Petroleum Corporation	Ma, T (corresponding author), Nankai Univ, Minist Educ, Key Lab Mol Microbiol & Technol, Tianjin 300071, Peoples R China.	tingma@nankai.edu.cn	gao, peike/AAC-2445-2021	tian, huimei/0000-0002-9588-2178; Gao, Peike/0000-0002-0320-8187; Li, Guoqiang/0000-0001-7147-7306	National High Technology Research and Development Program of China [2009AA063502, 2013AA064402]; National Natural Science Foundation of China [31170075, 41373074]; Xinjiang Oilfield Company; Research Institute of Petroleum Exploitation and Development (Langfang), PetroChina	National High Technology Research and Development Program of China(National High Technology Research and Development Program of China); National Natural Science Foundation of China(National Natural Science Foundation of China (NSFC)); Xinjiang Oilfield Company; Research Institute of Petroleum Exploitation and Development (Langfang), PetroChina	This study was supported by grants from the National High Technology Research and Development Program of China (2009AA063502, 2013AA064402) and the National Natural Science Foundation of China (31170075, 41373074). The field pilot was sponsored by Xinjiang Oilfield Company and Research Institute of Petroleum Exploitation and Development (Langfang), PetroChina.		35	43	61	4	101	AMER CHEMICAL SOC	WASHINGTON	1155 16TH ST, NW, WASHINGTON, DC 20036 USA	0013-936X	1520-5851		ENVIRON SCI TECHNOL	Environ. Sci. Technol.	MAY 6	2014	48	9
J	Shestakova, NM; Korshunova, AV; Mikhailova, EM; Sokolova, DS; Tourova, TP; Belyaev, SS; Poltaraus, AB; Nazina, TN				Shestakova, N. M.; Korshunova, A. V.; Mikhailova, E. M.; Sokolova, D. Sh.; Tourova, T. P.; Belyaev, S. S.; Poltaraus, A. B.; Nazina, T. N.			Characterization of the Aerobic Hydrocarbon-Oxidizing Enrichments from a High-Temperature Petroleum Reservoir by Comparative Analysis of DNA- and RNA-Derived Clone Libraries	MICROBIOLOGY			English	Article						Geobacillus; Shewanella; Pannonibacter; thermophiles; alkB genes; 16S rRNA genes; 16S crDNA; n-alkane oxidation; oil fields	16S RIBOSOMAL DNA; SP NOV.; OIL; GEOBACILLUS; DIVERSITY; COMMUNITY; THERMODENITRIFICANS; AMPLIFICATION; DEGRADATION; GENES	Enrichment cultures of aerobic hydrocarbon-oxidizing bacteria obtained from the injection and production wells of the Dagang oil field (China) were studied by molecular biological and microbiological methods. This work is the first to report simultaneous isolation of DNA and RNA from enrichment cultures of microorganisms from oil strata with further construction of clone libraries of 16S rRNA gen…	[Shestakova, N. M.; Mikhailova, E. M.; Sokolova, D. Sh.; Tourova, T. P.; Belyaev, S. S.; Nazina, T. N.] Russian Acad Sci, Winogradsky Inst Microbiol, Moscow 117312, Russia; [Korshunova, A. V.] Moscow MV Lomonosov State Univ, Fac Bioengn & Bioinformat, Moscow 119991, Russia; [Poltaraus, A. B.] Russian Acad Sci, VA Engelhardt Mol Biol Inst, Moscow 119991, Russia	Research Center of Biotechnology RAS; Russian Academy of Sciences; Lomonosov Moscow State University; Russian Academy of Sciences; Engelhardt Institute of Molecular Biology, RAS	Nazina, TN (corresponding author), Russian Acad Sci, Winogradsky Inst Microbiol, Pr 60 Letiya Oktyabrya 7,K 2, Moscow 117312, Russia.	nazina@inmi.host.ru	Nazina, Tamara N/Q-2965-2016; Sokolova, Diyana/P-6983-2018	Nazina, Tamara N/0000-0002-6586-2467; Sokolova, Diyana/0000-0003-2422-4423; Semenova, Ekaterina/0000-0001-5299-7656	Russian Foundation for Basic Research [05-04-39029, 06-04-49128]; Ministry of Education and Science of the Russian Federation [NSh 4174.2008.4, 02.552.11.7073]; Presidium of the Russian Academy of Sciences [14, 23]	Russian Foundation for Basic Research(Russian Foundation for Basic Research (RFBR)); Ministry of Education and Science of the Russian Federation(Ministry of Education and Science, Russian Federation); Presidium of the Russian Academy of Sciences(Russian Academy of Sciences)	This work was supported by the Russian Foundation for Basic Research (projects nos. 05-04-39029 and 06-04-49128); the Ministry of Education and Science of the Russian Federation (grants nos. NSh 4174.2008.4 and 02.552.11.7073); and by the programs no. 14, no. 23, and "Molecular and Cell Biology" of the Presidium of the Russian Academy of Sciences.		31	18	20	0	19	MAIK NAUKA/INTERPERIODICA/SPRINGER	NEW YORK	233 SPRING ST, NEW YORK, NY 10013-1578 USA	0026-2617	1608-3237		MICROBIOLOGY+	Microbiology	FEB	2011	80	1
J	Pannekens, M; Voskuhl, L; Mohammadian, S; Koster, D; Meier, A; Kohne, JM; Kulbatzki, M; Akbari, A; Haque, S; Meckenstock, RU				Pannekens, Mark; Voskuhl, Lisa; Mohammadian, Sadjad; Koester, Daniel; Meier, Arne; Koehne, John M.; Kulbatzki, Michelle; Akbari, Ali; Haque, Shirin; Meckenstock, Rainer U.			Microbial Degradation Rates of Natural Bitumen	ENVIRONMENTAL SCIENCE & TECHNOLOGY			English	Article						asphalt; oil reservoirs; micro habitats; water droplets; isotope dilution; anaerobic biodegradation; petroleum mineralization; biofilm formation	MIDINFRARED LASER SPECTROSCOPY; SULFATE-REDUCING BACTERIA; ISOTOPE LABELING ANALYSIS; CRUDE-OIL BIODEGRADATION; DEEP SUBSURFACE; HYDROCARBON DEGRADATION; CHEMICAL COMPOSITION; ATHABASCA BITUMEN; GEN. NOV.; PETROLEUM	Microorganisms are present in nearly every oil or bitumen sample originating from temperate reservoirs. Nevertheless, it is very difficult to obtain reliable estimates about microbial processes taking place in deep reservoirs, since metabolic rates are rather low and differ strongly during artificially cultivation. Here, we demonstrate the importance and impact of microorganisms entrapped in micr…	[Pannekens, Mark; Voskuhl, Lisa; Mohammadian, Sadjad; Meier, Arne; Kulbatzki, Michelle; Akbari, Ali; Meckenstock, Rainer U.] Univ Duisburg Essen, Aquat Microbiol, Environm Microbiol & Biotechnol, D-45141 Essen, Germany; [Koester, Daniel] Univ Duisburg Essen, Instrumental Analyt Chem, D-45141 Essen, Germany; [Koehne, John M.] Helmholtz Ctr Environm Res, Dept Soil Syst Sci, D-06120 Halle, Germany; …	University of Duisburg Essen; University of Duisburg Essen; Helmholtz Association; Helmholtz Center for Environmental Research (UFZ); University West Indies Mona Jamaica; University West Indies Saint Augustine	Meckenstock, RU (corresponding author), Univ Duisburg Essen, Aquat Microbiol, Environm Microbiol & Biotechnol, D-45141 Essen, Germany.	rainer.meckenstock@uni-due.de		Koster, Daniel/0000-0002-2920-8900; Voskuhl, Lisa/0000-0001-5776-5491	ERC advanced grant EcOILogy - European Research Council [666952]; German Research Foundation [BR 5493/1-1]; EU Horizon 2020 project Reground [641768]	ERC advanced grant EcOILogy - European Research Council; German Research Foundation(German Research Foundation (DFG)); EU Horizon 2020 project Reground	This work was supported by the ERC advanced grant EcOILogy [grant number 666952] funded by the European Research Council and the German Research Foundation [grant number BR 5493/1-1], and the EU Horizon 2020 project Reground [grant number 641768].		80	2	2	3	22	AMER CHEMICAL SOC	WASHINGTON	1155 16TH ST, NW, WASHINGTON, DC 20036 USA	0013-936X	1520-5851		ENVIRON SCI TECHNOL	Environ. Sci. Technol.	JUL 6	2021	55	13
J	Bachmann, RT; Johnson, AC; Edyvean, RGJ				Bachmann, Robert Thomas; Johnson, Anbu Clemensis; Edyvean, Robert G. J.			Biotechnology in the petroleum industry: An overview	INTERNATIONAL BIODETERIORATION & BIODEGRADATION			English	Review						Microbially enhanced oil recovery (MEOR); Biosurfactants; Biodesulfurization; Biodemetallation; Biodenitrogenation; Biotransformation	ENHANCED OIL-RECOVERY; HYDRODESULFURIZED MIDDLE DISTILLATE; ORGANIC SULFUR-COMPOUNDS; MICROBIAL DESULFURIZATION; BIOSURFACTANT PRODUCTION; CRUDE-OIL; RHODOCOCCUS-ERYTHROPOLIS; POTENTIAL APPLICATIONS; BACILLUS STRAIN; DIESEL OILS	A significant quantum of crude oil is trapped in reservoirs and often unrecoverable by conventional oil recovery methods. Further downstream, the petroleum industry is facing challenges to remove sulfur, metal, nitrogen as well as undesirable organic compounds from the crude. Conventional secondary recovery methods such as water and gas injections helped to increase the productivity of the well, …	[Bachmann, Robert Thomas] Univ Kuala Lumpur, Malaysian Inst Chem & Bioengn Technol, Alor Gajah 78000, Malaysia; [Johnson, Anbu Clemensis] Caledonian Coll Engn, Dept Mech & Ind Engn, Muscat, Oman; [Edyvean, Robert G. J.] Univ Sheffield, Dept Chem & Biol Engn, Sheffield S1 3JD, S Yorkshire, England	University of Kuala Lumpur; National University of Science & Technology, Oman; University of Sheffield	Johnson, AC (corresponding author), Caledonian Coll Engn, Dept Mech & Ind Engn, POB 2322,CPO Seeb 111, Muscat, Oman.	acj265@yahoo.com	Bachmann, Robert Thomas/B-8801-2009	Bachmann, Robert Thomas/0000-0001-7636-5338					184	113	120	2	201	ELSEVIER SCI LTD	OXFORD	THE BOULEVARD, LANGFORD LANE, KIDLINGTON, OXFORD OX5 1GB, OXON, ENGLAND	0964-8305	1879-0208		INT BIODETER BIODEGR	Int. Biodeterior. Biodegrad.	JAN	2014	86		C
J	Zheng, XC; Lin, XS; Yang, YR; Wen, YP; Shi, YM; Xie, XF; Hou, AX; Lai, NJ				Zheng, Xuecheng; Lin, Xiaosha; Yang, Yuru; Wen, Yiping; Shi, Yaoming; Xie, Xiaofeng; Hou, Anxin; Lai, Nanjun			Effect of Reservoir Salinity between Bioacid and Carbonate Rock Based on Biometabolic Analysis	ENERGY & FUELS			English	Article							ENHANCED OIL-RECOVERY; PETROLEUM; MICROORGANISMS; SURFACE; KEGG	Acidic fluids produced by microbial metabolism, such as organic acids, can effectively increase the porosity and permeability of carbonate rocks, thus improving oil recovery. In this experiment, facultative anaerobic strains utilizing crude oil as the sole carbon source were screened out. Acid production from crude oil was determined, and their physiological and biochemical properties and gene ex…	[Zheng, Xuecheng; Lin, Xiaosha; Yang, Yuru; Wen, Yiping; Shi, Yaoming; Xie, Xiaofeng; Hou, Anxin; Lai, Nanjun] Southwest Petr Univ, Dept Chem & Chem Engn, 8 Xindu Rd, Chengdu 610500, Sichuan, Peoples R China; [Zheng, Xuecheng; Lai, Nanjun] Chengdu Univ Technol, State Key Lab Oil & Gas Reservoir Geol & Exploita, Chengdu 610059, Sichuan, Peoples R China	Southwest Petroleum University; Chengdu University of Technology	Zheng, XC; Lai, NJ (corresponding author), Southwest Petr Univ, Dept Chem & Chem Engn, 8 Xindu Rd, Chengdu 610500, Sichuan, Peoples R China.; Zheng, XC; Lai, NJ (corresponding author), Chengdu Univ Technol, State Key Lab Oil & Gas Reservoir Geol & Exploita, Chengdu 610059, Sichuan, Peoples R China.	xc.zbeng@swpu.edu.cn; lainanjun@126.com		xiaosha, lin/0000-0002-8856-9714	Open Fund of state Key Laboratory Oil and Gas Reservoir Geology and Exploitation (Chengdu University of Technology) [PLC20180803]; National Natural Science Foundation of China [51804265, 51674208]; Research project of Nanchong Science and Technology Bureau [NC17SY4025]; Sichuan Province Science and Technology Innovation Young Plant Project [2019078]; Extracurricular Open Experiment of Southwest P…	Open Fund of state Key Laboratory Oil and Gas Reservoir Geology and Exploitation (Chengdu University of Technology); National Natural Science Foundation of China(National Natural Science Foundation of China (NSFC)); Research project of Nanchong Science and Technology Bureau; Sichuan Province Science and Technology Innovation Young Plant Project; Extracurricular Open Experiment of Southwest Petrol…	The work was supported by the Open Fund (no. PLC20180803) of state Key Laboratory Oil and Gas Reservoir Geology and Exploitation (Chengdu University of Technology), National Natural Science Foundation of China (no. 51804265, no.51674208). Research project of Nanchong Science and Technology Bureau (no. NC17SY4025). Sichuan Province Science and Technology Innovation Young Plant Project (no. 2019078…		23	1	1	2	25	AMER CHEMICAL SOC	WASHINGTON	1155 16TH ST, NW, WASHINGTON, DC 20036 USA	0887-0624	1520-5029		ENERG FUEL	Energy Fuels	SEP	2019	33	9
J	Zhang, YQ; Chen, DL; Ennis, AC; Polli, JR; Xiao, P; Zhang, BH; Stellwag, EJ; Overton, A; Pan, XP				Zhang, Yanqiong; Chen, Dongliang; Ennis, Adrien C.; Polli, Joseph R.; Xiao, Peng; Zhang, Baohong; Stellwag, Edmund J.; Overton, Anthony; Pan, Xiaoping			Chemical dispersant potentiates crude oil impacts on growth, reproduction, and gene expression in Caenorhabditis elegans	ARCHIVES OF TOXICOLOGY			English	Article						Deepwater horizon (DWH) oil spill; C. elegans; Toxicity; Growth; Reproduction; Gene expression	EGG-LAYING BEHAVIOR; NICOTINIC ACETYLCHOLINE-RECEPTORS; POLYCYCLIC AROMATIC-HYDROCARBONS; GULF-OF-MEXICO; C-ELEGANS; OXIDATIVE STRESS; NEUROMUSCULAR-JUNCTION; ACUTE INHALATION; WEATHERED CRUDE; COREXIT EC9500A	The economic, environmental, and human health impacts of the deepwater horizon (DWH) oil spill have been of significant concern in the general public and among scientists. This study employs parallel experiments to test the effects of crude oil from the DWH oil well, chemical dispersant Corexit 9500A, and dispersant-oil mixture on growth and reproduction in the model organism Caenorhabditis elega…	[Zhang, Yanqiong; Chen, Dongliang; Ennis, Adrien C.; Polli, Joseph R.; Zhang, Baohong; Stellwag, Edmund J.; Overton, Anthony; Pan, Xiaoping] E Carolina Univ, Dept Biol, Greenville, NC 27858 USA; [Xiao, Peng] E Carolina Univ, Dept Math, Greenville, NC 27858 USA	University of North Carolina; East Carolina University; University of North Carolina; East Carolina University	Pan, XP (corresponding author), E Carolina Univ, Dept Biol, N108 Howell Sci Complex, Greenville, NC 27858 USA.	Panx@ecu.edu	Zhang, Baohong/O-4948-2016		NSF Rapid Grant BIO IOS [1058975]; East Carolina University New Faculty Startup Funds; Division Of Integrative Organismal Systems [1058975] Funding Source: National Science Foundation	NSF Rapid Grant BIO IOS; East Carolina University New Faculty Startup Funds; Division Of Integrative Organismal Systems(National Science Foundation (NSF)NSF - Directorate for Biological Sciences (BIO))	This work is partially supported by the grant from NSF Rapid Grant BIO IOS# 1058975) and partially by the East Carolina University New Faculty Startup Funds.		68	23	36	1	110	SPRINGER HEIDELBERG	HEIDELBERG	TIERGARTENSTRASSE 17, D-69121 HEIDELBERG, GERMANY	0340-5761	1432-0738		ARCH TOXICOL	Arch. Toxicol.	FEB	2013	87	2
J	de Oliveira, VM; Sette, LD; Simioni, KCM; Neto, EVD				de Oliveira, Valeria Maia; Sette, Lara Duraes; Marques Simioni, Karen Christina; dos Santos Neto, Eugenio Vaz			BACTERIAL DIVERSITY CHARACTERIZATION IN PETROLEUM SAMPLES FROM BRAZILIAN RESERVOIRS	BRAZILIAN JOURNAL OF MICROBIOLOGY			English	Article						bacterial diversity; community DNA; cultivation-independent analysis; petroleum; 16S rDNA	16S RIBOSOMAL-RNA; SULFATE-REDUCING BACTERIA; MICROBIAL COMMUNITIES; NORTH-SEA; SP-NOV; OIL; HYDROCARBONS; GENES; ALICYCLOBACILLUS; BIOREMEDIATION	This study aimed at evaluating potential differences among the bacterial communities from formation water and oil samples originated from biodegraded and non-biodegraded Brazilian petroleum reservoirs by using a PCR-DGGE based approach. Environmental DNA was isolated and used in PCR reactions with bacterial primers, followed by separation of 16S rDNA fragments in the DGGE. PCR products were also …	[dos Santos Neto, Eugenio Vaz] Petrobas R&D Ctr, Rio De Janeiro, Brazil; [de Oliveira, Valeria Maia; Sette, Lara Duraes; Marques Simioni, Karen Christina] Univ Estadual Campinas, Ctr Pluridisciplinar Pesquisas Quim Biol & Agr, Campinas, SP, Brazil	Universidade Estadual de Campinas	de Oliveira, VM (corresponding author), Univ Estadual Campinas, Ctr Pluridisciplinar Pesquisas Quim Biol & Agr CP, CP 6171, BR-13081970 Campinas, SP, Brazil.	vmaia@cpqba.unicamp.br	Oliveira, Valéria Maia/L-2422-2014	Oliveira, Valéria Maia/0000-0001-8817-4758; Sette, Lara/0000-0002-5980-3786	Brazilian National Research Council (CNPq); Petrobras; FINEP	Brazilian National Research Council (CNPq)(Conselho Nacional de Desenvolvimento Cientifico e Tecnologico (CNPQ)); Petrobras(Fundacao de Amparo a Pesquisa do Amapa (FAPEAP)Petrobras); FINEP(Financiadora de Inovacao e Pesquisa (Finep))	D. S. and K. C. M. S. were supported by grants from Brazilian National Research Council (CNPq) in the CTPetro Program. We also thank Petrobras and FINEP for financial support.		45	19	20	0	20	SPRINGER	NEW YORK	ONE NEW YORK PLAZA, SUITE 4600, NEW YORK, NY, UNITED STATES	1517-8382	1678-4405		BRAZ J MICROBIOL	Braz. J. Microbiol.	JUL-SEP	2008	39	3
J	Liu, JF; Lu, YW; Zhou, L; Li, W; Hou, ZW; Yang, SZ; Wu, XL; Gu, JD; Mu, BZ				Liu, Jin-Feng; Lu, Yu-Wei; Zhou, Lei; Li, Wei; Hou, Zhao-Wei; Yang, Shi-Zhong; Wu, Xiao-Lin; Gu, Ji-Dong; Mu, Bo-Zhong			Simultaneous detection of transcribed functional assA gene and the corresponding metabolites of linear alkanes (C-4, C-5, and C-7) in production water of a low-temperature oil reservoir	SCIENCE OF THE TOTAL ENVIRONMENT			English	Article						Oil reservoir; Biodegradation; Methanogenesis; Fumarate addition; Transcripts; Alkanes	MICROBIAL COMMUNITIES; ARCHAEAL COMMUNITY; METHANE FORMATION; DEGRADATION; DIVERSITY; FIELD; BIODEGRADATION; METHANOGENESIS; HYDROCARBONS; GROUNDWATER	Methanogenic hydrocarbon degradation is an important biogeochemical process in oil reservoirs; however, genomic DNA-based analysis of microorganisms and metabolite detection are not conclusive for identification of the ongoing nature of this bioprocess. In this study, a suite of analyses, involving the study of microbial community and selective gene quantification of both genomic DNA and RNA toge…	[Liu, Jin-Feng; Lu, Yu-Wei; Zhou, Lei; Yang, Shi-Zhong; Mu, Bo-Zhong] East China Univ Sci & Technol, State Key Lab Bioreactor Engn, Sch Chem & Mol Engn, Shanghai 200237, Peoples R China; [Li, Wei; Hou, Zhao-Wei; Wu, Xiao-Lin] PetroChina, Explorat & Dev Res Inst, Daqing Oilfield Co Ltd, Daqing 163712, Heilongjiang, Peoples R China; [Gu, Ji-Dong] Univ Hong Kong, Sch Biol Sci, Pokfulam Rd, Hong Kong…	East China University of Science & Technology; China National Petroleum Corporation; Daqing Oilfield Company Limited; Sinopec; University of Hong Kong; East China University of Science & Technology	Mu, BZ (corresponding author), East China Univ Sci & Technol, State Key Lab Bioreactor Engn, Sch Chem & Mol Engn, Shanghai 200237, Peoples R China.	bzmu@ecust.edu.cn	Mu, Bo-Zhong/F-4704-2017; /D-3086-2009	Mu, Bo-Zhong/0000-0002-9564-4970; /0000-0002-7082-9784; Zhou, Lei/0000-0002-9301-7770	National Science Foundation of China [41673084, 41530318]; Shanghai International Collaboration Program [18230743300]; Fundamental Research Funds for the Central Universities [JKJ012016028]	National Science Foundation of China(National Natural Science Foundation of China (NSFC)); Shanghai International Collaboration Program; Fundamental Research Funds for the Central Universities(Fundamental Research Funds for the Central Universities)	We are grateful to themanagement of Daqing Oil Field for sampling support. This work was supported by the National Science Foundation of China (41673084, 41530318), the Shanghai International Collaboration Program (18230743300), the Fundamental Research Funds for the Central Universities (222201817017, 22221818014), and the Fundamental Research Funds for the Central Universities(No. JKJ012016028)		65	3	3	1	26	ELSEVIER	AMSTERDAM	RADARWEG 29, 1043 NX AMSTERDAM, NETHERLANDS	0048-9697	1879-1026		SCI TOTAL ENVIRON	Sci. Total Environ.	DEC 1	2020	746
J	Grouzdev, DS; Sokolova, DS; Poltaraus, AB; Nazina, TN				Grouzdev, Denis S.; Sokolova, Diyana S.; Poltaraus, Andrey B.; Nazina, Tamara N.			Draft Genome Sequence of Halomonas titanicae Strain TAT1, a Hydrocarbon-Oxidizing Halophilic Bacterium Isolated from a Petroleum Reservoir in Russia	MICROBIOLOGY RESOURCE ANNOUNCEMENTS			English	Article								The draft genome sequence of a moderately halophilic bacterium, Halomonas titanicae strain TAT1, isolated from production water of the Romashkinskoe oilfield (Russia) is presented. The genome is annotated for elucidation of the metabolic pathways involved in hydrocarbon degradation and nitrate reduction in petroleumcontaminated hypersaline environments.	[Grouzdev, Denis S.] SciBear LLC, Tallinn, Estonia; [Sokolova, Diyana S.; Nazina, Tamara N.] Russian Acad Sci, Res Ctr Biotechnol, Winogradsky Inst Microbiol, Moscow, Russia; [Poltaraus, Andrey B.] Russian Acad Sci, Engelhardt Inst Mol Biol, Moscow, Russia	Research Center of Biotechnology RAS; Russian Academy of Sciences; Russian Academy of Sciences; Engelhardt Institute of Molecular Biology, RAS	Nazina, TN (corresponding author), Russian Acad Sci, Res Ctr Biotechnol, Winogradsky Inst Microbiol, Moscow, Russia.	nazina@inmi.ru	Sokolova, Diyana/P-6983-2018; Nazina, Tamara/Q-2965-2016; Grouzdev, Denis/K-2114-2018	Nazina, Tamara/0000-0002-6586-2467; Sokolova, Diyana/0000-0003-2422-4423; Grouzdev, Denis/0000-0002-1358-5146	Russian Science Foundation (RSF) [16-14-00028]	Russian Science Foundation (RSF)(Russian Science Foundation (RSF))	Work on genome sequencing was supported by the Russian Science Foundation (RSF) through grant 16-14-00028. The funder had no role in the study design, data collection and interpretation, or the decision to submit the work for publication.		13	3	3	3	6	AMER SOC MICROBIOLOGY	WASHINGTON	1752 N ST NW, WASHINGTON, DC 20036-2904 USA	2576-098X			MICROBIOL RESOUR ANN	Microbiol. Resour. Ann.	NOV	2020	9	48
J	Singh, NK; Choudhary, S				Singh, Nishi Kumari; Choudhary, Sangeeta			Bacterial and archaeal diversity in oil fields and reservoirs and their potential role in hydrocarbon recovery and bioprospecting	ENVIRONMENTAL SCIENCE AND POLLUTION RESEARCH			English	Review						Bacterial diversity; Hydrocarbon; Degradation; Petroleum; Oil reservoirs; Geomicrobial prospecting	THIOSULFATE-REDUCING BACTERIUM; POLYCYCLIC AROMATIC-HYDROCARBONS; SP-NOV.; GEN.-NOV.; CRUDE-OIL; MICROBIAL DIVERSITY; HIGH-TEMPERATURE; BIOSURFACTANT PRODUCTION; PSEUDOMONAS-AERUGINOSA; THERMOPHILIC BACTERIUM	Hydrocarbon is a primary source of energy in the current urbanized society. Considering the increasing demand, worldwide oil productions are declining due to maturity of oil fields and because of difficulty in discovering new oil fields to substitute the exploited ones. To meet current and future energy demands, further exploitation of oil resources is highly required. Microorganisms inhabiting i…	[Singh, Nishi Kumari; Choudhary, Sangeeta] Banasthali Vidyapith, Dept Biosci & Biotechnol, Vanasthali 304022, Rajasthan, India	Banasthali Vidyapith	Choudhary, S (corresponding author), Banasthali Vidyapith, Dept Biosci & Biotechnol, Vanasthali 304022, Rajasthan, India.	sangeeta25@gmail.com	Choudhary, Sangeeta/GYU-1487-2022; Choudhary, Sangeeta/H-3820-2019	Choudhary, Sangeeta/0000-0003-4421-2294; Choudhary, Sangeeta/0000-0003-4421-2294					171	6	7	4	29	SPRINGER HEIDELBERG	HEIDELBERG	TIERGARTENSTRASSE 17, D-69121 HEIDELBERG, GERMANY	0944-1344	1614-7499		ENVIRON SCI POLLUT R	Environ. Sci. Pollut. Res.	NOV	2021	28	42
J	Ahmadi, MA; Zendehboudi, S; James, LA; Elkamel, A; Dusseault, M; Chatzis, I; Lohi, A				Ahmadi, Mohammad Ali; Zendehboudi, Sohrab; James, Lesley A.; Elkamel, Ali; Dusseault, Maurice; Chatzis, Ioannis; Lohi, Ali			New tools to determine bubble point pressure of crude oils: Experimental and modeling study	JOURNAL OF PETROLEUM SCIENCE AND ENGINEERING			English	Article						experimental study; bubble point pressure; gene expression programming; crude oil; predictive tools	DYNAMIC SURFACE-TENSION; NEURAL-NETWORK; VOLUMETRIC PROPERTIES; PHASE-BEHAVIOR; PVT PROPERTIES; FLOW NUMBER; PREDICTION; STATE; HYDROCARBON; EQUATION	Adequate Knowledge of reservoir fluid characteristics (e.g., bubble point pressure) plays a crucial role while conducting modeling/simulation of production processes in petroleum reservoirs. Although many efforts have been made to obtain proper correlations for prediction of bubble point pressure (BPP) of reservoir fluids, there is still relatively high magnitude of error with the developed predi…	[Ahmadi, Mohammad Ali] Petr Univ Technol, Dept Petr Engn, Ahvaz, Khuzestan, Iran; [Zendehboudi, Sohrab; James, Lesley A.] Mem Univ Newfoundland, Fac Engn & Appl Sci, St John, NF A1B 3X5, Canada; [Elkamel, Ali; Chatzis, Ioannis] Univ Waterloo, Dept Chem Engn, Waterloo, ON N2L 3G1, Canada; [Dusseault, Maurice] Univ Waterloo, Dept Earth & Environm Sci, Waterloo, ON N2L 3G1, Canada; [Lohi, Ali] Ryers…	Memorial University Newfoundland; University of Waterloo; University of Waterloo; Toronto Metropolitan University	Ahmadi, MA (corresponding author), Petr Univ Technol, Dept Petr Engn, Ahvaz, Khuzestan, Iran.	ahmadi6776@yahoo.com	Ahmadi, Mohammadali/P-9592-2017; CHATZIS, Ioannis/N-9461-2019; Zendehboudi, Sohrab/AAU-4366-2020; elkamel, ali/ABC-2963-2020; Zendehboudi, Sohrab/ABG-7741-2021; /U-5447-2017	Ahmadi, Mohammadali/0000-0002-8229-334X; Zendehboudi, Sohrab/0000-0001-8527-9087; /0000-0002-6220-6288	National Iranian Oil Company and Petroleum University of Technology (PUT)	National Iranian Oil Company and Petroleum University of Technology (PUT)	The authors would like to acknowledge the National Iranian Oil Company and Petroleum University of Technology (PUT) for support throughout this study.		72	16	16	1	9	ELSEVIER	AMSTERDAM	RADARWEG 29, 1043 NX AMSTERDAM, NETHERLANDS	0920-4105	1873-4715		J PETROL SCI ENG	J. Pet. Sci. Eng.	NOV	2014	123
J	Quraishi, M; Bhatia, SK; Pandit, S; Gupta, PK; Rangarajan, V; Lahiri, D; Varjani, S; Mehariya, S; Yang, YH				Quraishi, Marzuqa; Bhatia, Shashi Kant; Pandit, Soumya; Gupta, Piyush Kumar; Rangarajan, Vivek; Lahiri, Dibyajit; Varjani, Sunita; Mehariya, Sanjeet; Yang, Yung-Hun			Exploiting Microbes in the Petroleum Field: Analyzing the Credibility of Microbial Enhanced Oil Recovery (MEOR)	ENERGIES			English	Review						microbial enhanced oil recovery (MEOR); crude oil; petroleum biotechnology; microbial metabolic by-products; biosurfactants; microbial metabolic pathways; species properties; reservoir dynamics; field trials; numerical simulation and modelling	RHAMNOLIPID BIOSURFACTANT PRODUCTION; INDIGENOUS PSEUDOMONAS-AERUGINOSA; BACILLUS-SUBTILIS STRAIN; POTENTIAL APPLICATIONS; IN-SITU; OPTIMIZATION; SIMULATION; MICROORGANISMS; TEMPERATURE; PERFORMANCE	Crude oil is a major energy source that is exploited globally to achieve economic growth. To meet the growing demands for oil, in an environment of stringent environmental regulations and economic and technical pressure, industries have been required to develop novel oil salvaging techniques. The remaining similar to 70% of the world's conventional oil (one-third of the available total petroleum)…	[Quraishi, Marzuqa] Amity Univ, Amity Inst Biotechnol, Mumbai 410206, Maharashtra, India; [Bhatia, Shashi Kant; Yang, Yung-Hun] Konkuk Univ, Coll Engn, Dept Biol Engn, Seoul 05029, South Korea; [Bhatia, Shashi Kant; Yang, Yung-Hun] Konkuk Univ, Inst Ubiquitous Informat Technol & Applicat, Seoul 05029, South Korea; [Pandit, Soumya; Gupta, Piyush Kumar] Sharda Univ, Sch Basic Sci & Res, Dept Life S…	Konkuk University; Konkuk University; Sharda University; Birla Institute of Technology & Science Pilani (BITS Pilani); Umea University	Bhatia, SK (corresponding author), Konkuk Univ, Coll Engn, Dept Biol Engn, Seoul 05029, South Korea.; Bhatia, SK (corresponding author), Konkuk Univ, Inst Ubiquitous Informat Technol & Applicat, Seoul 05029, South Korea.; Pandit, S (corresponding author), Sharda Univ, Sch Basic Sci & Res, Dept Life Sci, Greater Noida 201306, India.	marzuqa20@gmail.com; shashibiotechhpu@gmail.com; sounip@gmail.com; dr.piyushkgupta@gmail.com; vivekrangarajan@gmail.com; dibyajit.lahiri@uem.edu.in; drsvs18@gmail.com; sanjeet.mehariya@umu.se; seokor@konkuk.ac.kr	GUPTA, Dr PIYUSH KUMAR/H-1588-2015; Pandit, Soumya/ABA-8795-2020; Varjani, Sunita/A-1069-2014; Bhatia, Shashi/N-4550-2018; Quraishi, Marzuqa/ABE-2940-2021	GUPTA, Dr PIYUSH KUMAR/0000-0002-3346-910X; Pandit, Soumya/0000-0001-8045-4675; Varjani, Sunita/0000-0001-6966-7768; Bhatia, Shashi/0000-0002-7688-6069; Quraishi, Marzuqa/0000-0001-7784-6889; Mehariya, Sanjeet/0000-0003-1801-4702	National Research Foundation of Korea (NRF) - Ministry of Science and ICT [2021R1F1A1050325]; R&D Program of MOTIE/KEIT [20014350, 20009508]	National Research Foundation of Korea (NRF) - Ministry of Science and ICT(National Research Foundation of Korea); R&D Program of MOTIE/KEIT	This study was supported by the National Research Foundation of Korea (NRF), funded by the Ministry of Science and ICT [grant number 2021R1F1A1050325]. This study was also performed with the support of the R&D Program of MOTIE/KEIT [grant number 20014350 and 20009508].		171	12	12	6	28	MDPI	BASEL	ST ALBAN-ANLAGE 66, CH-4052 BASEL, SWITZERLAND		1996-1073		ENERGIES	Energies	AUG	2021	14	15
J	Huang, L; Yu, L; Luo, Z; Song, S; Bo, H; Zheng, C				Huang, L.; Yu, L.; Luo, Z.; Song, S.; Bo, H.; Zheng, C.			A Microbial-enhanced Oil Recovery Trial in Huabei Oilfield in China	PETROLEUM SCIENCE AND TECHNOLOGY			English	Article						heavy oil; injection profile modification; MEOR; pilot test; waterflooding		This study discusses microbial-enhanced oil recovery (MEOR) application in Unit Jian-12 in Huabei Oilfield, China. The pilot field was a heavy oil reservoir (50 degrees C, 204 mP.s) with high temperature (75.6 degrees C). Unit Jian-12 was undergoing a waterflooding pattern; however, ordinary waterflooding no longer recovered residual oil efficiently that the MEOR method was strongly recommended i…	[Huang, L.; Yu, L.; Zheng, C.] Chinese Acad Sci, Grad Univ, Inst Porous Flow & Fluid Mech, Langfang, Peoples R China; [Luo, Z.] China Natl Petr Corp, Res Inst Petr Exploitat & Dev, Beijing, Peoples R China; [Song, S.; Bo, H.] Natl Petr Corp, Huabei Oil Field Co, Project Dept, Renqiu, Peoples R China	Chinese Academy of Sciences; University of Chinese Academy of Sciences, CAS; China National Petroleum Corporation	Huang, L (corresponding author), CNPC, Inst Porous Flow & Fluid Mech, Mail Box 44, Langfang 065007, Hebei Province, Peoples R China.	Huanglixin69@petrochina.com.cn							8	6	7	1	26	TAYLOR & FRANCIS INC	PHILADELPHIA	520 CHESTNUT STREET, STE 850, PHILADELPHIA, PA 19106 USA	1091-6466	1532-2459		PETROL SCI TECHNOL	Pet. Sci. Technol.		2014	32	5
J	Bhattacharya, M; Guchhait, S; Biswas, D; Singh, R				Bhattacharya, Munna; Guchhait, Sugata; Biswas, Dipa; Singh, Rituraj			Evaluation of a microbial consortium for crude oil spill bioremediation and its potential uses in enhanced oil recovery	BIOCATALYSIS AND AGRICULTURAL BIOTECHNOLOGY			English	Article						Biodegradation; Crude oil; Bioemulsifier; Exopolysaccharide; Microbial enhanced oil recovery; Sand-pack flooding	WASTE ENGINE OIL; BIOSURFACTANT PRODUCTION; HEAVY OIL; OPTIMIZATION; MICROORGANISMS; HYDROCARBONS; EFFICIENCY; STRAINS; MEDIA	Microbial enhanced oil recovery (MEOR) process utilizes reservoir microorganisms (in situ) or specially selected bacteria to use their metabolic products (ex-situ) for extra oil recovery from depleted oil reservoirs. Biodegradation of crude oil and simultaneous production of bioemulsifiers by a mixed culture consisting of Ochrobactrum pseudintermedium Cl and Bacillus cereus K1 have been investiga…	[Bhattacharya, Munna; Biswas, Dipa] Univ Calcutta, Dept Chem Technol, 92 APC Rd, Kolkata 700009, W Bengal, India; [Guchhait, Sugata] Oil & Nat Gas Corp Ltd, Well Serv, Mumbai, Maharashtra, India; [Singh, Rituraj] Indian Sch Mines, Dept Petr Engn, Dhanbad, Bihar, India	University of Calcutta; Oil & Natural Gas Corporation; Indian Institute of Technology System (IIT System); Indian Institute of Technology (Indian School of Mines) Dhanbad	Bhattacharya, M (corresponding author), Univ Calcutta, Dept Chem Technol, 92 APC Rd, Kolkata 700009, W Bengal, India.	munna@ciab.res.in							50	10	11	0	11	ELSEVIER	AMSTERDAM	RADARWEG 29, 1043 NX AMSTERDAM, NETHERLANDS		1878-8181		BIOCATAL AGR BIOTECH	Biocatal. Agric. Biotechnol.	MAR	2019	18
J	Van Hamme, JD; Singh, A; Ward, OP				Van Hamme, JD; Singh, A; Ward, OP			Recent advances in petroleum microbiology	MICROBIOLOGY AND MOLECULAR BIOLOGY REVIEWS			English	Review							POLYCYCLIC AROMATIC-HYDROCARBONS; SULFATE-REDUCING BACTERIA; PSEUDOMONAS-PUTIDA S12; ANAEROBIC TOLUENE METABOLISM; OIL-SPILL BIOREMEDIATION; IN-SITU BIOREMEDIATION; ENCODING NAPHTHALENE DIOXYGENASE; METHYL-SUBSTITUTED NAPHTHALENES; PHENANTHRENE-DEGRADING BACTERIA; GREEN FLUORESCENT PROTEIN	Recent advances in molecular biology have extended our understanding of the metabolic processes related to microbial transformation of petroleum hydrocarbons. The physiological responses of microorganisms to the presence of hydrocarbons, including cell surface alterations and adaptive mechanisms for uptake and efflux of these substrates, have been characterized. New molecular techniques have enha…	Univ Waterloo, Dept Biol, Waterloo, ON N2L 3G1, Canada; Univ Coll Caribo, Dept Biol Sci, Kamloops, BC V2C 5N3, Canada; Petrozyme Technol Inc, Guelph, ON N1H 6H9, Canada	University of Waterloo	Ward, OP (corresponding author), Univ Waterloo, Dept Biol, Waterloo, ON N2L 3G1, Canada.	opward@sciborg.uwaterloo.ca	Van Hamme, Jonathan D/B-9876-2013	Van Hamme, Jonathan/0000-0001-9471-7616					692	836	908	20	596	AMER SOC MICROBIOLOGY	WASHINGTON	1752 N ST NW, WASHINGTON, DC 20036-2904 USA	1092-2172	1098-5557		MICROBIOL MOL BIOL R	Microbiol. Mol. Biol. Rev.	DEC	2003	67	4
J	Li, XX; Yang, T; Mbadinga, SM; Liu, JF; Yang, SZ; Gu, JD; Mu, BZ				Li, Xiao-Xiao; Yang, Tao; Mbadinga, Serge M.; Liu, Jin-Feng; Yang, Shi-Zhong; Gu, Ji-Dong; Mu, Bo-Zhong			Responses of Microbial Community Composition to Temperature Gradient and Carbon Steel Corrosion in Production Water of Petroleum Reservoir	FRONTIERS IN MICROBIOLOGY			English	Article						microbial induced corrosion; temperature gradient; biocorrosion; mesophilic; thermophilic and hyperthermophilic microorganisms; oil reservoir	SULFATE-REDUCING BACTERIA; 16S RIBOSOMAL-RNA; METHANOGENIC COMMUNITY; NORTH-SEA; SP NOV.; IRON; DIVERSITY; ARCHAEA; BIOCORROSION; BEHAVIOR	Oil reservoir production systems are usually associated with a temperature gradient and oil production facilities frequently suffer from pipeline corrosion failures. Both bacteria and archaea potentially contribute to biocorrosion of the oil production equipment. Here the response of microbial populations from the petroleum reservoir to temperature gradient and corrosion of carbon steel coupons w…	[Li, Xiao-Xiao; Yang, Tao; Mbadinga, Serge M.; Liu, Jin-Feng; Yang, Shi-Zhong; Mu, Bo-Zhong] East China Univ Sci & Technol, State Key Lab Bioreactor Engn, Shanghai, Peoples R China; [Li, Xiao-Xiao; Yang, Tao; Mbadinga, Serge M.; Liu, Jin-Feng; Yang, Shi-Zhong; Mu, Bo-Zhong] East China Univ Sci & Technol, Inst Appl Chem, Shanghai, Peoples R China; [Mbadinga, Serge M.; Mu, Bo-Zhong] Shanghai Collab…	East China University of Science & Technology; East China University of Science & Technology; University of Hong Kong	Mu, BZ (corresponding author), East China Univ Sci & Technol, State Key Lab Bioreactor Engn, Shanghai, Peoples R China.; Mu, BZ (corresponding author), East China Univ Sci & Technol, Inst Appl Chem, Shanghai, Peoples R China.; Mu, BZ (corresponding author), Shanghai Collaborat Innovat Ctr Biomfg Technol, Shanghai, Peoples R China.	bzmu@ecust.edu.cn	Gu, Ji-Dong/AAF-2291-2019; Mbadinga, Serge Maurice/I-3789-2017; Gu, Ji-Dong/AAO-7851-2020; Mu, Bo-Zhong/F-4704-2017	Mu, Bo-Zhong/0000-0002-9564-4970	National Science Foundation of China [41530318, 41673084]; Research Foundation of Shanghai [15JC1401400]; Fundamental Research Funds for the Central Universities of China [222201 717017]	National Science Foundation of China(National Natural Science Foundation of China (NSFC)); Research Foundation of Shanghai; Fundamental Research Funds for the Central Universities of China(Fundamental Research Funds for the Central Universities)	This work was supported by the National Science Foundation of China (No. 41530318, 41673084), the Research Foundation of Shanghai (No. 15JC1401400), and the Fundamental Research Funds for the Central Universities of China (No. 222201 717017).		74	27	27	2	31	FRONTIERS MEDIA SA	LAUSANNE	AVENUE DU TRIBUNAL FEDERAL 34, LAUSANNE, CH-1015, SWITZERLAND		1664-302X		FRONT MICROBIOL	Front. Microbiol.	DEC 5	2017	8
J	Liu, JF; Lu, YW; Liu, XB; Li, BG; Sun, YF; Zhou, L; Liu, YF; Yang, SZ; Gu, JD; Mu, BZ				Liu, Jin-Feng; Lu, Yu-Wei; Liu, Xiao-Bo; Li, Bai-Guang; Sun, Yu-Fei; Zhou, Lei; Liu, Yi-Fan; Yang, Shi-Zhong; Gu, Ji-Dong; Mu, Bo-Zhong			Dominance of Pseudomonas in bacterial community and inhibition of fumarate addition pathway by injection of nutrients in oil reservoir revealed by functional gene and their transcript analyses	INTERNATIONAL BIODETERIORATION & BIODEGRADATION			English	Article						Oil reservoir; Microbial composition; Functional gene; Transcripts; Nutrient injection; Evolution	PETROLEUM RESERVOIR; DEGRADATION; FIELD; BIODEGRADATION; MICROORGANISMS; ACTIVATION; AERUGINOSA; DIVERSITY; PROCEEDS; ALKANES	The microbial community composition in subsurface oil reservoirs is responsible for the biogeochemical reactions of hydrocarbon transformation. In this study, the composition, major functions and gene expression activity of the microorganisms in production water from an oil reservoir were analyzed prior to and after injection nutrients using high-throughput 16S rRNA gene sequencing, functional ge…	[Liu, Jin-Feng; Lu, Yu-Wei; Zhou, Lei; Liu, Yi-Fan; Yang, Shi-Zhong; Mu, Bo-Zhong] East China Univ Sci & Technol, State Key Lab Bioreactor Engn, Shanghai 200237, Peoples R China; [Liu, Jin-Feng; Lu, Yu-Wei; Zhou, Lei; Liu, Yi-Fan; Yang, Shi-Zhong; Mu, Bo-Zhong] East China Univ Sci & Technol, Sch Chem & Mol Engn, Shanghai 200237, Peoples R China; [Liu, Xiao-Bo; Li, Bai-Guang] PetroChina, Daqing Oi…	East China University of Science & Technology; East China University of Science & Technology; China National Petroleum Corporation; Daqing Oilfield Company Limited; China National Petroleum Corporation; Daqing Oilfield Company Limited; University of Hong Kong; East China University of Science & Technology	Mu, BZ (corresponding author), East China Univ Sci & Technol, State Key Lab Bioreactor Engn, Shanghai 200237, Peoples R China.; Mu, BZ (corresponding author), East China Univ Sci & Technol, Sch Chem & Mol Engn, Shanghai 200237, Peoples R China.	bzmu@ecust.edu.cn	Mu, Bo-Zhong/F-4704-2017	Mu, Bo-Zhong/0000-0002-9564-4970	National Science Foundation of China [41673084, 41530318]; Shanghai International Collaboration Program [18230743300]	National Science Foundation of China(National Natural Science Foundation of China (NSFC)); Shanghai International Collaboration Program	We are grateful to the management of Daqing Oil Field for sampling support. This work was supported by the National Science Foundation of China (41673084, 41530318), the Shanghai International Collaboration Program (18230743300).		49	5	5	4	16	ELSEVIER SCI LTD	OXFORD	THE BOULEVARD, LANGFORD LANE, KIDLINGTON, OXFORD OX5 1GB, OXON, ENGLAND	0964-8305	1879-0208		INT BIODETER BIODEGR	Int. Biodeterior. Biodegrad.	SEP	2020	153
J	Huang, X; Wang, J; Ma, CY; Ma, LY; Qiao, C				Huang, Xue; Wang, Jin; Ma, Chunyan; Ma, Liya; Qiao, Chen			Diversity analysis of microbial communities and biodegradation performance of two halotolerant and thermotolerant Bacillus licheniformis strains in oilfield-produced wastewater	INTERNATIONAL BIODETERIORATION & BIODEGRADATION			English	Article						Oilfield-produced wastewater (OPW); Microbiota structure; Halotolerant and thermotolerant microbes; Bacillus licheniformis; Petroleum hydrocarbon	SULFATE-REDUCING BACTERIUM; CRUDE PETROLEUM-OIL; SP NOV.; DEHYDROGENASE-ACTIVITY; AROMATIC-HYDROCARBONS; CELL-SURFACE; GEN. NOV.; START-UP; DEGRADATION; REACTOR	Two oilfield-produced wastewater (OPW) plants, one grown through two-stage aerobic (O-1/O-2) activated sludge process in North-China Oilfield (NCO) and the other through anaerobic/aerobic/aerobic (An/O-1/O-2) biofilm process in Liao-He Oilfield (LHO), were used for the analysis of the distribution of bacterial communities systematically by high-throughput sequencing. A large number of halotoleran…	[Huang, Xue; Wang, Jin; Ma, Chunyan; Ma, Liya; Qiao, Chen] Beijing Jiaotong Univ, Dept Municipal & Environm Engn, Beijing 100044, Peoples R China; [Huang, Xue; Wang, Jin; Ma, Chunyan; Ma, Liya; Qiao, Chen] Beijing Key Lab Aqueous Typical Pollutants Contro, Beijing 100044, Peoples R China	Beijing Jiaotong University	Wang, J (corresponding author), Beijing Jiaotong Univ, Dept Municipal & Environm Engn, Beijing 100044, Peoples R China.	jwang1@bjtu.edu.cn			Fundamental Research Funds for the Central Universities of China [2014JBM073]; Beijing Key Laboratory of Aqueous Typical Pollutants Control and Water Quality Safeguard	Fundamental Research Funds for the Central Universities of China(Fundamental Research Funds for the Central Universities); Beijing Key Laboratory of Aqueous Typical Pollutants Control and Water Quality Safeguard	This work was supported by the Fundamental Research Funds for the Central Universities of China (2014JBM073) and Beijing Key Laboratory of Aqueous Typical Pollutants Control and Water Quality Safeguard.		55	3	3	1	43	ELSEVIER SCI LTD	OXFORD	THE BOULEVARD, LANGFORD LANE, KIDLINGTON, OXFORD OX5 1GB, OXON, ENGLAND	0964-8305	1879-0208		INT BIODETER BIODEGR	Int. Biodeterior. Biodegrad.	FEB	2019	137
J	Li, H; Yang, SZ; Mu, BZ; Rong, ZF; Zhang, J				Li, H; Yang, SZ; Mu, BZ; Rong, ZF; Zhang, J			Molecular analysis of the bacterial community in a continental high-temperature and water-flooded petroleum reservoir	FEMS MICROBIOLOGY LETTERS			English	Article						petroleum reservoir; 16S rRNA gene diversity; restriction fragment length polymorphism; bacterial community; clone library	RIBOSOMAL-RNA GENES; SP-NOV; NORTH-SEA; MICROBIAL COMMUNITIES; REDUCING BACTERIUM; OIL; DIVERSITY; ARCHAEA; IDENTIFICATION; ASSEMBLAGES	Water from a continental high-temperature, long-term water-flooded petroleum reservoir in Huabei Oilfield in China was analysed for its bacterial community and diversity. The bacteria were characterized by their 16S rRNA genes. A 16S rRNA gene clone library was constructed from the community DNA, and using restriction fragment length polymorphism analysis, 337 randomly selected clones were cluste…	E China Univ Sci & Technol, Inst Appl Chem, Shanghai 200237, Peoples R China; E China Univ Sci & Technol, Inst Bioengn, Shanghai 200237, Peoples R China	East China University of Science & Technology; East China University of Science & Technology	Mu, BZ (corresponding author), E China Univ Sci & Technol, Inst Appl Chem, Shanghai 200237, Peoples R China.	bzmu@ecust.edu.cn	Mu, Bo-Zhong/F-4704-2017; Hui, Li/B-4166-2009	Mu, Bo-Zhong/0000-0002-9564-4970; Hui, Li/0000-0002-7574-048X					41	61	82	1	25	OXFORD UNIV PRESS	OXFORD	GREAT CLARENDON ST, OXFORD OX2 6DP, ENGLAND	0378-1097	1574-6968		FEMS MICROBIOL LETT	FEMS Microbiol. Lett.	APR	2006	257	1
S	Youssef, N; Elshahed, MS; McInerney, MJ		Laskin, AL; Sariaslani, S; Gadd, G		Youssef, Noha; Elshahed, Mostafa S.; McInerney, Michael J.			Microbial Processes in Oil Fields: Culprits, Problems, and Opportunities	ADVANCES IN APPLIED MICROBIOLOGY, VOL 66	Advances in Applied Microbiology		English	Review; Book Chapter						Petroleum microbiology; Biosurfactants; Sulfate reducers; Souring; Plugging; Oil recovery	SULFATE-REDUCING BACTERIUM; 16S RIBOSOMAL-RNA; CONTINENTAL HIGH-TEMPERATURE; LEUCONOSTOC-MESENTEROIDES GROWTH; KONGDIAN PETROLEUM RESERVOIR; HYDROGEN-SULFIDE PRODUCTION; BIOMASS PLUG DEVELOPMENT; IN-SITU GROWTH; SP-NOV.; GEN.-NOV.	our understanding of the phylogenetic diversity, metabolic capabilities, ecological roles, and community dynamics of oil reservoir microbial communities is far from complete. The lack of appreciation of the microbiology of oil reservoirs can lead to detrimental consequences such as souring or plugging. In contrast, knowledge of the microbiology of oil reservoirs can be used to enhance productivit…	[Youssef, Noha; Elshahed, Mostafa S.; McInerney, Michael J.] Oklahoma State Univ, Dept Microbiol & Mol Genet, Stillwater, OK 74074 USA	Oklahoma State University System; Oklahoma State University - Stillwater	Youssef, N (corresponding author), Univ Oklahoma, Dept Bot & Microbiol, 770 Vleet Oval, Norman, OK 73019 USA.		McInerney, Michael J/E-6215-2012	Youssef, Noha/0000-0001-9159-3785					471	257	273	4	106	ELSEVIER ACADEMIC PRESS INC	SAN DIEGO	525 B STREET, SUITE 1900, SAN DIEGO, CA 92101-4495 USA	0065-2164		978-0-12-374788-4	ADV APPL MICROBIOL	Adv. Appl. Microbiol.		2009	66
J	Liu, QL; Tang, J; Liu, XM; Song, BR; Zhen, MN; Ashbolt, NJ				Liu, Qinglong; Tang, Jingchun; Liu, Xiaomei; Song, Benru; Zhen, Meinan; Ashbolt, Nicholas J.			Vertical response of microbial community and degrading genes to petroleum hydrocarbon contamination in saline alkaline soil	JOURNAL OF ENVIRONMENTAL SCIENCES			English	Article						Column microcosm; Molecular analyses; Petroleum hydrocarbons; Microbial community; Catabolic genes; Saline alkaline soil	POLYCYCLIC AROMATIC-HYDROCARBONS; CRUDE-OIL; NATURAL ATTENUATION; ALKANE HYDROXYLASES; WASTE-WATER; BIOREMEDIATION; DEGRADATION; DIVERSITY; BACTERIA; REMOVAL	A column microcosm was conducted by amending crude oil into Dagang Oilfield soil to simulate the bioremediation process. The dynamic change of microbial communities and metabolic genes in vertical depth soil from 0 to 80 cm were characterized to evaluate the petroleum degradation potential of indigenous microorganism. The influence of environmental variables on the microbial responds to petroleum…	[Liu, Qinglong; Tang, Jingchun; Liu, Xiaomei; Song, Benru; Zhen, Meinan] Nankai Univ, Coll Environm Sci & Engn, Tianjin 300071, Peoples R China; [Tang, Jingchun] Minist Educ, Key Lab Pollut Proc & Environm Criteria, Tianjin 300071, Peoples R China; [Tang, Jingchun] Tianjin Engn Res Ctr Environm Diag & Contaminat R, Tianjin 300071, Peoples R China; [Ashbolt, Nicholas J.] Univ Alberta, Sch Publ Hlt…	Nankai University; University of Alberta	Tang, J (corresponding author), Nankai Univ, Coll Environm Sci & Engn, Tianjin 300071, Peoples R China.; Tang, J (corresponding author), Minist Educ, Key Lab Pollut Proc & Environm Criteria, Tianjin 300071, Peoples R China.; Tang, J (corresponding author), Tianjin Engn Res Ctr Environm Diag & Contaminat R, Tianjin 300071, Peoples R China.	liuyun200799@163.com; tangjch@nankai.edu.cn	Ashbolt, Nicholas John/H-4004-2014; liu, xiao/HKE-9880-2023; liu, qingqing/HHD-0360-2022; Liu, Qing/GWC-9222-2022	Ashbolt, Nicholas John/0000-0002-3853-0096;	National Natural Science Foundation of China, China [41473070, U1806216]; Natural Science Foundation of Tianjin, China [17JCQNJC07800]; Tianjin ST Program [17ZXSTSF00050, 16YFXTSF00520, 17PTGCCX00240]; 111 Program, Ministry of Education, China [T2017002]	National Natural Science Foundation of China, China(National Natural Science Foundation of China (NSFC)); Natural Science Foundation of Tianjin, China(Natural Science Foundation of Tianjin); Tianjin ST Program; 111 Program, Ministry of Education, China	This work was supported by the National Natural Science Foundation of China, China (Nos. 41473070, U1806216), the Natural Science Foundation of Tianjin, China (No. 17JCQNJC07800), Tianjin S&T Program (Nos. 17ZXSTSF00050, 16YFXTSF00520, 17PTGCCX00240), 111 Program, Ministry of Education, China (No. T2017002).		58	29	36	6	161	SCIENCE PRESS	BEIJING	16 DONGHUANGCHENGGEN NORTH ST, BEIJING 100717, PEOPLES R CHINA	1001-0742	1878-7320		J ENVIRON SCI	J. Environ. Sci.	JUL	2019	81
J	Morais, D; Pylro, V; Clark, IM; Hirsch, PR; Totola, MR				Morais, Daniel; Pylro, Victor; Clark, Ian M.; Hirsch, Penny R.; Totola, Marcos R.			Responses of microbial community from tropical pristine coastal soil to crude oil contamination	PEERJ			English	Article						Next generation sequencing; Metagenome; Taxonomy comparison; Alpha-diversity; Beta-diversity; Crude oil	POLYCYCLIC AROMATIC-HYDROCARBONS; DIFFERENTIAL EXPRESSION ANALYSIS; PETROLEUM; DIVERSITY; BACTERIAL; BIODEGRADATION; DEGRADATION; BIOREMEDIATION; TOXICITY; DATABASE	Brazilian offshore crude oil exploration has increased after the discovery of new reservoirs in the region known as pre-sal, in a depth of 7.000 m under the water surface. Oceanic islands near these areas represent sensitive environments, where changes in microbial communities due oil contamination could stand for the loss of metabolic functions, with catastrophic effects to the soil services pro…	[Morais, Daniel; Totola, Marcos R.] Univ Fed Vicosa, Dept Microbiol, Vicosa, MG, Brazil; [Morais, Daniel; Clark, Ian M.] Rothamsted Res, AgroEcol Dept, Harpenden, Herts, England; [Pylro, Victor; Hirsch, Penny R.] Fiocruz MS, Rene Rachou Res Ctr CPqRR, Genom & Computat Biol Grp, Belo Horizonte, MG, Brazil	Universidade Federal de Vicosa; UK Research & Innovation (UKRI); Biotechnology and Biological Sciences Research Council (BBSRC); Rothamsted Research; Fundacao Oswaldo Cruz	Morais, D (corresponding author), Univ Fed Vicosa, Dept Microbiol, Vicosa, MG, Brazil.; Morais, D (corresponding author), Rothamsted Res, AgroEcol Dept, Harpenden, Herts, England.	kdaniel-morais@hotmail.com	Clark, Ian Michael/I-1249-2016; Hirsch, Penny R/B-5135-2008; Pylro, Victor Satler/G-6045-2010; Morais, Daniel Kumazawa/I-3551-2019	Clark, Ian Michael/0000-0002-1589-5420; Hirsch, Penny R/0000-0002-5909-1934; Pylro, Victor Satler/0000-0003-2154-9150; Morais, Daniel Kumazawa/0000-0003-3328-7848	Conselho Nacional de Desenvolvimento Cientifico e Tecnologico (CNPq) [405544/2012-0]; Coordenacao de Aperfeicoamento de Pessoal de Nivel Superior (CAPES/PROEX); Biological Sciences Research Council (BBSRC) of the UK; Biotechnology and Biological Sciences Research Council [BB/K005332/1, BBS/E/C/00005196] Funding Source: researchfish; BBSRC [BB/K005332/1, BBS/E/C/00005196] Funding Source: UKRI	Conselho Nacional de Desenvolvimento Cientifico e Tecnologico (CNPq)(Conselho Nacional de Desenvolvimento Cientifico e Tecnologico (CNPQ)); Coordenacao de Aperfeicoamento de Pessoal de Nivel Superior (CAPES/PROEX)(Coordenacao de Aperfeicoamento de Pessoal de Nivel Superior (CAPES)); Biological Sciences Research Council (BBSRC) of the UK(UK Research & Innovation (UKRI)Biotechnology and Biological …	Conselho Nacional de Desenvolvimento Cientifico e Tecnologico (CNPq) grant 405544/2012-0 and Coordenacao de Aperfeicoamento de Pessoal de Nivel Superior (CAPES/PROEX) financed this work. Rothamsted Research receives strategic funding from the Biological Sciences Research Council (BBSRC) of the UK. The funders had no role in study design, data collection and analysis, decision to publish, or prepa…		65	20	20	1	68	PEERJ INC	LONDON	341-345 OLD ST, THIRD FLR, LONDON, EC1V 9LL, ENGLAND	2167-8359			PEERJ	PeerJ	FEB 18	2016	4
J	Tian, Y; Wan, YY; Mu, HM; Dong, HL; Briggs, BR; Zhang, ZH				Tian, Yan; Wan, Yun-Yang; Mu, Hong-Mei; Dong, Hai-Liang; Briggs, Brandon R.; Zhang, Zhi-Huan			Microbial Diversity in High-Temperature Heavy Oil Reservoirs	GEOMICROBIOLOGY JOURNAL			English	Article						Heavy oil reservoir; high temperature; SAGD; microbial diversity; indigenous microorganism	16S RIBOSOMAL-RNA; PHYLOGENETIC DIVERSITY; BACTERIAL COMMUNITY; PETROLEUM OIL; WATER; SEQUENCES	The microbial community in oil reservoirs plays important roles in carbon, sulfur, and nitrogen cycling. We identified the microbial composition, abundance, and diversity in two heavy oil wells (W1 and W2) located at Liaohe oilfield, China, that were flooded with higher temperatures, forming a decreasing gradient-temperature field (DGTF) from the steam chamber to the original surrounding formatio…	[Tian, Yan; Wan, Yun-Yang; Mu, Hong-Mei; Zhang, Zhi-Huan] China Univ Petr, Coll Geosci, Beijing Key Lab Petr Pollut & Control, State Key Lab Petr Resources & Prospecting, Beijing 102249, Peoples R China; [Dong, Hai-Liang] China Univ Geosci, Inst Earth Sci, State Key Lab Biogeol & Environm Geol, Beijing, Peoples R China; [Dong, Hai-Liang] Miami Univ, Dept Geol & Environm Earth Sci, Oxford, OH 4505…	China University of Petroleum; University System of Ohio; Miami University; University of Alaska System; University of Alaska Anchorage	Wan, YY; Zhang, ZH (corresponding author), China Univ Petr, Coll Geosci, Beijing Key Lab Petr Pollut & Control, State Key Lab Petr Resources & Prospecting, Beijing 102249, Peoples R China.	wanyunyang@cup.edu.cn; zhangzh3996@vip.163.com		Briggs, Brandon/0000-0002-3808-8269; Wan, Yun Yang/0000-0001-5627-5677	National Natural Science Foundation of China [41373086, 41373126]; National Science and Technology Major Project [2016ZX05050011, 2016ZX05040002]; New Century Excellent Talent Supporting Project by MOE [NCET-09-0765]; Excellent Talent Fund of China University of Petroleum-Beijing [KYJJ2012-01-10]	National Natural Science Foundation of China(National Natural Science Foundation of China (NSFC)); National Science and Technology Major Project; New Century Excellent Talent Supporting Project by MOE; Excellent Talent Fund of China University of Petroleum-Beijing	This work was financially supported by the National Natural Science Foundation of China [41373086 and 41373126], National Science and Technology Major Project [Nos. 2016ZX05050011 and, 2016ZX05040002], New Century Excellent Talent Supporting Project by MOE [NCET-09-0765], and Excellent Talent Fund of China University of Petroleum-Beijing [KYJJ2012-01-10].		48	4	5	2	23	TAYLOR & FRANCIS INC	PHILADELPHIA	530 WALNUT STREET, STE 850, PHILADELPHIA, PA 19106 USA	0149-0451	1521-0529		GEOMICROBIOL J	Geomicrobiol. J.	JAN 2	2020	37	1
J	Guan, J; Zhang, BL; Mbadinga, SM; Liu, JF; Gu, JD; Mu, BZ				Guan, Jing; Zhang, Bing-Liang; Mbadinga, Serge Maurice; Liu, Jin-Feng; Gu, Ji-Dong; Mu, Bo-Zhong			Functional genes (dsr) approach reveals similar sulphidogenic prokaryotes diversity but different structure in saline waters from corroding high temperature petroleum reservoirs	APPLIED MICROBIOLOGY AND BIOTECHNOLOGY			English	Article						Corrosion; dsr genes; High sulfate content; High temperature oil reservoir; Saline production water; Sulphidogenic prokaryotes	SULFATE-REDUCING BACTERIA; MULTIPLE LATERAL TRANSFERS; 16S RIBOSOMAL-RNA; MICROBIAL COMMUNITY; REDUCTASE GENES; H2S PRODUCTION; CORROSION; NITRATE; LINEAGES; NITRITE	Oil reservoirs and production facilities are generally contaminated with H2S resulting from the activity of sulphidogenic prokaryotes (SRP). Sulphidogenesis plays a major role in reservoir souring and microbial influenced corrosion in oil production systems. In the present study, sulphidogenic microbial diversity and composition in saline production fluids retrieved from three blocks of corroding…	[Guan, Jing; Zhang, Bing-Liang; Mbadinga, Serge Maurice; Liu, Jin-Feng; Mu, Bo-Zhong] E China Univ Sci & Technol, State Key Lab Bioreactor Engn, Shanghai 200237, Peoples R China; [Guan, Jing; Zhang, Bing-Liang; Mbadinga, Serge Maurice; Liu, Jin-Feng; Mu, Bo-Zhong] E China Univ Sci & Technol, Inst Appl Chem, Shanghai 200237, Peoples R China; [Gu, Ji-Dong] Univ Hong Kong, Sch Biol Sci, Hong Kong, H…	East China University of Science & Technology; East China University of Science & Technology; University of Hong Kong	Mu, BZ (corresponding author), E China Univ Sci & Technol, State Key Lab Bioreactor Engn, Shanghai 200237, Peoples R China.	bzmu@ecust.edu.cn	Mbadinga, Serge Maurice/I-3789-2017; Gu, Ji-Dong/AAO-7851-2020; Gu, Ji-Dong/AAF-2291-2019; Mu, Bo-Zhong/F-4704-2017	Mu, Bo-Zhong/0000-0002-9564-4970; Mbadinga, Serge Maurice/0000-0001-9802-4251	National Natural Science Foundation of China [41073055]; NSFC/RGC Joint Research Fund [41161160560]	National Natural Science Foundation of China(National Natural Science Foundation of China (NSFC)); NSFC/RGC Joint Research Fund	This work was supported by the National Natural Science Foundation of China (Grant No. 41073055) and the NSFC/RGC Joint Research Fund (No. 41161160560).		35	36	38	2	65	SPRINGER	NEW YORK	ONE NEW YORK PLAZA, SUITE 4600, NEW YORK, NY, UNITED STATES	0175-7598	1432-0614		APPL MICROBIOL BIOT	Appl. Microbiol. Biotechnol.	FEB	2014	98	4
J	Yamane, K; Maki, H; Nakayama, T; Nakajima, T; Nomura, N; Uchiyama, H; Kitaoka, M				Yamane, Kunio; Maki, Hideaki; Nakayama, Tsuyoshi; Nakajima, Toshiaki; Nomura, Nobuhiko; Uchiyama, Hiroo; Kitaoka, Motomitsu			Diversity and Similarity of Microbial Communities in Petroleum Crude Oils Produced in Asia	BIOSCIENCE BIOTECHNOLOGY AND BIOCHEMISTRY			English	Article						petroleum crude oil; alkane composition; microbial community; 16S rRNA gene diversity; precipitation with isooctane	16S RIBOSOMAL-RNA; HIGH-TEMPERATURE; SUBSURFACE SEDIMENTS; BACTERIAL DIVERSITY; SP NOV.; IDENTIFICATION; RESERVOIR; DATABASE; GENES; FIELD	To understand microbial communities in petroleum crude oils, we precipitated DNA using high concentrations of 2,2,4-trimethylpentane (isooctane) and purified. Samples of DNA from five crude oils, (Middle East, 3; China, 1; and Japan, 1) were characterized based upon their 16S rRNA gene sequences after PCR amplification and the construction of clone libraries. We detected 48 eubacterial species, o…	[Yamane, Kunio; Kitaoka, Motomitsu] Natl Food Res Inst, Tsukuba, Ibaraki 3058642, Japan; [Maki, Hideaki] Natl Inst Environm Studies, Tsukuba, Ibaraki 3058506, Japan; [Nakayama, Tsuyoshi; Nakajima, Toshiaki; Nomura, Nobuhiko; Uchiyama, Hiroo] Univ Tsukuba, Grad Sch Life & Environm Sci, Tsukuba, Ibaraki 3058572, Japan	National Agriculture & Food Research Organization - Japan; National Food Research Institute - Japan; National Institute for Environmental Studies - Japan; University of Tsukuba	Yamane, K (corresponding author), Natl Food Res Inst, 2-1-12 Kannondai, Tsukuba, Ibaraki 3058642, Japan.	yamanek@affrc.go.jp	Kitaoka, Motomitsu/R-1536-2019; Nomura, Nobuhiko/AAR-1915-2021	Kitaoka, Motomitsu/0000-0002-0083-1838; Nomura, Nobuhiko/0000-0003-1103-9157					30	41	42	0	15	TAYLOR & FRANCIS LTD	ABINGDON	4 PARK SQUARE, MILTON PARK, ABINGDON OX14 4RN, OXON, ENGLAND	0916-8451	1347-6947		BIOSCI BIOTECH BIOCH	Biosci. Biotechnol. Biochem.	NOV	2008	72	11
J	Li, XX; Mbadinga, SM; Liu, JF; Zhou, L; Yang, SZ; Gu, JD; Mu, BZ				Li, Xiao-Xiao; Mbadinga, Serge Maurice; Liu, Jin-Feng; Zhou, Lei; Yang, Shi-Zhong; Gu, Ji-Dong; Mu, Bo-Zhong			Microbiota and their affiliation with physiochemical characteristics of different subsurface petroleum reservoirs	INTERNATIONAL BIODETERIORATION & BIODEGRADATION			English	Review						Oil reservoirs; Archaea; Bacteria; Water-flooding; Microbial enhanced energy recovery (MEER); Reservoir souring; Subsurface microbiology	SULFATE-REDUCING BACTERIA; 16S RIBOSOMAL-RNA; CONTINENTAL HIGH-TEMPERATURE; OIL-FIELD; SP-NOV.; NORTH-SEA; PHYLOGENETIC DIVERSITY; GEN. NOV.; COMMUNITY STRUCTURE; PRODUCTION-WATER	Microbial communities and their functions in subsurface petroleum reservoirs are crucially important for better understanding of biogeochemical processes and life forms in extreme environment, and developing new strategies and technologies for microbial enhanced energy recovery (MEER) and control of reservoir souring and corrosion in oil production systems as well as bioremediation of contaminate…	[Li, Xiao-Xiao; Mbadinga, Serge Maurice; Liu, Jin-Feng; Zhou, Lei; Yang, Shi-Zhong; Mu, Bo-Zhong] East China Univ Sci & Technol, State Key Lab Bioreactor Engn, Shanghai 200237, Peoples R China; [Li, Xiao-Xiao; Mbadinga, Serge Maurice; Liu, Jin-Feng; Zhou, Lei; Yang, Shi-Zhong; Mu, Bo-Zhong] East China Univ Sci & Technol, Inst Appl Chem, Shanghai 200237, Peoples R China; [Gu, Ji-Dong] Univ Hong Ko…	East China University of Science & Technology; East China University of Science & Technology; University of Hong Kong	Mu, BZ (corresponding author), East China Univ Sci & Technol, Shanghai 200237, Peoples R China.	bzmu@ecust.edu.cn	Mbadinga, Serge Maurice/I-3789-2017; Gu, Ji-Dong/AAF-2291-2019; Gu, Ji-Dong/AAO-7851-2020; Mu, Bo-Zhong/F-4704-2017	Mu, Bo-Zhong/0000-0002-9564-4970	National Natural Science Foundation of China [41530318, 41273084, 41403066]; Research Foundation of Shanghai [15JC1401400]	National Natural Science Foundation of China(National Natural Science Foundation of China (NSFC)); Research Foundation of Shanghai	This work was supported by National Natural Science Foundation of China (Grant No. 41530318, 41273084 and 41403066) and the Research Foundation of Shanghai (No. 15JC1401400).		142	46	51	2	55	ELSEVIER SCI LTD	OXFORD	THE BOULEVARD, LANGFORD LANE, KIDLINGTON, OXFORD OX5 1GB, OXON, ENGLAND	0964-8305	1879-0208		INT BIODETER BIODEGR	Int. Biodeterior. Biodegrad.	MAY	2017	120
J	Hidalgo, KJ; Sierra-Garcia, IN; Zafra, G; de Oliveira, VM				Hidalgo, Kelly J.; Sierra-Garcia, Isabel N.; Zafra, German; de Oliveira, Valeria M.			Genome-Resolved Meta-Analysis of the Microbiome in Oil Reservoirs Worldwide	MICROORGANISMS			English	Article						petroleum; metagenomics; core microbiota; functional potential; oil fields	PETROLEUM RESERVOIR; COMMUNITY STRUCTURE; BACTERIAL GROUPS; PRODUCTION WATER; METAGENOME; DIVERSITY; GENES; DEEP; NANOARCHAEOTA; SEQUENCES	Microorganisms inhabiting subsurface petroleum reservoirs are key players in biochemical transformations. The interactions of microbial communities in these environments are highly complex and still poorly understood. This work aimed to assess publicly available metagenomes from oil reservoirs and implement a robust pipeline of genome-resolved metagenomics to decipher metabolic and taxonomic prof…	[Hidalgo, Kelly J.; de Oliveira, Valeria M.] Univ Estadual Campinas, Res Ctr Chem Biol & Agr CPQBA, Microbial Resources Div, UNICAMP, Av Alexandre Cazellato 999, BR-13148218 Paulinia, Brazil; [Hidalgo, Kelly J.] Univ Estadual Campinas, UNICAMP, Inst Biol, Grad Program Genet & Mol Biol, Rua Monteiro Lobato 255,Cidade Univ, BR-13083862 Campinas, SP, Brazil; [Sierra-Garcia, Isabel N.] Univ Aveiro, B…	Universidade Estadual de Campinas; Universidade Estadual de Campinas; Universidade de Aveiro; Universidade de Aveiro; Universidad Industrial de Santander	Hidalgo, KJ (corresponding author), Univ Estadual Campinas, Res Ctr Chem Biol & Agr CPQBA, Microbial Resources Div, UNICAMP, Av Alexandre Cazellato 999, BR-13148218 Paulinia, Brazil.; Hidalgo, KJ (corresponding author), Univ Estadual Campinas, UNICAMP, Inst Biol, Grad Program Genet & Mol Biol, Rua Monteiro Lobato 255,Cidade Univ, BR-13083862 Campinas, SP, Brazil.	khidalgo@javeriana.edu.co; inatalia.sierra@gmail.com; geralzaf@uis.edu.co; vmaia@cpqba.unicamp.br	Garcia, Isabel Natalia Sierra/Y-7477-2018; Oliveira, Valéria Maia/L-2422-2014; Hidalgo, Kelly/D-1292-2010	Garcia, Isabel Natalia Sierra/0000-0001-6373-2901; Oliveira, Valéria Maia/0000-0001-8817-4758; Hidalgo, Kelly/0000-0003-4607-3750	Departamento Administrativo de Ciencia, Tecnologia e Innovacion (COLCIENCIAS) [860-1072639324]; National Council for Scientific and Technological Development (CNPq) [309807/2020-4]	Departamento Administrativo de Ciencia, Tecnologia e Innovacion (COLCIENCIAS)(Departamento Administrativo de Ciencia, Tecnologia e Innovacion Colciencias); National Council for Scientific and Technological Development (CNPq)(Conselho Nacional de Desenvolvimento Cientifico e Tecnologico (CNPQ))	The authors are grateful to Departamento Administrativo de Ciencia, Tecnologia e Innovacion (COLCIENCIAS) for the doctoral scholarship of K.J.H, grant number 860-1072639324 and to National Council for Scientific and Technological Development (CNPq) for the Productivity in Research grant of V.M.O (grant number 309807/2020-4, Level 1B).		114	2	2	5	15	MDPI	BASEL	ST ALBAN-ANLAGE 66, CH-4052 BASEL, SWITZERLAND		2076-2607		MICROORGANISMS	Microorganisms	SEP	2021	9	9
C	Huang, YH; Ren, GL; Wei, L; Wu, XL; Yuan, HM; Song, KP		Du, ZY; Sun, XB		Huang, Yonghong; Ren, Guoling; Wei, Li; Wu, Xiaolin; Yuan, Hongmei; Song, Kaoping			Analysis of Microbial Community Succession in Daqing Oil Field	ENVIRONMENT MATERIALS AND ENVIRONMENT MANAGEMENT PTS 1-3	Advanced Materials Research		English	Proceedings Paper	International Conference of Environment Materials and Environment Management	JUL 24-25, 2010	Harbin, PEOPLES R CHINA	NE Forestry Univ, Informat Technol & Ind Engn Res Ctr		oil reservoir after polymer flooding; PCR-DGGE; the structure of community; Microbial Enhanced Oil Recovery	16S RIBOSOMAL-RNA; GENES	It is difficult to increase crude oil production for Daqing oil field by conventional technologies. In order to increase crude oil production, we make use of microbial enhanced oil recovery technology. The results showed that fluid production increased by 11 tons, oil production increased by 1.7 tons, water rate has decreased by 0.6 tons in oil reservoir after polymer flooding, North-2-4-P47 sing…	[Huang, Yonghong; Ren, Guoling; Yuan, Hongmei] Daqing Normal Univ, Coll Life Sci, Daqing 163712, Peoples R China; [Wei, Li] Harbin Inst Technol, Coll Environ Engn, Harbin 150001, Peoples R China; [Wu, Xiaolin] Daqing Oil Field Co Ltd, Explorat & Dev Res Inst, Daqing 163712, Peoples R China; [Song, Kaoping] Daqing Petrol Univ, Coll Petrol Engn, Daqing 163318, Peoples R China	Daqing Normal University; Harbin Institute of Technology; Sinopec	Huang, YH (corresponding author), Daqing Normal Univ, Coll Life Sci, Daqing 163712, Peoples R China.	yonghongh2003@yahoo.com.cn	wei, li/GSD-3630-2022; 黎, 伟/GXM-4040-2022		Research Program in Daqing Oilfield Co. Ltd. [dqc-2009-sc-ky-001]	Research Program in Daqing Oilfield Co. Ltd.	This work was supported by grants from The Research Program in Daqing Oilfield Co. Ltd(dqc-2009-sc-ky-001).		11	0	0	0	6	TRANS TECH PUBLICATIONS LTD	DURNTEN-ZURICH	KREUZSTRASSE 10, 8635 DURNTEN-ZURICH, SWITZERLAND	1022-6680		978-0-87849-259-6	ADV MATER RES-SWITZ			2010	113-116		1-3
J	Carlsson, G; Norrgren, L; Hylland, K; Tollefsen, KE				Carlsson, G.; Norrgren, L.; Hylland, K.; Tollefsen, K. E.			Toxicity Screening of Produced Water Extracts in a Zebrafish Embryo Assay	JOURNAL OF TOXICOLOGY AND ENVIRONMENTAL HEALTH-PART A-CURRENT ISSUES			English	Article; Proceedings Paper	4th Norwegian Environmental Toxicology Symposium	OCT 16-18, 2012	Tromso, NORWAY				COD GADUS-MORHUA; OIL PRODUCTION PLATFORMS; LIFE-STAGE TOXICITY; POLYCYCLIC AROMATIC-HYDROCARBONS; MEDAKA ORYZIAS-LATIPES; RECEPTOR ER AGONISTS; NORTH-SEA; DANIO-RERIO; GENE-EXPRESSION; POLYCHLORINATED-BIPHENYLS	Produced water is the largest effluent discharge from oil and gas/condensate production facilities in the North Sea. There is concern that contaminants originating from the reservoir and chemicals used in the production process may affect marine organisms. Developmental toxicity of extractable organic compounds in produced water effluents from oil and gas/condensate production platforms in the No…	[Carlsson, G.; Norrgren, L.] Swedish Univ Agr Sci, Dept Biomed Sci & Vet Publ Hlth, Uppsala, Sweden; [Hylland, K.] Univ Oslo, Dept Biosci, Oslo, Norway; [Tollefsen, K. E.] Norwegian Inst Water Res NIVA, NO-0349 Oslo, Norway	Swedish University of Agricultural Sciences; University of Oslo; Norwegian Institute for Water Research (NIVA)	Tollefsen, KE (corresponding author), Norwegian Inst Water Res NIVA, Gaustadalleen 21, NO-0349 Oslo, Norway.	ket@niva.no		Carlsson, Gunnar/0000-0002-2681-3726	Norwegian Research Council PROOF program [159113]	Norwegian Research Council PROOF program	This study is funded by the Norwegian Research Council PROOF program (project 159113 IMONIT-Integrating monitoring methods for impacts of offshore discharges to the North Sea). The authors thank Chris Harman, Eivind Farmen, Olav Boyum, Maria Carlsson, and Johan Jorgenson for technical assistance. Contributions of produced water by Norsk Hydro (Norway), Statoil (Norway) and information services by…		73	19	19	2	51	TAYLOR & FRANCIS INC	PHILADELPHIA	530 WALNUT STREET, STE 850, PHILADELPHIA, PA 19106 USA	1528-7394	1087-2620		J TOXICOL ENV HEAL A	J. Toxicol. Env. Health Part A	JUN 3	2014	77	9-11
J	Ma, L; Liang, B; Wang, LY; Zhou, L; Mbadinga, SM; Gu, JD; Mu, BZ				Ma, Lei; Liang, Bo; Wang, Li-Ying; Zhou, Lei; Mbadinga, Serge Maurice; Gu, Ji-Dong; Mu, Bo-Zhong			Microbial reduction of CO2 from injected (NaHCO3)-C-13 with degradation of n-hexadecane in the enrichment culture derived from a petroleum reservoir	INTERNATIONAL BIODETERIORATION & BIODEGRADATION			English	Article						CO2 bloconversion; Carbon dioxide utilization; Methanogenesis; Alkane degradation; Petroleum reservoir; Carbon capture and storage	CRUDE-OIL BIODEGRADATION; SP-NOV; METHANOGENIC BIODEGRADATION; PRODUCTION WATER; RIBOSOMAL-RNA; DIVERSITY; COMMUNITY; ALKANES; ARCHAEA; SLUDGE	Carbon capture and storage in deep subsurface oil reservoirs followed by subsequent microbial energy reconversion is a potentially new strategy for mitigating global warming and enhanced energy recovery simultaneously. However, our knowledge on the fate of CO2 and microbial community in response to CO2 injection is very limited. In the current study, microcosms containing both (NaHCO3)-C-13-injec…	[Ma, Lei; Liang, Bo; Wang, Li-Ying; Zhou, Lei; Mbadinga, Serge Maurice; Mu, Bo-Zhong] East China Univ Sci & Technol, State Key Lab Bioreactor Engn, 130 Meilong Rd, Shanghai 200237, Peoples R China; [Ma, Lei; Liang, Bo; Wang, Li-Ying; Zhou, Lei; Mbadinga, Serge Maurice; Mu, Bo-Zhong] East China Univ Sci & Technol, Inst Appl Chem, 130 Meilong Rd, Shanghai 200237, Peoples R China; [Gu, Ji-Dong] Univ…	East China University of Science & Technology; East China University of Science & Technology; University of Hong Kong	Mu, BZ (corresponding author), East China Univ Sci & Technol, State Key Lab Bioreactor Engn, 130 Meilong Rd, Shanghai 200237, Peoples R China.; Mu, BZ (corresponding author), East China Univ Sci & Technol, Inst Appl Chem, 130 Meilong Rd, Shanghai 200237, Peoples R China.	bzmu@ecust.edu.cn	Mbadinga, Serge Maurice/I-3789-2017; Mu, Bo-Zhong/F-4704-2017; Gu, Ji-Dong/AAO-7851-2020; Gu, Ji-Dong/AAF-2291-2019; /D-3086-2009	Mu, Bo-Zhong/0000-0002-9564-4970; /0000-0002-7082-9784	National Science Foundation of China [41530318, 41403066]; Fundamental Research Funds for the Central Universities of China [222201717017]; Research Foundation of Shanghai [15JC1401400]	National Science Foundation of China(National Natural Science Foundation of China (NSFC)); Fundamental Research Funds for the Central Universities of China(Fundamental Research Funds for the Central Universities); Research Foundation of Shanghai	This work was supported by the National Science Foundation of China (No.41530318, 41403066), the Fundamental Research Funds for the Central Universities of China (No. 222201717017), and the Research Foundation of Shanghai (No. 15JC1401400).		52	10	11	0	34	ELSEVIER SCI LTD	OXFORD	THE BOULEVARD, LANGFORD LANE, KIDLINGTON, OXFORD OX5 1GB, OXON, ENGLAND	0964-8305	1879-0208		INT BIODETER BIODEGR	Int. Biodeterior. Biodegrad.	FEB	2018	127
J	Sun, WM; Dong, YR; Gao, P; Fu, MY; Ta, KW; Li, JW				Sun, Weimin; Dong, Yiran; Gao, Pin; Fu, Meiyan; Ta, Kaiwen; Li, Jiwei			Microbial communities inhabiting oil-contaminated soils from two major oilfields in Northern China: Implications for active petroleum-degrading capacity	JOURNAL OF MICROBIOLOGY			English	Article						oil-degrading bacteria; bioremediation; microbial community analysis; Illumina sequencing	SP-NOV.; CRUDE-OIL; AROMATIC-HYDROCARBONS; TOLUENE DEGRADATION; GEN.-NOV.; BIODEGRADATION; FIELD; DIVERSITY; BACTERIUM; STRAINS	Although oilfields harbor a wide diversity of microorganisms with various metabolic potentials, our current knowledge about oil-degrading bacteria is limited because the vast majority of oil-degrading bacteria remain uncultured. In the present study, microbial communities in nine oil-contaminated soils collected from Daqing and Changqing, two of the largest oil fields in China, were characterized…	[Sun, Weimin] Rutgers State Univ, Dept Microbiol & Biochem, New Brunswick, NJ 08901 USA; [Dong, Yiran] Univ Illinois, Energy & Biosci Inst, Urbana, IL 61801 USA; [Gao, Pin] Donghua Univ, Sch Environm Sci & Engn, Shanghai 201620, Peoples R China; [Fu, Meiyan] Chengdu Univ Technol, Coll Energy Resources, Chengdu 610059, Peoples R China; [Ta, Kaiwen; Li, Jiwei] Chinese Acad Sci, Sanya Inst Deep Sea …	Rutgers State University New Brunswick; University of Illinois System; University of Illinois Urbana-Champaign; Donghua University; Chengdu University of Technology; Chinese Academy of Sciences; Institute of Deep-Sea Science & Engineering, CAS	Li, JW (corresponding author), Chinese Acad Sci, Sanya Inst Deep Sea Sci & Engn, Sanya 572000, Peoples R China.	lijiwei20025@sidsse.ac.cn	Dong, Yiran/O-6618-2015	Sun, Weimin/0000-0001-9300-6425	Strategic Priority Research Program of the Chinese Academy of Sciences [XDB06020200]; National Key Basic Research Program of China [2015CB755905]; National Natural Science Foundation of China [41376077, 41406067]; Knowledge Innovation Program of the Chinese Academy of Sciences [SIDSSE-QN-201303]; Open Fund of Key Laboratory of Marine Spill Oil Identification and Damage Assessment Technology [2013…	Strategic Priority Research Program of the Chinese Academy of Sciences(Chinese Academy of Sciences); National Key Basic Research Program of China(National Basic Research Program of China); National Natural Science Foundation of China(National Natural Science Foundation of China (NSFC)); Knowledge Innovation Program of the Chinese Academy of Sciences(Chinese Academy of SciencesKnowledge Innovation…	This research was financially supported by the Strategic Priority Research Program of the Chinese Academy of Sciences (XDB06020200), the National Key Basic Research Program of China (2015CB755905), the National Natural Science Foundation of China (41376077 and 41406067), the Knowledge Innovation Program of the Chinese Academy of Sciences (SIDSSE-QN-201303), and the Open Fund of Key Laboratory of …		57	28	34	3	94	MICROBIOLOGICAL SOCIETY KOREA	SEOUL	KOREA SCIENCE & TECHNOLOGY CENTER 803, 635-4 YEOGSAM-DONG, KANGNAM-KU, SEOUL 135-703, SOUTH KOREA	1225-8873	1976-3794		J MICROBIOL	J. Microbiol.	JUN	2015	53	6
J	Sen, R				Sen, Ramkrishna			Biotechnology in petroleum recovery: The microbial EOR	PROGRESS IN ENERGY AND COMBUSTION SCIENCE			English	Review						Microbial enhanced oil recovery; Mechanisms; Solvents; Gases; Biosurfactants; Biopolymers; Biofilms; Selective plugging; SRB; Modeling; Field trials	ENHANCED OIL-RECOVERY; BIOMASS-PLUG DEVELOPMENT; SHORT COMMUNICATION PRODUCTION; SURFACE-ACTIVE PROPERTIES; BIOSURFACTANT PRODUCTION; BACILLUS-SUBTILIS; MICROORGANISMS; PROPAGATION; FIELD; MEOR	Biotechnology has played a significant role in enhancing crude oil recovery from the depleted oil reservoirs to solve stagnant petroleum production, after a three-stage recovery process employing mechanical, physical and chemical methods. Biotechnologically enhanced oil recovery processes, known as microbial enhanced oil recovery (MEOR), involve stimulating indigenous reservoir microbes or inject…	Indian Inst Technol, Dept Biotechnol, Kharagpur 721302, W Bengal, India	Indian Institute of Technology System (IIT System); Indian Institute of Technology (IIT) - Kharagpur	Sen, R (corresponding author), Indian Inst Technol, Dept Biotechnol, Kharagpur 721302, W Bengal, India.	rksen@yahoo.com	Sen, Ramkrishna/C-8772-2014	Sen, Ramkrishna/0000-0002-6207-3307	DBT [BT/PR-6827/AAQ/03/263/2005]; Government of India; IIT, Kharagpur	DBT(Department of Biotechnology (DBT) India); Government of India; IIT, Kharagpur	I thankfully acknowledge the financial support that I have received from the DBT (Grant no.: BT/PR-6827/AAQ/03/263/2005), Government of India and my institute, IIT, Kharagpur (ISIRD Grant). I am also thankful to my parents, my wife, Anamika, and our little son, Yuvraaj Sen, for their love, support, forbearance and encouragement to complete this comprehensive review. I am grateful to Titan Oil <ht…		111	298	319	7	282	PERGAMON-ELSEVIER SCIENCE LTD	OXFORD	THE BOULEVARD, LANGFORD LANE, KIDLINGTON, OXFORD OX5 1GB, ENGLAND	0360-1285	1873-216X		PROG ENERG COMBUST	Prog. Energy Combust. Sci.	DEC	2008	34	6
J	Lv, L; Zhou, L; Wang, LY; Liu, JF; Gu, JD; Mu, BZ; Yang, SZ				Lv, Lei; Zhou, Lei; Wang, Li-Ying; Liu, Jin-Feng; Gu, Ji-Dong; Mu, Bo-Zhong; Yang, Shi-Zhong			Selective inhibition of methanogenesis by sulfate in enrichment culture with production water from low-temperature oil reservoir	INTERNATIONAL BIODETERIORATION & BIODEGRADATION			English	Article						Anaerobic degradation; Methanogenesis; Methanol; Formate; Acetate; Microbial community; Sulfate reduction	16S RIBOSOMAL-RNA; SP-NOV.; GEN. NOV.; METHYLOTROPHIC METHANOGEN; PETROLEUM RESERVOIR; REDUCING BACTERIA; MICROBIAL DIVERSITY; N-ALKANES; CD-HIT; ACETOBACTERIUM	CO2-reducing, acetoclastic and methylotrophic methanogenesis are three main biochemical pathways for biogenic methane production in subsurface environments. In this study, methanol, formate and acetate were used as substrates amended with low-temperature oilfield production fluid to establish six anaerobic enrichment settings (three with addition of sulfate as exogenous electron acceptor, another…	[Lv, Lei; Zhou, Lei; Wang, Li-Ying; Liu, Jin-Feng; Mu, Bo-Zhong; Yang, Shi-Zhong] E China Univ Sci & Technol, State Key Lab Bioreactor Engn, Shanghai 200237, Peoples R China; [Lv, Lei; Zhou, Lei; Wang, Li-Ying; Liu, Jin-Feng; Mu, Bo-Zhong; Yang, Shi-Zhong] E China Univ Sci & Technol, Inst Appl Chem, Shanghai 200237, Peoples R China; [Gu, Ji-Dong] Univ Hong Kong, Sch Biol Sci, Pokfulam Rd, Hong Ko…	East China University of Science & Technology; East China University of Science & Technology; University of Hong Kong	Yang, SZ (corresponding author), E China Univ Sci & Technol, State Key Lab Bioreactor Engn, Shanghai 200237, Peoples R China.; Yang, SZ (corresponding author), E China Univ Sci & Technol, Inst Appl Chem, Shanghai 200237, Peoples R China.	meor@ecust.edu.cn	Mu, Bo-Zhong/F-4704-2017; Gu, Ji-Dong/AAO-7851-2020; Gu, Ji-Dong/AAF-2291-2019	Mu, Bo-Zhong/0000-0002-9564-4970;	National Natural Science Foundation of China [51174092, 41403066, 31200101]; National Natural Science Foundation of China (NSFC); Research Grants Council (RGC) [41161160560]	National Natural Science Foundation of China(National Natural Science Foundation of China (NSFC)); National Natural Science Foundation of China (NSFC)(National Natural Science Foundation of China (NSFC)); Research Grants Council (RGC)(Hong Kong Research Grants Council)	This work was supported by the National Natural Science Foundation of China (Grant No. 51174092, 41403066, 31200101), the National Natural Science Foundation of China (NSFC) and the Research Grants Council (RGC) Joint Research Fund (Grant No. 41161160560).		62	17	17	0	47	ELSEVIER SCI LTD	OXFORD	THE BOULEVARD, LANGFORD LANE, KIDLINGTON, OXFORD OX5 1GB, OXON, ENGLAND	0964-8305	1879-0208		INT BIODETER BIODEGR	Int. Biodeterior. Biodegrad.	MAR	2016	108
C	Jia, JL; Li, GH		Li, G; Jia, Z; Fu, Z		Jia, J. L.; Li, G. H.			Microbial Communities of oil contaminated soils in oilfields of China	2008 PROCEEDINGS OF INFORMATION TECHNOLOGY AND ENVIRONMENTAL SYSTEM SCIENCES: ITESS 2008, VOL 3			English	Proceedings Paper	International Conference on Informational Technology and Environmental System Science	MAY 15-17, 2008	Henan Polytechn Univ, Jiaozuo, PEOPLES R CHINA		Henan Polytechn Univ	oil contaminated soils; oilfields; microbial communities; PCR-DGGE	GRADIENT GEL-ELECTROPHORESIS; 16S RIBOSOMAL-RNA; GENE FRAGMENTS; BIOREMEDIATION; DNA	As the key factor in the bioremediation of oil contaminated soils, the microbial communities of soils in different regional area of China, including the microbial amounts, activities, diversity and the relationship of which, were investigated in detail in this paper. The microbiological diversities in the soils of the oilfields were evaluated through the PCR-DGGE (denatured gradient gel electroph…	[Jia, J. L.; Li, G. H.] China Univ Min & Technol Beijing, Dept Environm Sci & Engn, Beijing 100083, Peoples R China	China University of Mining & Technology	Jia, JL (corresponding author), China Univ Min & Technol Beijing, Dept Environm Sci & Engn, Beijing 100083, Peoples R China.	jjl@cumtb.edu.cn							17	0	0	0	2	PUBLISHING HOUSE ELECTRONICS INDUSTRY	BEIJING	PO BOX 173 WANSHOU ROAD, BEIJING 100036, PEOPLES R CHINA			978-7-121-06304-6				2008
J	Wang, YP; Liang, JD; Wang, JX; Gao, S				Wang, Yiping; Liang, Jidong; Wang, Jinxing; Gao, Sha			Combining stable carbon isotope analysis and petroleum-fingerprinting to evaluate petroleum contamination in the Yanchang oilfield located on loess plateau in China	ENVIRONMENTAL SCIENCE AND POLLUTION RESEARCH			English	Article						Total petroleumhydrocarbon (TPH); N-alkanes; Polycyclic aromatic hydrocarbons (PAHs); Carbon isotope ratios (delta C-13); Loess	POLYCYCLIC AROMATIC-HYDROCARBONS; INDIVIDUAL N-ALKANES; CRUDE-OIL; NONAROMATIC HYDROCARBONS; COASTAL ENVIRONMENT; SURFACE SEDIMENTS; SOIL PROPERTIES; HEAVY-METALS; BIODEGRADATION; BIOREMEDIATION	This study evaluated petroleum contamination in the Yanchang (Shaanxi Yanchang Petroleum (Group) Co., Ltd.) oilfield, located in the loess plateau region of northern Shaanxi, China. Surface soil and sediment samples were collected from the wasteland, farmland, and riverbed in this area to assess the following parameters: total petroleum hydrocarbon (TPH), n-alkanes, polycyclic aromatic hydrocarbo…	[Wang, Yiping; Liang, Jidong; Wang, Jinxing; Gao, Sha] Xi An Jiao Tong Univ, Dept Environm Engn, Xian 710049, Shaanxi, Peoples R China; [Liang, Jidong] Chinese Acad Sci, Inst Earth Environm, State Key Lab Loess & Quaternary Geol, Xian 710061, Shaanxi, Peoples R China; [Gao, Sha] Changan Univ, Dept Environm Sci, Xian 710054, Shaanxi, Peoples R China	Xi'an Jiaotong University; Chinese Academy of Sciences; Institute of Earth Environment, CAS; Chang'an University	Liang, JD (corresponding author), Xi An Jiao Tong Univ, Dept Environm Engn, Xian 710049, Shaanxi, Peoples R China.; Liang, JD (corresponding author), Chinese Acad Sci, Inst Earth Environm, State Key Lab Loess & Quaternary Geol, Xian 710061, Shaanxi, Peoples R China.	jidongl@mail.xjtu.edu.cn			National Natural Science Foundation of China [31670510]; Funding of State Key Laboratory of Loess and Quaternary Geology in China; Fundamental Research Funds for the Central Universities in China	National Natural Science Foundation of China(National Natural Science Foundation of China (NSFC)); Funding of State Key Laboratory of Loess and Quaternary Geology in China; Fundamental Research Funds for the Central Universities in China	This work was supported by the National Natural Science Foundation of China (Grant No. 31670510), Funding of State Key Laboratory of Loess and Quaternary Geology in China (Grant No. SKLLQG), and the Fundamental Research Funds for the Central Universities in China.		56	27	32	4	75	SPRINGER HEIDELBERG	HEIDELBERG	TIERGARTENSTRASSE 17, D-69121 HEIDELBERG, GERMANY	0944-1344	1614-7499		ENVIRON SCI POLLUT R	Environ. Sci. Pollut. Res.	JAN	2018	25	3
J	BEHLULGIL, K; MEHMETOGLU, T; DONMEZ, S				BEHLULGIL, K; MEHMETOGLU, T; DONMEZ, S			APPLICATION OF MICROBIAL ENHANCED OIL-RECOVERY TECHNIQUE TO A TURKISH HEAVY OIL	APPLIED MICROBIOLOGY AND BIOTECHNOLOGY			English	Note								Microbial enhanced oil recovery utilizes microorganisms and their metabolic products to improve the recovery of crude oil from reservoir rocks. In this study an anaerobic bacterium, Clostridium acetobutylicum was injected into a one-dimensional model reservoir containing a Turkish heavy oil (Raman oil) at 38-degrees-C. This injection was followed by water flooding after a suitable shut-in period.…	MIDDLE E TECH UNIV,DEPT PETR ENGN,ANKARA 06531,TURKEY; UNIV ANKARA,FAC AGR,ANKARA,TURKEY	Middle East Technical University; Ankara University				Behlulgil, Ahmet Kemal/0000-0002-8856-6900					4	16	20	0	8	SPRINGER VERLAG	NEW YORK	175 FIFTH AVE, NEW YORK, NY 10010	0175-7598			APPL MICROBIOL BIOT	Appl. Microbiol. Biotechnol.	MAR	1992	36	6
J	Guan, J; Xia, LP; Wang, LY; Liu, JF; Gu, JD; Mu, BZ				Guan, Jing; Xia, Li-Ping; Wang, Li-Ying; Liu, Jin-Feng; Gu, Ji-Dong; Mu, Bo-Zhong			Diversity and distribution of sulfate-reducing bacteria in four petroleum reservoirs detected by using 16S rRNA and dsrAB genes	INTERNATIONAL BIODETERIORATION & BIODEGRADATION			English	Article						Petroleum microbiology; Sulfate-reducing bacteria; Corrosion; CCA; 16S rRNA gene; dsrAB genes	MULTIPLE LATERAL TRANSFERS; SP-NOV; MOLECULAR CHARACTERIZATION; REDUCTASE GENES; DEEP SUBSURFACE; SP. NOV.; COMMUNITY; TEMPERATURE; PHYLOGENY; ORIGIN	Microbial sulfate reduction, an important metabolic process in petroleum reservoirs, is widely known as a major contributor to microbial influenced corrosion and deterioration of oil quality. To better control oil field corrosion and oil degradation caused by the sulfate-reducing bacteria (SRBs), the community structure and composition of SRBs in four oil reservoirs were investigated in this stud…	[Guan, Jing; Xia, Li-Ping; Wang, Li-Ying; Liu, Jin-Feng; Mu, Bo-Zhong] E China Univ Sci & Technol, State Key Lab Bioreactor Engn, Shanghai 200237, Peoples R China; [Guan, Jing; Xia, Li-Ping; Wang, Li-Ying; Liu, Jin-Feng; Mu, Bo-Zhong] E China Univ Sci & Technol, Inst Appl Chem, Shanghai 200237, Peoples R China; [Gu, Ji-Dong] Univ Hong Kong, Sch Biol Sci, Hong Kong, Hong Kong, Peoples R China	East China University of Science & Technology; East China University of Science & Technology; University of Hong Kong	Mu, BZ (corresponding author), E China Univ Sci & Technol, State Key Lab Bioreactor Engn, Shanghai 200237, Peoples R China.	bzmu@ecust.edu.cn	Gu, Ji-Dong/AAO-7851-2020; Gu, Ji-Dong/AAF-2291-2019; Mu, Bo-Zhong/F-4704-2017	Mu, Bo-Zhong/0000-0002-9564-4970	National Natural Science Foundation of China [41073055]; 863 Program [2009AA063503]	National Natural Science Foundation of China(National Natural Science Foundation of China (NSFC)); 863 Program(National High Technology Research and Development Program of China)	This work was supported by the National Natural Science Foundation of China (Grant No. 41073055) and the 863 Program (Grant No. 2009AA063503).		64	64	68	1	116	ELSEVIER SCI LTD	OXFORD	THE BOULEVARD, LANGFORD LANE, KIDLINGTON, OXFORD OX5 1GB, OXON, ENGLAND	0964-8305	1879-0208		INT BIODETER BIODEGR	Int. Biodeterior. Biodegrad.	JAN	2013	76
J	Chen, J; Liu, YF; Zhou, L; Irfan, M; Hou, ZW; Li, W; Mbadinga, SM; Liu, JF; Yang, SZ; Wu, XL; Gu, JD; Mu, BZ				Chen, Jing; Liu, Yi-Fan; Zhou, Lei; Irfan, Muhammad; Hou, Zhao-Wei; Li, Wei; Mbadinga, Serge Maurice; Liu, Jin-Feng; Yang, Shi-Zhong; Wu, Xiao-Lin; Gu, Ji-Dong; Mu, Bo-Zhong			Long-chain n-alkane biodegradation coupling to methane production in an enriched culture from production water of a high-temperature oil reservoir	AMB EXPRESS			English	Article						Anaerobic biodegradation; Long-chain n-alkanes; High-temperature oil; petroleum reservoir; Methanogenesis; Metabolic pathway	CRUDE-OIL; ANAEROBIC BIODEGRADATION; DENITRIFYING BACTERIUM; REDUCING BACTERIUM; DEGRADATION; METABOLISM; NITRATE; MICROORGANISMS; HYDROCARBONS; INVOLVEMENT	Paraffinic n-alkanes (C22-C30), crucial portions of residual oil, are generally considered to be difficult to be biodegraded owing to their general solidity at ambient temperatures and low water solubility, rendering relatively little known about metabolic processes in different methanogenic hydrocarbon-contaminated environments. Here, we established a methanogenic C22-C30 n-alkane-degrading enri…	[Chen, Jing; Liu, Yi-Fan; Zhou, Lei; Irfan, Muhammad; Mbadinga, Serge Maurice; Liu, Jin-Feng; Yang, Shi-Zhong; Mu, Bo-Zhong] East China Univ Sci & Technol, State Key Lab Bioreactor Engn, 130 Meilong Rd, Shanghai 200237, Peoples R China; [Chen, Jing; Liu, Yi-Fan; Zhou, Lei; Irfan, Muhammad; Mbadinga, Serge Maurice; Liu, Jin-Feng; Yang, Shi-Zhong; Mu, Bo-Zhong] East China Univ Sci & Technol, Sch Ch…	East China University of Science & Technology; East China University of Science & Technology; China National Petroleum Corporation; Daqing Oilfield Company Limited; University of Hong Kong; University of Engineering & Technology Lahore; East China University of Science & Technology	Mu, BZ (corresponding author), East China Univ Sci & Technol, State Key Lab Bioreactor Engn, 130 Meilong Rd, Shanghai 200237, Peoples R China.; Mu, BZ (corresponding author), East China Univ Sci & Technol, Sch Chem & Mol Engn, 130 Meilong Rd, Shanghai 200237, Peoples R China.; Wu, XL (corresponding author), Daqing Oilfield Co Ltd, Res Inst, PetroChina, Daqing 163712, Heilongjiang, Peoples R China…	wuxldq@petrochina.com.cn; bzmu@ecust.edu.cn	Mbadinga, Serge Maurice/I-3789-2017; Mu, Bo-Zhong/F-4704-2017; Gu, Ji-Dong/AAO-7851-2020	Mu, Bo-Zhong/0000-0002-9564-4970;	National Natural Science Foundation of China [41530318, 41373070, 41807324]; NSFC/RGC Joint Research Fund [41161160560]; Shanghai International Collaboration Program [18230743300]; Fundamental Research Funds for the Central Universities [222201817017, 50321101917017, 22221818014]; Research Program of State Key Laboratory of Bioreactor Engineering	National Natural Science Foundation of China(National Natural Science Foundation of China (NSFC)); NSFC/RGC Joint Research Fund; Shanghai International Collaboration Program; Fundamental Research Funds for the Central Universities(Fundamental Research Funds for the Central Universities); Research Program of State Key Laboratory of Bioreactor Engineering	This work was supported by the National Natural Science Foundation of China (Grants No. 41530318, 41373070, 41807324), NSFC/RGC Joint Research Fund (No. 41161160560), the Shanghai International Collaboration Program (18230743300), the Fundamental Research Funds for the Central Universities (No. 222201817017, 50321101917017, 22221818014) and the Research Program of State Key Laboratory of Bioreact…		63	7	7	7	34	SPRINGER	NEW YORK	ONE NEW YORK PLAZA, SUITE 4600, NEW YORK, NY, UNITED STATES	2191-0855			AMB EXPRESS	AMB Express	APR 7	2020	10	1
J	Ruiz-Ramos, DV; Fisher, CR; Baums, IB				Ruiz-Ramos, Dannise V.; Fisher, Charles R.; Baums, Iliana B.			Stress response of the black coral Leiopathes glaberrima when exposed to sub-lethal amounts of crude oil and dispersant	ELEMENTA-SCIENCE OF THE ANTHROPOCENE			English	Article						Oil spill; gene expression; polymorphism; corals; dispersant	CONTINENTAL-SLOPE; NATURAL OIL; TOXICITY; IMPACT; SPILL; BIODEGRADATION; COMMUNITIES; GENERATION; PROFILES; TALE	The 2010 Deep Water Horizon oil well failure released billions of gallons of crude oil into the deep Gulf of Mexico, and, combined with chemical dispersants, this oil caused significant coral mortality. However, the mechanisms by which oil and dispersed oil impact deep marine fauna are not well understood. Here, we investigate the effects of oil and dispersed oil on a black coral common in the de…	[Ruiz-Ramos, Dannise V.; Fisher, Charles R.; Baums, Iliana B.] Penn State Univ, Dept Biol, University Pk, PA 16802 USA	Pennsylvania Commonwealth System of Higher Education (PCSHE); Pennsylvania State University; Pennsylvania State University - University Park	Ruiz-Ramos, DV (corresponding author), Univ Calif Merced, Sch Nat Sci, Merced, CA 95340 USA.	dannise.ruiz@gmail.com	Baums, Iliana Brigitta/G-6435-2010	Baums, Iliana Brigitta/0000-0001-6463-7308; Ruiz-Ramos, Dannise/0000-0001-7282-0380	Gulf of Mexico Research Initiative	Gulf of Mexico Research Initiative	Funding was provided by the Gulf of Mexico Research Initiative to support the Ecosystem Impacts of Oil and Gas Inputs to the Gulf (ECOGIG) consortium.		61	7	7	1	19	UNIV CALIFORNIA PRESS	OAKLAND	155 GRAND AVE, SUITE 400, OAKLAND, CA 94612-3758 USA	2325-1026			ELEMENTA-SCI ANTHROP	Elementa-Sci. Anthrop.	DEC 14	2017	5
J	Gray, ND; Sherry, A; Grant, RJ; Rowan, AK; Hubert, CRJ; Callbeck, CM; Aitken, CM; Jones, DM; Adams, JJ; Larter, SR; Head, IM				Gray, N. D.; Sherry, A.; Grant, R. J.; Rowan, A. K.; Hubert, C. R. J.; Callbeck, C. M.; Aitken, C. M.; Jones, D. M.; Adams, J. J.; Larter, S. R.; Head, I. M.			The quantitative significance of Syntrophaceae and syntrophic partnerships in methanogenic degradation of crude oil alkanes	ENVIRONMENTAL MICROBIOLOGY			English	Article							16S RIBOSOMAL-RNA; GRADIENT GEL-ELECTROPHORESIS; POLYMERASE-CHAIN-REACTION; MICROBIAL COMMUNITY; SP. NOV.; MOLECULAR CHARACTERIZATION; ANAEROBIC MICROORGANISMS; CONTAMINATED AQUIFER; PETROLEUM RESERVOIRS; SANDS TAILINGS	Libraries of 16S rRNA genes cloned from methanogenic oil degrading microcosms amended with North Sea crude oil and inoculated with estuarine sediment indicated that bacteria from the genera Smithella (Deltaproteobacteria, Syntrophaceace) and Marinobacter sp. (Gammaproteobacteria) were enriched during degradation. Growth yields and doubling times (36 days for both Smithella and Marinobacter) were …	[Gray, N. D.; Sherry, A.; Grant, R. J.; Rowan, A. K.; Hubert, C. R. J.; Callbeck, C. M.; Aitken, C. M.; Jones, D. M.; Larter, S. R.; Head, I. M.] Newcastle Univ, Sch Civil Engn & Geosci, Newcastle Upon Tyne NE1 7RU, Tyne & Wear, England; [Adams, J. J.; Larter, S. R.] Univ Calgary, Dept Geosci, Calgary, AB T2N 1N4, Canada; [Callbeck, C. M.] Univ Calgary, Dept Biol Sci, Calgary, AB T2N 1N4, Canada	Newcastle University - UK; University of Calgary; University of Calgary	Gray, ND (corresponding author), Newcastle Univ, Sch Civil Engn & Geosci, Newcastle Upon Tyne NE1 7RU, Tyne & Wear, England.	n.d.gray@ncl.ac.uk	Abu Laban, Nidal/E-5809-2011; Callbeck, Cameron M./AAP-1076-2021; Callbeck, Cameron/O-9769-2018; Sherry, Angela/A-3293-2012; Sherry, Angela/AAD-9302-2019	Callbeck, Cameron M./0000-0001-7602-3338; Callbeck, Cameron/0000-0001-7602-3338; Sherry, Angela/0000-0003-2642-5376; Sherry, Angela/0000-0003-2642-5376; gray, neil/0000-0002-2395-4320; Larter, Stephen/0000-0001-7195-1477; Hubert, Casey/0000-0002-8691-8116; Head, Ian/0000-0002-5373-162X	BACCHUS2 biodegradation consortium; Natural Environment Research Council [NE/E01657X/1, FEMS 2007-1]; NERC [NE/E01657X/1, dml010007] Funding Source: UKRI; Natural Environment Research Council [dml010007] Funding Source: researchfish	BACCHUS2 biodegradation consortium; Natural Environment Research Council(UK Research & Innovation (UKRI)Natural Environment Research Council (NERC)); NERC(UK Research & Innovation (UKRI)Natural Environment Research Council (NERC)); Natural Environment Research Council(UK Research & Innovation (UKRI)Natural Environment Research Council (NERC))	We thank members of the BACCHUS2 biodegradation consortium for financial support, discussions and permission to publish. The BACCHUS2 members are Agip ENI, BP/Amoco, Chevron Texaco, Conoco Phillips, StatoilHydro, Petrobras, Saudi Aramco, Shell, Total and Woodside. Financial support was also provided by the Natural Environment Research Council (Grant NE/E01657X/1 to IMH, NDG and DMJ and a Federati…		79	179	185	3	125	WILEY	HOBOKEN	111 RIVER ST, HOBOKEN 07030-5774, NJ USA	1462-2912	1462-2920		ENVIRON MICROBIOL	Environ. Microbiol.	NOV	2011	13	11
J	Gao, S; Liang, JD; Teng, TT; Zhang, M				Gao, Sha; Liang, Jidong; Teng, Tingting; Zhang, Man			Petroleum contamination evaluation and bacterial community distribution in a historic oilfield located in loess plateau in China	APPLIED SOIL ECOLOGY			English	Article						Petroleum contamination; Petroleum fingerprinting; 16Sr RNA sequencing; Bacterial community	POLYCYCLIC AROMATIC-HYDROCARBONS; WASTE-WATER TREATMENTS; MICROBIAL COMMUNITY; DEGRADING BACTERIA; SP NOV.; GEN. NOV.; MARINE-SEDIMENTS; ORGANIC-MATTER; DIESEL OIL; BALTIC SEA	In this study, petroleum contamination and the corresponding distribution of bacterial communities in the Yanchang oilfield, a historic oilfield in north China was evaluated. Surface soil samples and river sediment samples near the oilfield were collected and analyzed for the total petroleum hydrocarbons (TPHs), n-alkanes, polycyclic aromatic hydrocarbons (PAHs), bacterial biodiversity, and envir…	[Gao, Sha; Liang, Jidong; Teng, Tingting; Zhang, Man] Xi An Jiao Tong Univ, Dept Environm Engn, Xian 710049, Shaanxi, Peoples R China; [Liang, Jidong] Chinese Acad Sci, Inst Earth Environm, State Key Lab Loess & Quaternary Geol, Xian 710061, Shaanxi, Peoples R China	Xi'an Jiaotong University; Chinese Academy of Sciences; Institute of Earth Environment, CAS	Liang, JD (corresponding author), Xi An Jiao Tong Univ, Dept Environm Engn, Xian 710049, Shaanxi, Peoples R China.	jidongl@mail.xjtu.edu.cn			National Natural Science Foundation of China [31670510]; State Key Laboratory of Loess and Quaternary Geology in China [SKLLQG]; Fundamental Research Funds for the Central Universities in China	National Natural Science Foundation of China(National Natural Science Foundation of China (NSFC)); State Key Laboratory of Loess and Quaternary Geology in China; Fundamental Research Funds for the Central Universities in China	This study was supported by the National Natural Science Foundation of China (Grant No. 31670510), Funding of State Key Laboratory of Loess and Quaternary Geology in China (Grant No. SKLLQG), and the Fundamental Research Funds for the Central Universities in China.		112	46	48	13	138	ELSEVIER SCIENCE BV	AMSTERDAM	PO BOX 211, 1000 AE AMSTERDAM, NETHERLANDS	0929-1393	1873-0272		APPL SOIL ECOL	Appl. Soil Ecol.	APR	2019	136
J	Fan, KQ; Feng, QM; Li, K; Lin, JZ; Wang, WD; Cao, YB; Gai, HJ; Song, HB; Huang, TT; Zhu, QH; Xiao, M				Fan, Kaiqi; Feng, Qingmin; Li, Kun; Lin, Junzhang; Wang, Weidong; Cao, Yanbin; Gai, Hengjun; Song, Hongbing; Huang, Tingting; Zhu, Quanhong; Xiao, Meng			The metabolism of pyrene by a novel Altererythrobacter sp. with in-situ co-substrates: A mechanistic analysis based on pathway, genomics, and enzyme activity	CHEMOSPHERE			English	Article						High molecular weight polycyclic aromatic; hydrocarbons; Altererythrobacter sp; Whole genome; Degradation pathways; Co-substrate	AROMATIC-HYDROCARBON BIODEGRADATION; PHENANTHRENE DEGRADATION; DNA-SEQUENCE; NAPHTHALENE; GENES; IDENTIFICATION	Using co-substrates to enhance the metabolic activity of microbes is an effective way for high-molecular-weight polycyclic aromatic hydrocarbons removal in petroleum-contaminated environments. However, the long degradation period and exhausting substrates limit the enhancement of metabolic activity. In this study, Altererythrobacter sp. N1 was screened from petroleum-contaminated soil in Shengli …	[Fan, Kaiqi; Feng, Qingmin; Li, Kun; Gai, Hengjun; Song, Hongbing; Huang, Tingting; Zhu, Quanhong; Xiao, Meng] Qingdao Univ Sci & Technol, State Key Lab Base Ecochem Engn Coll Chem Engn, Qingdao 266042, Peoples R China; [Lin, Junzhang; Wang, Weidong; Cao, Yanbin] Shengli Oil Field Ltd Co, SinoPEC, Oil Prod Res Inst, Dongying 257000, Peoples R China; [Xiao, Meng] 53 Zhengzhou Rd, Qingdao 266042, S…	Qingdao University of Science & Technology; Sinopec	Xiao, M (corresponding author), 53 Zhengzhou Rd, Qingdao 266042, Shandong, Peoples R China.	1054467989@qq.com; weiliangi@qq.com; 2508858324@qq.com; 897770954@qq.com; wangweidong168.slyt@sinopec.com; caoyanbin177.slyt@sinopec.com; hjgai@126.com; cehbsong@qust.edu.cn; huangtingting@qust.edu.cn; zhuqh87@163.com; mengx_edu@163.com			National Natural Science Foundation of China, China; [41802121]; [21978143]; [21878164]	National Natural Science Foundation of China, China(National Natural Science Foundation of China (NSFC)); ; ;	This investigation was financially supported by the National Natural Science Foundation of China, China (Nos. 41802121, 21978143 and 21878164) .		27	0	0	16	16	PERGAMON-ELSEVIER SCIENCE LTD	OXFORD	THE BOULEVARD, LANGFORD LANE, KIDLINGTON, OXFORD OX5 1GB, ENGLAND	0045-6535	1879-1298		CHEMOSPHERE	Chemosphere	NOV	2022	307		1
J	D'Ugo, E; Bruno, M; Mukherjee, A; Chattopadhyay, D; Giuseppetti, R; De Pace, R; Magurano, F				D'Ugo, Emilio; Bruno, Milena; Mukherjee, Arghya; Chattopadhyay, Dhrubajyoti; Giuseppetti, Roberto; De Pace, Rita; Magurano, Fabio			Characterization of microbial response to petroleum hydrocarbon contamination in a lacustrine ecosystem	ENVIRONMENTAL SCIENCE AND POLLUTION RESEARCH			English	Article						Lake Pertusillo; Petroleum hydrocarbon; Aromatic hydrocarbon degradation; Lake microbiome; Oil spill; Metagenomics; Freshwater ecosystem; Bioinformatics; Metabolic reconstruction; Sustainable use of waters	POLYCYCLIC AROMATIC-HYDROCARBONS; DEGRADING BACTERIA; FRESH-WATER; VAL DAGRI; INDUCED SEISMICITY; LOW-TEMPERATURE; CRUDE-OIL; DEGRADATION; COMMUNITIES; SEDIMENTS	Microbiomes of freshwater basins intended for human use remain poorly studied, with very little known about the microbial response to in situ oil spills. Lake Pertusillo is an artificial freshwater reservoir in Basilicata, Italy, and serves as the primary source of drinking water for more than one and a half million people in the region. Notably, it is located in close proximity to one of the lar…	[D'Ugo, Emilio; Giuseppetti, Roberto; Magurano, Fabio] Natl Inst Hlth, Dept Infect Dis, Viale Regina Elena 299, I-00161 Rome, Italy; [Bruno, Milena] Natl Inst Hlth, Core Facil, Rome, Italy; [Mukherjee, Arghya; Chattopadhyay, Dhrubajyoti] Univ Calcutta, Ctr Genet Engn, Kolkata, W Bengal, India; [Mukherjee, Arghya; Chattopadhyay, Dhrubajyoti] Univ Calcutta, Dept Biotechnol, Kolkata, W Bengal, India…	Istituto Superiore di Sanita (ISS); Istituto Superiore di Sanita (ISS); University of Calcutta; University of Calcutta	D'Ugo, E (corresponding author), Natl Inst Hlth, Dept Infect Dis, Viale Regina Elena 299, I-00161 Rome, Italy.	emilio.dugo@iss.it; milena.bruno@iss.it; arghya1611@gmail.com; roberto.giuseppetti@iss.it; rita.depace@izspb.it; fabio.magurano@iss.it	D'Ugo, Emilio/AAA-6636-2021; Giuseppetti, Roberto/AAA-6508-2021; MAGURANO, FABIO/B-9975-2016	D'Ugo, Emilio/0000-0001-5852-7575; Giuseppetti, Roberto/0000-0001-9958-164X; MAGURANO, FABIO/0000-0002-0394-7043; Mukherjee, Arghya/0000-0002-8996-9971					45	5	6	7	17	SPRINGER HEIDELBERG	HEIDELBERG	TIERGARTENSTRASSE 17, D-69121 HEIDELBERG, GERMANY	0944-1344	1614-7499		ENVIRON SCI POLLUT R	Environ. Sci. Pollut. Res.	MAY	2021	28	20
J	Wei, ZB; Moldowan, JM; Peters, KE; Wang, Y; Xiang, W				Wei, Zhibin; Moldowan, J. Michael; Peters, Kenneth E.; Wang, Ye; Xiang, Willie			The abundance and distribution of diamondoids in biodegraded oils from the San Joaquin Valley: Implications for biodegradation of diamondoids in petroleum reservoirs	ORGANIC GEOCHEMISTRY			English	Article							MICROBIAL STEREODIFFERENTIATING REDUCTION; THERMAL MATURITY; BARROW SUBBASIN; HYDROCARBONS; HOPANES; 25-NORHOPANES; INDICATORS; BASIN	The biodegradability of diamondoids was investigated using a collection of crude oil samples from the San Joaquin Valley, California, that had been biodegraded to varying extent in the reservoir. Our results show that diamondoids are subjected to biodegradation, which is selective as well as stepwise. Adamantanes are generally more susceptible to biodegradation than other diamondoids, such as dia…	Stanford Univ, Dept Geol & Environm Sci, Stanford, CA 94305 USA; US Geol Survey, Menlo Pk, CA 94025 USA; US Geol Survey, Palo Alto, CA 94303 USA	Stanford University; United States Department of the Interior; United States Geological Survey; United States Department of the Interior; United States Geological Survey	Wei, ZB (corresponding author), ExxonMobil Upstream Res Co, 3120 Buffalo Speedway, Houston, TX 77025 USA.	zhibin.wei@exxonmobil.com							41	50	70	0	24	PERGAMON-ELSEVIER SCIENCE LTD	OXFORD	THE BOULEVARD, LANGFORD LANE, KIDLINGTON, OXFORD OX5 1GB, ENGLAND	0146-6380	1873-5290		ORG GEOCHEM	Org. Geochem.		2007	38	11
J	Baniasadi, H; Kamari, A; Heidararabi, S; Mohammadi, AH; Hemmati-Sarapardeh, A				Baniasadi, Hamid; Kamari, Arash; Heidararabi, Sepehr; Mohammadi, Amir H.; Hemmati-Sarapardeh, Abdolhossein			Rapid method for the determination of solution gas-oil ratios of petroleum reservoir fluids	JOURNAL OF NATURAL GAS SCIENCE AND ENGINEERING			English	Article						PVT; Solution gas oil ratio; Gene expression programming; Model; Prediction	PVT PROPERTIES; WAX DEPOSITION; CRUDE OILS; MODEL; PREDICTION; VISCOSITY; PRESSURE; SYSTEMS	Accurate determination of pressure-volume-temperature (PVT) properties of petroleum reservoirs is essential in material balance calculations, inflow performance, well-test analysis, reservoir simulation, etc. Ideally, those data should be obtained experimentally; however, experimental measurements require accurate and enough sampling, and are time consuming, expensive and tedious. Therefore, seek…	[Baniasadi, Hamid] Amirkabir Univ Technol, Dept Petr Engn, Tehran, Iran; [Kamari, Arash; Mohammadi, Amir H.] Univ KwaZulu Natal, Sch Engn, Thermodynam Res, ZA-4041 Durban, South Africa; [Heidararabi, Sepehr] Univ Tehran, Fac Environm, Tehran, Iran; [Mohammadi, Amir H.] IRGCP, Paris, France; [Hemmati-Sarapardeh, Abdolhossein] Islamic Azad Univ, Kerman Branch, Young Researchers & Elites Club, Kerma…	Amirkabir University of Technology; University of Kwazulu Natal; University of Tehran; Islamic Azad University	Mohammadi, AH (corresponding author), IRGCP, Paris, France.	a.h.m@irgcp.fr; aut.hemmati@gmail.com	Sarapardeh, Abdolhossein Hemmati/M-5047-2019; Hemmati-Sarapardeh, Abdolhossein/P-4053-2018	Sarapardeh, Abdolhossein Hemmati/0000-0002-5889-150X; Hemmati-Sarapardeh, Abdolhossein/0000-0002-5889-150X					60	14	15	0	7	ELSEVIER SCI LTD	OXFORD	THE BOULEVARD, LANGFORD LANE, KIDLINGTON, OXFORD OX5 1GB, OXON, ENGLAND	1875-5100	2212-3865		J NAT GAS SCI ENG	J. Nat. Gas Sci. Eng.	MAY	2015	24
J	Liu, JF; Sun, XB; Yang, GC; Mbadinga, SM; Gu, JD; Mu, BZ				Liu, Jin-Feng; Sun, Xiao-Bo; Yang, Guang-Chao; Mbadinga, Serge M.; Gu, Ji-Dong; Mu, Bo-Zhong			Analysis of microbial communities in the oil reservoir subjected to CO2-flooding by using functional genes as molecular biomarkers for microbial CO2 sequestration	FRONTIERS IN MICROBIOLOGY			English	Article						CO2 fixation; bioconversion; methane; functional genes; oil reservoir; microbial communities	16S RIBOSOMAL-RNA; SULFATE-REDUCING BACTERIA; METHANOGENIC ARCHAEA; PETROLEUM RESERVOIRS; METHANOCULLEUS SPP.; CARBON METABOLISM; ACID CYCLE; DIVERSITY; FIXATION; STORAGE	Sequestration of CO2 in oil reservoirs is considered to be one of the feasible options for mitigating atmospheric CO2 building up and also for the in situ potential bioconversion of stored CO2 to methane. However, the information on these functional microbial communities and the impact of CO2 storage on them is hardly available. In this paper a comprehensive molecular survey was performed on micr…	[Liu, Jin-Feng; Sun, Xiao-Bo; Yang, Guang-Chao; Mbadinga, Serge M.; Mu, Bo-Zhong] E China Univ Sci & Technol, State Key Lab Bioreactor Engn, Shanghai 200237, Peoples R China; [Liu, Jin-Feng; Sun, Xiao-Bo; Yang, Guang-Chao; Mbadinga, Serge M.; Mu, Bo-Zhong] Univ Hong Kong, Inst Appl Chem, Hong Kong, Hong Kong, Peoples R China; [Gu, Ji-Dong] Univ Hong Kong, Sch Biol Sci, Hong Kong, Hong Kong, Peopl…	East China University of Science & Technology; University of Hong Kong; University of Hong Kong	Gu, JD (corresponding author), Univ Hong Kong, Sch Biol Sci, Hong Kong, Hong Kong, Peoples R China.	jdgu@hkucc.hku.hk; bzmu@ecust.edu.cn	Mbadinga, Serge Maurice/I-3789-2017; Gu, Ji-Dong/AAF-2291-2019; Mu, Bo-Zhong/F-4704-2017; Gu, Ji-Dong/AAO-7851-2020	Mu, Bo-Zhong/0000-0002-9564-4970; Mbadinga, Serge Maurice/0000-0001-9802-4251	National Natural Science Foundation of China [41273084]; NSFC/RGC Joint Research Fund [41161160560]	National Natural Science Foundation of China(National Natural Science Foundation of China (NSFC)); NSFC/RGC Joint Research Fund	This work was supported by the National Natural Science Foundation of China (Grant No. 41273084) and the NSFC/RGC Joint Research Fund (No. 41161160560).		61	34	38	6	65	FRONTIERS MEDIA SA	LAUSANNE	AVENUE DU TRIBUNAL FEDERAL 34, LAUSANNE, CH-1015, SWITZERLAND	1664-302X			FRONT MICROBIOL	Front. Microbiol.	MAR 31	2015	6
J	Grundger, F; Jimenez, N; Thielemann, T; Straaten, N; Luders, W; Richnow, HH; Kruger, M				Gruendger, Friederike; Jimenez, Nuria; Thielemann, Thomas; Straaten, Nontje; Lueders, Wilmann; Richnow, Hans-Hermann; Krueger, Martin			Microbial methane formation in deep aquifers of a coal-bearing sedimentary basin, Germany	FRONTIERS IN MICROBIOLOGY			English	Article						methanogenesis; Cenozoic sediments; fluvial deposits; stable isotope fractionation; methanogenic hydrocarbon degradation; methanogenic archaea; coal	REAL-TIME PCR; RIBOSOMAL-RNA SEQUENCES; POWDER RIVER-BASIN; SP-NOV.; METHYLOTROPHIC METHANOGEN; PETROLEUM RESERVOIR; REDUCING CONDITIONS; NATURAL GASES; PURE CULTURES; CRUDE-OIL	Coal-bearing sediments are major reservoirs of organic matter potentially available for methanogenic subsurface microbial communities. In this study the specific microbial community inside lignite-bearing sedimentary basin in Germany and its contribution to methanogenic hydrocarbon degradation processes was investigated. The stable isotope signature of methane measured in groundwater and coal-ric…	[Gruendger, Friederike; Jimenez, Nuria; Straaten, Nontje; Krueger, Martin] Fed Inst Geosci & Nat Resources, Geomicrobiol, Resource Geochem, D-30655 Hannover, Germany; [Thielemann, Thomas] Fed Inst Geosci & Nat Resources, D-30655 Hannover, Germany; [Lueders, Wilmann] Helmholtz Ctr Environm Hlth, Inst Groundwater Ecol, Neuherberg, Germany; [Richnow, Hans-Hermann] Helmholtz Ctr Environm Res, Dept Is…	Helmholtz Association; Helmholtz-Center Munich - German Research Center for Environmental Health; Helmholtz Association; Helmholtz Center for Environmental Research (UFZ)	Kruger, M (corresponding author), Fed Inst Geosci & Nat Resources, Geomicrobiol, Resource Geochem, Stilleweg 2, D-30655 Hannover, Germany.	martin.krueger@bgr.de	Richnow, Hans H./H-8523-2017; Lueders, Tillmann/B-1486-2013; Richnow, Hans/AAD-9016-2022; Jiménez, Núria/AAK-4582-2021	Richnow, Hans H./0000-0002-6144-4129; Lueders, Tillmann/0000-0002-9361-5009; Richnow, Hans/0000-0002-6144-4129; Jiménez, Núria/0000-0002-3737-1900; Grundger, Friederike Marie Luise/0000-0002-7386-3603	German Research Foundation (DEG) within the SP P1319 [KR3311 6-1, 6-2]; BGR	German Research Foundation (DEG) within the SP P1319(German Research Foundation (DFG)); BGR	This work was supported by funding from the German Research Foundation (DEG) within the SP P1319 (projects KR3311 6-1 and 6-2) and the BGR. We would like to thank Daniela Loch, Holger Probst, and Michaela Blank (all from the BGR) for collecting samples and for technical assistance. Katrin Hormann and Frederick von Netzer (Helmholtz Zentrum Munchen) are acknowledged for assistance in fingerprintin…		80	26	28	2	59	FRONTIERS MEDIA SA	LAUSANNE	PO BOX 110, EPFL INNOVATION PARK, BUILDING I, LAUSANNE, 1015, SWITZERLAND	1664-302X			FRONT MICROBIOL	Front. Microbiol.	MAR 20	2015	6
J	Hu, P; Tom, L; Singh, A; Thomas, BC; Baker, BJ; Piceno, YM; Andersen, GL; Banfield, JF				Hu, Ping; Tom, Lauren; Singh, Andrea; Thomas, Brian C.; Baker, Brett J.; Piceno, Yvette M.; Andersen, Gary L.; Banfield, Jillian F.			Genome-Resolved Metagenomic Analysis Reveals Roles for Candidate Phyla and Other Microbial Community Members in Biogeochemical Transformations in Oil Reservoirs	MBIO			English	Article							CRUDE-OIL; NORTH-SEA; DEEP SUBSURFACE; SP-NOV.; POLYSACCHARIDE HYDROLYSIS; ARCHAEOGLOBUS-FULGIDUS; GEN.-NOV.; WATER; FIELD; SEQUENCE	Oil reservoirs are major sites of methane production and carbon turnover, processes with significant impacts on energy resources and global biogeochemical cycles. We applied a cultivation-independent genomic approach to define microbial community membership and predict roles for specific organisms in biogeochemical transformations in Alaska North Slope oil fields. Produced water samples were coll…	[Hu, Ping; Tom, Lauren; Piceno, Yvette M.; Andersen, Gary L.] Univ Calif Berkeley, Lawrence Berkeley Natl Lab, Dept Ecol, Climate & Ecosyst Sci Div, Berkeley, CA 94720 USA; [Singh, Andrea; Thomas, Brian C.; Banfield, Jillian F.] Univ Calif Berkeley, Dept Earth & Planetary Sci, Berkeley, CA 94720 USA; [Baker, Brett J.] Univ Texas Austin, Inst Marine Sci, Dept Marine Sci, Port Aransas, TX 78712 USA	United States Department of Energy (DOE); Lawrence Berkeley National Laboratory; University of California System; University of California Berkeley; University of California System; University of California Berkeley; University of Texas System; University of Texas Austin	Banfield, JF (corresponding author), Univ Calif Berkeley, Dept Earth & Planetary Sci, Berkeley, CA 94720 USA.	jbanfield@berkeley.edu	Tom, Lauren/E-9739-2015; Andersen, Gary/G-2792-2015; Piceno, Yvette/I-6738-2016; Baker, Brett/P-1783-2014; Hu, Ping/G-2384-2015	Andersen, Gary/0000-0002-1618-9827; Piceno, Yvette/0000-0002-7915-4699; Baker, Brett/0000-0002-5971-1021; Banfield, Jill/0000-0001-8203-8771	University of California at Berkeley, Energy Biosciences Institute under U.S. Department of Energy [DE-AC02-05CH11231]; Department of Eenergy [DE-SC0004918]	University of California at Berkeley, Energy Biosciences Institute under U.S. Department of Energy; Department of Eenergy	This work was supported by a subcontract from the University of California at Berkeley, Energy Biosciences Institute to Lawrence Berkeley National Laboratory under its U.S. Department of Energy contract DE-AC02-05CH11231. The ggkbase is supported by grant DE-SC0004918 (Systems Biology Knowledge Base Focus Area) from Department of Eenergy.		85	90	95	4	51	AMER SOC MICROBIOLOGY	WASHINGTON	1752 N ST NW, WASHINGTON, DC 20036-2904 USA	2150-7511			MBIO	mBio	JAN-FEB	2016	7	1
J	Zheng, BW; Zhang, F; Chai, LJ; Yu, GM; Shu, FC; Wang, ZL; Su, SB; Xiang, TS; Zhang, ZZ; Hou, DJ; She, YH				Zheng, Beiwen; Zhang, Fan; Chai, Lujun; Yu, Gaoming; Shu, Fuchang; Wang, Zhengliang; Su, Sanbao; Xiang, Tingsheng; Zhang, Zhongzhi; Hou, DuJie; She, Yuehui			Permanent draft genome sequence of Geobacillus thermocatenulatus strain GS-1	MARINE GENOMICS			English	Article						Geobacillus thermocatenulatus; Thermophile; Hydrocarbon degradation; Genome	GENUS GEOBACILLUS; RNA GENES; THERMODENITRIFICANS; STEAROTHERMOPHILUS	Geobacillus thermocatenulatus strain GS-1 is a thermophilic bacillus having a growth optimum at 60 C, capable of degrading alkanes. It was isolated from the formation water of a high-temperature deep oil reservoir in Qinghai oilfield, China. Here, we report the draft genome sequence with an estimated assembly size of 3.5 Mb. A total of 3371 protein-coding sequences, including monooxygenase, alcoh…	[Zheng, Beiwen] Zhejiang Univ, State Key Lab Diag & Treatment Infect Dis, Hangzhou 310003, Zhejiang, Peoples R China; [Zhang, Fan; Chai, Lujun; Hou, DuJie] China Univ Geosci, Sch Energy Resources, Key Lab Marine Reservoir Evolut & Hydrocarbon Acc, Beijing, Peoples R China; [Yu, Gaoming] Yangtze Univ, Coll Petr Engn, Jinzhou, Peoples R China; [Shu, Fuchang; Wang, Zhengliang; Su, Sanbao; Xiang, Tin…	Zhejiang University; China University of Geosciences; Yangtze University; Yangtze University; China University of Petroleum	She, YH (corresponding author), Yangtze Univ, Coll Chem & Environm Engn, Jinzhou, Peoples R China.	sheyuehui@263.net	she, yuehui/HGA-7099-2022	Zhang, Fan/0000-0001-8668-0235	National Natural Science Foundation of China [81301461, 50974022, 51074029]; 863 Program of the Ministry of Science and Technology of the People's Republic of China [2008AA06Z204, 2013AA064402]; Zhejiang Provincial Natural Science Foundation of China [LQ13H190002]	National Natural Science Foundation of China(National Natural Science Foundation of China (NSFC)); 863 Program of the Ministry of Science and Technology of the People's Republic of China(National High Technology Research and Development Program of China); Zhejiang Provincial Natural Science Foundation of China(Natural Science Foundation of Zhejiang Province)	This study was sponsored by the National Natural Science Foundation of China (Grant Nos. 81301461, 50974022, and 51074029), 863 Program of the Ministry of Science and Technology of the People's Republic of China (Grant Nos. 2008AA06Z204 and 2013AA064402), and Zhejiang Provincial Natural Science Foundation of China (Grant No. LQ13H190002). The authors wish to thank the technical personnel in the o…		15	6	6	0	23	ELSEVIER SCIENCE BV	AMSTERDAM	PO BOX 211, 1000 AE AMSTERDAM, NETHERLANDS	1874-7787	1876-7478		MAR GENOM	Mar. Genom.	DEC	2014	18		B
J	Ji, JH; Zhou, L; Mbadinga, SM; Irfan, M; Liu, YF; Pan, P; Qi, ZZ; Chen, J; Liu, JF; Yang, SZ; Gu, JD; Mu, BZ				Ji, Jia-Heng; Zhou, Lei; Mbadinga, Serge Maurice; Irfan, Muhammad; Liu, Yi-Fan; Pan, Pan; Qi, Zhen-Zhen; Chen, Jing; Liu, Jin-Feng; Yang, Shi-Zhong; Gu, Ji-Dong; Mu, Bo-Zhong			Methanogenic biodegradation of C-9 to C(12)n-alkanes initiated by Smithella via fumarate addition mechanism	AMB EXPRESS			English	Article						Alkanes; Alkylsuccinates; Fumarate addition; Methanogenesis; Oil reservoirs	CRUDE-OIL BIODEGRADATION; CHAIN N-ALKANES; ANAEROBIC BIODEGRADATION; DENITRIFYING BACTERIUM; RIBOSOMAL-RNA; DEGRADATION; SUBSURFACE; METHANE; (1-METHYLPENTYL)SUCCINATE; HYDROCARBONS	In the present study, a methanogenic alkane-degrading (a mixture of C-9 to C(12)n-alkanes) culture enriched from production water of a low-temperature oil reservoir was established and assessed. Significant methane production was detected in the alkane-amended enrichment cultures compared with alkane-free controls over an incubation period of 1 year. At the end of the incubation, fumarate additio…	[Ji, Jia-Heng; Zhou, Lei; Mbadinga, Serge Maurice; Irfan, Muhammad; Liu, Yi-Fan; Pan, Pan; Qi, Zhen-Zhen; Chen, Jing; Liu, Jin-Feng; Yang, Shi-Zhong; Mu, Bo-Zhong] East China Univ Sci & Technol, State Key Lab Bioreactor Engn, 130 Meilong Rd, Shanghai 200237, Peoples R China; [Ji, Jia-Heng; Zhou, Lei; Mbadinga, Serge Maurice; Irfan, Muhammad; Liu, Yi-Fan; Pan, Pan; Qi, Zhen-Zhen; Chen, Jing; Liu, …	East China University of Science & Technology; East China University of Science & Technology; University of Engineering & Technology Lahore; University of Hong Kong; East China University of Science & Technology	Mu, BZ (corresponding author), East China Univ Sci & Technol, State Key Lab Bioreactor Engn, 130 Meilong Rd, Shanghai 200237, Peoples R China.; Mu, BZ (corresponding author), East China Univ Sci & Technol, Sch Chem & Mol Engn, 130 Meilong Rd, Shanghai 200237, Peoples R China.; Mu, BZ (corresponding author), East China Univ Sci & Technol, Engn Res Ctr Microbial Enhanced Oil Recovery, 130 Meilong R…	bzmu@ecust.edu.cn	Mu, Bo-Zhong/F-4704-2017; Gu, Ji-Dong/AAO-7851-2020; Mbadinga, Serge Maurice/I-3789-2017	Mu, Bo-Zhong/0000-0002-9564-4970;	National Natural Science Foundation of China [41530318, 41403066]; NSFC/RGC Joint Research Fund [41161160560]; Fundamental Research Funds for the Central Universities [222201817017, 50321101917017, 22221818014]; Research Program of State Key Laboratory of Bioreactor Engineering	National Natural Science Foundation of China(National Natural Science Foundation of China (NSFC)); NSFC/RGC Joint Research Fund; Fundamental Research Funds for the Central Universities(Fundamental Research Funds for the Central Universities); Research Program of State Key Laboratory of Bioreactor Engineering	This work was supported by the National Natural Science Foundation of China (Grants Nos. 41530318, 41403066), NSFC/RGC Joint Research Fund (No. 41161160560), the Fundamental Research Funds for the Central Universities (Nos. 222201817017, 50321101917017, 22221818014) and the Research Program of State Key Laboratory of Bioreactor Engineering.		48	15	15	4	22	SPRINGER	NEW YORK	ONE NEW YORK PLAZA, SUITE 4600, NEW YORK, NY, UNITED STATES	2191-0855			AMB EXPRESS	AMB Express	FEB 1	2020	10	1
C			Whitby, C; Skovhus, TL					Description of the Methods Used by Some of the Contributing Authors in This Book	APPLIED MICROBIOLOGY AND MOLECULAR BIOLOGY IN OILFIELD SYSTEMS			English	Proceedings Paper	International Symposium on Applied Microbiology and Molecular Biology in Oil Systems (ISMOS-2), 2009	JUN 17-19, 2009	Aarhus, DENMARK	Danish Technol UInst, Univ Essex, Aarhus Univ			16S RIBOSOMAL-RNA; HYDROCARBON DEGRADATION; PETROLEUM RESERVOIR; COMPUTER-PROGRAM; SEQUENCE DATA; OIL; BIOREMEDIATION; DIVERSITY; BACTERIA; SULFATE												44	0	0	0	0	SPRINGER-VERLAG BERLIN	BERLIN	HEIDELBERGER PLATZ 3, D-14197 BERLIN, GERMANY			978-90-481-9251-9				2011
J	Vigneron, A; Alsop, EB; Chambers, B; Lomans, BP; Head, IM; Tsesmetzis, N				Vigneron, Adrien; Alsop, Eric B.; Chambers, Brian; Lomans, Bartholomeus P.; Head, Ian M.; Tsesmetzis, Nicolas			Complementary Microorganisms in Highly Corrosive Biofilms from an Offshore Oil Production Facility	APPLIED AND ENVIRONMENTAL MICROBIOLOGY			English	Article							SULFATE-REDUCING BACTERIA; 16S RIBOSOMAL-RNA; NOV SP-NOV; PELOBACTER-CARBINOLICUS; MILD-STEEL; METHANOSARCINA-BARKERI; DESULFOVIBRIO-VULGARIS; METHANOGENIC BACTERIA; MICROBIAL CORROSION; METHANE FORMATION	Offshore oil production facilities are frequently victims of internal piping corrosion, potentially leading to human and environmental risks and significant economic losses. Microbially influenced corrosion (MIC) is believed to be an important factor in this major problem for the petroleum industry. However, knowledge of the microbial communities and metabolic processes leading to corrosion is st…	[Vigneron, Adrien; Head, Ian M.] Newcastle Univ, Sch Civil Engn & Geosci, Newcastle Upon Tyne NE1 7RU, Tyne & Wear, England; [Vigneron, Adrien; Alsop, Eric B.; Tsesmetzis, Nicolas] Shell Int Exploration & Prod Inc, Houston, TX USA; [Alsop, Eric B.] DOE Joint Genome Inst, Walnut Creek, CA USA; [Chambers, Brian] Shell Global Solutions US Inc, Houston, TX USA; [Lomans, Bartholomeus P.] Shell Global …	Newcastle University - UK; Royal Dutch Shell; United States Department of Energy (DOE); Royal Dutch Shell	Vigneron, A (corresponding author), Newcastle Univ, Sch Civil Engn & Geosci, Newcastle Upon Tyne NE1 7RU, Tyne & Wear, England.; Vigneron, A (corresponding author), Shell Int Exploration & Prod Inc, Houston, TX USA.	avignero@gmail.com		Tsesmetzis, Nicolas/0000-0001-5246-0568; Head, Ian/0000-0002-5373-162X; Vigneron, Adrien/0000-0003-3552-8369	Shell Global Solutions; Natural Environment Research Council [NE/J024325/1] Funding Source: researchfish; NERC [NE/J024325/1] Funding Source: UKRI	Shell Global Solutions; Natural Environment Research Council(UK Research & Innovation (UKRI)Natural Environment Research Council (NERC)); NERC(UK Research & Innovation (UKRI)Natural Environment Research Council (NERC))	Shell Global Solutions provided funding to Adrien Vigneron.		79	89	94	2	70	AMER SOC MICROBIOLOGY	WASHINGTON	1752 N ST NW, WASHINGTON, DC 20036-2904 USA	0099-2240	1098-5336		APPL ENVIRON MICROB	Appl. Environ. Microbiol.	APR	2016	82	8
J	Kamari, A; Arabloo, M; Shokrollahi, A; Gharagheizi, F; Mohammadi, AH				Kamari, Arash; Arabloo, Milad; Shokrollahi, Amin; Gharagheizi, Farhad; Mohammadi, Amir H.			Rapid method to estimate the minimum miscibility pressure (MMP) in live reservoir oil systems during CO2 flooding	FUEL			English	Article						Gene expression programming (GEP); Gene programming (GP); CO2-oil MMP; Error analysis; Empirical correlation	LOWER FLAMMABILITY LIMIT; NEURAL-NETWORK MODEL; GENETIC ALGORITHM; PVT PROPERTIES; PREDICTION; DISPLACEMENT; TEMPERATURE; IMPURE; WATER	Flooding fuel-generated CO2 into oil reservoirs will lead to two advantages in both enhanced oil recovery (EOR) and reduction in atmospheric emission of carbon dioxide. The main factor for determination of the possibilities to EOR by e.g. CO2 injection, in particular miscible case, into a specific oil reservoir is the CO2-oil minimum miscibility pressure (MMP). In this communication, we present t…	[Kamari, Arash; Gharagheizi, Farhad; Mohammadi, Amir H.] Univ KwaZulu Natal, Sch Engn, Thermodynam Res Unit, ZA-4041 Durban, South Africa; [Arabloo, Milad; Shokrollahi, Amin] Islamic Azad Univ, North Tehran Branch, Young Researchers & Elites Club, Tehran, Iran; [Gharagheizi, Farhad] Islamic Azad Univ, Dept Chem Engn, Buinzahra Branch, Buinzahra, Iran; [Mohammadi, Amir H.] IRGCP, Paris, France	University of Kwazulu Natal; Islamic Azad University; Islamic Azad University	Mohammadi, AH (corresponding author), IRGCP, Paris, France.	a.h.m@irgcp.fr	Gharagheizi, Farhad/U-6600-2019; Gharagheizi, Farhad/C-8542-2012; Arabloo, Milad/F-2878-2012; Shokrollahi, Amin/ABI-4767-2020	Gharagheizi, Farhad/0000-0003-3922-5867; Gharagheizi, Farhad/0000-0003-3922-5867; Shokrollahi, Amin/0000-0001-7938-7022; Arabloo, Milad/0000-0001-6752-2477					62	63	65	1	64	ELSEVIER SCI LTD	OXFORD	THE BOULEVARD, LANGFORD LANE, KIDLINGTON, OXFORD OX5 1GB, OXON, ENGLAND	0016-2361	1873-7153		FUEL	Fuel	AUG 1	2015	153
J	Nazina, TN; Shestakova, NM; Grigor'yan, AA; Mikhailova, EM; Tourova, TP; Poltaraus, AB; Feng, CX; Ni, FT; Belyaev, SS				Nazina, TN; Shestakova, NM; Grigor'yan, AA; Mikhailova, EM; Tourova, TP; Poltaraus, AB; Feng, CX; Ni, FT; Belyaev, SS			Phylogenetic diversity and activity of anaerobic microorganisms of high-temperature horizons of the Dagang oil field (P.R. China)	MICROBIOLOGY			English	Article						oil reservoir; thermophilic bacteria; sulfate reduction; methanogenesis; 16S rDNA; phylogeny; syntrophy; methanogenic community	MICROBIAL COMMUNITIES; PETROLEUM RESERVOIRS; BACTERIA; WATER; DNA	The number of microorganisms of major metabolic groups and the rates of sulfate reduction and methanogenesis processes in the formation waters of the high-temperature horizons of Dagang oil field have been determined. Using cultural methods, it was shown that the microbial community contained aerobic bacteria oxidizing crude oil, anaerobic fermentative bacteria, sulfate-reducing bacteria, and met…	Russian Acad Sci, Winogradsky Inst Microbiol, Moscow, Russia; Russian Acad Sci, VA Engelhardt Mol Biol Inst, Moscow, Russia; Dagang Oil Field Co, Res Ctr Dev Oil Prod Technol, Tianjin, Peoples R China	Research Center of Biotechnology RAS; Russian Academy of Sciences; Russian Academy of Sciences; Engelhardt Institute of Molecular Biology, RAS	Nazina, TN (corresponding author), Russian Acad Sci, Winogradsky Inst Microbiol, Moscow, Russia.	nazina@inmi.host.ru	Nazina, Tamara N/Q-2965-2016	Nazina, Tamara N/0000-0002-6586-2467; Semenova, Ekaterina/0000-0001-5299-7656; Grigoryan, Alexander/0000-0001-6092-4932					25	79	88	0	23	MAIK NAUKA/INTERPERIODICA	NEW YORK	C/O KLUWER ACADEMIC-PLENUM PUBLISHERS, 233 SPRING ST, NEW YORK, NY 10013-1578 USA	0026-2617			MICROBIOLOGY+	Microbiology	JAN-FEB	2006	75	1
J	Li, H; Chen, S; Mu, BZ; Gu, JD				Li, Hui; Chen, Shuo; Mu, Bo-Zhong; Gu, Ji-Dong			Molecular Detection of Anaerobic Ammonium-Oxidizing (Anammox) Bacteria in High-Temperature Petroleum Reservoirs	MICROBIAL ECOLOGY			English	Article							SULFATE-REDUCING BACTERIA; RIBOSOMAL-RNA GENE; IN-SITU DETECTION; MICROBIAL DIVERSITY; SOURING CONTROL; NITROGEN-CYCLE; FRESH-WATER; NITRATE; OXIDATION; QUANTIFICATION	Anaerobic ammonium-oxidizing (anammox) process plays an important role in the nitrogen cycle of the worldwide anoxic and mesophilic habitats. Recently, the existence and activity of anammox bacteria have been detected in some thermophilic environments, but their existence in the geothermal subterranean oil reservoirs is still not reported. This study investigated the abundance, distribution and f…	[Li, Hui; Gu, Ji-Dong] Univ Hong Kong, Sch Biol Sci, Hong Kong, Hong Kong, Peoples R China; [Li, Hui] E China Univ Sci & Technol, State Environm Protect Key Lab Environm Risk Asse, Shanghai 200237, Peoples R China; [Chen, Shuo; Mu, Bo-Zhong] E China Univ Sci & Technol, State Key Lab Biorcactor Engn, Shanghai 200237, Peoples R China; [Chen, Shuo; Mu, Bo-Zhong] E China Univ Sci & Technol, Inst Appl…	University of Hong Kong; East China University of Science & Technology; East China University of Science & Technology; East China University of Science & Technology; University of Hong Kong	Gu, JD (corresponding author), Univ Hong Kong, Sch Biol Sci, Pokfulam Rd, Hong Kong, Hong Kong, Peoples R China.	jdgu@hkucc.hku.hk	Hui, Li/B-4166-2009; Gu, Ji-Dong/AAF-2291-2019; Mu, Bo-Zhong/F-4704-2017; Gu, Ji-Dong/AAO-7851-2020	Hui, Li/0000-0002-7574-048X; Mu, Bo-Zhong/0000-0002-9564-4970;	Environmental Toxicology Education Fund; National Natural Science Foundation of China [50744016]; National High Technology Research and Development Program of China [2009AA063503]; China Postdoctoral Science Foundation [20080440082, 200902223]; Shanghai Municipal Science and Technology Commission [071607014]; Shanghai Postdoctoral Scientific Program [09R21411900]	Environmental Toxicology Education Fund; National Natural Science Foundation of China(National Natural Science Foundation of China (NSFC)); National High Technology Research and Development Program of China(National High Technology Research and Development Program of China); China Postdoctoral Science Foundation(China Postdoctoral Science Foundation); Shanghai Municipal Science and Technology Com…	This study was supported by Environmental Toxicology Education Fund (to J-D G), National Natural Science Foundation of China (50744016), National High Technology Research and Development Program of China (2009AA063503), China Postdoctoral Science Foundation funded project (20080440082, 200902223), Shanghai Municipal Science and Technology Commission (071607014), and Shanghai Postdoctoral Scientif…		64	107	127	10	122	SPRINGER	NEW YORK	ONE NEW YORK PLAZA, SUITE 4600, NEW YORK, NY, UNITED STATES	0095-3628	1432-184X		MICROB ECOL	Microb. Ecol.	NOV	2010	60	4
J	Rabus, R; Fukui, M; Wilkes, H; Widdel, F				Rabus, R; Fukui, M; Wilkes, H; Widdel, F			Degradative capacities and 16S rRNA-targeted whole-cell hybridization of sulfate-reducing bacteria in an anaerobic enrichment culture utilizing alkylbenzenes from crude oil	APPLIED AND ENVIRONMENTAL MICROBIOLOGY			English	Article							RIBOSOMAL-RNA; NUCLEOTIDE-SEQUENCE; OLIGONUCLEOTIDE PROBES; NORTH-SEA; GEN-NOV; PETROLEUM RESERVOIRS; FIELD WATERS; IDENTIFICATION; DESULFOVIBRIO; HYDROCARBONS	A mesophilic sulfate-reducing enrichment culture growing anaerobically on crude oil was used as a model system to study which nutritional types of sulfate-reducing bacteria may develop on original petroleum constituents in oil wells, tanks, and pipelines, Chemical analysis of oil hydrocarbons during growth revealed depletion of toluene and o-xylene within 1 month and of m-xylene, o-ethyltoluene, …	MAX PLANCK INST MARINE MIKROBIOL, D-28359 BREMEN, GERMANY; FORSCHUNGSZENTRUM JULICH, FORSCHUNGSZENTRUM, INST ERDOL & ORGAN GEOCHEM ICG4, D-52428 JULICH, GERMANY; NATL INST RESOURCES & ENVIRONM, TSUKUBA, IBARAKI 305, JAPAN	Max Planck Society; Helmholtz Association; Research Center Julich; National Institute of Advanced Industrial Science & Technology (AIST)			Fukui, Manabu/E-1323-2012						74	160	164	0	6	AMER SOC MICROBIOLOGY	WASHINGTON	1752 N ST NW, WASHINGTON, DC 20036-2904 USA	0099-2240	1098-5336		APPL ENVIRON MICROB	Appl. Environ. Microbiol.	OCT	1996	62	10
J	Miller, H; Trivedi, P; Qiu, YH; Sedlacko, EM; Higgins, CP; Borch, T				Miller, Hannah; Trivedi, Pankaj; Qiu, Yuheng; Sedlacko, Erin M.; Higgins, Christopher P.; Borch, Thomas			Food Crop Irrigation with Oilfield-Produced Water Suppresses Plant Immune Response	ENVIRONMENTAL SCIENCE & TECHNOLOGY LETTERS			English	Article							POLYCYCLIC AROMATIC-HYDROCARBONS; PATHOGENESIS-RELATED PROTEINS; WASTE-WATER; WHEAT; STRESS; GROWTH; GENES; REUSE; TOXICITY	Oil and gas extraction in the western United States generates significant volumes of produced water (PW) that is typically injected into deep disposal wells. Recently, crop irrigation has emerged as an attractive PW reuse option, but the impact on plant immune response is not known. In this study, we conducted a 3-month greenhouse pot study. Spring wheat (Triticum aestivum) was irrigated 3 times …	[Miller, Hannah; Qiu, Yuheng; Borch, Thomas] Colorado State Univ, Dept Soil & Crop Sci, Ft Collins, CO 80523 USA; [Trivedi, Pankaj] Colorado State Univ, Dept Bioagr Sci & Pest Management, Ft Collins, CO 80523 USA; [Sedlacko, Erin M.; Higgins, Christopher P.] Colorado Sch Mines, Dept Civil & Environm Engn, Golden, CO 80401 USA; [Borch, Thomas] Colorado State Univ, Dept Chem, Ft Collins, CO 80523 U…	Colorado State University; Colorado State University; Colorado School of Mines; Colorado State University	Borch, T (corresponding author), Colorado State Univ, Dept Soil & Crop Sci, Ft Collins, CO 80523 USA.; Borch, T (corresponding author), Colorado State Univ, Dept Chem, Ft Collins, CO 80523 USA.	thomas.borch@colostate.edu	Higgins, Christopher P/B-1836-2010; Trivedi, Pankaj/AAE-7135-2021; Borch, Thomas/A-2288-2008	Higgins, Christopher P/0000-0001-6220-8673; Borch, Thomas/0000-0002-4251-1613; Qiu, Yuheng/0000-0002-4701-6259	Environmental Defense Fund (EDF); ConocoPhillips Center for a Sustainable WE2ST (Water-Energy Education, Science and Technology) at the Colorado School of Mines (CSM)	Environmental Defense Fund (EDF); ConocoPhillips Center for a Sustainable WE2ST (Water-Energy Education, Science and Technology) at the Colorado School of Mines (CSM)	This study was sponsored, in part, by the Environmental Defense Fund (EDF). Furthermore, there was financial support from the ConocoPhillips Center for a Sustainable WE2ST (Water-Energy Education, Science and Technology) at the Colorado School of Mines (CSM) for E.M.S.'s salary. Also, the CSU Horticulture Center space was secured and paid for by Dr. Adam Heuberger of CSU, and Dr. Tzahi Cath of CS…		34	16	16	0	32	AMER CHEMICAL SOC	WASHINGTON	1155 16TH ST, NW, WASHINGTON, DC 20036 USA	2328-8930			ENVIRON SCI TECH LET	Environ. Sci. Technol. Lett.	NOV	2019	6	11
J	Wardlaw, GD; Arey, JS; Reddy, CM; Nelson, RK; Ventura, GT; Valentine, DL				Wardlaw, George D.; Arey, J. Samuel; Reddy, Christopher M.; Nelson, Robert K.; Ventura, G. Todd; Valentine, David L.			Disentangling oil weathering at a marine seep using GCxGC: Broad metabolic specificity accompanies subsurface petroleum biodegradation	ENVIRONMENTAL SCIENCE & TECHNOLOGY			English	Article							2-DIMENSIONAL GAS-CHROMATOGRAPHY; DEEP SUBSURFACE; CRUDE-OIL; HYDROCARBONS; RESERVOIRS; SEDIMENTS; CALIFORNIA; POINT; SPILL; ENVIRONMENT	Natural seeps contribute nearly half of the oil entering the coastal ocean. However, environmental fate studies generally monitor fewer than 5% of these petroleum compounds. Hence, the rates and relevance of physical, chemical, and biological weathering processes are unknown for the large majority of hydrocarbons, both released from natural seeps and also from human activities. To investigate the…	[Wardlaw, George D.; Valentine, David L.] Univ Calif Santa Barbara, Dept Earth Sci, Santa Barbara, CA 93106 USA; [Wardlaw, George D.; Valentine, David L.] Univ Calif Santa Barbara, Inst Marine Sci, Santa Barbara, CA 93106 USA; [Arey, J. Samuel] Swiss Fed Inst Technol, Environm Chem Modeling Lab, CH-1015 Lausanne, Switzerland; [Reddy, Christopher M.; Nelson, Robert K.; Ventura, G. Todd] Woods Hole…	University of California System; University of California Santa Barbara; University of California System; University of California Santa Barbara; Swiss Federal Institutes of Technology Domain; Ecole Polytechnique Federale de Lausanne; Woods Hole Oceanographic Institution	Valentine, DL (corresponding author), Univ Calif Santa Barbara, Dept Earth Sci, Santa Barbara, CA 93106 USA.	valentine@geol.ucsb.edu	Valentine, David/E-5594-2012	Reddy, Christopher/0000-0002-7814-2071; Arey, J. Samuel/0000-0002-3189-1585; Nelson, Robert/0000-0003-0534-5801; Valentine, David/0000-0001-5914-9107	U.S. National Science Foundation [OCE-0447395, IIS-0430835]; U.S. Minerals Management Service [85338]; California Toxic Substance Research and Training Program [19909]; U.S. Department of Energy [DE-FG02-06ER15775]	U.S. National Science Foundation(National Science Foundation (NSF)); U.S. Minerals Management Service; California Toxic Substance Research and Training Program; U.S. Department of Energy(United States Department of Energy (DOE))	We thank S. Horner and Venoco Inc. for providing access to reservoir samples. We also thank J. Boles for providing advice on the geologic structure of the COP field. We acknowledge support from the U.S. National Science Foundation (OCE-0447395 to D.L.V. and IIS-0430835 to C.M.R.), the U.S. Minerals Management Service (Task 85338 to D.L.V.), the California Toxic Substance Research and Training Pro…		31	61	61	1	39	AMER CHEMICAL SOC	WASHINGTON	1155 16TH ST, NW, WASHINGTON, DC 20036 USA	0013-936X			ENVIRON SCI TECHNOL	Environ. Sci. Technol.	OCT 1	2008	42	19
C	Li, YQ; Jing, GC		Liu, JJ; Zhang, H; Zhao, R		Li Yiqiang; Jing Guicheng			Mechanism and Pilot Test to Enhance Oil Recovery By Microbial Local Enrichment	2010 INTERNATIONAL SYMPOSIUM ON MULTI-FIELD COUPLING THEORY OF ROCK AND SOIL MEDIA AND ITS APPLICATIONS			English	Proceedings Paper	International Symposium on Multi-field Coupling Theory of Rock and Soil Media and Its Applications	OCT 10-11, 2010	Chengdu, PEOPLES R CHINA	Orient Acad Forum, Chinese Soc Rock Mech & Engn, Youth Working Comm, Chinese Soc Rock Mech & Engn, Profess Comm Ground Rock Engn, Chinese Soc Theoret & Appl Mech, Profess Grp Porous Flow, Hubei Soc Rock Mech & Engn, Profess Comm Porous Flow		crude oil consuming microorganisms; local enrichment; enhance oil recovery; viscous reservoir; oil displacement mechanism; pilot test	ESCHERICHIA-COLI; CHEMOTAXIS	Visualized experiments is applied to study mechanisms of crude oil consuming microorganisms to enhance oil recovery. It is discovered that they have the tendency to migrate directionally towards and eventually become closely contact with crude oil. This "local enrichment" phenomenon consequently results in a high concentration of microbes around crude oil and hence forms the foundation for enhanc…	[Li Yiqiang; Jing Guicheng] Petr Univ, Enhanced Oil Recovery Ctr, Beijing 100083, Peoples R China	China University of Petroleum	Li, YQ (corresponding author), Petr Univ, Enhanced Oil Recovery Ctr, Beijing 100083, Peoples R China.	lyq13504598848@163.com							10	0	0	0	3	ORIENT ACAD FORUM	MARRICKVILLE	PO BOX 893, MARRICKVILLE, NSW 2204, AUSTRALIA			978-0-9807687-2-5				2010
J	Li, SM; Pang, XQ; Liu, KY; Gao, XZ; Li, XG; Chen, ZY; Liu, BH				Li SuMei; Pang XiongQi; Liu KeYu; Gao XianZhi; Li XiaoGuang; Chen ZhenYan; Liu BaoHong			Formation mechanisms of heavy oils in the Liaohe Western Depression, Bohai Gulf Basin	SCIENCE IN CHINA SERIES D-EARTH SCIENCES			English	Article						heavy oil; Liaohe Western Depression; biodegradation; water washing; formation mechanism	BIODEGRADATION; FLUORESCENCE; RESERVOIR; CHINA	The Liaohe Oilfield in the Liaohe Western Depression of the Bohai Gulf Basin is the third-largest oil producing province and the largest heavy oil producing oilfield in China. A total of 65 oil samples, 35 rock samples and 36 reservoir sandstone samples were collected and analyzed utilizing conventional geochemical and biogeochemical approaches to unravel the mechanisms of the formation of the he…	[Li SuMei; Pang XiongQi; Gao XianZhi] China Univ Petr, State Key Lab Petr Resource & Prospecting, Beijing 102249, Peoples R China; [Li SuMei; Pang XiongQi; Gao XianZhi] China Univ Petr, Basin & Reservoir Res Ctr, Beijing 102249, Peoples R China; [Liu KeYu] CSIRO Petr, Bentley, WA 6102, Australia; [Li XiaoGuang; Chen ZhenYan; Liu BaoHong] PetroChina, Liaohe Oilfield Co Ltd, Panjin 124010, Peoples …	China University of Petroleum; China University of Petroleum; Commonwealth Scientific & Industrial Research Organisation (CSIRO); China National Petroleum Corporation	Li, SM (corresponding author), China Univ Petr, State Key Lab Petr Resource & Prospecting, Beijing 102249, Peoples R China.	smli8888@yahoo.com.cn	Liu, Keyu/F-9415-2012	Pang, Xiongqi/0000-0001-7232-9217	National Natural Science Foundation of China [40772077/D0206]	National Natural Science Foundation of China(National Natural Science Foundation of China (NSFC))	Supported by National Natural Science Foundation of China (Grant No. 40772077/D0206)		29	8	9	0	10	SCIENCE PRESS	BEIJING	16 DONGHUANGCHENGGEN NORTH ST, BEIJING 100717, PEOPLES R CHINA	1006-9313			SCI CHINA SER D	Sci. China Ser. D-Earth Sci.	OCT	2008	51
J	Zhao, RL; Wang, B; Li, DB; Chen, YM; Zhang, QS				Zhao, Ranlei; Wang, Bo; Li, Dongbo; Chen, Yiming; Zhang, Qiushi			Effect of sulfate-reducing bacteria from salt scale of water flooding pipeline on corrosion behavior of X80 steel	ENGINEERING FAILURE ANALYSIS			English	Article						CaCO3 ???????scale layer; Sulfate-reducing bacteria (SRB); Microbial corrosion; Combined effect; X80 steel pipeline	MICROBIOLOGICALLY INFLUENCED CORROSION; CARBON-STEEL; INJECTION; BIOFILM; CACO3; Q235; SOIL	As a means to enhance the recovery of oil reservoirs, waterflooding is widely employed in field development. However, because injected water contains solid impurities and incompatible characteristics, water injection pipelines often suffer from scaling and blocking. In addition, because these pipelines are typically buried in underground soil, microbial bacteria are derived from humid and oxygen-…	[Zhao, Ranlei; Wang, Bo; Zhang, Qiushi] Liaoning Shihua Univ, Fac Petr & Nat Gas Engn, Fushun 113001, Peoples R China; [Wang, Bo; Chen, Yiming; Zhang, Qiushi] Univ Regina, Dept Petr Syst Engn, Regina, SK S4S 0A2, Canada; [Li, Dongbo] Chinese Acad Sci, Inst Met Res, Shenyang 110016, Peoples R China; [Li, Dongbo] China Petr & Chem Corp, North China Nat Gas Sales Ctr, Nat Gas Branch, Tianjin 301703,…	Liaoning Petrochemical University; University of Regina; Chinese Academy of Sciences; Institute of Metal Research, CAS; Sinopec	Wang, B; Chen, YM (corresponding author), Univ Regina, Dept Petr Syst Engn, Regina, SK S4S 0A2, Canada.	WBG373@uregina.ca; ycj293@uregina.ca		Chen, Yiming/0000-0002-8121-3109	Education Department of Liaoning Province, China [L2020027]; Natural Science Foundation of Liaoning Province, China [2020-68]	Education Department of Liaoning Province, China; Natural Science Foundation of Liaoning Province, China(Natural Science Foundation of Liaoning Province)	Acknowledgements The authors would like to acknowledge the financial support from the Education Department of Liaoning Province, China (Grant No. L2020027) and the Natural Science Foundation of Liaoning Province, China (Grant No. 2020-68) . The authors also would like to thank all the reviewers who participated in the review, as well as MJ Editor ( www.mjeditor.com ) for providing English editing…		50	0	0	4	4	PERGAMON-ELSEVIER SCIENCE LTD	OXFORD	THE BOULEVARD, LANGFORD LANE, KIDLINGTON, OXFORD OX5 1GB, ENGLAND	1350-6307	1873-1961		ENG FAIL ANAL	Eng. Fail. Anal.	DEC	2022	142
J	Altunina, LK; Svarovskaya, LI; Gerelmaa, T				Altunina, L. K.; Svarovskaya, L. I.; Gerelmaa, T.			An integrated physicochemical and microbiological method for enhanced recovery of viscous oils from low temperature reservoirs of Mongolia	PETROLEUM CHEMISTRY			English	Article						viscous oils; reservoir microflora; biodegradation; hydrocarbons		Reservoir fluids from the Tamsagbulag oilfield (Mongolia) have been studied to develop an integrated physicochemical method for intensification of oil production and enhanced oil recovery using micro-organisms. The reservoir conditions of the oilfield facilitate the formation of a diverse biotic community represented by microorganisms of the Arthrobacter, Pseudomonas, Bacillus, Micrococcus, and F…	[Altunina, L. K.; Svarovskaya, L. I.] Russian Acad Sci, Inst Petr Chem, Siberian Branch, Tomsk, Russia; [Gerelmaa, T.] Mongolian Acad Sci, Inst Chem & Chem Technol, Ulaanbaatar, Mongolia	Institute of Petroleum Chemistry SB RAS; Russian Academy of Sciences; Mongolian Academy of Sciences	Altunina, LK (corresponding author), Russian Acad Sci, Inst Petr Chem, Siberian Branch, Tomsk, Russia.	sli@ipc.tsc.ru	Altunina, Lyubov K./J-1069-2014	Altunina, Lyubov K./0000-0001-9502-1864	Federal Program "The Scientific Research and Academic Personnel for Innovative Russia" [P 514]; basic research program of state academies of sciences [V 39.3.1]	Federal Program "The Scientific Research and Academic Personnel for Innovative Russia"; basic research program of state academies of sciences	The work was supported under the 2009-2013 Federal Program "The Scientific Research and Academic Personnel for Innovative Russia," State contract no. P 514, and the basic research program of state academies of sciences, project no. V 39.3.1.		13	0	2	0	7	MAIK NAUKA/INTERPERIODICA/SPRINGER	NEW YORK	233 SPRING ST, NEW YORK, NY 10013-1578 USA	0965-5441	1555-6239		PETROL CHEM+	Pet. Chem.	MAR	2013	53	2
J	Lavania, M; Cheema, S; Lal, B				Lavania, Meeta; Cheema, Simrita; Lal, Banwari			Potential of viscosity reducing thermophillic anaerobic bacterial consortium TERIB#90 in upgrading heavy oil	FUEL			English	Article						Viscosity reduction; Heavy crude oil; Moorella sp.; Core flooding tests; Formation fluid	IN-SITU BIOREMEDIATION; CRUDE-OIL; FT-IR; BIODEGRADATION; SLUDGE; BIOSURFACTANT; ASPHALTENE; REDUCTION; EMULSIONS; PROGRAMS	An anaerobic, thermophilic microbial viscosity reducing consortium TERIB# 90 was isolated from formation fluid of an oil reservoir located in India. It was able to reduce 98% viscosity of crude oil (665 to 10 cP) at 70 degrees C on the 30th day of incubation. Sequence analysis of the clones obtained from 16S rDNA clonal library showed affiliations with the genus Moorella sp. CF4 ranging from 94% …	[Lavania, Meeta; Lal, Banwari] Energy & Resources Inst TERI, Environm & Ind Biotechnol Div, New Delhi, India; [Cheema, Simrita] Swiss Fed Inst Technol, Dept Environm Syst Sci USYS, Inst Biogeochem & Pollutant Dynam IBP, Zurich, Switzerland	TERI University; Swiss Federal Institutes of Technology Domain; ETH Zurich	Lavania, M (corresponding author), Energy & Resources Inst TERI, Environm & Ind Biotechnol Div, New Delhi, India.	meetal@teri.res.in; banwaril@teri.res.in			Institute of Reservoir Studies, Oil and Natural Gas Corporation, India (ONGC) Ahmedabad	Institute of Reservoir Studies, Oil and Natural Gas Corporation, India (ONGC) Ahmedabad	We gratefully acknowledge the provision of the necessary facilities by Dr. R.K. Pachauri, Director General, TERI and financial support provided by Institute of Reservoir Studies, Oil and Natural Gas Corporation, India (ONGC) Ahmedabad. Pathogenicity of TERIB#90 was tested at National Toxicology Institute, Pune, India.		43	14	17	7	52	ELSEVIER SCI LTD	OXFORD	THE BOULEVARD, LANGFORD LANE, KIDLINGTON, OXFORD OX5 1GB, OXON, ENGLAND	0016-2361	1873-7153		FUEL	Fuel	MAR 15	2015	144
J	Fan, FQ; Zhang, BY; Morrill, PL; Husain, T				Fan, Fuqiang; Zhang, Baiyu; Morrill, Penny L.; Husain, Tahir			Profiling of Sulfate-Reducing Bacteria in an Offshore Oil Reservoir Using Phospholipid Fatty Acid (PLFA) Biomarkers	WATER AIR AND SOIL POLLUTION			English	Article						SRB; Produced water; Fatty acids; Redox potential; Biomass	MICROBIAL COMMUNITY STRUCTURE; RIBOSOMAL-RNA; BIOGEOCHEMICAL PROCESSES; LIPID BIOMARKERS; SP. NOV.; SOIL; DIVERSITY; FIELD; POPULATIONS; PETROLEUM	PLFA analysis was conducted to profile microorganisms and trace sulfate-reducing bacteria (SRB) in water samples from an offshore oil reservoir. From the results of spiked phospholipid standards, more than 90% of the phospholipids were recovered before the treatment of fatty acid methyl ester (FAME) derivatization while the relative standard deviations (RSD) were below 8.0%. The water samples fro…	[Fan, Fuqiang; Zhang, Baiyu; Husain, Tahir] Mem Univ Newfoundland, Northern Reg Persistent Organ Pollut Control NRPO, Fac Engn & Appl Sci, St John, NF A1B 3X5, Canada; [Morrill, Penny L.] Mem Univ Newfoundland, Earth Sci, Fac Sci, St John, NF A1B 3X5, Canada	Memorial University Newfoundland; Memorial University Newfoundland	Zhang, BY (corresponding author), Mem Univ Newfoundland, Northern Reg Persistent Organ Pollut Control NRPO, Fac Engn & Appl Sci, St John, NF A1B 3X5, Canada.	ff0466@mun.ca; bzhang@mun.ca; pmorrill@mun.ca; thusain@mun.ca		Zhang, Baiyu/0000-0002-6997-4765					64	3	3	6	25	SPRINGER INTERNATIONAL PUBLISHING AG	CHAM	GEWERBESTRASSE 11, CHAM, CH-6330, SWITZERLAND	0049-6979	1573-2932		WATER AIR SOIL POLL	Water Air Soil Pollut.	NOV	2017	228	11
J	Mahdaviara, M; Sharifi, M; Ahmadi, M				Mahdaviara, Mehdi; Sharifi, Mohammad; Ahmadi, Mohammad			Toward evaluation and screening of the enhanced oil recovery scenarios for low permeability reservoirs using statistical and machine learning techniques	FUEL			English	Article						Enhanced oil recovery (EOR); Analogous study; Low permeability reservoirs; EOR screening	TIGHT OIL; EXPERT-SYSTEM; EOR PROJECTS; TECHNOLOGIES; EXPLORATION; SHALE	The concurrence of the oil demand increment and running out of fossil fuels have brought about special attention toward the tight and low permeability reservoirs. The decision-making regarding the most appropriate EOR approach suiting these target zones is not straightforward and may be associated with more sophistication than the conventional high permeability alternatives. This fact justifies t…	[Mahdaviara, Mehdi; Sharifi, Mohammad; Ahmadi, Mohammad] Amirkabir Univ Technol, Tehran Polytech, Dept Petr Engn, Tehran, Iran	Amirkabir University of Technology	Sharifi, M (corresponding author), Amirkabir Univ Technol, Tehran Polytech, Dept Petr Engn, Tehran, Iran.	m_sharifi@aut.ac.ir	Ahmadi, Mohammad H/ABF-2759-2020; Sharifi, mohammad/N-5824-2018	Ahmadi, Mohammad H/0000-0002-0097-2534; Mahdaviara, Mehdi/0000-0001-7311-2351; Sharifi, mohammad/0000-0002-2623-4038					91	2	2	6	6	ELSEVIER SCI LTD	OXFORD	THE BOULEVARD, LANGFORD LANE, KIDLINGTON, OXFORD OX5 1GB, OXON, ENGLAND	0016-2361	1873-7153		FUEL	Fuel	OCT 1	2022	325
J	Wilkes, H; Boreham, C; Harms, G; Zengler, K; Rabus, R				Wilkes, H; Boreham, C; Harms, G; Zengler, K; Rabus, R			Anaerobic degradation and carbon isotopic fractionation of alkylbenzenes in crude oil by sulphate-reducing bacteria	ORGANIC GEOCHEMISTRY			English	Article						sulphate-reducing bacteria; anaerobic biodegradation; alkylbenzenes; crude oils; carbon isotopic fractionation; benzoic acids; metabolite formation	POLYCYCLIC AROMATIC-HYDROCARBONS; AZOARCUS-TOLULYTICUS TOL-4; CHAIN ORGANIC-ACIDS; NORTH-SEA; ANOXIC CONDITIONS; FIELD WATERS; GROUNDWATER ENVIRONMENT; TOLUENE MINERALIZATION; DENITRIFYING BACTERIA; PETROLEUM RESERVOIRS	A mesophilic enrichment culture of sulphate-reducing bacteria isolated from the water phase of a North Sea oil tank using oil from the same tank as sole source of carbon and energy specifically depletes certain CL-CS alkylbenzenes in crude oil during growth. The enrichment culture grows on oils of different origin and composition resulting in similar patterns of alkylbenzene depletion. Two pure c…	Forschungszentrum Julich, Inst Erdol & Organ Geochem, D-52425 Julich, Germany; Australian Geol Survey Org, Canberra, ACT, Australia; Max Planck Inst Marine Mikrobiol, D-28359 Bremen, Germany	Helmholtz Association; Research Center Julich; Geoscience Australia; Max Planck Society	Wilkes, H (corresponding author), Forschungszentrum Julich, Inst Erdol & Organ Geochem, Postfach 1913, D-52425 Julich, Germany.	h.wilkes@fz-juelich.de							72	85	92	0	17	PERGAMON-ELSEVIER SCIENCE LTD	OXFORD	THE BOULEVARD, LANGFORD LANE, KIDLINGTON, OXFORD OX5 1GB, ENGLAND	0146-6380			ORG GEOCHEM	Org. Geochem.		2000	31	1
J	Mirzaie, M; Tatar, A				Mirzaie, Mohsen; Tatar, Afshin			Modeling of interfacial tension in binary mixtures of CH4, CO2, and N-2(-) alkanes using gene expression programming and equation of state	JOURNAL OF MOLECULAR LIQUIDS			English	Article						Interfacial tension; Alkalies; EOR; Genetic expression programming (GEP); Equation of state (EoS)	EQUILIBRIUM PHASE COMPOSITIONS; MINIMUM MISCIBILITY PRESSURE; PLUS N-ALKANE; SURFACE-TENSION; CARBON-DIOXIDE; CORRESPONDING-STATES; GRADIENT THEORY; THERMODYNAMIC ANALYSIS; ELEVATED PRESSURES; OIL-RECOVERY	Interfacial tension (IFT) plays a key role in enhanced oil recovery (EOR) processes that involve the injection of light hydrocarbon and non-hydrocarbon gases into oil reservoirs. Crude oil is a complex mixture of different hydrocarbons, its phase behavior is unknown in presence of miscible gas under reservoir conditions: therefore, most of the LIT measurement experiments are done using a certain …	[Mirzaie, Mohsen] Islamic Azad Univ, South Tehran Branch, Tehran, Iran; [Tatar, Afshin] Islamic Azad Univ, North Tehran Branch, Young Researchers & Elite Club, Tehran, Iran	Islamic Azad University; Islamic Azad University	Tatar, A (corresponding author), Islamic Azad Univ, North Tehran Branch, Young Researchers & Elite Club, Tehran, Iran.	Afshin.tatar@gmail.com		Mirzaie, Mohsen/0000-0002-9217-5371					88	15	15	0	10	ELSEVIER	AMSTERDAM	RADARWEG 29a, 1043 NX AMSTERDAM, NETHERLANDS	0167-7322	1873-3166		J MOL LIQ	J. Mol. Liq.	DEC 15	2020	320		B
J	Kapse, NG; Paliwal, V; Dagar, SS; Rana, DP; Dhakephalkar, PK				Kapse, Neelam G.; Paliwal, Vasundhara; Dagar, Sumit Singh; Rana, Dolly Pal; Dhakephalkar, Prashant K.			Genomics and simulated laboratory studies reveal Thermococcus sp. 101C5 as a novel hyperthermophilic archaeon possessing a specialized metabolic arsenal for enhanced oil recovery	ANTONIE VAN LEEUWENHOEK INTERNATIONAL JOURNAL OF GENERAL AND MOLECULAR MICROBIOLOGY			English	Article						Genome; Hyperthermophile; Microbial enhanced oil recovery; Simulated reservoir conditions; Thermococcus	BIOSURFACTANT PRODUCTION; MOLECULAR-DETECTION; SEQUENCE; RESERVOIR; BACTERIA; MICROORGANISMS; WATER; NOV	Laboratory evaluation of hyperthermophiles with the potential for Enhanced Oil Recovery (EOR) is often hampered by the difficulties in replicating the in situ growth conditions in the laboratory. In the present investigation, genome analysis was used to gain insights into the metabolic potential of a hyperthermophile to mobilize the residual oil from depleting high-temperature oil reservoirs. Her…	[Kapse, Neelam G.; Paliwal, Vasundhara; Dagar, Sumit Singh; Dhakephalkar, Prashant K.] MACS Agharkar Res Inst, Bioenergy Grp, GG Agarkar Rd, Pune 411004, Maharashtra, India; [Kapse, Neelam G.; Dagar, Sumit Singh; Dhakephalkar, Prashant K.] Savitribai Phule Pune Univ, Ganeshkhind Rd, Pune 411007, Maharashtra, India; [Rana, Dolly Pal] Oil & Nat Gas Corp Ltd, Inst Reservoir Studies, Ahmadabad 380005…	Department of Science & Technology (India); Agharkar Research Institute (ARI); Savitribai Phule Pune University; Oil & Natural Gas Corporation	Dhakephalkar, PK (corresponding author), MACS Agharkar Res Inst, Bioenergy Grp, GG Agarkar Rd, Pune 411004, Maharashtra, India.	pkdhakephalkar@aripune.org	Dagar, Sumit Singh/Q-5775-2018	Dagar, Sumit Singh/0000-0003-2640-0793	Institute of Reservoir Studies, ONGC, Ahmedabad, India	Institute of Reservoir Studies, ONGC, Ahmedabad, India	The research was supported by Institute of Reservoir Studies, ONGC, Ahmedabad, India.		73	0	0	3	5	SPRINGER	DORDRECHT	VAN GODEWIJCKSTRAAT 30, 3311 GZ DORDRECHT, NETHERLANDS	0003-6072	1572-9699		ANTON LEEUW INT J G	Antonie Van Leeuwenhoek	JAN	2022	115	1
J	Rostami, A; Kamari, A; Panacharoensawad, E; Hashemi, A				Rostami, Alireza; Kamari, Arash; Panacharoensawad, Ekarit; Hashemi, Abdolnabi			New empirical correlations for determination of Minimum Miscibility Pressure (MMP) during N-2-contaminated lean gas flooding	JOURNAL OF THE TAIWAN INSTITUTE OF CHEMICAL ENGINEERS			English	Article						N-2 injection; Minimum Miscibility Pressure (MMP); Group Method of Data Handling (GMDH); Gene Expression Programming (GEP); Comprehensive error analysis; Sensitivity analysis	PROGRAMMING GP APPROACH; ENHANCED OIL-RECOVERY; RAPID METHOD; CRUDE-OIL; ACCURATE PROGNOSTICATION; INTERFACIAL-TENSION; GAS/VAPOR VISCOSITY; CO2 SOLUBILITY; TEMPERATURE; PREDICTION	In this study, two powerful intelligent algorithms called Group Method of Data Handling (GMDH) and Gene Expression Programming (GEP), are employed to calculate the MMP parameter during N-2-flooding. To this end, two mathematical equations with respect to reservoir temperature (T-R), molecular weight of heptane plus fraction (MWc7+), average critical temperature of injection gas (T-cm) volatile co…	[Rostami, Alireza; Hashemi, Abdolnabi] Petr Univ Technol, Dept Petr Engn, Ahvaz, Iran; [Kamari, Arash] Kansas State Univ, Dept Geol, 108 Thompson Hall, Manhattan, KS 66506 USA; [Kamari, Arash; Panacharoensawad, Ekarit] Texas Tech Univ, Bob L Herd Dept Petr Engn, Lubbock, TX 79409 USA	Kansas State University; Texas Tech University System; Texas Tech University	Rostami, A (corresponding author), Petr Univ Technol, Dept Petr Engn, Ahvaz, Iran.	alireza.rostami.put2014@gmail.com	Hashemi, Abdolnabi/AAC-3775-2019; Rostami, Alireza/AAH-9385-2020	Hashemi, Abdolnabi/0000-0001-5263-9568; Rostami, Alireza/0000-0002-0445-729X; Panacharoensawad, Ekarit/0000-0003-2556-3427					71	20	20	0	3	ELSEVIER	AMSTERDAM	RADARWEG 29, 1043 NX AMSTERDAM, NETHERLANDS	1876-1070	1876-1089		J TAIWAN INST CHEM E	J. Taiwan Inst. Chem. Eng.	OCT	2018	91
J	Zhong, M; Liu, BL; Zhang, LF; Wang, JT; Chen, J; Li, JY; Liu, YR; Ming, LT				Zhong, Ming; Liu, Baolei; Zhang, Lianfeng; Wang, Jiamngtao; Chen, Jun; Li, Jinyang; Liu, Yaru; Ming, Liting			Experimental Study on Microbial Induced Calcium Carbonate Precipitation to Enhance Reservoir Recovery	IRANIAN JOURNAL OF BIOTECHNOLOGY			English	Article						Environmental protection; Microorganism; MICP; Petroleum engineering	POROUS-MEDIA PERMEABILITY; SPOROSARCINA-PASTEURII; MICP; GROUNDWATER; REDUCTION; FIELD	Background: Bacillus subtilis can produce urease in the presence of urea as the main carbon source and induce mineralization in the presence of precipitable cations. Objectives: The objective of our study was to demonstrate that Bacillus subtilis catabolizes glucose first in the presence of both glucose and urea carbon sources. Using its feature of catabolizing glucose first to delay the minerali…	[Zhong, Ming; Liu, Baolei; Wang, Jiamngtao; Chen, Jun; Li, Jinyang; Liu, Yaru; Ming, Liting] Yangtze Univ, Minist Educ, Key Lab Explorat Technol Oil & Gas Resources, Wuhan 430100, Hubei, Peoples R China; [Liu, Baolei] Yangtze Univ, Dept Petr Engn, Leak Resistance & Sealing Technol Res Dept, Natl Engn Lab Petr Drilling Technol, Wuhan 430100, Hubei, Peoples R China; [Liu, Baolei] Key Lab Drilling &…	Yangtze University; Yangtze University; Sinopec	Liu, BL (corresponding author), Yangtze Univ, Minist Educ, Key Lab Explorat Technol Oil & Gas Resources, Wuhan 430100, Hubei, Peoples R China.	baoleiliu@yangtzeu.edu.cn		Zhong, Ming/0000-0002-8125-8518	Open Fund of Key Laboratory of Exploration Technologies for Oil and Gas Resources (Yangtze University), Ministry of Education [PI2021-06]; Educational Commission of Hubei Province of China [D20201302]; National Natural Science Foundation of china [52174019]	Open Fund of Key Laboratory of Exploration Technologies for Oil and Gas Resources (Yangtze University), Ministry of Education; Educational Commission of Hubei Province of China; National Natural Science Foundation of china(National Natural Science Foundation of China (NSFC))	Supported by Open Fund of Key Laboratory of Exploration Technologies for Oil and Gas Resources (Yangtze University), Ministry of Education, NO PI2021-06. Educational Commission of Hubei Province of China, D20201302 Supported by the National Natural Science Foundation of china, Grant No.52174019		35	1	1	6	12	NATL INST GENETIC ENGINEERING & BIOTECHNOLOGY	TEHRAN	PAJOOHESH BLVD, TEHRAN-KARAJ HWY, 17 KM, TEHRAN, IRAN	1728-3043			IRAN J BIOTECHNOL	Iran. J. Biotechnol.		2022	20	1
J	Grouzdev, DS; Bidzhieva, SK; Sokolova, DS; Tourova, TP; Poltaraus, AB; Nazina, TN				Grouzdev, Denis S.; Bidzhieva, Salimat K.; Sokolova, Diyana S.; Tourova, Tatiyana P.; Poltaraus, Andrey B.; Nazina, Tamara N.			Draft Genome Sequence of a Fermenting Bacterium, Soehngenia sp. Strain 1933P, Isolated from a Petroleum Reservoir in Azerbaijan	MICROBIOLOGY RESOURCE ANNOUNCEMENTS			English	Article							METHANE	The draft genome sequence of a mesophilic fermenting bacterium, Soehngenia sp. strain 1933P, isolated from production water of the Binagady petroleum reservoir (Republic of Azerbaijan), is presented. The genome is annotated for elucidation of the metabolic potential and taxonomic position of strain 1933P.	[Grouzdev, Denis S.] Russian Acad Sci, Inst Bioengn, Res Ctr Biotechnol, Moscow, Russia; [Bidzhieva, Salimat K.; Sokolova, Diyana S.; Tourova, Tatiyana P.; Nazina, Tamara N.] Russian Acad Sci, Winogradsky Inst Microbiol, Res Ctr Biotechnol, Moscow, Russia; [Poltaraus, Andrey B.] Russian Acad Sci, Engelhardt Inst Mol Biol, Moscow, Russia	Research Center of Biotechnology RAS; Russian Academy of Sciences; Research Center of Biotechnology RAS; Russian Academy of Sciences; Russian Academy of Sciences; Engelhardt Institute of Molecular Biology, RAS	Nazina, TN (corresponding author), Russian Acad Sci, Winogradsky Inst Microbiol, Res Ctr Biotechnol, Moscow, Russia.	nazina@inmi.ru	Sokolova, Diyana/P-6983-2018; Grouzdev, Denis/N-7650-2019; Bidzhieva, Salimat/AAG-8177-2021; Bidzhieva, Salimat Khasanovna/U-8249-2017; Nazina, Tamara N/Q-2965-2016	Grouzdev, Denis/0000-0002-1358-5146; Bidzhieva, Salimat/0000-0002-7599-114X; Bidzhieva, Salimat Khasanovna/0000-0002-7599-114X; Nazina, Tamara N/0000-0002-6586-2467; Sokolova, Diyana/0000-0003-2422-4423	Russian Science Foundation (RSF) [16-14-00028]; Ministry of Science and Higher Education of the Russian Federation; Russian Science Foundation [19-14-11010] Funding Source: Russian Science Foundation	Russian Science Foundation (RSF)(Russian Science Foundation (RSF)); Ministry of Science and Higher Education of the Russian Federation; Russian Science Foundation(Russian Science Foundation (RSF))	Work on genome sequencing was supported by the Russian Science Foundation (RSF) through grant 16-14-00028. Physiological and taxonomic studies of the strain were supported by the Ministry of Science and Higher Education of the Russian Federation.		16	3	3	1	4	AMER SOC MICROBIOLOGY	WASHINGTON	1752 N ST NW, WASHINGTON, DC 20036-2904 USA	2576-098X			MICROBIOL RESOUR ANN	Microbiol. Resour. Ann.	JUL	2019	8	29
J	Rostami, A; Arabloo, M; Kamari, A; Mohammadi, AH				Rostami, Alireza; Arabloo, Milad; Kamari, Arash; Mohammadi, Amir H.			Modeling of CO2 solubility in crude oil during carbon dioxide enhanced oil recovery using gene expression programming	FUEL			English	Article						Enhanced oil recovery (EOR); CO2 flooding; Gas solubility; Gene expression programming (GEP); Error analysis	MINIMUM MISCIBILITY PRESSURE; ARTIFICIAL NEURAL-NETWORK; RAPID METHOD; HEAVY OIL; PHASE-BEHAVIOR; GP APPROACH; PREDICTION; DISPLACEMENT; INJECTION; ALGORITHM	CO2 flooding into the petroleum reservoirs has gained much universal attentions owing to the benefits originated from the reduction of greenhouse gas emission and enhanced oil recovery (EOR). Among the all parameters applied for determining the feasibility of a particular CO2 EOR project especially in the miscible mode, solubility of CO2 has a vital function in the design and simulation of the CO…	[Rostami, Alireza] PUT, Dept Petr Engn, Ahvaz, Iran; [Arabloo, Milad] Islamic Azad Univ, Young Researchers & Elites Club, North Tehran Branch, Tehran, Iran; [Kamari, Arash] Kansas State Univ, Dept Geol, 108 Thompson Hall, Manhattan, KS 66506 USA; [Mohammadi, Amir H.] Univ KwaZulu Natal, Discipline Chem Engn, Sch Engn, Howard Coll Campus,King George V Ave, ZA-4041 Durban, South Africa; [Mohammadi,…	Islamic Azad University; Kansas State University; University of Kwazulu Natal	Arabloo, M; Mohammadi, AH (corresponding author), IRGCP, Paris, France.	alireza.rostami.put2014@gmail.com; milad.arabloo@gmail.com; a.h.m@irgcp.fr	Rostami, Alireza/AAH-9385-2020; Arabloo, Milad/F-2878-2012	Arabloo, Milad/0000-0001-6752-2477; Rostami, Alireza/0000-0002-0445-729X					81	46	46	2	54	ELSEVIER SCI LTD	OXFORD	THE BOULEVARD, LANGFORD LANE, KIDLINGTON, OXFORD OX5 1GB, OXON, ENGLAND	0016-2361	1873-7153		FUEL	Fuel	DEC 15	2017	210
J	Stemple, B; Gulliver, D; Tinker, K; Sarkar, P; Miller, J; Bibby, K				Stemple, Brooke; Gulliver, Djuna; Tinker, Kara; Sarkar, Preom; Miller, Josh; Bibby, Kyle			Evaluation of the Microbial Community and Geochemistry in Produced Waters Collected from CO2 EOR in the Niagaran Pinnacle Reef	ACS EARTH AND SPACE CHEMISTRY			English	Article						CO2 capture and storage; CO2 EOR; produced water microbiology; carbon sequestration; biogeochemistry; subsurface microbiome	HYDRAULIC FRACTURING FLUIDS; SALINE AQUIFERS; CARBON-DIOXIDE; GAS-WELLS; STORAGE; RESERVOIR; FIELD; MICROORGANISMS; DIVERSITY; BACTERIA	The injection of supercritical CO2 into depleted oil reservoirs for long-term storage will influence the subsurface biogeochemistry with important implications for future carbon storage sites. In this study, we characterized produced water collected from CO2 enhanced oil recovery (CO2 EOR) well separators in the Niagaran Pinnacle Reef, an oil-producing region in the Michigan Basin that is a propo…	[Stemple, Brooke; Bibby, Kyle] Univ Notre Dame, Dept Civil & Environm Engn & Earth Sci, Notre Dame, IN 46556 USA; [Stemple, Brooke; Sarkar, Preom; Miller, Josh] Oakridge Inst Sci & Educ, Oak Ridge, TN 37830 USA; [Gulliver, Djuna; Tinker, Kara; Sarkar, Preom; Miller, Josh] Natl Energy Technol Lab NETL, Pittsburgh, PA 15236 USA; [Tinker, Kara; Sarkar, Preom] NETL Support Contractor, Pittsburgh, PA …	University of Notre Dame	Bibby, K (corresponding author), Univ Notre Dame, Dept Civil & Environm Engn & Earth Sci, Notre Dame, IN 46556 USA.; Gulliver, D (corresponding author), Natl Energy Technol Lab NETL, Pittsburgh, PA 15236 USA.	djuna.gulliver@netl.doe.gov; kbibby@nd.edu	Bibby, Kyle/C-6189-2018	Bibby, Kyle/0000-0003-3142-6090					75	0	0	4	4	AMER CHEMICAL SOC	WASHINGTON	1155 16TH ST, NW, WASHINGTON, DC 20036 USA	2472-3452			ACS EARTH SPACE CHEM	ACS Earth Space Chem.	DEC 15	2022	6	12
J	Hernandez-Torres, J; Villamizar, GAC; Salgar-Chaparro, SJ; Silva-Plata, BA; Daza, ODS; Martinez-Perez, F; Umana, RM; Levy, M; Fuentes, JL				Hernandez-Torres, Jorge; Castillo Villamizar, Genis Andres; Salgar-Chaparro, Silvia Juliana; Andrea Silva-Plata, Bibiana; Serna Daza, Oriana Danuta; Martinez-Perez, Francisco; Mier Umana, Ricardo; Levy, Morris; Luis Fuentes, Jorge			Prokaryotic Community Characterization in a Mesothermic and Water-Flooded Oil Reservoir in Colombia	GEOMICROBIOLOGY JOURNAL			English	Article						petroleum biodegradation; subsurface microbiology; 16S rDNA gene	SULFATE-REDUCING BACTERIA; MICROBIAL DIVERSITY; DEEP SUBSURFACE; GEN.-NOV.; SYNTROPHIC ASSOCIATIONS; PERCHLORATE REDUCTION; PETROLEUM RESERVOIR; FIELD; BIODEGRADATION; IDENTIFICATION	The prokaryotic community at the "La Cira-Infantas" oil field, located in Colombia's Middle Magdalena Valley Basin, was characterized using 16S rRNA gene sequence analysis. This characterization is a first-step in assessing the dynamics of microbial degradation and defining strategies that may increase oil recovery and quality at the site. Two 16S rRNA gene libraries were generated from the total…	[Hernandez-Torres, Jorge; Salgar-Chaparro, Silvia Juliana; Andrea Silva-Plata, Bibiana; Serna Daza, Oriana Danuta] Univ Ind Santander, Escuela Biol, Fac Ciencias, Lab Biol Mol, Bucaramanga 680006, Colombia; [Castillo Villamizar, Genis Andres; Salgar-Chaparro, Silvia Juliana; Andrea Silva-Plata, Bibiana] Corp Invest Corros, Sede Invest UIS Guatiguara, Piedecuesta, Colombia; [Martinez-Perez, Franci…	Universidad Industrial de Santander; Universidad Industrial de Santander; Universidad Industrial de Santander; Purdue University System; Purdue University; Purdue University West Lafayette Campus	Fuentes, JL (corresponding author), Univ Ind Santander, Fac Ciencias, Escuela Biol, Lab Microbiol & Mutagenesis Ambiental, Bucaramanga 680006, Colombia.	jfuentes@uis.edu.co		Castillo Villamizar, Genis Andres/0000-0001-6730-6889; Salgar Chaparro, Silvia Juliana/0000-0002-7437-9725; Fuentes Lorenzo, Jorge Luis/0000-0001-8112-0554	Banco de la Republica (Bogota, Colombia); Universidad Industrial de Santander [VIE-UIS 8162]; COLCIENCIAS [RC-338-2005]	Banco de la Republica (Bogota, Colombia); Universidad Industrial de Santander; COLCIENCIAS(Departamento Administrativo de Ciencia, Tecnologia e Innovacion Colciencias)	This work was supported by the Banco de la Republica (Bogota, Colombia), the Vice-rectory for Science Research at Universidad Industrial de Santander (grant number VIE-UIS 8162) and by the COLCIENCIAS research contract RC-338-2005.		62	6	6	1	20	TAYLOR & FRANCIS INC	PHILADELPHIA	530 WALNUT STREET, STE 850, PHILADELPHIA, PA 19106 USA	0149-0451	1521-0529		GEOMICROBIOL J	Geomicrobiol. J.		2016	33	2
J	Grouzdev, DS; Semenova, EM; Sokolova, DS; Tourova, TP; Poltaraus, AB; Nazina, TN				Grouzdev, Denis S.; Semenova, Ekaterina M.; Sokolova, Diyana S.; Tourova, Tatiyana P.; Poltaraus, Andrey B.; Nazina, Tamara N.			Draft Genome Sequence of Geotoga petraea Strain HO-Geo1, Isolated from a Petroleum Reservoir in Russia	MICROBIOLOGY RESOURCE ANNOUNCEMENTS			English	Article								The draft genome sequence of Geotoga petraea strain HO-Geo1, a bacterium isolated from production water of the Vostochno-Anzirskoe petroleum reservoir in Russia, is presented. The genome of strain HO-Geo1 is annotated for elucidation of the metabolic potential and its possible function in the subsurface microbial community and biotechnological application.	[Grouzdev, Denis S.] Russian Acad Sci, Res Ctr Biotechnol, Inst Bioengn, Moscow, Russia; [Semenova, Ekaterina M.; Sokolova, Diyana S.; Tourova, Tatiyana P.; Nazina, Tamara N.] Russian Acad Sci, Res Ctr Biotechnol, Winogradsky Inst Microbiol, Moscow, Russia; [Poltaraus, Andrey B.] Russian Acad Sci, Engelhardt Inst Mol Biol, Moscow, Russia	Research Center of Biotechnology RAS; Russian Academy of Sciences; Research Center of Biotechnology RAS; Russian Academy of Sciences; Russian Academy of Sciences; Engelhardt Institute of Molecular Biology, RAS	Nazina, TN (corresponding author), Russian Acad Sci, Res Ctr Biotechnol, Winogradsky Inst Microbiol, Moscow, Russia.	nazina@inmi.ru	Sokolova, Diyana/P-6983-2018; Grouzdev, Denis/N-7650-2019; Nazina, Tamara N/Q-2965-2016; Semenova, Ekaterina M/Q-7978-2018	Grouzdev, Denis/0000-0002-1358-5146; Nazina, Tamara N/0000-0002-6586-2467; Semenova, Ekaterina/0000-0001-5299-7656; Sokolova, Diyana/0000-0003-2422-4423	Russian Science Foundation (RSF) [16-14-00028]; Ministry of Science and Higher Education of the Russian Federation; Russian Science Foundation [19-14-11010] Funding Source: Russian Science Foundation	Russian Science Foundation (RSF)(Russian Science Foundation (RSF)); Ministry of Science and Higher Education of the Russian Federation; Russian Science Foundation(Russian Science Foundation (RSF))	Work on genome sequencing of the strain was supported by the Russian Science Foundation (RSF) through grant 16-14-00028. Physiological and taxonomic studies of the strain were supported by the Ministry of Science and Higher Education of the Russian Federation. The funders had no role in the study design, data collection and interpretation, or the decision to submit the work for publication.		11	2	3	0	0	AMER SOC MICROBIOLOGY	WASHINGTON	1752 N ST NW, WASHINGTON, DC 20036-2904 USA	2576-098X			MICROBIOL RESOUR ANN	Microbiol. Resour. Ann.	JUL	2019	8	29
J	Piubeli, F; Grossman, MJ; Fantinatti-Garboggini, F; Durrant, LR				Piubeli, Francine; Grossman, Matthew J.; Fantinatti-Garboggini, Fabiana; Durrant, Lucia R.			Phylogenetic analysis of the microbial community in hypersaline petroleum produced water from the Campos Basin	ENVIRONMENTAL SCIENCE AND POLLUTION RESEARCH			English	Article						Hypersaline petroleum produced water; Microbial community structure; Carbon oxygen demand; Phenol; Methanogens; Marinobacter; Halomonas; Campos Basin	OIL-FIELD; DIVERSITY; MICROORGANISMS; DEGRADATION; SUBSEAFLOOR; REDUCTION; HALOMONAS	In this work the archaea and eubacteria community of a hypersaline produced water from the Campos Basin that had been transported and discharged to an onshore storage facility was evaluated by 16S recombinant RNA (rRNA) gene sequence analysis. The produced water had a hypersaline salt content of 10 (w/v), had a carbon oxygen demand (COD) of 4,300 mg/l and contains phenol and other aromatic compou…	[Piubeli, Francine; Grossman, Matthew J.; Durrant, Lucia R.] Univ Campinas UNICAMP, Food Engn Fac FEA, Dept Food Sci DCA, BR-13083862 Campinas, SP, Brazil; [Fantinatti-Garboggini, Fabiana] Univ Campinas UNICAMP, Chem Biol & Agr Pluridisciplinary Res Ctr CPQBA, BR-13081970 Campinas, SP, Brazil	Universidade Estadual de Campinas; Universidade Estadual de Campinas	Grossman, MJ (corresponding author), Univ Campinas UNICAMP, Food Engn Fac FEA, Dept Food Sci DCA, Rua Monteiro Lobato 80, BR-13083862 Campinas, SP, Brazil.	mjgrossman@biosagebiotech.com	Fantinatti-Garboggini, Fabiana/F-3991-2012; Durrant, Lucia Regina/AAA-3580-2019; Piubeli, Francine/H-1991-2015	Fantinatti-Garboggini, Fabiana/0000-0002-0096-047X; Piubeli, Francine/0000-0002-5065-5297; GROSSMAN, Lucia/0000-0002-0804-517X	Coordinator for the Improvement of Personnel in Higher Education (CAPES, Brazil); National Council for the Development of Science and Technology (CNPq); Foundation for the Support of Science in Sao Paulo State (FAPESP)	Coordinator for the Improvement of Personnel in Higher Education (CAPES, Brazil)(Coordenacao de Aperfeicoamento de Pessoal de Nivel Superior (CAPES)); National Council for the Development of Science and Technology (CNPq)(Conselho Nacional de Desenvolvimento Cientifico e Tecnologico (CNPQ)); Foundation for the Support of Science in Sao Paulo State (FAPESP)(Fundacao de Amparo a Pesquisa do Estado d…	We thank the Coordinator for the Improvement of Personnel in Higher Education (CAPES, Brazil), the National Council for the Development of Science and Technology (CNPq), and the Foundation for the Support of Science in Sao Paulo State (FAPESP) for financial support.		38	10	10	2	40	SPRINGER HEIDELBERG	HEIDELBERG	TIERGARTENSTRASSE 17, D-69121 HEIDELBERG, GERMANY	0944-1344	1614-7499		ENVIRON SCI POLLUT R	Environ. Sci. Pollut. Res.	OCT	2014	21	20
J	Uppuluri, P; Zaldivar, MA; Anderson, MZ; Dunn, MJ; Berman, J; Ribot, JLL; Kohler, JR				Uppuluri, Priya; Zaldivar, Maikel Acosta; Anderson, Matthew Z.; Dunn, Matthew J.; Berman, Judith; Ribot, Jose Luis Lopez; Kohler, Julia R.			Candida albicans Dispersed Cells Are Developmentally Distinct from Biofilm and Planktonic Cells	MBIO			English	Article						Candida albicans; RNA-seq; biofilms; carbon metabolism; dispersal; gene expression; planktonic	GENE-EXPRESSION; PESCADILLO HOMOLOG; MURINE MODEL; CYCLIC-AMP; YEAST; VIRULENCE; MORPHOGENESIS; RESISTANCE; REVEALS; PHASE	Candida albicans surface-attached biofilms such as those formed on intravenous catheters with direct access to the bloodstream often serve as a nidus for continuous release of cells capable of initiating new infectious foci. We previously reported that cells dispersed from a biofilm are yeast cells that originate from the top-most hyphal layers of the biofilm. Compared to their planktonic counter…	[Uppuluri, Priya] Univ Calif Los Angeles, Med Ctr, Los Angeles Biomed Res Inst Harbor, Div Infect Dis, Los Angeles, CA 90024 USA; [Zaldivar, Maikel Acosta; Kohler, Julia R.] Childrens Hosp, Div Infect Dis, Boston, MA 02115 USA; [Anderson, Matthew Z.; Dunn, Matthew J.] Ohio State Univ, Dept Microbiol, 484 W 12th Ave, Columbus, OH 43210 USA; [Berman, Judith] Tel Aviv Univ, Dept Mol Microbiol & Biot…	University of California System; University of California Los Angeles; University of California Los Angeles Medical Center; Harvard University; Boston Children's Hospital; University System of Ohio; Ohio State University; Tel Aviv University; University of Texas System; University of Texas at San Antonio (UTSA); University of Texas System; University of Texas at San Antonio (UTSA)	Uppuluri, P (corresponding author), Univ Calif Los Angeles, Med Ctr, Los Angeles Biomed Res Inst Harbor, Div Infect Dis, Los Angeles, CA 90024 USA.; Kohler, JR (corresponding author), Childrens Hosp, Div Infect Dis, Boston, MA 02115 USA.	puppuluri@labiomed.org; Julia.koehler@childrens.harvard.edu	Anderson, Matthew/R-4842-2019; Berman, Judith/AAS-5115-2021; Acosta-Zaldívar, Maikel/AAY-3832-2021; Berman, Judith/ABA-8528-2021; Lopez-Ribot, Jose L/D-2048-2010	Anderson, Matthew/0000-0003-1683-2170; Berman, Judith/0000-0002-8577-0084; Acosta-Zaldivar, Maikel/0000-0002-9562-6887; Lopez-Ribot, Jose/0000-0003-1992-3270	NATIONAL INSTITUTE OF ALLERGY AND INFECTIOUS DISEASES [R01AI095305, R21AI137716] Funding Source: NIH RePORTER; NIAID NIH HHS [R21 AI137716, R01 AI095305] Funding Source: Medline	NATIONAL INSTITUTE OF ALLERGY AND INFECTIOUS DISEASES(United States Department of Health & Human ServicesNational Institutes of Health (NIH) - USANIH National Institute of Allergy & Infectious Diseases (NIAID)); NIAID NIH HHS(United States Department of Health & Human ServicesNational Institutes of Health (NIH) - USANIH National Institute of Allergy & Infectious Diseases (NIAID))			58	43	45	1	9	AMER SOC MICROBIOLOGY	WASHINGTON	1752 N ST NW, WASHINGTON, DC 20036-2904 USA	2150-7511			MBIO	mBio	JUL-AUG	2018	9	4
J	Hemmati-Sarapardeh, A; Ahmadi, M; Ameli, F; Dabir, B; Mohammadi, AH; Husein, MM				Hemmati-Sarapardeh, Abdoihossein; Ahmadi, Mohammad; Ameli, Forough; Dabir, Bahram; Mohammadi, Amir H.; Husein, Maen M.			Modeling asphaltene precipitation during natural depletion of reservoirs and evaluating screening criteria for stability of crude oils	JOURNAL OF PETROLEUM SCIENCE AND ENGINEERING			English	Article						Asphaltene precipitation; Intelligent techniques; Stability; Screening criteria; Flory-Huggins model	ARTIFICIAL NEURAL-NETWORK; PREDICTION; DEPOSITION; FLOCCULATION; TEMPERATURE; SELECTION; PRESSURE; EQUATION; LIVE; COMPATIBILITY	Asphaltene precipitation and deposition can cause serious operational problems during oil production, transportation and processing. This mandates careful monitoring of crude oil stability by studying various thermodynamic and structural parameters contributing to crude oil instability. This study aimed at application of various optimized intelligent techniques to forecast the amount of asphalten…	[Hemmati-Sarapardeh, Abdoihossein] Shahid Bahonar Univ Kerman, Dept Petr Engn, Kerman, Iran; [Ahmadi, Mohammad; Dabir, Bahram] Amirkabir Univ Technol, Dept Petr Engn, Tehran, Iran; [Ameli, Forough] Iran Univ Sci & Technol, Sch Chem Engn, Tehran, Iran; [Dabir, Bahram] Amirkabir Univ Technol, Dept Chem Engn, Tehran, Iran; [Dabir, Bahram] Amirkabir Univ Technol, Energy Res Ctr, Tehran, Iran; [Mohamm…	Shahid Bahonar University of Kerman (SBUK); Amirkabir University of Technology; Iran University Science & Technology; Amirkabir University of Technology; Amirkabir University of Technology; University of Kwazulu Natal; University of Calgary	Hemmati-Sarapardeh, A (corresponding author), Shahid Bahonar Univ Kerman, Dept Petr Engn, Kerman, Iran.; Dabir, B (corresponding author), Amirkabir Univ Technol, Dept Petr Engn, Tehran, Iran.	aut.hemmati@gmail.com; drbdabir@aut.ac.ir	Bozorgian, Alireza/AAB-4702-2019; Sarapardeh, Abdolhossein Hemmati/M-5047-2019; Ameli, Forough/S-8917-2018	Bozorgian, Alireza/0000-0002-2454-5027; Sarapardeh, Abdolhossein Hemmati/0000-0002-5889-150X; Ameli, Forough/0000-0001-9474-303X; Ahmadi, Mohammad/0000-0002-9634-3926; Mohammadi, Amir H/0000-0002-2947-1135					109	10	10	0	13	ELSEVIER	AMSTERDAM	RADARWEG 29, 1043 NX AMSTERDAM, NETHERLANDS	0920-4105	1873-4715		J PETROL SCI ENG	J. Pet. Sci. Eng.	OCT	2019	181
J	Jones, AA; Pilloni, G; Claypool, JT; Paiva, AR; Summers, ZM				Jones, Aaron A.; Pilloni, Giovanni; Claypool, Joshua T.; Paiva, Antonio R.; Summers, Zarath M.			Evidence of sporulation capability of the ubiquitous oil reservoir microbe Halanaerobium congolense	GEOMICROBIOLOGY JOURNAL			English	Article						Sporulation; Halanaerobium; transcriptomics; subsurface; hydrocarbon reservoir microbiology	NATURAL-GAS WELLS; BACILLUS-SUBTILIS; GENE-EXPRESSION; CLOSTRIDIUM-DIFFICILE; BIOFILM FORMATION; MASTER REGULATOR; PROTEIN; SUBSURFACE; SPORES; DEEP	Subsurface lineages of microorganisms are often questioned for their autochthonous nature. We hypothesize that sporulation is critical to the delivery and ubiquity of Halanaerobium congolense in global subsurface hydrocarbon reservoirs, forming spores, or spore-like structures in order to survive surface conditions, and thriving in subsurface reservoir conditions. Genomic analysis of H. congolens…	[Jones, Aaron A.; Pilloni, Giovanni; Claypool, Joshua T.; Paiva, Antonio R.; Summers, Zarath M.] ExxonMobil Res & Engn Co, Corp Strateg Res, Annandale, NJ 08801 USA	Exxon Mobil Corporation	Summers, ZM (corresponding author), ExxonMobil Res & Engn Co, Corp Strateg Res, Annandale, NJ 08801 USA.	zarath.m.summers@exxonmobil.com		Pilloni, Giovanni/0000-0002-2125-0987					89	2	2	3	3	TAYLOR & FRANCIS INC	PHILADELPHIA	530 WALNUT STREET, STE 850, PHILADELPHIA, PA 19106 USA	0149-0451	1521-0529		GEOMICROBIOL J	Geomicrobiol. J.	APR 1	2021	38	4
J	Gao, PK; Gao, Y; Wang, HB; Ma, T; Gu, JD				Gao, Peike; Gao, Yu; Wang, Hongbo; Ma, Ting; Gu, Ji-Dong			An evaluation of different detection methods for anaerobic ammonium-oxidizing (anammox) bacteria inhabiting the oil reservoir systems	INTERNATIONAL BIODETERIORATION & BIODEGRADATION			English	Article						Oil reservoir; Nitrate reduction; Anaerobic ammonium-oxidizing (anammox); bacteria; Denitrifying bacteria (DNB); Dissimilatory nitrate reduction to ammonium (DNRA)	16S RIBOSOMAL-RNA; SULFATE-REDUCING BACTERIA; MOLECULAR-DETECTION; MICROBIAL COMMUNITIES; N-2 PRODUCTION; CRUDE-OIL; OXIDATION; DIVERSITY; WATER; GENE	Anaerobic ammonium-oxidizing (anammox) bacteria are widely detected in diverse anoxic niches, but only a few studies have reported their presence in oil reservoirs. Here, we collated published clone library data of the 16S rRNA and hzo genes of anammox bacteria and high-throughput sequencing data of the 16S rRNA genes from microbial communities to identify anammox bacteria inhabiting oil reservoi…	[Gao, Peike; Gao, Yu] Qufu Normal Univ, Coll Life Sci, Qufu 273165, Shandong, Peoples R China; [Wang, Hongbo] Petro China, Res Inst Expt Detect, Xinjiang Oilfield Co, Karamay 834000, Xinjiang, Peoples R China; [Ma, Ting] Nankai Univ, Coll Life Sci, Tianjin 300071, Peoples R China; [Gu, Ji-Dong] Guangdong Technion Israel Inst Technol, Environm Sci & Engn Res Grp, 241 Daxue Rd, Shantou 515063, Guan…	Qufu Normal University; China National Petroleum Corporation; PetroChina Company; Nankai University; Guangdong Technion Israel Institute of Technology; Guangdong Technion Israel Institute of Technology	Gao, PK (corresponding author), Qufu Normal Univ, Coll Life Sci, Qufu 273165, Shandong, Peoples R China.; Gu, JD (corresponding author), Guangdong Technion Israel Inst Technol, Environm Sci & Engn Res Grp, 241 Daxue Rd, Shantou 515063, Guangdong, Peoples R China.	gpkyll-001@163.com; jidong.gu@giit.edu.cn			Shandong Province Natural Science Foundation, China [ZR2020MC042]; Jining Key Research and Development Project, China [2019ZDGH019]; National Natural Science Foundation of China [31500414]	Shandong Province Natural Science Foundation, China(Natural Science Foundation of Shandong Province); Jining Key Research and Development Project, China; National Natural Science Foundation of China(National Natural Science Foundation of China (NSFC))	This work was funded by Shandong Province Natural Science Foundation, China (No.ZR2020MC042), Jining Key Research and Development Project, China (No.2019ZDGH019), and National Natural Science Foundation of China (No.31500414).		74	0	0	3	3	ELSEVIER SCI LTD	OXFORD	THE BOULEVARD, LANGFORD LANE, KIDLINGTON, OXFORD OX5 1GB, OXON, ENGLAND	0964-8305	1879-0208		INT BIODETER BIODEGR	Int. Biodeterior. Biodegrad.	FEB	2023	177
J	Bodtker, G; Thorstenson, T; Lillebo, BLP; Thorbjornsen, BE; Ulvoen, RH; Sunde, E; Torsvik, T				Bodtker, Gunhild; Thorstenson, Tore; Lillebo, Bente-Lise P.; Thorbjornsen, Bente E.; Ulvoen, Rikke Helen; Sunde, Egil; Torsvik, Terje			The effect of long-term nitrate treatment on SRB activity, corrosion rate and bacterial community composition in offshore water injection systems	JOURNAL OF INDUSTRIAL MICROBIOLOGY & BIOTECHNOLOGY			English	Article						Nitrate treatment; Nitrate-reducing bacteria; Sulphate-reducing bacteria; Biofilm community composition; Corrosion	GRADIENT GEL-ELECTROPHORESIS; SULFIDE-OXIDIZING BACTERIA; SULFATE-REDUCING BACTERIA; RESERVOIR MODEL COLUMN; 16S RIBOSOMAL-RNA; OIL-RESERVOIR; INHIBITION; SEQUENCES; BACTERIOPLANKTON; HYDROGENASE	Biogenic production of hydrogen sulphide (H(2)S) is a problem for the oil industry as it leads to corrosion and reservoir souring. Continuous injection of a low nitrate concentration (0.25-0.33 mM) replaced glutaraldehyde as corrosion and souring control at the Veslefrikk and Gullfaks oil field (North Sea) in 1999. The response to nitrate treatment was a rapid reduction in number and activity of …	[Bodtker, Gunhild] Unifob Petr, N-5020 Bergen, Norway; [Bodtker, Gunhild; Lillebo, Bente-Lise P.; Thorbjornsen, Bente E.; Ulvoen, Rikke Helen] Unifob Petr, N-5007 Bergen, Norway; [Thorstenson, Tore] StatoilHydro, N-5254 Bergen, Norway; [Sunde, Egil] StatoilHydro, N-4035 Stavanger, Norway; [Torsvik, Terje] CIPR, N-5007 Bergen, Norway	Equinor; Equinor; University of Bergen	Bodtker, G (corresponding author), Unifob Petr, Jahnebakken 5, N-5020 Bergen, Norway.	gunhild.bodtker@bio.uib.no							38	66	71	2	52	SPRINGER HEIDELBERG	HEIDELBERG	TIERGARTENSTRASSE 17, D-69121 HEIDELBERG, GERMANY	1367-5435			J IND MICROBIOL BIOT	J. Ind. Microbiol. Biotechnol.	DEC	2008	35	12
J	Gao, YC; Guo, SH; Wang, JN; Zhang, W; Chen, GH; Wang, H; Du, JH; Liu, YJ; Naidu, R				Gao, Yong-chao; Guo, Shu-hai; Wang, Jia-ning; Zhang, Wen; Chen, Guan-hong; Wang, Hui; Du, Jianhua; Liu, Yanju; Naidu, Ravi			Novel Bacillus cereus strain from electrokinetically remediated saline soil towards the remediation of crude oil	ENVIRONMENTAL SCIENCE AND POLLUTION RESEARCH			English	Article						Soil; Crude oil; Electrokinetic remediation; Whole-cell fatty acid methyl esters (FAMEs); Illumina sequencing center dot	ENHANCED BIOREMEDIATION; MICROBIAL-DEGRADATION; ORGANIC CONTAMINANTS; DNA HYBRIDIZATION; POLARITY-REVERSAL; BIODEGRADATION; COMMUNITY; IMPACT	A new strain SWH-15 was successfully isolated after initial electrokinetic remediation experiment using the same saline soil sampled from Shengli Oilfield, China. Four methods (morphological and biochemical characteristics, whole-cell fatty acid methyl esters (FAMEs) analysis, 16S rRNA sequence analysis and DNA G + C content and DNA-DNA hybridization analysis) were used to identify the taxonomic …	[Gao, Yong-chao; Guo, Shu-hai; Wang, Jia-ning; Zhang, Wen; Chen, Guan-hong] Qilu Univ Technol, Shandong Acad Sci, Ecol Inst, Shandong Prov Key Lab Appl Microbiol, 28789 East Jingshi Rd, Jinan 250103, Shandong, Peoples R China; [Gao, Yong-chao; Guo, Shu-hai] Chinese Acad Sci, Inst Appl Ecol, Shenyang 110164, Liaoning, Peoples R China; [Wang, Hui] Univ Jinan, Sch Resources & Environm, Jinan 250022,…	Qilu University of Technology; Chinese Academy of Sciences; Shenyang Institute of Applied Ecology, CAS; University of Jinan; University of Newcastle	Guo, SH (corresponding author), Qilu Univ Technol, Shandong Acad Sci, Ecol Inst, Shandong Prov Key Lab Appl Microbiol, 28789 East Jingshi Rd, Jinan 250103, Shandong, Peoples R China.; Guo, SH (corresponding author), Chinese Acad Sci, Inst Appl Ecol, Shenyang 110164, Liaoning, Peoples R China.	shuhaiguo@iae.ac.cn	Liu, Yanju/AAR-2505-2020	Liu, Yanju/0000-0002-1495-7837; Naidu, Ravi/0000-0002-1520-2495	Key Research and Development Plan of Shandong Province [2017GSF17118, 2017GSF217005]; National Natural Science Foundation of China [41601331]; Taishan Scholars Project (2015)	Key Research and Development Plan of Shandong Province; National Natural Science Foundation of China(National Natural Science Foundation of China (NSFC)); Taishan Scholars Project (2015)	This work was funded by the Key Research and Development Plan of Shandong Province (No. 2017GSF17118; No. 2017GSF217005), the National Natural Science Foundation of China (No. 41601331), and Taishan Scholars Project (2015).		49	3	3	1	49	SPRINGER HEIDELBERG	HEIDELBERG	TIERGARTENSTRASSE 17, D-69121 HEIDELBERG, GERMANY	0944-1344	1614-7499		ENVIRON SCI POLLUT R	Environ. Sci. Pollut. Res.	SEP	2018	25	26
J	Kogler, F; Dopffel, N; Mahler, E; Hartmann, FSF; Schulze-Makuch, D; Visser, F; Frommherz, B; Herold, A; Alkan, H				Koegler, Felix; Dopffel, Nicole; Mahler, Eva; Hartmann, Fabian S. F.; Schulze-Makuch, Dirk; Visser, Foppe; Frommherz, Bernd; Herold, Andrea; Alkan, Hakan			Influence of surface mineralogy on the activity of Halanaerobium sp. during microbial enhanced oil recovery (MEOR)	FUEL			English	Article						Microbial enhanced oil recovery; Carbonate dissolution; Dynamic experiment; Reservoir microbiology; Halanaerobium; High salinity		Microbial enhanced oil recovery (MEOR) is an economically attractive tertiary recovery technique and fermentative bacteria are frequently suggested for MEOR, partly because microbially produced organic acids have the potential for rock matrix dissolution. In this study, the metabolic activity and the community shift of a diverse microbiome of a high-salinity oilfield upon supplying MEOR nutrients…	[Koegler, Felix; Visser, Foppe; Frommherz, Bernd; Alkan, Hakan] Wintershall Dea GmbH, D-34119 Kassel, Germany; [Dopffel, Nicole] Norwegian Res Ctr NORCE, N-5008 Bergen, Norway; [Mahler, Eva; Herold, Andrea] BASF SE, D-67056 Ludwigshafen, Germany; [Hartmann, Fabian S. F.] Tech Univ Denmark, Dept Biotechnol & Biomed, DK-2800 Lyngby, Denmark; [Schulze-Makuch, Dirk] Tech Univ Berlin, Ctr Astron & Ast…	Norwegian Research Centre (NORCE); BASF; Technical University of Denmark; Technical University of Berlin; Helmholtz Association; Helmholtz-Center Potsdam GFZ German Research Center for Geosciences; Leibniz Institut fur Gewasserokologie und Binnenfischerei (IGB)	Kogler, F (corresponding author), 1A Douro Pl, London W85PH, England.	felix.koegler@rws.com	Alkan, Hakan/ACY-1599-2022; Kögler, Felix/AAO-6335-2021	Kögler, Felix/0000-0003-0060-3891; Alkan, Hakan/0000-0003-1358-5813; Hartmann, Fabian Stefan Franz/0000-0001-5394-1865	Wintershall Dea	Wintershall Dea	We appreciate the funding and permission of Wintershall Dea to conductand publish this project. The authors would like to thank Sabrina Reimann and Sabine Schatzmann and their respective colleagues from Wintershall Dea in Barnstorf for supplying reservoir rock und fluid samples. Special thanks go to for providing reservoir fluids. Philipp Aurin is thankfully mentioned for the XRD and XRF analysis…		51	8	8	5	23	ELSEVIER SCI LTD	OXFORD	THE BOULEVARD, LANGFORD LANE, KIDLINGTON, OXFORD OX5 1GB, OXON, ENGLAND	0016-2361	1873-7153		FUEL	Fuel	APR 15	2021	290
J	BRINK, DE; VANCE, I; WHITE, DC				BRINK, DE; VANCE, I; WHITE, DC			DETECTION OF DESULFOBACTER IN OIL-FIELD ENVIRONMENTS BY NONRADIOACTIVE DNA PROBES	APPLIED MICROBIOLOGY AND BIOTECHNOLOGY			English	Article							SULFATE-REDUCING BACTERIA; FATTY-ACID BIOMARKERS; ANAEROBIC BIOCORROSION; GEN-NOV; ACETATE; HYDROGENASE; POPULATIONS; BIOFILMS; REDUCERS; WATERS	Acetate-utilizing, sulfate-reducing bacteria of the genus Desulfobacter were enriched from an oilfield seawater-injection system. These bacteria were detected in enrichment culture and verified as Desulfobacter by an oligonucleotide DNA probe that targets a Desulfobacter-specific sequence of ribosomal RNA. These Desulfobacter produced extensive biofilm in culture and exhibited high levels of hydr…	BP AMER INC,WARRENSVILLE RES CTR,CLEVELAND,OH 44128; UNIV TENNESSEE,CTR ENVIRONM BIOTECHNOL,KNOXVILLE,TN 37932	BP; University of Tennessee System; University of Tennessee Knoxville									28	16	16	1	6	SPRINGER VERLAG	NEW YORK	175 FIFTH AVE, NEW YORK, NY 10010	0175-7598			APPL MICROBIOL BIOT	Appl. Microbiol. Biotechnol.	NOV	1994	42	2-3
J	Su, ZY; Wang, SJ; Yang, SC; Yin, YJ; Cao, YK; Li, GQ; Ma, T				Su, Zhaoying; Wang, Shaojing; Yang, Shicheng; Yin, Yujun; Cao, Yunke; Li, Guoqiang; Ma, Ting			Genetic and Comparative Genome Analysis of Exiguobacterium aurantiacum SW-20, a Petroleum-Degrading Bacteria with Salt Tolerance and Heavy Metal-Tolerance Isolated from Produced Water of Changqing Oilfield, China	MICROORGANISMS			English	Article						E; aurantiacum SW-20; comparative genomics; alkane degradation; heavy metal tolerance; salt-tolerance	NA+/H+ ANTIPORTER GENE; SP-NOV.; DIFFERENTIAL EXPRESSION; PSYCHROPHILIC BACTERIUM; STRESS; CYTOCHROME-P450; SEQUENCE; ACCUMULATION; TREHALOSE; CLONING	The genome of Exiguobacterium aurantiacum SW-20 (E. aurantiacum SW-20), a salt-tolerant microorganism with petroleum hydrocarbon-degrading ability isolated from the Changqing Oilfield, was sequenced and analyzed. Genomic data mining even comparative transcriptomics revealed that some genes existed in SW-20 might be related to the salt tolerance. Besides, genes related to petroleum hydrocarbon deg…	[Su, Zhaoying; Wang, Shaojing; Yang, Shicheng; Yin, Yujun; Cao, Yunke; Li, Guoqiang; Ma, Ting] Nankai Univ, Coll Life Sci, Key Lab Mol Microbiol & Technol, Minist Educ, Tianjin 300071, Peoples R China	Nankai University	Ma, T (corresponding author), Nankai Univ, Coll Life Sci, Key Lab Mol Microbiol & Technol, Minist Educ, Tianjin 300071, Peoples R China.	suejoing@163.com; 1120200495@mail.nankai.edu.cn; 2120201130@mail.nankai.edu.cn; yujun_yin@163.com; 2120201145@mail.nankai.edu.cn; gqli@nankai.edu.cn; tingma@nankai.edu.cn			National Key Research and Development Project of China [2018YFA0902101]; National Natural Science Foundation of China [91851107, 41773080]	National Key Research and Development Project of China; National Natural Science Foundation of China(National Natural Science Foundation of China (NSFC))	This work was supported by the National Key Research and Development Project of China (2018YFA0902101) and the National Natural Science Foundation of China (91851107, 41773080).		67	2	2	13	22	MDPI	BASEL	ST ALBAN-ANLAGE 66, CH-4052 BASEL, SWITZERLAND		2076-2607		MICROORGANISMS	Microorganisms	JAN	2022	10	1
J	Jimenez, N; Richnow, HH; Vogt, C; Treude, T; Kruger, M				Jimenez, Nria; Richnow, Hans H.; Vogt, Carsten; Treude, Tina; Krueger, Martin			Methanogenic Hydrocarbon Degradation: Evidence from Field and Laboratory Studies	JOURNAL OF MOLECULAR MICROBIOLOGY AND BIOTECHNOLOGY			English	Review						Hydrocarbons; Coal; Oil; Fermentation; Methanogenesis; Methane production rate	OIL SANDS TAILINGS; INTERSPECIES ELECTRON-TRANSFER; MICROBIAL METHANE FORMATION; SULFATE-REDUCING BACTERIUM; NATURAL-GAS FIELD; CHAIN N-ALKANES; CRUDE-OIL; HIGH-TEMPERATURE; MOLECULAR CHARACTERIZATION; COALBED METHANE	Microbial transformation of hydrocarbons to methane is an environmentally relevant process taking place in a wide variety of electron acceptor-depleted habitats, from oil reservoirs and coal deposits to contaminated groundwater and deep sediments. Methanogenic hydrocarbon degradation is considered to be a major process in reservoir degradation and one of the main processes responsible for the for…	[Jimenez, Nria; Krueger, Martin] BGR Fed Inst Geosci & Nat Resources, Dept Resource Geochem, Stilleweg 2, DE-30655 Hannover, Germany; [Richnow, Hans H.; Vogt, Carsten] UFZ Helmholtz Ctr Environm Res, Dept Isotope Biogeochem, Leipzig, Germany; [Treude, Tina] Univ Calif Los Angeles, Dept Earth Planetary & Space Sci, Los Angeles, CA USA; [Treude, Tina] Univ Calif Los Angeles, Atmospher & Ocean Sci, …	Helmholtz Association; Helmholtz Center for Environmental Research (UFZ); University of California System; University of California Los Angeles; University of California System; University of California Los Angeles	Kruger, M (corresponding author), BGR Fed Inst Geosci & Nat Resources, Dept Resource Geochem, Stilleweg 2, DE-30655 Hannover, Germany.	Martin.Krueger@bgr.de	Treude, Tina/AAD-5817-2020; Richnow, Hans H./H-8523-2017; Richnow, Hans/AAD-9016-2022; Jiménez, Núria/AAK-4582-2021	Richnow, Hans H./0000-0002-6144-4129; Richnow, Hans/0000-0002-6144-4129; Jiménez, Núria/0000-0002-3737-1900; Treude, Tina/0000-0001-6366-286X	German Research Foundation (DFG) [SPP1319, KR3311 6-1/6-2, RI903 4-1/4-2, TR867/3-1]	German Research Foundation (DFG)(German Research Foundation (DFG))	This work was supported by funding from the German Research Foundation (DFG) within the SPP1319 (projects KR3311 6-1/6-2; RI903 4-1/4-2 and TR867/3-1). We would like to thank the staff of the Department of Isotope Biogeochemistry at the UFZ and the Geomicrobiology group at the BGR.		160	35	37	2	98	KARGER	BASEL	ALLSCHWILERSTRASSE 10, CH-4009 BASEL, SWITZERLAND	1464-1801	1660-2412		J MOL MICROB BIOTECH	J. Mol. Microbiol. Biotechnol.		2016	26	1-3
J	Yang, JJ; Li, GH; Qian, Y; Zhang, F				Yang, Juejie; Li, Guanghe; Qian, Yi; Zhang, Fang			Increased soil methane emissions and methanogenesis in oil contaminated areas	LAND DEGRADATION & DEVELOPMENT			English	Article						Illumina MiSeq sequencing; methane; methanogenesis; soil oil contamination; stable carbon isotopes	16S RIBOSOMAL-RNA; CARBON; DIVERSITY; MCRA; BIODEGRADATION; BIOREMEDIATION; FRACTIONATION; RESPIRATION; COMMUNITIES; OXIDATION	Crude oil exploration and related activities cause severe soil contamination and land degradation. However, how soil CH4 and CO2 fluxes respond to oil contamination is poorly understood. To address this question, we conducted in situ investigation of CH4 and CO2 emissions in the Shengli Oilfield, China. CH4 emissions from contaminated soils were 60-1,800 mu g.m(-2).hr(-1), much higher than those …	[Zhang, Fang] Tsinghua Univ, Sch Environm, Beijing 100084, Peoples R China; [Zhang, Fang] Tsinghua Univ, State Key Joint Lab Environm Simulat & Pollut Con, Beijing 100084, Peoples R China	Tsinghua University; Tsinghua University	Zhang, F (corresponding author), Tsinghua Univ, Sch Environm, Beijing 100084, Peoples R China.; Zhang, F (corresponding author), Tsinghua Univ, State Key Joint Lab Environm Simulat & Pollut Con, Beijing 100084, Peoples R China.	fangzhang@tsinghua.edu.cn	Zhang, Fang/H-3019-2012	Zhang, Fang/0000-0002-0480-7501	National Natural Science Foundation of China [41672238]; Thousand Talents Plan for Young Professionals; Young Elite Scientist Sponsorship Program by CAST [2015QNRC001]; Environmental Public Welfare Scientific Research Project [201309001]	National Natural Science Foundation of China(National Natural Science Foundation of China (NSFC)); Thousand Talents Plan for Young Professionals; Young Elite Scientist Sponsorship Program by CAST; Environmental Public Welfare Scientific Research Project	National Natural Science Foundation of China, Grant/Award Number: 41672238; Thousand Talents Plan for Young Professionals; Young Elite Scientist Sponsorship Program by CAST, Grant/Award Number: 2015QNRC001; Environmental Public Welfare Scientific Research Project, Grant/Award Number: 201309001		49	10	10	2	56	WILEY	HOBOKEN	111 RIVER ST, HOBOKEN 07030-5774, NJ USA	1085-3278	1099-145X		LAND DEGRAD DEV	Land Degrad. Dev.	MAR	2018	29	3
J	Yang, T; Mbadinga, SM; Zhou, L; Yang, SZ; Liu, JF; Gu, JD; Mu, BZ				Yang, Tao; Mbadinga, Serge Maurice; Zhou, Lei; Yang, Shi-Zhong; Liu, Jing-Feng; Gu, Ji-Dong; Mu, Bo-Zhong			Propionate metabolism and diversity of relevant functional genes by in silico analysis and detection in subsurface petroleum reservoirs	WORLD JOURNAL OF MICROBIOLOGY & BIOTECHNOLOGY			English	Article						Fermentation; In silico analysis; mmdA gene; Propionate formation; Petroleum reservoir	COMPLETE GENOME SEQUENCE; ALIPHATIC ACID ANIONS; GREAT ARTESIAN BASIN; SP-NOV.; ANAEROBIC BACTERIUM; ORGANIC-ACIDS; OIL; WATERS; DEHYDROGENASE; DEGRADATION	Propionate is a common metabolic intermediate occurring in environmental samples including petroleum reservoirs. Available microbial genomes were obtained from the NCBI database and analyzed in silico by hmmscan to check three metabolic pathways of propionate production in petroleum reservoir systems. The succinate pathway was the dominant one while the other two (lactate and 1,2-propanediol path…	[Yang, Tao; Mbadinga, Serge Maurice; Zhou, Lei; Yang, Shi-Zhong; Liu, Jing-Feng; Mu, Bo-Zhong] East China Univ Sci & Technol, State Key Lab Bioreactor Engn, Shanghai, Peoples R China; [Yang, Tao; Mbadinga, Serge Maurice; Zhou, Lei; Yang, Shi-Zhong; Liu, Jing-Feng; Mu, Bo-Zhong] East China Univ Sci & Technol, Inst Appl Chem, Shanghai, Peoples R China; [Gu, Ji-Dong] Univ Hong Kong, Sch Biol Sci, Po…	East China University of Science & Technology; East China University of Science & Technology; University of Hong Kong	Mu, BZ (corresponding author), East China Univ Sci & Technol, State Key Lab Bioreactor Engn, Shanghai, Peoples R China.; Mu, BZ (corresponding author), East China Univ Sci & Technol, Inst Appl Chem, Shanghai, Peoples R China.; Mu, BZ (corresponding author), Shanghai Collaborat Innovat Ctr Biomfg Technol, Shanghai 200237, Peoples R China.	bzmu@ecust.edu.cn	Gu, Ji-Dong/AAO-7851-2020; Mu, Bo-Zhong/F-4704-2017; Gu, Ji-Dong/AAF-2291-2019; Mbadinga, Serge Maurice/I-3789-2017	Mu, Bo-Zhong/0000-0002-9564-4970;	National Natural Science Foundation of China [41530318]; Shanghai Fundamental Research Program [15JC1401400]; Fundamental Research Funds for the Central Universities of China [222201717017]	National Natural Science Foundation of China(National Natural Science Foundation of China (NSFC)); Shanghai Fundamental Research Program; Fundamental Research Funds for the Central Universities of China(Fundamental Research Funds for the Central Universities)	The National Natural Science Foundation of China (No. 41530318) and Shanghai Fundamental Research Program (No. 15JC1401400), and the Fundamental Research Funds for the Central Universities of China (No. 222201717017).		53	2	2	3	33	SPRINGER	DORDRECHT	VAN GODEWIJCKSTRAAT 30, 3311 GZ DORDRECHT, NETHERLANDS	0959-3993	1573-0972		WORLD J MICROB BIOT	World J. Microbiol. Biotechnol.	OCT	2017	33	10
J	Lenchi, N; Kebbouche-Gana, S; Servais, P; Gana, ML; Lliros, M				Lenchi, Nesrine; Kebbouche-Gana, Salima; Servais, Pierre; Gana, Mohammed Lamine; Lliros, Marc			Identification and Phylogenetic Analyses of Anaerobic Sulfidogenic Bacteria in Two Algerian Oilfield Water Injection Samples	GEOMICROBIOLOGY JOURNAL			English	Article						Sulfidogenic bacteria; 16S rRNA; clone library; injection water	SULFATE-REDUCING BACTERIA; HIGH-TEMPERATURE; SP NOV.; DESULFOTOMACULUM SPP.; DIVERSITY; SUBSURFACE; DESULFOVIBRIO; RNA	Corrosion of metallic oilfield pipelines by microorganisms is a costly but poorly understood phenomenon. For the first time, sulfidogenic communities in injection waters of two Algerian oilfields, Tin Fuin Tabankort (IT3) and Stah (IS2) were examined using the 16S rRNA gene cloning and sequencing approach. Water samples were inoculated into selective medium for sulfate-reducing bacteria and incub…	[Lenchi, Nesrine] Univ Algiers 1 BenYoucef Benkhedda, Fac Sci, Dept Nat & Life Sci, Algiers, Algeria; [Lenchi, Nesrine] Univ MHamed Bougara Boumerdes, Fac Sci, Bioinformat Appl Microbiol & Biomol Lab, Boumerdes, Algeria; [Kebbouche-Gana, Salima] MHamed Bougara Univ Boumerdes, Fac Sci, Boumerdes, Algeria; [Servais, Pierre] Univ Libre Bruxelles, Ecol Aquat Syst, Brussels, Belgium; [Gana, Mohammed L…	Universite de M'hammed Bougara Boumerdes; Universite de M'hammed Bougara Boumerdes; Universite Libre de Bruxelles; Universite de M'hammed Bougara Boumerdes; Universitat de Vic - Universitat Central de Catalunya (UVic-UCC); Universitat de Girona; Girona University Hospital Dr. Josep Trueta; Institut d'Investigacio Biomedica de Girona (IDIBGI)	Lenchi, N (corresponding author), Univ Algiers 1 BenYoucef Benkhedda, Fac Sci, Dept Nat & Life Sci, Algiers, Algeria.	nesrine.lenchi@hotmail.fr	Nesrine, LENCHI/AAO-9442-2021		Wallonie-Bruxelles International	Wallonie-Bruxelles International	Funding was provided by Wallonie-Bruxelles International. The funders had no role in study design, data collection and analysis, decision to publish, and preparation of the manuscript.		51	1	1	1	3	TAYLOR & FRANCIS INC	PHILADELPHIA	530 WALNUT STREET, STE 850, PHILADELPHIA, PA 19106 USA	0149-0451	1521-0529		GEOMICROBIOL J	Geomicrobiol. J.	AUG 2	2021	38	8
J	Dong, H; Zhang, F; Xu, T; Liu, YL; Du, Y; Wang, C; Liu, TS; Gao, J; He, YL; Wang, XT; Sun, SS; She, YH				Dong, Hao; Zhang, Fan; Xu, Ting; Liu, Yulong; Du, Ying; Wang, Chen; Liu, Tiansheng; Gao, Ji; He, Yanlong; Wang, Xiaotong; Sun, Shanshan; She, Yuehui			Culture-dependent and culture-independent methods reveal microbe-clay mineral interactions by dissimilatory iron-reducing bacteria in an integral oilfield	SCIENCE OF THE TOTAL ENVIRONMENT			English	Article						Culture-dependent; Culture-independent; Iron reduction; MEOR; Tessaracoccus; Flaviflexus	SP-NOV.; GEN.-NOV.; REDUCTION; FE(III); ACTINOBACTERIUM; NONTRONITE; OXIDATION; SMECTITE	Fe(III) may be reasonably considered as one of the most important electron acceptors in petroleum reservoir ecosystems. The microbial mineralization of clay minerals, especially montmorillonite, is also of great significance to the exploration of petroleum and gas reservoirs. The bioreduction mechanisms of iron-poor minerals in petroleum reservoirs have been poorly investigated. This study invest…	[Dong, Hao; Du, Ying; Gao, Ji] Yangtze Univ, Coll Chem & Environm Engn, Jingzhou 434023, Peoples R China; [Zhang, Fan] China Univ Geosci Beijing, Coll Energy Resources, Key Lab Marine Reservoir Evolut & Hydrocarbon Accu, Minist Educ, Beijing 100083, Peoples R China; [Xu, Ting; Wang, Chen; Liu, Tiansheng] Yangtze Univ, Coll Resources & Environm, Wuhan 430010, Peoples R China; [Liu, Yulong; Sun, Sh…	Yangtze University; China University of Geosciences; Yangtze University; Yangtze University; Xi'an Shiyou University; Chinese Academy of Sciences; Institute of Microbiology, CAS; Chinese Academy of Sciences; University of Chinese Academy of Sciences, CAS	Dong, H (corresponding author), Yangtze Univ, Coll Chem & Environm Engn, Jingzhou 434023, Peoples R China.; She, YH (corresponding author), Yangtze Univ, Coll Petr Engn, Key Lab Drilling & Prod Engn Oil & Gas, Wuhan 430010, Peoples R China.	dong_hao2005@163.com; sheyuehui@163.com	she, yuehui/HGA-7099-2022		National Natural Science Foundation of China [51804041, 51634008]; Scientific Research Program - Shaanxi Provincial Education Department [20JS119]	National Natural Science Foundation of China(National Natural Science Foundation of China (NSFC)); Scientific Research Program - Shaanxi Provincial Education Department	This investigation was financially supported by the National Natural Science Foundation of China (51804041, 51634008) , Scientific Research Program Funded by Shaanxi Provincial Education Department (Program No.20JS119) .		52	1	1	34	42	ELSEVIER	AMSTERDAM	RADARWEG 29, 1043 NX AMSTERDAM, NETHERLANDS	0048-9697	1879-1026		SCI TOTAL ENVIRON	Sci. Total Environ.	SEP 20	2022	840
J	McGruer, V; Pasparakis, C; Grosell, M; Stieglitz, JD; Benetti, DD; Greer, JB; Schlenk, D				McGruer, Victoria; Pasparakis, Christina; Grosell, Martin; Stieglitz, John D.; Benetti, Daniel D.; Greer, Justin B.; Schlenk, Daniel			Deepwater Horizon crude oil exposure alters cholesterol biosynthesis with implications for developmental cardiotoxicity in larval mahi-mahi (Coryphaena hippurus)	COMPARATIVE BIOCHEMISTRY AND PHYSIOLOGY C-TOXICOLOGY & PHARMACOLOGY			English	Article						Cholesterol; Mahi-mahi; Cardiotoxicity; Fish development; Oil spill; Polycyclic aromatic hydrocarbons; Farnesyl-diphosphate farnesyltransferase 1; 3-Hydroxy-3-Methylglutaryl-CoA Reductase; SREBP cleavage-activating protein	OXYGEN-CONSUMPTION; TOXICITY; EMBRYOS; TIME; TEMPERATURE; ADAPTATION; RESPONSES; IMPAIRS	During the spring and summer of 2010, the Deepwater Horizon (DWH) oil well released over three million barrels of crude oil into the Gulf of Mexico. As the oil dispersed it contaminated ecosystems that support numerous Gulf species including mahi-mahi (Coryphaena hippurus). The timing of the spill, and location of the surface slick, coincided with the spawning of many species in the region, raisi…	[McGruer, Victoria] Univ Calif Riverside, Environm Toxicol Grad Program, Riverside, CA 92521 USA; [Pasparakis, Christina; Grosell, Martin; Stieglitz, John D.; Benetti, Daniel D.] Univ Miami, Rosenstiel Sch Marine & Atmospher Sci, Dept Marine Biol & Ecol, 4600 Rickenbacker Causeway, Miami, FL 33149 USA; [McGruer, Victoria; Greer, Justin B.; Schlenk, Daniel] Univ Calif Riverside, Dept Environm Sci,…	University of California System; University of California Riverside; University of Miami; University of California System; University of California Riverside	McGruer, V (corresponding author), Univ Calif Riverside, Environm Toxicol Grad Program, Riverside, CA 92521 USA.; McGruer, V (corresponding author), Univ Calif Riverside, Dept Environm Sci, Riverside, CA 92521 USA.	vmcgr001@ucr.edu; cpasparakis@rsmas.miami.edu; mgrosell@rsmas.miami.edu; jstieglitz@rsmas.miami.edu; dbenetti@rsmas.miami.edu; jgreer@ucr.edu; daniel.schlenk@ucr.edu	Pasparakis, Christina/AFK-6308-2022; Pasparakis, Christina/AAG-4583-2022; McGruer, Victoria/HGA-7729-2022	Schlenk, Daniel/0000-0001-5519-2298; McGruer, Victoria/0000-0003-3570-5812; Greer, Justin/0000-0001-6660-9976	Gulf of Mexico Research Initiative; Gulf of Mexico Research Initiative Information & Data Cooperative	Gulf of Mexico Research Initiative; Gulf of Mexico Research Initiative Information & Data Cooperative	Valuable advice was provided by Marissa Giroux and Elvis Xu. This research was made possible by a grant from the Gulf of Mexico Research Initiative. Name: Relationship of Effects of Cardiac Outcomes in fish for Validation of Ecological Risk II (RECOVER II). Data are publicly available through the Gulf of Mexico Research Initiative Information & Data Cooperative (GRIIDC) at https://data.gulfresear…		44	18	18	0	18	ELSEVIER SCIENCE INC	NEW YORK	STE 800, 230 PARK AVE, NEW YORK, NY 10169 USA	1532-0456	1878-1659		COMP BIOCHEM PHYS C	Comp. Biochem. Physiol. C-Toxicol. Pharmacol.	JUN	2019	220
J	Monzon, O; Yang, Y; Li, QL; Alvarez, PJJ				Monzon, Oihane; Yang, Yu; Li, Qilin; Alvarez, Pedro J. J.			Quorum sensing autoinducers enhance biofilm formation and power production in a hypersaline microbial fuel cell	BIOCHEMICAL ENGINEERING JOURNAL			English	Article						Halanaerobium praevalens; Biofilm; Quorum sensing; Quinolone; High salinity	PSEUDOMONAS-AERUGINOSA; ESCHERICHIA-COLI; GENE-EXPRESSION; SHALE GAS; COMMUNICATION; COMMUNITIES; WATER; THAILANDENSIS; PRAEVALENS; QUINOLONES	Intensive hydraulic fracturing of shale oil and gas reservoirs and other industrial activities can produce large volumes of high-organic-strength and high-salinity wastewaters that are difficult to treat by conventional technologies. Microbial fuel cells (MFC) can treat high-strength wastewater while generating electricity. We enhanced anodic biofilm formation by the extremophile Halanaerobium pr…	[Monzon, Oihane; Yang, Yu; Li, Qilin; Alvarez, Pedro J. J.] Rice Univ, Dept Civil & Environm Engn, Houston, TX 77005 USA	Rice University	Alvarez, PJJ (corresponding author), Rice Univ, Dept Civil & Environm Engn, Houston, TX 77005 USA.	alvarez@rice.edu	Alvarez, Pedro/AAE-7216-2019; Li, Qilin/A-8970-2008	Alvarez, Pedro/0000-0002-6725-7199; Li, Qilin/0000-0001-5756-3873	BP North America	BP North America	We thank Dr. Alloysius Budi Utama for his assistance with confocal microscopy. This research Work was supported by BP North America.		36	46	52	6	168	ELSEVIER SCIENCE BV	AMSTERDAM	PO BOX 211, 1000 AE AMSTERDAM, NETHERLANDS	1369-703X	1873-295X		BIOCHEM ENG J	Biochem. Eng. J.	MAY 15	2016	109
J	Grabowski, A; Nercessian, O; Fayolle, F; Blanchet, D; Jeanthon, C				Grabowski, A; Nercessian, O; Fayolle, F; Blanchet, D; Jeanthon, C			Microbial diversity in production waters of a low-temperature biodegraded oil reservoir	FEMS MICROBIOLOGY ECOLOGY			English	Article						oil reservoir; molecular ecology; homoacetogens; acetoclastic methanogens; 16S rRNA gene diversity	SULFATE-REDUCING BACTERIA; SUBSURFACE PETROLEUM RESERVOIRS; RIBOSOMAL-RNA GENES; DEEP SUBSURFACE; SP-NOV; PHYLOGENETIC ANALYSIS; MOLECULAR CHARACTERIZATION; ENVIRONMENTAL-SAMPLES; THERMOPHILIC BACTERIA; METHANE FORMATION	Microbial communities in two production waters of a low-temperature and low-salinity petroleum reservoir in Canada were examined using cultural and molecular approaches. The predominant cultivated microorganisms were homoacetogens but Sulfate-reducers, acetoclastic methanogens and denitrifiers also gave significant counts. The dominant members of the culturable population were affiliated with the…	IFREMER, UMR 6197, Lab Microbiol Environm Extremes, CNRS, F-29280 Plouzane, France; IFP Energies Nouvelles, F-92852 Rueil Malmaison, France; Univ Bretagne Occidentale, Inst Europeen Mer, F-29280 Plouzane, France	Centre National de la Recherche Scientifique (CNRS); CNRS - Institute of Ecology & Environment (INEE); Ifremer; Universite de Bretagne Occidentale; IFP Energies Nouvelles; Universite de Bretagne Occidentale; Institut Universitaire Europeen de la Mer (IUEM)	Jeanthon, C (corresponding author), IFREMER, UMR 6197, Lab Microbiol Environm Extremes, CNRS, F-29280 Plouzane, France.	christian.jeanthon@univ-brest.fr		Jeanthon, Christian/0000-0002-7339-574X					93	222	248	1	61	OXFORD UNIV PRESS	OXFORD	GREAT CLARENDON ST, OXFORD OX2 6DP, ENGLAND	0168-6496	1574-6941		FEMS MICROBIOL ECOL	FEMS Microbiol. Ecol.	NOV 1	2005	54	3
J	Crosby, LM; Tatu, CA; Varonka, M; Charles, KM; Orem, WH				Crosby, L. M.; Tatu, Calin A.; Varonka, Matthew; Charles, Kaylene M.; Orem, William H.			Toxicological and chemical studies of wastewater from hydraulic fracture and conventional shale gas wells	ENVIRONMENTAL TOXICOLOGY AND CHEMISTRY			English	Article						Environmental contaminants; Human health; Gene expression; Unconventional natural gas; Oil well	GENE-EXPRESSION; CELL; PROLIFERATION; OPERATIONS; MIGRATION; BASIN; OIL	New technology has enabled recovery of inaccessible natural gas shale deposits; however, the potential impacts to human health from the migration of brines into drinking water or surface spills are unknown. To provide information that can inform these potential impacts, chemical characterization and in vitro toxicologic testing were conducted using pre- and postinjection waters from conventional …	[Crosby, L. M.; Tatu, Calin A.; Varonka, Matthew; Orem, William H.] US Geol Survey, 959 Natl Ctr, Reston, VA 22092 USA; [Tatu, Calin A.] Univ Med & Pharm, Dept Biol, Timisoara, Romania; [Charles, Kaylene M.] Temple Univ, Philadelphia, PA 19122 USA	United States Department of the Interior; United States Geological Survey; Victor Babes University of Medicine & Pharmacy, Timisoara; Pennsylvania Commonwealth System of Higher Education (PCSHE); Temple University	Crosby, LM (corresponding author), US Geol Survey, 959 Natl Ctr, Reston, VA 22092 USA.	lcrosby8@yahoo.com.sg		Varonka, Matthew/0000-0003-3620-5262	US Geological Survey, Energy Resources Program	US Geological Survey, Energy Resources Program	The present project was supported by the US Geological Survey, Energy Resources Program.		36	6	6	0	29	WILEY	HOBOKEN	111 RIVER ST, HOBOKEN 07030-5774, NJ USA	0730-7268	1552-8618		ENVIRON TOXICOL CHEM	Environ. Toxicol. Chem.	AUG	2018	37	8
J	Li, H; Mu, BZ; Jiang, Y; Gu, JD				Li, Hui; Mu, Bo-Zhong; Jiang, Yan; Gu, Ji-Dong			Production Processes Affected Prokaryotic amoA Gene Abundance and Distribution in High-Temperature Petroleum Reservoirs	GEOMICROBIOLOGY JOURNAL			English	Article						ammonia-oxidation archaea; ammonia-oxidation bacteria; ammonia monooxygenase (amoA); petroleum reservoir	AMMONIA-OXIDIZING BACTERIA; THERMOPHILIC NITRIFYING BACTERIA; SULFATE-REDUCING BACTERIA; TERRESTRIAL HOT-SPRINGS; 16S RIBOSOMAL-RNA; COMMUNITY STRUCTURE; MICROBIAL DIVERSITY; NITRITE REDUCTASE; IMPORTANT PLAYERS; DISSOLVED-OXYGEN	Although the presence and activity of ammonia-oxidation archaea (AOA) and ammonia-oxidation bacteria (AOB) were observed in thermophilic habitats recently, their existence in the geothermal subterranean oil reservoirs is still not available. This study investigated the abundance and distribution of AOA and AOB in the production waters of high-temperature oil reservoirs by using real-time PCR and …	[Li, Hui; Gu, Ji-Dong] Univ Hong Kong, Sch Biol Sci, Hong Kong, Hong Kong, Peoples R China; [Li, Hui] E China Univ Sci & Technol, State Environm Protect Key Lab Environm Risk Asse, Sch Resources & Environm Engn, Shanghai 200237, Peoples R China; [Mu, Bo-Zhong] E China Univ Sci & Technol, State Key Lab Bioreactor Engn, Shanghai 200237, Peoples R China; [Mu, Bo-Zhong] E China Univ Sci & Technol, In…	University of Hong Kong; East China University of Science & Technology; East China University of Science & Technology; East China University of Science & Technology; Sinopec; University of Hong Kong	Gu, JD (corresponding author), Univ Hong Kong, Sch Biol Sci, Pokfulam Rd, Hong Kong, Hong Kong, Peoples R China.	jdgu@hkucc.hku.hk	Hui, Li/B-4166-2009; Gu, Ji-Dong/AAF-2291-2019; Mu, Bo-Zhong/F-4704-2017; Gu, Ji-Dong/AAO-7851-2020	Hui, Li/0000-0002-7574-048X; Mu, Bo-Zhong/0000-0002-9564-4970;	Environmental Toxicology Fund; National Natural Science Foundation of China [40871223, 40901148, 41003031, 41073055]; National High Technology Research and Development Program of China [2007AA06Z331]; Fundamental Research Funds for the Central Universities [WB0911011, WB1014004]	Environmental Toxicology Fund; National Natural Science Foundation of China(National Natural Science Foundation of China (NSFC)); National High Technology Research and Development Program of China(National High Technology Research and Development Program of China); Fundamental Research Funds for the Central Universities(Fundamental Research Funds for the Central Universities)	This study was supported by Environmental Toxicology Fund (J-D G); National Natural Science Foundation of China (40871223, 40901148, 41003031, 41073055); National High Technology Research and Development Program of China (2007AA06Z331); and Fundamental Research Funds for the Central Universities (WB0911011, WB1014004). We thank Jessie Lai for laboratory assistance and Huiluo Cao for useful discus…		97	23	25	3	44	TAYLOR & FRANCIS INC	PHILADELPHIA	530 WALNUT STREET, STE 850, PHILADELPHIA, PA 19106 USA	0149-0451	1521-0529		GEOMICROBIOL J	Geomicrobiol. J.		2011	28	8
J	Galazka, A; Grzadziel, J; Galazka, R; Gawryjolek, K; Ukalska-Jaruga, A; Smreczak, B				Galazka, Anna; Grzadziel, Jaroslaw; Galazka, Rafal; Gawryjolek, Karolina; Ukalska-Jaruga, Aleksandra; Smreczak, Bozena			Fungal Community, Metabolic Diversity, and Glomalin-Related Soil Proteins (GRSP) Content in Soil Contaminated With Crude Oil After Long-Term Natural Bioremediation	FRONTIERS IN MICROBIOLOGY			English	Article						fungal community; genetic diversity; metabolic profiles; glomalin-related soil proteins; Biolog FFPlates; ITS gene region; NGS	POLYCYCLIC AROMATIC-HYDROCARBONS; ARBUSCULAR MYCORRHIZAL FUNGI; HEAVY-METALS; ECTOMYCORRHIZAL FUNGI; FUNCTIONAL DIVERSITY; SURFACE SOILS; DISSIPATION; HYPHAE; PLANTS; PAHS	Fungi have increased tolerance to environmental stress (also related to the access of pollutants, e.g., trace elements and polycyclic aromatic hydrocarbons PAHs). The aim of the study was to evaluate the mycobiome and functional diversity of fungi in long-term crude-oil contaminated soils as the potential bioremediators of oil contaminated sites. Samples were taken from three historical oil wells…	[Galazka, Anna; Grzadziel, Jaroslaw; Gawryjolek, Karolina] State Res Inst, Inst Soil Sci & Plant Cultivat, Dept Agr Microbiol, Pulawy, Poland; [Galazka, Rafal; Ukalska-Jaruga, Aleksandra; Smreczak, Bozena] State Res Inst, Inst Soil Sci & Plant Cultivat, Dept Soil Sci Eros & Land Protect, Pulawy, Poland	Institute of Soil Science & Plant Cultivation; Institute of Soil Science & Plant Cultivation	Galazka, A (corresponding author), State Res Inst, Inst Soil Sci & Plant Cultivat, Dept Agr Microbiol, Pulawy, Poland.	agalazka@iung.pulawy.pl	Grządziel, Jarosław/J-4610-2019; Gałązka, Anna/J-8375-2019; Grządziel, Jarosław JG/K-2784-2017; Gawryjołek, Karolina/M-9726-2019	Grządziel, Jarosław/0000-0003-3028-1256; Gałązka, Anna/0000-0001-5504-5706; Grządziel, Jarosław JG/0000-0003-3028-1256; Gawryjołek, Karolina/0000-0003-2432-8046; Ukalska-Jaruga, Aleksandra/0000-0002-9253-2383; Smreczak, Bozena/0000-0001-8972-8636	IUNG-PIB [1.20]; Task 1.4. Multi - Annual Programme IUNG - PIB (2016-2020)	IUNG-PIB; Task 1.4. Multi - Annual Programme IUNG - PIB (2016-2020)	This work was funded from the budget for science by the statutory activity of IUNG-PIB (1.20) and the frames of Task 1.4. Multi - Annual Programme IUNG - PIB (2016-2020).		57	13	13	9	46	FRONTIERS MEDIA SA	LAUSANNE	AVENUE DU TRIBUNAL FEDERAL 34, LAUSANNE, CH-1015, SWITZERLAND		1664-302X		FRONT MICROBIOL	Front. Microbiol.	SEP 17	2020	11
J	Scheffer, G; Hubert, CRJ; Enning, DR; Lahme, S; Mand, J; de Rezende, JR				Scheffer, Gabrielle; Hubert, Casey R. J.; Enning, Dennis R.; Lahme, Sven; Mand, Jaspreet; de Rezende, Julia R.			Metagenomic Investigation of a Low Diversity, High Salinity Offshore Oil Reservoir	MICROORGANISMS			English	Article						Gulf of Mexico; marine subsurface; formation water; polyextremophiles; microbial adaptation; microbial persistence; metagenomics; halophiles; radionuclide resistance; metal acquisition	DEINOCOCCUS-RADIODURANS; SP-NOV; BACTERIA; SUBSURFACE; ASSOCIATIONS; DEGRADATION; MECHANISM; PHENOL; WATERS; GENES	Oil reservoirs can represent extreme environments for microbial life due to low water availability, high salinity, high pressure and naturally occurring radionuclides. This study investigated the microbiome of saline formation water samples from a Gulf of Mexico oil reservoir. Metagenomic analysis and associated anaerobic enrichment cultures enabled investigations into metabolic potential for mic…	[Scheffer, Gabrielle; Hubert, Casey R. J.] Univ Calgary, Dept Biol Sci, Calgary, AB T2N 1N4, Canada; [Hubert, Casey R. J.; Lahme, Sven; de Rezende, Julia R.] Newcastle Univ, Sch Nat & Environm Sci, Newcastle Upon Tyne NE1 7RU, Tyne & Wear, England; [Enning, Dennis R.] Berlin Univ Appl Sci & Technol, Fac Life Sci & Technol, D-13347 Berlin, Germany; [Lahme, Sven; Mand, Jaspreet] Exxon Mobil Upstrea…	University of Calgary; Newcastle University - UK; Berliner Hochschule fur Technik; Exxon Mobil Corporation; Heriot Watt University	Hubert, CRJ (corresponding author), Univ Calgary, Dept Biol Sci, Calgary, AB T2N 1N4, Canada.; Hubert, CRJ (corresponding author), Newcastle Univ, Sch Nat & Environm Sci, Newcastle Upon Tyne NE1 7RU, Tyne & Wear, England.	gabrielle.scheffe1@ucalgary.ca; chubert@ucalgary.ca; dennis.enning@bht-berlin.de; sven.a.lahme@exxonmobil.com; jaspreet.mand@exxonmobil.com; j.de.rezende@hw.ac.uk		Scheffer, Gabrielle/0000-0002-8027-2086	UK Engineering and Physical Sciences Research Council [EP/J002259/1, EP/L001942/1]; ExxonMobil Upstream Research Company [EM09030]; Natural Sciences and Engineering Research Council of Canada (NSERC); NSERC (Alexander Graham Bell scholarship program); Natural Resources Canada; Eyes High program (University of Calgary)	UK Engineering and Physical Sciences Research Council(UK Research & Innovation (UKRI)Engineering & Physical Sciences Research Council (EPSRC)); ExxonMobil Upstream Research Company(Exxon Mobil Corporation); Natural Sciences and Engineering Research Council of Canada (NSERC)(Natural Sciences and Engineering Research Council of Canada (NSERC)); NSERC (Alexander Graham Bell scholarship program); Nat…	This work was supported by grants from the UK Engineering and Physical Sciences Research Council (EP/J002259/1, EP/L001942/1), ExxonMobil Upstream Research Company (project EM09030) and the Natural Sciences and Engineering Research Council of Canada (NSERC) to C.R.J.H., and by scholarship funding to G.S. from NSERC (Alexander Graham Bell scholarship program),Natural Resources Canada and the Eyes …		92	4	4	2	15	MDPI	BASEL	ST ALBAN-ANLAGE 66, CH-4052 BASEL, SWITZERLAND		2076-2607		MICROORGANISMS	Microorganisms	NOV	2021	9	11
J	Vigneron, A; Head, IM; Tsesmetzis, N				Vigneron, Adrien; Head, Ian M.; Tsesmetzis, Nicolas			Damage to offshore production facilities by corrosive microbial biofilms	APPLIED MICROBIOLOGY AND BIOTECHNOLOGY			English	Review						MIC; Corrosion; Microbiologically influenced corrosion; Biocorrosion; Biofouling	SULFATE-REDUCING BACTERIA; MICROBIOLOGICALLY INFLUENCED CORROSION; DESULFOVIBRIO-VULGARIS BIOFILM; OIL PRODUCTION FACILITY; CARBON-STEEL; PELOBACTER-CARBINOLICUS; IRON CORROSION; BIOCORROSION; MICROORGANISMS; PIPELINES	In offshore production facilities, large amounts of deaerated seawater are continuously injected to maintain pressure in oil reservoirs and equivalent volumes of fluids, composed of an oil/gas, and water mixture are produced. This process, brewing billions of liters of biphasic fluids particularly rich in microorganisms, goes through complex steel pipeline networks that are particularly prone to …	[Vigneron, Adrien; Tsesmetzis, Nicolas] Newcastle Univ, Sch Civil Engn & Geosci, Newcastle Upon Tyne, Tyne & Wear, England; [Vigneron, Adrien; Head, Ian M.; Tsesmetzis, Nicolas] Shell Int Explorat & Prod Inc, Houston, TX 77082 USA	Newcastle University - UK; Royal Dutch Shell	Vigneron, A (corresponding author), Newcastle Univ, Sch Civil Engn & Geosci, Newcastle Upon Tyne, Tyne & Wear, England.; Vigneron, A (corresponding author), Shell Int Explorat & Prod Inc, Houston, TX 77082 USA.	avignero@gmail.com		Head, Ian/0000-0002-5373-162X; Tsesmetzis, Nicolas/0000-0001-5246-0568; Vigneron, Adrien/0000-0003-3552-8369	NERC [NE/J024325/1] Funding Source: UKRI; Natural Environment Research Council [NE/J024325/1] Funding Source: researchfish	NERC(UK Research & Innovation (UKRI)Natural Environment Research Council (NERC)); Natural Environment Research Council(UK Research & Innovation (UKRI)Natural Environment Research Council (NERC))			80	44	45	10	70	SPRINGER	NEW YORK	233 SPRING ST, NEW YORK, NY 10013 USA	0175-7598	1432-0614		APPL MICROBIOL BIOT	Appl. Microbiol. Biotechnol.	MAR	2018	102	6
J	Menendez-Gil, P; Toledo-Arana, A				Menendez-Gil, Pilar; Toledo-Arana, Alejandro			Bacterial 3 ' UTRs: A Useful Resource in Post-transcriptional Regulation	FRONTIERS IN MOLECULAR BIOSCIENCES			English	Review						3 ' UTR; bacteria; gene expression regulation; RNA-binding proteins (RBPs); ncRNAs (non-coding RNAs); regulatory small RNAs (sRNAs); post-transcription regulation	STAPHYLOCOCCUS-AUREUS RNAIII; CIS-ANTISENSE RNA; MESSENGER-RNA; UNTRANSLATED REGION; SOLUBLE-RNA; VIRULENCE FACTOR; GENE-REGULATION; 3' UTRS; TRANSCRIPTION; STRESS	Bacterial messenger RNAs (mRNAs) are composed of 5 ' and 3 ' untranslated regions (UTRs) that flank the coding sequences (CDSs). In eukaryotes, 3 ' UTRs play key roles in post-transcriptional regulatory mechanisms. Shortening or deregulation of these regions is associated with diseases such as cancer and metabolic disorders. Comparatively, little is known about the functions of 3 ' UTRs in bacter…	[Menendez-Gil, Pilar; Toledo-Arana, Alejandro] Consejo Super Invest Cient CSIC Gobierno Navarra, Inst Agrobiotecnol IdAB, Navarra, Spain	Consejo Superior de Investigaciones Cientificas (CSIC); CSIC-GN-UPNA - Instituto de Agrobiotecnologia (IDAB)	Toledo-Arana, A (corresponding author), Consejo Super Invest Cient CSIC Gobierno Navarra, Inst Agrobiotecnol IdAB, Navarra, Spain.	a.toledo.arana@csic.es	Toledo-Arana, Alejandro/F-9624-2011	Toledo-Arana, Alejandro/0000-0001-8148-6281; Menendez-Gil, Pilar/0000-0002-6264-6857	European Research Council (ERC) under the European Union's Horizon 2020 research and innovation program [ERC-CoG-2014-646869]; Spanish Ministry of Science and Innovation [PID2019-105216GB-I00]	European Research Council (ERC) under the European Union's Horizon 2020 research and innovation program(European Research Council (ERC)); Spanish Ministry of Science and Innovation(Ministry of Science and Innovation, Spain (MICINN)Spanish Government)	This work was supported by the European Research Council (ERC) under the European Union's Horizon 2020 research and innovation program (Grant Agreement No. ERC-CoG-2014-646869) and the Spanish Ministry of Science and Innovation grant (PID2019-105216GB-I00).		121	6	6	1	10	FRONTIERS MEDIA SA	LAUSANNE	AVENUE DU TRIBUNAL FEDERAL 34, LAUSANNE, CH-1015, SWITZERLAND		2296-889X		FRONT MOL BIOSCI	Front. Mol. Biosci.	JAN 8	2021	7
J	Ji, JH; Liu, YF; Zhou, L; Mbadinga, SM; Pan, P; Chen, J; Liu, JF; Yang, SZ; Sand, W; Gu, JD; Mu, BZ				Ji, Jia-Heng; Liu, Yi-Fan; Zhou, Lei; Mbadinga, Serge Maurice; Pan, Pan; Chen, Jing; Liu, Jin-Feng; Yang, Shi-Zhong; Sand, Wolfgang; Gu, Ji-Dong; Mu, Bo-Zhong			Methanogenic Degradation of Long n-Alkanes Requires Fumarate-Dependent Activation	APPLIED AND ENVIRONMENTAL MICROBIOLOGY			English	Article						(1-methylalkyl)succinate; biodegradation; fumarate addition; hydrocarbon; long n-alkanes; methanogenesis	CRUDE-OIL BIODEGRADATION; 16S RIBOSOMAL-RNA; ANAEROBIC DEGRADATION; DENITRIFYING BACTERIUM; REDUCING BACTERIUM; METHANE; ENRICHMENT; ALKYL; (1-METHYLPENTYL)SUCCINATE; INVOLVEMENT	Methanogenic degradation of n-alkanes is prevalent in n-alkane-impacted anoxic oil reservoirs and oil-polluted sites. However, little is known about the initial activation mechanism of the substrate, especially n-alkanes with a chain length above C-16. Here, a methanogenic C-16 to C-20 n-alkane-degrading enrichment culture was established from production water of a low-temperature oil reservoir. …	[Ji, Jia-Heng; Liu, Yi-Fan; Zhou, Lei; Mbadinga, Serge Maurice; Pan, Pan; Chen, Jing; Liu, Jin-Feng; Yang, Shi-Zhong; Mu, Bo-Zhong] East China Univ Sci & Technol, State Key Lab Bioreactor Engn, Shanghai, Peoples R China; [Ji, Jia-Heng; Liu, Yi-Fan; Zhou, Lei; Mbadinga, Serge Maurice; Pan, Pan; Chen, Jing; Liu, Jin-Feng; Yang, Shi-Zhong; Mu, Bo-Zhong] East China Univ Sci & Technol, Sch Chem & Mol …	East China University of Science & Technology; East China University of Science & Technology; Donghua University; Technical University Freiberg; University of Duisburg Essen; University of Hong Kong; East China University of Science & Technology	Mu, BZ (corresponding author), East China Univ Sci & Technol, State Key Lab Bioreactor Engn, Shanghai, Peoples R China.; Mu, BZ (corresponding author), East China Univ Sci & Technol, Sch Chem & Mol Engn, Shanghai, Peoples R China.; Gu, JD (corresponding author), Univ Hong Kong, Sch Biol Sci, Hong Kong, Peoples R China.; Mu, BZ (corresponding author), East China Univ Sci & Technol, Engn Res Ctr Mi…	jdgu@hkucc.hku.hk; bzmu@ecust.edu.cn	Mu, Bo-Zhong/F-4704-2017; Mbadinga, Serge Maurice/I-3789-2017; Gu, Ji-Dong/AAF-2291-2019; Gu, Ji-Dong/AAO-7851-2020	Mu, Bo-Zhong/0000-0002-9564-4970; Liu, Jinfeng/0000-0002-9200-2999	National Natural Science Foundation of China [41530318, 41373070]; NSFC/RGC Joint Research Fund [41161160560]; Shanghai Fundamental Research Program [15JC1401400]; Fundamental Research Funds for the Central Universities [222201817017, 50321101917017, 22221818014]; Research Program of State Key Laboratory of Bioreactor Engineering	National Natural Science Foundation of China(National Natural Science Foundation of China (NSFC)); NSFC/RGC Joint Research Fund; Shanghai Fundamental Research Program; Fundamental Research Funds for the Central Universities(Fundamental Research Funds for the Central Universities); Research Program of State Key Laboratory of Bioreactor Engineering	This work was supported by the National Natural Science Foundation of China (grant no. 41530318 and 41373070), the NSFC/RGC Joint Research Fund (no. 41161160560), the Shanghai Fundamental Research Program (no. 15JC1401400), the Fundamental Research Funds for the Central Universities (no. 222201817017, 50321101917017, and 22221818014), and the Research Program of State Key Laboratory of Bioreactor…		49	16	16	5	37	AMER SOC MICROBIOLOGY	WASHINGTON	1752 N ST NW, WASHINGTON, DC 20036-2904 USA	0099-2240	1098-5336		APPL ENVIRON MICROB	Appl. Environ. Microbiol.	AUG	2019	85	16
J	Yang, XL; Sha, KH; Xu, GY; Tian, HW; Wang, XY; Chen, SZ; Wang, Y; Li, JY; Chen, JL; Huang, N				Yang, Xiaolong; Sha, Kaihui; Xu, Guangya; Tian, Hanwen; Wang, Xiaoying; Chen, Shanze; Wang, Yi; Li, Jingyu; Chen, Junli; Huang, Ning			Subinhibitory Concentrations of Allicin Decrease Uropathogenic Escherichia coli (UPEC) Biofilm Formation, Adhesion Ability, and Swimming Motility	INTERNATIONAL JOURNAL OF MOLECULAR SCIENCES			English	Article						allicin; uropathogenic Escherichia coli; biofilm formation and dispersal	URINARY-TRACT-INFECTIONS; BLADDER EPITHELIAL-CELLS; GENE-EXPRESSION; FIMH ADHESIN; EPIDEMIOLOGY; ATTACHMENT; BINDING; ENTRY	Uropathogenic Escherichia coli (UPEC) biofilm formation enables the organism to avoid the host immune system, resist antibiotics, and provide a reservoir for persistent infection. Once the biofilm is established, eradication of the infection becomes difficult. Therefore, strategies against UPEC biofilm are urgently required. In this study, we investigated the effect of allicin, isolated from garl…	[Yang, Xiaolong; Sha, Kaihui; Xu, Guangya; Tian, Hanwen; Wang, Xiaoying; Chen, Shanze; Wang, Yi; Li, Jingyu; Chen, Junli; Huang, Ning] Sichuan Univ, West China Sch Preclin & Forens Med, Dept Pathophysiol, Res Unit Infect & Immun, Chengdu 610000, Sichuan, Peoples R China	Sichuan University	Chen, JL; Huang, N (corresponding author), Sichuan Univ, West China Sch Preclin & Forens Med, Dept Pathophysiol, Res Unit Infect & Immun, Chengdu 610000, Sichuan, Peoples R China.	fantasyyxl@sina.com; shakaihui@scu.edu.cn; xuguangya@scu.edu.cn; tianhanwen@scu.edu.cn; wangxiaoying@scu.edu.cn; chenshanze@scu.edu.cn; wy4504228@163.com; jingyuli@scu.edu.cn; chenjunlinsf@163.com; huangpanxiao222@sina.com	Li, Jingyu/GSD-1924-2022		National Natural Science Foundation of China [81470931, 31401188]; Young Scholars of Sichuan University [2082604194222]; Sichuan University 985 Project-Science and Technology Innovation Platform for Novel Drug Development	National Natural Science Foundation of China(National Natural Science Foundation of China (NSFC)); Young Scholars of Sichuan University; Sichuan University 985 Project-Science and Technology Innovation Platform for Novel Drug Development	This work was supported by grants from the National Natural Science Foundation of China (81470931, 31401188), Young Scholars of Sichuan University (2082604194222) and Sichuan University 985 Project-Science and Technology Innovation Platform for Novel Drug Development.		38	22	25	1	26	MDPI AG	BASEL	ST ALBAN-ANLAGE 66, CH-4052 BASEL, SWITZERLAND	1422-0067			INT J MOL SCI	Int. J. Mol. Sci.	JUL	2016	17	7
J	Roling, WFM; Ortega-Lucach, S; Larter, SR; Head, IM				Roling, W. F. M.; Ortega-Lucach, S.; Larter, S. R.; Head, I. M.			Acidophilic microbial communities associated with a natural, biodegraded hydrocarbon seepage	JOURNAL OF APPLIED MICROBIOLOGY			English	Article						acidophilic communities; outcrop oil seep; PCR-DGGE; petroleum biodegradation; 16S rRNA genes	GRADIENT GEL-ELECTROPHORESIS; YELLOWSTONE-NATIONAL-PARK; 16S RIBOSOMAL-RNA; HETEROTROPHIC BACTERIA; PETROLEUM RESERVOIRS; DIVERSITY; BIOREMEDIATION; DEGRADATION; OIL; GEOCHEMISTRY	Aims: Characterization of microbial communities present in a surface petroleum seep in which hydrocarbons have been biodegraded for thousands of years in order to improve the understanding on natural petroleum biodegradation. Methods and Results: DNA was extracted from a natural, surface petroleum seep and subjected to culture independent analysis (rRNA gene-based denaturing gradient gel electrop…	Newcastle Univ, Sch Civil Engn & Geosci, Newcastle Upon Tyne NE1 7RU, Tyne & Wear, England; Newcastle Univ, Inst Res Environm & Sustainabil, Newcastle Upon Tyne NE1 7RU, Tyne & Wear, England	Newcastle University - UK; Newcastle University - UK	Roling, WFM (corresponding author), Free Univ Amsterdam, Fac Earth & Life Sci, De Boelelaan 1085, NL-1081 HV Amsterdam, Netherlands.	Wilfred.roling@falw.vu.nl	Abu Laban, Nidal/E-5809-2011	Head, Ian/0000-0002-5373-162X; Larter, Stephen/0000-0001-7195-1477					39	27	28	0	13	WILEY-BLACKWELL PUBLISHING, INC	MALDEN	COMMERCE PLACE, 350 MAIN ST, MALDEN 02148, MA USA	1364-5072			J APPL MICROBIOL	J. Appl. Microbiol.	AUG	2006	101	2
J	Gillard, JTF; Hernandez, AL; Contreras, JA; Francis, IM; Cabrales, L				Gillard, Jeroen T. F.; Hernandez, Alexander L.; Contreras, Javier A.; Francis, Isolde M.; Cabrales, Luis			Potential for Biomass Production and Remediation by Cultivation of the Marine Model Diatom Phaeodactylum tricornutum in Oil Field Produced Wastewater Media	WATER			English	Article						produced water; oil field; diatom; phytoremediation; microalgae; cultivation	ENRICHED SEAWATER; GENE-EXPRESSION; MICROALGAE; BIOFUELS; NITRATE; GROWTH; CULTURE; COPPER; CO2; BACILLARIOPHYCEAE	While oilfield produced water (PW) is one of the largest, unclaimed wastewater streams of the oil industry, it could potentially be used as a cultivation medium for microalgae. Microalgae could help with the remediation of this water while also delivering biomass that can be transformed into valuable byproducts such as biofuels. The coupling of these two purposes is expected to cut production cos…	[Gillard, Jeroen T. F.; Hernandez, Alexander L.; Contreras, Javier A.; Francis, Isolde M.] Calif State Univ, Dept Biol, 9001 Stockdale Highway, Bakersfield, CA 93311 USA; [Cabrales, Luis] Calif State Univ, Dept Phys & Engn, 9001 Stockdale Highway, Bakersfield, CA 93311 USA	California State University System; California State University Bakersfield; California State University System; California State University Bakersfield	Gillard, JTF (corresponding author), Calif State Univ, Dept Biol, 9001 Stockdale Highway, Bakersfield, CA 93311 USA.	jgillard@csub.edu; ahernandez232@csub.edu; jcontreras47@csub.edu; ifrancis@csub.edu; lcabrales@csub.edu	; Gillard, Jeroen/T-6536-2017	Contreras, Javier/0000-0002-1717-0466; Gillard, Jeroen/0000-0002-6248-0519	United States Department of Agriculture (USDA) National Institute of Food and Agriculture (NIFA) [2018-70001-27831]; California State University (CSU) Water Resources & Policy Initiative (WRPI); Research Council of the University (RCU) of CSU Bakersfield	United States Department of Agriculture (USDA) National Institute of Food and Agriculture (NIFA)(United States Department of Agriculture (USDA)); California State University (CSU) Water Resources & Policy Initiative (WRPI); Research Council of the University (RCU) of CSU Bakersfield	FundingThis research was funded by the United States Department of Agriculture (USDA) National Institute of Food and Agriculture (NIFA), Award number 2018-70001-27831, the California State University (CSU) Water Resources & Policy Initiative (WRPI), and the Research Council of the University (RCU) of CSU Bakersfield.		89	2	2	11	22	MDPI	BASEL	ST ALBAN-ANLAGE 66, CH-4052 BASEL, SWITZERLAND		2073-4441		WATER-SUI	Water	OCT	2021	13	19
J	Li, CY; Hu, H; Feng, JY; Mbadinga, SM; Liu, JF; Yang, SZ; Gu, JD; Mu, BZ				Li, Cai-Yun; Hu, Hao; Feng, Jun-Ying; Mbadinga, Serge Maurice; Liu, Jin-Feng; Yang, Shi-Zhong; Gu, Ji-Dong; Mu, Bo-Zhong			Diversity and abundance of ammonia-oxidizing bacteria (AOB) revealed by PCR amplification of amoA gene in a polyacrylamide transportation system of an oilfield	INTERNATIONAL BIODETERIORATION & BIODEGRADATION			English	Article						Microbial community; amoA gene; 16S rRNA gene; Correlation; Polyacrylamide; Oil field	PARTIALLY HYDROLYZED POLYACRYLAMIDE; 16S RIBOSOMAL-RNA; PRODUCTION WATER; WASTE-WATER; COMMUNITY; TEMPERATURE; NITROGEN; DENITRIFICATION; DEGRADATION; RESERVOIRS	Microorganisms were detected in the hydrolyzed high-molecular-weight polyacrylamide (HPAM) transportation system. The diversity of both general bacteria and ammonia-oxidizing bacteria (AOB) in the online distribution system was further analyzed using 16S rRNA and the functional amoA genes through PCR amplification and clone library methods together with the physicochemical properties and environm…	[Li, Cai-Yun; Hu, Hao; Feng, Jun-Ying; Mbadinga, Serge Maurice; Liu, Jin-Feng; Yang, Shi-Zhong; Mu, Bo-Zhong] East China Univ Sci & Technol, State Key Lab Bioreactor Engn, Shanghai, Peoples R China; [Li, Cai-Yun; Hu, Hao; Feng, Jun-Ying; Mbadinga, Serge Maurice; Liu, Jin-Feng; Yang, Shi-Zhong; Mu, Bo-Zhong] East China Univ Sci & Technol, Inst Appl Chem, Shanghai, Peoples R China; [Gu, Ji-Dong] Un…	East China University of Science & Technology; East China University of Science & Technology; University of Hong Kong	Mu, BZ (corresponding author), East China Univ Sci & Technol, Shanghai 200237, Peoples R China.	bzmu@ecust.edu.cn	Gu, Ji-Dong/AAF-2291-2019; Gu, Ji-Dong/AAO-7851-2020; Mu, Bo-Zhong/F-4704-2017; Mbadinga, Serge Maurice/I-3789-2017	Mu, Bo-Zhong/0000-0002-9564-4970;	National Natural Science Foundation of China [41530318]; Shanghai Fundamental Research Project [15JC1401400]	National Natural Science Foundation of China(National Natural Science Foundation of China (NSFC)); Shanghai Fundamental Research Project	This work was supported by the National Natural Science Foundation of China (Grant No. 41530318) and Shanghai Fundamental Research Project (15JC1401400).		73	3	5	2	36	ELSEVIER SCI LTD	OXFORD	THE BOULEVARD, LANGFORD LANE, KIDLINGTON, OXFORD OX5 1GB, OXON, ENGLAND	0964-8305	1879-0208		INT BIODETER BIODEGR	Int. Biodeterior. Biodegrad.	NOV	2016	115
J	Guo, H; Yao, J; Cai, MM; Qian, YG; Guo, Y; Richnow, HH; Blake, RE; Doni, S; Ceccanti, B				Guo, Huan; Yao, Jun; Cai, Minmin; Qian, Yiguang; Guo, Yue; Richnow, Hans H.; Blake, Ruth E.; Doni, Serena; Ceccanti, Brunello			Effects of petroleum contamination on soil microbial numbers, metabolic activity and urease activity	CHEMOSPHERE			English	Article						Total petroleum hydrocarbons; Soil microbial activity; Microbial population; Microcalorimetry; Urease activity	BIOREMEDIATION; HEAT; BIOMASS; GROWTH	The influence of petroleum contamination on soil microbial activities was investigated in 13 soil samples from sites around an injection water well (Iw-1, 2, 3, 4) (total petroleum hydrocarbons (TPH): 7.5-78 mg kg(-1)), an oil production well (Op-1, 2, 3, 4, 5) (TPH: 149-1110 mg kg(-1)), and an oil spill accident well (Os-1, 2, 3, 4) (TPH: 4500-34600 mg kg(-1)). The growth rate constant (mu) of g…	[Guo, Huan; Yao, Jun; Cai, Minmin; Guo, Yue] Univ Sci & Technol Beijing, Sch Civil & Environm Engn, Beijing 100083, Peoples R China; [Guo, Huan; Yao, Jun; Cai, Minmin; Guo, Yue] Univ Sci & Technol Beijing, Natl Int Cooperat Base Environm & Energy, Beijing 100083, Peoples R China; [Yao, Jun; Qian, Yiguang] China Univ Geosci, Chinese Minist Educ, Key Lab Biogeol & Environm Geol, Wuhan 430074, Peopl…	University of Science & Technology Beijing; University of Science & Technology Beijing; China University of Geosciences; China University of Geosciences; Helmholtz Association; Helmholtz Center for Environmental Research (UFZ); Yale University; Consiglio Nazionale delle Ricerche (CNR); Istituto di Neuroscienze (IN-CNR); Istituto per lo Studio degli Ecosistemi (ISE-CNR)	Yao, J (corresponding author), Univ Sci & Technol Beijing, Sch Civil & Environm Engn, Xueyuan Rd 30, Beijing 100083, Peoples R China.	yaojun@ustb.edu.cn	Richnow, Hans/AAD-9016-2022; Richnow, Hans H./H-8523-2017	Richnow, Hans/0000-0002-6144-4129; Richnow, Hans H./0000-0002-6144-4129; Doni, Serena/0000-0002-9428-9778	National Outstanding Youth Research Foundation of China [40925010]; National Natural Science Foundation of China [40920134003, 40873060]; Chinese Ministry of Science and Technology [2011DFA 00120, 2009DFA92830, 2010DFA92090]	National Outstanding Youth Research Foundation of China; National Natural Science Foundation of China(National Natural Science Foundation of China (NSFC)); Chinese Ministry of Science and Technology(Ministry of Science and Technology, China)	This work is supported in part by grants from the National Outstanding Youth Research Foundation of China (40925010), International Joint Key Project from National Natural Science Foundation of China (40920134003), International Joint Key Project from Chinese Ministry of Science and Technology (2011DFA 00120, 2009DFA92830 and 2010DFA92090), National Natural Science Foundation of China (40873060).		41	101	118	7	68	PERGAMON-ELSEVIER SCIENCE LTD	OXFORD	THE BOULEVARD, LANGFORD LANE, KIDLINGTON, OXFORD OX5 1GB, ENGLAND	0045-6535			CHEMOSPHERE	Chemosphere	JUN	2012	87	11
J	Vigneron, A; Alsop, EB; Lomans, BP; Kyrpides, NC; Head, IM; Tsesmetzis, N				Vigneron, Adrien; Alsop, Eric B.; Lomans, Bartholomeus P.; Kyrpides, Nikos C.; Head, Ian M.; Tsesmetzis, Nicolas			Succession in the petroleum reservoir microbiome through an oil field production lifecycle	ISME JOURNAL			English	Article							SEA HYDROTHERMAL VENT; SP NOV.; SULFATE REDUCTION; SEQUENCING DATA; DIVERSITY; METHANOGENESIS; COMMUNITY; SUBSURFACE; BACTERIUM; BIODEGRADATION	Subsurface petroleum reservoirs are an important component of the deep biosphere where indigenous microorganisms live under extreme conditions and in isolation from the Earth's surface for millions of years. However, unlike the bulk of the deep biosphere, the petroleum reservoir deep biosphere is subject to extreme anthropogenic perturbation, with the introduction of new electron acceptors, donor…	[Vigneron, Adrien; Head, Ian M.] Newcastle Univ, Sch Civil Engn & Geosci, Newcastle Upon Tyne NE1 7RU, Tyne & Wear, England; [Vigneron, Adrien; Alsop, Eric B.; Tsesmetzis, Nicolas] Shell Int Explorat & Prod Inc, Houston, TX USA; [Alsop, Eric B.; Kyrpides, Nikos C.] DOE Joint Genome Inst, Walnut Creek, CA USA; [Lomans, Bartholomeus P.] Shell Global Solut Int BV, Rijswijk, Netherlands	Newcastle University - UK; Royal Dutch Shell; United States Department of Energy (DOE); Royal Dutch Shell	Head, IM (corresponding author), Newcastle Univ, Sch Civil Engn & Geosci, Newcastle Upon Tyne NE1 7RU, Tyne & Wear, England.	ian.head@newcastle.ac.uk	Kyrpides, Nikos C./A-6305-2014	Kyrpides, Nikos C./0000-0002-6131-0462; Head, Ian/0000-0002-5373-162X; Tsesmetzis, Nicolas/0000-0001-5246-0568	Shell Global Solutions International BV; Natural Environment Research Council OILSPORE project [NE/J024325/1]; U.S. Department, of Energy (DOE) Joint Genome Institute, a DOE Office of Science, User Facility [DE-AC02-05CH11231]; NERC [NE/J024325/1] Funding Source: UKRI; Natural Environment Research Council [NE/J024325/1] Funding Source: researchfish	Shell Global Solutions International BV; Natural Environment Research Council OILSPORE project; U.S. Department, of Energy (DOE) Joint Genome Institute, a DOE Office of Science, User Facility(United States Department of Energy (DOE)); NERC(UK Research & Innovation (UKRI)Natural Environment Research Council (NERC)); Natural Environment Research Council(UK Research & Innovation (UKRI)Natural Enviro…	We thank Shell Global Solutions International BV. and Maersk Oil company for valuable technical support. This work was funded by Shell Global Solutions International BV and the Natural Environment Research Council OILSPORE project (NE/J024325/1) and was also supported by the U.S. Department, of Energy (DOE) Joint Genome Institute, a DOE Office of Science, User Facility, under contract no. DE-AC02…		54	86	89	1	45	NATURE PUBLISHING GROUP	LONDON	MACMILLAN BUILDING, 4 CRINAN ST, LONDON N1 9XW, ENGLAND	1751-7362	1751-7370		ISME J	ISME J.	SEP	2017	11	9
J	van der Kraan, GM; Bruining, J; Lomans, BP; van Loosdrecht, MCM; Muyzer, G				van der Kraan, Geert M.; Bruining, Johannes; Lomans, Bart P.; van Loosdrecht, Mark C. M.; Muyzer, Gerard			Microbial diversity of an oil-water processing site and its associated oil field: the possible role of microorganisms as information carriers from oil-associated environments	FEMS MICROBIOLOGY ECOLOGY			English	Article						DGGE; MEOR; petroleum microbiology; subsurface microbiology	16S RIBOSOMAL-RNA; SULFATE-REDUCING BACTERIUM; GRADIENT GEL-ELECTROPHORESIS; THERMOPHILA SP-NOV.; COMMUNITY STRUCTURE; MARINE BACTERIUM; DEEP-SUBSURFACE; GEN. NOV.; SEA; MARINOBACTERIUM	The phylogenetic diversity of Bacteria and Archaea in water retrieved from a Dutch oil field and units of the associated oil-water separation site were determined using two culture-independent methods. Denaturing gradient gel electrophoresis of PCR-amplified 16S rRNA gene fragments was used to scan the microbial diversity in (1) the oil-water emulsion produced, (2) two different oil-water separat…	[van der Kraan, Geert M.; van Loosdrecht, Mark C. M.; Muyzer, Gerard] Delft Univ Technol, Dept Biotechnol, NL-2628 BC Delft, Netherlands; [Bruining, Johannes] Delft Univ Technol, Dept Geotechnol, NL-2628 BC Delft, Netherlands; [Lomans, Bart P.] Shell Int Explorat & Prod BV, Rijswijk, Netherlands	Delft University of Technology; Delft University of Technology; Royal Dutch Shell	van der Kraan, GM (corresponding author), Delft Univ Technol, Dept Biotechnol, Julianalaan 67, NL-2628 BC Delft, Netherlands.	g.m.vanderkraan@tudelft.nl	Muyzer, Gerard/ABE-5834-2020; van Loosdrecht, Mark/AAA-9997-2019; van Loosdrecht, Mark C.M./B-2738-2009; Muyzer, Gerard/A-3161-2013	Muyzer, Gerard/0000-0002-2422-0732; van Loosdrecht, Mark C.M./0000-0003-0658-4775;					53	45	46	0	36	WILEY-BLACKWELL	HOBOKEN	111 RIVER ST, HOBOKEN 07030-5774, NJ USA	0168-6496	1574-6941		FEMS MICROBIOL ECOL	FEMS Microbiol. Ecol.	MAR	2010	71	3
J	Wang, HH; Kuang, SP; Lang, QL; Wang, L				Wang, Huihui; Kuang, Shaoping; Lang, Qiaolin; Wang, Lei			Bacterial community structure of aged oil sludge contaminated soil revealed by illumina high-throughput sequencing in East China	WORLD JOURNAL OF MICROBIOLOGY & BIOTECHNOLOGY			English	Article						High throughput sequencing; Bacterial diversity; Aged oil sludge; Soil	POLYCYCLIC AROMATIC-HYDROCARBONS; MICROBIAL COMMUNITY; PETROLEUM-HYDROCARBONS; PHYLOGENETIC DIVERSITY; ORGANIC POLLUTANTS; BIOREMEDIATION; BIOAUGMENTATION; BIODEGRADATION; BIOSTIMULATION; INDUSTRY	Screening of the dominant or core oil resistant bacteria in Aged Oil Sludge (AOS) contaminated soil in Daqing and Shengli oilfields (DQ and SL) in China was investigated through High-Throughput Sequencing method. Enhanced total organic carbon (TOC, 12.53 to 28.35 g/kg in DQ and 3.07 to 4.97 g/kg in SL) and total petroleum hydrocarbons (TPHs, 21 to 2837 mg/mg in DQ and 13 to 1558 mg/kg in SL) were…	[Wang, Huihui; Kuang, Shaoping; Lang, Qiaolin] Qingdao Univ Sci & Technol, Coll Environm & Safety Engn, Qingdao 266042, Shandong, Peoples R China; [Wang, Lei] Qingdao Univ Sci & Technol, Coll Chem & Mol Engn, Key Lab Opt Elect Sensing & Analyt Chem Life Sci, MOE, Qingdao 266042, Shandong, Peoples R China	Qingdao University of Science & Technology; Qingdao University of Science & Technology	Kuang, SP (corresponding author), Qingdao Univ Sci & Technol, Coll Environm & Safety Engn, Qingdao 266042, Shandong, Peoples R China.	kuang1009@126.com	wang, hui/GRS-4730-2022; wang, huimin/HDM-8421-2022	Wang, Lei/0000-0001-7275-4846	National Natural Science Foundation of China [41673112]; Open Research Fund Program of Shandong Provincial Key Laboratory of EcoEnvironmental Science for Yellow River Delta (Binzhou University) [2015KFJJ01]	National Natural Science Foundation of China(National Natural Science Foundation of China (NSFC)); Open Research Fund Program of Shandong Provincial Key Laboratory of EcoEnvironmental Science for Yellow River Delta (Binzhou University)	This research is joint supported by National Natural Science Foundation of China (No.41673112) and Open Research Fund Program of Shandong Provincial Key Laboratory of EcoEnvironmental Science for Yellow River Delta (Binzhou University) (2015KFJJ01).		63	1	1	7	24	SPRINGER	DORDRECHT	VAN GODEWIJCKSTRAAT 30, 3311 GZ DORDRECHT, NETHERLANDS	0959-3993	1573-0972		WORLD J MICROB BIOT	World J. Microbiol. Biotechnol.	NOV	2021	37	11
[truncated: 531 more rows]
[truncated: 21 more columns]
