# Supplementary material for: Metabolically Active Microbial Communities in Oilfields: A Systematic Review and Synthesis of RNA Preservation, Extraction, and Sequencing Methods
Source: MDPI journal article supplement (doi:10.3390/applmicrobiol3040079), 2023-10-06
Supplement: s1 [file s1 › Table S5 - Included studies.pdf]

**Supplementary Table S5. References, title and DOI of the studies included in the present systematic review.**

| Reference                                           | Title of articles                                                                                                                                                                                | DOI                             |
|-----------------------------------------------------|--------------------------------------------------------------------------------------------------------------------------------------------------------------------------------------------------|---------------------------------|
| 1 Shestakova et al. (2011) <sup>[15]</sup>          | Characterization of the Aerobic Hydrocarbon Oxidizing Enrichments from a High Temperature Petroleum Reservoir by Comparative Analysis of DNA and RNA Derived Clone Libraries                     | 10.1134/s0026261711010140       |
| 2 Zapata-Penãsco et al. (2016) <sup>[4]</sup>       | Bisulfite reductase gene expression of thermophilic sulphate-reducing bacteria from saline connate water of oil reservoirs with high temperature                                                 | 10.1016/j.ibiod.2015.05.029     |
| 3 Nazina et al. (2017) <sup>[3]</sup>               | Diversity of Metabolically Active Bacteria in Water-Flooded High-Temperature Heavy Oil Reservoir                                                                                                 | 10.3389/fmicb.2017.00707        |
| 4 Li et al. (2017) <sup>[17]</sup>                  | Diversity and Composition of Sulfate-Reducing Microbial Communities Based on Genomic DNA and RNA Transcription in Production Water of High Temperature and Corrosive Oil Reservoir               | 10.3389/fmicb.2017.01011        |
| 5 Liu et al. (2018) <sup>[16]</sup>                 | Metabolic capability and in situ activity of microorganisms in an oil reservoir                                                                                                                  | 10.1186/s40168-017-0392-1       |
| 6 Salgar-Chaparro and Machuca (2019) <sup>[1]</sup> | Complementary DNA/RNA-based profiling: characterisation of corrosive microbial communities and their functional profiles in an oil production facility                                           | 10.3389/fmicb.2019.02587        |
| 7 Zheng et al (2019) <sup>[19]</sup>                | Effect of Reservoir Salinity between Bioacid and Carbonate Rock Based on Biometabolic Analysis                                                                                                   | 10.1021/acs.energyfuels.9b01522 |
| 8 Liu et al. (2020) <sup>[35]</sup>                 | Anaerobic Degradation of Paraffins by Thermophilic Actinobacteria under Methanogenic Conditions                                                                                                  | 10.1021/acs.est.0c02071         |
| 9 Liu et al. (2020) <sup>[48]</sup>                 | Dominance of Pseudomonas in bacterial community and inhibition of fumarate addition pathway by injection of nutrients in oil reservoir revealed by functional gene and their transcript analyses | 10.1016/j.ibiod.2020.105039     |
| 10 Liu et al. (2020) <sup>[47]</sup>                | Genomic and transcriptomic evidence supports methane metabolism in Archaeoglobi                                                                                                                  | 10.1128/msystems.00651-19       |

|    |                                               |                                                                                                                                                                                                                             |                                 |
|----|-----------------------------------------------|-----------------------------------------------------------------------------------------------------------------------------------------------------------------------------------------------------------------------------|---------------------------------|
| 11 | Zhou et al. (2020) <sup>[22]</sup>            | Microbial community composition and diversity in production water of a high-temperature offshore oil reservoir assessed by DNA- and RNA-based analyses                                                                      | 10.1016/j.ibiod.2020.104970     |
| 12 | Liu et al. (2020) <sup>[49]</sup>             | Simultaneous detection of transcribed functional <i>assA</i> gene and the corresponding metabolites of linear alkanes (C4, C5, and C7) in production water of a low-temperature oil reservoir                               | 10.1016/j.scitotenv.2020.141290 |
| 13 | Salgar-Chaparro et al. (2020) <sup>[43]</sup> | Microbiologically influenced corrosion as a function of environmental conditions: A laboratory study using oilfield multispecies biofilms                                                                                   | 10.1016/j.corsci.2020.108595    |
| 14 | Salgar-Chaparro et al. (2020) <sup>[44]</sup> | Nutrient Level Determines Biofilm Characteristics and Subsequent Impact on Microbial Corrosion and Biocide Effectiveness                                                                                                    | 10.1128/aem.02885-19            |
| 15 | Alhefeiti et al. (2021) <sup>[13]</sup>       | Bioremediation of various aromatic and emerging pollutants by <i>Bacillus cereus</i> sp. isolated from petroleum sludge                                                                                                     | 10.2166/wst.2021.065            |
| 16 | Zhou et al. (2021) <sup>[45]</sup>            | Dominant and Active Methanogens in the Production Waters From a High-Temperature Petroleum Reservoir by DNA- and RNA-Based Analysis                                                                                         | 10.1080/01490451.2020.1822958   |
| 17 | Albahri et al (2021) <sup>[18]</sup>          | Investigating the mechanism of microbiologically influenced corrosion of carbon steel using X-ray micro-computed tomography                                                                                                 | 10.1007/s10853-021-06112-9      |
| 18 | Su et al. (2022) <sup>[20]</sup>              | Genetic and Comparative Genome Analysis of <i>Exiguobacterium aurantiacum</i> SW-20, a Petroleum-Degrading Bacteria with Salt Tolerance and Heavy Metal-Tolerance Isolated from Produced Water of Changqing Oilfield, China | 10.3390/microorganisms10010066  |
| 19 | Zhou et al. (2022) <sup>[14]</sup>            | Non-syntrophic methanogenic hydrocarbon degradation by an archaeal species                                                                                                                                                  | 10.1038/s41586-021-04235-2      |
| 20 | Prajapat et al. (2023) <sup>[46]</sup>        | Control of reservoir souring by incomplete nitrate reduction in Indian oil fields                                                                                                                                           | 10.1016/j.biteb.2022.101302     |

---
