# Supplementary material for: Metabolically Active Microbial Communities in Oilfields: A Systematic Review and Synthesis of RNA Preservation, Extraction, and Sequencing Methods
Source: MDPI journal article supplement (doi:10.3390/applmicrobiol3040079), 2023-10-06
Supplement: s1 [file s1 › Table S6. Composition of the metabolically active microorganisms.xlsx]

## Sheet: 16S_Phylum (Sample)
Taxon	IW	ND	PW
Candidatus Verstraetearchaeota	0	0	0.157978
Crenarchaeota	0	0	0.315956
Euryarchaeota	0	33.3333	11.3744
Nanoarchaeota	0	0	0.631912
Thaumarchaeota	0	0	0.473934
Actinobacteria	0	0	2.05371
Atribacterota	0	0	0.157978
Bacteroidetes	3.84615	0	5.52923
Chloroflexi	3.84615	0	0
Cyanobacteria	0	0	0.157978
Deferribacteres	7.69231	0	1.73776
Deinococcus-Thermus	0	0	0.315956
Elusimicrobia	3.84615	0	0
Firmicutes	11.5385	33.3333	7.26698
Fusobacteria	0	0	0.157978
Ignavibacteriae	3.84615	0	1.10585
Nitrospirae	0	0	0.789889
Proteobacteria	65.3846	0	57.03
Spirochaetes	0	0	2.05371
Synergistetes	0	33.3333	2.8436
Thermodesulfobacteria	0	0	1.4218
Thermotogae	0	0	4.42338

## Sheet: 16S_Genus (Sample)
Taxon	IW	ND	PW
Archaeoglobus	0	0	0.947867
Candidatus Caldiarchaeum	0	0	0.315956
Candidatus Methanofastidiosum	0	0	0.315956
Candidatus Methanomethylicus	0	0	0.157978
Ignisphaera	0	0	0.157978
Methanobacterium	0	0	1.10585
Methanocalculus	0	0	0.947867
Methanococcoides	0	0	0.631912
Methanocorpusculum	0	0	0.157978
Methanoculleus	0	0	0.947867
Methanofollis	0	0	0.473934
Methanolinea	0	0	0.315956
Methanolobus	0	0	0.947867
Methanosphaera	0	0	0.157978
Methanothermobacter	0	33.3333	0.947867
Methanothermococcus	0	0	0.157978
Methanothrix	0	0	1.26382
Methermicoccus	0	0	0.947867
Nanoarchaeum	0	0	0.631912
Nitrosopumilus	0	0	0.157978
Thermococcus	0	0	1.10585
Thermofilum	0	0	0.157978
Acetomicrobium	0	0	0.631912
Achromobacter	0	0	1.26382
Acidovorax	0	0	0.315956
Acinetobacter	3.84615	0	1.4218
Alcaligenes	0	0	0.157978
Alcanivorax	0	0	1.10585
Algoriphagus	0	0	0.157978
Alloprevotella	0	0	0.157978
Allorhizobium	0	0	0.315956
Aminobacterium	0	0	0.789889
Anaerophaga	0	0	0.473934
Aquabacterium	0	0	0.631912
Arcobacter	0	0	0.947867
Aromatoleum	3.84615	0	0
Arthrobacter	0	0	0.157978
Azoarcus	0	0	0.473934
Azospira	0	0	0.157978
Azospirillum	0	0	0.157978
Bacillus	0	0	0.947867
Bellilinea	3.84615	0	0
Bergeyella	0	0	0.157978
Bosea	0	0	0.631912
Bradyrhizobium	0	0	0.157978
Brevibacterium	0	0	0.157978
Brevundimonas	0	0	1.10585
Caldimicrobium	0	0	0.473934
Calditerrivibrio	3.84615	0	0
Candidatus Caldatribacterium	0	0	0.157978
Caulobacter	0	0	0.631912
Chitinophaga	0	0	0.157978
Chryseobacterium	0	0	0.157978
Citrobacter	0	0	0.157978
Clostridium	0	0	0.157978
Comamonas	0	0	0.315956
Corynebacterium	0	0	0.157978
Cronobacter	0	0	0.157978
Cryptanaerobacter	0	0	0.157978
Cutibacterium	0	0	0.157978
Dechloromonas	0	0	0.631912
Deferribacter	0	0	0.947867
Deinococcus	0	0	0.157978
Delftia	0	0	0.315956
Denitromonas	3.84615	0	0
Desulfarculus	0	0	0.947867
Desulfatitalea	3.84615	0	0.789889
Desulfitobacterium	0	0	0.315956
Desulfobotulus	0	0	0.947867
Desulfobulbus	0	0	0.473934
Desulfocarbo	0	0	0.315956
Desulfocella	0	0	0.631912
Desulfofustis	0	0	0.473934
Desulfoglaeba	0	0	0.947867
Desulfomicrobium	0	0	0.631912
Desulfonauticus	0	0	0.315956
Desulfotignum	0	0	0.947867
Desulfotomaculum	0	0	0.157978
Desulfovibrio	0	0	1.4218
Desulfurivibrio	3.84615	0	0.947867
Desulfuromonas	3.84615	0	0.947867
Dethiosulfatibacter	0	0	0.631912
Devosia	0	0	0.157978
Elusimicrobium	3.84615	0	0
Escherichia	3.84615	0	0.315956
Exiguobacterium	0	0	0.157978
Flavobacterium	0	0	0.315956
Flexistipes	3.84615	0	0
Fluviicola	3.84615	0	0
Fontibacter	0	0	0.789889
Fusobacterium	0	0	0.157978
Geoalkalibacter	0	0	0.157978
Geobacillus	3.84615	0	0.157978
Geobacter	3.84615	0	0
Geotoga	0	0	0.947867
Geovibrio	0	0	0.789889
Gordonia	0	0	0.157978
Haemophilus	0	0	0.157978
Halocella	0	0	0.157978
Halomonas	0	0	1.10585
Hydrogenophilus	0	0	0.315956
Hymenobacter	0	0	0.157978
Hyphomonas	0	0	0.947867
Ignavibacterium	0	0	0.947867
Janthinobacterium	0	0	0.157978
Kocuria	0	0	0.157978
Kosmotoga	0	0	0.789889
Lachnoanaerobaculum	0	0	0.157978
Lactobacillus	0	0	0.315956
Lactococcus	3.84615	0	0
Legionella	0	0	0.631912
Leuconostoc	0	0	0.157978
Marinobacter	0	0	1.4218
Marinobacterium	0	0	0.947867
Massilia	0	0	0.315956
Melioribacter	3.84615	0	0.157978
Mesotoga	0	0	0.473934
Methylobacterium	0	0	0.789889
Methylophilus	0	0	0.157978
Microbacterium	0	0	0.157978
Micrococcus	0	0	0.157978
Moorella	0	0	0.157978
Mucilaginibacter	0	0	0.157978
Neisseria	0	0	0.157978
Neorhizobium	0	0	0.315956
Nitrincola	0	0	0.947867
Novosphingobium	0	0	0.473934
Oceanibaculum	0	0	0.947867
Paludibacter	0	0	0.631912
Paracoccus	0	0	0.947867
Pararhizobium	0	0	0.315956
Pedobacter	0	0	0.157978
Pelobacter	0	0	1.26382
Pelomonas	0	0	0.157978
Pelotomaculum	0	0	0.631912
Petrotoga	0	0	0.473934
Phenylobacterium	0	0	0.947867
Pleurocapsa	0	0	0.157978
Prevotella	0	0	0.157978
Prolixibacter	0	0	0.157978
Propionibacterium	0	0	0.473934
Proteiniphilum	0	0	1.4218
Pseudomonas	7.69231	0	1.89573
Pseudothermotoga	0	0	0.157978
Psychrobacter	0	0	0.157978
Ralstonia	0	0	0.473934
Rhizobium	0	0	0.947867
Rhodococcus	0	0	0.157978
Rhodovulum	0	0	0.947867
Roseomonas	0	0	0.631912
Roseovarius	0	0	0.947867
Rubellimicrobium	0	0	0.315956
Saccharofermentans	0	0	0.315956
Shewanella	0	0	0.157978
Shigella	0	0	0.157978
Simplicispira	0	0	0.157978
Smithella	3.84615	0	1.10585
Sphaerochaeta	0	0	1.10585
Sphingobium	0	0	0.473934
Sphingomonas	3.84615	0	0.789889
Sphingopyxis	0	0	0.157978
Spirochaeta	0	0	0.947867
Spirosoma	0	0	0.157978
Staphylococcus	0	0	0.315956
Stappia	0	0	0.947867
Stenotrophomonas	0	0	0.947867
Streptococcus	0	0	0.473934
Subdoligranulum	0	0	0.157978
Sulfurimonas	0	0	0.947867
Syntrophobacter	0	0	0.947867
Syntrophorhabdus	0	0	0.947867
Syntrophothermus	0	0	0.315956
Syntrophus	0	0	0.157978
Tannerella	0	0	0.157978
Tepidimonas	3.84615	0	0
Tepidiphilus	3.84615	0	1.26382
Thalassolituus	0	0	0.947867
Thalassospira	0	0	0.473934
Thauera	3.84615	0	0.789889
Thermacetogenium	0	0	0.947867
Thermoanaerobacter	0	33.3333	0.157978
Thermoanaerobacterium	3.84615	0	0
Thermodesulfobacterium	0	0	0.947867
Thermodesulfomicrobium	3.84615	0	0
Thermodesulforhabdus	0	0	0.947867
Thermodesulfovibrio	0	0	0.789889
Thermosipho	0	0	0.789889
Thermosyntropha	0	0	0.157978
Thermotoga	0	0	0.789889
Thermovirga	0	33.3333	1.4218
Thermus	0	0	0.157978
Thioalbus	0	0	0.315956
Thiobacillus	0	0	0.315956
Thiofaba	3.84615	0	0
Thiomicrospira	0	0	0.789889
Tistrella	0	0	0.947867
Virgibacillus	0	0	0.157978
Williamsia	0	0	0.157978
Zoogloea	0	0	0.157978

## Sheet: Meta_Phylum (Articles)
Phylum	PW	PW.HDM	OS.MET.HDM
Abditibacteriota	0	0.000158673	4.28963e-05
Acidobacteria	0.00160855	0.125729	0.0305063
Actinobacteria	1.33021	27.4799	1.17376
Aquificae	9.67547e-05	0.000479318	0.00206296
Armatimonadetes	0.0533361	0.110049	0.154998
Atribacterota	0.0550535	0.247551	3.31243
Bacteroidetes	0.028325	0.354079	4.15824
Balneolaeota	0	1.64941e-05	0.0002987
Caldiserica	0.00430559	0.0651064	0.332546
Calditrichaeota	0.000157226	0.0270378	0.0119366
Candidatus Abawacabacteria	0	0	5.31284e-05
Candidatus Absconditabacteria	0	0	0.000184178
Candidatus Abyssubacteria	0	0	9.44505e-06
Candidatus Aenigmarchaeota	0.000374925	0.000796334	0.0104474
Candidatus Aerophobetes	0.0450998	0.0180646	0.0340285
Candidatus Altiarchaeota	4.83774e-05	0.000107212	0.00233568
Candidatus Amesbacteria	0	0	0.000103896
Candidatus Aminicenantes	0.290724	1.66025	0.566931
Candidatus Andersenbacteria	3.6283e-05	5.27811e-06	5.27348e-05
Candidatus Auribacterota	0	0	2.32191e-05
Candidatus Azambacteria	0	1.31953e-06	0.000110979
Candidatus Bathyarchaeota	0.000544245	0.0509944	0.0241553
Candidatus Beckwithbacteria	0	0	3.89608e-05
Candidatus Berkelbacteria	0	1.97929e-06	0.00148248
Candidatus Binatota	0	0.000154055	3.93544e-05
Candidatus Bipolaricaulota	0.554816	4.03544	4.18
Candidatus Blackburnbacteria	0.000217698	1.64941e-05	1.57417e-05
Candidatus Brockarchaeota	0	4.28846e-06	0.000222352
Candidatus Buchananbacteria	0	0	3.93544e-06
Candidatus Calescamantes	0	6.59763e-07	0.00086737
Candidatus Chisholmbacteria	0	9.89645e-07	5.50961e-06
Candidatus Cloacimonetes	0.067426	0.00279575	0.308136
Candidatus Coatesbacteria	0	1.64941e-06	0.000266036
Candidatus Collierbacteria	0	0	6.06057e-05
Candidatus Colwellbacteria	0	2.63905e-06	6.37541e-05
Candidatus Cryosericota	0	0	3.03029e-05
Candidatus Curtissbacteria	0	0	7.47733e-06
Candidatus Dadabacteria	0.000108849	0.00383553	0.016931
Candidatus Daviesbacteria	0	0	0.000155843
Candidatus Delongbacteria	0	7.2574e-06	0.000120424
Candidatus Desantisbacteria	0	4.22248e-05	0.000293584
Candidatus Diapherotrites	2.41887e-05	2.70503e-05	0.00082959
Candidatus Dormibacteraeota	0	5.27811e-06	2.59739e-05
Candidatus Doudnabacteria	0	0	8.46119e-05
Candidatus Edwardsbacteria	0	0	2.36126e-06
Candidatus Eisenbacteria	0	0.000106882	0.000820145
Candidatus Eremiobacteraeota	1.20943e-05	0.000164611	0.00317314
Candidatus Falkowbacteria	0	9.23669e-06	0.00037426
Candidatus Fermentibacteria	0	0.000295904	0.00822939
Candidatus Firestonebacteria	0	0	3.65996e-05
Candidatus Fischerbacteria	0	0	3.54189e-06
Candidatus Fraserbacteria	0	2.37515e-05	1.3774e-05
Candidatus Geothermarchaeota	0	1.02263e-05	1.77095e-05
Candidatus Giovannonibacteria	0	0	0.000104289
Candidatus Glassbacteria	0	1.64941e-06	3.54189e-05
Candidatus Goldbacteria	0	0.00266973	6.2967e-06
Candidatus Gottesmanbacteria	0	2.30917e-06	0.000249507
Candidatus Gracilibacteria	0	4.02456e-05	0.000345925
Candidatus Handelsmanbacteria	0	0	0.000173553
Candidatus Heimdallarchaeota	0	0.000192651	0.00329002
Candidatus Helarchaeota	0	0	5.62767e-05
Candidatus Huberarchaea	0	0	0.000152301
Candidatus Hydrogenedentes	0.00125781	0.00091971	0.146795
Candidatus Hydrothermae	0.00634953	0.00260178	0.390642
Candidatus Hydrothermarchaeota	0	8.24704e-06	2.87287e-05
Candidatus Jacksonbacteria	0	0	2.28255e-05
Candidatus Jorgensenbacteria	0	0	2.12514e-05
Candidatus Kaiserbacteria	0	6.26775e-06	0.000140495
Candidatus Kapabacteria	0	0.00016692	1.14128e-05
Candidatus Kerfeldbacteria	0	0	7.00508e-05
Candidatus Komeilibacteria	0	0	2.2432e-05
Candidatus Korarchaeota	0	0.000150426	0.000811487
Candidatus Krumholzibacteriota	0	5.21213e-05	0.000158205
Candidatus Kryptonia	0	4.28846e-06	0.000258558
Candidatus Kuenenbacteria	0	0	0.000144037
Candidatus Latescibacteria	3.6283e-05	6.00385e-05	0.00299251
Candidatus Levybacteria	0	0	0.000135773
Candidatus Lindowbacteria	0	0	3.14835e-06
Candidatus Liptonbacteria	0	9.23669e-06	6.69024e-06
Candidatus Lloydbacteria	0	0	5.90315e-06
Candidatus Lokiarchaeota	0	0.000119087	0.00873628
Candidatus Magasanikbacteria	0	5.60799e-06	6.96572e-05
Candidatus Margulisbacteria	0	0	7.31991e-05
Candidatus Marinimicrobia	0.0059867	0.000778521	0.0901337
Candidatus Marsarchaeota	0	6.59763e-06	3.65996e-05
Candidatus Mcinerneyibacteriota	4.83774e-05	3.79364e-05	0.00303107
Candidatus Melainabacteria	1.19377	0.0845355	0.000162534
Candidatus Micrarchaeota	1.20943e-05	0.000318006	0.00249979
Candidatus Microgenomates	0	9.26967e-05	0.00268948
Candidatus Moranbacteria	6.04717e-05	6.63062e-05	0.00418455
Candidatus Muirbacteria	0	0	5.19478e-05
Candidatus Nanohaloarchaeota	0	0	3.54189e-06
Candidatus Nealsonbacteria	1.20943e-05	0.00183282	0.00675833
Candidatus Niyogibacteria	0	0	2.36126e-05
Candidatus Nomurabacteria	0	7.91716e-06	0.000857925
Candidatus Odinarchaeota	1.20943e-05	3.36479e-05	0.0256154
Candidatus Omnitrophica	0.000459585	0.0224158	0.0608202
Candidatus Pacebacteria	0	0.000100614	0.00330065
Candidatus Parcubacteria	2.41887e-05	0.00579272	0.0267161
Candidatus Parvarchaeota	0	0	1.21999e-05
Candidatus Peregrinibacteria	0	2.90296e-05	0.00685632
Candidatus Poribacteria	0	0.000851424	0.00126446
Candidatus Portnoybacteria	0	0	0.000207004
Candidatus Raymondbacteria	0	1.35251e-05	3.14835e-06
Candidatus Riflebacteria	0	3.19985e-05	0.000171979
Candidatus Roizmanbacteria	0	3.6287e-06	0.001268
Candidatus Rokubacteria	2.41887e-05	0.000707266	0.00060409
Candidatus Ryanbacteria	0	3.29882e-07	7.39862e-05
Candidatus Saccharibacteria	0	0.00451113	0.00209405
Candidatus Schekmanbacteria	0	0	0.000105863
Candidatus Shapirobacteria	0	0.000240154	0.0399411
Candidatus Spechtbacteria	0	0	2.00707e-05
Candidatus Staskawiczbacteria	0	0	5.50961e-05
Candidatus Sumerlaeota	0.0561178	0.00472522	0.270319
Candidatus Sungbacteria	0	0	1.84966e-05
Candidatus Taylorbacteria	1.20943e-05	4.25547e-05	2.43997e-05
Candidatus Tectomicrobia	0	3.95858e-06	0.000102321
Candidatus Terrybacteria	0	0	4.17156e-05
Candidatus Thermoplasmatota	0.00402742	2.12151	2.95859
Candidatus Thorarchaeota	0	0.000121396	0.0010606
Candidatus Uhrbacteria	0	2.90296e-05	0.000387247
Candidatus Verstraetearchaeota	0.00296311	0.618803	1.51306
Candidatus Vogelbacteria	0	9.23669e-06	3.14835e-06
Candidatus Wildermuthbacteria	0	0	4.72252e-06
Candidatus Woesearchaeota	1.20943e-05	0.000215413	0.0313099
Candidatus Woesebacteria	1.20943e-05	1.61642e-05	0.00451552
Candidatus Wolfebacteria	2.41887e-05	0	0.000200314
Candidatus Woykebacteria	0	0	2.40062e-05
Candidatus Yanofskybacteria	0	9.56657e-06	0.000103896
Candidatus Yonathbacteria	0	0	7.87087e-06
Candidatus Zambryskibacteria	0	0	3.42383e-05
Chlamydiae	0.00305987	0.00824176	0.00125501
Chlorobi	0	4.84926e-05	0.000756391
Chloroflexi	1.2093	3.17607	5.65384
Chrysiogenetes	0	0	8.34313e-05
Coprothermobacterota	0.000266076	0.000403775	0.0803821
Crenarchaeota	0.000725661	0.000883093	0.0106316
Cyanobacteria	0.00157226	0.0107353	0.00710346
Deferribacteres	0.029607	0.00848522	1.71604
Deinococcus-Thermus	0.00208023	0.0600945	0.205276
Dictyoglomi	0.00601089	0.00765655	0.00957138
Elusimicrobia	0	0.00303854	0.00191656
Euryarchaeota	0.938944	45.7708	27.3778
Fibrobacteres	0	0.0014749	0.000673747
Firmicutes	30.1797	4.01233	6.92006
Fusobacteria	0	9.56657e-05	0.00174064
Gemmatimonadetes	0.0547995	0.0045583	0.0068209
Ignavibacteriae	1.20943e-05	0.00601242	0.013811
Kiritimatiellaeota	6.04717e-05	8.11509e-05	0.002048
Lentisphaerae	2.41887e-05	0.000282709	0.0149196
Myxococcota	0	0	6.17864e-05
Nanoarchaeota	6.04717e-05	1.9463e-05	0.00538722
Nitrospinae	0	3.95858e-06	0.000194804
Nitrospirae	0.00593832	0.0159847	0.10942
Planctomycetes	0.0420883	0.0700969	1.00494
Proteobacteria	59.4404	7.91823	19.7419
Rhodothermaeota	0	2.67204e-05	1.84966e-05
Spirochaetes	0.0327031	0.0130993	0.271073
Synergistetes	3.65964	0.651325	9.02364
Tenericutes	3.6283e-05	0.000350994	0.00298739
Thaumarchaeota	0.00027817	0.0989536	0.00865599
Thermodesulfobacteria	0.101726	0.000192321	0.00343878
Thermotogae	0.586987	1.08002	7.84308
Verrucomicrobia	0.000217698	0.0222317	0.00791928

## Sheet: Meta_Genus (Articles)
Genus	PW	PW.HDM	OS.MET.HDM
Abiotrophia	0	0.000254298	0
Acetilactobacillus	0	3.95025e-05	0
Acetivibrio	0.000295315	0	0.00118206
Acetobacter	0	0.0014369	0.000161145
Acetobacterium	0	0.000125914	0.000172155
Acetohalobium	0	0	2.40216e-05
Acetomicrobium	7.55101	2.70433	6.85826
Acetonema	0	1.48134e-05	0
Acholeplasma	0	0	0.000240216
Achromatium	0	0	1.0009e-05
Achromobacter	0.00136919	0.064641	0.013324
Acidaminobacter	0	0	1.0009e-05
Acidaminococcus	0	0.000241953	0
Acidiferrobacter	0	0	1.10099e-05
Acidihalobacter	0	7.40672e-06	0.000470422
Acidimangrovimonas	0	0	7.10638e-05
Acidiphilium	0	0.000187637	4.30386e-05
Acidiplasma	0	0.000330834	0
Acidipropionibacterium	0	0.000636978	3.60323e-05
Acidisphaera	0	0	6.00539e-06
Acidithiobacillus	8.05404e-05	1.48134e-05	0.00090181
Acidothermus	0	0	2.60234e-05
Acidovorax	0.00910106	0.204821	0.00118006
Aciduliprofundum	0	4.44403e-05	0
Acinetobacter	17.3958	0.679562	0.0375597
Actibacterium	0.000134234	0.000298738	0.0154028
Actinoallomurus	0	0	1.80162e-05
Actinomadura	0.000134234	0.00190353	0.000230207
Actinomarinicola	0	0	1.0009e-05
Actinomyces	0.000375855	0.0525038	0.00504253
Actinomycetospora	0	5.4316e-05	3.0027e-06
Actinophytocola	0	0.0018023	0
Actinoplanes	0	0.000790051	3.0027e-05
Actinopolymorpha	0	0	2.50225e-05
Actinotalea	2.68468e-05	0.000960405	7.20647e-05
Acuticoccus	0.00225513	0.00788322	0.12435
Adhaeribacter	0	3.20958e-05	0
Advenella	0	6.91294e-05	1.0009e-05
Aeoliella	0	0	7.00629e-06
Aequoribacter	0	0.000459217	0
Aequorivita	0	0	4.70422e-05
Aeriscardovia	0	1.97513e-05	0
Aerococcus	0	0.00201957	0.000205184
Aeromicrobium	0.000268468	0.00990526	0.0257681
Aeromonas	0.00174504	0.0281381	0.000675606
Aerosticca	0	0	1.0009e-05
Aestuariicella	0	0	0.000216194
Aestuariicoccus	0	0	0.000596536
Aestuariimicrobium	0	7.15983e-05	0
Aestuariivirga	5.36936e-05	0.00272074	4.00359e-05
Aestuariivita	0	0	2.50225e-05
Aestuarium	0	1.72824e-05	5.10458e-05
Afifella	0	7.40672e-06	0.00127414
Afipia	0	0.011436	0.000265238
Agaricicola	0	2.46891e-06	8.00719e-06
Agathobaculum	0	1.97513e-05	0
Aggregatibacter	0	0.000232077	0
Aggregatilinea	0	0.000387619	0.000742667
Agrobacterium	0.000563783	0.0188254	0.00243419
Agrococcus	0	0.000219733	6.20557e-05
Agromyces	0.000644323	0.000503657	0.00437393
Ahrensia	0	0	0.00484635
Akkermansia	0	0.00152579	2.70243e-05
Albibacillus	0	2.46891e-06	0.000405364
Albidovulum	0	4.93782e-06	8.908e-05
Albimonas	0	2.22202e-05	0.000976877
Alcaligenes	0	0.00624634	0.000266239
Alcanivorax	0.000107387	0.00312317	0.00321689
Algibacter	0	0.000103694	0
Algiphilus	5.36936e-05	1.48134e-05	0.000329296
Algisphaera	0	0	6.00539e-06
Algoriphagus	5.36936e-05	0.000229608	7.00629e-06
Aliarcobacter	0.000429549	0.000427121	0.000324291
Alicycliphilus	5.36936e-05	9.87563e-06	7.80701e-05
Alicyclobacillus	0	0.00641669	0.000197177
Aliidiomarina	0.000161081	0.00130605	6.00539e-06
Aliifodinibius	0	0	4.30386e-05
Aliihoeflea	0	2.22202e-05	0.000252226
Aliiroseovarius	0	0	0.000274246
Aliiruegeria	0	0	5.30476e-05
Aliivibrio	0	0	5.00449e-05
Alistipes	0	0.0319625	0.000106095
Aliterella	0	0.000323427	0
Alkalibacter	0	0	0.000295265
Alkalibacterium	0	1.97513e-05	0
Alkalibaculum	0	0	1.20108e-05
Alkaliflexus	0	3.20958e-05	0
Alkalihalobacillus	0.12822	0.0208154	8.00719e-06
Alkalihalophilus	0	0	4.00359e-06
Alkalilacustris	0	7.40672e-06	8.10728e-05
Alkalilimnicola	0	0.000123445	0
Alkaliphilus	0	0	0.000671603
Alkalispirochaeta	0	0	9.60863e-05
Alkanindiges	0	0.000274049	0
Allgaiera	0.00679224	7.40672e-05	3.20288e-05
Allochromatium	0	2.46891e-05	4.9044e-05
Allofustis	0	0	5.20467e-05
Alloprevotella	0	0.000883869	0
Allorhizocola	0	1.48134e-05	0
Allosediminivita	0	4.93782e-06	0.000158142
Alsobacter	0	0	6.00539e-05
Altererythrobacter	0	0.000153072	0
Alteribacter	0	0	4.00359e-06
Altericroceibacterium	0	0	5.20467e-05
Alterinioella	0	2.46891e-06	0.000625562
Alteromonas	0	0	1.60144e-05
Amaricoccus	0	0.00221955	0.000117105
Aminiphilus	0	0.000190106	0.0280702
Aminivibrio	0	4.19714e-05	0.00503552
Aminobacter	0	0.000274049	0.000166149
Aminobacterium	0	4.93782e-06	0.00208988
Aminomonas	0	8.1474e-05	0.000115103
Ammonifex	0.0349277	0.0166034	0.00296066
Amnimonas	0	0.00112829	1.60144e-05
Amorphus	0.00534251	0.00742895	0.259933
Amphiplicatus	0	0	2.0018e-05
Amycolatopsis	0	0.000187637	0.000270243
Amylibacter	0	0	2.30207e-05
Anaerobacterium	0	0	1.0009e-05
Anaerobranca	0	0	6.60593e-05
Anaerobutyricum	0	0.00959171	6.50584e-05
Anaerococcus	0	0.00195784	7.00629e-06
Anaerofilum	0	0.000599945	0
Anaerohalosphaera	0	0	4.70422e-05
Anaerolinea	0	0.000923372	0.00803621
Anaeromyxobacter	0	6.17227e-05	2.30207e-05
Anaerophaga	0	0.000103694	0.000220198
Anaerosalibacter	0	0.000207388	3.60323e-05
Anaerosolibacter	0	0	1.70153e-05
Anaerospora	0	0	1.80162e-05
Anaerosporomusa	0	0.000172824	0
Anaerotalea	0	0	2.0018e-06
Anaerotignum	0	0	6.00539e-06
Anaerotruncus	0	5.92538e-05	0.00015614
Anaerovorax	0	0	5.10458e-05
Anatilimnocola	0	0.000195044	0
Ancrocorticia	0	0.0149937	0
Ancylobacter	0.000268468	0.000560442	0.000466419
Anderseniella	0	0	4.9044e-05
Andreesenia	0	0	1.80162e-05
Aneurinibacillus	0.133831	0.0149468	0.000750674
Angulomicrobium	0	0	3.50314e-05
Anoxybacillus	0	0.0561232	0.000399359
Anoxybacter	0.000161081	7.90051e-05	0.000988888
Antarcticimicrobium	0.00131549	0.000935716	0.155822
Antarctobacter	0	0	1.30117e-05
Aquabacter	0	0	0.0049034
Aquabacterium	0.000161081	0.0285184	9.10818e-05
Aquamicrobium	0	9.38185e-05	0.000108097
Aquibium	0	1.23445e-05	0.0007797
Aquicella	0	0	7.00629e-06
Aquicoccus	0	0	1.40126e-05
Aquiluna	0	1.72824e-05	0
Aquimarina	0	0	0.000360323
Aquincola	0	5.67849e-05	2.0018e-06
Aquirhabdus	0	0.000185168	0
Aquirufa	0	1.97513e-05	0
Aquisalimonas	0	0	4.50404e-05
Aquisalinus	0	0	0.000239215
Aquisediminimonas	0	9.38185e-05	0
Aquisphaera	0	1.23445e-05	6.00539e-06
Aquitalea	0	0.00255038	0
Arachnia	0	0.00395766	0
Arcanobacterium	0	1.97513e-05	3.70332e-05
Archaeoglobus	0.147308	0.00468599	0.0162246
Archangium	0	0	9.00809e-06
Arcobacter	0	0.000775237	5.00449e-05
Ardenticatena	0	0	3.30297e-05
Arenibacter	0	0.000328365	0
Arenibacterium	0	0	1.30117e-05
Arenibaculum	0	0	8.00719e-06
Arenicella	0	0	1.0009e-05
Arenimonas	0	0	6.00539e-06
Arhodomonas	5.36936e-05	9.87563e-06	0.000424381
Aromatoleum	0.00220144	0	0.000143128
Arsenicibacter	0	0	1.60144e-05
Arsenicicoccus	0	6.66605e-05	6.00539e-06
Arthrobacter	0.000536936	0.00948308	0.000271243
Asaia	0	0	1.20108e-05
Asinibacterium	0	0.000511064	0
Asticcacaulis	0	0.00209857	1.0009e-05
Athalassotoga	0	0	2.10189e-05
Atlantibacter	0	0.000370336	0
Atopobium	0	0.00177515	0
Atribacter	0	9.87563e-06	0.00406865
Aurantiacibacter	0	0.000192575	0.000148133
Aurantimicrobium	0.00271153	0.0012147	0.000135121
Aurantimonas	0	0	0.00059053
Aureibaculum	0	0	8.00719e-06
Aureimonas	0	0.0199488	0.000155139
Azoarcus	0.000134234	0.000308614	0.000302271
Azohydromonas	0	0.0377348	0
Azorhizobium	0	4.93782e-06	0.000726652
Azospira	0	0.00235287	1.0009e-06
Azospirillum	0.000349008	0.00405642	0.00564607
Azotobacter	0.000268468	0.00500941	0.000191172
Azovibrio	0	0.000153072	0
Bacilliculturomica	0	0.000886338	0
Bacillus	15.3259	0.615395	0.00364527
Bacterioplanes	5.36936e-05	0	3.10279e-05
Bacteriovorax	0	0.000688825	0
Bacteroides	0.00150342	0.16755	0.0032269
Baekduia	0	3.45647e-05	0
Balneola	0	0	2.10189e-05
Barnesiella	5.36936e-05	0.0081869	0
Barrientosiimonas	0	0.000128383	6.00539e-06
Bartonella	8.05404e-05	7.65362e-05	0.000112101
Bauldia	0	0.00129371	0.000528474
Bdellovibrio	0	0.00346141	0
Beduini	0	3.95025e-05	0
Beggiatoa	0	0	1.50135e-05
Beijerinckia	0	0.000148134	0
Bellilinea	0	0.00868809	9.9089e-05
Belnapia	0	0.000182699	0
Bergeyella	0	0.000133321	0
Beutenbergia	0	0	4.40395e-05
Bifidobacterium	0	0.00689566	1.40126e-05
Bilophila	0	0.00203438	0
Biomaibacter	0	0.000785113	0.00275547
Blastochloris	0	0	4.40395e-05
Blastococcus	0.000134234	0.000323427	0.000530476
Blastomonas	0	0.000412308	0
Blastopirellula	0	3.95025e-05	0.00349814
Blautia	0	0.00424405	0
Bordetella	0.00263099	0.00899423	0.000283254
Borreliella	0	2.46891e-06	2.70243e-05
Bosea	8.05404e-05	0.0237657	0.000614552
Boseongicola	0	0	0.000181163
Brachybacterium	0	0.00842392	0.000177159
Brachymonas	2.68468e-05	0.00115792	5.30476e-05
Brachyspira	0	0	8.00719e-06
Bradymonas	2.68468e-05	1.97513e-05	0.00177659
Bradyrhizobium	0.199552	2.72179	0.0308027
Branchiibius	5.36936e-05	0.0114286	1.70153e-05
Bremerella	0	0	0.000416374
Breoghania	0	0.00326883	0.000628564
Brevefilum	5.36936e-05	0.0115915	0.0142928
Brevibacillus	0.322994	0.00478968	0.000976877
Brevibacterium	0	0.0978799	0.000282253
Brevilactibacter	0	0.000106163	0
Brevirhabdus	0	0	6.60593e-05
Brevundimonas	0.0304174	0.389883	0.0041207
Brooklawnia	0	1.48134e-05	5.10458e-05
Brucella	0.000268468	0.00252816	0.000644579
Burkholderia	0.327101	3.13198	0.0142148
Butyricicoccus	0	1.48134e-05	2.80252e-05
Butyricimonas	0	0.000757955	0
Bythopirellula	0	9.87563e-06	0
Caballeronia	0	0.00431071	2.40216e-05
Caenibacillus	0	0	8.00719e-06
Caenispirillum	0.000402702	0.00145912	0.00424281
Caldalkalibacillus	0	0.00184427	4.50404e-05
Caldanaerobacter	0.000295315	0.00200722	0.0142258
Caldanaerobius	0.000295315	0.00319477	0.00250525
Caldanaerovirga	0.00190612	0.00027158	2.30207e-05
Calderihabitans	0.000483242	0.00194303	0.00241817
Caldibacillus	0	0.000241953	1.20108e-05
Caldicellulosiruptor	0.000349008	0.00022714	0.000603542
Caldicoprobacter	0.000161081	0.000128383	0.00193974
Caldilinea	0	0.00151344	0.000123111
Caldimicrobium	0.0111951	2.7158e-05	0.000207186
Caldimonas	0	0	0.000140126
Caldisalinibacter	0	0	0.000237213
Caldisericum	0.000107387	0.000212326	0.00049044
Calditerricola	0.000483242	0.000155541	6.00539e-06
Calditerrivibrio	0.000375855	0.000224671	0.00056851
Caldithrix	0	0.000116039	0.00150535
Calidifontibacter	0	0.00261457	2.0018e-06
Calidifontimicrobium	0	0	2.20198e-05
Calidithermus	0	0.000382681	0.000287258
Caloramator	0	0	0.00147833
Caloranaerobacter	0	2.22202e-05	0.000462415
Calorimonas	0	0	0.00176859
Calothrix	0	9.62874e-05	0
Camelimonas	0	0.000170355	0
Caminicella	0	0	2.50225e-05
Campylobacter	0.00118126	0.0100583	0.000464417
Candidatus Accumulibacter	0	0.00388853	0.000107096
Candidatus Acetothermum	0	0.00141962	1.0009e-05
Candidatus Aegiribacteria	0	0.000357992	0.002227
Candidatus Aerophobus	0	0	7.30656e-05
Candidatus Altiarchaeum	0	0	9.50854e-05
Candidatus Anammoximicrobium	0	0	0.000129116
Candidatus Anoxymicrobium	0	0	1.20108e-05
Candidatus Argoarchaeum	0	0	0.000116104
Candidatus Avelusimicrobium	0	0.0015801	0
Candidatus Avoscillospira	0	0.000103694	0
Candidatus Bipolaricaulis	0.000107387	0.241617	0.0578289
Candidatus Borkfalkia	0	0.000644385	0
Candidatus Brocadia	0	0.0008814	0.000463416
Candidatus Caccalectryoclostridium	0	0.000133321	0
Candidatus Caldatribacterium	0.00485927	0.740621	0.00748672
Candidatus Carbobacillus	0	2.96269e-05	0
Candidatus Chazhemtobacterium	0	0	2.10189e-05
Candidatus Chloroploca	0	0	6.00539e-06
Candidatus Cloacimonas	0	0.000128383	0.0152637
Candidatus Competibacter	0	0	0.000510458
Candidatus Contendobacter	0	0	1.30117e-05
Candidatus Contubernalis	0	0	0.000265238
Candidatus Copromonas	0	0.000461686	0
Candidatus Copromorpha	0	0.000160479	0
Candidatus Coproplasma	0	0.000320958	0
Candidatus Cryosericum	0	0	2.60234e-05
Candidatus Denitrolinea	0	1.97513e-05	0
Candidatus Desulfofervidus	0	9.87563e-06	0.000216194
Candidatus Desulforudis	0.0163765	0.0147986	0.00202282
Candidatus Didemnitutus	0	0	6.00539e-06
Candidatus Egerieicola	0	0.000120977	0
Candidatus Electrothrix	2.68468e-05	0.000286393	6.00539e-05
Candidatus Enterenecus	0	0.000111101	0
Candidatus Entotheonella	0	0	3.0027e-05
Candidatus Faeciplasma	0	0.000582662	0
Candidatus Faecivivens	0	0.000116039	0
Candidatus Faecousia	0	4.19714e-05	0
Candidatus Fermentibacter	0	0	4.30386e-05
Candidatus Fimenecus	0	0.000780175	0
Candidatus Fimimonas	0	4.69093e-05	0
Candidatus Fimimorpha	0	3.95025e-05	0
Candidatus Fimousia	0	2.46891e-05	0
Candidatus Fonsibacter	0	0	1.20108e-05
Candidatus Formimonas	0	0.00136284	0.000777698
Candidatus Frackibacter	0	0	4.00359e-05
Candidatus Galligastranaerophilus	0	0.00350832	2.0018e-06
Candidatus Gallimonas	0	0.000301207	0
Candidatus Hadarchaeum	2.68468e-05	0.0251952	0.00420377
Candidatus Hakubanella	0.00150342	0.0116755	0.000366329
Candidatus Hamiltonella	0	0	7.60683e-05
Candidatus Huberarchaeum	0	0	0.000387348
Candidatus Hydrogenedens	0	0.00143197	0.000153137
Candidatus Hydromicrobium	0	0	0.000255229
Candidatus Izimaplasma	0	0	0.000317285
Candidatus Kentron	0	0	0.0012251
Candidatus Kryptobacter	0	0	2.10189e-05
Candidatus Kryptonium	0	0	4.9044e-05
Candidatus Kuenenia	0	0	4.30386e-05
Candidatus Limadaptatus	0	8.1474e-05	0
Candidatus Limiplasma	0	0.000123445	0
Candidatus Limivivens	0	3.45647e-05	0
Candidatus Macondimonas	0.000859097	0.000229608	0.00706034
Candidatus Magnetobacterium	0	0	6.00539e-05
Candidatus Magnetomorum	0	4.93782e-06	0.000174156
Candidatus Magnetoovum	0	0	4.50404e-05
Candidatus Manganitrophus	0	1.72824e-05	5.60503e-05
Candidatus Marinarcus	5.36936e-05	3.95025e-05	5.30476e-05
Candidatus Marithrix	0	0	5.00449e-06
Candidatus Mcinerneyibacterium	0	0	0.000972873
Candidatus Merdiplasma	0	0.000296269	0
Candidatus Merdisoma	0	6.91294e-05	0
Candidatus Merdivicinus	0	0.00276024	0
Candidatus Methanodesulfokores	0	0	0.000213191
Candidatus Methanofastidiosum	0	0.0886684	0.00224902
Candidatus Methanofishera	0	0	6.00539e-06
Candidatus Methanoliparum	0.000966484	0.0038515	22.3312
Candidatus Methanolliviera	0	9.38185e-05	0.027829
Candidatus Methanoperedens	0	0	0.000103093
Candidatus Methanosuratincola	0.00153027	3.02006	3.80344
Candidatus Methylomirabilis	0	0.000992501	3.9035e-05
Candidatus Methylumidiphilus	0	0.000456748	0
Candidatus Microsaccharimonas	0	0	1.0009e-05
Candidatus Microthrix	0	0	8.00719e-06
Candidatus Moduliflexus	0	0	2.40216e-05
Candidatus Muirbacterium	0	0	8.00719e-06
Candidatus Nanopelagicus	0	0.000101225	0
Candidatus Nanopusillus	0	0	0.000475427
Candidatus Nanosynbacter	0	0.000432059	0
Candidatus Nitrosacidococcus	0	0	1.10099e-05
Candidatus Nitrosocosmicus	0	0	2.0018e-06
Candidatus Nitrosotalea	0	0	3.30297e-05
Candidatus Nitrosotenuis	0	0.0160405	0
Candidatus Obscuribacter	0	2.22202e-05	0
Candidatus Odyssella	0	0	0.000142128
Candidatus Ornithoclostridium	0	0.000799926	0
Candidatus Ozemobacter	0	4.93782e-06	9.9089e-05
Candidatus Paceibacter	0	0	4.50404e-05
Candidatus Pelagibacter	0	1.23445e-05	2.0018e-06
Candidatus Pelethenecus	0	3.20958e-05	0
Candidatus Pelethomonas	0	0.000288862	0
Candidatus Phaeomarinobacter	0	0	2.90261e-05
Candidatus Prometheoarchaeum	0	2.96269e-05	0.000139125
Candidatus Promineofilum	0	6.91294e-05	1.60144e-05
Candidatus Protochlamydia	0	0.000118508	0
Candidatus Protoclostridium	0	4.44403e-05	0
Candidatus Pullichristensenella	0	0.000286393	0.000722649
Candidatus Pullilachnospira	0	8.88807e-05	0
Candidatus Reconcilbacillus	0	0	1.20108e-05
Candidatus Rhabdochlamydia	0	0	3.50314e-05
Candidatus Riesia	0	0	3.40305e-05
Candidatus Roseilinea	0	0.00038515	7.00629e-06
Candidatus Sabulitectum	0	0.000170355	0.000121109
Candidatus Saccharicenans	2.68468e-05	0.0125297	0.0397807
Candidatus Saccharimonas	0	6.91294e-05	0
Candidatus Scalindua	0	2.46891e-06	0.000229206
Candidatus Scatenecus	0	2.22202e-05	0
Candidatus Scatomorpha	0	1.97513e-05	0
Candidatus Solincola	2.68468e-05	0.0456254	7.60683e-05
Candidatus Spyradomonas	0	2.22202e-05	0
Candidatus Stahlbacteria	0	0	4.40395e-05
Candidatus Stoquefichus	0	1.97513e-05	0
Candidatus Sulfopaludibacter	0	9.87563e-06	5.50494e-05
Candidatus Sumerlaea	8.05404e-05	0.000167886	0.00269542
Candidatus Syntrophoarchaeum	0	0	0.000941846
Candidatus Syntrophocurvum	0	0	5.60503e-05
Candidatus Syntrophosphaera	0	0	3.70332e-05
Candidatus Tenderia	0	0	0.000126113
Candidatus Termititenax	0	0	1.40126e-05
Candidatus Thiodiazotropha	0.000429549	0.00119248	0.00129817
Candidatus Thiosymbion	0	0	0.000262235
Candidatus Udaeobacter	0	0.000439466	6.80611e-05
Candidatus Vecturithrix	0	3.95025e-05	0.000427384
Candidatus Viadribacter	0	0.000128383	0
Candidatus Vondammii	0	0	4.70422e-05
Candidimonas	2.68468e-05	7.40672e-05	2.0018e-05
Capillibacterium	0	0	4.50404e-05
Capnocytophaga	2.68468e-05	0.0022788	3.0027e-06
Caproiciproducens	0	0	3.0027e-05
Carboxydocella	0.00067117	0.00011357	0.0015554
Carboxydothermus	0.00295315	0.00024936	0.000349314
Carboxylicivirga	0	0	1.30117e-05
Cardiobacterium	0	0.00500201	0.000221199
Carideicomes	0	1.97513e-05	0.000235211
Carnobacterium	0	0.000313551	1.60144e-05
Casaltella	0	0.000325896	2.0018e-06
Castellaniella	8.05404e-05	0.0170503	2.70243e-05
Catenibacterium	0	2.96269e-05	0
Caulobacter	0.000859097	0.0461093	0.00152937
Cedecea	0	0.000750548	0
Celeribacter	0	0.000162948	0.00460113
Celerinatantimonas	0	0.000511064	5.00449e-05
Cellulomonas	0.000187928	7.90051e-05	0.000430386
Cellulosimicrobium	0	0.000148134	0.000104093
Cellvibrio	0	0.0110731	2.10189e-05
Cerasicoccus	0	4.69093e-05	4.9044e-05
Cereibacter	0	0.000382681	0.000511459
Chachezhania	0	2.22202e-05	0.00067961
Changpingibacter	0	0	7.30656e-05
Chelativorans	0	1.48134e-05	0.000249224
Chelatococcus	0.000107387	0.00647595	0.00102092
Chenggangzhangella	0	1.97513e-05	0
Chiayiivirga	0	0	1.50135e-05
Chitinolyticbacter	0	3.45647e-05	3.0027e-06
Chitinophaga	0	0.00329846	8.00719e-06
Chlamydia	0.00609422	0.017749	0.000294264
Chloracidobacterium	0	0.556645	0.00090281
Chlorobaculum	0	0	8.00719e-06
Chlorobium	0	5.4316e-05	0.000302271
Chloroflexus	0	0.00402185	0.000114102
Chondromyces	0	1.23445e-05	1.50135e-05
Christensenella	0	0	2.90261e-05
Chromatium	0	1.97513e-05	3.30297e-05
Chromatocurvus	0	0	0.000402361
Chromobacterium	0	0	5.80521e-05
Chromohalobacter	0	0	4.60413e-05
Chroococcidiopsis	0	0.00011357	0
Chryseobacterium	2.68468e-05	0.0487856	0.00035632
Chryseoglobus	0.000134234	0.000190106	0.000483434
Chrysiogenes	0	0	1.40126e-05
Chthoniobacter	0	0.000120977	1.0009e-05
Chthonomonas	0	0	3.9035e-05
Ciceribacter	0.000107387	0.056696	0.00102192
Citreicella	0	4.93782e-06	0.000195175
Citreimonas	0	0	0.000249224
Citricoccus	0	0	1.30117e-05
Citrifermentans	0	0	8.00719e-06
Citrobacter	0	0.0064957	3.80341e-05
Citromicrobium	0	0	8.60773e-05
Clavibacter	0	0	0.000102092
Cloacibacillus	0	0	5.30476e-05
Cloacibacterium	0	0.0023183	0
Clostridiisalibacter	0	0	1.60144e-05
Clostridioides	0.00273837	0.00476006	0.000847761
Clostridium	0.0929704	0.0126137	0.0160254
Cnuella	0	0.000612289	0
Cobetia	0	0	0.000222199
Cognatishimia	0	9.87563e-06	0.000173155
Cohaesibacter	0	7.40672e-05	0.000143128
Cohnella	0	0.00107151	6.20557e-05
Coleofasciculus	0	5.92538e-05	8.00719e-06
Collinsella	0.000107387	0.00160973	0
Colwellia	0	3.45647e-05	9.00809e-06
Comamonas	0.00182558	0.149539	0.000154138
Commensalibacter	0	0	5.00449e-06
Companilactobacillus	0	0.000143197	0
Conexibacter	0	0.000116039	1.70153e-05
Congregibacter	0	0	6.00539e-06
Consotaella	0	1.48134e-05	6.60593e-05
Coprothermobacter	0.000322161	0.00278246	0.200581
Coraliihabitans	0	0	2.80252e-05
Corallococcus	0.000241621	0.000893745	0.000240216
Coralloluteibacterium	0	1.97513e-05	0
Corticibacterium	0	7.40672e-05	0
Corynebacterium	0.314269	2.0814	0.0106275
Coxiella	0	0	6.00539e-06
Crassaminicella	0	7.40672e-06	0.000168151
Crenobacter	0	8.1474e-05	2.0018e-05
Cribrihabitans	0	0	0.00015614
Croceibacterium	0	0.000278987	0
Croceicoccus	0	0.000111101	2.70243e-05
Crocinitomix	0	2.96269e-05	0.00163647
Crocosphaera	0	0.00112088	0
Cronobacter	0.000161081	0.00301947	0.000104093
Cryobacterium	0	0.000283924	0.000214192
Cucumibacter	0	0	6.40575e-05
Cuniculiplasma	0	0	2.30207e-05
Cupidesulfovibrio	0	0.0002938	4.00359e-06
Cupriavidus	0.000724863	0.0435639	0.000821738
Curtobacterium	0	0.00332562	0.000428385
Curvibacter	0.0136919	0.0025652	0.000181163
Cutibacterium	0.160759	6.35699	0.0663426
Cyanosarcina	0	7.15983e-05	0
Cyanothece	0	0	8.00719e-06
Cyclobacterium	0	0	2.30207e-05
Cycloclasticus	0	0	0.000184165
Cystobacter	0	0	7.30656e-05
Cytobacillus	0	5.4316e-05	0
Cytophaga	0	0	1.30117e-05
Dactylosporangium	0	4.93782e-05	0
Dankookia	0	0	6.00539e-06
Dechloromonas	0	0.00106904	0.00032329
Deferribacter	0.000134234	0.000380212	0.00722749
Deferrisoma	8.05404e-05	4.69093e-05	0.0279581
Deferrivibrio	2.68468e-05	0.00122211	0.0092473
Defluviicoccus	0	0	2.40216e-05
Defluviimonas	0.00222828	0.0595254	0.0822188
Defluviitalea	0	2.46891e-06	1.90171e-05
Defluviitoga	0	0	0.00970371
Dehalobacter	0	4.93782e-06	0.000426383
Dehalobacterium	0	0	6.40575e-05
Dehalococcoides	0	9.87563e-06	0.000182164
Dehalogenimonas	0	0	0.000264237
Deinococcus	8.05404e-05	0.315149	0.00113402
Delftia	0.147335	0.0650409	0.0153618
Demequina	0.000161081	0.0141888	0.000448403
Dendrosporobacter	0	0	0.000308277
Denitratisoma	0	7.65362e-05	5.00449e-06
Denitrificimonas	0	0	2.90261e-05
Denitrovibrio	0	0.000424652	0.000252226
Dermabacter	0	0.00045181	0
Dermacoccus	0.000349008	0.0490918	0.000126113
Desemzia	0	0.00015801	0
Desertifilum	0	0	8.00719e-06
Desertimonas	0	5.92538e-05	0
Desmospora	0	0.000108632	0
Desulfacinum	0.104541	3.78021	0.0693212
Desulfallas	5.36936e-05	2.46891e-05	0.00158242
Desulfamplus	0	0	0.000351315
Desulfarculus	0	0.000266642	0.00039035
Desulfatibacillum	0	0.000372805	0.000199179
Desulfatiglans	0	0.00172083	0.000475427
Desulfatirhabdium	0	0	0.000224201
Desulfatitalea	0	0.000592538	0.00391752
Desulfitibacter	0	0	5.10458e-05
Desulfitobacterium	0	0	0.000450404
Desulfobacca	0	0.000335772	2.80252e-05
Desulfobacter	0.000107387	0.000523409	0.00372134
Desulfobacterium	0	0	0.000131118
Desulfobacula	0	2.46891e-06	0.000997896
Desulfobotulus	0	0	5.60503e-05
Desulfobulbus	0.000429549	0.00662408	0.0123821
Desulfocapsa	0	9.87563e-06	2.20198e-05
Desulfocarbo	0	0.000402432	0.000185166
Desulfocicer	0	0	0.000154138
Desulfococcus	0.00754395	0.000659199	0.000299269
Desulfocucumis	0	0	4.80431e-05
Desulfocurvibacter	0	0	2.60234e-05
Desulfocurvus	0	0	4.00359e-05
Desulfofalx	0	0	0.00113302
Desulfofarcimen	0	4.93782e-06	3.40305e-05
Desulfofundulus	0.0614255	0.034029	0.0220368
Desulfofustis	0	0.000557973	0.00120408
Desulfoglaeba	0.00230882	0.0153146	0.472712
Desulfogranum	0	0	0.000177159
Desulfohalobium	0	0	0.000457411
Desulfohalovibrio	0	0.00226893	0.000137123
Desulfolucianica	0	0	0.000446401
Desulfoluna	0	0	2.20198e-05
Desulfomicrobium	0	7.40672e-05	1.10099e-05
Desulfomonile	0	3.45647e-05	3.70332e-05
Desulfonatronospira	0	0	0.000232208
Desulfonatronovibrio	0	5.67849e-05	0.000291261
Desulfonatronum	0	0	0.00024522
Desulfonauticus	0.000724863	9.13496e-05	0.00646981
Desulfonema	0	0	0.000105094
Desulfonispora	0	0	0.00139725
Desulfopila	0	0	2.10189e-05
Desulfoprunum	0	0.000108632	0.000321288
Desulforadius	0	0	0.000254228
Desulforamulus	0.000107387	2.46891e-05	0.000906814
Desulforapulum	0	0	0.000177159
Desulforhabdus	0.000295315	0.000839429	0.00025623
Desulforhopalus	0	6.66605e-05	6.60593e-05
Desulfosalsimonas	0	0	0.00124612
Desulfosarcina	5.36936e-05	0.000303676	0.0287398
Desulfoscipio	5.36936e-05	2.96269e-05	0.00162246
Desulfosoma	5.36936e-05	0.00153566	0.00176458
Desulfospira	0	0	4.30386e-05
Desulfosporosinus	0.000402702	0.00185909	0.00249524
Desulfosudis	0	0	0.000773695
Desulfotignum	1.08558	0.0129791	0.260944
Desulfotomaculum	0.00402702	0.00522668	0.00956058
Desulfotruncus	2.68468e-05	0.000945592	0.000181163
Desulfovermiculus	0	0	0.00253327
Desulfovibrio	0	0.0353523	0.0012301
Desulfovirgula	0.0285113	0.0037404	0.000629565
Desulfurella	0	0.00038515	0.000592532
Desulfurispora	0.000107387	3.20958e-05	0.000428385
Desulfurivibrio	0.000107387	0.085281	0.000985885
Desulfurobacterium	0	0	3.60323e-05
Desulfuromonas	0.000402702	0.00159985	0.0152637
Desulfuromusa	0	0	0.000818735
Dethiobacter	0.00123495	0.00067895	0.00387248
Dethiosulfatarculus	0	0	9.9089e-05
Dethiosulfatibacter	0	0	5.50494e-05
Dethiosulfovibrio	0	0	0.00410669
Devosia	5.36936e-05	0.0130062	0.000859772
Dialister	0	0.00319477	0
Diaminobutyricibacter	0	0.000101225	0
Diaphorobacter	0.00214774	0.0639571	8.30746e-05
Dichelobacter	0	0.000153072	8.00719e-06
Dichotomicrobium	0	2.46891e-06	0.00138124
Dickeya	0	0.0102262	1.40126e-05
Dictyoglomus	0.000536936	0.00387372	0.00117505
Dielma	0	4.19714e-05	0
Dietzia	0.00244306	0.034824	0.10087
Dinoroseobacter	0	9.87563e-06	0
Dissulfuribacter	0	0	0.000107096
Dissulfurirhabdus	0	1.97513e-05	0.00073566
Dokdonella	0	0	4.9044e-05
Dolichospermum	0	0	7.00629e-06
Dolosigranulum	0	0.000160479	0
Domibacillus	0	0.00125174	0
Donghicola	0	0	3.0027e-05
Dorea	0	0.000269111	9.00809e-06
Draconibacterium	0	0.0401173	7.30656e-05
Duganella	0	0.00216276	1.70153e-05
Dyadobacter	0	0.00173811	1.80162e-05
Dyella	0	7.40672e-05	1.20108e-05
Dysgonomonas	0	0	4.40395e-05
Ectothiorhodospira	0	9.87563e-06	0.000774695
Edaphobacter	0	7.40672e-05	0
Edwardsiella	0	0.00011357	5.00449e-05
Effusibacillus	0	0	0.000325292
Eggerthella	0	0.000871525	0
Egicoccus	0	0.000108632	0
Eisenbergiella	0	0.000301207	0
Ekhidna	0	0	3.20288e-05
Elizabethkingia	0	6.91294e-05	6.30566e-05
Elstera	0	1.97513e-05	0
Emcibacter	0	0	1.80162e-05
Empedobacter	0	5.67849e-05	0
Endobacterium	0	0.000182699	0
Endozoicomonas	0	0	2.0018e-05
Enemella	0	0.000241953	0
Enhydrobacter	0	0.00119248	1.0009e-06
Enhygromyxa	0	0	1.10099e-05
Ensifer	0	5.18471e-05	0.000294264
Enteractinococcus	0	0.000153072	0
Enterobacter	0.00343639	0.317571	0.00143629
Enterocloster	0	0.000103694	0
Enterococcus	0.0393574	0.0221165	0.000922828
Enterovibrio	0	0	1.40126e-05
Enterovirga	0	0.000822146	0.000135121
Entomospira	0	0	6.10548e-05
Eoetvoesia	0	7.90051e-05	0
Epibacterium	0	0	8.40755e-05
Epidermidibacterium	0	2.96269e-05	0
Epilithonimonas	0.000912791	0.0378755	9.00809e-06
Epulopiscium	0	0	0.000481432
Erwinia	0	0.000878931	0
Erysipelothrix	0	0	0.000125112
Erythrobacter	0	0.000419714	0.000338304
Escherichia	10.2037	0.795838	0.184021
Eubacterium	0	0.000256766	0
Euryhalocaulis	0	0	1.70153e-05
Ewingella	0	0.000148134	0
Exiguobacterium	0	0.0236793	2.0018e-06
Exilispira	0	0	3.20288e-05
Extensimonas	0.000724863	0.0830862	0.000265238
Faecalibacterium	0	0.00521927	9.00809e-06
Falsiroseomonas	0	0	1.40126e-05
Falsiruegeria	0	0	4.10368e-05
Falsochrobactrum	0	0	4.30386e-05
Fannyhessea	0	4.44403e-05	0
Fastidiosibacter	0	0	9.00809e-05
Fastidiosipila	0	0	3.50314e-05
Fermentimonas	0	0	7.00629e-06
Ferrimonas	0	0	4.20377e-05
Ferroglobus	0.00179873	0	0.000143128
Ferrovum	0.000859097	0	2.20198e-05
Ferruginibacter	0	6.41916e-05	0
Ferruginivarius	0	2.46891e-06	0.00150135
Fervidicoccus	2.68468e-05	0.000382681	0.00132519
Fervidicola	0.000268468	0.000177761	0.000377339
Fervidobacterium	0.0016645	0.00463167	0.00329095
Fibrella	0	0.00140728	0
Fibrisoma	0	0.000740672	0
Fibrobacter	0	0.0109891	0.00108998
Fictibacillus	0	0.00163936	0.000253227
Filimonas	0	0.000192575	0
Filomicrobium	2.68468e-05	1.23445e-05	0.0042288
Fimbriiglobus	0	2.46891e-05	1.40126e-05
Fimbriimonas	0	0.00020245	0
Finegoldia	2.68468e-05	0.00439713	3.0027e-06
Fischerella	0	0.00106163	5.20467e-05
Flagellatimonas	0	0	4.20377e-05
Flaviflexus	0	0.00115545	0
Flavihumibacter	0	4.93782e-05	0
Flavimaricola	0	0	1.20108e-05
Flavipsychrobacter	0	8.64118e-05	0
Flavisolibacter	0	0.000627103	1.90171e-05
Flavobacterium	0.00408071	0.0454674	0.000975876
Flavonifractor	0	0.00164182	0
Flexilinea	0	0	6.9062e-05
Flexistipes	0.0365653	0.00405148	4.0717
Fluviibacterium	0	0	1.0009e-05
Fodinicurvata	0	0	0.000662595
Fonticella	0	0	2.80252e-05
Fournierella	0	0.000286393	0
Francisella	5.36936e-05	0.0269457	5.9053e-05
Franconibacter	0	2.46891e-05	6.00539e-06
Frankia	0.000268468	0.000444403	0.000101091
Frateuria	0	0.000237015	0
Fretibacterium	0	8.64118e-05	0
Frigidibacter	0.000134234	0.00308614	0.0040056
Frigoribacterium	0	3.45647e-05	8.70782e-05
Frondihabitans	0	0.000308614	0
Fuchsiella	0	0	5.10458e-05
Fulvimarina	0	0	3.50314e-05
Fulvimonas	0	0	2.20198e-05
Fundicoccus	0	5.92538e-05	0
Fuscovulum	0	2.46891e-06	0.00018917
Fusibacter	0	0	3.0027e-06
Fusobacterium	0	0.000116039	0.000362325
Gallalistipes	0	8.39429e-05	0
Gallicola	0	0	0.00168151
Gallionella	0	0.0015406	0.00032329
Garciella	2.68468e-05	5.92538e-05	0.00774395
Gardnerella	0	0.00210351	0
Geitlerinema	0	0	3.10279e-05
Gellertiella	0	0	2.40216e-05
Gelria	0.00158396	0.00227386	0.0012221
Gemella	0	0.00015801	0
Geminicoccus	0.00147657	0.000116039	0.000112101
Geminocystis	0	0.00184674	0
Gemmata	0	0.000185168	0
Gemmatimonas	0	0.000619696	0.0001111
Gemmatirosa	0	5.18471e-05	0
Gemmiger	0	0.000266642	0
Gemmobacter	0	0.0020566	0.00045641
Geoalkalibacter	0.00475188	0.0121199	2.44571
Geobacillus	0.0016645	0.00498473	0.00164748
Geobacter	0	6.17227e-05	0.000618555
Geodermatophilus	0	0.000118508	3.20288e-05
Geoglobus	0.000966484	0.000143197	0.000578519
Geomesophilobacter	0	0	7.00629e-06
Geomonas	0	0.000217264	8.00719e-06
Geopsychrobacter	5.36936e-05	1.23445e-05	0.00346811
Georgenia	0.00187928	0.000839429	0.00848662
Geosporobacter	0	7.40672e-06	0.000406365
Geotalea	0	0	2.0018e-05
Geothermobacter	2.68468e-05	4.93782e-06	0.00118606
Geothrix	0	0.00630806	0
Geotoga	0.000161081	0.000165417	0.0339104
Geovibrio	0	0.000901152	0.00030027
Ghiorsea	0	0	1.20108e-05
Gilliamella	0	5.4316e-05	7.50674e-05
Gimesia	0	2.96269e-05	0.00015614
Glaciecola	0	8.39429e-05	2.0018e-06
Gluconacetobacter	0.000429549	0	0
Gluconobacter	0	0.000185168	1.90171e-05
Glutamicibacter	0	0.0021677	0
Glycocaulis	0	0	0.000674606
Glycomyces	0	0.000718452	2.50225e-05
Gordonia	0.000456395	0.36469	0.00190771
Gordonibacter	0	0.00468599	9.60863e-05
Gottfriedia	0	0.000167886	0
Gottschalkia	0	0	1.80162e-05
Gracilibacillus	0	0	2.90261e-05
Gracilibacter	0	0	0.000548492
Gracilimonas	0	0	9.20827e-05
Gracilinema	0	0	5.00449e-05
Granulicatella	0	0	6.00539e-06
Granulicella	0	0.000878931	0
Gryllotalpicola	0	0.000140728	4.9044e-05
Gudongella	2.68468e-05	0.00104682	0.00150135
Gulosibacter	8.05404e-05	5.4316e-05	2.70243e-05
Guyparkeria	0.0246722	0.00452551	0.22843
Haematobacter	0	0.0109373	0.0001111
Haematospirillum	0	6.66605e-05	6.00539e-06
Haemophilus	8.05404e-05	0.019576	1.20108e-05
Hafnia	0	0.000888807	1.0009e-05
Haladaptatus	0	0.000140728	0.000906814
Halalkalibacterium	0	7.40672e-05	0
Halalkalicoccus	0	3.95025e-05	1.0009e-06
Halanaeroarchaeum	0	0	7.70692e-05
Halanaerobacter	0	0	4.00359e-06
Halanaerobium	0.000107387	0.000217264	0.00594334
Halarsenatibacter	0	0	0.000466419
Haliea	0	6.41916e-05	0.000376338
Halioglobus	0	0	7.70692e-05
Haliscomenobacter	0	3.95025e-05	2.10189e-05
Haloactinospora	0	1.48134e-05	0
Haloarcula	0	0.0011036	2.0018e-06
Halobacillus	0	0.000259235	3.80341e-05
Halobacteriovorax	0	0	3.40305e-05
Halocalculus	2.68468e-05	0	0.00241016
Halocella	0	0	0.000538483
Halococcus	0	0.00033824	1.0009e-06
Haloferax	0	5.4316e-05	2.80252e-05
Halohasta	0	0	3.40305e-05
Halolactibacillus	0	0	2.40216e-05
Halomicroarcula	0	0.103976	3.0027e-06
Halomicronema	0	0	6.10548e-05
Halomonas	0.0582307	0.0964874	0.076889
Halonatronum	0	0	2.10189e-05
Halopseudomonas	0	0.00806099	0.000113102
Halorhodospira	0	0	5.50494e-05
Halorubrum	0.000214774	0.00309848	0.00038935
Halospina	0	0	3.30297e-05
Halotalea	0	0	1.20108e-05
Haloterrigena	0	0	1.0009e-05
Halothermothrix	0	5.4316e-05	0.00162146
Halothiobacillus	0.0245648	0.00159738	0.0373756
Halovulum	0	0	0.000203182
Hansschlegelia	0	3.95025e-05	0
Hanstruepera	0	0	2.70243e-05
Hartmannibacter	0	4.93782e-06	7.50674e-05
Helicobacter	0.000134234	0.0010641	0.000442397
Heliobacterium	0	0	7.50674e-05
Heliomicrobium	0	0	0.000379341
Heminiphilus	5.36936e-05	0.000466624	0
Henriciella	0.00848359	0.0126087	0.812168
Herbaspirillum	0	0.00221955	0.000240216
Herbiconiux	0	0.000355523	0
Herbinix	0	0	0.000208187
Herminiimonas	5.36936e-05	9.87563e-06	0
Herpetosiphon	0	0.00011357	0
Heyndrickxia	0	0	8.00719e-06
Hippea	0	0	0.000648582
Hirschia	0	0	0.000347312
Histidinibacterium	0	0	7.00629e-06
Hoeflea	0.000107387	0.12885	0.017846
Hongsoonwoonella	0	0	8.00719e-06
Humibacter	0	6.41916e-05	0
Hungatella	0	0.00159985	0
Hwanghaeella	0	0	5.00449e-05
Hwanghaeicola	0	0.000123445	5.50494e-05
Hyalangium	0	0.000153072	0
Hydrobacter	0	0.000246891	0
Hydrocarboniclastica	0	2.96269e-05	0
Hydrocarboniphaga	0	0	8.00719e-06
Hydrogeniiclostidium	0	0	8.00719e-06
Hydrogenimonas	0	0	8.00719e-06
Hydrogenispora	0	0.000133321	0
Hydrogenobacter	0	0	0.000123111
Hydrogenophaga	0.000456395	0.00301947	7.20647e-05
Hydrogenophilus	0.000161081	0.000133321	0.00191472
Hydrogenothermus	0	0	4.00359e-05
Hydrogenovibrio	0.000161081	1.97513e-05	0.00832447
Hylemonella	0	0	3.70332e-05
Hymenobacter	0	0.0452724	0.000115103
Hypericibacter	0	2.7158e-05	2.70243e-05
Hyphomicrobium	0.00179873	0.041769	0.121576
Hyphomonas	0.00410756	0.00904855	0.613935
Hypnocyclicus	0	0	7.80701e-05
Iamia	0	0	2.90261e-05
Idiomarina	2.68468e-05	0.000597476	0.000183164
Ignavibacterium	0	0.000528346	9.70872e-05
Ignisphaera	0	9.87563e-06	6.30566e-05
Ilyobacter	0	0	3.20288e-05
Imhoffiella	0	0	0.000126113
Immundisolibacter	0.0906616	0.818105	0.0363316
Indibacter	0	0	2.30207e-05
Indioceanicola	0	9.87563e-06	0.000144129
Infirmifilum	0	0	0.000152137
Inquilinus	0	0	7.40665e-05
Insolitispirillum	0	0.000229608	9.50854e-05
Intestinibacillus	0	0	1.40126e-05
Intestinimonas	0	0.00236028	6.80611e-05
Intrasporangium	0	1.48134e-05	0
Iocasia	0	0	0.00021219
Iodidimonas	0	0.000123445	7.9071e-05
Isoptericola	0	0	1.70153e-05
Janibacter	5.36936e-05	0.00588588	0.00017816
Jannaschia	2.68468e-05	0.00139246	0.00282854
Janthinobacterium	0.000268468	0.0564022	0.000521468
Jeotgalibacillus	0	0.000540691	0
Jeotgalicoccus	0	0.00214054	2.80252e-05
Jhaorihella	0	1.48134e-05	4.9044e-05
Jiangella	0	0	5.30476e-05
Jiella	0	1.97513e-05	0.000132119
Kaistella	0	0.000614758	0
Kaistia	0	0.00120977	3.60323e-05
Kalamiella	0	0.000204919	0
Kandeliimicrobium	0	0	2.20198e-05
Kaustia	0	0	0.000183164
Keratinibaculum	0	0	0.00226603
Kerstersia	0	0.000138259	0
Ketobacter	0	0	2.40216e-05
Ketogulonicigenium	0	0	1.50135e-05
Kineococcus	0	0.000153072	0
Kineosphaera	0	2.96269e-05	0
Kineothrix	0	2.96269e-05	0
Kingella	0	0.0042638	1.0009e-05
Kiritimatiella	0	9.87563e-06	0.000411369
Kitasatospora	0	0.00024936	0
Klebsiella	0.154557	0.525902	0.00973074
Klenkia	0.00134234	0	2.0018e-06
Knoellia	0	0.000306145	1.0009e-06
Kocuria	0.000563783	0.104284	0.000930836
Koleobacter	0.00303369	0.00338981	0.0653477
Komagataeibacter	0	0.000167886	0
Kordiimonas	0	0	8.10728e-05
Kosmotoga	0.000644323	0.000538222	1.7282
Kouleothrix	0	0.000209857	1.0009e-06
Kovacikia	0	0	1.0009e-05
Kribbella	0	0	0.000125112
Kroppenstedtia	0	0	7.20647e-05
Ktedonobacter	0	1.97513e-05	1.30117e-05
Kurthia	0	0.000562911	0
Kushneria	0	0	2.0018e-05
Kyrpidia	0.000134234	0.00230349	0.00336402
Kytococcus	5.36936e-05	0.00283431	0.000253227
Labilibaculum	0	0	9.00809e-06
Labilithrix	0	0.00106904	2.0018e-05
Labrys	0	0.00027158	0
Lachnoanaerobaculum	0	4.93782e-05	0
Lachnoclostridium	0	2.96269e-05	8.00719e-06
Lacisediminihabitans	0	0	2.20198e-05
Lacisediminimonas	0	8.1474e-05	0
Lacticaseibacillus	0.000402702	0.00457242	0.000147132
Lactiplantibacillus	0	0.00337006	8.20737e-05
Lactobacillus	0.00555729	0.00905842	0.000175157
Lactococcus	0	0.00151097	3.10279e-05
Lampropedia	0	3.45647e-05	0.00030127
Lapillicoccus	0	0.000518471	0
Laribacter	0	0	8.60773e-05
Larkinella	0	0.000111101	0
Larsenimonas	0	0	1.90171e-05
Lascolabacillus	0	0	3.30297e-05
Latilactobacillus	0	0	0.000172155
Lautropia	0	0.00445638	2.10189e-05
Lawsonella	0.0137187	0.368675	0.00721948
Lawsonibacter	0	0	6.00539e-06
Lebetimonas	0	0	6.60593e-05
Leclercia	0	0.00405148	0.000166149
Leekyejoonella	0	0	1.0009e-05
Legionella	1.00786	0.0117026	0.0230617
Leifsonia	8.05404e-05	0.0242941	0.000354318
Leisingera	0	0	0.000286257
Lelliottia	0	4.19714e-05	0
Lentibacillus	0	0	0.000208187
Lentimicrobium	0	0.000259235	0
Leptolinea	0	0	6.50584e-05
Leptolyngbya	0	0.000283924	4.80431e-05
Leptospira	2.68468e-05	0.01211	0.000440395
Leptospirillum	5.36936e-05	0	0.00016715
Leptotrichia	0	1.97513e-05	5.60503e-05
Leucobacter	2.68468e-05	0.000138259	5.9053e-05
Leuconostoc	0	0.00132333	0
Leucothrix	0	5.67849e-05	0
Levilactobacillus	0	0.00209363	1.70153e-05
Levilinea	0	0	4.00359e-05
Levyella	0	1.48134e-05	0
Lewinella	0	0	1.50135e-05
Liberibacter	0	6.17227e-05	1.0009e-06
Ligilactobacillus	0	0.000172824	0
Lignipirellula	0	0	3.0027e-05
Limibacillus	0	0	6.00539e-06
Limihaloglobus	0	0	0.000794713
Limimaricola	0	0	2.30207e-05
Limisalsivibrio	0	0	1.80162e-05
Limisphaera	0	0	5.80521e-05
Limnobacter	0	0.000101225	3.0027e-06
Limnochorda	5.36936e-05	0.000627103	0.00580721
Limnoglobus	0	0.000145666	0
Limnohabitans	0	0.00441688	5.10458e-05
Limosilactobacillus	0	0.000323427	0
Listeria	0.882937	0.0279406	0.0102502
Litorilinea	0	0	0.000192173
Loigolactobacillus	0	0	4.80431e-05
Loktanella	0	0.00173317	0.000322289
Longilinea	0	0	4.80431e-05
Longimicrobium	0	0.00015801	0
Longimycelium	0	2.46891e-06	1.80162e-05
Lujinxingia	0	0	0.00034531
Luteibacter	0	0.00101472	0
Luteimonas	2.68468e-05	8.64118e-05	0.000131118
Luteitalea	0	0.00015801	1.80162e-05
Lutibacter	0	2.46891e-05	6.50584e-05
Lutibaculum	0	0.000256766	0.00173956
Lutimaribacter	0	9.87563e-06	0.0010019
Lysinibacillus	0	3.95025e-05	0
Lysobacter	0	0.0069796	9.10818e-05
Macellibacteroides	0	6.66605e-05	0
Macrococcus	0	0.000128383	0
Macromonas	8.05404e-05	3.45647e-05	0
Magnetospirillum	0.000241621	5.92538e-05	0.00229606
Magnetovibrio	0	0	8.00719e-06
Mahella	0	3.45647e-05	0.00108397
Mailhella	0	0	3.70332e-05
Maledivibacter	0	0	1.0009e-05
Malikia	0	3.20958e-05	8.00719e-06
Malonomonas	0	0	0.000123111
Mameliella	0	0.000829553	0.000654588
Mammaliicoccus	0.000134234	0.00076783	1.60144e-05
Mangrovibacterium	0	0	2.60234e-05
Mangrovicoccus	0	0	0.000102092
Mangrovimonas	0	0	5.70512e-05
Mangrovitalea	0	0	1.30117e-05
Maribacter	0	0	1.30117e-05
Maribellus	0	0.0104089	0
Maricaulis	0.00434918	0.00588588	0.140989
Marichromatium	0	0	5.20467e-05
Maridesulfovibrio	0	0	1.50135e-05
Marimonas	0	0.00864859	0
Marinibacterium	5.36936e-05	1.23445e-05	0.00219697
Marinicauda	0	0	1.50135e-05
Marinicaulis	0	2.46891e-06	0.0146251
Mariniflexile	0	0	6.00539e-06
Marinilabilia	0	0	9.40845e-05
Marinimicrobium	2.68468e-05	0	0.000553497
Mariniphaga	0	0.000259235	0.000109098
Mariniradius	0	1.97513e-05	0
Marinithermus	0	0	6.30566e-05
Marinitoga	0	4.93782e-06	0.00448903
Marinobacter	0.158289	0.902386	1.06004
Marinobacterium	1.14963	0.1467	0.326714
Marinococcus	0	0.000261704	0
Marinomonas	0.000161081	4.93782e-06	0.000447402
Marinospirillum	0	0	1.70153e-05
Marinosulfonomonas	0	2.46891e-06	0.000360323
Marinovum	0	2.46891e-06	0.000185166
Mariprofundus	0	0	1.20108e-05
Marispirochaeta	5.36936e-05	0.000414777	0.01112
Maritimibacter	0	0.000486375	0.000753677
Marivibrio	0	0	0.000131118
Marivita	5.36936e-05	3.70336e-05	0.000163146
Marivivens	0	0	2.10189e-05
Marmoricola	0	0.000525877	5.9053e-05
Martelella	0.00974539	0.0128926	0.210357
Massilia	0.00120811	0.163508	0.00157642
Massilibacteroides	0.000161081	0	0.00318486
Massilicoli	0	3.45647e-05	0
Mediterraneibacter	0	0.00146406	0
Megamonas	0	0	1.50135e-05
Megasphaera	0	0.000120977	2.20198e-05
Meinhardsimonia	0	0	0.000169152
Meiothermus	0	0.00870043	0.000871783
Melaminivora	0	0.000192575	0
Melioribacter	0	0.0125075	0.0166439
Merdibacter	0	1.97513e-05	0
Mesoaciditoga	0	8.64118e-05	0.000781702
Mesobacillus	5.36936e-05	0.00141222	0.000304273
Mesobacterium	0	0	0.000177159
Mesobaculum	0	0	1.20108e-05
Mesorhizobium	0.408393	0.536694	0.0164528
Mesosutterella	0	0	1.40126e-05
Mesotoga	0.000483242	0.0343919	0.468237
Methanobacterium	0.000268468	0.0245014	0.0477278
Methanobrevibacter	0	0.0187785	0.000188169
Methanocalculus	0.000241621	0.154092	0.00877588
Methanocaldococcus	0.000161081	0.484654	0.00271544
Methanocella	0.00255045	0.000404901	0.000132119
Methanococcoides	0	2.46891e-06	0.0015594
Methanococcus	0.000429549	0.0278098	0.000576518
Methanocorpusculum	0	9.62874e-05	1.10099e-05
Methanoculleus	0.00746341	0.00635003	1.4882
Methanofervidicoccus	0.000161081	5.4316e-05	0.00024522
Methanofollis	2.68468e-05	0.00270592	0.00460613
Methanogenium	0	0.000108632	0.00118206
Methanohalophilus	0.000187928	0.00213067	0.0886486
Methanolacinia	0	6.41916e-05	0.000128115
Methanolinea	0.000187928	0.0129963	1.712
Methanolobus	0	0.000197513	0.00398758
Methanomassiliicoccus	0	0	5.30476e-05
Methanomethylovorans	8.05404e-05	0.00672037	0.0160224
Methanomicrobium	0	1.97513e-05	4.80431e-05
Methanoplanus	0	2.96269e-05	0.000398358
Methanoregula	0	0.00040737	0.0114793
Methanosalsum	0	0	0.000535481
Methanosarcina	0.00139603	0.00217511	0.0137073
Methanosphaera	0	0.000345647	0
Methanospirillum	0	2.22202e-05	0.00102492
Methanothermobacter	0.0221754	10.5369	0.223011
Methanothermococcus	0	0.000106163	0.00131518
Methanothermus	0.000268468	0.00765855	0.153819
Methanothrix	1.50482	4.51493	17.7062
Methanotorris	0	0	8.00719e-06
Methermicoccus	0.00249675	0.000367867	0.0476748
Methylacidimicrobium	0	0	0.000270243
Methylacidiphilum	0	0	2.70243e-05
Methylibium	0.0356525	0.018818	2.50225e-05
Methylobacillus	0	0.000706108	0
Methylobacter	0	1.23445e-05	0.000106095
Methylobacterium	0.000429549	0.0881697	0.00381643
Methylobrevis	0	4.44403e-05	3.0027e-05
Methylocaldum	0	9.87563e-06	0.000155139
Methyloceanibacter	5.36936e-05	0.000632041	0.00181663
Methylococcus	0	0	8.60773e-05
Methylocystis	0.000187928	0.000276518	0.00390551
Methyloglobulus	0	2.96269e-05	0
Methylohalobius	0	0.0011431	8.50764e-05
Methyloligella	2.68468e-05	9.38185e-05	0.00109899
Methylomagnum	0	0	3.40305e-05
Methylomicrobium	0	0	1.70153e-05
Methylomonas	0	0.000940654	3.9035e-05
Methylonatrum	0	0	8.00719e-06
Methylophaga	0.000187928	0.00260964	0.00137624
Methylophilus	0	0.000757955	4.00359e-06
Methylopila	0	0	9.00809e-06
Methyloprofundus	2.68468e-05	0	0.000252226
Methylorubrum	0	0.0327896	3.20288e-05
Methylotenera	0	0.00131099	2.30207e-05
Methyloterricola	0	0.000713514	3.10279e-05
Methyloversatilis	2.68468e-05	0.057212	9.50854e-05
Methylovirgula	0	0.000199982	6.50584e-05
Methylovorus	0	0.000439466	0
Micavibrio	0.000107387	0.00822887	0.00658891
Microbacterium	0.0129402	0.107714	0.127155
Microbispora	0	0	1.90171e-05
Microbulbifer	0	0.000106163	2.0018e-06
Microcella	0	5.92538e-05	0.000342307
Micrococcus	0.000778557	0.0815258	0.00180862
Microcoleus	0	9.87563e-05	1.20108e-05
Microcystis	0	0.00380459	0.00015614
Microlunatus	0	1.48134e-05	0.000110099
Micromonospora	0.000107387	0.000955468	0.000118106
Microvenator	0	0	1.80162e-05
Microvirga	8.05404e-05	0.000641916	0.00198078
Millionella	0	0.000167886	1.0009e-06
Minwuia	0.000214774	0.00695985	0.00585926
Mitsuaria	0	0.00154801	1.0009e-06
Mobiluncus	0	0.00247138	0
Modestobacter	5.36936e-05	0.000217264	3.10279e-05
Mogibacterium	0	0.00210598	1.90171e-05
Monaibacterium	0	0	8.00719e-06
Mongoliimonas	0	0	3.0027e-05
Mongoliitalea	0	1.97513e-05	0
Moorella	0.375533	0.528692	4.05763
Moorena	0	0	6.40575e-05
Moraxella	0.00067117	0.0489461	0.000859772
Morganella	0.000161081	0.000730797	1.0009e-05
Motiliproteus	0	0	3.80341e-05
Mucilaginibacter	0	0.00190847	3.50314e-05
Mucispirillum	0	3.45647e-05	0
Mumia	0	2.46891e-06	0.000588528
Muribaculum	0	0.000108632	0
Muricauda	0	9.87563e-06	0.00065759
Muriiphilus	0	0	1.20108e-05
Myceligenerans	0	0	8.00719e-06
Mycobacterium	0.00225513	0.0384162	0.0016655
Mycobacteroides	0.000375855	0.132259	0.000903811
Mycolicibacterium	2.68468e-05	0.0286862	0.000530476
Mycoplasmopsis	0	0.000195044	6.40575e-05
Myroides	0	0.000511064	0
Myxococcus	0	4.93782e-06	5.10458e-05
Myxosarcina	0	0	7.00629e-06
Naasia	0	0.000432059	0
Nakamurella	0	0.00130852	0
Natranaerobius	0	0	3.60323e-05
Natroniella	5.36936e-05	0	0.000148133
Natronincola	0	0	8.00719e-06
Natronohydrobacter	0	0	5.80521e-05
Natronospira	0	0	2.0018e-05
Naumannella	0	0.00133568	5.00449e-06
Nautilia	0	0	2.60234e-05
Negativibacillus	0	2.46891e-05	0
Neisseria	0.0140409	0.223905	0.000798717
Neobacillus	0	0	7.00629e-06
Neochlamydia	0	0	1.20108e-05
Neomegalonema	5.36936e-05	0.000217264	0.000607545
Neomicrococcus	2.68468e-05	0.00679937	0.00027825
Neorhizobium	0	0.00097275	0.000164147
Neotabrizicola	0	0	9.00809e-06
Neptunicoccus	0	2.22202e-05	0.00020018
Neptuniibacter	0	0	5.30476e-05
Neptunomonas	0	0	0.000330297
Nesterenkonia	0.000107387	0.0111693	0.00132619
Nevskia	0	7.15983e-05	4.70422e-05
Niabella	0	0.000153072	0
Niallia	0	0	4.30386e-05
Niastella	0	0.000217264	0
Nioella	0	0.000444403	2.80252e-05
Nisaea	0	0	2.20198e-05
Nitratireductor	0	5.4316e-05	0.00115804
Nitratiruptor	0	0	4.9044e-05
Nitriliruptor	8.05404e-05	0.000143197	0.000408367
Nitrincola	0.00410756	0.000582662	0.000347312
Nitrobacter	0	7.65362e-05	9.00809e-06
Nitrococcus	0	0	7.00629e-05
Nitrosococcus	0	4.93782e-06	0.000119107
Nitrosomonas	8.05404e-05	0.000464155	0.000495445
Nitrososphaera	0	0	0.000139125
Nitrosospira	0	0	2.90261e-05
Nitrospina	0	0	2.10189e-05
Nitrospira	2.68468e-05	0.00662161	6.70602e-05
Nitrospirillum	0	0.00192081	0
Nocardia	0.000268468	0.16777	0.000400359
Nocardioides	0.00821512	0.169602	0.00748872
Nocardiopsis	0	0.00463908	0.00142328
Nodosilinea	0	0	0.000388349
Nodularia	0	0.00655989	0
Nonlabens	0	0.000120977	0
Nonomuraea	0	0.00159491	2.30207e-05
Nostoc	5.36936e-05	0.00341944	0.00018917
Notoacmeibacter	0	6.91294e-05	0.000678609
Novibacillus	0	0	1.40126e-05
Noviherbaspirillum	0	0.000298738	0
Novipirellula	0	0	2.10189e-05
Novispirillum	0	0.000345647	0.000204183
Novosphingobium	0.00136919	0.0566269	0.0128025
Occallatibacter	0	0.000807333	0
Occultella	0	0	0.00017816
Oceanibacterium	0	2.46891e-06	0.000683614
Oceanibaculum	0.000724863	0.151105	0.0136012
Oceanibium	0	0	1.50135e-05
Oceanicaulis	8.05404e-05	6.17227e-05	0.00229206
Oceanicella	0	0	0.000361324
Oceanicola	0	4.93782e-06	0.00106195
Oceanidesulfovibrio	0.0176383	0.0248422	0.559741
Oceaniglobus	0	0	7.10638e-05
Oceaniovalibus	0	0	7.00629e-06
Oceaniradius	0	0	2.0018e-05
Oceanisphaera	0	4.93782e-05	0
Oceanispirochaeta	0	0	8.40755e-05
Oceanithermus	0	0	0.000146131
Oceanobacillus	0	0	3.0027e-05
Oceanotoga	0	0	0.000383344
Ochrobactrum	0	0.000187637	4.00359e-06
Octadecabacter	0	0.000197513	0.000547491
Odoribacter	0	0.0213536	1.90171e-05
Okeania	0	0	2.20198e-05
Oleibacter	0	0	1.90171e-05
Oleidesulfovibrio	0	0.00107644	0.000138124
Oleiharenicola	0	8.1474e-05	0
Oleispira	0	0	4.40395e-05
Oleomonas	0	0.000508595	2.0018e-06
Oligella	0.000778557	4.93782e-06	0.00472624
Olivibacter	0	1.72824e-05	0
Olsenella	0	2.46891e-05	2.20198e-05
Orenia	0	0	0.000322289
Oribacterium	0	7.90051e-05	0
Oricola	0.000644323	0.000335772	0.0235541
Ornatilinea	0	0	3.0027e-05
Ornithinimicrobium	0	9.87563e-05	1.0009e-05
Orrella	0	0.0234028	4.00359e-06
Oryzomonas	0	0	6.00539e-06
Oscillibacter	0	0.00117767	0
Ottowia	0.00732917	0.0162133	0.0180412
Oxalicibacterium	0	0.0056143	0
Oxalobacter	0	0	3.40305e-05
Pacificibacter	0	8.88807e-05	0.000147132
Pacificimonas	0	0	1.0009e-05
Pacificispira	0	2.46891e-06	3.20288e-05
Pacificitalea	0	0.000269111	1.80162e-05
Paenalcaligenes	0	0	0.000244219
Paenibacillus	0.0033827	0.00379718	0.00429385
Paeniglutamicibacter	0	0.00200969	7.00629e-06
Palaeococcus	0	7.65362e-05	4.00359e-06
Palleronia	0	0.000335772	3.10279e-05
Paludibacter	0	0	2.10189e-05
Panacagrimonas	0	0.000103694	8.00719e-06
Panacibacter	0	3.45647e-05	0
Pandoraea	0	0.0030886	0.000151136
Pannonibacter	0	0.0112928	0.000279251
Pantoea	5.36936e-05	0.0226103	0.000376338
Papillibacter	0	0	1.40126e-05
Parabacteroides	0	0.0513261	2.90261e-05
Paraburkholderia	0.000134234	0.0371669	0.00107296
Parachlamydia	0	1.23445e-05	0.00015614
Paracnuella	0	5.92538e-05	0
Paracoccus	0.000832251	0.301145	0.0105695
Paradesulfitobacterium	0	0.000199982	0.000616553
Paraferrimonas	0	0	2.50225e-05
Parageobacillus	0	0	0.00507456
Parahaliea	0	0	4.00359e-05
Paramaledivibacter	0	0	0.000430386
Paramesorhizobium	0	0.000333303	0
Parapedobacter	0	1.97513e-05	0
Paraperlucidibaca	0	8.88807e-05	0
Pararheinheimera	0	0.00054316	0
Pararhizobium	0	0	1.80162e-05
Pararhodobacter	0	1.23445e-05	0.000529475
Pararhodospirillum	0.000402702	0	9.9089e-05
Parasaccharibacter	5.36936e-05	2.7158e-05	1.0009e-06
Parasegetibacter	0	6.41916e-05	0
Parasphingopyxis	0	0.000298738	0
Parasphingorhabdus	0	0.000570318	1.40126e-05
Parenemella	0	0.000822146	0.000119107
Paroceanicella	0	0	0.000210189
Parvibaculum	0.00942322	0.727434	0.818969
Parvibium	0	0	4.10368e-05
Parvularcula	0.00136919	0.0071944	0.24559
Pasteurella	0.00209405	0.000992501	5.20467e-05
Patulibacter	0	0.00455514	0
Paucibacter	0	0.00381446	1.0009e-06
Paucidesulfovibrio	0	0	0.000193173
Pectobacterium	2.68468e-05	0.00768324	8.20737e-05
Pediococcus	0	0.000150603	0
Pedobacter	0	0.00364164	3.30297e-05
Pedosphaera	0	0.000108632	0
Pelagerythrobacter	0	2.46891e-06	0.000509457
Pelagibaca	0	0	1.50135e-05
Pelagibacterium	0	0.0012863	4.9044e-05
Pelagibius	0	0	7.30656e-05
Pelagicoccus	0	0	8.20737e-05
Pelagicola	0	0	0.000164147
Pelagimonas	0	0	8.00719e-06
Pelagivirga	0	0.00913743	0.000186167
Pelagovum	0	2.46891e-05	1.20108e-05
Pelobacter	0	7.90051e-05	0.000572514
Pelodictyon	0	0	2.70243e-05
Pelolinea	0	0.00768077	0.0167911
Pelomicrobium	0	0	0.000485436
Pelomonas	0.00147657	0.186886	0.00110599
Pelosinus	2.68468e-05	0.000140728	0.000160144
Pelotomaculum	0.00703386	0.0363917	0.0246231
Pelovirga	0	9.38185e-05	0.00117205
Peptoniphilus	0	0.0118952	0.000113102
Peribacillus	0	4.69093e-05	0
Perlucidibaca	0	0.0192106	0
Persephonella	0	0	7.00629e-06
Persicimonas	0.00185243	0.00114557	0.0885605
Petrimonas	0	0	0.000474426
Petrocella	0	0	1.0009e-05
Petroclostridium	0	0	0.00172855
Petrotoga	0.0154638	0.0141617	11.4675
Phaeobacter	0.000107387	0.00401691	0.00205885
Phaeodactylibacter	0	0	0.000471423
Phaeovulum	0	0	0.000454408
Phenylobacterium	0.000134234	0.153574	0.000539484
Phocaeicola	0	0.00657223	0
Phormidesmis	0	0	9.00809e-06
Phormidium	0	0	3.60323e-05
Phosphitispora	0	0	0.000713641
Photobacterium	0	4.93782e-06	3.30297e-05
Phreatobacter	0	0	3.50314e-05
Phycicoccus	0	1.48134e-05	2.0018e-06
Phycisphaera	0	2.7158e-05	0.000332298
Phycocomes	0	4.93782e-06	0.000123111
Phyllobacterium	8.05404e-05	0.018386	0.000142128
Phytoactinopolyspora	0	0.00278493	0
Pigmentiphaga	0	0.00022714	9.20827e-05
Pikeienuella	0	0	3.50314e-05
Pimelobacter	0	0.000103694	8.00719e-06
Pinisolibacter	0	0	0.000226203
Pirellula	0	0.000103694	0
Planctomicrobium	0	7.65362e-05	6.00539e-06
Planctomyces	0	0	2.60234e-05
Planifilum	0	0.000175292	7.40665e-05
Planktotalea	0	7.15983e-05	6.60593e-05
Planococcus	5.36936e-05	0.00508595	3.0027e-06
Plantibacter	0	0	1.90171e-05
Pleomorphomonas	0	0	0.000142128
Plesiomonas	0	0.000298738	0.000502451
Pluralibacter	0.000617476	0.000906089	0.0171924
Polaribacter	0	2.46891e-05	2.20198e-05
Polaromonas	0.000134234	0.00613524	0.000272244
Polycyclovorans	0	3.70336e-05	0.00024522
Polymorphum	0	2.96269e-05	0.000279251
Polynucleobacter	0.000698017	0.00383668	0.000228205
Pontibaca	0	0	3.40305e-05
Pontibacter	0	0.00198006	2.0018e-05
Pontibrevibacter	0	0	2.0018e-05
Ponticaulis	0.000349008	0	0.00197077
Ponticoccus	0	1.23445e-05	0.000231208
Pontiella	0	0	4.70422e-05
Pontimonas	5.36936e-05	0.00909546	0.000124111
Pontivivens	0	1.48134e-05	0
Porphyrobacter	0	0.0600043	4.00359e-05
Porphyromonas	0	0.00650064	1.20108e-05
Porticoccus	0	0	0.000213191
Poseidonocella	5.36936e-05	9.87563e-06	0.000410368
Posidoniimonas	0	0	0.000318286
Povalibacter	0	2.46891e-05	8.00719e-06
Prauserella	0	0.000456748	1.0009e-05
Prevotella	2.68468e-05	0.0177243	0.000271243
Pricia	0	0	1.50135e-05
Priestia	0	0.000449341	5.9053e-05
Primorskyibacter	0.000322161	0.000804864	0.0143189
Prolixibacter	0	0	0.0003343
Promicromonospora	0	0.00137024	0.000108097
Propionibacterium	0.000590629	0.0204549	0.00020018
Propioniciclava	0	0.000518471	2.40216e-05
Propioniferax	0	4.44403e-05	0
Propionivibrio	0	0	2.40216e-05
Propylenella	2.68468e-05	1.48134e-05	0.000787707
Prosthecobacter	2.68468e-05	0.00018023	0
Prosthecochloris	0	0	0.000130117
Prosthecomicrobium	0	0	8.00719e-06
Proteiniclasticum	0.00214774	7.40672e-06	0.000266239
Proteiniphilum	0	0.00199735	0.000851765
Proteus	0.370029	0.00973737	0.000499448
Providencia	0.000402702	1.23445e-05	2.0018e-06
Pseudacidobacterium	0	0	0.000233209
Pseudactinotalea	0	0	1.60144e-05
Pseudaminobacter	0	0.00027158	3.0027e-06
Pseudarthrobacter	2.68468e-05	0.00236768	2.70243e-05
Pseudenhygromyxa	0	0	6.00539e-06
Pseudidiomarina	0	0	6.00539e-06
Pseudoalteromonas	0.715897	0.00111101	0.000339305
Pseudobacteriovorax	0	0	6.00539e-06
Pseudobacteroides	0	0	8.00719e-06
Pseudobdellovibrio	0	0.00144184	0
Pseudochelatococcus	0	0	8.00719e-06
Pseudochrobactrum	0	1.97513e-05	0
Pseudoclavibacter	0	0.00101225	0.000264237
Pseudoclostridium	0	0	5.30476e-05
Pseudodesulfovibrio	2.68468e-05	0.00312811	0.00157942
Pseudodonghicola	0.000349008	0.000199982	0.017789
Pseudoflavonifractor	0	0.00147394	0
Pseudogemmobacter	0	1.48134e-05	0.000352316
Pseudohalocynthiibacter	0	0	1.20108e-05
Pseudohoeflea	0	0.00266889	4.70422e-05
Pseudolabrys	0	0	0.000353317
Pseudolysinimonas	0	0	0.000762685
Pseudomaricurvus	0	0	5.00449e-06
Pseudomethylobacillus	0	4.93782e-05	0
Pseudomonas	20.0002	3.68316	0.778518
Pseudonocardia	5.36936e-05	0.0145073	0.000960863
Pseudooceanicola	0.000107387	4.93782e-05	0.00314082
Pseudoprimorskyibacter	0	0	5.9053e-05
Pseudoramibacter	0	0.000108632	0
Pseudorhizobium	0.000483242	0.00486128	0.000663596
Pseudorhodobacter	0	4.93782e-06	1.80162e-05
Pseudorhodoferax	0.000161081	0.00811777	0.000116104
Pseudorhodoplanes	0	0.0316045	0.000158142
Pseudorivibacter	0	0.000118508	0
Pseudoroseicyclus	0	0	1.10099e-05
Pseudoruegeria	2.68468e-05	0.00024936	0.00429285
Pseudosulfitobacter	0	0.000508595	0.000458412
Pseudothermotoga	0.217754	1.33332	3.46935
Pseudovibrio	0	1.97513e-05	7.00629e-05
Pseudoxanthomonas	0.00233567	0.00593772	0.000457411
Psychrobacter	0.000161081	0.0177761	0.000138124
Psychroflexus	0	0.000592538	7.40665e-05
Psychroserpens	0	0	1.70153e-05
Puerhibacterium	0	0	1.0009e-05
Pukyongiella	0	0	1.0009e-06
Puniceibacterium	0	4.19714e-05	0.000567509
Pusillimonas	0.000295315	0.260517	0.00299969
Pyramidobacter	0	0	0.000154138
Pyrococcus	0.000778557	0.0067895	0.000183164
Pyrodictium	0	5.92538e-05	0
Pyruvatibacter	0	0	0.000157141
Pyxidicoccus	0	0	1.10099e-05
Qingshengfaniella	0	0	1.70153e-05
Qipengyuania	0	0.000441935	0
Quisquiliibacterium	0	7.40672e-06	0.000135121
Raineyella	0.000241621	7.15983e-05	0.000862775
Ralstonia	0.109696	1.31944	0.0194815
Ramlibacter	0	0.0129618	0.00010009
Raoultella	0	0.00256273	7.20647e-05
Rathayibacter	8.05404e-05	4.69093e-05	0.000607545
Renibacterium	0	4.69093e-05	1.0009e-05
Reyranella	0	0.00110854	0.000233209
Rhabdochromatium	0	0	2.10189e-05
Rheinheimera	0	0.000755486	1.70153e-05
Rhizobacter	0	0.00070117	0
Rhizobium	0.183095	0.260922	0.00598838
Rhizorhabdus	0	0.000145666	3.20288e-05
Rhodanobacter	0	0.000436997	5.70512e-05
Rhodobacter	0	0.00112335	0.00148233
Rhodobaculum	0	0	1.0009e-05
Rhodobium	0.000322161	7.15983e-05	0.00818735
Rhodoblastus	0	0	2.60234e-05
Rhodocaloribacter	0	4.69093e-05	1.30117e-05
Rhodococcus	0.00118126	0.390379	0.00753677
Rhodocytophaga	0	0.000288862	1.0009e-06
Rhodoferax	0	0.00449835	5.10458e-05
Rhodohalobacter	0	0	4.50404e-05
Rhodoligotrophos	0.000107387	1.72824e-05	0.000243218
Rhodoluna	0	0.0017307	1.70153e-05
Rhodomicrobium	0	0.000659199	0.000283254
Rhodopirellula	0	0.000533284	0.00344109
Rhodoplanes	0	2.96269e-05	5.40485e-05
Rhodopseudomonas	0	0.000103694	0.00014513
Rhodosalinus	0	0	0.000173155
Rhodospira	8.05404e-05	0	8.00719e-06
Rhodospirillum	0	0.000128383	0.000379341
Rhodothalassium	0	0	0.000338304
Rhodothermus	0	3.20958e-05	0.00045641
Rhodovarius	0	0.000106163	0
Rhodovibrio	0	0	0.000258232
Rhodovulum	5.36936e-05	0.0310342	0.00503252
Richelia	0	0	9.50854e-05
Rickettsia	0	0.000209857	1.80162e-05
Rickettsiella	0	0.00225658	0
Rivicola	0	0	1.80162e-05
Rivularia	0	0	3.80341e-05
Robbsia	0	0.00108138	0
Robiginitomaculum	0	0	5.30476e-05
Roseateles	0	0.0136358	1.20108e-05
Roseburia	0	0.000357992	0
Roseibaca	0	2.46891e-06	0.000581522
Roseibacillus	0	0	1.50135e-05
Roseibacterium	0	0	8.00719e-06
Roseibium	0.000107387	0.000106163	0.00370633
Roseicella	0	0.00054316	0
Roseicitreum	0	1.48134e-05	2.30207e-05
Roseiconus	0	0	8.00719e-06
Roseicyclus	0	0	0.000191172
Roseiflexus	0	0.000446872	0.000188169
Roseimaritima	0	0	0.000399359
Roseimicrobium	0	0.000809802	0
Roseinatronobacter	0	0	1.40126e-05
Roseisalinus	0	0	0.000618555
Roseitalea	0	0	3.30297e-05
Roseitranquillus	0	0	0.000119107
Roseivivax	0	0	0.000666598
Rosenbergiella	0	0.000555504	0
Roseobacter	0.000187928	9.87563e-05	0.000919826
Roseomonas	0.000161081	0.0134852	0.000449403
Roseospira	0	1.48134e-05	0.00137924
Roseospirillum	0	0	0.00024522
Roseovarius	14.2558	3.19042	1.41631
Rosistilla	0	0	6.10548e-05
Rothia	0.000912791	0.195409	0.000118106
Rouxiella	0	0.0013579	0
Ruania	0	0	2.40216e-05
Rubellimicrobium	0	0.000854242	0.000110099
Rubrimonas	0	0	5.20467e-05
Rubrivivax	0.000617476	0.0027553	0.00184666
Rubrobacter	0	0.0205487	0.000291261
Rudaea	0	0.000461686	0
Ruegeria	0.000402702	0.00626609	0.0265598
Rufibacter	0	0.00126408	0
Ruficoccus	2.68468e-05	0	0.000932837
Ruminiclostridium	0	9.38185e-05	0.000594534
Ruminococcus	0	0.00117026	5.40485e-05
Runella	0	9.87563e-06	0
Ruthenibacterium	0	0.000350585	0
Saccharibacillus	0	0.000150603	0
Saccharicrinis	0	0	1.0009e-05
Saccharomonospora	0	0.000715983	0.000103093
Saccharophagus	0	0.00320958	3.0027e-06
Saccharopolyspora	0	0.000165417	0
Sagittula	0	0.000237015	4.30386e-05
Salaquimonas	0	0	1.20108e-05
Salibaculum	0	0	0.000201181
Salidesulfovibrio	0	0	3.70332e-05
Salimicrobium	0	0.000372805	1.90171e-05
Salinarimonas	0	0.000278987	5.00449e-05
Salinibacter	0	0	8.00719e-06
Salinibacterium	0	0.000101225	9.40845e-05
Salinicoccus	0	0.00205413	3.0027e-06
Salinicola	0	0	1.0009e-05
Salinihabitans	0	0	0.000154138
Salinimicrobium	0	0.000224671	0.000524471
Salinisphaera	0	0	0.000381342
Salinispira	0	0	0.000321288
Salinivibrio	0	0.000409839	4.50404e-05
Salinivirga	0	0	2.60234e-05
Salipiger	0.00606737	0.0127643	0.335532
Salirhabdus	0	0	1.20108e-05
Salmonella	0	0.00060982	0
Salsipaludibacter	0	9.87563e-06	0
Sandaracinobacter	0	0	1.40126e-05
Sandaracinobacteroides	0	0.000469093	0
Sandaracinus	0	0	3.40305e-05
Sandarakinorhabdus	0	0.000182699	0
Sanguibacter	0	0	1.0009e-05
Schaalia	2.68468e-05	0.000395025	0
Schlegelella	0	7.40672e-05	4.50404e-05
Schleiferia	0	0	3.9035e-05
Schnuerera	0	0	0.000115103
Schumannella	0	0	1.40126e-05
Sebaldella	0	0	4.60413e-05
Sedimentibacter	0	0	7.50674e-05
Sedimenticola	0	5.18471e-05	0.0002232
Sedimentisphaera	0	0	0.000648582
Sedimentitalea	0	0	6.00539e-06
Sediminibacterium	0	0.00383915	0
Sediminimonas	0	0	9.00809e-05
Sediminispirochaeta	0	9.38185e-05	0.00805623
Segnochrobactrum	0	0	4.00359e-06
Selenihalanaerobacter	0	0.000580193	2.60234e-05
Seleniivibrio	0	0.000590069	1.0009e-05
Selenomonas	0	0.000162948	0
Seohaeicola	0	9.87563e-06	0.00047943
Seongchinamella	0	0	1.80162e-05
Serinibacter	0	9.13496e-05	2.0018e-06
Serpentinimonas	0	0	1.10099e-05
Serratia	0.000161081	0.0225708	0.00562005
Shewanella	0.00351693	0.0659495	0.000698627
Shigella	0.000536936	0.00195044	0.000162146
Shimia	0	1.48134e-05	0.000942846
Shinella	0	0.023904	4.30386e-05
Siccationidurans	0	9.87563e-06	1.80162e-05
Siccirubricoccus	0	6.91294e-05	9.00809e-05
Siculibacillus	0	0	4.00359e-06
Sideroxydans	0	4.93782e-05	0
Silicimonas	0	0	2.30207e-05
Simkania	0	0.000506126	0.000433389
Sinanaerobacter	0	0	1.30117e-05
Sinimarinibacterium	0	0	0.000355319
Sinirhodobacter	0	3.45647e-05	0.00102092
Sinobaca	0	9.87563e-06	0
Sinorhizobium	0	0.000392556	0.000692622
Siphonobacter	0	1.97513e-05	0
Skermanella	2.68468e-05	0.00563899	7.30656e-05
Smithella	2.68468e-05	0.0430849	0.129955
Sneathiella	0	0.000103694	0.000263236
Sodalis	0	0	9.20827e-05
Soehngenia	0	0.000311082	3.10279e-05
Solibacillus	0	0.000170355	0
Solimonas	0	0.000308614	0.000196176
Solirhodobacter	0	0	0.000170153
Solirubrobacter	5.36936e-05	0.00036293	1.10099e-05
Solobacterium	0	9.87563e-06	0
Sorangium	0	0	0.000146131
Sphaerisporangium	0	0	1.20108e-05
Sphaerobacter	0	2.46891e-06	9.20827e-05
Sphaerochaeta	0	0.0107299	0.0117115
Sphingobacterium	0	0.00606858	0
Sphingobium	0.235178	0.0449366	0.000693623
Sphingomicrobium	0	0	3.9035e-05
Sphingomonas	0.0033827	0.538661	0.00997395
Sphingopyxis	0.000214774	0.033745	0.000307276
Sphingorhabdus	0	0.00637966	1.70153e-05
Sphingosinicella	0	3.45647e-05	9.60863e-05
Sphingosinithalassobacter	0	0	1.90171e-05
Spiractinospora	0	0.000116039	0
Spiribacter	0	9.87563e-06	0.000970872
Spirochaeta	0.000375855	0.00356017	0.123767
Spirosoma	0	0.00285406	0
Spongiibacter	0	3.95025e-05	0
Sporichthya	0	6.17227e-05	0
Sporobacter	0	0.0002938	0
Sporohalobacter	0	0	7.70692e-05
Sporolactobacillus	5.36936e-05	0.000449341	1.70153e-05
Sporomusa	0	0	0.000124111
Sporosarcina	0	2.46891e-05	1.10099e-05
Sporotomaculum	0	0	0.00027825
Stakelama	0	0.00092831	0
Staphylococcus	0.006658	0.0892881	0.0159553
Staphylothermus	0	0	9.80881e-05
Stappia	0.000241621	0.00099497	0.00673405
Starkeya	0	9.87563e-05	6.9062e-05
Stella	0	0	9.00809e-06
Stenotrophomonas	0.0053962	0.676111	0.0186598
Steroidobacter	0	0.00166898	6.00539e-06
Sterolibacterium	0	0	2.0018e-05
Stomatobaculum	0	1.97513e-05	0
Streptobacillus	0	9.38185e-05	0
Streptococcus	0.940873	0.159032	0.00589329
Streptomyces	0.00518143	0.0611549	0.00187468
Streptosporangium	0.000134234	0.00269111	0.000229206
Subdoligranulum	0	0.000244422	0
Subsaximicrobium	0	0	1.30117e-05
Sulfidibacter	0	0	1.20108e-05
Sulfitobacter	0	0.00170602	0.00153037
Sulfobacillus	0	0	5.70512e-05
Sulfolobus	0	8.88807e-05	0
Sulfuricella	0	0.00192575	8.40755e-05
Sulfuricurvum	0	2.46891e-05	2.30207e-05
Sulfuriferula	0	0	0.000140126
Sulfurihydrogenibium	0	0	0.000277249
Sulfurimonas	0.0250212	0.000222202	9.60863e-05
Sulfuritalea	0	0.000676481	0.000249224
Sulfuritortus	0	0	2.80252e-05
Sulfurivermis	2.68468e-05	0.0113471	0.00151136
Sulfurivirga	0	0	0.00015614
Sulfurospirillum	0.196411	0.0301207	2.40216e-05
Sulfurovum	0	0	0.000162146
Sunxiuqinia	0	0	9.20827e-05
Sutterella	2.68468e-05	0.00054316	4.00359e-05
Symbiobacterium	8.05404e-05	0.000377743	8.80791e-05
Symmachiella	0	0	5.30476e-05
Symploca	0	0	6.00539e-06
Synechococcus	0	0	2.60234e-05
Syntrophaceticus	0.000456395	0.00169367	0.000136122
Syntrophobacter	0	1.48134e-05	0.000549493
Syntrophobotulus	0	0	3.10279e-05
Syntrophomonas	0.000429549	0.000229608	0.000903811
Syntrophorhabdus	5.36936e-05	0.00309354	0.00260434
Syntrophotalea	0.000563783	0.00521927	0.0190671
Syntrophothermus	0.0163497	0.0326266	0.00373736
Syntrophus	0	0.000651792	0.00281453
Szabonella	0	0	6.80611e-05
Tabrizicola	0	0.000128383	0.000196176
Tahibacter	0	7.65362e-05	0
Taibaiella	0	2.96269e-05	1.40126e-05
Tamaricihabitans	0	7.15983e-05	0
Tangfeifania	0	3.45647e-05	0.000101091
Tannerella	0	0.00251582	0
Tardibacter	0	0	6.00539e-06
Tardiphaga	0	0.000128383	0
Tateyamaria	0	0	6.60593e-05
Tatlockia	0	0	1.60144e-05
Tautonia	0	3.70336e-05	0.000358322
Taylorella	0	0	2.0018e-05
Telmatocola	0	0	0.00175958
Telmatospirillum	0	0	8.20737e-05
Tenacibaculum	0	0	3.70332e-05
Tenggerimyces	0	0	9.00809e-06
Tengunoibacter	0	0	5.00449e-05
Tenuifilum	0	0.00136531	4.80431e-05
Tepidamorphus	0	4.93782e-06	0.000274246
Tepidanaerobacter	0.102957	0.00196278	2.59417
Tepidibacillus	0	0	8.10728e-05
Tepidibacter	0	0	0.000146131
Tepidicaulis	0	0.000111101	0
Tepidicella	0	0	0.000726652
Tepidimicrobium	0	0	4.9044e-05
Tepidimonas	0.000241621	0.0209635	0.00223501
Tepidiphilus	0.053613	0.530309	0.228569
Tepidisphaera	0	0	0.000277249
Tepiditoga	0	0	1.60144e-05
Terasakiella	0	0	1.20108e-05
Terriglobus	0	0.00040737	0
Terrihabitans	0	0	2.0018e-05
Terrimonas	0	0.000387619	0
Tessaracoccus	0.375667	0.00652779	0.000369332
Tetrasphaera	0	0.000940654	1.0009e-06
Thalassobacillus	0	0	2.0018e-06
Thalassobacter	0	0.000841898	0.0001111
Thalassobaculum	0	0	0.000970872
Thalassobium	0	0	1.80162e-05
Thalassobius	5.36936e-05	7.90051e-05	0.00159843
Thalassococcus	0	0	0.00012211
Thalassolituus	0	1.48134e-05	0.000524471
Thalassomonas	0	0	0.000169152
Thalassorhabdomicrobium	0	0	0.000369332
Thalassospira	0.0037317	0.00226646	0.0197127
Thalassotalea	0	0.000888807	3.20288e-05
Thauera	0.00107387	0.00786841	0.000164147
Thermacetogenium	0.0567541	0.191982	0.00659892
Thermaerobacter	0.00123495	0.000861649	0.000360323
Thermanaeromonas	0.0221486	0.00403913	0.0413872
Thermanaerosceptrum	0.000187928	2.46891e-06	0.00153137
Thermanaerothrix	0.000107387	0.0661396	0.000761684
Thermanaerovibrio	5.36936e-05	4.93782e-05	0.00535381
Thermicanus	0	0.000155541	1.90171e-05
Thermincola	0	0.00365398	0.00159543
Thermoanaerobacter	0.000483242	0.000614758	0.00637672
Thermoanaerobacterium	5.36936e-05	0.000140728	0.00112501
Thermoclostridium	0.000375855	2.46891e-05	0.000847761
Thermococcus	0.0381761	29.4034	0.08019
Thermodesulfatator	0	0	3.50314e-05
Thermodesulfitimonas	0.0125106	4.93782e-06	0.000275247
Thermodesulfobacterium	0.195498	0.000298738	0.00423981
Thermodesulfobium	0	0	0.000118106
Thermodesulforhabdus	2.68468e-05	0.00626362	0.0217976
Thermodesulfovibrio	0.0122958	0.0668482	0.245799
Thermofilum	0	3.70336e-05	0.000729655
Thermoflavifilum	0	0.000128383	0.000121109
Thermoflexus	0	0.00121717	0.00127414
Thermogemmata	0	0	5.10458e-05
Thermogemmatispora	0	0	1.40126e-05
Thermogutta	0.000617476	0.215889	0.358297
Thermoleophilum	0	0	0.000446401
Thermomonas	0	0	3.50314e-05
Thermopetrobacter	0	0	6.40575e-05
Thermosediminibacter	0.00233567	9.87563e-06	0.00136322
Thermosinus	0	0	9.9089e-05
Thermosipho	0.00214774	0.00175786	0.360478
Thermosporothrix	0	0	1.80162e-05
Thermosulfurimonas	2.68468e-05	0	0.000152137
Thermosynechococcus	0	0.000283924	0
Thermosyntropha	0.000778557	0.0120359	0.00571313
Thermotalea	0	1.48134e-05	0.000396356
Thermotoga	0.0243232	0.105161	0.0376088
Thermovenabulum	0	0	1.20108e-05
Thermovirga	0.00201351	0.00636485	0.266888
Thermus	0.000214774	0.0306515	0.00282053
Thioalbus	0.0215848	0.025805	0.117184
Thioalkalivibrio	0.000241621	0.00108138	0.00718445
Thiobacillus	0.00182558	0.00124927	0.0216675
Thiocapsa	0	0	0.000106095
Thioclava	0.00724863	0.327792	0.231792
Thiococcus	0	0	4.60413e-05
Thiocystis	0	0	7.00629e-06
Thiodictyon	0	0	3.20288e-05
Thioflavicoccus	0	0	6.00539e-06
Thiogranum	0	0	5.9053e-05
Thiohalobacter	0.0113025	0.00310836	0.0953676
Thiohalocapsa	0	0	4.00359e-06
Thiohalomonas	0	0	0.00128415
Thiohalophilus	0	0	8.50764e-05
Thiohalorhabdus	0	0	7.00629e-06
Thiolapillus	0	0	0.00013412
Thiomicrorhabdus	0	3.70336e-05	0.000947851
Thiomicrospira	2.68468e-05	7.40672e-06	0.00848862
Thiomonas	0	0	3.20288e-05
Thiopseudomonas	0	6.66605e-05	0
Thiosulfatihalobacter	0	0	7.10638e-05
Thiosulfativibrio	0	0	1.80162e-05
Thiothrix	0	3.45647e-05	0.000183164
Tibeticola	0	0.000274049	2.0018e-06
Tichowtungia	0	0	5.10458e-05
Tidjanibacter	0	3.45647e-05	0
Tindallia	0	0.000209857	0.000116104
Tissierella	0	0	2.80252e-05
Tistlia	0.0217727	0.0376434	0.350979
Tistrella	0.000187928	0.0386829	0.00439495
Trabulsiella	0	1.72824e-05	0
Tranquillimonas	0	4.93782e-06	0.000606545
Treponema	0	0.0093226	0.00183164
Trichlorobacter	0	0	3.70332e-05
Trichococcus	0	0	1.60144e-05
Trichormus	0	9.87563e-06	0
Tritonibacter	0	0.000116039	0.000780701
Tropicibacter	0	3.95025e-05	0.000381342
Tropicimonas	0	0	2.0018e-05
Truepera	0	0.00116039	6.50584e-05
Tsukamurella	0	0.000419714	4.00359e-06
Tsuneonella	0	0.000177761	0
Tumebacillus	0	0	1.10099e-05
Turneriella	0	4.44403e-05	0
Tuwongella	0	0.00099497	0
Uliginosibacterium	0	3.20958e-05	0
Undibacterium	0	0.00370583	6.00539e-06
Ureibacillus	0.000107387	0.00244422	2.80252e-05
Vagococcus	0	0.0016517	0
Vallitalea	0	0	0.000139125
Vampirovibrio	0	0.000441935	0
Varibaculum	0	0.00262445	1.0009e-06
Variibacter	0	2.22202e-05	0
Variovorax	0.00322161	0.102724	0.00117505
Varunaivibrio	0	0	2.20198e-05
Veillonella	0	0.00456501	0.000184165
Verminephrobacter	0	0.000713514	4.00359e-06
Veronia	0	0.000103694	0
Vibrio	1.55236	0.112279	0.0010019
Vicingus	0	0	8.00719e-06
Victivallis	0	0	4.60413e-05
Vineibacter	0	4.93782e-05	0
Virgibacillus	8.05404e-05	0.00461439	1.50135e-05
Vitreoscilla	0	0.00047403	0
Vogesella	0	0.000311082	3.60323e-05
Waddlia	0.000402702	0.0129247	0.000195175
Weissella	0	0.000943123	0.000148133
Weizmannia	0	0.00215042	5.10458e-05
Wenzhouxiangella	5.36936e-05	0.00724871	0.00152637
Williamsia	2.68468e-05	0.00103694	8.30746e-05
Winogradskyella	0	0	1.20108e-05
Woodsholea	0	0	6.00539e-06
Xanthobacter	0.000214774	0.017275	0.00206485
Xanthomonas	0.000107387	0.0535383	0.000424381
Xenophilus	0	9.87563e-05	0.000217195
Xinfangfangia	0	0	1.10099e-05
Xylella	0	4.19714e-05	0
Xylophilus	0.000536936	0.0012468	9.00809e-06
Yangia	0	4.93782e-06	0.000611549
Yeguia	0	9.87563e-06	0
Yeosuana	0.0144973	0.000301207	0.000393353
Yersinia	0	3.70336e-05	0
Yimella	0	0.000824615	4.00359e-06
Yokenella	0	0.00013579	0
Yoonia	8.05404e-05	0.0100213	0.000129116
Youngiibacter	0.000375855	0	5.70512e-05
Zavarzinella	0	0.00105422	0
Zavarzinia	0	6.41916e-05	0.000171154
Zeimonas	0	0	2.60234e-05
Zhaonella	0.00343639	0.0015011	0.6784
Zhengella	0	0	0.000215193
Zhongshania	0	0.000209857	0
Zhouia	0	0	2.0018e-06
Zobellella	0	0.000770299	0
Zobellia	5.36936e-05	0.000599945	0.000119107
Zoogloea	5.36936e-05	0.00142703	1.70153e-05
Zunongwangia	0	0	9.00809e-06
Zymomonas	0	0.000167886	0

## Sheet: get
superkingdom	kingdom	phylum	class	order	family	genus	species	query	rank	status
Bacteria		Bacillota	Bacilli	Lactobacillales	Aerococcaceae	Abiotrophia	1	Abiotrophia	genus	Ok
Bacteria		Bacillota	Bacilli	Lactobacillales	Lactobacillaceae	Acetilactobacillus	1	Acetilactobacillus	genus	Ok
Bacteria		Bacillota	Clostridia	Eubacteriales	Oscillospiraceae	Acetivibrio	1	Acetivibrio	genus	Ok
Bacteria		Pseudomonadota	Alphaproteobacteria	Rhodospirillales	Acetobacteraceae	Acetobacter	1	Acetobacter	genus	Ok
Bacteria		Bacillota	Clostridia	Eubacteriales	Eubacteriaceae	Acetobacterium	1	Acetobacterium	genus	Ok
Bacteria		Bacillota	Clostridia	Halanaerobiales	Halobacteroidaceae	Acetohalobium	1	Acetohalobium	genus	Ok
Bacteria		Synergistota	Synergistia	Synergistales	Acetomicrobiaceae	Acetomicrobium	1	Acetomicrobium	genus	Ok
Bacteria		Bacillota	Negativicutes	Selenomonadales	Sporomusaceae	Acetonema	1	Acetonema	genus	Ok
Bacteria		Mycoplasmatota	Mollicutes	Acholeplasmatales	Acholeplasmataceae	Acholeplasma	1	Acholeplasma	genus	Ok
Bacteria		Pseudomonadota	Gammaproteobacteria	Thiotrichales	Thiotrichaceae	Achromatium	1	Achromatium	genus	Ok
Bacteria		Pseudomonadota	Betaproteobacteria	Burkholderiales	Alcaligenaceae	Achromobacter	1	Achromobacter	genus	Ok
Bacteria		Bacillota	Clostridia	Eubacteriales	Eubacteriales Family XII. Incertae Sedis	Acidaminobacter	1	Acidaminobacter	genus	Ok
Bacteria		Bacillota	Negativicutes	Acidaminococcales	Acidaminococcaceae	Acidaminococcus	1	Acidaminococcus	genus	Ok
Bacteria		Pseudomonadota	Gammaproteobacteria	Acidiferrobacterales	Acidiferrobacteraceae	Acidiferrobacter	1	Acidiferrobacter	genus	Ok
Bacteria		Pseudomonadota	Gammaproteobacteria	Chromatiales	Ectothiorhodospiraceae	Acidihalobacter	1	Acidihalobacter	genus	Ok
Bacteria		Pseudomonadota	Alphaproteobacteria	Rhodobacterales	Paracoccaceae	Acidimangrovimonas	1	Acidimangrovimonas	genus	Ok
Bacteria		Pseudomonadota	Alphaproteobacteria	Rhodospirillales	Acetobacteraceae	Acidiphilium	1	Acidiphilium	genus	Ok
Archaea		Candidatus Thermoplasmatota	Thermoplasmata	Thermoplasmatales	Ferroplasmaceae	Acidiplasma	1	Acidiplasma	genus	Ok
Bacteria		Actinomycetota	Actinomycetes	Propionibacteriales	Propionibacteriaceae	Acidipropionibacterium	1	Acidipropionibacterium	genus	Ok
Bacteria		Pseudomonadota	Alphaproteobacteria	Rhodospirillales	Acetobacteraceae	Acidisphaera	1	Acidisphaera	genus	Ok
Bacteria		Pseudomonadota	Acidithiobacillia	Acidithiobacillales	Acidithiobacillaceae	Acidithiobacillus	1	Acidithiobacillus	genus	Ok
Bacteria		Actinomycetota	Actinomycetes	Acidothermales	Acidothermaceae	Acidothermus	1	Acidothermus	genus	Ok
Bacteria		Pseudomonadota	Betaproteobacteria	Burkholderiales	Comamonadaceae	Acidovorax	1	Acidovorax	genus	Ok
Archaea		Candidatus Thermoplasmatota				Aciduliprofundum	1	Aciduliprofundum	genus	Ok
Bacteria		Pseudomonadota	Gammaproteobacteria	Moraxellales	Moraxellaceae	Acinetobacter	1	Acinetobacter	genus	Ok
Bacteria		Pseudomonadota	Alphaproteobacteria	Rhodobacterales	Roseobacteraceae	Actibacterium	1	Actibacterium	genus	Ok
Bacteria		Actinomycetota	Actinomycetes	Streptosporangiales	Thermomonosporaceae	Actinoallomurus	1	Actinoallomurus	genus	Ok
Bacteria		Actinomycetota	Actinomycetes	Streptosporangiales	Thermomonosporaceae	Actinomadura	1	Actinomadura	genus	Ok
Bacteria		Actinomycetota	Acidimicrobiia	Acidimicrobiales	Iamiaceae	Actinomarinicola	1	Actinomarinicola	genus	Ok
Bacteria		Actinomycetota	Actinomycetes	Actinomycetales	Actinomycetaceae	Actinomyces	1	Actinomyces	genus	Ok
Bacteria		Actinomycetota	Actinomycetes	Pseudonocardiales	Pseudonocardiaceae	Actinomycetospora	1	Actinomycetospora	genus	Ok
Bacteria		Actinomycetota	Actinomycetes	Pseudonocardiales	Pseudonocardiaceae	Actinophytocola	1	Actinophytocola	genus	Ok
Bacteria		Actinomycetota	Actinomycetes	Micromonosporales	Micromonosporaceae	Actinoplanes	1	Actinoplanes	genus	Ok
Bacteria		Actinomycetota	Actinomycetes	Propionibacteriales	Actinopolymorphaceae	Actinopolymorpha	1	Actinopolymorpha	genus	Ok
Bacteria		Actinomycetota	Actinomycetes	Micrococcales	Cellulomonadaceae	Actinotalea	1	Actinotalea	genus	Ok
Bacteria		Pseudomonadota	Alphaproteobacteria	Hyphomicrobiales	Amorphaceae	Acuticoccus	1	Acuticoccus	genus	Ok
Bacteria		Bacteroidota	Cytophagia	Cytophagales	Hymenobacteraceae	Adhaeribacter	1	Adhaeribacter	genus	Ok
Bacteria		Pseudomonadota	Betaproteobacteria	Burkholderiales	Alcaligenaceae	Advenella	1	Advenella	genus	Ok
Bacteria		Planctomycetota	Planctomycetia	Pirellulales	Lacipirellulaceae	Aeoliella	1	Aeoliella	genus	Ok
Bacteria		Pseudomonadota	Gammaproteobacteria	Cellvibrionales	Halieaceae	Aequoribacter	1	Aequoribacter	genus	Ok
Bacteria		Bacteroidota	Flavobacteriia	Flavobacteriales	Flavobacteriaceae	Aequorivita	1	Aequorivita	genus	Ok
Bacteria		Actinomycetota	Actinomycetes	Bifidobacteriales	Bifidobacteriaceae	Aeriscardovia	1	Aeriscardovia	genus	Ok
Bacteria		Bacillota	Bacilli	Lactobacillales	Aerococcaceae	Aerococcus	1	Aerococcus	genus	Ok
Bacteria		Actinomycetota	Actinomycetes	Propionibacteriales	Nocardioidaceae	Aeromicrobium	1	Aeromicrobium	genus	Ok
Bacteria		Pseudomonadota	Gammaproteobacteria	Aeromonadales	Aeromonadaceae	Aeromonas	1	Aeromonas	genus	Ok
Bacteria		Pseudomonadota	Gammaproteobacteria	Xanthomonadales	Rhodanobacteraceae	Aerosticca	1	Aerosticca	genus	Ok
Bacteria		Pseudomonadota	Gammaproteobacteria	Cellvibrionales	Cellvibrionaceae	Aestuariicella	1	Aestuariicella	genus	Ok
Bacteria		Pseudomonadota	Alphaproteobacteria	Rhodobacterales	Paracoccaceae	Aestuariicoccus	1	Aestuariicoccus	genus	Ok
Bacteria		Actinomycetota	Actinomycetes	Propionibacteriales	Propionibacteriaceae	Aestuariimicrobium	1	Aestuariimicrobium	genus	Ok
Bacteria		Pseudomonadota	Alphaproteobacteria	Hyphomicrobiales	Aestuariivirgaceae	Aestuariivirga	1	Aestuariivirga	genus	Ok
Bacteria		Pseudomonadota	Alphaproteobacteria	Rhodobacterales	Paracoccaceae	Aestuariivita	1	Aestuariivita	genus	Ok
Bacteria		Pseudomonadota	Alphaproteobacteria	Rhodobacterales	Paracoccaceae	Aestuarium	1	Aestuarium	genus	Ok
Bacteria		Pseudomonadota	Alphaproteobacteria	Hyphomicrobiales	Afifellaceae	Afifella	1	Afifella	genus	Ok
Bacteria		Pseudomonadota	Alphaproteobacteria	Hyphomicrobiales	Nitrobacteraceae	Afipia	1	Afipia	genus	Ok
Bacteria		Pseudomonadota	Alphaproteobacteria	Rhodobacterales	Paracoccaceae	Agaricicola	1	Agaricicola	genus	Ok
Bacteria		Bacillota	Clostridia	Eubacteriales	Oscillospiraceae	Agathobaculum	1	Agathobaculum	genus	Ok
Bacteria		Pseudomonadota	Gammaproteobacteria	Pasteurellales	Pasteurellaceae	Aggregatibacter	1	Aggregatibacter	genus	Ok
Bacteria		Chloroflexota	Anaerolineae	Aggregatilineales	Aggregatilineaceae	Aggregatilinea	1	Aggregatilinea	genus	Ok
Bacteria		Pseudomonadota	Alphaproteobacteria	Hyphomicrobiales	Rhizobiaceae	Agrobacterium	1	Agrobacterium	genus	Ok
Bacteria		Actinomycetota	Actinomycetes	Micrococcales	Microbacteriaceae	Agrococcus	1	Agrococcus	genus	Ok
Bacteria		Actinomycetota	Actinomycetes	Micrococcales	Microbacteriaceae	Agromyces	1	Agromyces	genus	Ok
Bacteria		Pseudomonadota	Alphaproteobacteria	Hyphomicrobiales	Ahrensiaceae	Ahrensia	1	Ahrensia	genus	Ok
Bacteria		Verrucomicrobiota	Verrucomicrobiae	Verrucomicrobiales	Akkermansiaceae	Akkermansia	1	Akkermansia	genus	Ok
Bacteria		Pseudomonadota	Alphaproteobacteria	Rhodobacterales	Paracoccaceae	Albibacillus	1	Albibacillus	genus	Ok
Bacteria		Pseudomonadota	Alphaproteobacteria	Rhodobacterales	Paracoccaceae	Albidovulum	1	Albidovulum	genus	Ok
Bacteria		Pseudomonadota	Alphaproteobacteria	Rhodobacterales	Paracoccaceae	Albimonas	1	Albimonas	genus	Ok
Bacteria		Pseudomonadota	Betaproteobacteria	Burkholderiales	Alcaligenaceae	Alcaligenes	1	Alcaligenes	genus	Ok
Bacteria		Pseudomonadota	Gammaproteobacteria	Oceanospirillales	Alcanivoracaceae	Alcanivorax	1	Alcanivorax	genus	Ok
Bacteria		Bacteroidota	Flavobacteriia	Flavobacteriales	Flavobacteriaceae	Algibacter	1	Algibacter	genus	Ok
Bacteria		Pseudomonadota	Gammaproteobacteria	Nevskiales	Algiphilaceae	Algiphilus	1	Algiphilus	genus	Ok
Bacteria		Planctomycetota	Phycisphaerae	Phycisphaerales	Phycisphaeraceae	Algisphaera	1	Algisphaera	genus	Ok
Bacteria		Bacteroidota	Cytophagia	Cytophagales	Cyclobacteriaceae	Algoriphagus	1	Algoriphagus	genus	Ok
Bacteria		Campylobacterota	Epsilonproteobacteria	Campylobacterales	Arcobacteraceae	Aliarcobacter	1	Aliarcobacter	genus	Ok
Bacteria		Pseudomonadota	Betaproteobacteria	Burkholderiales	Comamonadaceae	Alicycliphilus	1	Alicycliphilus	genus	Ok
Bacteria		Bacillota	Bacilli	Bacillales	Alicyclobacillaceae	Alicyclobacillus	1	Alicyclobacillus	genus	Ok
Bacteria		Pseudomonadota	Gammaproteobacteria	Alteromonadales	Idiomarinaceae	Aliidiomarina	1	Aliidiomarina	genus	Ok
Bacteria		Balneolota	Balneolia	Balneolales	Balneolaceae	Aliifodinibius	1	Aliifodinibius	genus	Ok
Bacteria		Pseudomonadota	Alphaproteobacteria	Hyphomicrobiales	Phyllobacteriaceae	Aliihoeflea	1	Aliihoeflea	genus	Ok
Bacteria		Pseudomonadota	Alphaproteobacteria	Rhodobacterales	Paracoccaceae	Aliiroseovarius	1	Aliiroseovarius	genus	Ok
Bacteria		Pseudomonadota	Alphaproteobacteria	Rhodobacterales	Roseobacteraceae	Aliiruegeria	1	Aliiruegeria	genus	Ok
Bacteria		Pseudomonadota	Gammaproteobacteria	Vibrionales	Vibrionaceae	Aliivibrio	1	Aliivibrio	genus	Ok
Bacteria		Bacteroidota	Bacteroidia	Bacteroidales	Rikenellaceae	Alistipes	1	Alistipes	genus	Ok
Bacteria		Cyanobacteriota	Cyanophyceae	Chroococcidiopsidales	Aliterellaceae	Aliterella	1	Aliterella	genus	Ok
Bacteria		Bacillota	Clostridia	Eubacteriales	Eubacteriaceae	Alkalibacter	1	Alkalibacter	genus	Ok
Bacteria		Bacillota	Bacilli	Lactobacillales	Carnobacteriaceae	Alkalibacterium	1	Alkalibacterium	genus	Ok
Bacteria		Bacillota	Clostridia	Eubacteriales	Eubacteriaceae	Alkalibaculum	1	Alkalibaculum	genus	Ok
Bacteria		Bacteroidota	Bacteroidia	Marinilabiliales	Marinilabiliaceae	Alkaliflexus	1	Alkaliflexus	genus	Ok
Bacteria		Bacillota	Bacilli	Bacillales	Bacillaceae	Alkalihalobacillus	1	Alkalihalobacillus	genus	Ok
Bacteria		Bacillota	Bacilli	Bacillales	Bacillaceae	Alkalihalophilus	1	Alkalihalophilus	genus	Ok
Bacteria		Pseudomonadota	Alphaproteobacteria	Rhodobacterales	Paracoccaceae	Alkalilacustris	1	Alkalilacustris	genus	Ok
Bacteria		Pseudomonadota	Gammaproteobacteria	Chromatiales	Ectothiorhodospiraceae	Alkalilimnicola	1	Alkalilimnicola	genus	Ok
Bacteria		Bacillota	Clostridia	Eubacteriales	Clostridiaceae	Alkaliphilus	1	Alkaliphilus	genus	Ok
Bacteria		Spirochaetota	Spirochaetia	Spirochaetales	Spirochaetaceae	Alkalispirochaeta	1	Alkalispirochaeta	genus	Ok
Bacteria		Pseudomonadota	Gammaproteobacteria	Moraxellales	Moraxellaceae	Alkanindiges	1	Alkanindiges	genus	Ok
Bacteria		Pseudomonadota	Alphaproteobacteria	Rhodobacterales	Paracoccaceae	Allgaiera	1	Allgaiera	genus	Ok
Bacteria		Pseudomonadota	Gammaproteobacteria	Chromatiales	Chromatiaceae	Allochromatium	1	Allochromatium	genus	Ok
Bacteria		Bacillota	Bacilli	Lactobacillales	Carnobacteriaceae	Allofustis	1	Allofustis	genus	Ok
Bacteria		Bacteroidota	Bacteroidia	Bacteroidales	Prevotellaceae	Alloprevotella	1	Alloprevotella	genus	Ok
Bacteria		Actinomycetota	Actinomycetes	Micromonosporales	Micromonosporaceae	Allorhizocola	1	Allorhizocola	genus	Ok
Bacteria		Pseudomonadota	Alphaproteobacteria	Rhodobacterales	Paracoccaceae	Allosediminivita	1	Allosediminivita	genus	Ok
Bacteria		Pseudomonadota	Alphaproteobacteria	Hyphomicrobiales	Alsobacteraceae	Alsobacter	1	Alsobacter	genus	Ok
Bacteria		Pseudomonadota	Alphaproteobacteria	Sphingomonadales	Erythrobacteraceae	Altererythrobacter	1	Altererythrobacter	genus	Ok
Bacteria		Bacillota	Bacilli	Bacillales	Bacillaceae	Alteribacter	1	Alteribacter	genus	Ok
Bacteria		Pseudomonadota	Alphaproteobacteria	Sphingomonadales	Erythrobacteraceae	Altericroceibacterium	1	Altericroceibacterium	genus	Ok
Bacteria		Pseudomonadota	Alphaproteobacteria	Rhodobacterales	Paracoccaceae	Alterinioella	1	Alterinioella	genus	Ok
Bacteria		Pseudomonadota	Gammaproteobacteria	Alteromonadales	Alteromonadaceae	Alteromonas	1	Alteromonas	genus	Ok
Bacteria		Pseudomonadota	Alphaproteobacteria	Rhodobacterales	Paracoccaceae	Amaricoccus	1	Amaricoccus	genus	Ok
Bacteria		Synergistota	Synergistia	Synergistales	Aminiphilaceae	Aminiphilus	1	Aminiphilus	genus	Ok
Bacteria		Synergistota	Synergistia	Synergistales	Aminobacteriaceae	Aminivibrio	1	Aminivibrio	genus	Ok
Bacteria		Pseudomonadota	Alphaproteobacteria	Hyphomicrobiales	Phyllobacteriaceae	Aminobacter	1	Aminobacter	genus	Ok
Bacteria		Synergistota	Synergistia	Synergistales	Aminobacteriaceae	Aminobacterium	1	Aminobacterium	genus	Ok
Bacteria		Synergistota	Synergistia	Synergistales	Synergistaceae	Aminomonas	1	Aminomonas	genus	Ok
Bacteria		Bacillota	Clostridia	Thermoanaerobacterales	Thermoanaerobacteraceae	Ammonifex	1	Ammonifex	genus	Ok
Bacteria		Pseudomonadota	Gammaproteobacteria	Moraxellales	Moraxellaceae	Amnimonas	1	Amnimonas	genus	Ok
Bacteria		Pseudomonadota	Alphaproteobacteria	Hyphomicrobiales	Amorphaceae	Amorphus	1	Amorphus	genus	Ok
Bacteria		Pseudomonadota	Alphaproteobacteria	Parvularculales	Parvularculaceae	Amphiplicatus	1	Amphiplicatus	genus	Ok
Bacteria		Actinomycetota	Actinomycetes	Pseudonocardiales	Pseudonocardiaceae	Amycolatopsis	1	Amycolatopsis	genus	Ok
Bacteria		Pseudomonadota	Alphaproteobacteria	Rhodobacterales	Paracoccaceae	Amylibacter	1	Amylibacter	genus	Ok
Bacteria		Bacillota	Clostridia	Eubacteriales	Oscillospiraceae	Anaerobacterium	1	Anaerobacterium	genus	Ok
Bacteria		Bacillota	Clostridia	Eubacteriales	Proteinivoraceae	Anaerobranca	1	Anaerobranca	genus	Ok
Bacteria		Bacillota	Clostridia	Eubacteriales	Lachnospiraceae	Anaerobutyricum	1	Anaerobutyricum	genus	Ok
Bacteria		Bacillota	Tissierellia	Tissierellales	Peptoniphilaceae	Anaerococcus	1	Anaerococcus	genus	Ok
Bacteria		Bacillota	Clostridia	Eubacteriales	Oscillospiraceae	Anaerofilum	1	Anaerofilum	genus	Ok
Bacteria		Planctomycetota	Phycisphaerae	Sedimentisphaerales	Anaerohalosphaeraceae	Anaerohalosphaera	1	Anaerohalosphaera	genus	Ok
Bacteria		Chloroflexota	Anaerolineae	Anaerolineales	Anaerolineaceae	Anaerolinea	1	Anaerolinea	genus	Ok
Bacteria		Myxococcota	Myxococcia	Myxococcales	Anaeromyxobacteraceae	Anaeromyxobacter	1	Anaeromyxobacter	genus	Ok
Bacteria		Bacteroidota	Bacteroidia	Marinilabiliales	Marinilabiliaceae	Anaerophaga	1	Anaerophaga	genus	Ok
Bacteria		Bacillota	Tissierellia	Tissierellales	Sporanaerobacteraceae	Anaerosalibacter	1	Anaerosalibacter	genus	Ok
Bacteria		Bacillota	Clostridia	Eubacteriales	Clostridiaceae	Anaerosolibacter	1	Anaerosolibacter	genus	Ok
Bacteria		Bacillota	Negativicutes	Selenomonadales	Sporomusaceae	Anaerospora	1	Anaerospora	genus	Ok
Bacteria		Bacillota	Negativicutes	Selenomonadales	Sporomusaceae	Anaerosporomusa	1	Anaerosporomusa	genus	Ok
Bacteria		Bacillota	Clostridia	Eubacteriales		Anaerotalea	1	Anaerotalea	genus	Ok
Bacteria		Bacillota	Clostridia	Eubacteriales	Lachnospiraceae	Anaerotignum	1	Anaerotignum	genus	Ok
Bacteria		Bacillota	Clostridia	Eubacteriales	Oscillospiraceae	Anaerotruncus	1	Anaerotruncus	genus	Ok
Bacteria		Bacillota	Clostridia	Eubacteriales	Eubacteriales Family XIII. Incertae Sedis	Anaerovorax	1	Anaerovorax	genus	Ok
Bacteria		Planctomycetota	Planctomycetia	Pirellulales	Pirellulaceae	Anatilimnocola	1	Anatilimnocola	genus	Ok
Bacteria		Actinomycetota	Actinomycetes	Actinomycetales	Actinomycetaceae	Ancrocorticia	1	Ancrocorticia	genus	Ok
Bacteria		Pseudomonadota	Alphaproteobacteria	Hyphomicrobiales	Xanthobacteraceae	Ancylobacter	1	Ancylobacter	genus	Ok
Bacteria		Pseudomonadota	Alphaproteobacteria	Hyphomicrobiales	Parvibaculaceae	Anderseniella	1	Anderseniella	genus	Ok
Bacteria		Bacillota	Tissierellia	Tissierellales	Gottschalkiaceae	Andreesenia	1	Andreesenia	genus	Ok
Bacteria		Bacillota	Bacilli	Bacillales	Paenibacillaceae	Aneurinibacillus	1	Aneurinibacillus	genus	Ok
Bacteria		Pseudomonadota	Alphaproteobacteria	Hyphomicrobiales	Hyphomicrobiaceae	Angulomicrobium	1	Angulomicrobium	genus	Ok
Bacteria		Bacillota	Bacilli	Bacillales	Bacillaceae	Anoxybacillus	1	Anoxybacillus	genus	Ok
Bacteria		Bacillota	Clostridia	Halanaerobiales		Anoxybacter	1	Anoxybacter	genus	Ok
Bacteria		Pseudomonadota	Alphaproteobacteria	Rhodobacterales	Paracoccaceae	Antarcticimicrobium	1	Antarcticimicrobium	genus	Ok
Bacteria		Pseudomonadota	Alphaproteobacteria	Rhodobacterales	Roseobacteraceae	Antarctobacter	1	Antarctobacter	genus	Ok
Bacteria		Pseudomonadota	Alphaproteobacteria	Hyphomicrobiales	Xanthobacteraceae	Aquabacter	1	Aquabacter	genus	Ok
Bacteria		Pseudomonadota	Betaproteobacteria	Burkholderiales		Aquabacterium	1	Aquabacterium	genus	Ok
Bacteria		Pseudomonadota	Alphaproteobacteria	Hyphomicrobiales	Phyllobacteriaceae	Aquamicrobium	1	Aquamicrobium	genus	Ok
Bacteria		Pseudomonadota	Alphaproteobacteria	Hyphomicrobiales	Phyllobacteriaceae	Aquibium	1	Aquibium	genus	Ok
Bacteria		Pseudomonadota	Gammaproteobacteria	Legionellales	Coxiellaceae	Aquicella	1	Aquicella	genus	Ok
Bacteria		Pseudomonadota	Alphaproteobacteria	Rhodobacterales	Paracoccaceae	Aquicoccus	1	Aquicoccus	genus	Ok
Bacteria		Actinomycetota	Actinomycetes	Micrococcales	Microbacteriaceae	Aquiluna	1	Aquiluna	genus	Ok
Bacteria		Bacteroidota	Flavobacteriia	Flavobacteriales	Flavobacteriaceae	Aquimarina	1	Aquimarina	genus	Ok
Bacteria		Pseudomonadota	Betaproteobacteria	Burkholderiales	Sphaerotilaceae	Aquincola	1	Aquincola	genus	Ok
Bacteria		Pseudomonadota	Gammaproteobacteria	Moraxellales	Moraxellaceae	Aquirhabdus	1	Aquirhabdus	genus	Ok
Bacteria		Bacteroidota	Cytophagia	Cytophagales	Cytophagaceae	Aquirufa	1	Aquirufa	genus	Ok
Bacteria		Pseudomonadota	Gammaproteobacteria	Chromatiales	Ectothiorhodospiraceae	Aquisalimonas	1	Aquisalimonas	genus	Ok
Bacteria		Pseudomonadota	Alphaproteobacteria	Parvularculales	Parvularculaceae	Aquisalinus	1	Aquisalinus	genus	Ok
Bacteria		Pseudomonadota	Alphaproteobacteria	Sphingomonadales	Sphingomonadaceae	Aquisediminimonas	1	Aquisediminimonas	genus	Ok
Bacteria		Planctomycetota	Planctomycetia	Isosphaerales	Isosphaeraceae	Aquisphaera	1	Aquisphaera	genus	Ok
Bacteria		Pseudomonadota	Betaproteobacteria	Neisseriales	Chromobacteriaceae	Aquitalea	1	Aquitalea	genus	Ok
Bacteria		Actinomycetota	Actinomycetes	Propionibacteriales	Propionibacteriaceae	Arachnia	1	Arachnia	genus	Ok
Bacteria		Actinomycetota	Actinomycetes	Actinomycetales	Actinomycetaceae	Arcanobacterium	1	Arcanobacterium	genus	Ok
Archaea		Euryarchaeota	Archaeoglobi	Archaeoglobales	Archaeoglobaceae	Archaeoglobus	1	Archaeoglobus	genus	Ok
Bacteria		Myxococcota	Myxococcia	Myxococcales	Archangiaceae	Archangium	1	Archangium	genus	Ok
Bacteria		Campylobacterota	Epsilonproteobacteria	Campylobacterales	Arcobacteraceae	Arcobacter	1	Arcobacter	genus	Ok
Bacteria		Chloroflexota	Ardenticatenia	Ardenticatenales	Ardenticatenaceae	Ardenticatena	1	Ardenticatena	genus	Ok
Bacteria		Bacteroidota	Flavobacteriia	Flavobacteriales	Flavobacteriaceae	Arenibacter	1	Arenibacter	genus	Ok
Bacteria		Pseudomonadota	Alphaproteobacteria	Rhodobacterales	Paracoccaceae	Arenibacterium	1	Arenibacterium	genus	Ok
Bacteria		Pseudomonadota	Alphaproteobacteria	Rhodospirillales	Azospirillaceae	Arenibaculum	1	Arenibaculum	genus	Ok
Bacteria		Pseudomonadota	Gammaproteobacteria	Arenicellales	Arenicellaceae	Arenicella	1	Arenicella	genus	Ok
Bacteria		Pseudomonadota	Gammaproteobacteria	Xanthomonadales	Xanthomonadaceae	Arenimonas	1	Arenimonas	genus	Ok
Bacteria		Pseudomonadota	Gammaproteobacteria	Chromatiales	Ectothiorhodospiraceae	Arhodomonas	1	Arhodomonas	genus	Ok
Bacteria		Pseudomonadota	Betaproteobacteria	Rhodocyclales	Rhodocyclaceae	Aromatoleum	1	Aromatoleum	genus	Ok
Bacteria		Bacteroidota	Cytophagia	Cytophagales	Spirosomaceae	Arsenicibacter	1	Arsenicibacter	genus	Ok
Bacteria		Actinomycetota	Actinomycetes	Micrococcales	Intrasporangiaceae	Arsenicicoccus	1	Arsenicicoccus	genus	Ok
Bacteria		Actinomycetota	Actinomycetes	Micrococcales	Micrococcaceae	Arthrobacter	1	Arthrobacter	genus	Ok
Bacteria		Pseudomonadota	Alphaproteobacteria	Rhodospirillales	Acetobacteraceae	Asaia	1	Asaia	genus	Ok
Bacteria		Bacteroidota	Chitinophagia	Chitinophagales	Chitinophagaceae	Asinibacterium	1	Asinibacterium	genus	Ok
Bacteria		Pseudomonadota	Alphaproteobacteria	Caulobacterales	Caulobacteraceae	Asticcacaulis	1	Asticcacaulis	genus	Ok
Bacteria		Thermotogota	Thermotogae	Mesoaciditogales	Mesoaciditogaceae	Athalassotoga	1	Athalassotoga	genus	Ok
Bacteria		Pseudomonadota	Gammaproteobacteria	Enterobacterales	Enterobacteriaceae	Atlantibacter	1	Atlantibacter	genus	Ok
Bacteria		Actinomycetota	Coriobacteriia	Coriobacteriales	Atopobiaceae	Atopobium	1	Atopobium	genus	Ok
Bacteria		Atribacterota	Atribacteria	Atribacterales	Atribacteraceae	Atribacter	1	Atribacter	genus	Ok
Bacteria		Pseudomonadota	Alphaproteobacteria	Sphingomonadales	Erythrobacteraceae	Aurantiacibacter	1	Aurantiacibacter	genus	Ok
Bacteria		Actinomycetota	Actinomycetes	Micrococcales	Microbacteriaceae	Aurantimicrobium	1	Aurantimicrobium	genus	Ok
Bacteria		Pseudomonadota	Alphaproteobacteria	Hyphomicrobiales	Aurantimonadaceae	Aurantimonas	1	Aurantimonas	genus	Ok
Bacteria		Bacteroidota	Flavobacteriia	Flavobacteriales	Flavobacteriaceae	Aureibaculum	1	Aureibaculum	genus	Ok
Bacteria		Pseudomonadota	Alphaproteobacteria	Hyphomicrobiales	Aurantimonadaceae	Aureimonas	1	Aureimonas	genus	Ok
Bacteria		Pseudomonadota	Betaproteobacteria	Rhodocyclales	Zoogloeaceae	Azoarcus	1	Azoarcus	genus	Ok
Bacteria		Pseudomonadota	Betaproteobacteria	Burkholderiales	Sphaerotilaceae	Azohydromonas	1	Azohydromonas	genus	Ok
Bacteria		Pseudomonadota	Alphaproteobacteria	Hyphomicrobiales	Xanthobacteraceae	Azorhizobium	1	Azorhizobium	genus	Ok
Bacteria		Pseudomonadota	Betaproteobacteria	Rhodocyclales	Rhodocyclaceae	Azospira	1	Azospira	genus	Ok
Bacteria		Pseudomonadota	Alphaproteobacteria	Rhodospirillales	Azospirillaceae	Azospirillum	1	Azospirillum	genus	Ok
Bacteria		Pseudomonadota	Gammaproteobacteria	Pseudomonadales	Pseudomonadaceae	Azotobacter	1	Azotobacter	genus	Ok
Bacteria		Pseudomonadota	Betaproteobacteria	Rhodocyclales	Rhodocyclaceae	Azovibrio	1	Azovibrio	genus	Ok
Bacteria		Bacillota	Clostridia	Eubacteriales	Eubacteriales Family XIII. Incertae Sedis	Bacilliculturomica	1	Bacilliculturomica	genus	Ok
Bacteria						Bacillus	1	Bacillus	genus	Ok
Bacteria		Pseudomonadota	Gammaproteobacteria	Oceanospirillales	Oceanospirillaceae	Bacterioplanes	1	Bacterioplanes	genus	Ok
Bacteria		Bdellovibrionota	Bacteriovoracia	Bacteriovoracales	Bacteriovoracaceae	Bacteriovorax	1	Bacteriovorax	genus	Ok
Bacteria		Bacteroidota	Bacteroidia	Bacteroidales	Bacteroidaceae	Bacteroides	1	Bacteroides	genus	Ok
Bacteria		Actinomycetota	Rubrobacteria	Rubrobacterales	Baekduiaceae	Baekduia	1	Baekduia	genus	Ok
Bacteria		Balneolota	Balneolia	Balneolales	Balneolaceae	Balneola	1	Balneola	genus	Ok
Bacteria		Bacteroidota	Bacteroidia	Bacteroidales	Barnesiellaceae	Barnesiella	1	Barnesiella	genus	Ok
Bacteria		Actinomycetota	Actinomycetes	Micrococcales	Dermacoccaceae	Barrientosiimonas	1	Barrientosiimonas	genus	Ok
Bacteria		Pseudomonadota	Alphaproteobacteria	Hyphomicrobiales	Bartonellaceae	Bartonella	1	Bartonella	genus	Ok
Bacteria		Pseudomonadota	Alphaproteobacteria	Hyphomicrobiales	Kaistiaceae	Bauldia	1	Bauldia	genus	Ok
Bacteria		Bdellovibrionota	Bdellovibrionia	Bdellovibrionales	Pseudobdellovibrionaceae	Bdellovibrio	1	Bdellovibrio	genus	Ok
Bacteria		Bacillota	Clostridia	Eubacteriales	Clostridiaceae	Beduini	1	Beduini	genus	Ok
Bacteria		Pseudomonadota	Gammaproteobacteria	Thiotrichales	Thiotrichaceae	Beggiatoa	1	Beggiatoa	genus	Ok
Bacteria		Pseudomonadota	Alphaproteobacteria	Hyphomicrobiales	Beijerinckiaceae	Beijerinckia	1	Beijerinckia	genus	Ok
Bacteria		Chloroflexota	Anaerolineae	Anaerolineales	Anaerolineaceae	Bellilinea	1	Bellilinea	genus	Ok
Bacteria		Pseudomonadota	Alphaproteobacteria	Rhodospirillales	Acetobacteraceae	Belnapia	1	Belnapia	genus	Ok
Bacteria		Bacteroidota	Flavobacteriia	Flavobacteriales	Weeksellaceae	Bergeyella	1	Bergeyella	genus	Ok
Bacteria		Actinomycetota	Actinomycetes	Micrococcales	Beutenbergiaceae	Beutenbergia	1	Beutenbergia	genus	Ok
Bacteria		Actinomycetota	Actinomycetes	Bifidobacteriales	Bifidobacteriaceae	Bifidobacterium	1	Bifidobacterium	genus	Ok
Bacteria		Thermodesulfobacteriota	Desulfovibrionia	Desulfovibrionales	Desulfovibrionaceae	Bilophila	1	Bilophila	genus	Ok
Bacteria		Bacillota	Clostridia	Thermosediminibacterales	Tepidanaerobacteraceae	Biomaibacter	1	Biomaibacter	genus	Ok
Bacteria		Pseudomonadota	Alphaproteobacteria	Hyphomicrobiales	Blastochloridaceae	Blastochloris	1	Blastochloris	genus	Ok
Bacteria		Actinomycetota	Actinomycetes	Geodermatophilales	Geodermatophilaceae	Blastococcus	1	Blastococcus	genus	Ok
Bacteria		Pseudomonadota	Alphaproteobacteria	Sphingomonadales	Sphingomonadaceae	Blastomonas	1	Blastomonas	genus	Ok
Bacteria		Planctomycetota	Planctomycetia	Pirellulales	Pirellulaceae	Blastopirellula	1	Blastopirellula	genus	Ok
Bacteria		Bacillota	Clostridia	Eubacteriales	Lachnospiraceae	Blautia	1	Blautia	genus	Ok
Bacteria		Pseudomonadota	Betaproteobacteria	Burkholderiales	Alcaligenaceae	Bordetella	1	Bordetella	genus	Ok
Bacteria		Spirochaetota	Spirochaetia	Spirochaetales	Borreliaceae	Borreliella	1	Borreliella	genus	Ok
Bacteria						Bosea	1	Bosea	genus	Ok
Bacteria		Pseudomonadota	Alphaproteobacteria	Rhodobacterales	Paracoccaceae	Boseongicola	1	Boseongicola	genus	Ok
Bacteria		Actinomycetota	Actinomycetes	Micrococcales	Dermabacteraceae	Brachybacterium	1	Brachybacterium	genus	Ok
Bacteria		Pseudomonadota	Betaproteobacteria	Burkholderiales	Comamonadaceae	Brachymonas	1	Brachymonas	genus	Ok
Bacteria		Spirochaetota	Spirochaetia	Brachyspirales	Brachyspiraceae	Brachyspira	1	Brachyspira	genus	Ok
Bacteria			Deltaproteobacteria	Bradymonadales	Bradymonadaceae	Bradymonas	1	Bradymonas	genus	Ok
Bacteria		Pseudomonadota	Alphaproteobacteria	Hyphomicrobiales	Nitrobacteraceae	Bradyrhizobium	1	Bradyrhizobium	genus	Ok
Bacteria		Actinomycetota	Actinomycetes	Micrococcales	Dermacoccaceae	Branchiibius	1	Branchiibius	genus	Ok
Bacteria		Planctomycetota	Planctomycetia	Pirellulales	Pirellulaceae	Bremerella	1	Bremerella	genus	Ok
Bacteria		Pseudomonadota	Alphaproteobacteria	Hyphomicrobiales	Breoghaniaceae	Breoghania	1	Breoghania	genus	Ok
Bacteria		Chloroflexota	Anaerolineae	Anaerolineales	Anaerolineaceae	Brevefilum	1	Brevefilum	genus	Ok
Bacteria		Bacillota	Bacilli	Bacillales	Paenibacillaceae	Brevibacillus	1	Brevibacillus	genus	Ok
Bacteria		Actinomycetota	Actinomycetes	Micrococcales	Brevibacteriaceae	Brevibacterium	1	Brevibacterium	genus	Ok
Bacteria						Brevilactibacter	1	Brevilactibacter	genus	Ok
Bacteria		Pseudomonadota	Alphaproteobacteria	Rhodobacterales	Paracoccaceae	Brevirhabdus	1	Brevirhabdus	genus	Ok
Bacteria		Pseudomonadota	Alphaproteobacteria	Caulobacterales	Caulobacteraceae	Brevundimonas	1	Brevundimonas	genus	Ok
Bacteria		Actinomycetota	Actinomycetes	Propionibacteriales	Propionibacteriaceae	Brooklawnia	1	Brooklawnia	genus	Ok
Bacteria		Pseudomonadota	Alphaproteobacteria	Hyphomicrobiales	Brucellaceae	Brucella	1	Brucella	genus	Ok
Bacteria		Pseudomonadota	Betaproteobacteria	Burkholderiales	Burkholderiaceae	Burkholderia	1	Burkholderia	genus	Ok
Bacteria		Bacillota	Clostridia	Eubacteriales	Clostridiaceae	Butyricicoccus	1	Butyricicoccus	genus	Ok
Bacteria		Bacteroidota	Bacteroidia	Bacteroidales	Odoribacteraceae	Butyricimonas	1	Butyricimonas	genus	Ok
Bacteria		Planctomycetota	Planctomycetia	Pirellulales	Lacipirellulaceae	Bythopirellula	1	Bythopirellula	genus	Ok
Bacteria		Pseudomonadota	Betaproteobacteria	Burkholderiales	Burkholderiaceae	Caballeronia	1	Caballeronia	genus	Ok
Bacteria		Bacillota	Bacilli	Bacillales	Sporolactobacillaceae	Caenibacillus	1	Caenibacillus	genus	Ok
Bacteria		Pseudomonadota	Alphaproteobacteria	Rhodospirillales	Rhodospirillaceae	Caenispirillum	1	Caenispirillum	genus	Ok
Bacteria		Bacillota	Bacilli	Bacillales	Bacillaceae	Caldalkalibacillus	1	Caldalkalibacillus	genus	Ok
Bacteria		Bacillota	Clostridia	Thermoanaerobacterales	Thermoanaerobacteraceae	Caldanaerobacter	1	Caldanaerobacter	genus	Ok
Bacteria		Bacillota	Clostridia	Thermoanaerobacterales	Thermoanaerobacteraceae	Caldanaerobius	1	Caldanaerobius	genus	Ok
Bacteria		Bacillota	Clostridia	Thermosediminibacterales	Thermosediminibacteraceae	Caldanaerovirga	1	Caldanaerovirga	genus	Ok
Bacteria		Bacillota	Clostridia	Moorellales	Calderihabitantaceae	Calderihabitans	1	Calderihabitans	genus	Ok
Bacteria		Bacillota	Bacilli	Bacillales	Bacillaceae	Caldibacillus	1	Caldibacillus	genus	Ok
Bacteria		Bacillota	Clostridia	Thermoanaerobacterales	Thermoanaerobacterales Family III. Incertae Sedis	Caldicellulosiruptor	1	Caldicellulosiruptor	genus	Ok
Bacteria		Bacillota	Clostridia	Eubacteriales	Caldicoprobacteraceae	Caldicoprobacter	1	Caldicoprobacter	genus	Ok
Bacteria		Chloroflexota	Caldilineae	Caldilineales	Caldilineaceae	Caldilinea	1	Caldilinea	genus	Ok
Bacteria		Thermodesulfobacteriota	Thermodesulfobacteria	Thermodesulfobacteriales	Thermodesulfobacteriaceae	Caldimicrobium	1	Caldimicrobium	genus	Ok
Bacteria		Pseudomonadota	Betaproteobacteria	Burkholderiales	Sphaerotilaceae	Caldimonas	1	Caldimonas	genus	Ok
Bacteria		Bacillota	Tissierellia	Tissierellales	Thermohalobacteraceae	Caldisalinibacter	1	Caldisalinibacter	genus	Ok
Bacteria		Caldisericota	Caldisericia	Caldisericales	Caldisericaceae	Caldisericum	1	Caldisericum	genus	Ok
Bacteria		Bacillota	Bacilli	Bacillales	Bacillaceae	Calditerricola	1	Calditerricola	genus	Ok
Bacteria		Deferribacterota	Deferribacteres	Deferribacterales	Calditerrivibrionaceae	Calditerrivibrio	1	Calditerrivibrio	genus	Ok
Bacteria		Calditrichota	Calditrichia	Calditrichales	Calditrichaceae	Caldithrix	1	Caldithrix	genus	Ok
Bacteria		Actinomycetota	Actinomycetes	Micrococcales	Dermacoccaceae	Calidifontibacter	1	Calidifontibacter	genus	Ok
Bacteria						Calidifontimicrobium	1	Calidifontimicrobium	genus	Ok
Bacteria		Deinococcota	Deinococci	Thermales	Thermaceae	Calidithermus	1	Calidithermus	genus	Ok
Bacteria		Bacillota	Clostridia	Eubacteriales	Clostridiaceae	Caloramator	1	Caloramator	genus	Ok
Bacteria		Bacillota	Tissierellia	Tissierellales	Thermohalobacteraceae	Caloranaerobacter	1	Caloranaerobacter	genus	Ok
Bacteria		Bacillota	Clostridia	Thermoanaerobacterales	Thermoanaerobacteraceae	Calorimonas	1	Calorimonas	genus	Ok
Bacteria		Cyanobacteriota	Cyanophyceae	Nostocales	Calotrichaceae	Calothrix	1	Calothrix	genus	Ok
Bacteria		Pseudomonadota	Alphaproteobacteria	Hyphomicrobiales	Chelatococcaceae	Camelimonas	1	Camelimonas	genus	Ok
Bacteria		Bacillota	Clostridia	Eubacteriales	Clostridiaceae	Caminicella	1	Caminicella	genus	Ok
Bacteria		Campylobacterota	Epsilonproteobacteria	Campylobacterales	Campylobacteraceae	Campylobacter	1	Campylobacter	genus	Ok
Bacteria		Pseudomonadota	Betaproteobacteria			Candidatus Accumulibacter	1	Candidatus Accumulibacter	genus	Ok
Bacteria		Candidatus Bipolaricaulota				Candidatus Acetothermum	1	Candidatus Acetothermum	genus	Ok
Bacteria						Candidatus Aegiribacteria	1	Candidatus Aegiribacteria	genus	Ok
Bacteria		Candidatus Aerophobetes				Candidatus Aerophobus	1	Candidatus Aerophobus	genus	Ok
Archaea						Candidatus Altiarchaeum	1	Candidatus Altiarchaeum	genus	Ok
Bacteria		Planctomycetota	Planctomycetia	Pirellulales	Pirellulaceae	Candidatus Anammoximicrobium	1	Candidatus Anammoximicrobium	genus	Ok
Bacteria		Actinomycetota	Candidatus Geothermincolia	Candidatus Geothermincolales	Candidatus Anoxymicrobiaceae	Candidatus Anoxymicrobium	1	Candidatus Anoxymicrobium	genus	Ok
Archaea		Euryarchaeota	Methanomicrobia	Methanosarcinales		Candidatus Argoarchaeum	1	Candidatus Argoarchaeum	genus	Ok
Bacteria		Elusimicrobiota	Elusimicrobia	Elusimicrobiales	Elusimicrobiaceae	Candidatus Avelusimicrobium	1	Candidatus Avelusimicrobium	genus	Ok
Bacteria		Bacillota	Clostridia	Eubacteriales	Oscillospiraceae	Candidatus Avoscillospira	1	Candidatus Avoscillospira	genus	Ok
Bacteria		Candidatus Bipolaricaulota				Candidatus Bipolaricaulis	1	Candidatus Bipolaricaulis	genus	Ok
Bacteria		Bacillota	Clostridia	Candidatus Borkfalkiales	Candidatus Borkfalkiaceae	Candidatus Borkfalkia	1	Candidatus Borkfalkia	genus	Ok
Bacteria		Planctomycetota	Candidatus Brocadiia	Candidatus Brocadiales	Candidatus Brocadiaceae	Candidatus Brocadia	1	Candidatus Brocadia	genus	Ok
Bacteria		Bacillota	Clostridia	Eubacteriales	Christensenellaceae	Candidatus Caccalectryoclostridium	1	Candidatus Caccalectryoclostridium	genus	Ok
Bacteria		Atribacterota				Candidatus Caldatribacterium	1	Candidatus Caldatribacterium	genus	Ok
Bacteria		Bacillota	Bacilli	Bacillales		Candidatus Carbobacillus	1	Candidatus Carbobacillus	genus	Ok
Bacteria					Candidatus Chazhemtobacteraceae	Candidatus Chazhemtobacterium	1	Candidatus Chazhemtobacterium	genus	Ok
Bacteria		Chloroflexota	Chloroflexia	Chloroflexales	Oscillochloridaceae	Candidatus Chloroploca	1	Candidatus Chloroploca	genus	Ok
Bacteria		Candidatus Cloacimonadota	Candidatus Cloacimonadia	Candidatus Cloacimonadales	Candidatus Cloacimonadaceae	Candidatus Cloacimonas	1	Candidatus Cloacimonas	genus	Ok
Bacteria		Pseudomonadota	Gammaproteobacteria		Candidatus Competibacteraceae	Candidatus Competibacter	1	Candidatus Competibacter	genus	Ok
Bacteria		Pseudomonadota	Gammaproteobacteria		Candidatus Competibacteraceae	Candidatus Contendobacter	1	Candidatus Contendobacter	genus	Ok
Bacteria		Bacillota	Clostridia	Eubacteriales	Syntrophomonadaceae	Candidatus Contubernalis	1	Candidatus Contubernalis	genus	Ok
Bacteria		Bacillota	Clostridia	Eubacteriales		Candidatus Copromonas	1	Candidatus Copromonas	genus	Ok
Bacteria		Bacillota	Clostridia	Eubacteriales	Eubacteriaceae	Candidatus Copromorpha	1	Candidatus Copromorpha	genus	Ok
Bacteria		Bacillota	Clostridia	Eubacteriales		Candidatus Coproplasma	1	Candidatus Coproplasma	genus	Ok
Bacteria		Candidatus Cryosericota	Candidatus Cryosericia	Candidatus Cryosericales	Candidatus Cryosericaceae	Candidatus Cryosericum	1	Candidatus Cryosericum	genus	Ok
Bacteria		Chloroflexota	Anaerolineae	Anaerolineales	Anaerolineaceae	Candidatus Denitrolinea	1	Candidatus Denitrolinea	genus	Ok
Bacteria		Thermodesulfobacteriota	Candidatus Desulfofervidia	Candidatus Desulfofervidales	Candidatus Desulfofervidaceae	Candidatus Desulfofervidus	1	Candidatus Desulfofervidus	genus	Ok
Bacteria		Bacillota	Clostridia	Eubacteriales	Peptococcaceae	Candidatus Desulforudis	1	Candidatus Desulforudis	genus	Ok
Bacteria		Verrucomicrobiota	Opitutae	Opitutales	Opitutaceae	Candidatus Didemnitutus	1	Candidatus Didemnitutus	genus	Ok
Bacteria		Bacillota	Clostridia	Eubacteriales	Oscillospiraceae	Candidatus Egerieicola	1	Candidatus Egerieicola	genus	Ok
Bacteria		Thermodesulfobacteriota	Desulfobulbia	Desulfobulbales	Desulfobulbaceae	Candidatus Electrothrix	1	Candidatus Electrothrix	genus	Ok
Bacteria		Bacillota	Clostridia	Eubacteriales		Candidatus Enterenecus	1	Candidatus Enterenecus	genus	Ok
Bacteria		Candidatus Tectomicrobia				Candidatus Entotheonella	1	Candidatus Entotheonella	genus	Ok
Bacteria		Bacillota	Clostridia	Eubacteriales	Oscillospiraceae	Candidatus Faeciplasma	1	Candidatus Faeciplasma	genus	Ok
Bacteria		Bacillota	Clostridia	Eubacteriales	Oscillospiraceae	Candidatus Faecivivens	1	Candidatus Faecivivens	genus	Ok
Bacteria		Bacillota	Clostridia	Eubacteriales		Candidatus Faecousia	1	Candidatus Faecousia	genus	Ok
Bacteria		Candidatus Fermentibacteria	Candidatus Fermentibacteria (class)	Candidatus Fermentibacterales	Candidatus Fermentibacteraceae	Candidatus Fermentibacter	1	Candidatus Fermentibacter	genus	Ok
Bacteria		Bacillota	Clostridia			Candidatus Fimenecus	1	Candidatus Fimenecus	genus	Ok
Bacteria		Myxococcota	Myxococcia	Myxococcales	Myxococcaceae	Candidatus Fimimonas	1	Candidatus Fimimonas	genus	Ok
Bacteria		Bacillota	Clostridia	Eubacteriales		Candidatus Fimimorpha	1	Candidatus Fimimorpha	genus	Ok
Bacteria		Bacillota	Clostridia	Eubacteriales	Lachnospiraceae	Candidatus Fimousia	1	Candidatus Fimousia	genus	Ok
Bacteria		Pseudomonadota	Alphaproteobacteria	Candidatus Pelagibacterales		Candidatus Fonsibacter	1	Candidatus Fonsibacter	genus	Ok
Bacteria		Bacillota	Clostridia	Eubacteriales	Peptococcaceae	Candidatus Formimonas	1	Candidatus Formimonas	genus	Ok
Bacteria		Bacillota	Clostridia	Halanaerobiales	Halobacteroidaceae	Candidatus Frackibacter	1	Candidatus Frackibacter	genus	Ok
Bacteria						Candidatus Galligastranaerophilus	1	Candidatus Galligastranaerophilus	genus	Ok
Bacteria		Bacillota	Clostridia			Candidatus Gallimonas	1	Candidatus Gallimonas	genus	Ok
Archaea		Candidatus Hadarchaeota	Candidatus Hadarchaeia	Candidatus Hadarchaeales	Candidatus Hadarchaeaceae	Candidatus Hadarchaeum	1	Candidatus Hadarchaeum	genus	Ok
Bacteria		Actinomycetota				Candidatus Hakubanella	1	Candidatus Hakubanella	genus	Ok
Bacteria		Pseudomonadota	Gammaproteobacteria	Enterobacterales	Enterobacteriaceae	Candidatus Hamiltonella	1	Candidatus Hamiltonella	genus	Ok
Archaea		Candidatus Huberarchaea				Candidatus Huberarchaeum	1	Candidatus Huberarchaeum	genus	Ok
Bacteria		Candidatus Hydrogenedentes				Candidatus Hydrogenedens	1	Candidatus Hydrogenedens	genus	Ok
Bacteria		Actinomycetota	Candidatus Humimicrobiia	Candidatus Humimicrobiales	Candidatus Hydromicrobiaceae	Candidatus Hydromicrobium	1	Candidatus Hydromicrobium	genus	Ok
Bacteria						Candidatus Izimaplasma	1	Candidatus Izimaplasma	class	Ok
Bacteria		Pseudomonadota	Gammaproteobacteria			Candidatus Kentron	1	Candidatus Kentron	genus	Ok
Bacteria		Candidatus Kryptonia				Candidatus Kryptobacter	1	Candidatus Kryptobacter	genus	Ok
Bacteria		Candidatus Kryptonia				Candidatus Kryptonium	1	Candidatus Kryptonium	genus	Ok
Bacteria		Planctomycetota	Candidatus Brocadiia	Candidatus Brocadiales	Candidatus Brocadiaceae	Candidatus Kuenenia	1	Candidatus Kuenenia	genus	Ok
Bacteria		Bacillota	Clostridia	Eubacteriales		Candidatus Limadaptatus	1	Candidatus Limadaptatus	genus	Ok
Bacteria		Bacillota	Clostridia	Eubacteriales		Candidatus Limiplasma	1	Candidatus Limiplasma	genus	Ok
Bacteria		Bacillota	Clostridia	Eubacteriales	Lachnospiraceae	Candidatus Limivivens	1	Candidatus Limivivens	genus	Ok
Bacteria		Pseudomonadota	Gammaproteobacteria	Chromatiales	Ectothiorhodospiraceae	Candidatus Macondimonas	1	Candidatus Macondimonas	genus	Ok
Bacteria		Nitrospirota	Nitrospiria	Nitrospirales	Nitrospiraceae	Candidatus Magnetobacterium	1	Candidatus Magnetobacterium	genus	Ok
Bacteria		Thermodesulfobacteriota	Desulfobacteria	Desulfobacterales	Candidatus Magnetomoraceae	Candidatus Magnetomorum	1	Candidatus Magnetomorum	genus	Ok
Bacteria		Nitrospirota	Nitrospiria	Nitrospirales	Nitrospiraceae	Candidatus Magnetoovum	1	Candidatus Magnetoovum	genus	Ok
Bacteria		Nitrospirota	Nitrospiria	Candidatus Troglogloeales	Candidatus Manganitrophaceae	Candidatus Manganitrophus	1	Candidatus Manganitrophus	genus	Ok
Bacteria		Campylobacterota	Epsilonproteobacteria	Campylobacterales	Arcobacteraceae	Candidatus Marinarcus	1	Candidatus Marinarcus	genus	Ok
Bacteria		Pseudomonadota	Gammaproteobacteria	Thiotrichales	Thiotrichaceae	Candidatus Marithrix	1	Candidatus Marithrix	genus	Ok
Bacteria		Candidatus Mcinerneyibacteriota	Candidatus Mcinerneyibacteria	Candidatus Mcinerneyibacteriales	Candidatus Mcinerneyibacteriaceae	Candidatus Mcinerneyibacterium	1	Candidatus Mcinerneyibacterium	genus	Ok
Bacteria		Bacillota	Clostridia	Eubacteriales	Lachnospiraceae	Candidatus Merdiplasma	1	Candidatus Merdiplasma	genus	Ok
Bacteria		Bacillota	Clostridia	Eubacteriales	Lachnospiraceae	Candidatus Merdisoma	1	Candidatus Merdisoma	genus	Ok
Bacteria		Bacillota	Clostridia	Eubacteriales	Oscillospiraceae	Candidatus Merdivicinus	1	Candidatus Merdivicinus	genus	Ok
Archaea		Candidatus Korarchaeota				Candidatus Methanodesulfokores	1	Candidatus Methanodesulfokores	genus	Ok
Archaea		Euryarchaeota	Candidatus Methanofastidiosa			Candidatus Methanofastidiosum	1	Candidatus Methanofastidiosum	genus	Ok
Bacteria		Pseudomonadota	Gammaproteobacteria			Candidatus Methanofishera	1	Candidatus Methanofishera	genus	Ok
Archaea		Euryarchaeota	Candidatus Methanoliparia	Candidatus Methanoliparales	Candidatus Methanoliparaceae	Candidatus Methanoliparum	1	Candidatus Methanoliparum	genus	Ok
Archaea		Euryarchaeota	Candidatus Methanoliparia	Candidatus Methanoliparales	Candidatus Methanollivieraceae	Candidatus Methanolliviera	1	Candidatus Methanolliviera	genus	Ok
Archaea		Euryarchaeota	Methanomicrobia	Methanosarcinales	Candidatus Methanoperedenaceae	Candidatus Methanoperedens	1	Candidatus Methanoperedens	genus	Ok
Archaea		Candidatus Verstraetearchaeota	Candidatus Methanomethylicia	Candidatus Methanomethylicales	Candidatus Methanomethylicaceae	Candidatus Methanosuratincola	1	Candidatus Methanosuratincola	genus	Ok
Bacteria		candidate division NC10				Candidatus Methylomirabilis	1	Candidatus Methylomirabilis	genus	Ok
Bacteria		Pseudomonadota	Gammaproteobacteria	Methylococcales		Candidatus Methylumidiphilus	1	Candidatus Methylumidiphilus	genus	Ok
Bacteria		Candidatus Saccharibacteria	Candidatus Saccharimonadia	Candidatus Saccharimonadales	Candidatus Saccharimonadaceae	Candidatus Microsaccharimonas	1	Candidatus Microsaccharimonas	genus	Ok
Bacteria		Actinomycetota	Acidimicrobiia	Acidimicrobiales	Microthrixaceae	Candidatus Microthrix	1	Candidatus Microthrix	genus	Ok
Bacteria						Candidatus Moduliflexus	1	Candidatus Moduliflexus	genus	Ok
Bacteria		Candidatus Muirbacteria				Candidatus Muirbacterium	1	Candidatus Muirbacterium	genus	Ok
Bacteria		Actinomycetota	Actinomycetes	Candidatus Nanopelagicales	Candidatus Nanopelagicaceae	Candidatus Nanopelagicus	1	Candidatus Nanopelagicus	genus	Ok
Archaea		Nanoarchaeota	Candidatus Nanoarchaeia	Nanoarchaeales	Nanopusillaceae	Candidatus Nanopusillus	1	Candidatus Nanopusillus	genus	Ok
Bacteria		Candidatus Saccharibacteria	Candidatus Saccharimonadia	Candidatus Nanosynbacterales	Candidatus Nanosynbacteraceae	Candidatus Nanosynbacter	1	Candidatus Nanosynbacter	genus	Ok
Bacteria		Pseudomonadota	Gammaproteobacteria	Chromatiales	Chromatiaceae	Candidatus Nitrosacidococcus	1	Candidatus Nitrosacidococcus	genus	Ok
Archaea		Nitrososphaerota	Nitrososphaeria	Nitrososphaerales	Nitrososphaeraceae	Candidatus Nitrosocosmicus	1	Candidatus Nitrosocosmicus	genus	Ok
Archaea		Nitrososphaerota				Candidatus Nitrosotalea	1	Candidatus Nitrosotalea	genus	Ok
Archaea		Nitrososphaerota				Candidatus Nitrosotenuis	1	Candidatus Nitrosotenuis	genus	Ok
Bacteria		Candidatus Melainabacteria		Candidatus Obscuribacterales		Candidatus Obscuribacter	1	Candidatus Obscuribacter	genus	Ok
Bacteria		Pseudomonadota	Alphaproteobacteria	Holosporales	Candidatus Paracaedibacteraceae	Candidatus Odyssella	1	Candidatus Odyssella	genus	Ok
Bacteria		Bacillota	Clostridia	Eubacteriales	Christensenellaceae	Candidatus Ornithoclostridium	1	Candidatus Ornithoclostridium	genus	Ok
Bacteria			Candidatus Ozemobacteria		Candidatus Ozemobacteraceae	Candidatus Ozemobacter	1	Candidatus Ozemobacter	genus	Ok
Bacteria		Candidatus Parcubacteria				Candidatus Paceibacter	1	Candidatus Paceibacter	genus	Ok
Bacteria		Pseudomonadota	Alphaproteobacteria	Candidatus Pelagibacterales	Pelagibacteraceae	Candidatus Pelagibacter	1	Candidatus Pelagibacter	genus	Ok
Bacteria		Mycoplasmatota	Mollicutes			Candidatus Pelethenecus	1	Candidatus Pelethenecus	genus	Ok
Bacteria		Bacillota	Clostridia	Eubacteriales	Oscillospiraceae	Candidatus Pelethomonas	1	Candidatus Pelethomonas	genus	Ok
Bacteria		Pseudomonadota	Alphaproteobacteria	Hyphomicrobiales	Parvibaculaceae	Candidatus Phaeomarinobacter	1	Candidatus Phaeomarinobacter	genus	Ok
Archaea		Candidatus Lokiarchaeota	Candidatus Lokiarchaeia	Candidatus Prometheoarchaeales	Candidatus Prometheoarchaeaceae	Candidatus Prometheoarchaeum	1	Candidatus Prometheoarchaeum	genus	Ok
Bacteria						Candidatus Promineofilum	1	Candidatus Promineofilum	genus	Ok
Bacteria		Chlamydiota	Chlamydiia	Parachlamydiales	Parachlamydiaceae	Candidatus Protochlamydia	1	Candidatus Protochlamydia	genus	Ok
Bacteria		Bacillota	Clostridia			Candidatus Protoclostridium	1	Candidatus Protoclostridium	genus	Ok
Bacteria		Bacillota	Clostridia			Candidatus Pullichristensenella	1	Candidatus Pullichristensenella	genus	Ok
Bacteria		Bacillota	Clostridia	Eubacteriales	Lachnospiraceae	Candidatus Pullilachnospira	1	Candidatus Pullilachnospira	genus	Ok
Bacteria		Bacillota	Bacilli	Bacillales	Paenibacillaceae	Candidatus Reconcilbacillus	1	Candidatus Reconcilbacillus	genus	Ok
Bacteria		Chlamydiota	Chlamydiia	Parachlamydiales	Rhabdochlamydiaceae	Candidatus Rhabdochlamydia	1	Candidatus Rhabdochlamydia	genus	Ok
Bacteria		Pseudomonadota	Gammaproteobacteria	Enterobacterales	Enterobacteriaceae	Candidatus Riesia	1	Candidatus Riesia	genus	Ok
Bacteria		Chloroflexota	Candidatus Thermofonsia			Candidatus Roseilinea	1	Candidatus Roseilinea	genus	Ok
Bacteria		Candidatus Fermentibacteria				Candidatus Sabulitectum	1	Candidatus Sabulitectum	genus	Ok
Bacteria		Candidatus Aminicenantes				Candidatus Saccharicenans	1	Candidatus Saccharicenans	genus	Ok
Bacteria		Candidatus Saccharibacteria	Candidatus Saccharimonadia	Candidatus Saccharimonadales	Candidatus Saccharimonadaceae	Candidatus Saccharimonas	1	Candidatus Saccharimonas	genus	Ok
Bacteria		Planctomycetota	Candidatus Brocadiia	Candidatus Brocadiales	Candidatus Scalinduaceae	Candidatus Scalindua	1	Candidatus Scalindua	genus	Ok
Bacteria						Candidatus Scatenecus	1	Candidatus Scatenecus	genus	Ok
Bacteria		Bacillota	Clostridia	Eubacteriales		Candidatus Scatomorpha	1	Candidatus Scatomorpha	genus	Ok
Bacteria		Actinomycetota	Candidatus Geothermincolia	Candidatus Geothermincolales	Candidatus Geothermincolaceae	Candidatus Solincola	1	Candidatus Solincola	genus	Ok
Bacteria						Candidatus Spyradomonas	1	Candidatus Spyradomonas	genus	Ok
Bacteria						Candidatus Stahlbacteria	1	Candidatus Stahlbacteria	genus	Ok
Bacteria		Bacillota	Erysipelotrichia	Erysipelotrichales	Erysipelotrichaceae	Candidatus Stoquefichus	1	Candidatus Stoquefichus	genus	Ok
Bacteria		Acidobacteriota	Terriglobia	Bryobacterales	Solibacteraceae	Candidatus Sulfopaludibacter	1	Candidatus Sulfopaludibacter	genus	Ok
Bacteria		Candidatus Sumerlaeota	Candidatus Sumerlaeia	Candidatus Sumerlaeales	Candidatus Sumerlaeaceae	Candidatus Sumerlaea	1	Candidatus Sumerlaea	genus	Ok
Archaea		Euryarchaeota	Methanomicrobia	Methanosarcinales		Candidatus Syntrophoarchaeum	1	Candidatus Syntrophoarchaeum	genus	Ok
Bacteria		Bacillota	Clostridia	Eubacteriales	Syntrophomonadaceae	Candidatus Syntrophocurvum	1	Candidatus Syntrophocurvum	genus	Ok
Bacteria		Candidatus Cloacimonadota	Candidatus Cloacimonadia	Candidatus Cloacimonadales	Candidatus Cloacimonadaceae	Candidatus Syntrophosphaera	1	Candidatus Syntrophosphaera	genus	Ok
Bacteria		Pseudomonadota	Gammaproteobacteria	Chromatiales	Chromatiaceae	Candidatus Tenderia	1	Candidatus Tenderia	genus	Ok
Bacteria		Candidatus Margulisbacteria	Candidatus Termititenacia	Candidatus Termititenacales	Candidatus Termititenacaceae	Candidatus Termititenax	1	Candidatus Termititenax	genus	Ok
Bacteria		Pseudomonadota	Gammaproteobacteria			Candidatus Thiodiazotropha	1	Candidatus Thiodiazotropha	genus	Ok
Bacteria		Pseudomonadota	Gammaproteobacteria	Chromatiales	Chromatiaceae	Candidatus Thiosymbion	1	Candidatus Thiosymbion	genus	Ok
Bacteria		Verrucomicrobiota	Spartobacteria	Chthoniobacterales	Chthoniobacteraceae	Candidatus Udaeobacter	1	Candidatus Udaeobacter	genus	Ok
Bacteria						Candidatus Vecturithrix	1	Candidatus Vecturithrix	genus	Ok
Bacteria		Pseudomonadota	Alphaproteobacteria	Hyphomonadales	Hyphomonadaceae	Candidatus Viadribacter	1	Candidatus Viadribacter	genus	Ok
Bacteria		Pseudomonadota	Gammaproteobacteria			Candidatus Vondammii	1	Candidatus Vondammii	genus	Ok
Bacteria		Pseudomonadota	Betaproteobacteria	Burkholderiales	Alcaligenaceae	Candidimonas	1	Candidimonas	genus	Ok
Bacteria		Bacillota				Capillibacterium	1	Capillibacterium	genus	Ok
Bacteria		Bacteroidota	Flavobacteriia	Flavobacteriales	Flavobacteriaceae	Capnocytophaga	1	Capnocytophaga	genus	Ok
Bacteria		Bacillota	Clostridia	Eubacteriales	Oscillospiraceae	Caproiciproducens	1	Caproiciproducens	genus	Ok
Bacteria		Bacillota	Clostridia	Eubacteriales	Clostridiales Family XVI. Incertae Sedis	Carboxydocella	1	Carboxydocella	genus	Ok
Bacteria		Bacillota	Clostridia	Thermoanaerobacterales	Thermoanaerobacteraceae	Carboxydothermus	1	Carboxydothermus	genus	Ok
Bacteria		Bacteroidota	Bacteroidia	Marinilabiliales	Marinilabiliaceae	Carboxylicivirga	1	Carboxylicivirga	genus	Ok
Bacteria		Pseudomonadota	Gammaproteobacteria	Cardiobacteriales	Cardiobacteriaceae	Cardiobacterium	1	Cardiobacterium	genus	Ok
Bacteria		Pseudomonadota	Alphaproteobacteria	Rhodobacterales	Paracoccaceae	Carideicomes	1	Carideicomes	genus	Ok
Bacteria		Bacillota	Bacilli	Lactobacillales	Carnobacteriaceae	Carnobacterium	1	Carnobacterium	genus	Ok
Bacteria		Bacillota	Clostridia	Eubacteriales	Eubacteriales Family XIII. Incertae Sedis	Casaltella	1	Casaltella	genus	Ok
Bacteria		Pseudomonadota	Betaproteobacteria	Burkholderiales	Alcaligenaceae	Castellaniella	1	Castellaniella	genus	Ok
Bacteria		Bacillota	Erysipelotrichia	Erysipelotrichales	Coprobacillaceae	Catenibacterium	1	Catenibacterium	genus	Ok
Bacteria		Pseudomonadota	Alphaproteobacteria	Caulobacterales	Caulobacteraceae	Caulobacter	1	Caulobacter	genus	Ok
Bacteria		Pseudomonadota	Gammaproteobacteria	Enterobacterales	Enterobacteriaceae	Cedecea	1	Cedecea	genus	Ok
Bacteria		Pseudomonadota	Alphaproteobacteria	Rhodobacterales	Roseobacteraceae	Celeribacter	1	Celeribacter	genus	Ok
Bacteria		Pseudomonadota	Gammaproteobacteria		Celerinatantimonadaceae	Celerinatantimonas	1	Celerinatantimonas	genus	Ok
Bacteria		Actinomycetota	Actinomycetes	Micrococcales	Cellulomonadaceae	Cellulomonas	1	Cellulomonas	genus	Ok
Bacteria		Actinomycetota	Actinomycetes	Micrococcales	Promicromonosporaceae	Cellulosimicrobium	1	Cellulosimicrobium	genus	Ok
Bacteria		Pseudomonadota	Gammaproteobacteria	Cellvibrionales	Cellvibrionaceae	Cellvibrio	1	Cellvibrio	genus	Ok
Bacteria		Verrucomicrobiota	Opitutae	Puniceicoccales	Cerasicoccaceae	Cerasicoccus	1	Cerasicoccus	genus	Ok
Bacteria		Pseudomonadota	Alphaproteobacteria	Rhodobacterales	Paracoccaceae	Cereibacter	1	Cereibacter	genus	Ok
Bacteria		Pseudomonadota	Alphaproteobacteria	Rhodobacterales	Paracoccaceae	Chachezhania	1	Chachezhania	genus	Ok
Bacteria		Actinomycetota	Actinomycetes	Actinomycetales	Actinomycetaceae	Changpingibacter	1	Changpingibacter	genus	Ok
Bacteria		Pseudomonadota	Alphaproteobacteria	Hyphomicrobiales	Phyllobacteriaceae	Chelativorans	1	Chelativorans	genus	Ok
Bacteria		Pseudomonadota	Alphaproteobacteria	Hyphomicrobiales	Chelatococcaceae	Chelatococcus	1	Chelatococcus	genus	Ok
Bacteria		Pseudomonadota	Alphaproteobacteria	Hyphomicrobiales	Methylocystaceae	Chenggangzhangella	1	Chenggangzhangella	genus	Ok
Bacteria		Pseudomonadota	Gammaproteobacteria	Xanthomonadales	Rhodanobacteraceae	Chiayiivirga	1	Chiayiivirga	genus	Ok
Bacteria		Pseudomonadota	Betaproteobacteria	Neisseriales	Neisseriaceae	Chitinolyticbacter	1	Chitinolyticbacter	genus	Ok
Bacteria		Bacteroidota	Chitinophagia	Chitinophagales	Chitinophagaceae	Chitinophaga	1	Chitinophaga	genus	Ok
Bacteria		Chlamydiota	Chlamydiia	Chlamydiales	Chlamydiaceae	Chlamydia	1	Chlamydia	genus	Ok
Bacteria		Acidobacteriota	Blastocatellia			Chloracidobacterium	1	Chloracidobacterium	genus	Ok
Bacteria		Chlorobiota	Chlorobiia	Chlorobiales	Chlorobiaceae	Chlorobaculum	1	Chlorobaculum	genus	Ok
Bacteria		Chlorobiota	Chlorobiia	Chlorobiales	Chlorobiaceae	Chlorobium	1	Chlorobium	genus	Ok
Bacteria		Chloroflexota	Chloroflexia	Chloroflexales	Chloroflexaceae	Chloroflexus	1	Chloroflexus	genus	Ok
Bacteria		Myxococcota		Polyangiales	Polyangiaceae	Chondromyces	1	Chondromyces	genus	Ok
Bacteria		Bacillota	Clostridia	Eubacteriales	Christensenellaceae	Christensenella	1	Christensenella	genus	Ok
Bacteria		Pseudomonadota	Gammaproteobacteria	Chromatiales	Chromatiaceae	Chromatium	1	Chromatium	genus	Ok
Bacteria		Pseudomonadota	Gammaproteobacteria	Cellvibrionales	Halieaceae	Chromatocurvus	1	Chromatocurvus	genus	Ok
Bacteria		Pseudomonadota	Betaproteobacteria	Neisseriales	Chromobacteriaceae	Chromobacterium	1	Chromobacterium	genus	Ok
Bacteria		Pseudomonadota	Gammaproteobacteria	Oceanospirillales	Halomonadaceae	Chromohalobacter	1	Chromohalobacter	genus	Ok
Bacteria		Cyanobacteriota	Cyanophyceae	Chroococcidiopsidales	Chroococcidiopsidaceae	Chroococcidiopsis	1	Chroococcidiopsis	genus	Ok
Bacteria		Bacteroidota	Flavobacteriia	Flavobacteriales	Weeksellaceae	Chryseobacterium	1	Chryseobacterium	genus	Ok
Bacteria						Chryseoglobus	1	Chryseoglobus	genus	Ok
Bacteria		Chrysiogenota	Chrysiogenetes	Chrysiogenales	Chrysiogenaceae	Chrysiogenes	1	Chrysiogenes	genus	Ok
Bacteria		Verrucomicrobiota	Spartobacteria	Chthoniobacterales	Chthoniobacteraceae	Chthoniobacter	1	Chthoniobacter	genus	Ok
Bacteria		Armatimonadota	Chthonomonadetes	Chthonomonadales	Chthonomonadaceae	Chthonomonas	1	Chthonomonas	genus	Ok
Bacteria		Pseudomonadota	Alphaproteobacteria	Hyphomicrobiales	Rhizobiaceae	Ciceribacter	1	Ciceribacter	genus	Ok
Bacteria		Pseudomonadota	Alphaproteobacteria	Rhodobacterales	Roseobacteraceae	Citreicella	1	Citreicella	genus	Ok
Bacteria		Pseudomonadota	Alphaproteobacteria	Rhodobacterales	Roseobacteraceae	Citreimonas	1	Citreimonas	genus	Ok
Bacteria		Actinomycetota	Actinomycetes	Micrococcales	Micrococcaceae	Citricoccus	1	Citricoccus	genus	Ok
Bacteria		Thermodesulfobacteriota	Desulfuromonadia	Geobacterales	Geobacteraceae	Citrifermentans	1	Citrifermentans	genus	Ok
Bacteria		Pseudomonadota	Gammaproteobacteria	Enterobacterales	Enterobacteriaceae	Citrobacter	1	Citrobacter	genus	Ok
Bacteria		Pseudomonadota	Alphaproteobacteria	Sphingomonadales	Sphingomonadaceae	Citromicrobium	1	Citromicrobium	genus	Ok
Bacteria		Actinomycetota	Actinomycetes	Micrococcales	Microbacteriaceae	Clavibacter	1	Clavibacter	genus	Ok
Bacteria		Synergistota	Synergistia	Synergistales	Synergistaceae	Cloacibacillus	1	Cloacibacillus	genus	Ok
Bacteria		Bacteroidota	Flavobacteriia	Flavobacteriales	Weeksellaceae	Cloacibacterium	1	Cloacibacterium	genus	Ok
Bacteria		Bacillota	Tissierellia	Tissierellales	Thermohalobacteraceae	Clostridiisalibacter	1	Clostridiisalibacter	genus	Ok
Bacteria		Bacillota	Clostridia	Eubacteriales	Peptostreptococcaceae	Clostridioides	1	Clostridioides	genus	Ok
Bacteria		Bacillota	Clostridia	Eubacteriales	Clostridiaceae	Clostridium	1	Clostridium	genus	Ok
Bacteria		Bacteroidota	Chitinophagia	Chitinophagales	Chitinophagaceae	Cnuella	1	Cnuella	genus	Ok
Bacteria		Pseudomonadota	Gammaproteobacteria	Oceanospirillales	Halomonadaceae	Cobetia	1	Cobetia	genus	Ok
Bacteria		Pseudomonadota	Alphaproteobacteria	Rhodobacterales	Paracoccaceae	Cognatishimia	1	Cognatishimia	genus	Ok
Bacteria		Pseudomonadota	Alphaproteobacteria	Hyphomicrobiales	Cohaesibacteraceae	Cohaesibacter	1	Cohaesibacter	genus	Ok
Bacteria		Bacillota	Bacilli	Bacillales	Paenibacillaceae	Cohnella	1	Cohnella	genus	Ok
Bacteria		Cyanobacteriota	Cyanophyceae	Oscillatoriales	Coleofasciculaceae	Coleofasciculus	1	Coleofasciculus	genus	Ok
Bacteria		Actinomycetota	Coriobacteriia	Coriobacteriales	Coriobacteriaceae	Collinsella	1	Collinsella	genus	Ok
Bacteria		Pseudomonadota	Gammaproteobacteria	Alteromonadales	Colwelliaceae	Colwellia	1	Colwellia	genus	Ok
Bacteria		Pseudomonadota	Betaproteobacteria	Burkholderiales	Comamonadaceae	Comamonas	1	Comamonas	genus	Ok
Bacteria		Pseudomonadota	Alphaproteobacteria	Rhodospirillales	Acetobacteraceae	Commensalibacter	1	Commensalibacter	genus	Ok
Bacteria		Bacillota	Bacilli	Lactobacillales	Lactobacillaceae	Companilactobacillus	1	Companilactobacillus	genus	Ok
Bacteria		Actinomycetota	Thermoleophilia	Solirubrobacterales	Conexibacteraceae	Conexibacter	1	Conexibacter	genus	Ok
Bacteria		Pseudomonadota	Gammaproteobacteria	Cellvibrionales	Halieaceae	Congregibacter	1	Congregibacter	genus	Ok
Bacteria		Pseudomonadota	Alphaproteobacteria	Hyphomicrobiales	Aurantimonadaceae	Consotaella	1	Consotaella	genus	Ok
Bacteria		Coprothermobacterota	Coprothermobacteria	Coprothermobacterales	Coprothermobacteraceae	Coprothermobacter	1	Coprothermobacter	genus	Ok
Bacteria		Pseudomonadota	Alphaproteobacteria	Rhodobacterales	Paracoccaceae	Coraliihabitans	1	Coraliihabitans	genus	Ok
Bacteria		Myxococcota	Myxococcia	Myxococcales	Myxococcaceae	Corallococcus	1	Corallococcus	genus	Ok
Bacteria		Pseudomonadota	Gammaproteobacteria	Xanthomonadales	Xanthomonadaceae	Coralloluteibacterium	1	Coralloluteibacterium	genus	Ok
Bacteria		Pseudomonadota	Alphaproteobacteria	Hyphomicrobiales	Phyllobacteriaceae	Corticibacterium	1	Corticibacterium	genus	Ok
Bacteria		Actinomycetota	Actinomycetes	Mycobacteriales	Corynebacteriaceae	Corynebacterium	1	Corynebacterium	genus	Ok
Bacteria						Coxiella	1	Coxiella	genus	Ok
Bacteria		Bacillota	Clostridia	Eubacteriales	Clostridiaceae	Crassaminicella	1	Crassaminicella	genus	Ok
Bacteria		Pseudomonadota	Betaproteobacteria	Neisseriales	Neisseriaceae	Crenobacter	1	Crenobacter	genus	Ok
Bacteria		Pseudomonadota	Alphaproteobacteria	Rhodobacterales	Paracoccaceae	Cribrihabitans	1	Cribrihabitans	genus	Ok
Bacteria		Pseudomonadota	Alphaproteobacteria	Sphingomonadales	Erythrobacteraceae	Croceibacterium	1	Croceibacterium	genus	Ok
Bacteria		Pseudomonadota	Alphaproteobacteria	Sphingomonadales	Erythrobacteraceae	Croceicoccus	1	Croceicoccus	genus	Ok
Bacteria		Bacteroidota	Flavobacteriia	Flavobacteriales	Crocinitomicaceae	Crocinitomix	1	Crocinitomix	genus	Ok
Bacteria		Cyanobacteriota	Cyanophyceae	Chroococcales	Aphanothecaceae	Crocosphaera	1	Crocosphaera	genus	Ok
Bacteria		Pseudomonadota	Gammaproteobacteria	Enterobacterales	Enterobacteriaceae	Cronobacter	1	Cronobacter	genus	Ok
Bacteria		Actinomycetota	Actinomycetes	Micrococcales	Microbacteriaceae	Cryobacterium	1	Cryobacterium	genus	Ok
Bacteria		Pseudomonadota	Alphaproteobacteria	Hyphomicrobiales	Devosiaceae	Cucumibacter	1	Cucumibacter	genus	Ok
Archaea		Candidatus Thermoplasmatota	Thermoplasmata	Thermoplasmatales	Cuniculiplasmataceae	Cuniculiplasma	1	Cuniculiplasma	genus	Ok
Bacteria		Thermodesulfobacteriota	Desulfovibrionia	Desulfovibrionales	Desulfovibrionaceae	Cupidesulfovibrio	1	Cupidesulfovibrio	genus	Ok
Bacteria		Pseudomonadota	Betaproteobacteria	Burkholderiales	Burkholderiaceae	Cupriavidus	1	Cupriavidus	genus	Ok
Bacteria		Actinomycetota	Actinomycetes	Micrococcales	Microbacteriaceae	Curtobacterium	1	Curtobacterium	genus	Ok
Bacteria		Pseudomonadota	Betaproteobacteria	Burkholderiales	Comamonadaceae	Curvibacter	1	Curvibacter	genus	Ok
Bacteria		Actinomycetota	Actinomycetes	Propionibacteriales	Propionibacteriaceae	Cutibacterium	1	Cutibacterium	genus	Ok
Bacteria		Cyanobacteriota	Cyanophyceae	Chroococcales	Chroococcaceae	Cyanosarcina	1	Cyanosarcina	genus	Ok
Bacteria		Cyanobacteriota	Cyanophyceae	Oscillatoriales	Cyanothecaceae	Cyanothece	1	Cyanothece	genus	Ok
Bacteria		Bacteroidota	Cytophagia	Cytophagales	Cyclobacteriaceae	Cyclobacterium	1	Cyclobacterium	genus	Ok
Bacteria		Pseudomonadota	Gammaproteobacteria	Thiotrichales	Piscirickettsiaceae	Cycloclasticus	1	Cycloclasticus	genus	Ok
Bacteria		Myxococcota	Myxococcia	Myxococcales	Archangiaceae	Cystobacter	1	Cystobacter	genus	Ok
Bacteria		Bacillota	Bacilli	Bacillales	Bacillaceae	Cytobacillus	1	Cytobacillus	genus	Ok
Bacteria		Bacteroidota	Cytophagia	Cytophagales	Cytophagaceae	Cytophaga	1	Cytophaga	genus	Ok
Bacteria		Actinomycetota	Actinomycetes	Micromonosporales	Micromonosporaceae	Dactylosporangium	1	Dactylosporangium	genus	Ok
Bacteria		Pseudomonadota	Alphaproteobacteria	Rhodospirillales	Acetobacteraceae	Dankookia	1	Dankookia	genus	Ok
Bacteria		Pseudomonadota	Betaproteobacteria	Rhodocyclales	Azonexaceae	Dechloromonas	1	Dechloromonas	genus	Ok
Bacteria		Deferribacterota	Deferribacteres	Deferribacterales	Deferribacteraceae	Deferribacter	1	Deferribacter	genus	Ok
Bacteria		Thermodesulfobacteriota	Deferrisomatia	Deferrisomatales	Deferrisomataceae	Deferrisoma	1	Deferrisoma	genus	Ok
Bacteria		Deferribacterota	Deferribacteres	Deferribacterales	Deferrivibrionaceae	Deferrivibrio	1	Deferrivibrio	genus	Ok
Bacteria		Pseudomonadota	Alphaproteobacteria	Rhodospirillales	Rhodospirillaceae	Defluviicoccus	1	Defluviicoccus	genus	Ok
Bacteria		Pseudomonadota	Alphaproteobacteria	Rhodobacterales	Paracoccaceae	Defluviimonas	1	Defluviimonas	genus	Ok
Bacteria		Bacillota	Clostridia	Eubacteriales	Defluviitaleaceae	Defluviitalea	1	Defluviitalea	genus	Ok
Bacteria		Thermotogota	Thermotogae	Petrotogales	Petrotogaceae	Defluviitoga	1	Defluviitoga	genus	Ok
Bacteria		Bacillota	Clostridia	Eubacteriales	Desulfitobacteriaceae	Dehalobacter	1	Dehalobacter	genus	Ok
Bacteria		Bacillota	Clostridia	Eubacteriales	Peptococcaceae	Dehalobacterium	1	Dehalobacterium	genus	Ok
Bacteria		Chloroflexota	Dehalococcoidia	Dehalococcoidales	Dehalococcoidaceae	Dehalococcoides	1	Dehalococcoides	genus	Ok
Bacteria		Chloroflexota	Dehalococcoidia			Dehalogenimonas	1	Dehalogenimonas	genus	Ok
Bacteria		Deinococcota	Deinococci	Deinococcales	Deinococcaceae	Deinococcus	1	Deinococcus	genus	Ok
Bacteria		Pseudomonadota	Betaproteobacteria	Burkholderiales	Comamonadaceae	Delftia	1	Delftia	genus	Ok
Bacteria		Actinomycetota	Actinomycetes	Micrococcales	Demequinaceae	Demequina	1	Demequina	genus	Ok
Bacteria		Bacillota	Negativicutes	Selenomonadales	Sporomusaceae	Dendrosporobacter	1	Dendrosporobacter	genus	Ok
Bacteria		Pseudomonadota	Betaproteobacteria	Nitrosomonadales	Sterolibacteriaceae	Denitratisoma	1	Denitratisoma	genus	Ok
Bacteria		Pseudomonadota	Gammaproteobacteria	Pseudomonadales	Pseudomonadaceae	Denitrificimonas	1	Denitrificimonas	genus	Ok
Bacteria		Deferribacterota	Deferribacteres	Deferribacterales	Geovibrionaceae	Denitrovibrio	1	Denitrovibrio	genus	Ok
Bacteria		Actinomycetota	Actinomycetes	Micrococcales	Dermabacteraceae	Dermabacter	1	Dermabacter	genus	Ok
Bacteria		Actinomycetota	Actinomycetes	Micrococcales	Dermacoccaceae	Dermacoccus	1	Dermacoccus	genus	Ok
Bacteria		Bacillota	Bacilli	Lactobacillales	Carnobacteriaceae	Desemzia	1	Desemzia	genus	Ok
Bacteria		Cyanobacteriota	Cyanophyceae	Desertifilales	Desertifilaceae	Desertifilum	1	Desertifilum	genus	Ok
Bacteria		Actinomycetota	Acidimicrobiia	Acidimicrobiales	Ilumatobacteraceae	Desertimonas	1	Desertimonas	genus	Ok
Bacteria		Bacillota	Bacilli	Bacillales	Thermoactinomycetaceae	Desmospora	1	Desmospora	genus	Ok
Bacteria		Thermodesulfobacteriota	Syntrophobacteria	Syntrophobacterales	Syntrophobacteraceae	Desulfacinum	1	Desulfacinum	genus	Ok
Bacteria		Bacillota	Clostridia	Eubacteriales	Desulfallaceae	Desulfallas	1	Desulfallas	genus	Ok
Bacteria		Thermodesulfobacteriota	Desulfobacteria	Desulfobacterales	Desulfobacteraceae	Desulfamplus	1	Desulfamplus	genus	Ok
Bacteria		Thermodesulfobacteriota	Desulfarculia	Desulfarculales	Desulfarculaceae	Desulfarculus	1	Desulfarculus	genus	Ok
Bacteria		Thermodesulfobacteriota	Desulfobacteria	Desulfobacterales	Desulfatibacillaceae	Desulfatibacillum	1	Desulfatibacillum	genus	Ok
Bacteria		Thermodesulfobacteriota	Desulfobacteria	Desulfobacterales	Desulfobacteraceae	Desulfatiglans	1	Desulfatiglans	genus	Ok
Bacteria		Thermodesulfobacteriota	Desulfobacteria	Desulfobacterales	Desulfatirhabdiaceae	Desulfatirhabdium	1	Desulfatirhabdium	genus	Ok
Bacteria		Thermodesulfobacteriota	Desulfobacteria	Desulfobacterales	Desulfosarcinaceae	Desulfatitalea	1	Desulfatitalea	genus	Ok
Bacteria		Bacillota	Clostridia	Moorellales	Desulfitibacteraceae	Desulfitibacter	1	Desulfitibacter	genus	Ok
Bacteria		Bacillota	Clostridia	Eubacteriales	Desulfitobacteriaceae	Desulfitobacterium	1	Desulfitobacterium	genus	Ok
Bacteria		Thermodesulfobacteriota	Desulfobaccia	Desulfobaccales	Desulfobaccaceae	Desulfobacca	1	Desulfobacca	genus	Ok
Bacteria		Thermodesulfobacteriota	Desulfobacteria	Desulfobacterales	Desulfobacteraceae	Desulfobacter	1	Desulfobacter	genus	Ok
Bacteria		Thermodesulfobacteriota	Desulfobacteria	Desulfobacterales	Desulfobacteriaceae	Desulfobacterium	1	Desulfobacterium	genus	Ok
Bacteria		Thermodesulfobacteriota	Desulfobacteria	Desulfobacterales	Desulfobacteraceae	Desulfobacula	1	Desulfobacula	genus	Ok
Bacteria		Thermodesulfobacteriota	Desulfobacteria	Desulfobacterales	Desulfobacteraceae	Desulfobotulus	1	Desulfobotulus	genus	Ok
Bacteria		Thermodesulfobacteriota	Desulfobulbia	Desulfobulbales	Desulfobulbaceae	Desulfobulbus	1	Desulfobulbus	genus	Ok
Bacteria		Thermodesulfobacteriota	Desulfobulbia	Desulfobulbales	Desulfocapsaceae	Desulfocapsa	1	Desulfocapsa	genus	Ok
Bacteria		Thermodesulfobacteriota	Desulfarculia	Desulfarculales	Desulfarculaceae	Desulfocarbo	1	Desulfocarbo	genus	Ok
Bacteria		Thermodesulfobacteriota	Desulfobacteria	Desulfobacterales	Desulfobacteraceae	Desulfocicer	1	Desulfocicer	genus	Ok
Bacteria		Thermodesulfobacteriota	Desulfobacteria	Desulfobacterales	Desulfococcaceae	Desulfococcus	1	Desulfococcus	genus	Ok
Bacteria		Bacillota	Clostridia	Eubacteriales	Desulfocucumaceae	Desulfocucumis	1	Desulfocucumis	genus	Ok
Bacteria		Thermodesulfobacteriota	Desulfovibrionia	Desulfovibrionales	Desulfovibrionaceae	Desulfocurvibacter	1	Desulfocurvibacter	genus	Ok
Bacteria		Thermodesulfobacteriota	Desulfovibrionia	Desulfovibrionales	Desulfovibrionaceae	Desulfocurvus	1	Desulfocurvus	genus	Ok
Bacteria		Bacillota	Clostridia	Eubacteriales	Peptococcaceae	Desulfofalx	1	Desulfofalx	genus	Ok
Bacteria		Bacillota	Clostridia	Eubacteriales	Peptococcaceae	Desulfofarcimen	1	Desulfofarcimen	genus	Ok
Bacteria		Bacillota	Clostridia	Eubacteriales	Peptococcaceae	Desulfofundulus	1	Desulfofundulus	genus	Ok
Bacteria		Thermodesulfobacteriota	Desulfobulbia	Desulfobulbales	Desulfocapsaceae	Desulfofustis	1	Desulfofustis	genus	Ok
Bacteria		Thermodesulfobacteriota	Syntrophobacteria	Syntrophobacterales	Syntrophobacteraceae	Desulfoglaeba	1	Desulfoglaeba	genus	Ok
Bacteria		Thermodesulfobacteriota	Desulfobulbia	Desulfobulbales	Desulfobulbaceae	Desulfogranum	1	Desulfogranum	genus	Ok
Bacteria		Thermodesulfobacteriota	Desulfovibrionia	Desulfovibrionales	Desulfohalobiaceae	Desulfohalobium	1	Desulfohalobium	genus	Ok
Bacteria		Thermodesulfobacteriota	Desulfovibrionia	Desulfovibrionales	Desulfovibrionaceae	Desulfohalovibrio	1	Desulfohalovibrio	genus	Ok
Bacteria						Desulfolucianica	1	Desulfolucianica		Ok
Bacteria		Thermodesulfobacteriota	Desulfobacteria	Desulfobacterales	Desulfolunaceae	Desulfoluna	1	Desulfoluna	genus	Ok
Bacteria		Thermodesulfobacteriota	Desulfovibrionia	Desulfovibrionales	Desulfomicrobiaceae	Desulfomicrobium	1	Desulfomicrobium	genus	Ok
Bacteria		Thermodesulfobacteriota	Desulfomonilia	Desulfomonilales	Desulfomonilaceae	Desulfomonile	1	Desulfomonile	genus	Ok
Bacteria		Thermodesulfobacteriota	Desulfovibrionia	Desulfovibrionales	Desulfonatronovibrionaceae	Desulfonatronospira	1	Desulfonatronospira	genus	Ok
Bacteria		Thermodesulfobacteriota	Desulfovibrionia	Desulfovibrionales	Desulfonatronovibrionaceae	Desulfonatronovibrio	1	Desulfonatronovibrio	genus	Ok
Bacteria		Thermodesulfobacteriota	Desulfovibrionia	Desulfovibrionales	Desulfonatronaceae	Desulfonatronum	1	Desulfonatronum	genus	Ok
Bacteria		Thermodesulfobacteriota	Desulfovibrionia	Desulfovibrionales	Desulfonauticaceae	Desulfonauticus	1	Desulfonauticus	genus	Ok
Bacteria		Thermodesulfobacteriota	Desulfobacteria	Desulfobacterales	Desulfococcaceae	Desulfonema	1	Desulfonema	genus	Ok
Bacteria		Bacillota	Clostridia	Eubacteriales	Peptococcaceae	Desulfonispora	1	Desulfonispora	genus	Ok
Bacteria		Thermodesulfobacteriota	Desulfobulbia	Desulfobulbales	Desulfocapsaceae	Desulfopila	1	Desulfopila	genus	Ok
Bacteria		Thermodesulfobacteriota	Desulfobulbia	Desulfobulbales	Desulfobulbaceae	Desulfoprunum	1	Desulfoprunum	genus	Ok
Bacteria		Bacillota	Clostridia	Eubacteriales	Peptococcaceae	Desulforadius	1	Desulforadius	genus	Ok
Bacteria		Bacillota	Clostridia	Eubacteriales	Peptococcaceae	Desulforamulus	1	Desulforamulus	genus	Ok
Bacteria		Thermodesulfobacteriota	Desulfobacteria	Desulfobacterales	Desulfobacteraceae	Desulforapulum	1	Desulforapulum	genus	Ok
Bacteria		Thermodesulfobacteriota	Syntrophobacteria	Syntrophobacterales	Syntrophobacteraceae	Desulforhabdus	1	Desulforhabdus	genus	Ok
Bacteria		Thermodesulfobacteriota	Desulfobulbia	Desulfobulbales	Desulfocapsaceae	Desulforhopalus	1	Desulforhopalus	genus	Ok
Bacteria		Thermodesulfobacteriota	Desulfobacteria	Desulfobacterales	Desulfosalsimonadaceae	Desulfosalsimonas	1	Desulfosalsimonas	genus	Ok
Bacteria		Thermodesulfobacteriota	Desulfobacteria	Desulfobacterales	Desulfosarcinaceae	Desulfosarcina	1	Desulfosarcina	genus	Ok
Bacteria		Bacillota	Clostridia	Eubacteriales	Desulfallaceae	Desulfoscipio	1	Desulfoscipio	genus	Ok
Bacteria		Thermodesulfobacteriota	Syntrophobacteria	Syntrophobacterales	Syntrophobacteraceae	Desulfosoma	1	Desulfosoma	genus	Ok
Bacteria		Thermodesulfobacteriota	Desulfobacteria	Desulfobacterales	Desulfobacteraceae	Desulfospira	1	Desulfospira	genus	Ok
Bacteria		Bacillota	Clostridia	Eubacteriales	Desulfitobacteriaceae	Desulfosporosinus	1	Desulfosporosinus	genus	Ok
Bacteria		Thermodesulfobacteriota	Desulfobacteria	Desulfobacterales	Desulfosudaceae	Desulfosudis	1	Desulfosudis	genus	Ok
Bacteria		Thermodesulfobacteriota	Desulfobacteria	Desulfobacterales	Desulfobacteraceae	Desulfotignum	1	Desulfotignum	genus	Ok
Bacteria		Bacillota	Clostridia	Eubacteriales	Desulfotomaculaceae	Desulfotomaculum	1	Desulfotomaculum	genus	Ok
Bacteria		Bacillota	Clostridia	Eubacteriales	Desulfallaceae	Desulfotruncus	1	Desulfotruncus	genus	Ok
Bacteria		Thermodesulfobacteriota	Desulfovibrionia	Desulfovibrionales	Desulfohalobiaceae	Desulfovermiculus	1	Desulfovermiculus	genus	Ok
Bacteria		Thermodesulfobacteriota	Desulfovibrionia	Desulfovibrionales	Desulfovibrionaceae	Desulfovibrio	1	Desulfovibrio	genus	Ok
Bacteria		Bacillota	Clostridia	Thermoanaerobacterales	Thermoanaerobacteraceae	Desulfovirgula	1	Desulfovirgula	genus	Ok
Bacteria		Campylobacterota	Desulfurellia	Desulfurellales	Desulfurellaceae	Desulfurella	1	Desulfurella	genus	Ok
Bacteria		Bacillota	Clostridia	Eubacteriales	Desulfotomaculaceae	Desulfurispora	1	Desulfurispora	genus	Ok
Bacteria		Thermodesulfobacteriota	Desulfobulbia	Desulfobulbales	Desulfobulbaceae	Desulfurivibrio	1	Desulfurivibrio	genus	Ok
Bacteria		Aquificota	Aquificae	Desulfurobacteriales	Desulfurobacteriaceae	Desulfurobacterium	1	Desulfurobacterium	genus	Ok
Bacteria		Thermodesulfobacteriota	Desulfuromonadia	Desulfuromonadales	Desulfuromonadaceae	Desulfuromonas	1	Desulfuromonas	genus	Ok
Bacteria		Thermodesulfobacteriota	Desulfuromonadia	Desulfuromonadales	Geopsychrobacteraceae	Desulfuromusa	1	Desulfuromusa	genus	Ok
Bacteria		Bacillota	Clostridia	Eubacteriales	Syntrophomonadaceae	Dethiobacter	1	Dethiobacter	genus	Ok
Bacteria		Thermodesulfobacteriota	Desulfarculia	Desulfarculales	Desulfarculaceae	Dethiosulfatarculus	1	Dethiosulfatarculus	genus	Ok
Bacteria		Bacillota	Tissierellia			Dethiosulfatibacter	1	Dethiosulfatibacter	genus	Ok
Bacteria		Synergistota	Synergistia	Synergistales	Dethiosulfovibrionaceae	Dethiosulfovibrio	1	Dethiosulfovibrio	genus	Ok
Bacteria		Pseudomonadota	Alphaproteobacteria	Hyphomicrobiales	Devosiaceae	Devosia	1	Devosia	genus	Ok
Bacteria		Bacillota	Negativicutes	Veillonellales	Veillonellaceae	Dialister	1	Dialister	genus	Ok
Bacteria		Actinomycetota	Actinomycetes	Micrococcales	Microbacteriaceae	Diaminobutyricibacter	1	Diaminobutyricibacter	genus	Ok
Bacteria		Pseudomonadota	Betaproteobacteria	Burkholderiales	Comamonadaceae	Diaphorobacter	1	Diaphorobacter	genus	Ok
Bacteria		Pseudomonadota	Gammaproteobacteria	Cardiobacteriales	Cardiobacteriaceae	Dichelobacter	1	Dichelobacter	genus	Ok
Bacteria		Pseudomonadota	Alphaproteobacteria	Hyphomicrobiales	Hyphomicrobiaceae	Dichotomicrobium	1	Dichotomicrobium	genus	Ok
Bacteria		Pseudomonadota	Gammaproteobacteria	Enterobacterales	Pectobacteriaceae	Dickeya	1	Dickeya	genus	Ok
Bacteria		Dictyoglomota	Dictyoglomia	Dictyoglomales	Dictyoglomaceae	Dictyoglomus	1	Dictyoglomus	genus	Ok
Bacteria		Bacillota	Erysipelotrichia	Erysipelotrichales	Erysipelotrichaceae	Dielma	1	Dielma	genus	Ok
Bacteria		Actinomycetota	Actinomycetes	Mycobacteriales	Dietziaceae	Dietzia	1	Dietzia	genus	Ok
Bacteria		Pseudomonadota	Alphaproteobacteria	Rhodobacterales	Roseobacteraceae	Dinoroseobacter	1	Dinoroseobacter	genus	Ok
Bacteria		Thermodesulfobacteriota	Dissulfuribacteria	Dissulfuribacterales	Dissulfuribacteraceae	Dissulfuribacter	1	Dissulfuribacter	genus	Ok
Bacteria			Deltaproteobacteria		Dissulfurirhabdaceae	Dissulfurirhabdus	1	Dissulfurirhabdus	genus	Ok
Bacteria		Pseudomonadota	Gammaproteobacteria	Xanthomonadales	Rhodanobacteraceae	Dokdonella	1	Dokdonella	genus	Ok
Bacteria		Cyanobacteriota	Cyanophyceae	Nostocales	Aphanizomenonaceae	Dolichospermum	1	Dolichospermum	genus	Ok
Bacteria		Bacillota	Bacilli	Lactobacillales	Carnobacteriaceae	Dolosigranulum	1	Dolosigranulum	genus	Ok
Bacteria		Bacillota	Bacilli	Bacillales	Bacillaceae	Domibacillus	1	Domibacillus	genus	Ok
Bacteria		Pseudomonadota	Alphaproteobacteria	Rhodobacterales	Roseobacteraceae	Donghicola	1	Donghicola	genus	Ok
Bacteria		Bacillota	Clostridia	Eubacteriales	Lachnospiraceae	Dorea	1	Dorea	genus	Ok
Bacteria		Bacteroidota	Bacteroidia	Marinilabiliales	Prolixibacteraceae	Draconibacterium	1	Draconibacterium	genus	Ok
Bacteria		Pseudomonadota	Betaproteobacteria	Burkholderiales	Oxalobacteraceae	Duganella	1	Duganella	genus	Ok
Bacteria		Bacteroidota	Cytophagia	Cytophagales	Spirosomaceae	Dyadobacter	1	Dyadobacter	genus	Ok
Bacteria		Pseudomonadota	Gammaproteobacteria	Xanthomonadales	Rhodanobacteraceae	Dyella	1	Dyella	genus	Ok
Bacteria		Bacteroidota	Bacteroidia	Bacteroidales	Dysgonomonadaceae	Dysgonomonas	1	Dysgonomonas	genus	Ok
Bacteria		Pseudomonadota	Gammaproteobacteria	Chromatiales	Ectothiorhodospiraceae	Ectothiorhodospira	1	Ectothiorhodospira	genus	Ok
Bacteria		Acidobacteriota	Terriglobia	Terriglobales	Acidobacteriaceae	Edaphobacter	1	Edaphobacter	genus	Ok
Bacteria						Edwardsiella	1	Edwardsiella	genus	Ok
Bacteria		Bacillota	Bacilli	Bacillales	Alicyclobacillaceae	Effusibacillus	1	Effusibacillus	genus	Ok
Bacteria		Actinomycetota	Coriobacteriia	Eggerthellales	Eggerthellaceae	Eggerthella	1	Eggerthella	genus	Ok
Bacteria		Actinomycetota	Nitriliruptoria	Egicoccales	Egicoccaceae	Egicoccus	1	Egicoccus	genus	Ok
Bacteria		Bacillota	Clostridia	Eubacteriales	Lachnospiraceae	Eisenbergiella	1	Eisenbergiella	genus	Ok
Bacteria		Bacteroidota	Cytophagia	Cytophagales	Reichenbachiellaceae	Ekhidna	1	Ekhidna	genus	Ok
Bacteria		Bacteroidota	Flavobacteriia	Flavobacteriales	Weeksellaceae	Elizabethkingia	1	Elizabethkingia	genus	Ok
Bacteria		Pseudomonadota	Alphaproteobacteria	Rhodospirillales	Rhodospirillaceae	Elstera	1	Elstera	genus	Ok
Bacteria		Pseudomonadota	Alphaproteobacteria	Emcibacterales	Emcibacteraceae	Emcibacter	1	Emcibacter	genus	Ok
Bacteria		Bacteroidota	Flavobacteriia	Flavobacteriales	Weeksellaceae	Empedobacter	1	Empedobacter	genus	Ok
Bacteria		Pseudomonadota	Alphaproteobacteria	Hyphomicrobiales	Rhizobiaceae	Endobacterium	1	Endobacterium	genus	Ok
Bacteria		Pseudomonadota	Gammaproteobacteria	Oceanospirillales	Endozoicomonadaceae	Endozoicomonas	1	Endozoicomonas	genus	Ok
Bacteria		Actinomycetota	Actinomycetes	Propionibacteriales	Propionibacteriaceae	Enemella	1	Enemella	genus	Ok
Bacteria		Pseudomonadota	Alphaproteobacteria	Hyphomicrobiales		Enhydrobacter	1	Enhydrobacter	genus	Ok
Bacteria		Myxococcota	Myxococcia	Myxococcales		Enhygromyxa	1	Enhygromyxa	genus	Ok
Bacteria		Pseudomonadota	Alphaproteobacteria	Hyphomicrobiales	Rhizobiaceae	Ensifer	1	Ensifer	genus	Ok
Bacteria		Actinomycetota	Actinomycetes	Micrococcales	Micrococcaceae	Enteractinococcus	1	Enteractinococcus	genus	Ok
Bacteria		Pseudomonadota	Gammaproteobacteria	Enterobacterales	Enterobacteriaceae	Enterobacter	1	Enterobacter	genus	Ok
Bacteria		Bacillota	Clostridia	Eubacteriales	Lachnospiraceae	Enterocloster	1	Enterocloster	genus	Ok
Bacteria		Bacillota	Bacilli	Lactobacillales	Enterococcaceae	Enterococcus	1	Enterococcus	genus	Ok
Bacteria		Pseudomonadota	Gammaproteobacteria	Vibrionales	Vibrionaceae	Enterovibrio	1	Enterovibrio	genus	Ok
Bacteria		Pseudomonadota	Alphaproteobacteria	Hyphomicrobiales	Methylobacteriaceae	Enterovirga	1	Enterovirga	genus	Ok
Bacteria		Spirochaetota	Spirochaetia	Spirochaetales	Spirochaetaceae	Entomospira	1	Entomospira	genus	Ok
Bacteria						Eoetvoesia	1	Eoetvoesia	genus	Ok
Bacteria		Pseudomonadota	Alphaproteobacteria	Rhodobacterales	Roseobacteraceae	Epibacterium	1	Epibacterium	genus	Ok
Bacteria		Actinomycetota	Actinomycetes	Sporichthyales	Sporichthyaceae	Epidermidibacterium	1	Epidermidibacterium	genus	Ok
Bacteria		Bacteroidota	Flavobacteriia	Flavobacteriales	Weeksellaceae	Epilithonimonas	1	Epilithonimonas	genus	Ok
Bacteria						Epulopiscium	1	Epulopiscium	genus	Ok
Bacteria		Pseudomonadota	Gammaproteobacteria	Enterobacterales	Erwiniaceae	Erwinia	1	Erwinia	genus	Ok
Bacteria		Bacillota	Erysipelotrichia	Erysipelotrichales	Erysipelotrichaceae	Erysipelothrix	1	Erysipelothrix	genus	Ok
Bacteria		Pseudomonadota	Alphaproteobacteria	Sphingomonadales	Erythrobacteraceae	Erythrobacter	1	Erythrobacter	genus	Ok
Bacteria		Pseudomonadota	Gammaproteobacteria	Enterobacterales	Enterobacteriaceae	Escherichia	1	Escherichia	genus	Ok
Bacteria		Bacillota	Clostridia	Eubacteriales	Eubacteriaceae	Eubacterium	1	Eubacterium	genus	Ok
Bacteria		Pseudomonadota	Alphaproteobacteria	Maricaulales	Maricaulaceae	Euryhalocaulis	1	Euryhalocaulis	genus	Ok
Bacteria		Pseudomonadota	Gammaproteobacteria	Enterobacterales	Yersiniaceae	Ewingella	1	Ewingella	genus	Ok
Bacteria		Bacillota	Bacilli	Bacillales		Exiguobacterium	1	Exiguobacterium	genus	Ok
Bacteria		Spirochaetota	Spirochaetia	Spirochaetales		Exilispira	1	Exilispira	genus	Ok
Bacteria		Pseudomonadota	Betaproteobacteria	Burkholderiales	Comamonadaceae	Extensimonas	1	Extensimonas	genus	Ok
Bacteria		Bacillota	Clostridia	Eubacteriales	Oscillospiraceae	Faecalibacterium	1	Faecalibacterium	genus	Ok
Bacteria		Pseudomonadota	Alphaproteobacteria	Rhodospirillales	Acetobacteraceae	Falsiroseomonas	1	Falsiroseomonas	genus	Ok
Bacteria		Pseudomonadota	Alphaproteobacteria	Rhodobacterales	Roseobacteraceae	Falsiruegeria	1	Falsiruegeria	genus	Ok
Bacteria		Pseudomonadota	Alphaproteobacteria	Hyphomicrobiales	Brucellaceae	Falsochrobactrum	1	Falsochrobactrum	genus	Ok
Bacteria		Actinomycetota	Actinomycetes	Actinomycetales	Actinomycetaceae	Fannyhessea	1	Fannyhessea	genus	Ok
Bacteria		Pseudomonadota	Gammaproteobacteria	Thiotrichales	Fastidiosibacteraceae	Fastidiosibacter	1	Fastidiosibacter	genus	Ok
Bacteria		Bacillota	Clostridia	Eubacteriales	Oscillospiraceae	Fastidiosipila	1	Fastidiosipila	genus	Ok
Bacteria		Bacteroidota	Bacteroidia	Bacteroidales	Dysgonomonadaceae	Fermentimonas	1	Fermentimonas	genus	Ok
Bacteria		Pseudomonadota	Gammaproteobacteria	Alteromonadales	Ferrimonadaceae	Ferrimonas	1	Ferrimonas	genus	Ok
Archaea		Euryarchaeota	Archaeoglobi	Archaeoglobales	Archaeoglobaceae	Ferroglobus	1	Ferroglobus	genus	Ok
Bacteria		Pseudomonadota	Betaproteobacteria	Ferrovales	Ferrovaceae	Ferrovum	1	Ferrovum	genus	Ok
Bacteria		Bacteroidota	Chitinophagia	Chitinophagales	Chitinophagaceae	Ferruginibacter	1	Ferruginibacter	genus	Ok
Bacteria		Pseudomonadota	Alphaproteobacteria	Rhodospirillales	Rhodospirillaceae	Ferruginivarius	1	Ferruginivarius	genus	Ok
Archaea		Thermoproteota	Thermoprotei	Fervidicoccales	Fervidicoccaceae	Fervidicoccus	1	Fervidicoccus	genus	Ok
Bacteria		Bacillota	Clostridia	Thermosediminibacterales	Thermosediminibacteraceae	Fervidicola	1	Fervidicola	genus	Ok
Bacteria		Thermotogota	Thermotogae	Thermotogales	Fervidobacteriaceae	Fervidobacterium	1	Fervidobacterium	genus	Ok
Bacteria		Bacteroidota	Cytophagia	Cytophagales	Spirosomaceae	Fibrella	1	Fibrella	genus	Ok
Bacteria		Bacteroidota	Cytophagia	Cytophagales	Spirosomaceae	Fibrisoma	1	Fibrisoma	genus	Ok
Bacteria		Fibrobacterota	Fibrobacteria	Fibrobacterales	Fibrobacteraceae	Fibrobacter	1	Fibrobacter	genus	Ok
Bacteria		Bacillota	Bacilli	Bacillales	Bacillaceae	Fictibacillus	1	Fictibacillus	genus	Ok
Bacteria		Bacteroidota	Chitinophagia	Chitinophagales	Chitinophagaceae	Filimonas	1	Filimonas	genus	Ok
Bacteria		Pseudomonadota	Alphaproteobacteria	Hyphomicrobiales	Hyphomicrobiaceae	Filomicrobium	1	Filomicrobium	genus	Ok
Bacteria		Planctomycetota	Planctomycetia	Gemmatales	Gemmataceae	Fimbriiglobus	1	Fimbriiglobus	genus	Ok
Bacteria		Armatimonadota	Fimbriimonadia	Fimbriimonadales	Fimbriimonadaceae	Fimbriimonas	1	Fimbriimonas	genus	Ok
Bacteria		Bacillota	Tissierellia	Tissierellales	Peptoniphilaceae	Finegoldia	1	Finegoldia	genus	Ok
Bacteria		Cyanobacteriota	Cyanophyceae	Nostocales	Hapalosiphonaceae	Fischerella	1	Fischerella	genus	Ok
Bacteria		Pseudomonadota	Gammaproteobacteria	Nevskiales	Sinobacteraceae	Flagellatimonas	1	Flagellatimonas	genus	Ok
Bacteria		Actinomycetota	Actinomycetes	Actinomycetales	Actinomycetaceae	Flaviflexus	1	Flaviflexus	genus	Ok
Bacteria		Bacteroidota	Chitinophagia	Chitinophagales	Chitinophagaceae	Flavihumibacter	1	Flavihumibacter	genus	Ok
Bacteria		Pseudomonadota	Alphaproteobacteria	Rhodobacterales	Paracoccaceae	Flavimaricola	1	Flavimaricola	genus	Ok
Bacteria		Bacteroidota	Chitinophagia	Chitinophagales	Chitinophagaceae	Flavipsychrobacter	1	Flavipsychrobacter	genus	Ok
Bacteria		Bacteroidota	Chitinophagia	Chitinophagales	Chitinophagaceae	Flavisolibacter	1	Flavisolibacter	genus	Ok
Bacteria		Bacteroidota	Flavobacteriia	Flavobacteriales	Flavobacteriaceae	Flavobacterium	1	Flavobacterium	genus	Ok
Bacteria		Bacillota	Clostridia	Eubacteriales	Oscillospiraceae	Flavonifractor	1	Flavonifractor	genus	Ok
Bacteria		Chloroflexota	Anaerolineae	Anaerolineales	Anaerolineaceae	Flexilinea	1	Flexilinea	genus	Ok
Bacteria		Deferribacterota	Deferribacteres	Deferribacterales	Flexistipitaceae	Flexistipes	1	Flexistipes	genus	Ok
Bacteria		Pseudomonadota	Alphaproteobacteria	Rhodobacterales	Paracoccaceae	Fluviibacterium	1	Fluviibacterium	genus	Ok
Bacteria		Pseudomonadota	Alphaproteobacteria	Hyphomicrobiales	Rhodovibrionaceae	Fodinicurvata	1	Fodinicurvata	genus	Ok
Bacteria		Bacillota	Clostridia	Eubacteriales	Clostridiaceae	Fonticella	1	Fonticella	genus	Ok
Bacteria		Bacillota	Clostridia	Eubacteriales	Oscillospiraceae	Fournierella	1	Fournierella	genus	Ok
Bacteria		Pseudomonadota	Gammaproteobacteria	Thiotrichales	Francisellaceae	Francisella	1	Francisella	genus	Ok
Bacteria		Pseudomonadota	Gammaproteobacteria	Enterobacterales	Enterobacteriaceae	Franconibacter	1	Franconibacter	genus	Ok
Bacteria		Actinomycetota	Actinomycetes	Frankiales	Frankiaceae	Frankia	1	Frankia	genus	Ok
Bacteria		Pseudomonadota	Gammaproteobacteria	Xanthomonadales	Rhodanobacteraceae	Frateuria	1	Frateuria	genus	Ok
Bacteria		Synergistota	Synergistia	Synergistales	Aminobacteriaceae	Fretibacterium	1	Fretibacterium	genus	Ok
Bacteria		Pseudomonadota	Alphaproteobacteria	Rhodobacterales	Paracoccaceae	Frigidibacter	1	Frigidibacter	genus	Ok
Bacteria		Actinomycetota	Actinomycetes	Micrococcales	Microbacteriaceae	Frigoribacterium	1	Frigoribacterium	genus	Ok
Bacteria		Actinomycetota	Actinomycetes	Micrococcales	Microbacteriaceae	Frondihabitans	1	Frondihabitans	genus	Ok
Bacteria		Bacillota	Clostridia	Halanaerobiales	Halobacteroidaceae	Fuchsiella	1	Fuchsiella	genus	Ok
Bacteria		Pseudomonadota	Alphaproteobacteria	Hyphomicrobiales	Aurantimonadaceae	Fulvimarina	1	Fulvimarina	genus	Ok
Bacteria		Pseudomonadota	Gammaproteobacteria	Xanthomonadales	Rhodanobacteraceae	Fulvimonas	1	Fulvimonas	genus	Ok
Bacteria		Bacillota	Bacilli	Lactobacillales	Aerococcaceae	Fundicoccus	1	Fundicoccus	genus	Ok
Bacteria		Pseudomonadota	Alphaproteobacteria	Rhodobacterales	Paracoccaceae	Fuscovulum	1	Fuscovulum	genus	Ok
Bacteria		Bacillota	Clostridia	Eubacteriales	Eubacteriales Family XII. Incertae Sedis	Fusibacter	1	Fusibacter	genus	Ok
Bacteria		Fusobacteriota	Fusobacteriia	Fusobacteriales	Fusobacteriaceae	Fusobacterium	1	Fusobacterium	genus	Ok
Bacteria		Bacteroidota	Bacteroidia	Bacteroidales	Rikenellaceae	Gallalistipes	1	Gallalistipes	genus	Ok
Bacteria		Bacillota	Tissierellia	Tissierellales	Peptoniphilaceae	Gallicola	1	Gallicola	genus	Ok
Bacteria		Pseudomonadota	Betaproteobacteria	Nitrosomonadales	Gallionellaceae	Gallionella	1	Gallionella	genus	Ok
Bacteria		Bacillota	Clostridia	Eubacteriales	Eubacteriaceae	Garciella	1	Garciella	genus	Ok
Bacteria		Actinomycetota	Actinomycetes	Bifidobacteriales	Bifidobacteriaceae	Gardnerella	1	Gardnerella	genus	Ok
Bacteria		Cyanobacteriota	Cyanophyceae	Oscillatoriales	Coleofasciculaceae	Geitlerinema	1	Geitlerinema	genus	Ok
Bacteria		Pseudomonadota	Alphaproteobacteria	Hyphomicrobiales	Rhizobiaceae	Gellertiella	1	Gellertiella	genus	Ok
Bacteria		Bacillota	Clostridia	Thermoanaerobacterales	Thermoanaerobacteraceae	Gelria	1	Gelria	genus	Ok
Bacteria		Bacillota	Bacilli	Bacillales		Gemella	1	Gemella	genus	Ok
Bacteria		Pseudomonadota	Alphaproteobacteria	Rhodospirillales	Geminicoccaceae	Geminicoccus	1	Geminicoccus	genus	Ok
Bacteria		Cyanobacteriota	Cyanophyceae	Chroococcales	Chroococcaceae	Geminocystis	1	Geminocystis	genus	Ok
Bacteria		Planctomycetota	Planctomycetia	Gemmatales	Gemmataceae	Gemmata	1	Gemmata	genus	Ok
Bacteria		Gemmatimonadota	Gemmatimonadetes	Gemmatimonadales	Gemmatimonadaceae	Gemmatimonas	1	Gemmatimonas	genus	Ok
Bacteria		Gemmatimonadota	Gemmatimonadetes	Gemmatimonadales	Gemmatimonadaceae	Gemmatirosa	1	Gemmatirosa	genus	Ok
Bacteria		Bacillota	Clostridia	Eubacteriales		Gemmiger	1	Gemmiger	genus	Ok
Bacteria		Pseudomonadota	Alphaproteobacteria	Rhodobacterales	Paracoccaceae	Gemmobacter	1	Gemmobacter	genus	Ok
Bacteria		Thermodesulfobacteriota	Desulfuromonadia	Desulfuromonadales	Geoalkalibacteraceae	Geoalkalibacter	1	Geoalkalibacter	genus	Ok
Bacteria		Bacillota	Bacilli	Bacillales	Bacillaceae	Geobacillus	1	Geobacillus	genus	Ok
Bacteria		Thermodesulfobacteriota	Desulfuromonadia	Geobacterales	Geobacteraceae	Geobacter	1	Geobacter	genus	Ok
Bacteria		Actinomycetota	Actinomycetes	Geodermatophilales	Geodermatophilaceae	Geodermatophilus	1	Geodermatophilus	genus	Ok
Archaea		Euryarchaeota	Archaeoglobi	Archaeoglobales	Archaeoglobaceae	Geoglobus	1	Geoglobus	genus	Ok
Bacteria		Thermodesulfobacteriota	Desulfuromonadia	Geobacterales	Geobacteraceae	Geomesophilobacter	1	Geomesophilobacter	genus	Ok
Bacteria		Thermodesulfobacteriota	Desulfuromonadia	Geobacterales	Geobacteraceae	Geomonas	1	Geomonas	genus	Ok
Bacteria		Thermodesulfobacteriota	Desulfuromonadia	Desulfuromonadales	Geopsychrobacteraceae	Geopsychrobacter	1	Geopsychrobacter	genus	Ok
Bacteria		Actinomycetota	Actinomycetes	Micrococcales	Bogoriellaceae	Georgenia	1	Georgenia	genus	Ok
Bacteria		Bacillota	Clostridia	Eubacteriales	Clostridiaceae	Geosporobacter	1	Geosporobacter	genus	Ok
Bacteria		Thermodesulfobacteriota	Desulfuromonadia	Geobacterales	Geobacteraceae	Geotalea	1	Geotalea	genus	Ok
Bacteria		Thermodesulfobacteriota	Desulfuromonadia	Desulfuromonadales	Geothermobacteraceae	Geothermobacter	1	Geothermobacter	genus	Ok
Bacteria		Acidobacteriota	Holophagae	Holophagales	Holophagaceae	Geothrix	1	Geothrix	genus	Ok
Bacteria		Thermotogota	Thermotogae	Petrotogales	Petrotogaceae	Geotoga	1	Geotoga	genus	Ok
Bacteria		Deferribacterota	Deferribacteres	Deferribacterales	Geovibrionaceae	Geovibrio	1	Geovibrio	genus	Ok
Bacteria		Pseudomonadota	Zetaproteobacteria			Ghiorsea	1	Ghiorsea	genus	Ok
Bacteria		Pseudomonadota	Gammaproteobacteria	Orbales	Orbaceae	Gilliamella	1	Gilliamella	genus	Ok
Bacteria		Planctomycetota	Planctomycetia	Planctomycetales	Planctomycetaceae	Gimesia	1	Gimesia	genus	Ok
Bacteria		Pseudomonadota	Gammaproteobacteria	Alteromonadales	Alteromonadaceae	Glaciecola	1	Glaciecola	genus	Ok
Bacteria		Pseudomonadota	Alphaproteobacteria	Rhodospirillales	Acetobacteraceae	Gluconacetobacter	1	Gluconacetobacter	genus	Ok
Bacteria		Pseudomonadota	Alphaproteobacteria	Rhodospirillales	Acetobacteraceae	Gluconobacter	1	Gluconobacter	genus	Ok
Bacteria		Actinomycetota	Actinomycetes	Micrococcales	Micrococcaceae	Glutamicibacter	1	Glutamicibacter	genus	Ok
Bacteria		Pseudomonadota	Alphaproteobacteria	Maricaulales	Maricaulaceae	Glycocaulis	1	Glycocaulis	genus	Ok
Bacteria		Actinomycetota	Actinomycetes	Glycomycetales	Glycomycetaceae	Glycomyces	1	Glycomyces	genus	Ok
Bacteria						Gordonia	1	Gordonia	genus	Ok
Bacteria		Actinomycetota	Coriobacteriia	Eggerthellales	Eggerthellaceae	Gordonibacter	1	Gordonibacter	genus	Ok
Bacteria		Bacillota	Bacilli	Bacillales	Bacillaceae	Gottfriedia	1	Gottfriedia	genus	Ok
Bacteria		Bacillota	Tissierellia	Tissierellales	Gottschalkiaceae	Gottschalkia	1	Gottschalkia	genus	Ok
Bacteria		Bacillota	Bacilli	Bacillales	Bacillaceae	Gracilibacillus	1	Gracilibacillus	genus	Ok
Bacteria		Bacillota	Clostridia	Eubacteriales	Gracilibacteraceae	Gracilibacter	1	Gracilibacter	genus	Ok
Bacteria		Balneolota	Balneolia	Balneolales	Balneolaceae	Gracilimonas	1	Gracilimonas	genus	Ok
Bacteria		Spirochaetota	Spirochaetia	Spirochaetales	Breznakiellaceae	Gracilinema	1	Gracilinema	genus	Ok
Bacteria		Bacillota	Bacilli	Lactobacillales	Carnobacteriaceae	Granulicatella	1	Granulicatella	genus	Ok
Bacteria		Acidobacteriota	Terriglobia	Terriglobales	Acidobacteriaceae	Granulicella	1	Granulicella	genus	Ok
Bacteria		Actinomycetota	Actinomycetes	Micrococcales	Microbacteriaceae	Gryllotalpicola	1	Gryllotalpicola	genus	Ok
Bacteria		Bacillota	Tissierellia	Tissierellales	Tissierellaceae	Gudongella	1	Gudongella	genus	Ok
Bacteria		Actinomycetota	Actinomycetes	Micrococcales	Microbacteriaceae	Gulosibacter	1	Gulosibacter	genus	Ok
Bacteria		Pseudomonadota	Gammaproteobacteria	Chromatiales	Thioalkalibacteraceae	Guyparkeria	1	Guyparkeria	genus	Ok
Bacteria		Pseudomonadota	Alphaproteobacteria	Rhodobacterales	Paracoccaceae	Haematobacter	1	Haematobacter	genus	Ok
Bacteria		Pseudomonadota	Alphaproteobacteria	Rhodospirillales	Rhodospirillaceae	Haematospirillum	1	Haematospirillum	genus	Ok
Bacteria		Pseudomonadota	Gammaproteobacteria	Pasteurellales	Pasteurellaceae	Haemophilus	1	Haemophilus	genus	Ok
Bacteria		Pseudomonadota	Gammaproteobacteria	Enterobacterales	Hafniaceae	Hafnia	1	Hafnia	genus	Ok
Archaea		Euryarchaeota	Halobacteria	Halobacteriales	Halobacteriaceae	Haladaptatus	1	Haladaptatus	genus	Ok
Bacteria						Halalkalibacterium	1	Halalkalibacterium	genus	Ok
Archaea		Euryarchaeota	Halobacteria	Halobacteriales	Halobacteriaceae	Halalkalicoccus	1	Halalkalicoccus	genus	Ok
Archaea		Euryarchaeota	Halobacteria	Halobacteriales	Halobacteriaceae	Halanaeroarchaeum	1	Halanaeroarchaeum	genus	Ok
Bacteria		Bacillota	Clostridia	Halanaerobiales	Halobacteroidaceae	Halanaerobacter	1	Halanaerobacter	genus	Ok
Bacteria		Bacillota	Clostridia	Halanaerobiales	Halanaerobiaceae	Halanaerobium	1	Halanaerobium	genus	Ok
Bacteria		Bacillota	Clostridia	Halanaerobiales	Halarsenatibacteraceae	Halarsenatibacter	1	Halarsenatibacter	genus	Ok
Bacteria		Pseudomonadota	Gammaproteobacteria	Cellvibrionales	Halieaceae	Haliea	1	Haliea	genus	Ok
Bacteria		Pseudomonadota	Gammaproteobacteria	Cellvibrionales	Halieaceae	Halioglobus	1	Halioglobus	genus	Ok
Bacteria		Bacteroidota	Saprospiria	Saprospirales	Haliscomenobacteraceae	Haliscomenobacter	1	Haliscomenobacter	genus	Ok
Bacteria		Actinomycetota	Actinomycetes	Streptosporangiales	Nocardiopsaceae	Haloactinospora	1	Haloactinospora	genus	Ok
Archaea		Euryarchaeota	Halobacteria	Halobacteriales	Haloarculaceae	Haloarcula	1	Haloarcula	genus	Ok
Bacteria		Bacillota	Bacilli	Bacillales	Bacillaceae	Halobacillus	1	Halobacillus	genus	Ok
Bacteria		Bdellovibrionota	Bacteriovoracia	Bacteriovoracales	Halobacteriovoraceae	Halobacteriovorax	1	Halobacteriovorax	genus	Ok
Archaea		Euryarchaeota	Halobacteria	Halobacteriales	Halobacteriaceae	Halocalculus	1	Halocalculus	genus	Ok
Bacteria		Bacillota	Clostridia	Halanaerobiales	Halanaerobiaceae	Halocella	1	Halocella	genus	Ok
Archaea		Euryarchaeota	Halobacteria	Halobacteriales	Halococcaceae	Halococcus	1	Halococcus	genus	Ok
Archaea		Euryarchaeota	Halobacteria	Haloferacales	Haloferacaceae	Haloferax	1	Haloferax	genus	Ok
Archaea		Euryarchaeota	Halobacteria	Haloferacales	Halorubraceae	Halohasta	1	Halohasta	genus	Ok
Bacteria		Bacillota	Bacilli	Bacillales	Bacillaceae	Halolactibacillus	1	Halolactibacillus	genus	Ok
Archaea		Euryarchaeota	Halobacteria	Halobacteriales	Haloarculaceae	Halomicroarcula	1	Halomicroarcula	genus	Ok
Bacteria		Cyanobacteriota	Cyanophyceae	Pseudanabaenales	Prochlorotrichaceae	Halomicronema	1	Halomicronema	genus	Ok
Bacteria		Pseudomonadota	Gammaproteobacteria	Oceanospirillales	Halomonadaceae	Halomonas	1	Halomonas	genus	Ok
Bacteria		Bacillota	Clostridia	Halanaerobiales	Halobacteroidaceae	Halonatronum	1	Halonatronum	genus	Ok
Bacteria		Pseudomonadota	Gammaproteobacteria	Pseudomonadales	Pseudomonadaceae	Halopseudomonas	1	Halopseudomonas	genus	Ok
Bacteria		Pseudomonadota	Gammaproteobacteria	Chromatiales	Ectothiorhodospiraceae	Halorhodospira	1	Halorhodospira	genus	Ok
Archaea		Euryarchaeota	Halobacteria	Haloferacales	Halorubraceae	Halorubrum	1	Halorubrum	genus	Ok
Bacteria		Pseudomonadota	Gammaproteobacteria			Halospina	1	Halospina	genus	Ok
Bacteria		Pseudomonadota	Gammaproteobacteria	Oceanospirillales	Halomonadaceae	Halotalea	1	Halotalea	genus	Ok
Archaea		Euryarchaeota	Halobacteria	Natrialbales	Natrialbaceae	Haloterrigena	1	Haloterrigena	genus	Ok
Bacteria		Bacillota	Clostridia	Halanaerobiales	Halothermotrichaceae	Halothermothrix	1	Halothermothrix	genus	Ok
Bacteria		Pseudomonadota	Gammaproteobacteria	Chromatiales	Halothiobacillaceae	Halothiobacillus	1	Halothiobacillus	genus	Ok
Bacteria		Pseudomonadota	Alphaproteobacteria	Rhodobacterales	Paracoccaceae	Halovulum	1	Halovulum	genus	Ok
Bacteria		Pseudomonadota	Alphaproteobacteria	Hyphomicrobiales	Methylocystaceae	Hansschlegelia	1	Hansschlegelia	genus	Ok
Bacteria		Bacteroidota	Flavobacteriia	Flavobacteriales	Flavobacteriaceae	Hanstruepera	1	Hanstruepera	genus	Ok
Bacteria		Pseudomonadota	Alphaproteobacteria	Hyphomicrobiales	Pleomorphomonadaceae	Hartmannibacter	1	Hartmannibacter	genus	Ok
Bacteria		Campylobacterota	Epsilonproteobacteria	Campylobacterales	Helicobacteraceae	Helicobacter	1	Helicobacter	genus	Ok
Bacteria		Bacillota	Clostridia	Eubacteriales	Heliobacteriaceae	Heliobacterium	1	Heliobacterium	genus	Ok
Bacteria		Bacillota	Clostridia	Eubacteriales	Heliobacteriaceae	Heliomicrobium	1	Heliomicrobium	genus	Ok
Bacteria		Bacteroidota	Bacteroidia	Bacteroidales	Muribaculaceae	Heminiphilus	1	Heminiphilus	genus	Ok
Bacteria		Pseudomonadota	Alphaproteobacteria	Hyphomonadales	Hyphomonadaceae	Henriciella	1	Henriciella	genus	Ok
Bacteria		Pseudomonadota	Betaproteobacteria	Burkholderiales	Oxalobacteraceae	Herbaspirillum	1	Herbaspirillum	genus	Ok
Bacteria		Actinomycetota	Actinomycetes	Micrococcales	Microbacteriaceae	Herbiconiux	1	Herbiconiux	genus	Ok
Bacteria		Bacillota	Clostridia	Eubacteriales	Lachnospiraceae	Herbinix	1	Herbinix	genus	Ok
Bacteria		Pseudomonadota	Betaproteobacteria	Burkholderiales	Oxalobacteraceae	Herminiimonas	1	Herminiimonas	genus	Ok
Bacteria		Chloroflexota	Chloroflexia	Herpetosiphonales	Herpetosiphonaceae	Herpetosiphon	1	Herpetosiphon	genus	Ok
Bacteria		Bacillota	Bacilli	Bacillales	Bacillaceae	Heyndrickxia	1	Heyndrickxia	genus	Ok
Bacteria		Campylobacterota	Desulfurellia	Desulfurellales	Hippeaceae	Hippea	1	Hippea	genus	Ok
Bacteria		Pseudomonadota	Alphaproteobacteria	Hyphomonadales	Hyphomonadaceae	Hirschia	1	Hirschia	genus	Ok
Bacteria		Pseudomonadota	Alphaproteobacteria	Rhodobacterales	Paracoccaceae	Histidinibacterium	1	Histidinibacterium	genus	Ok
Bacteria		Pseudomonadota	Alphaproteobacteria	Hyphomicrobiales	Phyllobacteriaceae	Hoeflea	1	Hoeflea	genus	Ok
Bacteria		Pseudomonadota	Alphaproteobacteria	Hyphomicrobiales	Stappiaceae	Hongsoonwoonella	1	Hongsoonwoonella	genus	Ok
Bacteria		Actinomycetota	Actinomycetes	Micrococcales	Microbacteriaceae	Humibacter	1	Humibacter	genus	Ok
Bacteria		Bacillota	Clostridia	Eubacteriales	Clostridiaceae	Hungatella	1	Hungatella	genus	Ok
Bacteria		Pseudomonadota	Alphaproteobacteria	Rhodospirillales	Rhodospirillaceae	Hwanghaeella	1	Hwanghaeella	genus	Ok
Bacteria		Pseudomonadota	Alphaproteobacteria	Rhodobacterales	Roseobacteraceae	Hwanghaeicola	1	Hwanghaeicola	genus	Ok
Bacteria		Myxococcota	Myxococcia	Myxococcales	Archangiaceae	Hyalangium	1	Hyalangium	genus	Ok
Bacteria		Bacteroidota	Chitinophagia	Chitinophagales	Chitinophagaceae	Hydrobacter	1	Hydrobacter	genus	Ok
Bacteria		Pseudomonadota	Gammaproteobacteria	Alteromonadales	Alteromonadaceae	Hydrocarboniclastica	1	Hydrocarboniclastica	genus	Ok
Bacteria		Pseudomonadota	Gammaproteobacteria	Nevskiales	Sinobacteraceae	Hydrocarboniphaga	1	Hydrocarboniphaga	genus	Ok
Bacteria						Hydrogeniiclostidium	1	Hydrogeniiclostidium	genus	Ok
Bacteria		Campylobacterota	Epsilonproteobacteria	Campylobacterales	Hydrogenimonadaceae	Hydrogenimonas	1	Hydrogenimonas	genus	Ok
Bacteria		Bacillota				Hydrogenispora	1	Hydrogenispora	genus	Ok
Bacteria		Aquificota	Aquificae	Aquificales	Aquificaceae	Hydrogenobacter	1	Hydrogenobacter	genus	Ok
Bacteria		Pseudomonadota	Betaproteobacteria	Burkholderiales	Comamonadaceae	Hydrogenophaga	1	Hydrogenophaga	genus	Ok
Bacteria		Pseudomonadota	Hydrogenophilia	Hydrogenophilales	Hydrogenophilaceae	Hydrogenophilus	1	Hydrogenophilus	genus	Ok
Bacteria		Aquificota	Aquificae	Aquificales	Hydrogenothermaceae	Hydrogenothermus	1	Hydrogenothermus	genus	Ok
Bacteria		Pseudomonadota	Gammaproteobacteria	Thiotrichales	Piscirickettsiaceae	Hydrogenovibrio	1	Hydrogenovibrio	genus	Ok
Bacteria		Pseudomonadota	Betaproteobacteria	Burkholderiales	Comamonadaceae	Hylemonella	1	Hylemonella	genus	Ok
Bacteria		Bacteroidota	Cytophagia	Cytophagales	Hymenobacteraceae	Hymenobacter	1	Hymenobacter	genus	Ok
Bacteria		Pseudomonadota	Alphaproteobacteria	Rhodospirillales	Rhodospirillaceae	Hypericibacter	1	Hypericibacter	genus	Ok
Bacteria		Pseudomonadota	Alphaproteobacteria	Hyphomicrobiales	Hyphomicrobiaceae	Hyphomicrobium	1	Hyphomicrobium	genus	Ok
Bacteria		Pseudomonadota	Alphaproteobacteria	Hyphomonadales	Hyphomonadaceae	Hyphomonas	1	Hyphomonas	genus	Ok
Bacteria		Fusobacteriota	Fusobacteriia	Fusobacteriales	Fusobacteriaceae	Hypnocyclicus	1	Hypnocyclicus	genus	Ok
Bacteria		Actinomycetota	Acidimicrobiia	Acidimicrobiales	Iamiaceae	Iamia	1	Iamia	genus	Ok
Bacteria		Pseudomonadota	Gammaproteobacteria	Alteromonadales	Idiomarinaceae	Idiomarina	1	Idiomarina	genus	Ok
Bacteria		Ignavibacteriota	Ignavibacteria	Ignavibacteriales	Ignavibacteriaceae	Ignavibacterium	1	Ignavibacterium	genus	Ok
Archaea		Thermoproteota	Thermoprotei	Desulfurococcales	Desulfurococcaceae	Ignisphaera	1	Ignisphaera	genus	Ok
Bacteria		Fusobacteriota	Fusobacteriia	Fusobacteriales	Fusobacteriaceae	Ilyobacter	1	Ilyobacter	genus	Ok
Bacteria		Pseudomonadota	Gammaproteobacteria	Chromatiales	Chromatiaceae	Imhoffiella	1	Imhoffiella	genus	Ok
Bacteria		Pseudomonadota	Gammaproteobacteria	Immundisolibacterales	Immundisolibacteraceae	Immundisolibacter	1	Immundisolibacter	genus	Ok
Bacteria		Bacteroidota	Cytophagia	Cytophagales	Cyclobacteriaceae	Indibacter	1	Indibacter	genus	Ok
Bacteria		Pseudomonadota	Alphaproteobacteria	Rhodospirillales	Azospirillaceae	Indioceanicola	1	Indioceanicola	genus	Ok
Archaea		Thermoproteota	Thermoprotei	Thermofilales	Thermofilaceae	Infirmifilum	1	Infirmifilum	genus	Ok
Bacteria		Pseudomonadota	Alphaproteobacteria	Rhodospirillales	Rhodospirillaceae	Inquilinus	1	Inquilinus	genus	Ok
Bacteria		Pseudomonadota	Alphaproteobacteria	Rhodospirillales	Rhodospirillaceae	Insolitispirillum	1	Insolitispirillum	genus	Ok
Bacteria		Bacillota	Clostridia	Eubacteriales	Eubacteriaceae	Intestinibacillus	1	Intestinibacillus	genus	Ok
Bacteria		Bacillota	Clostridia	Eubacteriales		Intestinimonas	1	Intestinimonas	genus	Ok
Bacteria		Actinomycetota	Actinomycetes	Micrococcales	Intrasporangiaceae	Intrasporangium	1	Intrasporangium	genus	Ok
Bacteria		Bacillota	Clostridia	Halanaerobiales	Halanaerobiaceae	Iocasia	1	Iocasia	genus	Ok
Bacteria		Pseudomonadota	Alphaproteobacteria	Iodidimonadales	Iodidimonadaceae	Iodidimonas	1	Iodidimonas	genus	Ok
Bacteria		Actinomycetota	Actinomycetes	Micrococcales	Promicromonosporaceae	Isoptericola	1	Isoptericola	genus	Ok
Bacteria		Actinomycetota	Actinomycetes	Micrococcales	Intrasporangiaceae	Janibacter	1	Janibacter	genus	Ok
Bacteria		Pseudomonadota	Alphaproteobacteria	Rhodobacterales	Roseobacteraceae	Jannaschia	1	Jannaschia	genus	Ok
Bacteria		Pseudomonadota	Betaproteobacteria	Burkholderiales	Oxalobacteraceae	Janthinobacterium	1	Janthinobacterium	genus	Ok
Bacteria		Bacillota	Bacilli	Bacillales	Planococcaceae	Jeotgalibacillus	1	Jeotgalibacillus	genus	Ok
Bacteria		Bacillota	Bacilli	Bacillales	Staphylococcaceae	Jeotgalicoccus	1	Jeotgalicoccus	genus	Ok
Bacteria		Pseudomonadota	Alphaproteobacteria	Rhodobacterales	Paracoccaceae	Jhaorihella	1	Jhaorihella	genus	Ok
Bacteria		Actinomycetota	Actinomycetes	Jiangellales	Jiangellaceae	Jiangella	1	Jiangella	genus	Ok
Bacteria		Pseudomonadota	Alphaproteobacteria	Hyphomicrobiales	Aurantimonadaceae	Jiella	1	Jiella	genus	Ok
Bacteria		Bacteroidota	Flavobacteriia	Flavobacteriales	Weeksellaceae	Kaistella	1	Kaistella	genus	Ok
Bacteria		Pseudomonadota	Alphaproteobacteria	Hyphomicrobiales	Kaistiaceae	Kaistia	1	Kaistia	genus	Ok
Bacteria		Pseudomonadota	Gammaproteobacteria	Enterobacterales	Erwiniaceae	Kalamiella	1	Kalamiella	genus	Ok
Bacteria		Pseudomonadota	Alphaproteobacteria	Rhodobacterales	Paracoccaceae	Kandeliimicrobium	1	Kandeliimicrobium	genus	Ok
Bacteria		Pseudomonadota	Alphaproteobacteria	Hyphomicrobiales	Parvibaculaceae	Kaustia	1	Kaustia	genus	Ok
Bacteria		Bacillota	Tissierellia	Tissierellales	Tepidimicrobiaceae	Keratinibaculum	1	Keratinibaculum	genus	Ok
Bacteria		Pseudomonadota	Betaproteobacteria	Burkholderiales	Alcaligenaceae	Kerstersia	1	Kerstersia	genus	Ok
Bacteria		Pseudomonadota	Gammaproteobacteria	Oceanospirillales	Alcanivoracaceae	Ketobacter	1	Ketobacter	genus	Ok
Bacteria		Pseudomonadota	Alphaproteobacteria	Rhodobacterales	Roseobacteraceae	Ketogulonicigenium	1	Ketogulonicigenium	genus	Ok
Bacteria		Actinomycetota	Actinomycetes	Kineosporiales	Kineosporiaceae	Kineococcus	1	Kineococcus	genus	Ok
Bacteria		Actinomycetota	Actinomycetes	Micrococcales	Dermatophilaceae	Kineosphaera	1	Kineosphaera	genus	Ok
Bacteria		Bacillota	Clostridia	Eubacteriales	Lachnospiraceae	Kineothrix	1	Kineothrix	genus	Ok
Bacteria		Pseudomonadota	Betaproteobacteria	Neisseriales	Neisseriaceae	Kingella	1	Kingella	genus	Ok
Bacteria		Kiritimatiellota	Kiritimatiellia	Kiritimatiellales	Kiritimatiellaceae	Kiritimatiella	1	Kiritimatiella	genus	Ok
Bacteria		Actinomycetota	Actinomycetes	Kitasatosporales	Streptomycetaceae	Kitasatospora	1	Kitasatospora	genus	Ok
Bacteria		Pseudomonadota	Gammaproteobacteria	Enterobacterales	Enterobacteriaceae	Klebsiella	1	Klebsiella	genus	Ok
Bacteria		Actinomycetota	Actinomycetes	Geodermatophilales	Geodermatophilaceae	Klenkia	1	Klenkia	genus	Ok
Bacteria		Actinomycetota	Actinomycetes	Micrococcales	Intrasporangiaceae	Knoellia	1	Knoellia	genus	Ok
Bacteria		Actinomycetota	Actinomycetes	Micrococcales	Micrococcaceae	Kocuria	1	Kocuria	genus	Ok
Bacteria		Bacillota	Clostridia	Koleobacterales	Koleobacteraceae	Koleobacter	1	Koleobacter	genus	Ok
Bacteria		Pseudomonadota	Alphaproteobacteria	Rhodospirillales	Acetobacteraceae	Komagataeibacter	1	Komagataeibacter	genus	Ok
Bacteria		Pseudomonadota	Alphaproteobacteria	Kordiimonadales	Kordiimonadaceae	Kordiimonas	1	Kordiimonas	genus	Ok
Bacteria		Thermotogota	Thermotogae	Kosmotogales	Kosmotogaceae	Kosmotoga	1	Kosmotoga	genus	Ok
Bacteria		Chloroflexota	Chloroflexia	Chloroflexales	Roseiflexaceae	Kouleothrix	1	Kouleothrix	genus	Ok
Bacteria		Cyanobacteriota	Cyanophyceae	Pseudanabaenales	Leptolyngbyaceae	Kovacikia	1	Kovacikia	genus	Ok
Bacteria		Actinomycetota	Actinomycetes	Propionibacteriales	Kribbellaceae	Kribbella	1	Kribbella	genus	Ok
Bacteria		Bacillota	Bacilli	Bacillales	Thermoactinomycetaceae	Kroppenstedtia	1	Kroppenstedtia	genus	Ok
Bacteria		Chloroflexota	Ktedonobacteria	Ktedonobacterales	Ktedonobacteraceae	Ktedonobacter	1	Ktedonobacter	genus	Ok
Bacteria		Bacillota	Bacilli	Bacillales	Planococcaceae	Kurthia	1	Kurthia	genus	Ok
Bacteria		Pseudomonadota	Gammaproteobacteria	Oceanospirillales	Halomonadaceae	Kushneria	1	Kushneria	genus	Ok
Bacteria		Bacillota	Bacilli	Bacillales	Alicyclobacillaceae	Kyrpidia	1	Kyrpidia	genus	Ok
Bacteria		Actinomycetota	Actinomycetes	Micrococcales	Kytococcaceae	Kytococcus	1	Kytococcus	genus	Ok
Bacteria		Bacteroidota	Bacteroidia	Marinilabiliales	Marinifilaceae	Labilibaculum	1	Labilibaculum	genus	Ok
Bacteria		Myxococcota		Polyangiales	Labilitrichaceae	Labilithrix	1	Labilithrix	genus	Ok
Bacteria						Labrys	1	Labrys	genus	Ok
Bacteria		Bacillota	Clostridia	Eubacteriales	Lachnospiraceae	Lachnoanaerobaculum	1	Lachnoanaerobaculum	genus	Ok
Bacteria		Bacillota	Clostridia	Eubacteriales	Lachnospiraceae	Lachnoclostridium	1	Lachnoclostridium	genus	Ok
Bacteria		Actinomycetota	Actinomycetes	Micrococcales	Microbacteriaceae	Lacisediminihabitans	1	Lacisediminihabitans	genus	Ok
Bacteria		Pseudomonadota	Betaproteobacteria	Burkholderiales	Oxalobacteraceae	Lacisediminimonas	1	Lacisediminimonas	genus	Ok
Bacteria		Bacillota	Bacilli	Lactobacillales	Lactobacillaceae	Lacticaseibacillus	1	Lacticaseibacillus	genus	Ok
Bacteria		Bacillota	Bacilli	Lactobacillales	Lactobacillaceae	Lactiplantibacillus	1	Lactiplantibacillus	genus	Ok
Bacteria		Bacillota	Bacilli	Lactobacillales	Lactobacillaceae	Lactobacillus	1	Lactobacillus	genus	Ok
Bacteria		Bacillota	Bacilli	Lactobacillales	Streptococcaceae	Lactococcus	1	Lactococcus	genus	Ok
Bacteria		Pseudomonadota	Betaproteobacteria	Burkholderiales	Comamonadaceae	Lampropedia	1	Lampropedia	genus	Ok
Bacteria		Actinomycetota	Actinomycetes	Micrococcales	Intrasporangiaceae	Lapillicoccus	1	Lapillicoccus	genus	Ok
Bacteria		Pseudomonadota	Betaproteobacteria	Neisseriales	Chromobacteriaceae	Laribacter	1	Laribacter	genus	Ok
Bacteria		Bacteroidota	Cytophagia	Cytophagales	Spirosomaceae	Larkinella	1	Larkinella	genus	Ok
Bacteria		Pseudomonadota	Gammaproteobacteria	Oceanospirillales	Halomonadaceae	Larsenimonas	1	Larsenimonas	genus	Ok
Bacteria		Bacteroidota	Bacteroidia	Bacteroidales	Porphyromonadaceae	Lascolabacillus	1	Lascolabacillus	genus	Ok
Bacteria		Bacillota	Bacilli	Lactobacillales	Lactobacillaceae	Latilactobacillus	1	Latilactobacillus	genus	Ok
Bacteria		Pseudomonadota	Betaproteobacteria	Burkholderiales	Burkholderiaceae	Lautropia	1	Lautropia	genus	Ok
Bacteria		Actinomycetota	Actinomycetes	Mycobacteriales	Lawsonellaceae	Lawsonella	1	Lawsonella	genus	Ok
Bacteria		Bacillota	Clostridia	Eubacteriales	Oscillospiraceae	Lawsonibacter	1	Lawsonibacter	genus	Ok
Bacteria		Campylobacterota	Epsilonproteobacteria	Nautiliales	Nautiliaceae	Lebetimonas	1	Lebetimonas	genus	Ok
Bacteria		Pseudomonadota	Gammaproteobacteria	Enterobacterales	Enterobacteriaceae	Leclercia	1	Leclercia	genus	Ok
Bacteria		Actinomycetota	Actinomycetes	Micrococcales	Dermacoccaceae	Leekyejoonella	1	Leekyejoonella	genus	Ok
Bacteria		Pseudomonadota	Gammaproteobacteria	Legionellales	Legionellaceae	Legionella	1	Legionella	genus	Ok
Bacteria		Actinomycetota	Actinomycetes	Micrococcales	Microbacteriaceae	Leifsonia	1	Leifsonia	genus	Ok
Bacteria		Pseudomonadota	Alphaproteobacteria	Rhodobacterales	Roseobacteraceae	Leisingera	1	Leisingera	genus	Ok
Bacteria		Pseudomonadota	Gammaproteobacteria	Enterobacterales	Enterobacteriaceae	Lelliottia	1	Lelliottia	genus	Ok
Bacteria		Bacillota	Bacilli	Bacillales	Bacillaceae	Lentibacillus	1	Lentibacillus	genus	Ok
Bacteria		Bacteroidota	Bacteroidia	Bacteroidales	Lentimicrobiaceae	Lentimicrobium	1	Lentimicrobium	genus	Ok
Bacteria		Chloroflexota	Anaerolineae	Anaerolineales	Anaerolineaceae	Leptolinea	1	Leptolinea	genus	Ok
Bacteria		Cyanobacteriota	Cyanophyceae	Pseudanabaenales	Leptolyngbyaceae	Leptolyngbya	1	Leptolyngbya	genus	Ok
Bacteria		Spirochaetota	Spirochaetia	Leptospirales	Leptospiraceae	Leptospira	1	Leptospira	genus	Ok
Bacteria		Nitrospirota	Nitrospiria	Nitrospirales	Nitrospiraceae	Leptospirillum	1	Leptospirillum	genus	Ok
Bacteria		Fusobacteriota	Fusobacteriia	Fusobacteriales	Leptotrichiaceae	Leptotrichia	1	Leptotrichia	genus	Ok
Bacteria		Actinomycetota	Actinomycetes	Micrococcales	Microbacteriaceae	Leucobacter	1	Leucobacter	genus	Ok
Bacteria		Bacillota	Bacilli	Lactobacillales	Lactobacillaceae	Leuconostoc	1	Leuconostoc	genus	Ok
Bacteria		Pseudomonadota	Gammaproteobacteria	Thiotrichales	Thiotrichaceae	Leucothrix	1	Leucothrix	genus	Ok
Bacteria		Bacillota	Bacilli	Lactobacillales	Lactobacillaceae	Levilactobacillus	1	Levilactobacillus	genus	Ok
Bacteria		Chloroflexota	Anaerolineae	Anaerolineales	Anaerolineaceae	Levilinea	1	Levilinea	genus	Ok
Bacteria		Bacillota	Clostridia	Eubacteriales		Levyella	1	Levyella	genus	Ok
Bacteria		Bacteroidota	Saprospiria	Saprospirales	Lewinellaceae	Lewinella	1	Lewinella	genus	Ok
Bacteria		Pseudomonadota	Alphaproteobacteria	Hyphomicrobiales	Rhizobiaceae	Liberibacter	1	Liberibacter	genus	Ok
Bacteria		Bacillota	Bacilli	Lactobacillales	Lactobacillaceae	Ligilactobacillus	1	Ligilactobacillus	genus	Ok
Bacteria		Planctomycetota	Planctomycetia	Pirellulales	Pirellulaceae	Lignipirellula	1	Lignipirellula	genus	Ok
Bacteria		Pseudomonadota	Alphaproteobacteria	Hyphomicrobiales	Rhodovibrionaceae	Limibacillus	1	Limibacillus	genus	Ok
Bacteria		Planctomycetota	Phycisphaerae	Sedimentisphaerales	Sedimentisphaeraceae	Limihaloglobus	1	Limihaloglobus	genus	Ok
Bacteria		Pseudomonadota	Alphaproteobacteria	Rhodobacterales	Paracoccaceae	Limimaricola	1	Limimaricola	genus	Ok
Bacteria		Deferribacterota	Deferribacteres	Deferribacterales	Geovibrionaceae	Limisalsivibrio	1	Limisalsivibrio	genus	Ok
Bacteria		Verrucomicrobiota	Verrucomicrobiae	Limisphaerales		Limisphaera	1	Limisphaera	genus	Ok
Bacteria		Pseudomonadota	Betaproteobacteria	Burkholderiales	Burkholderiaceae	Limnobacter	1	Limnobacter	genus	Ok
Bacteria		Bacillota	Limnochordia	Limnochordales	Limnochordaceae	Limnochorda	1	Limnochorda	genus	Ok
Bacteria		Planctomycetota	Planctomycetia	Gemmatales	Gemmataceae	Limnoglobus	1	Limnoglobus	genus	Ok
Bacteria		Pseudomonadota	Betaproteobacteria	Burkholderiales	Comamonadaceae	Limnohabitans	1	Limnohabitans	genus	Ok
Bacteria		Bacillota	Bacilli	Lactobacillales	Lactobacillaceae	Limosilactobacillus	1	Limosilactobacillus	genus	Ok
Bacteria		Bacillota	Bacilli	Bacillales	Listeriaceae	Listeria	1	Listeria	genus	Ok
Bacteria		Chloroflexota	Caldilineae	Caldilineales	Caldilineaceae	Litorilinea	1	Litorilinea	genus	Ok
Bacteria		Bacillota	Bacilli	Lactobacillales	Lactobacillaceae	Loigolactobacillus	1	Loigolactobacillus	genus	Ok
Bacteria		Pseudomonadota	Alphaproteobacteria	Rhodobacterales	Roseobacteraceae	Loktanella	1	Loktanella	genus	Ok
Bacteria		Chloroflexota	Anaerolineae	Anaerolineales	Anaerolineaceae	Longilinea	1	Longilinea	genus	Ok
Bacteria		Gemmatimonadota	Longimicrobiia	Longimicrobiales	Longimicrobiaceae	Longimicrobium	1	Longimicrobium	genus	Ok
Bacteria		Actinomycetota	Actinomycetes	Pseudonocardiales	Pseudonocardiaceae	Longimycelium	1	Longimycelium	genus	Ok
Bacteria			Deltaproteobacteria	Bradymonadales	Lujinxingiaceae	Lujinxingia	1	Lujinxingia	genus	Ok
Bacteria		Pseudomonadota	Gammaproteobacteria	Xanthomonadales	Rhodanobacteraceae	Luteibacter	1	Luteibacter	genus	Ok
Bacteria		Pseudomonadota	Gammaproteobacteria	Xanthomonadales	Xanthomonadaceae	Luteimonas	1	Luteimonas	genus	Ok
Bacteria		Acidobacteriota	Vicinamibacteria	Vicinamibacterales	Vicinamibacteraceae	Luteitalea	1	Luteitalea	genus	Ok
Bacteria		Bacteroidota	Flavobacteriia	Flavobacteriales	Flavobacteriaceae	Lutibacter	1	Lutibacter	genus	Ok
Bacteria		Pseudomonadota	Alphaproteobacteria	Hyphomicrobiales	Tepidamorphaceae	Lutibaculum	1	Lutibaculum	genus	Ok
Bacteria		Pseudomonadota	Alphaproteobacteria	Rhodobacterales	Roseobacteraceae	Lutimaribacter	1	Lutimaribacter	genus	Ok
Bacteria		Bacillota	Bacilli	Bacillales	Bacillaceae	Lysinibacillus	1	Lysinibacillus	genus	Ok
Bacteria		Pseudomonadota	Gammaproteobacteria	Xanthomonadales	Xanthomonadaceae	Lysobacter	1	Lysobacter	genus	Ok
Bacteria		Bacteroidota	Bacteroidia	Bacteroidales	Porphyromonadaceae	Macellibacteroides	1	Macellibacteroides	genus	Ok
Bacteria		Bacillota	Bacilli	Bacillales	Staphylococcaceae	Macrococcus	1	Macrococcus	genus	Ok
Bacteria		Pseudomonadota	Betaproteobacteria	Burkholderiales	Comamonadaceae	Macromonas	1	Macromonas	genus	Ok
Bacteria		Pseudomonadota	Alphaproteobacteria	Rhodospirillales	Rhodospirillaceae	Magnetospirillum	1	Magnetospirillum	genus	Ok
Bacteria		Pseudomonadota	Alphaproteobacteria	Rhodospirillales	Thalassospiraceae	Magnetovibrio	1	Magnetovibrio	genus	Ok
Bacteria		Bacillota	Clostridia	Thermoanaerobacterales	Thermoanaerobacterales Family IV. Incertae Sedis	Mahella	1	Mahella	genus	Ok
Bacteria		Thermodesulfobacteriota	Desulfovibrionia	Desulfovibrionales	Desulfovibrionaceae	Mailhella	1	Mailhella	genus	Ok
Bacteria		Bacillota	Clostridia	Eubacteriales	Clostridiaceae	Maledivibacter	1	Maledivibacter	genus	Ok
Bacteria		Pseudomonadota	Betaproteobacteria	Burkholderiales	Comamonadaceae	Malikia	1	Malikia	genus	Ok
Bacteria		Thermodesulfobacteriota	Desulfuromonadia	Desulfuromonadales	Geopsychrobacteraceae	Malonomonas	1	Malonomonas	genus	Ok
Bacteria		Pseudomonadota	Alphaproteobacteria	Rhodobacterales	Roseobacteraceae	Mameliella	1	Mameliella	genus	Ok
Bacteria		Bacillota	Bacilli	Bacillales	Staphylococcaceae	Mammaliicoccus	1	Mammaliicoccus	genus	Ok
Bacteria		Bacteroidota	Bacteroidia	Marinilabiliales	Prolixibacteraceae	Mangrovibacterium	1	Mangrovibacterium	genus	Ok
Bacteria		Pseudomonadota	Alphaproteobacteria	Rhodobacterales	Paracoccaceae	Mangrovicoccus	1	Mangrovicoccus	genus	Ok
Bacteria		Bacteroidota	Flavobacteriia	Flavobacteriales	Flavobacteriaceae	Mangrovimonas	1	Mangrovimonas	genus	Ok
Bacteria		Pseudomonadota	Gammaproteobacteria	Pseudomonadales	Marinobacteraceae	Mangrovitalea	1	Mangrovitalea	genus	Ok
Bacteria		Bacteroidota	Flavobacteriia	Flavobacteriales	Flavobacteriaceae	Maribacter	1	Maribacter	genus	Ok
Bacteria		Bacteroidota	Bacteroidia	Marinilabiliales	Prolixibacteraceae	Maribellus	1	Maribellus	genus	Ok
Bacteria		Pseudomonadota	Alphaproteobacteria	Maricaulales	Maricaulaceae	Maricaulis	1	Maricaulis	genus	Ok
Bacteria		Pseudomonadota	Gammaproteobacteria	Chromatiales	Chromatiaceae	Marichromatium	1	Marichromatium	genus	Ok
Bacteria		Thermodesulfobacteriota	Desulfovibrionia	Desulfovibrionales	Desulfovibrionaceae	Maridesulfovibrio	1	Maridesulfovibrio	genus	Ok
Bacteria		Pseudomonadota	Alphaproteobacteria	Rhodobacterales	Paracoccaceae	Marimonas	1	Marimonas	genus	Ok
Bacteria		Pseudomonadota	Alphaproteobacteria	Rhodobacterales	Paracoccaceae	Marinibacterium	1	Marinibacterium	genus	Ok
Bacteria		Pseudomonadota	Alphaproteobacteria	Maricaulales	Maricaulaceae	Marinicauda	1	Marinicauda	genus	Ok
Bacteria		Pseudomonadota	Alphaproteobacteria	Parvularculales	Parvularculaceae	Marinicaulis	1	Marinicaulis	genus	Ok
Bacteria		Bacteroidota	Flavobacteriia	Flavobacteriales	Flavobacteriaceae	Mariniflexile	1	Mariniflexile	genus	Ok
Bacteria		Bacteroidota	Bacteroidia	Marinilabiliales	Marinilabiliaceae	Marinilabilia	1	Marinilabilia	genus	Ok
Bacteria		Pseudomonadota	Gammaproteobacteria	Cellvibrionales	Cellvibrionaceae	Marinimicrobium	1	Marinimicrobium	genus	Ok
Bacteria		Bacteroidota	Bacteroidia	Marinilabiliales	Prolixibacteraceae	Mariniphaga	1	Mariniphaga	genus	Ok
Bacteria		Bacteroidota	Cytophagia	Cytophagales	Cyclobacteriaceae	Mariniradius	1	Mariniradius	genus	Ok
Bacteria		Deinococcota	Deinococci	Thermales	Thermaceae	Marinithermus	1	Marinithermus	genus	Ok
Bacteria		Thermotogota	Thermotogae	Petrotogales	Petrotogaceae	Marinitoga	1	Marinitoga	genus	Ok
Bacteria		Pseudomonadota	Gammaproteobacteria	Pseudomonadales	Marinobacteraceae	Marinobacter	1	Marinobacter	genus	Ok
Bacteria		Pseudomonadota	Gammaproteobacteria	Oceanospirillales	Oceanospirillaceae	Marinobacterium	1	Marinobacterium	genus	Ok
Bacteria		Bacillota	Bacilli	Bacillales	Bacillaceae	Marinococcus	1	Marinococcus	genus	Ok
Bacteria		Pseudomonadota	Gammaproteobacteria	Oceanospirillales	Oceanospirillaceae	Marinomonas	1	Marinomonas	genus	Ok
Bacteria		Pseudomonadota	Gammaproteobacteria	Oceanospirillales	Oceanospirillaceae	Marinospirillum	1	Marinospirillum	genus	Ok
Bacteria		Pseudomonadota	Alphaproteobacteria	Rhodobacterales	Paracoccaceae	Marinosulfonomonas	1	Marinosulfonomonas	genus	Ok
Bacteria		Pseudomonadota	Alphaproteobacteria	Rhodobacterales	Roseobacteraceae	Marinovum	1	Marinovum	genus	Ok
Bacteria		Pseudomonadota	Zetaproteobacteria	Mariprofundales	Mariprofundaceae	Mariprofundus	1	Mariprofundus	genus	Ok
Bacteria		Spirochaetota	Spirochaetia	Spirochaetales	Spirochaetaceae	Marispirochaeta	1	Marispirochaeta	genus	Ok
Bacteria		Pseudomonadota	Alphaproteobacteria	Rhodobacterales	Roseobacteraceae	Maritimibacter	1	Maritimibacter	genus	Ok
Bacteria		Pseudomonadota	Alphaproteobacteria	Rhodospirillales	Rhodospirillaceae	Marivibrio	1	Marivibrio	genus	Ok
Bacteria		Pseudomonadota	Alphaproteobacteria	Rhodobacterales	Roseobacteraceae	Marivita	1	Marivita	genus	Ok
Bacteria		Pseudomonadota	Alphaproteobacteria	Rhodobacterales	Paracoccaceae	Marivivens	1	Marivivens	genus	Ok
Bacteria		Actinomycetota	Actinomycetes	Propionibacteriales	Nocardioidaceae	Marmoricola	1	Marmoricola	genus	Ok
Bacteria		Pseudomonadota	Alphaproteobacteria	Hyphomicrobiales	Aurantimonadaceae	Martelella	1	Martelella	genus	Ok
Bacteria		Pseudomonadota	Betaproteobacteria	Burkholderiales	Oxalobacteraceae	Massilia	1	Massilia	genus	Ok
Bacteria		Bacteroidota	Bacteroidia	Bacteroidales	Porphyromonadaceae	Massilibacteroides	1	Massilibacteroides	genus	Ok
Bacteria		Bacillota	Erysipelotrichia	Erysipelotrichales	Erysipelotrichaceae	Massilicoli	1	Massilicoli	genus	Ok
Bacteria		Bacillota	Clostridia	Eubacteriales	Lachnospiraceae	Mediterraneibacter	1	Mediterraneibacter	genus	Ok
Bacteria		Bacillota	Negativicutes	Selenomonadales	Selenomonadaceae	Megamonas	1	Megamonas	genus	Ok
Bacteria		Bacillota	Negativicutes	Veillonellales	Veillonellaceae	Megasphaera	1	Megasphaera	genus	Ok
Bacteria		Pseudomonadota	Alphaproteobacteria	Rhodobacterales	Paracoccaceae	Meinhardsimonia	1	Meinhardsimonia	genus	Ok
Bacteria		Deinococcota	Deinococci	Thermales	Thermaceae	Meiothermus	1	Meiothermus	genus	Ok
Bacteria		Pseudomonadota	Betaproteobacteria	Burkholderiales	Comamonadaceae	Melaminivora	1	Melaminivora	genus	Ok
Bacteria		Ignavibacteriota	Ignavibacteria	Ignavibacteriales	Melioribacteraceae	Melioribacter	1	Melioribacter	genus	Ok
Bacteria		Bacillota	Erysipelotrichia	Erysipelotrichales	Erysipelotrichaceae	Merdibacter	1	Merdibacter	genus	Ok
Bacteria		Thermotogota	Thermotogae	Mesoaciditogales	Mesoaciditogaceae	Mesoaciditoga	1	Mesoaciditoga	genus	Ok
Bacteria		Bacillota	Bacilli	Bacillales	Bacillaceae	Mesobacillus	1	Mesobacillus	genus	Ok
Bacteria		Pseudomonadota	Alphaproteobacteria	Rhodobacterales	Roseobacteraceae	Mesobacterium	1	Mesobacterium	genus	Ok
Bacteria		Pseudomonadota	Alphaproteobacteria	Rhodobacterales	Roseobacteraceae	Mesobaculum	1	Mesobaculum	genus	Ok
Bacteria		Pseudomonadota	Alphaproteobacteria	Hyphomicrobiales	Phyllobacteriaceae	Mesorhizobium	1	Mesorhizobium	genus	Ok
Bacteria		Pseudomonadota	Betaproteobacteria	Burkholderiales	Sutterellaceae	Mesosutterella	1	Mesosutterella	genus	Ok
Bacteria		Thermotogota	Thermotogae	Kosmotogales	Kosmotogaceae	Mesotoga	1	Mesotoga	genus	Ok
Archaea		Euryarchaeota	Methanobacteria	Methanobacteriales	Methanobacteriaceae	Methanobacterium	1	Methanobacterium	genus	Ok
Archaea		Euryarchaeota	Methanobacteria	Methanobacteriales	Methanobacteriaceae	Methanobrevibacter	1	Methanobrevibacter	genus	Ok
Archaea		Euryarchaeota	Methanomicrobia	Methanomicrobiales	Methanocalculaceae	Methanocalculus	1	Methanocalculus	genus	Ok
Archaea		Euryarchaeota	Methanococci	Methanococcales	Methanocaldococcaceae	Methanocaldococcus	1	Methanocaldococcus	genus	Ok
Archaea		Euryarchaeota	Methanomicrobia	Methanocellales	Methanocellaceae	Methanocella	1	Methanocella	genus	Ok
Archaea		Euryarchaeota	Methanomicrobia	Methanosarcinales	Methanosarcinaceae	Methanococcoides	1	Methanococcoides	genus	Ok
Archaea		Euryarchaeota	Methanococci	Methanococcales	Methanococcaceae	Methanococcus	1	Methanococcus	genus	Ok
Archaea		Euryarchaeota	Methanomicrobia	Methanomicrobiales	Methanocorpusculaceae	Methanocorpusculum	1	Methanocorpusculum	genus	Ok
Archaea		Euryarchaeota	Methanomicrobia	Methanomicrobiales	Methanomicrobiaceae	Methanoculleus	1	Methanoculleus	genus	Ok
Archaea		Euryarchaeota	Methanococci	Methanococcales		Methanofervidicoccus	1	Methanofervidicoccus	genus	Ok
Archaea		Euryarchaeota	Methanomicrobia	Methanomicrobiales	Methanomicrobiaceae	Methanofollis	1	Methanofollis	genus	Ok
Archaea		Euryarchaeota	Methanomicrobia	Methanomicrobiales	Methanomicrobiaceae	Methanogenium	1	Methanogenium	genus	Ok
Archaea		Euryarchaeota	Methanomicrobia	Methanosarcinales	Methanosarcinaceae	Methanohalophilus	1	Methanohalophilus	genus	Ok
Archaea		Euryarchaeota	Methanomicrobia	Methanomicrobiales	Methanomicrobiaceae	Methanolacinia	1	Methanolacinia	genus	Ok
Archaea		Euryarchaeota	Methanomicrobia	Methanomicrobiales	Methanoregulaceae	Methanolinea	1	Methanolinea	genus	Ok
Archaea		Euryarchaeota	Methanomicrobia	Methanosarcinales	Methanosarcinaceae	Methanolobus	1	Methanolobus	genus	Ok
Archaea		Candidatus Thermoplasmatota	Thermoplasmata	Methanomassiliicoccales	Methanomassiliicoccaceae	Methanomassiliicoccus	1	Methanomassiliicoccus	genus	Ok
Archaea		Euryarchaeota	Methanomicrobia	Methanosarcinales	Methanosarcinaceae	Methanomethylovorans	1	Methanomethylovorans	genus	Ok
Archaea		Euryarchaeota	Methanomicrobia	Methanomicrobiales	Methanomicrobiaceae	Methanomicrobium	1	Methanomicrobium	genus	Ok
Archaea		Euryarchaeota	Methanomicrobia	Methanomicrobiales	Methanomicrobiaceae	Methanoplanus	1	Methanoplanus	genus	Ok
Archaea		Euryarchaeota	Methanomicrobia	Methanomicrobiales	Methanoregulaceae	Methanoregula	1	Methanoregula	genus	Ok
Archaea		Euryarchaeota	Methanomicrobia	Methanosarcinales	Methanosarcinaceae	Methanosalsum	1	Methanosalsum	genus	Ok
Archaea		Euryarchaeota	Methanomicrobia	Methanosarcinales	Methanosarcinaceae	Methanosarcina	1	Methanosarcina	genus	Ok
Archaea		Euryarchaeota	Methanobacteria	Methanobacteriales	Methanobacteriaceae	Methanosphaera	1	Methanosphaera	genus	Ok
Archaea		Euryarchaeota	Methanomicrobia	Methanomicrobiales	Methanospirillaceae	Methanospirillum	1	Methanospirillum	genus	Ok
Archaea		Euryarchaeota	Methanobacteria	Methanobacteriales	Methanobacteriaceae	Methanothermobacter	1	Methanothermobacter	genus	Ok
Archaea		Euryarchaeota	Methanococci	Methanococcales	Methanococcaceae	Methanothermococcus	1	Methanothermococcus	genus	Ok
Archaea		Euryarchaeota	Methanobacteria	Methanobacteriales	Methanothermaceae	Methanothermus	1	Methanothermus	genus	Ok
Archaea		Euryarchaeota	Methanomicrobia	Methanotrichales	Methanotrichaceae	Methanothrix	1	Methanothrix	genus	Ok
Archaea		Euryarchaeota	Methanococci	Methanococcales	Methanocaldococcaceae	Methanotorris	1	Methanotorris	genus	Ok
Archaea		Euryarchaeota	Methanomicrobia	Methanosarcinales	Methermicoccaceae	Methermicoccus	1	Methermicoccus	genus	Ok
Bacteria		Verrucomicrobiota				Methylacidimicrobium	1	Methylacidimicrobium	genus	Ok
Bacteria		Verrucomicrobiota	Methylacidiphilae	Methylacidiphilales	Methylacidiphilaceae	Methylacidiphilum	1	Methylacidiphilum	genus	Ok
Bacteria		Pseudomonadota	Betaproteobacteria	Burkholderiales	Sphaerotilaceae	Methylibium	1	Methylibium	genus	Ok
Bacteria		Pseudomonadota	Betaproteobacteria	Nitrosomonadales	Methylophilaceae	Methylobacillus	1	Methylobacillus	genus	Ok
Bacteria		Pseudomonadota	Gammaproteobacteria	Methylococcales	Methylococcaceae	Methylobacter	1	Methylobacter	genus	Ok
Bacteria		Pseudomonadota	Alphaproteobacteria	Hyphomicrobiales	Methylobacteriaceae	Methylobacterium	1	Methylobacterium	genus	Ok
Bacteria		Pseudomonadota	Alphaproteobacteria	Hyphomicrobiales	Pleomorphomonadaceae	Methylobrevis	1	Methylobrevis	genus	Ok
Bacteria		Pseudomonadota	Gammaproteobacteria	Methylococcales	Methylococcaceae	Methylocaldum	1	Methylocaldum	genus	Ok
Bacteria		Pseudomonadota	Alphaproteobacteria	Hyphomicrobiales	Hyphomicrobiaceae	Methyloceanibacter	1	Methyloceanibacter	genus	Ok
Bacteria		Pseudomonadota	Gammaproteobacteria	Methylococcales	Methylococcaceae	Methylococcus	1	Methylococcus	genus	Ok
Bacteria		Pseudomonadota	Alphaproteobacteria	Hyphomicrobiales	Methylocystaceae	Methylocystis	1	Methylocystis	genus	Ok
Bacteria		Pseudomonadota	Gammaproteobacteria	Methylococcales	Methylococcaceae	Methyloglobulus	1	Methyloglobulus	genus	Ok
Bacteria		Pseudomonadota	Gammaproteobacteria	Methylococcales	Methylothermaceae	Methylohalobius	1	Methylohalobius	genus	Ok
Bacteria		Pseudomonadota	Alphaproteobacteria	Hyphomicrobiales	Hyphomicrobiaceae	Methyloligella	1	Methyloligella	genus	Ok
Bacteria		Pseudomonadota	Gammaproteobacteria	Methylococcales	Methylococcaceae	Methylomagnum	1	Methylomagnum	genus	Ok
Bacteria		Pseudomonadota	Gammaproteobacteria	Methylococcales	Methylococcaceae	Methylomicrobium	1	Methylomicrobium	genus	Ok
Bacteria		Pseudomonadota	Gammaproteobacteria	Methylococcales	Methylococcaceae	Methylomonas	1	Methylomonas	genus	Ok
Bacteria		Pseudomonadota	Gammaproteobacteria			Methylonatrum	1	Methylonatrum	genus	Ok
Bacteria		Pseudomonadota	Gammaproteobacteria	Thiotrichales	Piscirickettsiaceae	Methylophaga	1	Methylophaga	genus	Ok
Bacteria		Pseudomonadota	Betaproteobacteria	Nitrosomonadales	Methylophilaceae	Methylophilus	1	Methylophilus	genus	Ok
Bacteria		Pseudomonadota	Alphaproteobacteria	Hyphomicrobiales	Methylocystaceae	Methylopila	1	Methylopila	genus	Ok
Bacteria		Pseudomonadota	Gammaproteobacteria	Methylococcales	Methylococcaceae	Methyloprofundus	1	Methyloprofundus	genus	Ok
Bacteria		Pseudomonadota	Alphaproteobacteria	Hyphomicrobiales	Methylobacteriaceae	Methylorubrum	1	Methylorubrum	genus	Ok
Bacteria		Pseudomonadota	Betaproteobacteria	Nitrosomonadales	Methylophilaceae	Methylotenera	1	Methylotenera	genus	Ok
Bacteria		Pseudomonadota	Gammaproteobacteria	Methylococcales	Methylococcaceae	Methyloterricola	1	Methyloterricola	genus	Ok
Bacteria		Pseudomonadota	Betaproteobacteria	Nitrosomonadales	Sterolibacteriaceae	Methyloversatilis	1	Methyloversatilis	genus	Ok
Bacteria		Pseudomonadota	Alphaproteobacteria	Hyphomicrobiales	Beijerinckiaceae	Methylovirgula	1	Methylovirgula	genus	Ok
Bacteria		Pseudomonadota	Betaproteobacteria	Nitrosomonadales	Methylophilaceae	Methylovorus	1	Methylovorus	genus	Ok
Bacteria		Bdellovibrionota	Bdellovibrionia	Bdellovibrionales	Pseudobdellovibrionaceae	Micavibrio	1	Micavibrio	genus	Ok
Bacteria		Actinomycetota	Actinomycetes	Micrococcales	Microbacteriaceae	Microbacterium	1	Microbacterium	genus	Ok
Bacteria		Actinomycetota	Actinomycetes	Streptosporangiales	Streptosporangiaceae	Microbispora	1	Microbispora	genus	Ok
Bacteria		Pseudomonadota	Gammaproteobacteria	Cellvibrionales	Microbulbiferaceae	Microbulbifer	1	Microbulbifer	genus	Ok
Bacteria		Actinomycetota	Actinomycetes	Micrococcales	Microbacteriaceae	Microcella	1	Microcella	genus	Ok
Bacteria		Actinomycetota	Actinomycetes	Micrococcales	Micrococcaceae	Micrococcus	1	Micrococcus	genus	Ok
Bacteria		Cyanobacteriota	Cyanophyceae	Oscillatoriales	Microcoleaceae	Microcoleus	1	Microcoleus	genus	Ok
Bacteria		Cyanobacteriota	Cyanophyceae	Chroococcales	Microcystaceae	Microcystis	1	Microcystis	genus	Ok
Bacteria		Actinomycetota	Actinomycetes	Propionibacteriales	Propionibacteriaceae	Microlunatus	1	Microlunatus	genus	Ok
Bacteria		Actinomycetota	Actinomycetes	Micromonosporales	Micromonosporaceae	Micromonospora	1	Micromonospora	genus	Ok
Bacteria			Deltaproteobacteria	Bradymonadales	Microvenatoraceae	Microvenator	1	Microvenator	genus	Ok
Bacteria		Pseudomonadota	Alphaproteobacteria	Hyphomicrobiales	Methylobacteriaceae	Microvirga	1	Microvirga	genus	Ok
Bacteria		Bacteroidota	Bacteroidia	Bacteroidales	Rikenellaceae	Millionella	1	Millionella	genus	Ok
Bacteria		Pseudomonadota	Alphaproteobacteria	Minwuiales	Minwuiaceae	Minwuia	1	Minwuia	genus	Ok
Bacteria		Pseudomonadota	Betaproteobacteria	Burkholderiales	Sphaerotilaceae	Mitsuaria	1	Mitsuaria	genus	Ok
Bacteria		Actinomycetota	Actinomycetes	Actinomycetales	Actinomycetaceae	Mobiluncus	1	Mobiluncus	genus	Ok
Bacteria		Actinomycetota	Actinomycetes	Geodermatophilales	Geodermatophilaceae	Modestobacter	1	Modestobacter	genus	Ok
Bacteria		Bacillota	Clostridia	Eubacteriales	Eubacteriales Family XIII. Incertae Sedis	Mogibacterium	1	Mogibacterium	genus	Ok
Bacteria		Pseudomonadota	Alphaproteobacteria	Rhodobacterales	Paracoccaceae	Monaibacterium	1	Monaibacterium	genus	Ok
Bacteria		Pseudomonadota	Alphaproteobacteria	Hyphomicrobiales	Pleomorphomonadaceae	Mongoliimonas	1	Mongoliimonas	genus	Ok
Bacteria		Bacteroidota	Cytophagia	Cytophagales	Cyclobacteriaceae	Mongoliitalea	1	Mongoliitalea	genus	Ok
Bacteria		Bacillota	Clostridia	Moorellales	Moorellaceae	Moorella	1	Moorella	genus	Ok
Bacteria		Cyanobacteriota	Cyanophyceae	Oscillatoriales	Oscillatoriaceae	Moorena	1	Moorena	genus	Ok
Bacteria		Pseudomonadota	Gammaproteobacteria	Moraxellales	Moraxellaceae	Moraxella	1	Moraxella	genus	Ok
Bacteria						Morganella	1	Morganella	genus	Ok
Bacteria		Pseudomonadota	Gammaproteobacteria	Oceanospirillales	Oceanospirillaceae	Motiliproteus	1	Motiliproteus	genus	Ok
Bacteria		Bacteroidota	Sphingobacteriia	Sphingobacteriales	Sphingobacteriaceae	Mucilaginibacter	1	Mucilaginibacter	genus	Ok
Bacteria		Deferribacterota	Deferribacteres	Deferribacterales	Mucispirillaceae	Mucispirillum	1	Mucispirillum	genus	Ok
Bacteria		Actinomycetota	Actinomycetes	Propionibacteriales	Nocardioidaceae	Mumia	1	Mumia	genus	Ok
Bacteria		Bacteroidota	Bacteroidia	Bacteroidales	Muribaculaceae	Muribaculum	1	Muribaculum	genus	Ok
Bacteria		Bacteroidota	Flavobacteriia	Flavobacteriales	Flavobacteriaceae	Muricauda	1	Muricauda	genus	Ok
Bacteria		Pseudomonadota	Alphaproteobacteria	Rhodobacterales	Roseobacteraceae	Muriiphilus	1	Muriiphilus	genus	Ok
Bacteria		Actinomycetota	Actinomycetes	Micrococcales	Promicromonosporaceae	Myceligenerans	1	Myceligenerans	genus	Ok
Bacteria		Actinomycetota	Actinomycetes	Mycobacteriales	Mycobacteriaceae	Mycobacterium	1	Mycobacterium	genus	Ok
Bacteria		Actinomycetota	Actinomycetes	Mycobacteriales	Mycobacteriaceae	Mycobacteroides	1	Mycobacteroides	genus	Ok
Bacteria		Actinomycetota	Actinomycetes	Mycobacteriales	Mycobacteriaceae	Mycolicibacterium	1	Mycolicibacterium	genus	Ok
Bacteria		Mycoplasmatota	Mollicutes	Mycoplasmatales	Mycoplasmataceae	Mycoplasmopsis	1	Mycoplasmopsis	genus	Ok
Bacteria		Bacteroidota	Flavobacteriia	Flavobacteriales	Flavobacteriaceae	Myroides	1	Myroides	genus	Ok
Bacteria		Myxococcota	Myxococcia	Myxococcales	Myxococcaceae	Myxococcus	1	Myxococcus	genus	Ok
Bacteria		Cyanobacteriota	Cyanophyceae	Pleurocapsales	Hyellaceae	Myxosarcina	1	Myxosarcina	genus	Ok
Bacteria		Actinomycetota	Actinomycetes	Micrococcales	Microbacteriaceae	Naasia	1	Naasia	genus	Ok
Bacteria		Actinomycetota	Actinomycetes	Nakamurellales	Nakamurellaceae	Nakamurella	1	Nakamurella	genus	Ok
Bacteria		Bacillota	Clostridia	Natranaerobiales	Natranaerobiaceae	Natranaerobius	1	Natranaerobius	genus	Ok
Bacteria		Bacillota	Clostridia	Halanaerobiales	Halobacteroidaceae	Natroniella	1	Natroniella	genus	Ok
Bacteria		Bacillota	Clostridia	Eubacteriales	Clostridiaceae	Natronincola	1	Natronincola	genus	Ok
Bacteria		Pseudomonadota	Alphaproteobacteria	Rhodobacterales	Paracoccaceae	Natronohydrobacter	1	Natronohydrobacter	genus	Ok
Bacteria		Pseudomonadota	Gammaproteobacteria	Chromatiales	Ectothiorhodospiraceae	Natronospira	1	Natronospira	genus	Ok
Bacteria		Actinomycetota	Actinomycetes	Propionibacteriales	Propionibacteriaceae	Naumannella	1	Naumannella	genus	Ok
Bacteria		Campylobacterota	Epsilonproteobacteria	Nautiliales	Nautiliaceae	Nautilia	1	Nautilia	genus	Ok
Bacteria		Bacillota				Negativibacillus	1	Negativibacillus	genus	Ok
Bacteria		Pseudomonadota	Betaproteobacteria	Neisseriales	Neisseriaceae	Neisseria	1	Neisseria	genus	Ok
Bacteria		Bacillota	Bacilli	Bacillales	Bacillaceae	Neobacillus	1	Neobacillus	genus	Ok
Bacteria		Chlamydiota	Chlamydiia	Parachlamydiales	Parachlamydiaceae	Neochlamydia	1	Neochlamydia	genus	Ok
Bacteria		Pseudomonadota	Alphaproteobacteria	Rhodobacterales	Neomegalonemataceae	Neomegalonema	1	Neomegalonema	genus	Ok
Bacteria		Actinomycetota	Actinomycetes	Micrococcales	Micrococcaceae	Neomicrococcus	1	Neomicrococcus	genus	Ok
Bacteria		Pseudomonadota	Alphaproteobacteria	Hyphomicrobiales	Rhizobiaceae	Neorhizobium	1	Neorhizobium	genus	Ok
Bacteria		Pseudomonadota	Alphaproteobacteria	Rhodobacterales	Paracoccaceae	Neotabrizicola	1	Neotabrizicola	genus	Ok
Bacteria		Pseudomonadota	Alphaproteobacteria	Rhodobacterales	Paracoccaceae	Neptunicoccus	1	Neptunicoccus	genus	Ok
Bacteria		Pseudomonadota	Gammaproteobacteria	Oceanospirillales	Oceanospirillaceae	Neptuniibacter	1	Neptuniibacter	genus	Ok
Bacteria		Pseudomonadota	Gammaproteobacteria	Oceanospirillales	Oceanospirillaceae	Neptunomonas	1	Neptunomonas	genus	Ok
Bacteria		Actinomycetota	Actinomycetes	Micrococcales	Micrococcaceae	Nesterenkonia	1	Nesterenkonia	genus	Ok
Bacteria		Pseudomonadota	Gammaproteobacteria	Nevskiales	Sinobacteraceae	Nevskia	1	Nevskia	genus	Ok
Bacteria		Bacteroidota	Chitinophagia	Chitinophagales	Chitinophagaceae	Niabella	1	Niabella	genus	Ok
Bacteria		Bacillota	Bacilli	Bacillales	Bacillaceae	Niallia	1	Niallia	genus	Ok
Bacteria		Bacteroidota	Chitinophagia	Chitinophagales	Chitinophagaceae	Niastella	1	Niastella	genus	Ok
Bacteria		Pseudomonadota	Alphaproteobacteria	Rhodobacterales	Paracoccaceae	Nioella	1	Nioella	genus	Ok
Bacteria		Pseudomonadota	Alphaproteobacteria	Rhodospirillales	Thalassobaculaceae	Nisaea	1	Nisaea	genus	Ok
Bacteria		Pseudomonadota	Alphaproteobacteria	Hyphomicrobiales	Phyllobacteriaceae	Nitratireductor	1	Nitratireductor	genus	Ok
Bacteria		Campylobacterota	Epsilonproteobacteria	Nautiliales	Nitratiruptoraceae	Nitratiruptor	1	Nitratiruptor	genus	Ok
Bacteria		Actinomycetota	Nitriliruptoria	Nitriliruptorales	Nitriliruptoraceae	Nitriliruptor	1	Nitriliruptor	genus	Ok
Bacteria		Pseudomonadota	Gammaproteobacteria	Oceanospirillales	Oceanospirillaceae	Nitrincola	1	Nitrincola	genus	Ok
Bacteria		Pseudomonadota	Alphaproteobacteria	Hyphomicrobiales	Nitrobacteraceae	Nitrobacter	1	Nitrobacter	genus	Ok
Bacteria		Pseudomonadota	Gammaproteobacteria	Chromatiales	Ectothiorhodospiraceae	Nitrococcus	1	Nitrococcus	genus	Ok
Bacteria		Pseudomonadota	Gammaproteobacteria	Chromatiales	Chromatiaceae	Nitrosococcus	1	Nitrosococcus	genus	Ok
Bacteria		Pseudomonadota	Betaproteobacteria	Nitrosomonadales	Nitrosomonadaceae	Nitrosomonas	1	Nitrosomonas	genus	Ok
Archaea		Nitrososphaerota	Nitrososphaeria	Nitrososphaerales	Nitrososphaeraceae	Nitrososphaera	1	Nitrososphaera	genus	Ok
Bacteria		Pseudomonadota	Betaproteobacteria	Nitrosomonadales	Nitrosomonadaceae	Nitrosospira	1	Nitrosospira	genus	Ok
Bacteria		Nitrospinota	Nitrospinia	Nitrospinales	Nitrospinaceae	Nitrospina	1	Nitrospina	genus	Ok
Bacteria						Nitrospira	1	Nitrospira	class	Ok
Bacteria		Pseudomonadota	Alphaproteobacteria	Rhodospirillales	Azospirillaceae	Nitrospirillum	1	Nitrospirillum	genus	Ok
Bacteria		Actinomycetota	Actinomycetes	Mycobacteriales	Nocardiaceae	Nocardia	1	Nocardia	genus	Ok
Bacteria		Actinomycetota	Actinomycetes	Propionibacteriales	Nocardioidaceae	Nocardioides	1	Nocardioides	genus	Ok
Bacteria		Actinomycetota	Actinomycetes	Streptosporangiales	Nocardiopsaceae	Nocardiopsis	1	Nocardiopsis	genus	Ok
Bacteria		Cyanobacteriota	Cyanophyceae	Nodosilineales	Nodosilineaceae	Nodosilinea	1	Nodosilinea	genus	Ok
Bacteria						Nodularia	1	Nodularia	genus	Ok
Bacteria		Bacteroidota	Flavobacteriia	Flavobacteriales	Flavobacteriaceae	Nonlabens	1	Nonlabens	genus	Ok
Bacteria		Actinomycetota	Actinomycetes	Streptosporangiales	Streptosporangiaceae	Nonomuraea	1	Nonomuraea	genus	Ok
Bacteria		Cyanobacteriota	Cyanophyceae	Nostocales	Nostocaceae	Nostoc	1	Nostoc	genus	Ok
Bacteria		Pseudomonadota	Alphaproteobacteria	Hyphomicrobiales	Notoacmeibacteraceae	Notoacmeibacter	1	Notoacmeibacter	genus	Ok
Bacteria		Bacillota	Bacilli	Bacillales	Thermoactinomycetaceae	Novibacillus	1	Novibacillus	genus	Ok
Bacteria		Pseudomonadota	Betaproteobacteria	Burkholderiales	Oxalobacteraceae	Noviherbaspirillum	1	Noviherbaspirillum	genus	Ok
Bacteria		Planctomycetota	Planctomycetia	Pirellulales	Pirellulaceae	Novipirellula	1	Novipirellula	genus	Ok
Bacteria		Pseudomonadota	Alphaproteobacteria	Rhodospirillales	Rhodospirillaceae	Novispirillum	1	Novispirillum	genus	Ok
Bacteria		Pseudomonadota	Alphaproteobacteria	Sphingomonadales	Sphingomonadaceae	Novosphingobium	1	Novosphingobium	genus	Ok
Bacteria		Acidobacteriota	Terriglobia	Terriglobales	Acidobacteriaceae	Occallatibacter	1	Occallatibacter	genus	Ok
Bacteria		Actinomycetota	Actinomycetes	Micrococcales	Ruaniaceae	Occultella	1	Occultella	genus	Ok
Bacteria		Pseudomonadota	Alphaproteobacteria	Sneathiellales	Sneathiellaceae	Oceanibacterium	1	Oceanibacterium	genus	Ok
Bacteria		Pseudomonadota	Alphaproteobacteria	Rhodospirillales	Thalassobaculaceae	Oceanibaculum	1	Oceanibaculum	genus	Ok
Bacteria		Pseudomonadota	Alphaproteobacteria	Rhodobacterales	Paracoccaceae	Oceanibium	1	Oceanibium	genus	Ok
Bacteria		Pseudomonadota	Alphaproteobacteria	Maricaulales	Maricaulaceae	Oceanicaulis	1	Oceanicaulis	genus	Ok
Bacteria		Pseudomonadota	Alphaproteobacteria	Rhodobacterales	Paracoccaceae	Oceanicella	1	Oceanicella	genus	Ok
Bacteria		Pseudomonadota	Alphaproteobacteria	Rhodobacterales	Roseobacteraceae	Oceanicola	1	Oceanicola	genus	Ok
Bacteria		Thermodesulfobacteriota	Desulfovibrionia	Desulfovibrionales	Desulfovibrionaceae	Oceanidesulfovibrio	1	Oceanidesulfovibrio	genus	Ok
Bacteria		Pseudomonadota	Alphaproteobacteria	Rhodobacterales	Paracoccaceae	Oceaniglobus	1	Oceaniglobus	genus	Ok
Bacteria		Pseudomonadota	Alphaproteobacteria	Rhodobacterales	Roseobacteraceae	Oceaniovalibus	1	Oceaniovalibus	genus	Ok
Bacteria		Pseudomonadota	Alphaproteobacteria	Hyphomicrobiales	Phyllobacteriaceae	Oceaniradius	1	Oceaniradius	genus	Ok
Bacteria		Pseudomonadota	Gammaproteobacteria	Aeromonadales	Aeromonadaceae	Oceanisphaera	1	Oceanisphaera	genus	Ok
Bacteria		Spirochaetota	Spirochaetia	Spirochaetales	Spirochaetaceae	Oceanispirochaeta	1	Oceanispirochaeta	genus	Ok
Bacteria		Deinococcota	Deinococci	Thermales	Thermaceae	Oceanithermus	1	Oceanithermus	genus	Ok
Bacteria		Bacillota	Bacilli	Bacillales	Bacillaceae	Oceanobacillus	1	Oceanobacillus	genus	Ok
Bacteria		Thermotogota	Thermotogae	Petrotogales	Petrotogaceae	Oceanotoga	1	Oceanotoga	genus	Ok
Bacteria		Pseudomonadota	Alphaproteobacteria	Hyphomicrobiales	Brucellaceae	Ochrobactrum	1	Ochrobactrum	genus	Ok
Bacteria		Pseudomonadota	Alphaproteobacteria	Rhodobacterales	Roseobacteraceae	Octadecabacter	1	Octadecabacter	genus	Ok
Bacteria		Bacteroidota	Bacteroidia	Bacteroidales	Odoribacteraceae	Odoribacter	1	Odoribacter	genus	Ok
Bacteria		Cyanobacteriota	Cyanophyceae	Oscillatoriales	Oscillatoriaceae	Okeania	1	Okeania	genus	Ok
Bacteria		Pseudomonadota	Gammaproteobacteria	Oceanospirillales	Oceanospirillaceae	Oleibacter	1	Oleibacter	genus	Ok
Bacteria		Thermodesulfobacteriota	Desulfovibrionia	Desulfovibrionales	Desulfovibrionaceae	Oleidesulfovibrio	1	Oleidesulfovibrio	genus	Ok
Bacteria		Verrucomicrobiota	Opitutae	Opitutales	Opitutaceae	Oleiharenicola	1	Oleiharenicola	genus	Ok
Bacteria		Pseudomonadota	Gammaproteobacteria	Oceanospirillales	Oceanospirillaceae	Oleispira	1	Oleispira	genus	Ok
Bacteria		Pseudomonadota	Alphaproteobacteria	Rhodospirillales	Acetobacteraceae	Oleomonas	1	Oleomonas	genus	Ok
Bacteria		Pseudomonadota	Betaproteobacteria	Burkholderiales	Alcaligenaceae	Oligella	1	Oligella	genus	Ok
Bacteria		Bacteroidota	Sphingobacteriia	Sphingobacteriales	Sphingobacteriaceae	Olivibacter	1	Olivibacter	genus	Ok
Bacteria		Actinomycetota	Coriobacteriia	Coriobacteriales	Atopobiaceae	Olsenella	1	Olsenella	genus	Ok
Bacteria		Bacillota	Clostridia	Halanaerobiales	Halobacteroidaceae	Orenia	1	Orenia	genus	Ok
Bacteria		Bacillota	Clostridia	Eubacteriales	Lachnospiraceae	Oribacterium	1	Oribacterium	genus	Ok
Bacteria		Pseudomonadota	Alphaproteobacteria	Hyphomicrobiales	Phyllobacteriaceae	Oricola	1	Oricola	genus	Ok
Bacteria		Chloroflexota	Anaerolineae	Anaerolineales	Anaerolineaceae	Ornatilinea	1	Ornatilinea	genus	Ok
Bacteria		Actinomycetota	Actinomycetes	Micrococcales	Ornithinimicrobiaceae	Ornithinimicrobium	1	Ornithinimicrobium	genus	Ok
Bacteria		Pseudomonadota	Betaproteobacteria	Burkholderiales	Alcaligenaceae	Orrella	1	Orrella	genus	Ok
Bacteria		Thermodesulfobacteriota	Desulfuromonadia	Geobacterales	Geobacteraceae	Oryzomonas	1	Oryzomonas	genus	Ok
Bacteria		Bacillota	Clostridia	Eubacteriales	Oscillospiraceae	Oscillibacter	1	Oscillibacter	genus	Ok
Bacteria		Pseudomonadota	Betaproteobacteria	Burkholderiales	Comamonadaceae	Ottowia	1	Ottowia	genus	Ok
Bacteria		Pseudomonadota	Betaproteobacteria	Burkholderiales	Oxalobacteraceae	Oxalicibacterium	1	Oxalicibacterium	genus	Ok
Bacteria		Pseudomonadota	Betaproteobacteria	Burkholderiales	Oxalobacteraceae	Oxalobacter	1	Oxalobacter	genus	Ok
Bacteria		Pseudomonadota	Alphaproteobacteria	Rhodobacterales	Roseobacteraceae	Pacificibacter	1	Pacificibacter	genus	Ok
Bacteria		Pseudomonadota	Alphaproteobacteria	Sphingomonadales	Sphingosinicellaceae	Pacificimonas	1	Pacificimonas	genus	Ok
Bacteria		Pseudomonadota	Alphaproteobacteria	Rhodospirillales	Rhodospirillaceae	Pacificispira	1	Pacificispira	genus	Ok
Bacteria		Pseudomonadota	Alphaproteobacteria	Rhodobacterales	Paracoccaceae	Pacificitalea	1	Pacificitalea	genus	Ok
Bacteria		Pseudomonadota	Betaproteobacteria	Burkholderiales	Alcaligenaceae	Paenalcaligenes	1	Paenalcaligenes	genus	Ok
Bacteria		Bacillota	Bacilli	Bacillales	Paenibacillaceae	Paenibacillus	1	Paenibacillus	genus	Ok
Bacteria		Actinomycetota	Actinomycetes	Micrococcales	Micrococcaceae	Paeniglutamicibacter	1	Paeniglutamicibacter	genus	Ok
Archaea		Euryarchaeota	Thermococci	Thermococcales	Thermococcaceae	Palaeococcus	1	Palaeococcus	genus	Ok
Bacteria		Pseudomonadota	Alphaproteobacteria	Rhodobacterales	Roseobacteraceae	Palleronia	1	Palleronia	genus	Ok
Bacteria		Bacteroidota	Bacteroidia	Bacteroidales	Paludibacteraceae	Paludibacter	1	Paludibacter	genus	Ok
Bacteria		Pseudomonadota	Gammaproteobacteria	Nevskiales	Sinobacteraceae	Panacagrimonas	1	Panacagrimonas	genus	Ok
Bacteria		Bacteroidota	Chitinophagia	Chitinophagales	Chitinophagaceae	Panacibacter	1	Panacibacter	genus	Ok
Bacteria		Pseudomonadota	Betaproteobacteria	Burkholderiales	Burkholderiaceae	Pandoraea	1	Pandoraea	genus	Ok
Bacteria		Pseudomonadota	Alphaproteobacteria	Hyphomicrobiales	Stappiaceae	Pannonibacter	1	Pannonibacter	genus	Ok
Bacteria		Pseudomonadota	Gammaproteobacteria	Enterobacterales	Erwiniaceae	Pantoea	1	Pantoea	genus	Ok
Bacteria		Bacillota	Clostridia	Eubacteriales	Oscillospiraceae	Papillibacter	1	Papillibacter	genus	Ok
Bacteria		Bacteroidota	Bacteroidia	Bacteroidales	Tannerellaceae	Parabacteroides	1	Parabacteroides	genus	Ok
Bacteria		Pseudomonadota	Betaproteobacteria	Burkholderiales	Burkholderiaceae	Paraburkholderia	1	Paraburkholderia	genus	Ok
Bacteria		Chlamydiota	Chlamydiia	Parachlamydiales	Parachlamydiaceae	Parachlamydia	1	Parachlamydia	genus	Ok
Bacteria		Bacteroidota	Chitinophagia	Chitinophagales	Chitinophagaceae	Paracnuella	1	Paracnuella	genus	Ok
Bacteria						Paracoccus	1	Paracoccus	genus	Ok
Bacteria		Bacillota	Clostridia	Eubacteriales	Peptococcaceae	Paradesulfitobacterium	1	Paradesulfitobacterium	genus	Ok
Bacteria		Pseudomonadota	Gammaproteobacteria	Alteromonadales	Ferrimonadaceae	Paraferrimonas	1	Paraferrimonas	genus	Ok
Bacteria		Bacillota	Bacilli	Bacillales	Bacillaceae	Parageobacillus	1	Parageobacillus	genus	Ok
Bacteria		Pseudomonadota	Gammaproteobacteria	Cellvibrionales	Halieaceae	Parahaliea	1	Parahaliea	genus	Ok
Bacteria		Bacillota	Clostridia	Eubacteriales	Clostridiaceae	Paramaledivibacter	1	Paramaledivibacter	genus	Ok
Bacteria		Pseudomonadota	Alphaproteobacteria	Hyphomicrobiales	Phyllobacteriaceae	Paramesorhizobium	1	Paramesorhizobium	genus	Ok
Bacteria		Bacteroidota	Sphingobacteriia	Sphingobacteriales	Sphingobacteriaceae	Parapedobacter	1	Parapedobacter	genus	Ok
Bacteria		Pseudomonadota	Gammaproteobacteria	Moraxellales	Moraxellaceae	Paraperlucidibaca	1	Paraperlucidibaca	genus	Ok
Bacteria		Pseudomonadota	Gammaproteobacteria	Chromatiales	Chromatiaceae	Pararheinheimera	1	Pararheinheimera	genus	Ok
Bacteria		Pseudomonadota	Alphaproteobacteria	Hyphomicrobiales	Rhizobiaceae	Pararhizobium	1	Pararhizobium	genus	Ok
Bacteria		Pseudomonadota	Alphaproteobacteria	Rhodobacterales	Paracoccaceae	Pararhodobacter	1	Pararhodobacter	genus	Ok
Bacteria		Pseudomonadota	Alphaproteobacteria	Rhodospirillales	Rhodospirillaceae	Pararhodospirillum	1	Pararhodospirillum	genus	Ok
Bacteria		Pseudomonadota	Alphaproteobacteria	Rhodospirillales	Acetobacteraceae	Parasaccharibacter	1	Parasaccharibacter	genus	Ok
Bacteria		Bacteroidota	Chitinophagia	Chitinophagales	Chitinophagaceae	Parasegetibacter	1	Parasegetibacter	genus	Ok
Bacteria		Pseudomonadota	Alphaproteobacteria	Sphingomonadales	Sphingomonadaceae	Parasphingopyxis	1	Parasphingopyxis	genus	Ok
Bacteria		Pseudomonadota	Alphaproteobacteria	Sphingomonadales	Sphingomonadaceae	Parasphingorhabdus	1	Parasphingorhabdus	genus	Ok
Bacteria		Actinomycetota	Actinomycetes	Propionibacteriales	Propionibacteriaceae	Parenemella	1	Parenemella	genus	Ok
Bacteria		Pseudomonadota	Alphaproteobacteria	Rhodobacterales	Paracoccaceae	Paroceanicella	1	Paroceanicella	genus	Ok
Bacteria		Pseudomonadota	Alphaproteobacteria	Hyphomicrobiales	Parvibaculaceae	Parvibaculum	1	Parvibaculum	genus	Ok
Bacteria		Pseudomonadota	Betaproteobacteria	Burkholderiales	Alcaligenaceae	Parvibium	1	Parvibium	genus	Ok
Bacteria		Pseudomonadota	Alphaproteobacteria	Parvularculales	Parvularculaceae	Parvularcula	1	Parvularcula	genus	Ok
Bacteria		Pseudomonadota	Gammaproteobacteria	Pasteurellales	Pasteurellaceae	Pasteurella	1	Pasteurella	genus	Ok
Bacteria		Actinomycetota	Thermoleophilia	Solirubrobacterales	Patulibacteraceae	Patulibacter	1	Patulibacter	genus	Ok
Bacteria		Pseudomonadota	Betaproteobacteria	Burkholderiales		Paucibacter	1	Paucibacter	genus	Ok
Bacteria		Thermodesulfobacteriota	Desulfovibrionia	Desulfovibrionales	Desulfovibrionaceae	Paucidesulfovibrio	1	Paucidesulfovibrio	genus	Ok
Bacteria		Pseudomonadota	Gammaproteobacteria	Enterobacterales	Pectobacteriaceae	Pectobacterium	1	Pectobacterium	genus	Ok
Bacteria		Bacillota	Bacilli	Lactobacillales	Lactobacillaceae	Pediococcus	1	Pediococcus	genus	Ok
Bacteria		Bacteroidota	Sphingobacteriia	Sphingobacteriales	Sphingobacteriaceae	Pedobacter	1	Pedobacter	genus	Ok
Bacteria		Verrucomicrobiota	Verrucomicrobiae	Limisphaerales		Pedosphaera	1	Pedosphaera	genus	Ok
Bacteria		Pseudomonadota	Alphaproteobacteria	Sphingomonadales	Erythrobacteraceae	Pelagerythrobacter	1	Pelagerythrobacter	genus	Ok
Bacteria		Pseudomonadota	Alphaproteobacteria	Rhodobacterales	Roseobacteraceae	Pelagibaca	1	Pelagibaca	genus	Ok
Bacteria		Pseudomonadota	Alphaproteobacteria	Hyphomicrobiales	Devosiaceae	Pelagibacterium	1	Pelagibacterium	genus	Ok
Bacteria		Pseudomonadota	Alphaproteobacteria	Hyphomicrobiales	Rhodovibrionaceae	Pelagibius	1	Pelagibius	genus	Ok
Bacteria		Verrucomicrobiota	Opitutae	Puniceicoccales	Pelagicoccaceae	Pelagicoccus	1	Pelagicoccus	genus	Ok
Bacteria		Pseudomonadota	Alphaproteobacteria	Rhodobacterales	Roseobacteraceae	Pelagicola	1	Pelagicola	genus	Ok
Bacteria		Pseudomonadota	Alphaproteobacteria	Rhodobacterales	Roseobacteraceae	Pelagimonas	1	Pelagimonas	genus	Ok
Bacteria		Pseudomonadota	Alphaproteobacteria	Rhodobacterales	Paracoccaceae	Pelagivirga	1	Pelagivirga	genus	Ok
Bacteria		Pseudomonadota	Alphaproteobacteria	Rhodobacterales	Paracoccaceae	Pelagovum	1	Pelagovum	genus	Ok
Bacteria		Thermodesulfobacteriota	Desulfuromonadia	Desulfuromonadales	Desulfuromonadaceae	Pelobacter	1	Pelobacter	genus	Ok
Bacteria		Chlorobiota	Chlorobiia	Chlorobiales	Chlorobiaceae	Pelodictyon	1	Pelodictyon	genus	Ok
Bacteria		Chloroflexota	Anaerolineae	Anaerolineales	Anaerolineaceae	Pelolinea	1	Pelolinea	genus	Ok
Bacteria		Pseudomonadota	Hydrogenophilia			Pelomicrobium	1	Pelomicrobium	genus	Ok
Bacteria		Pseudomonadota	Betaproteobacteria	Burkholderiales	Comamonadaceae	Pelomonas	1	Pelomonas	genus	Ok
Bacteria		Bacillota	Negativicutes	Selenomonadales	Sporomusaceae	Pelosinus	1	Pelosinus	genus	Ok
Bacteria		Bacillota	Clostridia	Eubacteriales	Desulfotomaculaceae	Pelotomaculum	1	Pelotomaculum	genus	Ok
Bacteria		Thermodesulfobacteriota	Desulfuromonadia	Geobacterales	Geobacteraceae	Pelovirga	1	Pelovirga	genus	Ok
Bacteria		Bacillota	Tissierellia	Tissierellales	Peptoniphilaceae	Peptoniphilus	1	Peptoniphilus	genus	Ok
Bacteria		Bacillota	Bacilli	Bacillales	Bacillaceae	Peribacillus	1	Peribacillus	genus	Ok
Bacteria		Pseudomonadota	Gammaproteobacteria	Pseudomonadales	Perlucidibacaceae	Perlucidibaca	1	Perlucidibaca	genus	Ok
Bacteria		Aquificota	Aquificae	Aquificales	Hydrogenothermaceae	Persephonella	1	Persephonella	genus	Ok
Bacteria			Deltaproteobacteria	Bradymonadales	Bradymonadaceae	Persicimonas	1	Persicimonas	genus	Ok
Bacteria		Bacteroidota	Bacteroidia	Bacteroidales	Dysgonomonadaceae	Petrimonas	1	Petrimonas	genus	Ok
Bacteria		Bacillota	Clostridia	Eubacteriales	Vallitaleaceae	Petrocella	1	Petrocella	genus	Ok
Bacteria		Bacillota	Clostridia	Eubacteriales	Oscillospiraceae	Petroclostridium	1	Petroclostridium	genus	Ok
Bacteria		Thermotogota	Thermotogae	Petrotogales	Petrotogaceae	Petrotoga	1	Petrotoga	genus	Ok
Bacteria		Pseudomonadota	Alphaproteobacteria	Rhodobacterales	Roseobacteraceae	Phaeobacter	1	Phaeobacter	genus	Ok
Bacteria		Bacteroidota	Saprospiria	Saprospirales	Haliscomenobacteraceae	Phaeodactylibacter	1	Phaeodactylibacter	genus	Ok
Bacteria		Pseudomonadota	Alphaproteobacteria	Rhodobacterales	Paracoccaceae	Phaeovulum	1	Phaeovulum	genus	Ok
Bacteria		Pseudomonadota	Alphaproteobacteria	Caulobacterales	Caulobacteraceae	Phenylobacterium	1	Phenylobacterium	genus	Ok
Bacteria		Bacteroidota	Bacteroidia	Bacteroidales	Bacteroidaceae	Phocaeicola	1	Phocaeicola	genus	Ok
Bacteria		Cyanobacteriota	Cyanophyceae	Pseudanabaenales	Leptolyngbyaceae	Phormidesmis	1	Phormidesmis	genus	Ok
Bacteria		Cyanobacteriota	Cyanophyceae	Oscillatoriales	Oscillatoriaceae	Phormidium	1	Phormidium	genus	Ok
Bacteria		Bacillota	Clostridia	Eubacteriales	Peptococcaceae	Phosphitispora	1	Phosphitispora	genus	Ok
Bacteria		Pseudomonadota	Gammaproteobacteria	Vibrionales	Vibrionaceae	Photobacterium	1	Photobacterium	genus	Ok
Bacteria		Pseudomonadota	Alphaproteobacteria	Hyphomicrobiales	Phreatobacteraceae	Phreatobacter	1	Phreatobacter	genus	Ok
Bacteria		Actinomycetota	Actinomycetes	Micrococcales	Intrasporangiaceae	Phycicoccus	1	Phycicoccus	genus	Ok
Bacteria		Planctomycetota	Phycisphaerae	Phycisphaerales	Phycisphaeraceae	Phycisphaera	1	Phycisphaera	genus	Ok
Bacteria		Pseudomonadota	Alphaproteobacteria	Rhodobacterales	Paracoccaceae	Phycocomes	1	Phycocomes	genus	Ok
Bacteria		Pseudomonadota	Alphaproteobacteria	Hyphomicrobiales	Phyllobacteriaceae	Phyllobacterium	1	Phyllobacterium	genus	Ok
Bacteria		Actinomycetota	Actinomycetes	Jiangellales	Jiangellaceae	Phytoactinopolyspora	1	Phytoactinopolyspora	genus	Ok
Bacteria		Pseudomonadota	Betaproteobacteria	Burkholderiales	Alcaligenaceae	Pigmentiphaga	1	Pigmentiphaga	genus	Ok
Bacteria		Pseudomonadota	Alphaproteobacteria	Rhodobacterales	Paracoccaceae	Pikeienuella	1	Pikeienuella	genus	Ok
Bacteria		Actinomycetota	Actinomycetes	Propionibacteriales	Nocardioidaceae	Pimelobacter	1	Pimelobacter	genus	Ok
Bacteria		Pseudomonadota	Alphaproteobacteria	Hyphomicrobiales	Ancalomicrobiaceae	Pinisolibacter	1	Pinisolibacter	genus	Ok
Bacteria		Planctomycetota	Planctomycetia	Pirellulales	Pirellulaceae	Pirellula	1	Pirellula	genus	Ok
Bacteria		Planctomycetota	Planctomycetia	Planctomycetales	Planctomycetaceae	Planctomicrobium	1	Planctomicrobium	genus	Ok
Bacteria		Planctomycetota	Planctomycetia	Planctomycetales	Planctomycetaceae	Planctomyces	1	Planctomyces	genus	Ok
Bacteria		Bacillota	Bacilli	Bacillales	Thermoactinomycetaceae	Planifilum	1	Planifilum	genus	Ok
Bacteria		Pseudomonadota	Alphaproteobacteria	Rhodobacterales	Paracoccaceae	Planktotalea	1	Planktotalea	genus	Ok
Bacteria						Planococcus	1	Planococcus	genus	Ok
Bacteria		Actinomycetota	Actinomycetes	Micrococcales	Microbacteriaceae	Plantibacter	1	Plantibacter	genus	Ok
Bacteria		Pseudomonadota	Alphaproteobacteria	Hyphomicrobiales	Pleomorphomonadaceae	Pleomorphomonas	1	Pleomorphomonas	genus	Ok
Bacteria		Pseudomonadota	Gammaproteobacteria	Enterobacterales	Enterobacteriaceae	Plesiomonas	1	Plesiomonas	genus	Ok
Bacteria		Pseudomonadota	Gammaproteobacteria	Enterobacterales	Enterobacteriaceae	Pluralibacter	1	Pluralibacter	genus	Ok
Bacteria		Bacteroidota	Flavobacteriia	Flavobacteriales	Flavobacteriaceae	Polaribacter	1	Polaribacter	genus	Ok
Bacteria		Pseudomonadota	Betaproteobacteria	Burkholderiales	Comamonadaceae	Polaromonas	1	Polaromonas	genus	Ok
Bacteria		Pseudomonadota	Gammaproteobacteria	Nevskiales	Sinobacteraceae	Polycyclovorans	1	Polycyclovorans	genus	Ok
Bacteria		Pseudomonadota	Alphaproteobacteria	Rhodobacterales	Paracoccaceae	Polymorphum	1	Polymorphum	genus	Ok
Bacteria		Pseudomonadota	Betaproteobacteria	Burkholderiales	Burkholderiaceae	Polynucleobacter	1	Polynucleobacter	genus	Ok
Bacteria		Pseudomonadota	Alphaproteobacteria	Rhodobacterales	Roseobacteraceae	Pontibaca	1	Pontibaca	genus	Ok
Bacteria		Bacteroidota	Cytophagia	Cytophagales	Hymenobacteraceae	Pontibacter	1	Pontibacter	genus	Ok
Bacteria		Pseudomonadota	Alphaproteobacteria	Rhodobacterales	Paracoccaceae	Pontibrevibacter	1	Pontibrevibacter	genus	Ok
Bacteria		Pseudomonadota	Alphaproteobacteria	Hyphomonadales	Hyphomonadaceae	Ponticaulis	1	Ponticaulis	genus	Ok
Bacteria						Ponticoccus	1	Ponticoccus	genus	Ok
Bacteria		Kiritimatiellota	Kiritimatiellia	Kiritimatiellales	Pontiellaceae	Pontiella	1	Pontiella	genus	Ok
Bacteria		Actinomycetota	Actinomycetes	Micrococcales	Microbacteriaceae	Pontimonas	1	Pontimonas	genus	Ok
Bacteria		Pseudomonadota	Alphaproteobacteria	Rhodobacterales	Paracoccaceae	Pontivivens	1	Pontivivens	genus	Ok
Bacteria		Pseudomonadota	Alphaproteobacteria	Sphingomonadales	Erythrobacteraceae	Porphyrobacter	1	Porphyrobacter	genus	Ok
Bacteria		Bacteroidota	Bacteroidia	Bacteroidales	Porphyromonadaceae	Porphyromonas	1	Porphyromonas	genus	Ok
Bacteria		Pseudomonadota	Gammaproteobacteria	Cellvibrionales	Porticoccaceae	Porticoccus	1	Porticoccus	genus	Ok
Bacteria		Pseudomonadota	Alphaproteobacteria	Rhodobacterales	Roseobacteraceae	Poseidonocella	1	Poseidonocella	genus	Ok
Bacteria		Planctomycetota	Planctomycetia	Pirellulales	Lacipirellulaceae	Posidoniimonas	1	Posidoniimonas	genus	Ok
Bacteria		Pseudomonadota	Gammaproteobacteria	Nevskiales	Steroidobacteraceae	Povalibacter	1	Povalibacter	genus	Ok
Bacteria		Actinomycetota	Actinomycetes	Pseudonocardiales	Pseudonocardiaceae	Prauserella	1	Prauserella	genus	Ok
Bacteria		Bacteroidota	Bacteroidia	Bacteroidales	Prevotellaceae	Prevotella	1	Prevotella	genus	Ok
Bacteria		Bacteroidota	Flavobacteriia	Flavobacteriales	Flavobacteriaceae	Pricia	1	Pricia	genus	Ok
Bacteria		Bacillota	Bacilli	Bacillales	Bacillaceae	Priestia	1	Priestia	genus	Ok
Bacteria		Pseudomonadota	Alphaproteobacteria	Rhodobacterales	Roseobacteraceae	Primorskyibacter	1	Primorskyibacter	genus	Ok
Bacteria		Bacteroidota	Bacteroidia	Marinilabiliales	Prolixibacteraceae	Prolixibacter	1	Prolixibacter	genus	Ok
Bacteria		Actinomycetota	Actinomycetes	Micrococcales	Promicromonosporaceae	Promicromonospora	1	Promicromonospora	genus	Ok
Bacteria		Actinomycetota	Actinomycetes	Propionibacteriales	Propionibacteriaceae	Propionibacterium	1	Propionibacterium	genus	Ok
Bacteria		Actinomycetota	Actinomycetes	Propionibacteriales	Propionibacteriaceae	Propioniciclava	1	Propioniciclava	genus	Ok
Bacteria		Actinomycetota	Actinomycetes	Propionibacteriales	Propionibacteriaceae	Propioniferax	1	Propioniferax	genus	Ok
Bacteria		Pseudomonadota	Betaproteobacteria	Rhodocyclales	Rhodocyclaceae	Propionivibrio	1	Propionivibrio	genus	Ok
Bacteria		Pseudomonadota	Alphaproteobacteria	Hyphomicrobiales	Propylenellaceae	Propylenella	1	Propylenella	genus	Ok
Bacteria		Verrucomicrobiota	Verrucomicrobiae	Verrucomicrobiales	Verrucomicrobiaceae	Prosthecobacter	1	Prosthecobacter	genus	Ok
Bacteria		Chlorobiota	Chlorobiia	Chlorobiales	Chlorobiaceae	Prosthecochloris	1	Prosthecochloris	genus	Ok
Bacteria		Pseudomonadota	Alphaproteobacteria	Hyphomicrobiales	Kaistiaceae	Prosthecomicrobium	1	Prosthecomicrobium	genus	Ok
Bacteria		Bacillota	Clostridia	Eubacteriales	Clostridiaceae	Proteiniclasticum	1	Proteiniclasticum	genus	Ok
Bacteria		Bacteroidota	Bacteroidia	Bacteroidales	Dysgonomonadaceae	Proteiniphilum	1	Proteiniphilum	genus	Ok
Bacteria						Proteus	1	Proteus	genus	Ok
Bacteria		Pseudomonadota	Gammaproteobacteria	Enterobacterales	Morganellaceae	Providencia	1	Providencia	genus	Ok
Bacteria		Acidobacteriota	Terriglobia	Terriglobales	Acidobacteriaceae	Pseudacidobacterium	1	Pseudacidobacterium	genus	Ok
Bacteria		Actinomycetota	Actinomycetes	Micrococcales	Cellulomonadaceae	Pseudactinotalea	1	Pseudactinotalea	genus	Ok
Bacteria		Pseudomonadota	Alphaproteobacteria	Hyphomicrobiales	Phyllobacteriaceae	Pseudaminobacter	1	Pseudaminobacter	genus	Ok
Bacteria		Actinomycetota	Actinomycetes	Micrococcales	Micrococcaceae	Pseudarthrobacter	1	Pseudarthrobacter	genus	Ok
Bacteria		Myxococcota		Nannocystales	Nannocystaceae	Pseudenhygromyxa	1	Pseudenhygromyxa	genus	Ok
Bacteria		Pseudomonadota	Gammaproteobacteria	Alteromonadales	Idiomarinaceae	Pseudidiomarina	1	Pseudidiomarina	genus	Ok
Bacteria		Pseudomonadota	Gammaproteobacteria	Alteromonadales	Pseudoalteromonadaceae	Pseudoalteromonas	1	Pseudoalteromonas	genus	Ok
Bacteria		Bdellovibrionota	Oligoflexia	Oligoflexales	Pseudobacteriovoracaceae	Pseudobacteriovorax	1	Pseudobacteriovorax	genus	Ok
Bacteria		Bacillota	Clostridia	Eubacteriales	Oscillospiraceae	Pseudobacteroides	1	Pseudobacteroides	genus	Ok
Bacteria		Bdellovibrionota	Bdellovibrionia	Bdellovibrionales	Pseudobdellovibrionaceae	Pseudobdellovibrio	1	Pseudobdellovibrio	genus	Ok
Bacteria		Pseudomonadota	Alphaproteobacteria	Hyphomicrobiales	Beijerinckiaceae	Pseudochelatococcus	1	Pseudochelatococcus	genus	Ok
Bacteria		Pseudomonadota	Alphaproteobacteria	Hyphomicrobiales	Brucellaceae	Pseudochrobactrum	1	Pseudochrobactrum	genus	Ok
Bacteria		Actinomycetota	Actinomycetes	Micrococcales	Microbacteriaceae	Pseudoclavibacter	1	Pseudoclavibacter	genus	Ok
Bacteria		Bacillota	Clostridia	Eubacteriales	Oscillospiraceae	Pseudoclostridium	1	Pseudoclostridium	genus	Ok
Bacteria		Thermodesulfobacteriota	Desulfovibrionia	Desulfovibrionales	Desulfovibrionaceae	Pseudodesulfovibrio	1	Pseudodesulfovibrio	genus	Ok
Bacteria		Pseudomonadota	Alphaproteobacteria	Rhodobacterales	Paracoccaceae	Pseudodonghicola	1	Pseudodonghicola	genus	Ok
Bacteria		Bacillota	Clostridia	Eubacteriales	Oscillospiraceae	Pseudoflavonifractor	1	Pseudoflavonifractor	genus	Ok
Bacteria		Pseudomonadota	Alphaproteobacteria	Rhodobacterales	Paracoccaceae	Pseudogemmobacter	1	Pseudogemmobacter	genus	Ok
Bacteria		Pseudomonadota	Alphaproteobacteria	Rhodobacterales	Paracoccaceae	Pseudohalocynthiibacter	1	Pseudohalocynthiibacter	genus	Ok
Bacteria		Pseudomonadota	Alphaproteobacteria	Hyphomicrobiales	Phyllobacteriaceae	Pseudohoeflea	1	Pseudohoeflea	genus	Ok
Bacteria		Pseudomonadota	Alphaproteobacteria	Hyphomicrobiales	Xanthobacteraceae	Pseudolabrys	1	Pseudolabrys	genus	Ok
Bacteria		Actinomycetota	Actinomycetes	Micrococcales	Microbacteriaceae	Pseudolysinimonas	1	Pseudolysinimonas	genus	Ok
Bacteria		Pseudomonadota	Gammaproteobacteria	Cellvibrionales	Cellvibrionaceae	Pseudomaricurvus	1	Pseudomaricurvus	genus	Ok
Bacteria		Pseudomonadota	Betaproteobacteria	Nitrosomonadales	Methylophilaceae	Pseudomethylobacillus	1	Pseudomethylobacillus	genus	Ok
Bacteria		Pseudomonadota	Gammaproteobacteria	Pseudomonadales	Pseudomonadaceae	Pseudomonas	1	Pseudomonas	genus	Ok
Bacteria		Actinomycetota	Actinomycetes	Pseudonocardiales	Pseudonocardiaceae	Pseudonocardia	1	Pseudonocardia	genus	Ok
Bacteria		Pseudomonadota	Alphaproteobacteria	Rhodobacterales	Paracoccaceae	Pseudooceanicola	1	Pseudooceanicola	genus	Ok
Bacteria		Pseudomonadota	Alphaproteobacteria	Rhodobacterales	Paracoccaceae	Pseudoprimorskyibacter	1	Pseudoprimorskyibacter	genus	Ok
Bacteria		Bacillota	Clostridia	Eubacteriales	Eubacteriaceae	Pseudoramibacter	1	Pseudoramibacter	genus	Ok
Bacteria		Pseudomonadota	Alphaproteobacteria	Hyphomicrobiales	Rhizobiaceae	Pseudorhizobium	1	Pseudorhizobium	genus	Ok
Bacteria		Pseudomonadota	Alphaproteobacteria	Rhodobacterales	Paracoccaceae	Pseudorhodobacter	1	Pseudorhodobacter	genus	Ok
Bacteria		Pseudomonadota	Betaproteobacteria	Burkholderiales	Comamonadaceae	Pseudorhodoferax	1	Pseudorhodoferax	genus	Ok
Bacteria		Pseudomonadota	Alphaproteobacteria	Hyphomicrobiales		Pseudorhodoplanes	1	Pseudorhodoplanes	genus	Ok
Bacteria		Pseudomonadota	Betaproteobacteria	Burkholderiales		Pseudorivibacter	1	Pseudorivibacter	genus	Ok
Bacteria		Pseudomonadota	Alphaproteobacteria	Rhodobacterales	Paracoccaceae	Pseudoroseicyclus	1	Pseudoroseicyclus	genus	Ok
Bacteria		Pseudomonadota	Alphaproteobacteria	Rhodobacterales	Roseobacteraceae	Pseudoruegeria	1	Pseudoruegeria	genus	Ok
Bacteria		Pseudomonadota	Alphaproteobacteria	Rhodobacterales	Roseobacteraceae	Pseudosulfitobacter	1	Pseudosulfitobacter	genus	Ok
Bacteria		Thermotogota	Thermotogae	Thermotogales	Thermotogaceae	Pseudothermotoga	1	Pseudothermotoga	genus	Ok
Bacteria		Pseudomonadota	Alphaproteobacteria	Hyphomicrobiales	Stappiaceae	Pseudovibrio	1	Pseudovibrio	genus	Ok
Bacteria		Pseudomonadota	Gammaproteobacteria	Xanthomonadales	Xanthomonadaceae	Pseudoxanthomonas	1	Pseudoxanthomonas	genus	Ok
Bacteria		Pseudomonadota	Gammaproteobacteria	Moraxellales	Moraxellaceae	Psychrobacter	1	Psychrobacter	genus	Ok
Bacteria		Bacteroidota	Flavobacteriia	Flavobacteriales	Flavobacteriaceae	Psychroflexus	1	Psychroflexus	genus	Ok
Bacteria		Bacteroidota	Flavobacteriia	Flavobacteriales	Flavobacteriaceae	Psychroserpens	1	Psychroserpens	genus	Ok
Bacteria		Actinomycetota	Actinomycetes	Micrococcales	Promicromonosporaceae	Puerhibacterium	1	Puerhibacterium	genus	Ok
Bacteria		Pseudomonadota	Alphaproteobacteria	Rhodobacterales	Paracoccaceae	Pukyongiella	1	Pukyongiella	genus	Ok
Bacteria		Pseudomonadota	Alphaproteobacteria	Rhodobacterales	Paracoccaceae	Puniceibacterium	1	Puniceibacterium	genus	Ok
Bacteria		Pseudomonadota	Betaproteobacteria	Burkholderiales	Alcaligenaceae	Pusillimonas	1	Pusillimonas	genus	Ok
Bacteria		Synergistota	Synergistia	Synergistales	Dethiosulfovibrionaceae	Pyramidobacter	1	Pyramidobacter	genus	Ok
Archaea		Euryarchaeota	Thermococci	Thermococcales	Thermococcaceae	Pyrococcus	1	Pyrococcus	genus	Ok
Archaea		Thermoproteota	Thermoprotei	Desulfurococcales	Pyrodictiaceae	Pyrodictium	1	Pyrodictium	genus	Ok
Bacteria		Pseudomonadota	Alphaproteobacteria	Hyphomicrobiales	Parvibaculaceae	Pyruvatibacter	1	Pyruvatibacter	genus	Ok
Bacteria		Myxococcota	Myxococcia	Myxococcales	Myxococcaceae	Pyxidicoccus	1	Pyxidicoccus	genus	Ok
Bacteria		Pseudomonadota	Alphaproteobacteria	Rhodobacterales	Paracoccaceae	Qingshengfaniella	1	Qingshengfaniella	genus	Ok
Bacteria		Pseudomonadota	Alphaproteobacteria	Sphingomonadales	Erythrobacteraceae	Qipengyuania	1	Qipengyuania	genus	Ok
Bacteria		Pseudomonadota	Betaproteobacteria	Burkholderiales	Burkholderiaceae	Quisquiliibacterium	1	Quisquiliibacterium	genus	Ok
Bacteria		Actinomycetota	Actinomycetes	Propionibacteriales	Propionibacteriaceae	Raineyella	1	Raineyella	genus	Ok
Bacteria		Pseudomonadota	Betaproteobacteria	Burkholderiales	Burkholderiaceae	Ralstonia	1	Ralstonia	genus	Ok
Bacteria		Pseudomonadota	Betaproteobacteria	Burkholderiales	Comamonadaceae	Ramlibacter	1	Ramlibacter	genus	Ok
Bacteria		Pseudomonadota	Gammaproteobacteria	Enterobacterales	Enterobacteriaceae	Raoultella	1	Raoultella	genus	Ok
Bacteria		Actinomycetota	Actinomycetes	Micrococcales	Microbacteriaceae	Rathayibacter	1	Rathayibacter	genus	Ok
Bacteria		Actinomycetota	Actinomycetes	Micrococcales	Micrococcaceae	Renibacterium	1	Renibacterium	genus	Ok
Bacteria		Pseudomonadota	Alphaproteobacteria	Hyphomicrobiales	Reyranellaceae	Reyranella	1	Reyranella	genus	Ok
Bacteria		Pseudomonadota	Gammaproteobacteria	Chromatiales	Chromatiaceae	Rhabdochromatium	1	Rhabdochromatium	genus	Ok
Bacteria		Pseudomonadota	Gammaproteobacteria	Chromatiales	Chromatiaceae	Rheinheimera	1	Rheinheimera	genus	Ok
Bacteria		Pseudomonadota	Betaproteobacteria	Burkholderiales		Rhizobacter	1	Rhizobacter	genus	Ok
Bacteria		Pseudomonadota	Alphaproteobacteria	Hyphomicrobiales	Rhizobiaceae	Rhizobium	1	Rhizobium	genus	Ok
Bacteria		Pseudomonadota	Alphaproteobacteria	Sphingomonadales	Sphingomonadaceae	Rhizorhabdus	1	Rhizorhabdus	genus	Ok
Bacteria		Pseudomonadota	Gammaproteobacteria	Xanthomonadales	Rhodanobacteraceae	Rhodanobacter	1	Rhodanobacter	genus	Ok
Bacteria		Pseudomonadota	Alphaproteobacteria	Rhodobacterales	Paracoccaceae	Rhodobacter	1	Rhodobacter	genus	Ok
Bacteria		Pseudomonadota	Alphaproteobacteria	Rhodobacterales	Paracoccaceae	Rhodobaculum	1	Rhodobaculum	genus	Ok
Bacteria						Rhodobium	1	Rhodobium	genus	Ok
Bacteria		Pseudomonadota	Alphaproteobacteria	Hyphomicrobiales	Beijerinckiaceae	Rhodoblastus	1	Rhodoblastus	genus	Ok
Bacteria		Rhodothermota	Rhodothermia	Rhodothermales	Rhodothermaceae	Rhodocaloribacter	1	Rhodocaloribacter	genus	Ok
Bacteria						Rhodococcus	1	Rhodococcus	genus	Ok
Bacteria		Bacteroidota	Cytophagia	Cytophagales	Cytophagaceae	Rhodocytophaga	1	Rhodocytophaga	genus	Ok
Bacteria		Pseudomonadota	Betaproteobacteria	Burkholderiales	Comamonadaceae	Rhodoferax	1	Rhodoferax	genus	Ok
Bacteria		Balneolota	Balneolia	Balneolales	Balneolaceae	Rhodohalobacter	1	Rhodohalobacter	genus	Ok
Bacteria		Pseudomonadota	Alphaproteobacteria	Hyphomicrobiales	Parvibaculaceae	Rhodoligotrophos	1	Rhodoligotrophos	genus	Ok
Bacteria		Actinomycetota	Actinomycetes	Micrococcales	Microbacteriaceae	Rhodoluna	1	Rhodoluna	genus	Ok
Bacteria		Pseudomonadota	Alphaproteobacteria	Hyphomicrobiales	Hyphomicrobiaceae	Rhodomicrobium	1	Rhodomicrobium	genus	Ok
Bacteria		Planctomycetota	Planctomycetia	Pirellulales	Pirellulaceae	Rhodopirellula	1	Rhodopirellula	genus	Ok
Bacteria		Pseudomonadota	Alphaproteobacteria	Hyphomicrobiales	Hyphomicrobiaceae	Rhodoplanes	1	Rhodoplanes	genus	Ok
Bacteria		Pseudomonadota	Alphaproteobacteria	Hyphomicrobiales	Nitrobacteraceae	Rhodopseudomonas	1	Rhodopseudomonas	genus	Ok
Bacteria		Pseudomonadota	Alphaproteobacteria	Rhodobacterales	Paracoccaceae	Rhodosalinus	1	Rhodosalinus	genus	Ok
Bacteria		Pseudomonadota	Alphaproteobacteria	Rhodospirillales	Rhodospirillaceae	Rhodospira	1	Rhodospira	genus	Ok
Bacteria		Pseudomonadota	Alphaproteobacteria	Rhodospirillales	Rhodospirillaceae	Rhodospirillum	1	Rhodospirillum	genus	Ok
Bacteria		Pseudomonadota	Alphaproteobacteria	Rhodothalassiales	Rhodothalassiaceae	Rhodothalassium	1	Rhodothalassium	genus	Ok
Bacteria		Rhodothermota	Rhodothermia	Rhodothermales	Rhodothermaceae	Rhodothermus	1	Rhodothermus	genus	Ok
Bacteria		Pseudomonadota	Alphaproteobacteria	Rhodospirillales	Acetobacteraceae	Rhodovarius	1	Rhodovarius	genus	Ok
Bacteria		Pseudomonadota	Alphaproteobacteria	Hyphomicrobiales	Rhodovibrionaceae	Rhodovibrio	1	Rhodovibrio	genus	Ok
Bacteria		Pseudomonadota	Alphaproteobacteria	Rhodobacterales	Paracoccaceae	Rhodovulum	1	Rhodovulum	genus	Ok
Bacteria		Cyanobacteriota	Cyanophyceae	Nostocales	Nostocaceae	Richelia	1	Richelia	genus	Ok
Bacteria		Pseudomonadota	Alphaproteobacteria	Rickettsiales	Rickettsiaceae	Rickettsia	1	Rickettsia	genus	Ok
Bacteria		Pseudomonadota	Gammaproteobacteria	Legionellales	Coxiellaceae	Rickettsiella	1	Rickettsiella	genus	Ok
Bacteria						Rivicola	1	Rivicola	genus	Ok
Bacteria						Rivularia	1	Rivularia	genus	Ok
Bacteria		Pseudomonadota	Betaproteobacteria	Burkholderiales	Burkholderiaceae	Robbsia	1	Robbsia	genus	Ok
Bacteria		Pseudomonadota	Alphaproteobacteria	Maricaulales	Robiginitomaculaceae	Robiginitomaculum	1	Robiginitomaculum	genus	Ok
Bacteria		Pseudomonadota	Betaproteobacteria	Burkholderiales	Sphaerotilaceae	Roseateles	1	Roseateles	genus	Ok
Bacteria		Bacillota	Clostridia	Eubacteriales	Lachnospiraceae	Roseburia	1	Roseburia	genus	Ok
Bacteria		Pseudomonadota	Alphaproteobacteria	Rhodobacterales	Paracoccaceae	Roseibaca	1	Roseibaca	genus	Ok
Bacteria		Verrucomicrobiota	Verrucomicrobiae	Verrucomicrobiales	Verrucomicrobiaceae	Roseibacillus	1	Roseibacillus	genus	Ok
Bacteria		Pseudomonadota	Alphaproteobacteria	Rhodobacterales	Roseobacteraceae	Roseibacterium	1	Roseibacterium	genus	Ok
Bacteria		Pseudomonadota	Alphaproteobacteria	Hyphomicrobiales	Stappiaceae	Roseibium	1	Roseibium	genus	Ok
Bacteria		Pseudomonadota	Alphaproteobacteria	Rhodospirillales	Acetobacteraceae	Roseicella	1	Roseicella	genus	Ok
Bacteria		Pseudomonadota	Alphaproteobacteria	Rhodobacterales	Paracoccaceae	Roseicitreum	1	Roseicitreum	genus	Ok
Bacteria		Planctomycetota	Planctomycetia	Pirellulales	Pirellulaceae	Roseiconus	1	Roseiconus	genus	Ok
Bacteria		Pseudomonadota	Alphaproteobacteria	Rhodobacterales	Roseobacteraceae	Roseicyclus	1	Roseicyclus	genus	Ok
Bacteria		Chloroflexota	Chloroflexia	Chloroflexales	Roseiflexaceae	Roseiflexus	1	Roseiflexus	genus	Ok
Bacteria		Planctomycetota	Planctomycetia	Pirellulales	Pirellulaceae	Roseimaritima	1	Roseimaritima	genus	Ok
Bacteria		Verrucomicrobiota	Verrucomicrobiae	Verrucomicrobiales	Verrucomicrobiaceae	Roseimicrobium	1	Roseimicrobium	genus	Ok
Bacteria		Pseudomonadota	Alphaproteobacteria	Rhodobacterales	Paracoccaceae	Roseinatronobacter	1	Roseinatronobacter	genus	Ok
Bacteria		Pseudomonadota	Alphaproteobacteria	Rhodobacterales	Roseobacteraceae	Roseisalinus	1	Roseisalinus	genus	Ok
Bacteria		Pseudomonadota	Alphaproteobacteria	Hyphomicrobiales	Phyllobacteriaceae	Roseitalea	1	Roseitalea	genus	Ok
Bacteria		Pseudomonadota	Alphaproteobacteria	Rhodobacterales	Paracoccaceae	Roseitranquillus	1	Roseitranquillus	genus	Ok
Bacteria		Pseudomonadota	Alphaproteobacteria	Rhodobacterales	Roseobacteraceae	Roseivivax	1	Roseivivax	genus	Ok
Bacteria		Pseudomonadota	Gammaproteobacteria	Enterobacterales	Erwiniaceae	Rosenbergiella	1	Rosenbergiella	genus	Ok
Bacteria		Pseudomonadota	Alphaproteobacteria	Rhodobacterales	Roseobacteraceae	Roseobacter	1	Roseobacter	genus	Ok
Bacteria		Pseudomonadota	Alphaproteobacteria	Rhodospirillales	Acetobacteraceae	Roseomonas	1	Roseomonas	genus	Ok
Bacteria		Pseudomonadota	Alphaproteobacteria	Rhodospirillales	Rhodospirillaceae	Roseospira	1	Roseospira	genus	Ok
Bacteria		Pseudomonadota	Alphaproteobacteria	Rhodospirillales	Rhodospirillaceae	Roseospirillum	1	Roseospirillum	genus	Ok
Bacteria		Pseudomonadota	Alphaproteobacteria	Rhodobacterales	Roseobacteraceae	Roseovarius	1	Roseovarius	genus	Ok
Bacteria		Planctomycetota	Planctomycetia	Pirellulales	Pirellulaceae	Rosistilla	1	Rosistilla	genus	Ok
Bacteria						Rothia	1	Rothia	genus	Ok
Bacteria		Pseudomonadota	Gammaproteobacteria	Enterobacterales	Yersiniaceae	Rouxiella	1	Rouxiella	genus	Ok
Bacteria		Actinomycetota	Actinomycetes	Micrococcales	Ruaniaceae	Ruania	1	Ruania	genus	Ok
Bacteria		Pseudomonadota	Alphaproteobacteria	Rhodobacterales	Roseobacteraceae	Rubellimicrobium	1	Rubellimicrobium	genus	Ok
Bacteria		Pseudomonadota	Alphaproteobacteria	Rhodobacterales	Paracoccaceae	Rubrimonas	1	Rubrimonas	genus	Ok
Bacteria		Pseudomonadota	Betaproteobacteria	Burkholderiales	Sphaerotilaceae	Rubrivivax	1	Rubrivivax	genus	Ok
Bacteria		Actinomycetota	Rubrobacteria	Rubrobacterales	Rubrobacteraceae	Rubrobacter	1	Rubrobacter	genus	Ok
Bacteria		Pseudomonadota	Gammaproteobacteria	Xanthomonadales	Rhodanobacteraceae	Rudaea	1	Rudaea	genus	Ok
Bacteria		Pseudomonadota	Alphaproteobacteria	Rhodobacterales	Roseobacteraceae	Ruegeria	1	Ruegeria	genus	Ok
Bacteria		Bacteroidota	Cytophagia	Cytophagales	Hymenobacteraceae	Rufibacter	1	Rufibacter	genus	Ok
Bacteria		Verrucomicrobiota	Opitutae	Puniceicoccales	Cerasicoccaceae	Ruficoccus	1	Ruficoccus	genus	Ok
Bacteria		Bacillota	Clostridia	Eubacteriales	Oscillospiraceae	Ruminiclostridium	1	Ruminiclostridium	genus	Ok
Bacteria		Bacillota	Clostridia	Eubacteriales	Oscillospiraceae	Ruminococcus	1	Ruminococcus	genus	Ok
Bacteria		Bacteroidota	Cytophagia	Cytophagales	Spirosomaceae	Runella	1	Runella	genus	Ok
Bacteria		Bacillota	Clostridia	Eubacteriales	Oscillospiraceae	Ruthenibacterium	1	Ruthenibacterium	genus	Ok
Bacteria		Bacillota	Bacilli	Bacillales	Paenibacillaceae	Saccharibacillus	1	Saccharibacillus	genus	Ok
Bacteria		Bacteroidota	Bacteroidia	Marinilabiliales	Marinilabiliaceae	Saccharicrinis	1	Saccharicrinis	genus	Ok
Bacteria		Actinomycetota	Actinomycetes	Pseudonocardiales	Pseudonocardiaceae	Saccharomonospora	1	Saccharomonospora	genus	Ok
Bacteria		Pseudomonadota	Gammaproteobacteria	Cellvibrionales	Cellvibrionaceae	Saccharophagus	1	Saccharophagus	genus	Ok
Bacteria		Actinomycetota	Actinomycetes	Pseudonocardiales	Pseudonocardiaceae	Saccharopolyspora	1	Saccharopolyspora	genus	Ok
Bacteria		Pseudomonadota	Alphaproteobacteria	Rhodobacterales	Roseobacteraceae	Sagittula	1	Sagittula	genus	Ok
Bacteria		Pseudomonadota	Alphaproteobacteria	Hyphomicrobiales	Phyllobacteriaceae	Salaquimonas	1	Salaquimonas	genus	Ok
Bacteria		Pseudomonadota	Alphaproteobacteria	Rhodobacterales	Roseobacteraceae	Salibaculum	1	Salibaculum	genus	Ok
Bacteria		Thermodesulfobacteriota	Desulfovibrionia	Desulfovibrionales	Desulfovibrionaceae	Salidesulfovibrio	1	Salidesulfovibrio	genus	Ok
Bacteria		Bacillota	Bacilli	Bacillales	Bacillaceae	Salimicrobium	1	Salimicrobium	genus	Ok
Bacteria		Pseudomonadota	Alphaproteobacteria	Hyphomicrobiales	Salinarimonadaceae	Salinarimonas	1	Salinarimonas	genus	Ok
Bacteria		Rhodothermota	Rhodothermia	Rhodothermales	Salinibacteraceae	Salinibacter	1	Salinibacter	genus	Ok
Bacteria		Actinomycetota	Actinomycetes	Micrococcales	Microbacteriaceae	Salinibacterium	1	Salinibacterium	genus	Ok
Bacteria		Bacillota	Bacilli	Bacillales	Staphylococcaceae	Salinicoccus	1	Salinicoccus	genus	Ok
Bacteria		Pseudomonadota	Gammaproteobacteria	Oceanospirillales	Halomonadaceae	Salinicola	1	Salinicola	genus	Ok
Bacteria		Pseudomonadota	Alphaproteobacteria	Rhodobacterales	Roseobacteraceae	Salinihabitans	1	Salinihabitans	genus	Ok
Bacteria		Bacteroidota	Flavobacteriia	Flavobacteriales	Flavobacteriaceae	Salinimicrobium	1	Salinimicrobium	genus	Ok
Bacteria		Pseudomonadota	Gammaproteobacteria	Salinisphaerales	Salinisphaeraceae	Salinisphaera	1	Salinisphaera	genus	Ok
Bacteria		Spirochaetota	Spirochaetia	Spirochaetales	Spirochaetaceae	Salinispira	1	Salinispira	genus	Ok
Bacteria		Pseudomonadota	Gammaproteobacteria	Vibrionales	Vibrionaceae	Salinivibrio	1	Salinivibrio	genus	Ok
Bacteria						Salinivirga	1	Salinivirga	genus	Ok
Bacteria		Pseudomonadota	Alphaproteobacteria	Rhodobacterales	Roseobacteraceae	Salipiger	1	Salipiger	genus	Ok
Bacteria		Bacillota	Bacilli	Bacillales	Bacillaceae	Salirhabdus	1	Salirhabdus	genus	Ok
Bacteria		Pseudomonadota	Gammaproteobacteria	Enterobacterales	Enterobacteriaceae	Salmonella	1	Salmonella	genus	Ok
Bacteria		Actinomycetota	Nitriliruptoria	Salsipaludibacterales	Salsipaludibacteraceae	Salsipaludibacter	1	Salsipaludibacter	genus	Ok
Bacteria		Pseudomonadota	Alphaproteobacteria	Sphingomonadales	Sphingosinicellaceae	Sandaracinobacter	1	Sandaracinobacter	genus	Ok
Bacteria		Pseudomonadota	Alphaproteobacteria	Sphingomonadales	Sphingosinicellaceae	Sandaracinobacteroides	1	Sandaracinobacteroides	genus	Ok
Bacteria		Myxococcota		Polyangiales	Sandaracinaceae	Sandaracinus	1	Sandaracinus	genus	Ok
Bacteria		Pseudomonadota	Alphaproteobacteria	Sphingomonadales	Sphingosinicellaceae	Sandarakinorhabdus	1	Sandarakinorhabdus	genus	Ok
Bacteria		Actinomycetota	Actinomycetes	Micrococcales	Sanguibacteraceae	Sanguibacter	1	Sanguibacter	genus	Ok
Bacteria		Actinomycetota	Actinomycetes	Actinomycetales	Actinomycetaceae	Schaalia	1	Schaalia	genus	Ok
Bacteria						Schlegelella	1	Schlegelella	genus	Ok
Bacteria		Bacteroidota	Flavobacteriia	Flavobacteriales	Schleiferiaceae	Schleiferia	1	Schleiferia	genus	Ok
Bacteria		Bacillota	Tissierellia	Tissierellales	Tepidimicrobiaceae	Schnuerera	1	Schnuerera	genus	Ok
Bacteria		Actinomycetota	Actinomycetes	Micrococcales	Microbacteriaceae	Schumannella	1	Schumannella	genus	Ok
Bacteria		Fusobacteriota	Fusobacteriia	Fusobacteriales	Leptotrichiaceae	Sebaldella	1	Sebaldella	genus	Ok
Bacteria		Bacillota	Tissierellia			Sedimentibacter	1	Sedimentibacter	genus	Ok
Bacteria		Pseudomonadota	Gammaproteobacteria			Sedimenticola	1	Sedimenticola	genus	Ok
Bacteria		Planctomycetota	Phycisphaerae	Sedimentisphaerales	Sedimentisphaeraceae	Sedimentisphaera	1	Sedimentisphaera	genus	Ok
Bacteria		Pseudomonadota	Alphaproteobacteria	Rhodobacterales	Paracoccaceae	Sedimentitalea	1	Sedimentitalea	genus	Ok
Bacteria		Bacteroidota	Chitinophagia	Chitinophagales	Chitinophagaceae	Sediminibacterium	1	Sediminibacterium	genus	Ok
Bacteria		Pseudomonadota	Alphaproteobacteria	Rhodobacterales	Roseobacteraceae	Sediminimonas	1	Sediminimonas	genus	Ok
Bacteria		Spirochaetota	Spirochaetia	Spirochaetales	Spirochaetaceae	Sediminispirochaeta	1	Sediminispirochaeta	genus	Ok
Bacteria		Pseudomonadota	Alphaproteobacteria	Hyphomicrobiales	Segnochrobactraceae	Segnochrobactrum	1	Segnochrobactrum	genus	Ok
Bacteria		Bacillota	Clostridia	Halanaerobiales	Halobacteroidaceae	Selenihalanaerobacter	1	Selenihalanaerobacter	genus	Ok
Bacteria		Deferribacterota	Deferribacteres	Deferribacterales	Geovibrionaceae	Seleniivibrio	1	Seleniivibrio	genus	Ok
Bacteria		Bacillota	Negativicutes	Selenomonadales	Selenomonadaceae	Selenomonas	1	Selenomonas	genus	Ok
Bacteria		Pseudomonadota	Alphaproteobacteria	Rhodobacterales	Roseobacteraceae	Seohaeicola	1	Seohaeicola	genus	Ok
Bacteria		Pseudomonadota	Gammaproteobacteria	Cellvibrionales	Halieaceae	Seongchinamella	1	Seongchinamella	genus	Ok
Bacteria		Actinomycetota	Actinomycetes	Micrococcales	Beutenbergiaceae	Serinibacter	1	Serinibacter	genus	Ok
Bacteria		Pseudomonadota	Betaproteobacteria	Burkholderiales	Comamonadaceae	Serpentinimonas	1	Serpentinimonas	genus	Ok
Bacteria						Serratia	1	Serratia	genus	Ok
Bacteria		Pseudomonadota	Gammaproteobacteria	Alteromonadales	Shewanellaceae	Shewanella	1	Shewanella	genus	Ok
Bacteria		Pseudomonadota	Gammaproteobacteria	Enterobacterales	Enterobacteriaceae	Shigella	1	Shigella	genus	Ok
Bacteria		Pseudomonadota	Alphaproteobacteria	Rhodobacterales	Roseobacteraceae	Shimia	1	Shimia	genus	Ok
Bacteria		Pseudomonadota	Alphaproteobacteria	Hyphomicrobiales	Rhizobiaceae	Shinella	1	Shinella	genus	Ok
Bacteria		Bacteroidota	Cytophagia	Cytophagales	Hymenobacteraceae	Siccationidurans	1	Siccationidurans	genus	Ok
Bacteria		Pseudomonadota	Alphaproteobacteria	Rhodospirillales	Acetobacteraceae	Siccirubricoccus	1	Siccirubricoccus	genus	Ok
Bacteria		Pseudomonadota	Alphaproteobacteria	Hyphomicrobiales	Ancalomicrobiaceae	Siculibacillus	1	Siculibacillus	genus	Ok
Bacteria		Pseudomonadota	Betaproteobacteria	Nitrosomonadales	Gallionellaceae	Sideroxydans	1	Sideroxydans	genus	Ok
Bacteria		Pseudomonadota	Alphaproteobacteria	Rhodobacterales	Paracoccaceae	Silicimonas	1	Silicimonas	genus	Ok
Bacteria		Chlamydiota	Chlamydiia	Parachlamydiales	Simkaniaceae	Simkania	1	Simkania	genus	Ok
Bacteria		Bacillota	Clostridia	Eubacteriales	Eubacteriales Family XIII. Incertae Sedis	Sinanaerobacter	1	Sinanaerobacter	genus	Ok
Bacteria		Pseudomonadota	Gammaproteobacteria	Nevskiales	Sinobacteraceae	Sinimarinibacterium	1	Sinimarinibacterium	genus	Ok
Bacteria		Pseudomonadota	Alphaproteobacteria	Rhodobacterales	Paracoccaceae	Sinirhodobacter	1	Sinirhodobacter	genus	Ok
Bacteria		Bacillota	Bacilli	Bacillales	Sporolactobacillaceae	Sinobaca	1	Sinobaca	genus	Ok
Bacteria		Pseudomonadota	Alphaproteobacteria	Hyphomicrobiales	Rhizobiaceae	Sinorhizobium	1	Sinorhizobium	genus	Ok
Bacteria		Bacteroidota	Cytophagia	Cytophagales	Cytophagaceae	Siphonobacter	1	Siphonobacter	genus	Ok
Bacteria		Pseudomonadota	Alphaproteobacteria	Rhodospirillales	Azospirillaceae	Skermanella	1	Skermanella	genus	Ok
Bacteria		Thermodesulfobacteriota	Syntrophia	Syntrophales	Smithellaceae	Smithella	1	Smithella	genus	Ok
Bacteria		Pseudomonadota	Alphaproteobacteria	Sneathiellales	Sneathiellaceae	Sneathiella	1	Sneathiella	genus	Ok
Bacteria		Pseudomonadota	Gammaproteobacteria	Enterobacterales	Bruguierivoracaceae	Sodalis	1	Sodalis	genus	Ok
Bacteria		Bacillota	Tissierellia	Tissierellales	Tissierellaceae	Soehngenia	1	Soehngenia	genus	Ok
Bacteria		Bacillota	Bacilli	Bacillales	Planococcaceae	Solibacillus	1	Solibacillus	genus	Ok
Bacteria		Pseudomonadota	Gammaproteobacteria	Nevskiales	Sinobacteraceae	Solimonas	1	Solimonas	genus	Ok
Bacteria		Pseudomonadota	Alphaproteobacteria	Rhodobacterales	Paracoccaceae	Solirhodobacter	1	Solirhodobacter	genus	Ok
Bacteria		Actinomycetota	Thermoleophilia	Solirubrobacterales	Solirubrobacteraceae	Solirubrobacter	1	Solirubrobacter	genus	Ok
Bacteria		Bacillota	Erysipelotrichia	Erysipelotrichales	Erysipelotrichaceae	Solobacterium	1	Solobacterium	genus	Ok
Bacteria		Myxococcota		Polyangiales	Polyangiaceae	Sorangium	1	Sorangium	genus	Ok
Bacteria		Actinomycetota	Actinomycetes	Streptosporangiales	Streptosporangiaceae	Sphaerisporangium	1	Sphaerisporangium	genus	Ok
Bacteria		Thermomicrobiota	Thermomicrobia	Sphaerobacterales	Sphaerobacteraceae	Sphaerobacter	1	Sphaerobacter	genus	Ok
Bacteria		Spirochaetota	Spirochaetia	Spirochaetales	Sphaerochaetaceae	Sphaerochaeta	1	Sphaerochaeta	genus	Ok
Bacteria		Bacteroidota	Sphingobacteriia	Sphingobacteriales	Sphingobacteriaceae	Sphingobacterium	1	Sphingobacterium	genus	Ok
Bacteria		Pseudomonadota	Alphaproteobacteria	Sphingomonadales	Sphingomonadaceae	Sphingobium	1	Sphingobium	genus	Ok
Bacteria		Pseudomonadota	Alphaproteobacteria	Sphingomonadales	Sphingomonadaceae	Sphingomicrobium	1	Sphingomicrobium	genus	Ok
Bacteria		Pseudomonadota	Alphaproteobacteria	Sphingomonadales	Sphingomonadaceae	Sphingomonas	1	Sphingomonas	genus	Ok
Bacteria		Pseudomonadota	Alphaproteobacteria	Sphingomonadales	Sphingomonadaceae	Sphingopyxis	1	Sphingopyxis	genus	Ok
Bacteria		Pseudomonadota	Alphaproteobacteria	Sphingomonadales	Sphingomonadaceae	Sphingorhabdus	1	Sphingorhabdus	genus	Ok
Bacteria		Pseudomonadota	Alphaproteobacteria	Sphingomonadales	Sphingosinicellaceae	Sphingosinicella	1	Sphingosinicella	genus	Ok
Bacteria		Pseudomonadota	Alphaproteobacteria	Sphingomonadales	Sphingomonadaceae	Sphingosinithalassobacter	1	Sphingosinithalassobacter	genus	Ok
Bacteria		Actinomycetota	Actinomycetes	Streptosporangiales	Nocardiopsaceae	Spiractinospora	1	Spiractinospora	genus	Ok
Bacteria		Pseudomonadota	Gammaproteobacteria	Chromatiales	Ectothiorhodospiraceae	Spiribacter	1	Spiribacter	genus	Ok
Bacteria		Spirochaetota	Spirochaetia	Spirochaetales	Spirochaetaceae	Spirochaeta	1	Spirochaeta	genus	Ok
Bacteria		Bacteroidota	Cytophagia	Cytophagales	Cytophagaceae	Spirosoma	1	Spirosoma	genus	Ok
Bacteria		Pseudomonadota	Gammaproteobacteria	Cellvibrionales	Spongiibacteraceae	Spongiibacter	1	Spongiibacter	genus	Ok
Bacteria		Actinomycetota	Actinomycetes	Sporichthyales	Sporichthyaceae	Sporichthya	1	Sporichthya	genus	Ok
Bacteria		Bacillota	Clostridia	Eubacteriales	Oscillospiraceae	Sporobacter	1	Sporobacter	genus	Ok
Bacteria		Bacillota	Clostridia	Halanaerobiales	Halobacteroidaceae	Sporohalobacter	1	Sporohalobacter	genus	Ok
Bacteria		Bacillota	Bacilli	Bacillales	Sporolactobacillaceae	Sporolactobacillus	1	Sporolactobacillus	genus	Ok
Bacteria		Bacillota	Negativicutes	Selenomonadales	Sporomusaceae	Sporomusa	1	Sporomusa	genus	Ok
Bacteria		Bacillota	Bacilli	Bacillales	Planococcaceae	Sporosarcina	1	Sporosarcina	genus	Ok
Bacteria		Bacillota	Clostridia	Eubacteriales	Desulfallaceae	Sporotomaculum	1	Sporotomaculum	genus	Ok
Bacteria		Pseudomonadota	Alphaproteobacteria	Sphingomonadales	Sphingomonadaceae	Stakelama	1	Stakelama	genus	Ok
Bacteria		Bacillota	Bacilli	Bacillales	Staphylococcaceae	Staphylococcus	1	Staphylococcus	genus	Ok
Archaea		Thermoproteota	Thermoprotei	Desulfurococcales	Desulfurococcaceae	Staphylothermus	1	Staphylothermus	genus	Ok
Bacteria		Pseudomonadota	Alphaproteobacteria	Hyphomicrobiales	Stappiaceae	Stappia	1	Stappia	genus	Ok
Bacteria		Pseudomonadota	Alphaproteobacteria	Hyphomicrobiales	Xanthobacteraceae	Starkeya	1	Starkeya	genus	Ok
Bacteria		Pseudomonadota	Alphaproteobacteria	Rhodospirillales	Stellaceae	Stella	1	Stella	genus	Ok
Bacteria		Pseudomonadota	Gammaproteobacteria	Xanthomonadales	Xanthomonadaceae	Stenotrophomonas	1	Stenotrophomonas	genus	Ok
Bacteria		Pseudomonadota	Gammaproteobacteria	Nevskiales	Steroidobacteraceae	Steroidobacter	1	Steroidobacter	genus	Ok
Bacteria		Pseudomonadota	Betaproteobacteria	Nitrosomonadales	Sterolibacteriaceae	Sterolibacterium	1	Sterolibacterium	genus	Ok
Bacteria		Bacillota	Clostridia	Eubacteriales	Lachnospiraceae	Stomatobaculum	1	Stomatobaculum	genus	Ok
Bacteria		Fusobacteriota	Fusobacteriia	Fusobacteriales	Leptotrichiaceae	Streptobacillus	1	Streptobacillus	genus	Ok
Bacteria		Bacillota	Bacilli	Lactobacillales	Streptococcaceae	Streptococcus	1	Streptococcus	genus	Ok
Bacteria		Actinomycetota	Actinomycetes	Kitasatosporales	Streptomycetaceae	Streptomyces	1	Streptomyces	genus	Ok
Bacteria		Actinomycetota	Actinomycetes	Streptosporangiales	Streptosporangiaceae	Streptosporangium	1	Streptosporangium	genus	Ok
Bacteria		Bacillota	Clostridia	Eubacteriales	Oscillospiraceae	Subdoligranulum	1	Subdoligranulum	genus	Ok
Bacteria		Bacteroidota	Flavobacteriia	Flavobacteriales	Flavobacteriaceae	Subsaximicrobium	1	Subsaximicrobium	genus	Ok
Bacteria		Acidobacteriota	Holophagae	Acanthopleuribacterales	Acanthopleuribacteraceae	Sulfidibacter	1	Sulfidibacter	genus	Ok
Bacteria		Pseudomonadota	Alphaproteobacteria	Rhodobacterales	Roseobacteraceae	Sulfitobacter	1	Sulfitobacter	genus	Ok
Bacteria		Bacillota	Clostridia	Eubacteriales	Clostridiales Family XVII. Incertae Sedis	Sulfobacillus	1	Sulfobacillus	genus	Ok
Archaea		Thermoproteota	Thermoprotei	Sulfolobales	Sulfolobaceae	Sulfolobus	1	Sulfolobus	genus	Ok
Bacteria		Pseudomonadota	Betaproteobacteria	Nitrosomonadales	Sulfuricellaceae	Sulfuricella	1	Sulfuricella	genus	Ok
Bacteria		Campylobacterota	Epsilonproteobacteria	Campylobacterales	Sulfurimonadaceae	Sulfuricurvum	1	Sulfuricurvum	genus	Ok
Bacteria		Pseudomonadota	Betaproteobacteria	Nitrosomonadales	Sulfuricellaceae	Sulfuriferula	1	Sulfuriferula	genus	Ok
Bacteria		Aquificota	Aquificae	Aquificales	Hydrogenothermaceae	Sulfurihydrogenibium	1	Sulfurihydrogenibium	genus	Ok
Bacteria		Campylobacterota	Epsilonproteobacteria	Campylobacterales	Sulfurimonadaceae	Sulfurimonas	1	Sulfurimonas	genus	Ok
Bacteria		Pseudomonadota	Betaproteobacteria	Nitrosomonadales	Sterolibacteriaceae	Sulfuritalea	1	Sulfuritalea	genus	Ok
Bacteria		Pseudomonadota	Betaproteobacteria	Nitrosomonadales	Thiobacillaceae	Sulfuritortus	1	Sulfuritortus	genus	Ok
Bacteria		Pseudomonadota	Gammaproteobacteria	Chromatiales	Thioalkalispiraceae	Sulfurivermis	1	Sulfurivermis	genus	Ok
Bacteria		Pseudomonadota	Gammaproteobacteria	Thiotrichales	Piscirickettsiaceae	Sulfurivirga	1	Sulfurivirga	genus	Ok
Bacteria		Campylobacterota	Epsilonproteobacteria	Campylobacterales	Sulfurospirillaceae	Sulfurospirillum	1	Sulfurospirillum	genus	Ok
Bacteria		Campylobacterota	Epsilonproteobacteria	Campylobacterales	Sulfurovaceae	Sulfurovum	1	Sulfurovum	genus	Ok
Bacteria		Bacteroidota	Bacteroidia	Marinilabiliales	Prolixibacteraceae	Sunxiuqinia	1	Sunxiuqinia	genus	Ok
Bacteria		Pseudomonadota	Betaproteobacteria	Burkholderiales	Sutterellaceae	Sutterella	1	Sutterella	genus	Ok
Bacteria		Bacillota	Clostridia	Eubacteriales	Symbiobacteriaceae	Symbiobacterium	1	Symbiobacterium	genus	Ok
Bacteria		Planctomycetota	Planctomycetia	Planctomycetales	Planctomycetaceae	Symmachiella	1	Symmachiella	genus	Ok
Bacteria		Cyanobacteriota	Cyanophyceae	Oscillatoriales	Microcoleaceae	Symploca	1	Symploca	genus	Ok
Bacteria		Cyanobacteriota	Cyanophyceae	Synechococcales	Synechococcaceae	Synechococcus	1	Synechococcus	genus	Ok
Bacteria		Bacillota	Clostridia	Thermoanaerobacterales	Thermoanaerobacterales Family III. Incertae Sedis	Syntrophaceticus	1	Syntrophaceticus	genus	Ok
Bacteria		Thermodesulfobacteriota	Syntrophobacteria	Syntrophobacterales	Syntrophobacteraceae	Syntrophobacter	1	Syntrophobacter	genus	Ok
Bacteria		Bacillota	Clostridia	Eubacteriales	Desulfitobacteriaceae	Syntrophobotulus	1	Syntrophobotulus	genus	Ok
Bacteria		Bacillota	Clostridia	Eubacteriales	Syntrophomonadaceae	Syntrophomonas	1	Syntrophomonas	genus	Ok
Bacteria		Thermodesulfobacteriota	Syntrophorhabdia	Syntrophorhabdales	Syntrophorhabdaceae	Syntrophorhabdus	1	Syntrophorhabdus	genus	Ok
Bacteria		Thermodesulfobacteriota	Desulfuromonadia	Desulfuromonadales	Syntrophotaleaceae	Syntrophotalea	1	Syntrophotalea	genus	Ok
Bacteria		Bacillota	Clostridia	Eubacteriales	Syntrophomonadaceae	Syntrophothermus	1	Syntrophothermus	genus	Ok
Bacteria						Syntrophus	1	Syntrophus	genus	Ok
Bacteria		Pseudomonadota	Alphaproteobacteria	Rhodobacterales	Paracoccaceae	Szabonella	1	Szabonella	genus	Ok
Bacteria		Pseudomonadota	Alphaproteobacteria	Rhodobacterales	Paracoccaceae	Tabrizicola	1	Tabrizicola	genus	Ok
Bacteria		Pseudomonadota	Gammaproteobacteria	Xanthomonadales	Rhodanobacteraceae	Tahibacter	1	Tahibacter	genus	Ok
Bacteria		Bacteroidota	Chitinophagia	Chitinophagales	Chitinophagaceae	Taibaiella	1	Taibaiella	genus	Ok
Bacteria		Actinomycetota	Actinomycetes	Pseudonocardiales	Pseudonocardiaceae	Tamaricihabitans	1	Tamaricihabitans	genus	Ok
Bacteria		Bacteroidota	Bacteroidia	Marinilabiliales	Prolixibacteraceae	Tangfeifania	1	Tangfeifania	genus	Ok
Bacteria		Bacteroidota	Bacteroidia	Bacteroidales	Tannerellaceae	Tannerella	1	Tannerella	genus	Ok
Bacteria		Pseudomonadota	Alphaproteobacteria	Sphingomonadales	Sphingomonadaceae	Tardibacter	1	Tardibacter	genus	Ok
Bacteria		Pseudomonadota	Alphaproteobacteria	Hyphomicrobiales	Nitrobacteraceae	Tardiphaga	1	Tardiphaga	genus	Ok
Bacteria		Pseudomonadota	Alphaproteobacteria	Rhodobacterales	Roseobacteraceae	Tateyamaria	1	Tateyamaria	genus	Ok
Bacteria		Pseudomonadota	Gammaproteobacteria	Legionellales	Legionellaceae	Tatlockia	1	Tatlockia	genus	Ok
Bacteria		Planctomycetota	Planctomycetia	Isosphaerales	Isosphaeraceae	Tautonia	1	Tautonia	genus	Ok
Bacteria		Pseudomonadota	Betaproteobacteria	Burkholderiales	Alcaligenaceae	Taylorella	1	Taylorella	genus	Ok
Bacteria		Planctomycetota	Planctomycetia	Gemmatales	Gemmataceae	Telmatocola	1	Telmatocola	genus	Ok
Bacteria		Pseudomonadota	Alphaproteobacteria	Rhodospirillales	Rhodospirillaceae	Telmatospirillum	1	Telmatospirillum	genus	Ok
Bacteria		Bacteroidota	Flavobacteriia	Flavobacteriales	Flavobacteriaceae	Tenacibaculum	1	Tenacibaculum	genus	Ok
Bacteria		Actinomycetota	Actinomycetes	Propionibacteriales	Nocardioidaceae	Tenggerimyces	1	Tenggerimyces	genus	Ok
Bacteria		Chloroflexota	Ktedonobacteria	Ktedonobacterales	Dictyobacteraceae	Tengunoibacter	1	Tengunoibacter	genus	Ok
Bacteria		Bacteroidota	Bacteroidia	Bacteroidales	Tenuifilaceae	Tenuifilum	1	Tenuifilum	genus	Ok
Bacteria		Pseudomonadota	Alphaproteobacteria	Hyphomicrobiales	Tepidamorphaceae	Tepidamorphus	1	Tepidamorphus	genus	Ok
Bacteria		Bacillota	Clostridia	Thermosediminibacterales	Tepidanaerobacteraceae	Tepidanaerobacter	1	Tepidanaerobacter	genus	Ok
Bacteria		Bacillota	Bacilli	Bacillales	Bacillaceae	Tepidibacillus	1	Tepidibacillus	genus	Ok
Bacteria		Bacillota	Clostridia	Eubacteriales	Peptostreptococcaceae	Tepidibacter	1	Tepidibacter	genus	Ok
Bacteria		Pseudomonadota	Alphaproteobacteria	Hyphomicrobiales	Parvibaculaceae	Tepidicaulis	1	Tepidicaulis	genus	Ok
Bacteria		Pseudomonadota	Betaproteobacteria	Burkholderiales		Tepidicella	1	Tepidicella	genus	Ok
Bacteria		Bacillota	Tissierellia	Tissierellales	Tepidimicrobiaceae	Tepidimicrobium	1	Tepidimicrobium	genus	Ok
Bacteria		Pseudomonadota	Betaproteobacteria	Burkholderiales		Tepidimonas	1	Tepidimonas	genus	Ok
Bacteria		Pseudomonadota	Hydrogenophilia	Hydrogenophilales	Hydrogenophilaceae	Tepidiphilus	1	Tepidiphilus	genus	Ok
Bacteria		Planctomycetota	Phycisphaerae	Tepidisphaerales	Tepidisphaeraceae	Tepidisphaera	1	Tepidisphaera	genus	Ok
Bacteria		Thermotogota	Thermotogae	Petrotogales	Petrotogaceae	Tepiditoga	1	Tepiditoga	genus	Ok
Bacteria		Pseudomonadota	Alphaproteobacteria	Rhodospirillales	Terasakiellaceae	Terasakiella	1	Terasakiella	genus	Ok
Bacteria		Acidobacteriota	Terriglobia	Terriglobales	Acidobacteriaceae	Terriglobus	1	Terriglobus	genus	Ok
Bacteria		Pseudomonadota	Alphaproteobacteria	Hyphomicrobiales		Terrihabitans	1	Terrihabitans	genus	Ok
Bacteria		Bacteroidota	Chitinophagia	Chitinophagales	Chitinophagaceae	Terrimonas	1	Terrimonas	genus	Ok
Bacteria		Actinomycetota	Actinomycetes	Propionibacteriales	Propionibacteriaceae	Tessaracoccus	1	Tessaracoccus	genus	Ok
Bacteria		Actinomycetota	Actinomycetes	Micrococcales	Intrasporangiaceae	Tetrasphaera	1	Tetrasphaera	genus	Ok
Bacteria		Bacillota	Bacilli	Bacillales	Bacillaceae	Thalassobacillus	1	Thalassobacillus	genus	Ok
Bacteria		Pseudomonadota	Alphaproteobacteria	Rhodobacterales	Roseobacteraceae	Thalassobacter	1	Thalassobacter	genus	Ok
Bacteria		Pseudomonadota	Alphaproteobacteria	Rhodospirillales	Thalassobaculaceae	Thalassobaculum	1	Thalassobaculum	genus	Ok
Bacteria		Pseudomonadota	Alphaproteobacteria	Rhodobacterales	Paracoccaceae	Thalassobium	1	Thalassobium	genus	Ok
Bacteria		Pseudomonadota	Alphaproteobacteria	Rhodobacterales	Roseobacteraceae	Thalassobius	1	Thalassobius	genus	Ok
Bacteria		Pseudomonadota	Alphaproteobacteria	Rhodobacterales	Roseobacteraceae	Thalassococcus	1	Thalassococcus	genus	Ok
Bacteria		Pseudomonadota	Gammaproteobacteria	Oceanospirillales	Oceanospirillaceae	Thalassolituus	1	Thalassolituus	genus	Ok
Bacteria		Pseudomonadota	Gammaproteobacteria	Alteromonadales	Colwelliaceae	Thalassomonas	1	Thalassomonas	genus	Ok
Bacteria		Pseudomonadota	Alphaproteobacteria	Rhodobacterales	Paracoccaceae	Thalassorhabdomicrobium	1	Thalassorhabdomicrobium	genus	Ok
Bacteria		Pseudomonadota	Alphaproteobacteria	Rhodospirillales	Thalassospiraceae	Thalassospira	1	Thalassospira	genus	Ok
Bacteria		Pseudomonadota	Gammaproteobacteria	Alteromonadales	Colwelliaceae	Thalassotalea	1	Thalassotalea	genus	Ok
Bacteria		Pseudomonadota	Betaproteobacteria	Rhodocyclales	Zoogloeaceae	Thauera	1	Thauera	genus	Ok
Bacteria		Bacillota	Clostridia	Thermoanaerobacterales	Thermoanaerobacteraceae	Thermacetogenium	1	Thermacetogenium	genus	Ok
Bacteria		Bacillota	Clostridia	Eubacteriales	Clostridiales Family XVII. Incertae Sedis	Thermaerobacter	1	Thermaerobacter	genus	Ok
Bacteria		Bacillota	Clostridia	Moorellales	Moorellaceae	Thermanaeromonas	1	Thermanaeromonas	genus	Ok
Bacteria		Bacillota	Clostridia	Eubacteriales	Peptococcaceae	Thermanaerosceptrum	1	Thermanaerosceptrum	genus	Ok
Bacteria		Chloroflexota	Anaerolineae	Anaerolineales	Anaerolineaceae	Thermanaerothrix	1	Thermanaerothrix	genus	Ok
Bacteria		Synergistota	Synergistia	Synergistales	Synergistaceae	Thermanaerovibrio	1	Thermanaerovibrio	genus	Ok
Bacteria		Bacillota	Bacilli	Bacillales	Bacillales Family X. Incertae Sedis	Thermicanus	1	Thermicanus	genus	Ok
Bacteria		Bacillota	Clostridia	Eubacteriales	Thermincolaceae	Thermincola	1	Thermincola	genus	Ok
Bacteria		Bacillota	Clostridia	Thermoanaerobacterales	Thermoanaerobacteraceae	Thermoanaerobacter	1	Thermoanaerobacter	genus	Ok
Bacteria		Bacillota	Clostridia	Thermoanaerobacterales	Thermoanaerobacteraceae	Thermoanaerobacterium	1	Thermoanaerobacterium	genus	Ok
Bacteria		Bacillota	Clostridia	Eubacteriales	Oscillospiraceae	Thermoclostridium	1	Thermoclostridium	genus	Ok
Archaea		Euryarchaeota	Thermococci	Thermococcales	Thermococcaceae	Thermococcus	1	Thermococcus	genus	Ok
Bacteria		Thermodesulfobacteriota	Thermodesulfobacteria	Thermodesulfobacteriales	Thermodesulfatatoraceae	Thermodesulfatator	1	Thermodesulfatator	genus	Ok
Bacteria		Bacillota	Clostridia	Thermoanaerobacterales	Thermoanaerobacteraceae	Thermodesulfitimonas	1	Thermodesulfitimonas	genus	Ok
Bacteria		Thermodesulfobacteriota	Thermodesulfobacteria	Thermodesulfobacteriales	Thermodesulfobacteriaceae	Thermodesulfobacterium	1	Thermodesulfobacterium	genus	Ok
Bacteria		Bacillota	Clostridia	Thermoanaerobacterales	Thermodesulfobiaceae	Thermodesulfobium	1	Thermodesulfobium	genus	Ok
Bacteria		Thermodesulfobacteriota	Syntrophobacteria	Syntrophobacterales	Thermodesulforhabdaceae	Thermodesulforhabdus	1	Thermodesulforhabdus	genus	Ok
Bacteria		Nitrospirota	Thermodesulfovibrionia	Thermodesulfovibrionales	Thermodesulfovibrionaceae	Thermodesulfovibrio	1	Thermodesulfovibrio	genus	Ok
Archaea		Thermoproteota	Thermoprotei	Thermofilales	Thermofilaceae	Thermofilum	1	Thermofilum	genus	Ok
Bacteria		Bacteroidota	Chitinophagia	Chitinophagales	Chitinophagaceae	Thermoflavifilum	1	Thermoflavifilum	genus	Ok
Bacteria		Chloroflexota	Thermoflexia	Thermoflexales	Thermoflexaceae	Thermoflexus	1	Thermoflexus	genus	Ok
Bacteria		Planctomycetota	Planctomycetia	Gemmatales	Gemmataceae	Thermogemmata	1	Thermogemmata	genus	Ok
Bacteria		Chloroflexota	Ktedonobacteria	Thermogemmatisporales	Thermogemmatisporaceae	Thermogemmatispora	1	Thermogemmatispora	genus	Ok
Bacteria		Planctomycetota	Planctomycetia	Pirellulales	Thermoguttaceae	Thermogutta	1	Thermogutta	genus	Ok
Bacteria		Actinomycetota	Thermoleophilia	Thermoleophilales	Thermoleophilaceae	Thermoleophilum	1	Thermoleophilum	genus	Ok
Bacteria		Pseudomonadota	Gammaproteobacteria	Xanthomonadales	Xanthomonadaceae	Thermomonas	1	Thermomonas	genus	Ok
Bacteria		Pseudomonadota	Alphaproteobacteria			Thermopetrobacter	1	Thermopetrobacter	genus	Ok
Bacteria		Bacillota	Clostridia	Thermosediminibacterales	Thermosediminibacteraceae	Thermosediminibacter	1	Thermosediminibacter	genus	Ok
Bacteria		Bacillota	Negativicutes	Selenomonadales	Sporomusaceae	Thermosinus	1	Thermosinus	genus	Ok
Bacteria						Thermosipho	1	Thermosipho	genus	Ok
Bacteria		Chloroflexota	Ktedonobacteria	Ktedonobacterales	Thermosporotrichaceae	Thermosporothrix	1	Thermosporothrix	genus	Ok
Bacteria		Thermodesulfobacteriota	Thermodesulfobacteria	Thermodesulfobacteriales	Thermodesulfobacteriaceae	Thermosulfurimonas	1	Thermosulfurimonas	genus	Ok
Bacteria		Cyanobacteriota	Cyanophyceae	Pseudanabaenales	Thermosynechococcaceae	Thermosynechococcus	1	Thermosynechococcus	genus	Ok
Bacteria		Bacillota	Clostridia	Eubacteriales	Syntrophomonadaceae	Thermosyntropha	1	Thermosyntropha	genus	Ok
Bacteria		Bacillota	Clostridia	Eubacteriales	Clostridiaceae	Thermotalea	1	Thermotalea	genus	Ok
Bacteria		Thermotogota	Thermotogae	Thermotogales	Thermotogaceae	Thermotoga	1	Thermotoga	genus	Ok
Bacteria		Bacillota	Clostridia	Thermosediminibacterales	Thermosediminibacteraceae	Thermovenabulum	1	Thermovenabulum	genus	Ok
Bacteria		Synergistota	Synergistia	Synergistales	Thermovirgaceae	Thermovirga	1	Thermovirga	genus	Ok
Bacteria		Deinococcota	Deinococci	Thermales	Thermaceae	Thermus	1	Thermus	genus	Ok
Bacteria		Pseudomonadota	Gammaproteobacteria	Chromatiales	Ectothiorhodospiraceae	Thioalbus	1	Thioalbus	genus	Ok
Bacteria		Pseudomonadota	Gammaproteobacteria	Chromatiales	Ectothiorhodospiraceae	Thioalkalivibrio	1	Thioalkalivibrio	genus	Ok
Bacteria		Pseudomonadota	Betaproteobacteria	Nitrosomonadales	Thiobacillaceae	Thiobacillus	1	Thiobacillus	genus	Ok
Bacteria		Pseudomonadota	Gammaproteobacteria	Chromatiales	Chromatiaceae	Thiocapsa	1	Thiocapsa	genus	Ok
Bacteria		Pseudomonadota	Alphaproteobacteria	Rhodobacterales	Paracoccaceae	Thioclava	1	Thioclava	genus	Ok
Bacteria		Pseudomonadota	Gammaproteobacteria	Chromatiales	Chromatiaceae	Thiococcus	1	Thiococcus	genus	Ok
Bacteria		Pseudomonadota	Gammaproteobacteria	Chromatiales	Chromatiaceae	Thiocystis	1	Thiocystis	genus	Ok
Bacteria		Pseudomonadota	Gammaproteobacteria	Chromatiales	Chromatiaceae	Thiodictyon	1	Thiodictyon	genus	Ok
Bacteria		Pseudomonadota	Gammaproteobacteria	Chromatiales	Chromatiaceae	Thioflavicoccus	1	Thioflavicoccus	genus	Ok
Bacteria		Pseudomonadota	Gammaproteobacteria	Chromatiales	Ectothiorhodospiraceae	Thiogranum	1	Thiogranum	genus	Ok
Bacteria		Pseudomonadota	Gammaproteobacteria	Chromatiales		Thiohalobacter	1	Thiohalobacter	genus	Ok
Bacteria		Pseudomonadota	Gammaproteobacteria	Chromatiales	Chromatiaceae	Thiohalocapsa	1	Thiohalocapsa	genus	Ok
Bacteria		Pseudomonadota	Gammaproteobacteria	Chromatiales	Ectothiorhodospiraceae	Thiohalomonas	1	Thiohalomonas	genus	Ok
Bacteria		Pseudomonadota	Gammaproteobacteria	Chromatiales	Thioalkalispiraceae	Thiohalophilus	1	Thiohalophilus	genus	Ok
Bacteria		Pseudomonadota	Gammaproteobacteria			Thiohalorhabdus	1	Thiohalorhabdus	genus	Ok
Bacteria		Pseudomonadota	Gammaproteobacteria			Thiolapillus	1	Thiolapillus	genus	Ok
Bacteria		Pseudomonadota	Gammaproteobacteria	Thiotrichales	Piscirickettsiaceae	Thiomicrorhabdus	1	Thiomicrorhabdus	genus	Ok
Bacteria		Pseudomonadota	Gammaproteobacteria	Thiotrichales	Piscirickettsiaceae	Thiomicrospira	1	Thiomicrospira	genus	Ok
Bacteria		Pseudomonadota	Betaproteobacteria	Burkholderiales		Thiomonas	1	Thiomonas	genus	Ok
Bacteria		Pseudomonadota	Gammaproteobacteria	Pseudomonadales	Pseudomonadaceae	Thiopseudomonas	1	Thiopseudomonas	genus	Ok
Bacteria		Pseudomonadota	Alphaproteobacteria	Rhodobacterales	Roseobacteraceae	Thiosulfatihalobacter	1	Thiosulfatihalobacter	genus	Ok
Bacteria		Pseudomonadota	Gammaproteobacteria	Thiotrichales	Piscirickettsiaceae	Thiosulfativibrio	1	Thiosulfativibrio	genus	Ok
Bacteria		Pseudomonadota	Gammaproteobacteria	Thiotrichales	Thiotrichaceae	Thiothrix	1	Thiothrix	genus	Ok
Bacteria		Pseudomonadota	Betaproteobacteria	Burkholderiales	Comamonadaceae	Tibeticola	1	Tibeticola	genus	Ok
Bacteria		Kiritimatiellota	Tichowtungiia	Tichowtungiales	Tichowtungiaceae	Tichowtungia	1	Tichowtungia	genus	Ok
Bacteria		Bacteroidota	Bacteroidia	Bacteroidales	Rikenellaceae	Tidjanibacter	1	Tidjanibacter	genus	Ok
Bacteria		Bacillota	Clostridia	Eubacteriales	Clostridiaceae	Tindallia	1	Tindallia	genus	Ok
Bacteria		Bacillota	Tissierellia	Tissierellales	Tissierellaceae	Tissierella	1	Tissierella	genus	Ok
Bacteria		Pseudomonadota	Alphaproteobacteria	Hyphomicrobiales	Rhodovibrionaceae	Tistlia	1	Tistlia	genus	Ok
Bacteria		Pseudomonadota	Alphaproteobacteria	Rhodospirillales	Geminicoccaceae	Tistrella	1	Tistrella	genus	Ok
Bacteria		Pseudomonadota	Gammaproteobacteria	Enterobacterales	Enterobacteriaceae	Trabulsiella	1	Trabulsiella	genus	Ok
Bacteria		Pseudomonadota	Alphaproteobacteria	Rhodobacterales	Roseobacteraceae	Tranquillimonas	1	Tranquillimonas	genus	Ok
Bacteria		Spirochaetota	Spirochaetia	Spirochaetales	Treponemataceae	Treponema	1	Treponema	genus	Ok
Bacteria		Thermodesulfobacteriota	Desulfuromonadia	Geobacterales	Geobacteraceae	Trichlorobacter	1	Trichlorobacter	genus	Ok
Bacteria		Bacillota	Bacilli	Lactobacillales	Carnobacteriaceae	Trichococcus	1	Trichococcus	genus	Ok
Bacteria		Cyanobacteriota	Cyanophyceae	Nostocales	Nostocaceae	Trichormus	1	Trichormus	genus	Ok
Bacteria		Pseudomonadota	Alphaproteobacteria	Rhodobacterales	Paracoccaceae	Tritonibacter	1	Tritonibacter	genus	Ok
Bacteria		Pseudomonadota	Alphaproteobacteria	Rhodobacterales	Roseobacteraceae	Tropicibacter	1	Tropicibacter	genus	Ok
Bacteria		Pseudomonadota	Alphaproteobacteria	Rhodobacterales	Roseobacteraceae	Tropicimonas	1	Tropicimonas	genus	Ok
Bacteria		Deinococcota	Deinococci	Trueperales	Trueperaceae	Truepera	1	Truepera	genus	Ok
Bacteria		Actinomycetota	Actinomycetes	Mycobacteriales	Tsukamurellaceae	Tsukamurella	1	Tsukamurella	genus	Ok
Bacteria		Pseudomonadota	Alphaproteobacteria	Sphingomonadales	Erythrobacteraceae	Tsuneonella	1	Tsuneonella	genus	Ok
Bacteria		Bacillota	Bacilli	Bacillales	Alicyclobacillaceae	Tumebacillus	1	Tumebacillus	genus	Ok
Bacteria		Spirochaetota	Spirochaetia	Leptospirales	Leptospiraceae	Turneriella	1	Turneriella	genus	Ok
Bacteria		Planctomycetota	Planctomycetia	Gemmatales	Gemmataceae	Tuwongella	1	Tuwongella	genus	Ok
Bacteria		Pseudomonadota	Betaproteobacteria	Rhodocyclales	Zoogloeaceae	Uliginosibacterium	1	Uliginosibacterium	genus	Ok
Bacteria		Pseudomonadota	Betaproteobacteria	Burkholderiales	Oxalobacteraceae	Undibacterium	1	Undibacterium	genus	Ok
Bacteria		Bacillota	Bacilli	Bacillales	Planococcaceae	Ureibacillus	1	Ureibacillus	genus	Ok
Bacteria		Bacillota	Bacilli	Lactobacillales	Enterococcaceae	Vagococcus	1	Vagococcus	genus	Ok
Bacteria		Bacillota	Clostridia	Eubacteriales	Vallitaleaceae	Vallitalea	1	Vallitalea	genus	Ok
Bacteria		Candidatus Melainabacteria		Vampirovibrionales		Vampirovibrio	1	Vampirovibrio	genus	Ok
Bacteria		Actinomycetota	Actinomycetes	Actinomycetales	Actinomycetaceae	Varibaculum	1	Varibaculum	genus	Ok
Bacteria		Pseudomonadota	Alphaproteobacteria	Hyphomicrobiales	Nitrobacteraceae	Variibacter	1	Variibacter	genus	Ok
Bacteria		Pseudomonadota	Betaproteobacteria	Burkholderiales	Comamonadaceae	Variovorax	1	Variovorax	genus	Ok
Bacteria		Pseudomonadota	Alphaproteobacteria	Rhodospirillales	Thalassospiraceae	Varunaivibrio	1	Varunaivibrio	genus	Ok
Bacteria		Bacillota	Negativicutes	Veillonellales	Veillonellaceae	Veillonella	1	Veillonella	genus	Ok
Bacteria		Pseudomonadota	Betaproteobacteria	Burkholderiales	Comamonadaceae	Verminephrobacter	1	Verminephrobacter	genus	Ok
Bacteria		Pseudomonadota	Gammaproteobacteria	Vibrionales	Vibrionaceae	Veronia	1	Veronia	genus	Ok
Bacteria		Pseudomonadota	Gammaproteobacteria	Vibrionales	Vibrionaceae	Vibrio	1	Vibrio	genus	Ok
Bacteria		Bacteroidota	Flavobacteriia	Flavobacteriales	Vicingaceae	Vicingus	1	Vicingus	genus	Ok
Bacteria		Lentisphaerota	Lentisphaeria	Victivallales	Victivallaceae	Victivallis	1	Victivallis	genus	Ok
Bacteria		Pseudomonadota	Alphaproteobacteria	Hyphomicrobiales		Vineibacter	1	Vineibacter	genus	Ok
Bacteria		Bacillota	Bacilli	Bacillales	Bacillaceae	Virgibacillus	1	Virgibacillus	genus	Ok
Bacteria		Pseudomonadota	Betaproteobacteria	Neisseriales	Neisseriaceae	Vitreoscilla	1	Vitreoscilla	genus	Ok
Bacteria		Pseudomonadota	Betaproteobacteria	Neisseriales	Chromobacteriaceae	Vogesella	1	Vogesella	genus	Ok
Bacteria		Chlamydiota	Chlamydiia	Parachlamydiales	Waddliaceae	Waddlia	1	Waddlia	genus	Ok
Bacteria		Bacillota	Bacilli	Lactobacillales	Lactobacillaceae	Weissella	1	Weissella	genus	Ok
Bacteria		Bacillota	Bacilli	Bacillales	Bacillaceae	Weizmannia	1	Weizmannia	genus	Ok
Bacteria		Pseudomonadota	Gammaproteobacteria	Chromatiales	Wenzhouxiangellaceae	Wenzhouxiangella	1	Wenzhouxiangella	genus	Ok
Bacteria		Actinomycetota	Actinomycetes	Mycobacteriales	Nocardiaceae	Williamsia	1	Williamsia	genus	Ok
Bacteria		Bacteroidota	Flavobacteriia	Flavobacteriales	Flavobacteriaceae	Winogradskyella	1	Winogradskyella	genus	Ok
Bacteria		Pseudomonadota	Alphaproteobacteria	Maricaulales	Maricaulaceae	Woodsholea	1	Woodsholea	genus	Ok
Bacteria		Pseudomonadota	Alphaproteobacteria	Hyphomicrobiales	Xanthobacteraceae	Xanthobacter	1	Xanthobacter	genus	Ok
Bacteria		Pseudomonadota	Gammaproteobacteria	Xanthomonadales	Xanthomonadaceae	Xanthomonas	1	Xanthomonas	genus	Ok
Bacteria		Pseudomonadota	Betaproteobacteria	Burkholderiales	Comamonadaceae	Xenophilus	1	Xenophilus	genus	Ok
Bacteria		Pseudomonadota	Alphaproteobacteria	Rhodobacterales	Paracoccaceae	Xinfangfangia	1	Xinfangfangia	genus	Ok
Bacteria		Pseudomonadota	Gammaproteobacteria	Xanthomonadales	Xanthomonadaceae	Xylella	1	Xylella	genus	Ok
Bacteria		Pseudomonadota	Betaproteobacteria	Burkholderiales		Xylophilus	1	Xylophilus	genus	Ok
Bacteria		Pseudomonadota	Alphaproteobacteria	Rhodobacterales	Roseobacteraceae	Yangia	1	Yangia	genus	Ok
Bacteria		Bacillota	Clostridia	Eubacteriales	Yeguiaceae	Yeguia	1	Yeguia	genus	Ok
Bacteria		Bacteroidota	Flavobacteriia	Flavobacteriales	Flavobacteriaceae	Yeosuana	1	Yeosuana	genus	Ok
Bacteria						Yersinia	1	Yersinia	genus	Ok
Bacteria		Actinomycetota	Actinomycetes	Micrococcales	Dermacoccaceae	Yimella	1	Yimella	genus	Ok
Bacteria		Pseudomonadota	Gammaproteobacteria	Enterobacterales	Enterobacteriaceae	Yokenella	1	Yokenella	genus	Ok
Bacteria		Pseudomonadota	Alphaproteobacteria	Rhodobacterales	Paracoccaceae	Yoonia	1	Yoonia	genus	Ok
Bacteria		Bacillota	Clostridia	Eubacteriales	Clostridiaceae	Youngiibacter	1	Youngiibacter	genus	Ok
Bacteria		Planctomycetota	Planctomycetia	Gemmatales	Gemmataceae	Zavarzinella	1	Zavarzinella	genus	Ok
Bacteria		Pseudomonadota	Alphaproteobacteria	Rhodospirillales	Zavarziniaceae	Zavarzinia	1	Zavarzinia	genus	Ok
Bacteria		Pseudomonadota	Betaproteobacteria	Burkholderiales	Burkholderiaceae	Zeimonas	1	Zeimonas	genus	Ok
Bacteria		Bacillota	Clostridia	Moorellales	Zhaonellaceae	Zhaonella	1	Zhaonella	genus	Ok
Bacteria		Pseudomonadota	Alphaproteobacteria	Hyphomicrobiales	Phyllobacteriaceae	Zhengella	1	Zhengella	genus	Ok
Bacteria		Pseudomonadota	Gammaproteobacteria	Cellvibrionales	Spongiibacteraceae	Zhongshania	1	Zhongshania	genus	Ok
Bacteria		Bacteroidota	Flavobacteriia	Flavobacteriales	Flavobacteriaceae	Zhouia	1	Zhouia	genus	Ok
Bacteria		Pseudomonadota	Gammaproteobacteria	Aeromonadales	Aeromonadaceae	Zobellella	1	Zobellella	genus	Ok
Bacteria		Bacteroidota	Flavobacteriia	Flavobacteriales	Flavobacteriaceae	Zobellia	1	Zobellia	genus	Ok
Bacteria		Pseudomonadota	Betaproteobacteria	Rhodocyclales	Zoogloeaceae	Zoogloea	1	Zoogloea	genus	Ok
Bacteria		Bacteroidota	Flavobacteriia	Flavobacteriales	Flavobacteriaceae	Zunongwangia	1	Zunongwangia	genus	Ok
Bacteria		Pseudomonadota	Alphaproteobacteria	Sphingomonadales	Zymomonadaceae	Zymomonas	1	Zymomonas	genus	Ok
